# Supplementary material for: Integrative Metabolomic and Transcriptomic Landscape during Akebia trifoliata Fruit Ripening and Cracking
Source: Int J Mol Sci. 2023 Nov 24;24(23):16732. doi: 10.3390/ijms242316732 (PMC10706055; doi:10.3390/ijms242316732)
Supplement: Supplementary file 1 [file ijms-24-16732-s001.zip]

Archive with 8 entries (8 files):
- Figures.pdf
- Table S1.xlsx
- Table S2.xlsx
- Table S3.xlsx
- Table S4.xlsx
- Table S5.xlsx
- Table S6.xlsx
- Table S7.xlsx
