# Supplementary material for: Integrative Metabolomic and Transcriptomic Landscape during Akebia trifoliata Fruit Ripening and Cracking
Source: Int J Mol Sci. 2023 Nov 24;24(23):16732. doi: 10.3390/ijms242316732 (PMC10706055; doi:10.3390/ijms242316732)
Supplement: Supplementary file 1 [file ijms-24-16732-s001.zip › Table S1.xlsx]

## Sheet: Total DAMs
Compound	m/z	Retention time (min)	Accepted Description	Adducts	Formula	Score	Fragmentation Score	Mass Error (ppm)	KEGG	Class
0.63_130.0497m/z	130.05	0.63175	Pyroglutamic acid	M+H	C5H7NO3	45.4	30.1	-1.38971	C01879	Amino acids and derivatives
0.63_132.0301m/z	132.03	0.629083	L-Aspartic acid	M-H	C4H7NO4	47.6	40.2	-1.14788	C00049	Amino acids and derivatives
0.63_145.0616m/z	145.062	0.629083	L-Glutamine	M-H	C5H10N2O3	46.4	37.6	-1.64741	C00064	Amino acids and derivatives
0.63_257.1026n	258.11	0.63175	Glycerophosphocholine	M+H, M+NH4	C8H20NO6P	41.4	11.7	-0.744071	C00670	Lipids
0.65_333.0590m/z	333.059	0.6497	1-(sn-Glycero-3-phospho)-1D-myo-inositol	M-H	C9H19O11P	48	42.2	-0.729509	C01225	Lipids
0.66_199.0009m/z	199.001	0.66345	D-Erythrose 4-phosphate	M-H	C4H9O7P	43.8	24.8	-1.88814	C00279	Other
0.66_277.0325m/z	277.032	0.66345	D-Ribitol 5-phosphate	M+FA-H	C5H13O8P	38.6	0	-2.38706	C01068	Organic acids and derivatives
0.66_585.1428m/z	585.143	0.65925	2-hydroxyflutamide	2M+H	C11H11F3N2O4	38.9	0.0364	2.25252	C14204	Other
0.66_98.9838m/z	98.9838	0.66	Phosphoric acid	M+H	H3O4P	39	0	-3.34638	C00009	Other
0.67_261.0370m/z	261.037	0.666133	Galactose 1-phosphate	M+H	C6H13O9P	42	14.8	-0.135884	C00446	Carbohydrates
0.68_245.0422m/z	245.042	0.68	Isopimpinellin	M-H	C13H10O5	35.8	0	-13.5205	C02162	Phenylpropanoids
0.69_441.1005m/z	441.1	0.693717	Gluconasturtiin	M+NH4	C15H21NO9S2	36.4	2.54	2.11255	C08417	Carbohydrates
0.71_358.1491m/z	358.149	0.714333	Linocinnamarin	M+NH4	C16H20O8	38.2	3.76	-1.45153	-	Phenolic glycosides
0.73_115.0036m/z	115.004	0.732283	Fumaric acid	M-H	C4H4O4	39.4	0	-1.1085	C00122	Organic acids and derivatives
0.73_133.0140m/z	133.014	0.732283	L-Malic acid	M-H	C4H6O5	43.8	21.4	-1.53487	C00149	Organic acids and derivatives
0.77_606.0743m/z	606.074	0.77355	UDP-N-acetyl-alpha-D-glucosamine	M-H	C17H27N3O17P2	40	13.9	0.0928784	C00043	Other
0.81_275.0213m/z	275.021	0.8148	5-(4-Acetoxybut-1-ynyl)-2,2'-bithiophene	M-H	C14H12O2S2	35.3	0	2.64426	C04485	Other
0.91_348.0703m/z	348.07	0.906867	Adenosine monophosphate	M+H	C10H14N5O7P	39.9	10.6	-0.0770596	C00020	Other
0.94_129.0192m/z	129.019	0.938583	3-Butynoate	M+FA-H	C4H4O2	39.3	0	-2.16273	C06144	Organic acids and derivatives
0.95_130.9984m/z	130.998	0.94545	Oxaloacetate	M-H	C4H4O5	39.8	5.12	-1.25147	C00036	Organic acids and derivatives
0.95_87.0086m/z	87.0086	0.94545	Pyruvic acid	M-H	C3H4O3	39.3	0	-1.66581	C00022	Organic acids and derivatives
1.09_811.2395m/z	811.239	1.09482	Astringin	2M-H	C20H22O9	37.1	0.342	-7.43339	C10245	Lipids
1.12_111.0086m/z	111.009	1.12233	2-Furoic acid	M-H	C5H4O3	47.1	38.1	-1.55102	C01546	Organic acids and derivatives
1.12_173.0089m/z	173.009	1.12233	cis-Aconitic acid	M-H	C6H6O6	39.6	3.75	-1.45756	C00417	Organic acids and derivatives
1.12_191.0193m/z	191.019	1.12233	Citric acid	M-H	C6H8O7	40.9	8.37	-2.19873	C00158	Organic acids and derivatives
1.20_180.0663m/z	180.066	1.20495	L-Tyrosine	M-H	C9H11NO3	38.5	0	-1.65238	C00082	Amino acids and derivatives
1.36_123.0439m/z	123.044	1.36038	4-Hydroxybenzaldehyde	M+H	C7H6O2	42.6	21.6	-1.32654	C00633	Other
1.37_164.0471n	165.054	1.36727	p-Coumaric acid	M+H, M+NH4	C9H8O3	49	51.2	-1.28012	C00811	Phenolic glycosides
1.41_180.1018m/z	180.102	1.40852	beta-Dolabrin	M+NH4	C10H10O2	51.8	65.7	-0.388673	-	Lipids
1.54_326.1235m/z	326.123	1.5387	4R,5R,6S-Trihydroxy-2-hydroxymethyl-2-cyclohexen-1-one 6-(2-hydroxy-6-methylbenzoate)	M+NH4	C15H16O7	38.6	2	0.111957	-	Benzene and derivatives
1.55_767.2460m/z	767.246	1.54677	Acetyl-maltose	2M-H	C14H24O12	39.1	0	-0.398643	C02130	Carbohydrates
1.94_164.0705m/z	164.071	1.93752	Coumarin	M+NH4	C9H6O2	38.1	0	-0.659706	C05851	Phenylpropanoids
10.27_521.3481m/z	521.348	10.2718	1alpha,25-dihydroxy-2beta-(2-hydroxyethoxy)vitamin D3 / 1alpha,25-dihydroxy-2beta-(2-hydroxyethoxy)cholecalciferol	M+FA-H	C29H48O5	41.5	11.9	-0.620758	-	Steroids
10.34_473.3625m/z	473.363	10.3356	Priverogenin A	M+H	C30H48O4	50.2	56.5	-0.0466474	-	Triterpenoids
10.35_691.2977m/z	691.298	10.3494	Ustiloxin A	M+NH4	C28H43N5O12S	41.9	25.3	1.51168	-	Amino acids and derivatives
10.38_587.3947m/z	587.395	10.3838	Ilexolide A	M+H	C35H54O7	46.4	45.5	0.739244	-	Triterpenoids
10.38_899.5010m/z	899.501	10.3838	Medicoside C	M+H	C46H74O17	41.7	24.2	1.26239	-	Triterpenoids
10.43_324.1054n	323.098	10.4304	Bis-D-fructose 2',1:2,1'-dianhydride	M-H, M+FA-H	C12H20O10	39.1	0	-0.896203	C04333	Carbohydrates
10.56_795.4526m/z	795.453	10.5553	Cynarasaponin C	M+H	C42H66O14	41.3	21.5	0.135589		Triterpenoids
10.56_956.4993n	957.507	10.5553	Sandosaponin A	M+H, M+NH4, M+Na	C48H76O19	51.1	63.1	1.30058	-	Terpenoids
10.58_485.3261m/z	485.326	10.5828	Liquoric acid	M+H	C30H44O5	40.9	18.7	-0.00224445	-	Triterpenoids
10.58_643.2804m/z	643.28	10.5828	Acronycine	2M+H	C20H19NO3	36.8	0	0.213013	C10632	Other
10.66_501.3218m/z	501.322	10.6555	Callystatin A	M+FA-H	C29H44O4	39.6	0	-0.863986	C16891	Other
10.66_519.3321m/z	519.332	10.6555	18-acetoxy-1alpha,25-dihydroxyvitamin D3 / 18-acetoxy-1alpha,25-dihydroxycholecalciferol	M+FA-H	C29H46O5	49.5	58	-1.3921	-	Steroids
10.68_673.3922m/z	673.392	10.6791	Saponin H	M+Na	C36H58O10	37.3	0.124	0.00515808		Terpenoids
10.76_487.3425m/z	487.343	10.7587	Testosterone decanoate	M+FA-H	C29H46O3	39.4	0	-0.810511	C14607	Other
10.83_945.7187m/z	945.719	10.8304	3alpha-Corosolic acid	2M+H	C30H48O4	45.5	43.5	1.00062	-	Triterpenoids
10.84_929.5126m/z	929.513	10.8373	Araliasaponin I	M+H	C47H76O18	41.1	28.4	2.36082	-	Terpenoids
10.87_648.3744m/z	648.374	10.8724	Nummularine A	M+H	C36H49N5O6	45	38.1	-1.73708	C10011	Organic acids and derivatives
10.93_423.3617m/z	423.362	10.9274	Theonellasterol B	M+H	C30H46O	43.9	35.7	-1.02716	-	Steroids
10.93_469.3670m/z	469.367	10.9274	Ambonic acid	M+H	C31H48O3	50.3	65.7	-1.31618	-	Steroids
10.93_813.4638m/z	813.464	10.9274	Kudzusaponin SA1	M+H	C42H68O15	43.4	34.3	0.888751		Terpenoids
10.98_857.4538m/z	857.454	10.9788	bayogenin 3-O-cellobioside	M+FA-H	C42H68O15	45.1	35	-0.246207	C08932	Triterpenoids
11.06_439.3558m/z	439.356	11.0575	alpha,gamma-Onoceradienedione	M+H	C30H46O2	49.1	59.9	-2.98172	-	Triterpenoids
11.17_943.5271m/z	943.527	11.1675	Soyasaponin I	M+H	C48H78O18	49.4	69.4	1.08006	C08983	Terpenoids
11.21_485.3262m/z	485.326	11.2088	24-Hydroxyglabrolide	M+H	C30H44O5	53	67.2	0.0299233	-	Triterpenoids
11.21_643.2810m/z	643.281	11.2088	PI(20:4(5Z,8Z,11Z,14Z)/0:0)	M+Na	C29H49O12P	35.7	1.07	-7.09848	-	Lipids
11.36_485.2925m/z	485.293	11.3558	Hydrocortisone cypionate	M-H	C29H42O6	40.3	12.8	3.46219	C08176	Steroids
11.38_407.3308m/z	407.331	11.3808	(25S)-24S,26-cyclo-5alpha-cholestan-3beta-ol	M+Na	C27H44O	42.3	23	6.23763	-	Steroids
11.38_425.3413m/z	425.341	11.3808	4,4'-Methylenebis(2,6-di-tert-butylphenol)	M+H	C29H44O2	48.5	51.9	-0.230362	-	Phenylpropanoids
11.38_435.3257m/z	435.326	11.3808	beta-Citraurol	M+H	C30H42O2	44.6	31.8	-0.1628	-	Triterpenoids
11.38_441.3364m/z	441.336	11.3808	Camelledionol	M+H	C29H44O3	51.9	66.3	0.145161	-	Triterpenoids
11.38_471.3468m/z	471.347	11.3808	16-Hydroxy-3-oxo-12-oleanen-28-oic acid	M+H	C30H46O4	55.9	82.1	-0.16134	-	Triterpenoids
11.38_488.3500n	489.357	11.3808	Glyyunnansapogenin B	M+H, M+Na, 2M+H	C30H48O5	49.5	49	-0.257187	-	Triterpenoids
11.39_287.1640m/z	287.164		16alpha-Hydroxyestrone	M+H	C18H22O3	38.2	8.61	-0.483513	C05300	Steroids
11.72_173.1322m/z	173.132	11.7172	1,2-Dihydro-1,1,6-trimethylnaphthalene	M+H	C13H16	49.7	52.6	-1.58676	-	Other
11.72_196.1487n	393.315	11.7172	8E-Hydroxy-4,8-dimethyl-4,9-decadienal	M+Na, 2M+H	C12H20O2	35.5	3.49	11.9731	-	Lipids
11.72_204.1512n	409.31	11.7172	9Z,13-Tetradecadien-11-ynal	M+H, 2M+H	C14H20O	49	49.3	-0.888368	-	Lipids
11.72_407.2945m/z	407.295	11.7172	N-oleoyl taurine	M+NH4	C20H39NO4S	40.8	18	1.88366		Other
11.72_472.3191n	495.308	11.7172	(3beta,17alpha,23R)-17,23-Epoxy-3,29-dihydroxy-27-norlanost-8-ene-15,24-dione	M+H, M+Na, 2M+H	C29H44O5	44.6	25.4	0.443805	-	Triterpenoids
11.72_485.2900m/z	485.29	11.7172	Stigmatellin Y	M+H	C29H40O6	38.4	0.034	0.570188	-	Other
11.75_539.2990m/z	539.299	11.7528	Norselic acid E	M+FA-H	C31H42O5	39.4	6.48	-4.89551	-	Steroids
11.83_429.1907m/z	429.191	11.8341	1-Isomangostin hydrate	M+H	C24H28O7	45.7	34.8	-0.0698026	-	Other
11.83_446.1935m/z	446.193	11.8341	PC(6:2(2E,4E)/6:2(2E,4E))	M+H	C20H32NO8P	38.6	2.7	-0.850944	-	Lipids
12.33_471.3473m/z	471.347	12.3287	Maslinic Acid	M-H	C30H48O4	48.4	45.8	-1.38052	C16939	Triterpenoids
12.36_435.2917m/z	435.292	12.3637	(22E)-25-hydroxy-24-oxo-22,23-didehydrovitamin D3 / (22E)-25-hydroxy-24-oxo-22,23-didehydrocholecalciferol	M+Na	C27H40O3	43.1	31.5	11.5441	-	Steroids
12.36_453.2984m/z	453.298	12.3637	25-Hydroxyvitamin D3-26,23-lactol	M+Na	C27H42O4	37.4	7.43	2.11699	-	Steroids
12.86_971.6611m/z	971.661	12.8633	Thermozeaxanthin-13	M+FA-H	C59H90O8	39.4	0	-0.68484	C15956	Lipids
13.12_421.3098m/z	421.31	13.1197	1alpha-hydroxy-22-(3-methylphenyl)-23,24,25,26,27-pentanorvitamin D3 / 1alpha-hydroxy-22-(3-methylphenyl)-23,24,25,26,27-pentanorcholecalciferol	M+H	C29H40O2	37.3	2.45	-0.635513	-	Steroids
13.33_678.3830n	701.372	13.333	Gingerglycolipid B	M+H, M+NH4, M+Na	C33H58O14	41	11.1	0.499704	-	Lipids
13.35_689.2099m/z	689.21	13.3536	Glycogen	M+Na	C24H42O21	33.4	0	-1.81807	C00182	Carbohydrates
13.83_703.2256m/z	703.226	13.8277	6''-O-alpha-D-Galactopyranosylciceritol	M+Na	C25H44O21	38.1	16.8	-1.70262	-	Carbohydrates
13.83_719.2211m/z	719.221	13.8277	Quinoline-3-carboxamides	2M+H	C21H14FN3O2	36.5	0	-0.302262	C11694	Other
13.83_721.2324m/z	721.232	13.8277	Fenofibrate	2M+H	C20H21ClO4	37.6	14.5	-0.794695	C07586	Benzene and derivatives
14.03_291.2319m/z	291.232	14.0334	Dihydrotestosterone	M+H	C19H30O2	38.1	5.17	0.0551531	C03917	Steroids
14.14_423.3257m/z	423.326	14.137	1alpha,25-dihydroxy-3-deoxyvitamin D3 / 1alpha,25-dihydroxy-3-deoxycholecalciferol	M+Na	C27H44O2	38.9	5.7	5.94023	-	Steroids
14.16_409.1882m/z	409.188	14.1576	L-Tryptophan	2M+H	C11H12N2O2	39	0.109	2.86052	C00078	Amino acids and derivatives
14.16_439.3214m/z	439.321	14.158	Dehydroergosterol	M+FA-H	C28H42O	51.5	63.1	-0.897311		Steroids
14.26_243.2106m/z	243.211	14.2607	3,6,9-Hexadecatriene	M+Na	C16H28	37.8	7.78	10.2122	-	Lipids
14.26_261.2211m/z	261.221	14.2607	6-[5]-ladderane-1-hexanol	M+H	C18H28O	44.7	29.7	-0.742845	-	Alcohols
14.26_335.2582m/z	335.258	14.2607	Tetrahydrodeoxycorticosterone	M+H	C21H34O3	41.1	14.3	0.284016	C13713	Steroids
14.26_349.1982m/z	349.198	14.2607	2R-HpOTrE	M+Na	C18H30O5	38.4	3.63	-1.125	-	Lipids
14.26_353.2683m/z	353.268	14.2607	Monolinolenin (9c,12c,15c)	M+H	C21H36O4	47.5	40.8	-0.856796	-	Lipids
14.56_455.3527m/z	455.353	14.5617	Oleanolic acid	M-H	C30H48O3	39	0	-0.74709	C17148	Triterpenoids
14.60_263.2367m/z	263.237	14.5973	6-[3]-ladderane-1-hexanol	M+H	C18H30O	43.2	21.1	-0.857337	-	Lipids
14.60_355.2832m/z	355.283	14.5973	1-Linoleoylglycerol	M+H	C21H38O4	42.3	23	-3.07082	-	Lipids
14.70_245.2261m/z	245.226	14.7005	3-Allyl-1-cyclohexene	2M+H	C9H14	47.7	47.2	-0.977341	-	Other
14.70_337.2735m/z	337.274	14.7005	Pregnanetriol	M+H	C21H36O3	43.6	22.1	-0.557448	-	Steroids
14.70_354.2764n	355.284	14.7005	2-Linoleoyl Glycerol	M+H, M+Na	C21H38O4	47.5	42.1	-1.74357	-	Lipids
14.70_653.2608m/z	653.261	14.7005	Dehydroisocoproporphyrin	M+H	C36H36N4O8	44.2	24.8	0.299739	-	Other
14.71_309.1671m/z	309.167	14.7073	S-(3-Methylbutanoyl)-dihydrolipoamide-E	M+NH4	C13H25NO2S2	37.6	0	2.17981	C05119	Lipids
15.00_609.2711m/z	609.271	14.9966	Harderoporphyrin	M+H	C35H36N4O6	48.6	48.1	0.608218	-	Other
15.07_339.2891m/z	339.289	15.0716	Glycidyl oleate	M+H	C21H38O3	39.5	9.47	-0.843809	C19426	Other
15.07_357.2992m/z	357.299	15.0716	Heneicosanedioic acid	M+H	C21H40O4	44	33.3	-2.09029	-	Lipids
15.11_429.1946m/z	429.195	15.11	Ptilosteroid B	M-H	C21H34O7S	42.9	27.9	-1.54524	-	Steroids
15.11_824.5438m/z	824.544	15.1129	PS(19:0/20:5(5Z,8Z,11Z,14Z,17Z))	M+H	C45H78NO10P	38.4	9.12	0.246913	-	Lipids
15.11_829.5077m/z	829.508	15.1129	Telithromycin	M+NH4	C43H65N5O10	40	4.17	0.856145	C12009	Carbohydrates
15.12_425.3771m/z	425.377	15.1198	24-isopropenyl-22E-dehydrocholesterol	M+H	C30H48O	37.5	1.53	-1.56419	-	Steroids
15.17_265.2524m/z	265.252	15.1748	9S,10R-Epoxy-6Z-octadecene	M+H	C18H32O	39	1.79	-0.913958	-	Lipids
15.18_269.1358m/z	269.136	15.1816	Dibutyl malate	M+Na	C12H22O5	46.3	39	-0.680579	-	Organic acids and derivatives
15.18_273.1307m/z	273.131	15.1816	Morellin	M+2H	C33H36O7	38.5	5.4	1.53246	C10085	Other
15.20_827.4928m/z	827.493	15.2024	Oligomycin B	M+Na	C45H72O12	36.6	0	1.50122	C11312	Other
15.35_425.3769m/z	425.377	15.3468	Beta-Amyrone	M+H	C30H48O	37.7	0.981	-2.13133	-	Carbohydrates
15.37_365.2684m/z	365.268	15.3743	alpha-Terpineol formate	2M+H	C11H18O2	39.6	0.883	-0.70711	-	Lipids
15.41_671.2710m/z	671.271	15.4087	Aspartylglycosamine	2M+H	C12H21N3O8	36	1.52	-2.95365	C04540	Carbohydrates
15.41_683.2455m/z	683.246	15.4087	PC(2:0/2:0)	2M+H	C12H24NO8P	32.9	0.053	-14.1573	-	Lipids
15.42_293.2473m/z	293.247	15.4224	9Z,11E,13E-Octadecatrienoic acid methyl ester	M+H	C19H32O2	41.2	9.55	-0.751622	-	Lipids
15.46_713.2560m/z	713.256	15.4637	Flowerone	2M+H	C20H20O6	39.8	19.3	-4.5452	-	Flavonoids
15.58_567.4195m/z	567.419	15.5801	Nigroxanthin	M+H	C40H54O2	39.8	9.5	-0.314359	-	Lipids
15.63_654.2700n	655.277	15.6282	Coproporphyrin III	M+H, M+Na	C36H38N4O8	34.5	0.272	1.61082	C05770	Other
15.75_295.2630m/z	295.263	15.7521	(E)-3,7-Dimethyl-2,6-octadienyl nonanoate	M+H	C19H34O2	38.9	0.673	-0.509153	-	Lipids
15.76_652.2898n	653.297	15.759	Haplophytine	M+H, M+Na	C37H40N4O7	42.7	19.7	0.142768		Other
15.90_651.4585m/z	651.458	15.9034	10-Nitrolinoleic acid	2M+H	C18H31NO4	38.8	5.2	0.8891	C13800	Lipids
18.08_546.3906n	547.398	18.0756	cholest-5,24-dien-3beta-ol 3-O-beta-D-glucopyranoside	M+H, M+Na	C33H54O6	37.2	1.93	-2.71562	-	Steroids
2.25_268.1040m/z	268.104	2.24652	Adenosine	M+H	C10H13N5O4	58.2	94.7	-0.202266	C00212	Other
3.28_259.1363m/z	259.136	3.28443	3'-O-methylbatatasin III	M+H	C16H18O3	34.7	1.63	13.156	C10271	Lipids
3.30_178.0862m/z	178.086	3.2982	5-[2H-Pyrrol-4-(3H)-ylidenemethyl]-2-furanmethanol	M+H	C10H11NO2	49.8	56.2	-0.502039	-	Other
3.48_596.2335m/z	596.233	3.48388	8-Acetoxypinoresinol 4-glucoside	M+NH4	C28H34O13	43.4	29.1	-0.506735	-	Lignans
3.55_418.1645m/z	418.165	3.54525	Latrunculin B	M+Na	C20H29NO5S	42.7	28.1	-3.36716	-	Other
3.57_496.1468m/z	496.147	3.57275	Isorhamnetin 4'-glucoside	M+NH4	C22H22O12	38.7	11	3.78026	-	Flavonoids
3.58_566.1230m/z	566.123	3.58188	Petunidin 3-(6''-acetylglucoside)	M+FA-H	C24H25O13+	38	7.11	-8.95979	-	Anthocyanins
3.59_522.1969m/z	522.197	3.59338	3-(3,4-dimethoxyphenyl)-7-methoxy-8-methyl-5-{[3,4,5-trihydroxy-6-(hydroxymethyl)oxan-2-yl]oxy}-4H-chromen-4-one	M+NH4	C25H28O11	44.9	27.3	-0.117267	-	Steroids
3.61_552.2072m/z	552.207	3.61403	3,4-Dihydroxychalcone 4-beta-L-arabinopyranosyl-(1->4)-galactoside	M+NH4	C26H30O12	40.8	18.4	-0.619594	-	Other
3.62_490.1697m/z	490.17	3.6209	Formononetin 7-O-(6''-acetylglcoside)	M+NH4	C24H24O10	42.9	28.5	-2.18718	-	Flavonoids
3.63_361.1135m/z	361.114	3.63003	Catalpol	M-H	C15H22O10	39.1	3.67	-1.32177	C09773	Terpenoids
3.65_478.1707m/z	478.171	3.64842	Wistin	M+NH4	C23H24O10	38.3	9.54	-0.225813	-	Flavonoids
3.66_430.1557m/z	430.156	3.66222	Cyflufenamid	M+NH4	C20H17F5N2O2	38.2	0	2.10991	C18516	Other
3.68_464.1567m/z	464.157	3.68285	Pueraria glycoside 3	M+NH4	C22H22O10	36.3	0.355	3.49307	-	Flavonoids
3.69_496.1807m/z	496.181	3.68973	Persiconin	M+NH4	C23H26O11	41.2	16.5	-1.2724	-	Flavonoids
3.71_452.1665m/z	452.166	3.71035	Haplopappin A	M+NH4	C25H22O7	36.9	19.7	-9.01896	-	Flavonoids
3.71_453.1737m/z	453.174	3.71035	Phenethyl rutinoside	M+Na	C20H30O10	41.5	14.1	1.37182	-	Carbohydrates
3.71_464.1893m/z	464.189	3.71035	5-Hydroxy-7,8-dimethoxyflavanone 5-rhamnoside	M+NH4	C23H26O9	38.5	7.39	-5.04355	-	Flavonoids
3.72_450.1959m/z	450.196	3.71723	Benzyl gentiobioside	M+NH4	C19H28O11	38	9.49	-2.55818	-	Carbohydrates
3.72_552.2073m/z	552.207	3.71723	Simmondsin 2'-ferulate	M+H	C26H33NO12	43.8	31.4	-0.514327	-	Phenylpropanoids
3.73_482.1745m/z	482.175	3.73098	5-Methyltetrahydrofolic acid	M+Na	C20H25N7O6	37.1	3.57	-2.94063	C00440	Other
3.73_510.1948m/z	510.195	3.73098	Okanin 3,4,3'-trimethyl ether 4'-glucoside	M+NH4	C24H28O11	39.8	11.6	-4.51712	-	Phenylpropanoids
3.74_466.1867m/z	466.187	3.73785	(E)-Squamosamide	M+H	C26H27NO7	35.5	1.1	1.4413	-	Phenylpropanoids
3.74_494.1661m/z	494.166	3.74473	Eupalitin 5-rhamnoside	M+NH4	C23H24O11	42.6	19.5	0.912039	-	Flavonoids
3.75_293.0874m/z	293.087	3.74697	1-O-(3R,4-dihydroxy-2-methylene-butanoyl)-beta-D-glucopyranose	M-H	C11H18O9	40.4	5.28	-1.22833	-	Lipids
3.77_492.1866m/z	492.187	3.77223	Luteolin 7,3'-dimethyl ether 5-glucoside	M+NH4	C24H26O10	38.1	1.81	0.386241		Flavonoids
3.77_549.2080m/z	549.208	3.77223	Alkaloid RC	M+NH4	C26H29NO11	39	0.0683	0.240999	-	Other
3.77_799.2302m/z	799.23	3.7676	Swertisin 4'-O-glucoside-2''-O-rhamnoside	M+FA-H	C34H42O19	41.4	28.2	0.0210032	-	Flavonoids
3.78_187.0631n	188.07	3.7791	3-Indoleacrylic acid	M+H, M+NH4	C11H9NO2	41.7	13	-1.16699	-	Other
3.78_386.0779n	387.085	3.7791	(7R)-7-(4-Carboxybutanamido)cephalosporanate	M+H, 2M+H	C15H18N2O8S	38.6	0.06	-1.31866	C15666	Organic acids and derivatives
3.79_448.1942m/z	448.194	3.78598	O-Desmethyltramadol glucuronide	M+Na	C21H31NO8	38.8	6.77	0.016709	-	Phenolic glycosides
3.79_480.1520m/z	480.152	3.78598	Tricin 7-xyloside	M+NH4	C22H22O11	36.7	2.13	4.1647	-	Flavonoids
3.79_771.2323m/z	771.232	3.79285	Isorhamnetin 3-O-[a-L-rhamnopyranosyl-(1->3)-a-L-rhamnopyranosyl-(1->6)-b-D-glucopyranoside]	M+H	C34H42O20	39.1	16.5	-2.46575	-	Flavonoids
3.81_272.0925m/z	272.093	3.80662	Hispidol	M+NH4	C15H10O4	39.1	12.6	3.09566	C08644	Flavonoids
3.84_311.0932m/z	311.093	3.84323	7-Methoxy-2-methylisoflavone	M+FA-H	C17H14O3	46.5	45.4	2.78573	-	Flavonoids
3.84_581.1504m/z	581.15	3.84098	Graveobioside A	M+H	C26H28O15	44.3	24.5	0.476418	-	Flavonoids
3.85_300.1208n	323.11	3.85473	4-Methoxybenzyl glucoside	M+H, M+NH4, M+Na	C14H20O7	39.6	3.19	-0.34272	-	Carbohydrates
3.86_121.0645m/z	121.065	3.86162	Styrene Oxide	M+H	C8H8O	47.9	46.4	-2.04922	C02083	Benzene and derivatives
3.86_187.0732m/z	187.073	3.86162	Eugenol	M+Na	C10H12O2	39.9	2.73	1.29985	C10453	Phenylpropanoids
3.86_205.0851m/z	205.085	3.86162	7-Ethoxy-4-methylcoumarin	M+H	C12H12O3	40.8	17.1	-4.19129	-	Phenylpropanoids
3.86_247.0964m/z	247.096	3.86162	PRENYLETIN	M+H	C14H14O4	41	13.2	-0.454181	-	Benzene and derivatives
3.86_329.0892m/z	329.089	3.86162	Bergenin	M+H	C14H16O9	35.9	5.68	7.56257	-	Phenylpropanoids
3.86_550.1905m/z	550.19	3.86162	Sesaminol glucoside	M+NH4	C26H28O12	40.6	16.6	-2.63937	-	Lignans
3.86_654.2395m/z	654.239	3.86162	Linoside B	M+NH4	C30H36O15	40.3	13.1	0.341372	-	Flavonoids
3.87_406.2068m/z	406.207	3.8685	Tuberonic acid glucoside	M+NH4	C18H28O9	37.2	3.18	-0.835929	C08558	Other
3.87_439.1384m/z	439.138	3.8685	(S)-F-Willardiine	2M+H	C7H10FN3O4	39.1	0	0.162789	C13671	Amino acids and derivatives
3.87_730.1780m/z	730.178	3.8685	Quercetin 3-(6''-malonylglucoside)-7-glucoside	M+NH4	C30H32O20	37.6	0.0179	-6.41396	-	Flavonoids
3.89_299.1133m/z	299.113	3.89135	Salidroside	M-H	C14H20O7	39.8	1.11	-1.14311	C06046	Phenolic glycosides
3.89_517.1791m/z	517.179	3.88912	3-Methyluridine	2M+H	C10H14N2O6	42.4	23.3	2.83508	-	Other
3.91_376.1364n	375.129	3.91203	Loganate	M-H, 2M-H	C16H24O10	38.8	0.284	-1.55943	C01512	Terpenoids
3.91_941.2934m/z	941.293	3.90515	10-formyldihydrofolate	2M-H	C20H21N7O7	37.5	0	0.227227	C03204	Lipids
3.92_130.0648m/z	130.065	3.92353	Isoquinoline	M+H	C9H7N	42.4	23.1	-2.28165	C06323	Other
3.92_320.1130m/z	320.113	3.92353	Hesperetin	M+NH4	C16H14O6	44.9	42.3	0.391788	C01709	Flavonoids
3.92_338.1235m/z	338.123	3.92353	1H-Indol-3-ylacetyl-myo-inositol	M+H	C16H19NO7	38.1	31.2	0.10243	C03868	Other
3.93_281.1389m/z	281.139	3.93265	12,13-Dimethyl-5,14-dioxabicyclo[9.2.1]-tetradeca-1(13),11-dien-4-one	M+FA-H	C14H20O3	39.9	5.25	-2.21368	-	Lipids
3.93_428.1919m/z	428.192	3.9304	Butyl 3-O-caffeoylquinate	M+NH4	C20H26O9	38	4.31	0.97194	-	Alcohols
3.94_442.2079m/z	442.208	3.93728	Taraxinic acid glucosyl ester	M+NH4	C21H28O9	38.2	3.21	1.77606	-	Lipids
3.94_494.1655m/z	494.165	3.94415	Isorhamnetin 5-glucoside	M+NH4	C23H24O11	44	23.1	-0.433962	-	Flavonoids
3.94_771.1982m/z	771.198	3.93953	Kaempferol 3-robinobioside-7-alpha-L-arabinofuranoside	M+FA-H	C32H38O19	41.3	21.9	-1.05519	-	Flavonoids
3.98_743.2016m/z	743.202	3.97853	Kaempferol 3-sophoroside-7-alpha-L-arabinofuranoside	M+H	C32H38O20	37.5	2.71	-1.7867	-	Flavonoids
3.98_873.2308m/z	873.231	3.98078	Isorhamnetin 3-[2''-(4'''-acetylrhamnosyl)-gentiobioside]	M+FA-H	C36H44O22	42.7	19.7	0.196589	-	Flavonoids
3.99_492.1503m/z	492.15	3.99228	Pelargonidin 3-(6''-acetylglucoside)	M+NH4	C23H22O11	38.9	0	0.601553		Anthocyanins
4.05_288.0868m/z	288.087	4.04677	Apigenin	M+NH4	C15H10O5	38.8	10.6	0.454372	C01477	Flavonoids
4.06_138.0549m/z	138.055	4.06052	Anthranilate	M+H	C7H7NO2	43.6	23.6	-0.549768	C00108	Benzene and derivatives
4.10_229.0858m/z	229.086	4.10178	Resveratrol	M+H	C14H12O3	42.1	22.5	-0.379021	C03582	Lipids
4.12_887.2453m/z	887.245	4.12318	Kaempferol 3-(2G-xylosylrutinoside)-7-glucoside	M-H	C38H48O24	40.7	24.1	-1.0597	-	Flavonoids
4.16_257.1382m/z	257.138	4.16382	2-[4-(3-Hydroxypropyl)-2-methoxyphenoxy]-1,3-propanediol	M+H	C13H20O5	38.5	1.32	-0.704292	-	Other
4.16_286.1435m/z	286.144	4.15695	Secodemethylclausenamide	M+H	C17H19NO3	40.2	9	-0.917905	-	Benzene and derivatives
4.16_441.1731m/z	441.173	4.16382	2-[4-(3-Hydroxypropyl)-2-methoxyphenoxy]-1,3-propanediol 1-glucoside	M+Na	C19H30O10	38.9	1.22	-0.0866578	-	Carbohydrates
4.18_127.0386m/z	127.039	4.17758	Allomaltol	M+H	C6H6O3	43.9	28.7	-2.70727		Alcohols
4.18_432.1267n	433.134	4.17758	Apiosylglucosyl 4-hydroxybenzoate	M+H, M+Na	C18H24O12	44	25.2	-0.160526	-	Carbohydrates
4.18_787.2292m/z	787.229	4.18445	Isorhamnetin 3-galactosyl-(1->4)-rhamnosyl-(1->6)-galactoside	M+H	C34H42O21	47.6	49.7	0.0948241	-	Flavonoids
4.21_522.2676n	540.301	4.20508	7,8-Dihydro-3b,6a-dihydroxy-alpha-ionol 9-[apiosyl-(1->6)-glucoside]	M+NH4, M+Na	C24H42O12	37.6	1.93	-0.0500341	-	Lipids
4.23_473.1655m/z	473.166	4.23327	Biopterin	2M-H	C9H11N5O3	38.6	0	0.935666	C06313	Other
4.25_785.2142m/z	785.214	4.25388	Sexangularetin 3-glucoside-7-rutinoside	M-H	C34H42O21	50.3	61.2	-0.434347	-	Flavonoids
4.26_857.2342m/z	857.234	4.26077	Genistein 7,4'-bis(O-glucosylapioside)	M-H	C37H46O23	43.8	36.8	-1.78423		Flavonoids
4.27_595.1658m/z	595.166	4.27383	Safflor Yellow A	M+H	C27H30O15	46.9	38.4	0.134422	-	Phenylpropanoids
4.34_207.0650m/z	207.065	4.34268	Vinyl caffeate	M+H	C11H10O4	48.9	54.3	-1.01838	-	Phenylpropanoids
4.34_579.1357m/z	579.136	4.33642	Rhamnazin 3-(6''-acetylglucoside)	M+FA-H	C25H26O13	51.1	58	0.25208	-	Flavonoids
4.34_593.1511m/z	593.151	4.33642	Daidzein 7-O-apiosyl-(1->6)-glucoside	M+FA-H	C26H28O13	53	69.1	-0.154867	-	Flavonoids
4.35_757.2185m/z	757.218	4.34957	Isorhamnetin 3-xylosyl-(1->3)-rhamnosyl-(1->6)-glucoside	M+H	C33H40O20	42.1	27	-0.115862	-	Flavonoids
4.35_778.2914m/z	778.291	4.34957	Epimedoside	M+NH4	C37H44O17	43	34	-0.326924	-	Flavonoids
4.36_355.1027m/z	355.103	4.36392	Gentiopicrin	M-H	C16H20O9	40.4	6.56	-2.085	C09782	Terpenoids
4.36_404.1542m/z	404.154	4.36332	1-O-Sinapoylglucose	M+NH4	C17H22O10	38.3	5.32	-2.41189	-	Phenylpropanoids
4.36_611.1610m/z	611.161	4.36332	Cyanin	M+H	C27H30O16	43.2	25.7	0.567861	C08639	Anthocyanins
4.37_175.0396m/z	175.04	4.3708	10-hydroxy-8E-Decene-2,4,6-triynoic acid	M-H	C10H8O3	41.2	11.3	-2.38293	-	Lipids
4.37_771.1989m/z	771.199	4.3708	Quercetin 3-glucosyl-(1->6)-glucosyl-(1->4)-rhamnoside	M-H	C33H40O21	46.5	34.9	-0.00690018		Flavonoids
4.40_385.1131m/z	385.113	4.39832	trans-isoeugenol-O-glucuronide	M+FA-H	C16H20O8	42.4	16.5	-2.81379	-	Phenolic glycosides
4.43_281.1029m/z	281.103	4.42582	Carboxy-ibuprofen	M+FA-H	C13H16O4	39.7	4.55	-0.775174	-	Phenylpropanoids
4.45_520.1455m/z	520.145	4.45273	6''-O-Malonyldaidzin	M+NH4	C24H22O12	39.9	16.2	0.997932	C16191	Flavonoids
4.46_406.1135m/z	406.114	4.4596	Urolithin B 3-O-glucuronide	M+NH4	C19H16O9	41.1	13.9	0.692066	-	Phenolic glycosides
4.47_337.0925m/z	337.093	4.47457	Phosphodimethylethanolamine	2M-H	C4H12NO4P	39.7	11	-2.8939	C13482	Organic acids and derivatives
4.53_329.1109n	347.145	4.53472	Dopamine glucuronide	M+NH4, M+Na	C14H19NO8	42	14.8	-0.589631	-	Phenolic glycosides
4.55_335.0769m/z	335.077	4.54835	5-O-Caffeoylshikimic acid	M-H	C16H16O8	42.8	20.6	-1.07688	C10434	Phenolic glycosides
4.56_627.1564m/z	627.156	4.56223	Delphinidin 3-gentiobioside	M+H	C27H30O17	40.8	9.86	1.24279		Anthocyanins
4.57_323.1246m/z	323.125	4.56898	Abyssinone II	M-H	C20H20O4	46.4	56	-13.3417	-	Flavonoids
4.62_265.1431m/z	265.143	4.61737	gamma-CEHC	M+H	C15H20O4	42.4	21.2	-1.14935	-	Other
4.62_640.2024m/z	640.202	4.62425	Kaempferol 7,4'-dimethyl ether 3-(6''-(E)-p-coumarylglucoside)	M+NH4	C32H30O13	48.9	53.8	-0.152734	-	Flavonoids
4.65_419.0973m/z	419.097	4.65177	Juglanin	M+H	C20H18O10	44.2	25.9	0.0882727	-	Flavonoids
4.65_565.1552m/z	565.155	4.65177	Apiin	M+H	C26H28O14	43.7	32	0.110851	C04858	Flavonoids
4.69_281.1390m/z	281.139	4.6859	4-Heptyloxybenzoic acid	M+FA-H	C14H20O3	39.2	0	-1.80842	C14274	Organic acids and derivatives
4.69_755.2044m/z	755.204	4.69278	Pelargonidin 3-(2G-xylosylrutinoside)	M+FA-H	C32H38O18	38.7	0	0.487406		Anthocyanins
4.73_563.1403m/z	563.14	4.73468	6-C-Xylosylluteolin 2''-O-rhamnoside	M-H	C26H28O14	50.1	55.8	-0.567421	-	Flavonoids
4.76_455.3157m/z	455.316	4.7618	Ceanothenic acid	M+H	C29H42O4	46.4	45.7	0.341798	-	Triterpenoids
4.76_456.1863m/z	456.186	4.7618	Cnidimol 7-glucoside	M+NH4	C21H26O10	40.9	17.5	-0.35706	-	Phenolic glycosides
4.76_566.2484m/z	566.248	4.7618	Vapreotide	M+2H	C57H70N12O9S2	37.7	19.7	-0.648501	-	Other
4.77_302.1234m/z	302.123	4.76868	D-Vacciniin	M+NH4	C13H16O7	39.4	5.73	0.0346582	-	Benzene and derivatives
4.80_735.2136m/z	735.214	4.80347	5-O-Feruloylquinic acid	2M-H	C17H20O9	37.8	0	-0.76245	C02572	Organic acids and derivatives
4.84_469.2951m/z	469.295	4.84442	Pinnasterol	M+Na	C27H42O5	37.4	4.78	5.83953	-	Steroids
4.84_515.3003m/z	515.3	4.84442	Ganoderenic acid A	M+H	C30H42O7	41	12	-0.0212345	-	Triterpenoids
4.87_503.1911m/z	503.191	4.86505	Phellodensin F	M+H	C26H30O10	40.2	16.5	-0.112882	-	Phenolic glycosides
4.89_771.1985m/z	771.199	4.89288	Kaempferol 3-xylosyl-(1->3)-rhamnosyl-(1->6)-galactoside	M+FA-H	C32H38O19	49.4	61.3	-0.535823	-	Flavonoids
4.92_794.1007m/z	794.101	4.9204	Formyl-CoA	M-H	C22H36N7O17P3S	35.2	0	-2.73454	C00798	Other
4.94_484.1820m/z	484.182	4.94077	Agnuside	M+NH4	C22H26O11	40.2	12.2	1.43945	-	Lipids
4.94_712.3670n	711.36	4.94103	digitalin	M-H, M+FA-H	C36H56O14	51.3	60.9	-0.0581728	C08862	Steroids
4.98_639.1928m/z	639.193	4.97542	4,2'-Dihydroxy-4',6'-dimethoxychalcone 4-apiosyl-(1->2)-glucoside	M+FA-H	C28H34O14	45.6	33.2	-0.38703	-	Phenylpropanoids
5.01_859.1246m/z	859.125	5.01468	CMP-2-aminoethylphosphonate	2M-H	C11H20N4O10P2	36.6	0	1.12173	C05673	Other
5.02_739.1725m/z	739.173	5.02155	Quercetin 3-(3'',4''-diacetylrhamnosyl)-(1->6)-glucoside	M+FA-H	C31H34O18	51.9	87.3	-0.307107	-	Flavonoids
5.03_534.1606m/z	534.161	5.02963	2'',3''-Diacetylcosmosiin	M+NH4	C25H24O12	48.7	51.1	-0.0279451	-	Flavonoids
5.03_696.2142m/z	696.214	5.02963	Kaempferol 3-(4'',6''-diacetylglucoside)-7-rhamnoside	M+NH4	C31H34O17	38.8	7.5	1.08112	-	Flavonoids
5.04_771.1990m/z	771.199	5.04218	Schaftoside 6''-O-glucoside	M+FA-H	C32H38O19	44.3	33.8	0.159329	-	Flavonoids
5.08_640.1645n	641.172	5.07778	Ranupenin 3-rutinoside	M+H, M+Na	C28H32O17	44.8	29.8	0.888545	-	Flavonoids
5.11_299.1134m/z	299.113	5.11095	methyl 4-[2-(2-formyl-vinyl)-3-hydroxy-5-oxo-cyclopentyl]-butanoate	M+FA-H	C13H18O5	42.9	19.7	-0.746527	-	Lipids
5.13_179.0558m/z	179.056	5.13158	Allose	M-H	C6H12O6	39.6	6.06	-1.77576	C01487	Carbohydrates
5.19_301.0343m/z	301.034	5.1947	EMODIC ACID	M+H	C15H8O7	40.8	21.4	0.17642	-	Organic acids and derivatives
5.19_359.1124m/z	359.112	5.1947	5,8-Dihydroxy-3-(4-hydroxybenzyl)-7-methoxy-4-chromanone 8-acetate	M+H	C19H18O7	43	19	-0.312485	-	Phenylpropanoids
5.19_449.1079m/z	449.108	5.18783	Quercitrin	M+H	C21H20O11	52.8	76.8	0.152392	C01750	Flavonoids
5.19_607.1306m/z	607.131	5.1936	Quercetin 3-[6''-(3-hydroxy-3-methylglutaryl)galactoside]	M-H	C27H28O16	49.1	59.6	0.167889	-	Flavonoids
5.19_611.1609m/z	611.161	5.18783	Rutin	M+H	C27H30O16	46.7	37.5	0.330172	C05625	Flavonoids
5.20_341.1017m/z	341.102	5.20158	1-(2H-1,3-benzodioxol-5-yl)-3-hydroxy-3-(4-methoxy-1-benzofuran-5-yl)propan-1-one	M+H	C19H16O6	40.2	16.7	-0.705132	-	Phenylpropanoids
5.20_553.1925m/z	553.193	5.20048	gibberellin A3 O-beta-D-glucoside	M+FA-H	C25H32O11	40	9.15	-0.256485	C04070	Lipids
5.21_612.2047n	611.197	5.21423	NEOHESPERIDIN DIHYDROCHALCONE	M-H, M+FA-H	C28H36O15	40.6	12.3	-1.21504	-	Phenolic glycosides
5.24_287.0548m/z	287.055	5.24292	Maritimetin	M+H	C15H10O6	37.3	0.968	-0.645603	C08720	Phenylpropanoids
5.24_727.2085m/z	727.209	5.24292	Kaempferol 3-(2G-apiosylrobinobioside)	M+H	C32H38O19	44.3	29.4	0.747985	-	Flavonoids
5.25_367.1032m/z	367.103	5.24862	3-O-Feruloylquinic acid	M-H	C17H20O9	52.9	71.8	-0.822605	C02572	Alcohols
5.28_193.0504m/z	193.05	5.27612	Ferulate	M-H	C10H10O4	38.8	0.788	-1.26557	C01494	Phenolic glycosides
5.28_519.2958m/z	519.296	5.28418	Corchoroside B	M+H	C29H42O8	37.5	1.09	1.00659	-	Steroids
5.28_565.3011m/z	565.301	5.28418	Oxyhumulinic acid	2M+H	C15H22O5	39.8	6.43	0.699627	-	Other
5.28_609.1459m/z	609.146	5.283	Kaempferol 3-xylosyl-(1->2)-rhamnoside	M+FA-H	C26H28O14	47.9	40.5	-0.412337	-	Flavonoids
5.29_433.1132m/z	433.113	5.29105	Vitexin	M+H	C21H20O10	46.6	41.2	0.55621	C01460	Flavonoids
5.29_499.3055m/z	499.306	5.29105	PG(17:0/0:0)	M+H	C23H47O9P	42.9	25.2	4.94406	-	Lipids
5.32_537.1607m/z	537.161	5.31855	5,4'-Dihidroxy-7,8,2',3'-tetramethoxy flavone 5-glucoside	M+H	C25H28O13	43	27.1	0.770451	-	Flavonoids
5.40_465.1031m/z	465.103	5.40108	Hyperoside	M+H	C21H20O12	57.3	93.4	0.770708	C10073	Flavonoids
5.50_287.0548m/z	287.055	5.49755	3,5-dihydroxy-2-[(2E)-3-(4-hydroxyphenyl)prop-2-enoyl]cyclohexa-2,5-diene-1,4-dione	M+H	C15H10O6	40.9	10.8	-0.769101	-	Phenylpropanoids
5.50_463.0878m/z	463.088	5.4963	Quercetin 3-O-glucoside	M-H	C21H20O12	48	43.9	-0.865608	C05623	Flavonoids
5.56_595.1661m/z	595.166	5.55888	6-Nitrobenzo[a]pyrene	2M+H	C20H11NO2	39.1	0	1.38006	C19472	Benzene and derivatives
5.56_636.3536m/z	636.354	5.55888	Indinavir	M+Na	C36H47N5O4	37.1	0	2.62756	C07051	Amino acids and derivatives
5.60_987.4804m/z	987.48	5.60435	deslanoside	M+FA-H	C47H74O19	36.6	0	-0.201871	C12669	Carbohydrates
5.61_640.2239m/z	640.224	5.6139	Scutellarein 7,4'-dimethyl ether 6-rhamnosyl-(1->2)-glucoside	M+NH4	C29H34O15	44.1	26.9	0.484185	-	Flavonoids
5.63_623.1619m/z	623.162	5.63187	Pelargonidin 3-robinobioside	M+FA-H	C27H30O14	38.1	0	0.203484	-	Anthocyanins
5.65_521.3116m/z	521.312	5.6525	(-)-Asbestinine 2	M+FA-H	C28H44O6	48.9	53.4	-0.730968		Amino acids and derivatives
5.74_551.1767m/z	551.177	5.7419	4,6,2',4'-Tetramethoxychalcone 2'-beta-glucoside	M+FA-H	C25H30O11	37.9	2.84	-0.606775	-	Phenylpropanoids
5.74_854.1216m/z	854.122		Acetyl-CoA	M+FA-H	C23H38N7O17P3S	35.9	0	-2.98974	C00024	Other
5.83_449.1077m/z	449.108	5.82715	Astragalin	M+H	C21H20O11	57.3	93.9	-0.215482	C12249	Flavonoids
5.83_595.1658m/z	595.166	5.82715	Kaempferol-7-O-neohesperidoside	M+H	C27H30O15	57	89.6	0.103102	-	Flavonoids
5.88_375.1436m/z	375.144	5.88223	2-[4,6-dihydroxy-2-methoxy-3-(3-methylbut-2-en-1-yl)phenyl]-1-(2,4,5-trihydroxyphenyl)ethan-1-one	M+H	C20H22O7	41.1	18.6	-0.647045	-	Phenylpropanoids
5.88_463.1596m/z	463.16	5.88223	Cyrtopterin	M+H	C23H26O10	41.6	15.5	-0.680781	-	Flavonoids
5.92_449.1782m/z	449.178	5.91662	11,13-Dihydrotaraxinic acid glucosyl ester	M+Na	C21H30O9	38.2	3.02	0.0903616		Lipids
5.93_479.1187m/z	479.119	5.93038	Petunidin 3-galactoside	M+H	C22H22O12	51.8	66.1	0.661866	-	Anthocyanins
5.94_303.0497m/z	303.05	5.94413	Quercetin	M+H	C15H10O7	50.5	55.9	-0.693243	C00389	Flavonoids
5.94_625.1769m/z	625.177	5.93725	Narcissin	M+H	C28H32O16	51.9	66.2	0.942075	-	Flavonoids
5.95_273.0969m/z	273.097	5.951	Arbutin	M+H	C12H16O7	40.2	11	0.219554	C06186	Phenolic glycosides
5.95_727.1871m/z	727.187	5.951	Cyanidin 3-(6''-p-coumarylsambubioside)	M+H	C35H34O17	38.3	1.11	0.306928	-	Anthocyanins
5.99_461.1449m/z	461.145	5.98945	Andrographidin A	M-H	C23H26O10	46.6	36.2	-0.970625	-	Flavonoids
5.99_535.1807m/z	535.181	5.98945	5-Hydroxy-7,4'-dimethoxy-6,8-di-C-prenylflavanone 5-O-galactoside	M+FA-H	C25H30O10	40.2	17.3	-2.88624	-	Flavonoids
6.03_317.0655m/z	317.065	6.033	Isorhamnetin	M+H	C16H12O7	51	58.5	-0.38389	C10084	Flavonoids
6.03_924.1408m/z	924.141	6.02612	4-Hydroxyphenylacetyl-CoA	M+Na	C29H42N7O18P3S	35.2	0	-0.487485	C05338	Lipids
6.04_623.1614m/z	623.161	6.03562	Kaempferol 3-rhamnoside-(1->2)-rhamnoside	M+FA-H	C27H30O14	54.7	76.3	-0.675685	-	Flavonoids
6.05_501.3218m/z	501.322	6.04675	1-Hydroxyacorenone	2M+H	C15H22O3	39	0.735	1.49313	-	Other
6.06_287.0549m/z	287.055	6.0605	Fisetin	M+H	C15H10O6	41.3	11.5	-0.519097	C10041	Flavonoids
6.13_177.0190m/z	177.019	6.13227	7,8-Dihydroxycoumarin	M-H	C9H6O4	47.6	42.7	-2.12654	-	Phenylpropanoids
6.13_537.1969m/z	537.197	6.12935	8-Hydroxypinoresinol 4-glucoside	M+H	C26H32O12	39.6	6.03	0.495697	-	Lignans
6.14_375.1439m/z	375.144	6.13622	6-C-(3-Hydroxyisopentyl)eriodictyol	M+H	C20H22O7	40.8	16.1	0.289407	-	Flavonoids
6.14_623.1614m/z	623.161	6.13913	RHOIFOLIN	M+FA-H	C27H30O14	39.7	0	-0.629758	C12627	Flavonoids
6.15_303.0498m/z	303.05	6.14998	3,7,3',4',5'-Pentahydroxyflavone	M+H	C15H10O7	52.7	66.4	-0.267072	-	Flavonoids
6.17_467.3156m/z	467.316	6.1706	PRISTIMEROL	M+H	C30H42O4	41.6	12.9	0.0372407		Phenolic glycosides
6.17_827.4432m/z	827.443	6.1706	Medicagenic acid beta-maltoside	M+H	C42H66O16	42.7	31.2	0.959142	-	Triterpenoids
6.17_973.5015m/z	973.501	6.1706	28-Glucosylarjunolate 3-[rhamnosyl-(1->3)-glucuronide]	M+H	C48H76O20	41.7	25.5	1.2347	-	Terpenoids
6.18_665.3900m/z	665.39	6.17748	Medicagenic acid 3-O-beta-D-glucoside	M+H	C36H56O11	43.8	35.1	0.750907	-	Triterpenoids
6.18_811.4481m/z	811.448	6.17748	15-Oxo-21-hydroxymabiogenin 3-[rhamnosyl-(1->6)-glucoside]	M+H	C42H66O15	42.9	30.9	0.797769	-	Other
6.24_535.1814m/z	535.181	6.24228	5-Hydroxy-6,7,3',4',5'-pentamethoxyflavanone 5-O-rhamnoside	M-H	C26H32O12	41.3	13	-1.33636	-	Flavonoids
6.26_301.0349m/z	301.035	6.25603	Hypolaetin	M-H	C15H10O7	54.4	80.8	-1.68158	C10078	Flavonoids
6.26_445.0772m/z	445.077	6.26292	3,5,7,4'-Tetrahydroxy-8-C-(3-methylsuccinoyl)flavone	M+FA-H	C20H16O9	40.4	13.7	-1.03198	-	Flavonoids
6.32_857.4173m/z	857.417	6.31793	thevetin B	M-H	C42H66O18	38.7	0	-0.34941	C08856	Steroids
6.40_313.1432m/z	313.143	6.4046	Honyudisin	M+H	C19H20O4	41	19.2	-0.606612	-	Phenylpropanoids
6.40_540.2441m/z	540.244	6.4046	Isolariciresinol 9-O-beta-D-glucoside	M+NH4	C26H34O11	46.5	45.9	0.252079	-	Lignans
6.41_435.1650m/z	435.165	6.41148	Vestitone 7-glucoside	M+H	C22H26O9	44.6	37.7	-0.00526938	-	Flavonoids
6.43_505.2644m/z	505.264	6.4321	(3S,7E,9R)-4,7-Megastigmadiene-3,9-diol 9-[apiosyl-(1->6)-glucoside]	M+H	C24H40O11	40.3	14.5	0.130229	-	Lipids
6.44_191.1430m/z	191.143	6.43898	2,2,6,7-Tetramethylbicyclo[4.3.0]nona-1(9),4-dien-8-one	M+H	C13H18O	42.2	19.2	-0.427703	-	Other
6.45_133.1010m/z	133.101	6.44587	3,4-Dimethylstyrene	M+H	C10H12	44.6	30.8	-1.33808	-	Benzene and derivatives
6.45_137.0959m/z	137.096	6.44587	4-Propylphenol	M+H	C9H12O	41.2	15.2	-1.2864	C14311	Benzene and derivatives
6.52_521.2024m/z	521.202	6.5223	2-Methoxyestrone 3-glucuronide	M+FA-H	C25H32O9	51.8	61.4	-0.962413	C11132	Steroids
6.53_401.1595m/z	401.16	6.52792	Brevicornin	M+H	C22H24O7	40.6	11.4	0.0699768	-	Flavonoids
6.53_418.1621m/z	418.162	6.52792	Lophirone J	M+NH4	C25H20O5	37.7	11.3	-6.99624		Phenolic glycosides
6.53_516.1268n	517.134	6.5348	1,3-Dicaffeoylquinic acid	M+H, M+Na	C25H24O12	50.2	55.1	0.00789633	C10445	Organic acids and derivatives
6.53_580.2159n	603.205	6.52792	(+)-7-epi-Syringaresinol 4'-glucoside	M+NH4, M+Na	C28H36O13	38.2	6.4	0.519597	-	Lignans
6.53_595.2033m/z	595.203	6.52918	2-Phenylethanol glucuronide	2M-H	C14H18O7	45.3	36.1	0.0939641		Carbohydrates
6.54_337.0917m/z	337.092	6.54168	4-Caffeoyl-1,5-quinolactone	M+H	C16H16O8	46.3	37.6	-0.156913	-	Phenylpropanoids
6.54_355.1025m/z	355.103	6.54168	Chlorogenic acid	M+H	C16H18O9	48.6	53.7	0.463291	C00852	Phenolic glycosides
6.54_515.1172m/z	515.117	6.54168	3',4',5-Trihydroxy-3,7-dimethoxyflavone 5-glucoside	M+Na	C23H24O12	44.4	40.8	2.49569	-	Flavonoids
6.55_461.1448m/z	461.145	6.54982	3,7-Dihydroxy-2-[4-hydroxy-3-(4-hydroxy-3-methylbutyl)phenyl]-5,6-dimethoxy-4H-1-benzopyran-4-one	M+FA-H	C22H24O8	46.9	36.7	-1.31691	-	Flavonoids
6.58_325.1431m/z	325.143	6.57607	Phaseollinisoflavan	M+H	C20H20O4	47.9	51.1	-1.09885	C10515	Flavonoids
6.59_331.1540m/z	331.154	6.58983	Gibberellin A88	M+H	C19H22O5	42.9	28.1	-0.0451402	-	Lipids
6.60_506.2723n	551.27	6.59795	geodisterol-O-sulfite	M-H, M+FA-H	C28H42O6S	40	17.1	4.13277	-	Steroids
6.62_533.3119m/z	533.312	6.61858	Cucurbitacin H	M-H	C30H46O8	39.1	1.52	-0.236026	C08799	Triterpenoids
6.63_579.2084m/z	579.208	6.63233	3,4,7-Trihydroxy-5-methoxy-8-prenylflavan 7-O-beta-D-glucopyranoside	M+FA-H	C27H34O11	45.6	32.5	0.106866	-	Flavonoids
6.65_693.2043m/z	693.204	6.65305	Embigenin 2''-(2'''-acetylrhamnoside)	M+FA-H	C31H36O15	42.9	30.1	0.990824		Flavonoids
6.66_134.0364n	179.035	6.65993	Phthalide	M-H, M+FA-H	C8H6O2	43	19.2	-2.75482	C09921	Other
6.66_173.0452m/z	173.045	6.65993	Shikimic acid	M-H	C7H10O5	42	16.1	-2.22431	C00493	Alcohols
6.66_177.0189m/z	177.019	6.65993	ESCULETIN	M-H	C9H6O4	40.7	9.75	-2.30684	C09263	Phenylpropanoids
6.66_333.0614m/z	333.061	6.65993	3,4,2',4',alpha-Pentahydroxychalcone	M+FA-H	C15H12O6	44.8	40.5	-0.733741	-	Phenylpropanoids
6.66_349.0561m/z	349.056	6.65993	Pentahydroxyflavanone	M+FA-H	C15H12O7	37.7	0	-1.18102	C05911	Flavonoids
6.66_468.1054n	513.103	6.65993	Epigallocatechin 3-O-caffeate	M-H, M+FA-H	C24H20O10	43.3	25.5	-0.584516	-	Flavonoids
6.67_290.0786n	335.077	6.6668	Epicatechin	M-H, M+FA-H	C15H14O6	45.1	29.8	-1.41217	C09727	Flavonoids
6.67_365.0512m/z	365.051	6.6668	Dihydromyricetin	M+FA-H	C15H12O8	36.7	0	-0.69603	C02906	Flavonoids
6.80_599.1983m/z	599.198	6.80435	Osthenol-7-O-beta-D-gentiobioside	M+FA-H	C26H34O13	38.8	0	0.328933	C17476	Carbohydrates
6.81_355.1172m/z	355.117	6.80995	Sesamin	M+H	C20H18O6	46.3	42.7	-1.22455	C10882	Lignans
6.91_355.1172m/z	355.117	6.90622	Albanin A	M+H	C20H18O6	42.4	20.2	-1.1191	-	Flavonoids
6.95_300.1229m/z	300.123	6.94748	N-trans-p-Coumaroyloctopamine	M+H	C17H17NO4	52.6	69.1	-0.31477	-	Phenylpropanoids
6.95_462.1759m/z	462.176	6.94748	Volubilin	M+NH4	C23H24O9	42.2	16.3	0.174085	-	Flavonoids
6.97_469.3311m/z	469.331	6.96812	Dehydrocurdione	2M+H	C15H22O2	40	1.74	-0.227356	C16949	Lipids
6.99_447.0931m/z	447.093	6.99033	petunidin-3-O-arabinoside	M-H	C21H20O11	38.9	3.27	-0.340438	-	Anthocyanins
7.02_287.0549m/z	287.055	7.0227	Datiscetin	M+H	C15H10O6	43.7	21.9	-0.433528	C10036	Flavonoids
7.02_433.1130m/z	433.113	7.0227	Kaempferol 4'-rhamnoside	M+H	C21H20O10	42.9	23.9	0.227553	-	Flavonoids
7.03_521.1663m/z	521.166	7.02958	Matteucinol 7-O-glucoside	M+FA-H	C24H28O10	47.4	41.1	-0.313686		Flavonoids
7.03_623.1615m/z	623.162	7.02958	Patuletin 7-[6''-(2-methylbutyryl)-glucoside]	M+FA-H	C27H30O14	49.1	46.7	-0.43625	-	Anthocyanins
7.13_285.0401m/z	285.04	7.12597	Kaempferol	M-H	C15H10O6	54.8	80.9	-1.31748	C05903	Flavonoids
7.13_431.0980m/z	431.098	7.13285	Afzelin	M-H	C21H20O10	46.8	36.9	-0.959436	C16911	Flavonoids
7.19_453.3003m/z	453.3	7.18775	DIHYDROCELASTROL	M+H	C29H40O4	40.9	17.7	0.887392		Terpenoids
7.19_471.3106m/z	471.311	7.18775	(3beta,17alpha,23S)-17,23-Epoxy-3,29-dihydroxy-27-norlanosta-7,9(11)-diene-15,24-dione	M+H	C29H42O5	48.6	51.8	0.223918	-	Steroids
7.19_499.3056m/z	499.306	7.18775	Cucurbitacin S	M+H	C30H42O6	46.4	39.4	0.439436	C08806	Terpenoids
7.19_535.3267m/z	535.327	7.18775	Ganoderic acid L	M+H	C30H46O8	42	23.1	0.266603	-	Flavonoids
7.19_679.3698m/z	679.37	7.19473	Pandaroside B	M+FA-H	C35H54O10	54	74.2	-0.128051	-	Carbohydrates
7.22_317.0654m/z	317.065	7.22213	Tamarixetin	M+H	C16H12O7	57.1	88.8	-0.448395	C10188	Flavonoids
7.23_463.1238m/z	463.124	7.22902	6-Methoxykaempferol 3-rhamnoside	M+H	C22H22O11	47.7	42.6	0.577724	-	Flavonoids
7.28_273.0756m/z	273.076	7.27722	Naringenin	M+H	C15H12O5	37.2	0	-0.393127	C00509	Flavonoids
7.35_461.1085m/z	461.109	7.3461	malvidin-3-O-arabinoside	M-H	C22H22O11	42.5	15.1	-0.86683	-	Anthocyanins
7.35_513.1392m/z	513.139	7.34598	6-Hydroxykaempferol 3,6-dimethyl ether 7-glucoside	M+Na	C24H26O11	40.9	22.1	5.02393	-	Flavonoids
7.46_529.1347m/z	529.135	7.46315	Luteolin 3'-methyl ether 7-(6''-crotonylglucoside)	M-H	C26H26O12	41.1	10.5	-0.835871	-	Flavonoids
7.48_455.3518m/z	455.352	7.48352	Glypallidifloric acid	M+H	C30H46O3	46.6	42.5	-0.427487	-	Triterpenoids
7.48_473.3625m/z	473.362	7.48352	Sumaresinolic acid	M+H	C30H48O4	49.4	56.3	-0.131346	-	Other
7.52_491.1557m/z	491.156	7.51617	4,2'-Dihydroxy-3,4',6'-trimethoxychalcone 4-glucoside	M-H	C24H28O11	39.3	5.63	-0.341041	-	Phenylpropanoids
7.59_483.3107m/z	483.311	7.59308	24-Nor-9,11-seco-11-acetoxy-3,6-dihydroxycholest-7,22-dien-9-one	M+Na	C28H44O5	36.9	0.473	5.65574	-	Steroids
7.59_501.3214m/z	501.321	7.59308	(+)-Armillarin	2M+H	C15H22O3	47.6	47.1	0.681859	-	Other
7.59_519.3323m/z	519.332	7.59308	Corosin	M+H	C30H46O7	40.2	15.1	1.3389	-	Triterpenoids
7.76_795.4176m/z	795.418	7.76383	diginatin	M-H	C41H64O15	42	25.6	0.4223	C08861	Steroids
7.77_485.3261m/z	485.326	7.77187	21-Hydroxyisoglabrolide	M+H	C30H44O5	55.7	84.3	-0.0267692	-	Triterpenoids
7.77_503.3367m/z	503.337	7.77187	22-Deoxocucurbitacin D	M+H	C30H46O6	53.6	77	-0.0669966	-	Steroids
7.77_572.2482m/z	572.248	7.77187	Yessotoxin	M+2H	C55H82O21S2	33.5	2.59	2.44129	C16872	Other
7.77_649.3947m/z	649.395	7.77187	2a-Hydroxygypsogenin 3-O-b-D-glucoside	M+H	C36H56O10	50.1	57.6	0.104906	-	Terpenoids
8.06_599.3585m/z	599.359	8.0603	Trillin	M+Na	C33H52O8	44.9	36.1	5.36048	-	Steroids
8.07_187.1479m/z	187.148	8.07405	7-Ethyl-5,6-dihydro-1,4-dimethylazulene	M+H	C14H18	50.7	64.6	-1.13884		Other
8.07_524.0825m/z	524.082	8.06718	Cefditoren	M+NH4	C19H18N6O5S3	36.8	4.88	-2.79091	-	Other
8.07_583.3634m/z	583.363	8.06718	Vitamin D3 glucosiduronate	M+Na	C33H52O7	42.4	30.2	5.12043	-	Steroids
8.07_635.3797m/z	635.38	8.07405	Cholestane-3,7,12,25-tetrol-3-glucuronide	M+Na	C33H56O10	41.2	16.5	5.13118		Steroids
8.07_781.4371m/z	781.437	8.06718	Cynarasaponin F	M+H	C41H64O14	43.1	21.2	0.294455	-	Terpenoids
8.07_797.4325m/z	797.432	8.07405	Pandaroside A	M+H	C41H64O15	40.6	8.92	0.870728	-	Carbohydrates
8.07_943.4904m/z	943.49	8.06718	Phytolaccoside I	M+H	C47H74O19	42.3	17.4	0.756593	-	Triterpenoids
8.08_913.4798m/z	913.48	8.08093	Medicagenic acid 28-O-[b-D-xylosyl-(1->4)-a-L-rhamnosyl-(1->2)-a-L-arabinosyl] ester	M+H	C46H72O18	43.4	30.4	0.733554		Triterpenoids
8.11_809.4334m/z	809.433	8.11255	digitoxin	M+FA-H	C41H64O13	36.6	0.118	0.637055	C06955	Steroids
8.15_971.4852m/z	971.485	8.14695	Chikusetsusaponin Ib	M+FA-H	C47H74O18	38.4	0	-0.57364	C17545	Triterpenoids
8.18_471.3115m/z	471.312	8.18133	(22E,24E)-1alpha,25-dihydroxy-22,23,24,24a-tetradehydro-24a-homovitamin D3 / (22E,24E)-1alpha,25-dihydroxy-22,23,24,24a-tetradehydro-24a-homocholecalciferol	M+FA-H	C28H42O3	38.5	0.388	-0.217432	-	Steroids
8.31_571.2032m/z	571.203	8.30513	Salicin	2M-H	C13H18O7	38.7	2.36	-0.067534	C01451	Phenolic glycosides
8.36_517.3165m/z	517.316	8.363	Ganoderic acid delta	M+H	C30H44O7	48.3	51.4	0.923456	-	Triterpenoids
8.61_663.3749m/z	663.375	8.60583	2alpha,7beta,15beta,18-tetraacetoxy-cholest-5-en-3alpha-ol	M+FA-H	C35H54O9	55.4	80.8	-0.0898965		Steroids
9.04_415.1749m/z	415.175	9.03605	Laxiflorin	M+H	C23H26O7	36.2	4.98	-0.483362	-	Flavonoids
9.28_913.5157m/z	913.516	9.27693	Soyasaponin II	M+H	C47H76O17	45.5	46	0.243233	C12081	Terpenoids
9.34_685.4165m/z	685.417	9.33977	Mosesin 4	M+FA-H	C35H60O10	38.1	0	-0.481055	C17024	Steroids
9.48_637.4220m/z	637.422	9.47645	Glycopyrrolate	2M+H	C19H28NO3+	37.4	0.202	1.37891	-	Benzene and derivatives
9.48_978.5044m/z	978.504	9.47645	Fucalpha1-2Galbeta1-3GalNAcbeta1-4(NeuAcalpha2-8NeuAcalpha2-3)Galbeta1-4Glcbeta-Cer(d18:1/16:0)	M+2H	C88H154N4O43	34.7	0.368	-2.25741	-	Lipids
9.48_995.4648m/z	995.465	9.47645	PIP2(16:2(9Z,12Z)/18:0)	M+H	C43H81O19P3	30.6	0.0198	-0.958785	C00626	Lipids
9.59_617.3689m/z	617.369	9.59282	Avermectin A2a aglycone	M+H	C35H52O9	45.8	42	0.792081	C11971	Carbohydrates
9.59_941.4754m/z	941.475	9.59282	Melilotussaponin O2	M+H	C47H72O19	41.1	19.9	1.39215	-	Triterpenoids
9.63_463.1835m/z	463.183	9.6272	Diferuloylputrescine	M+Na	C24H28N2O6	38.9	9.47	-1.11726	-	Phenylpropanoids

## Sheet: G vs T
Compound	m/z	Retention time (min)	Accepted Description	Adducts	Formula	Score	Fragmentation Score	Mass Error (ppm)	KEGG
9.59_617.3689m/z	617.369	9.59282	Avermectin A2a aglycone	M+H	C35H52O9	45.8	42	0.792081	C11971
9.48_995.4648m/z	995.465	9.47645	PIP2(16:2(9Z,12Z)/18:0)	M+H	C43H81O19P3	30.6	0.0198	-0.958785	C00626
8.31_571.2032m/z	571.203	8.30513	Salicin	2M-H	C13H18O7	38.7	2.36	-0.067534	C01451
8.11_809.4334m/z	809.433	8.11255	digitoxin	M+FA-H	C41H64O13	36.6	0.118	0.637055	C06955
7.76_795.4176m/z	795.418	7.76383	diginatin	M-H	C41H64O15	42	25.6	0.4223	C08861
7.28_273.0756m/z	273.076	7.27722	Naringenin	M+H	C15H12O5	37.2	0	-0.393127	C00509
7.13_431.0980m/z	431.098	7.13285	Afzelin	M-H	C21H20O10	46.8	36.9	-0.959436	C16911
7.13_285.0401m/z	285.04	7.12597	Kaempferol	M-H	C15H10O6	54.8	80.9	-1.31748	C05903
7.02_287.0549m/z	287.055	7.0227	Datiscetin	M+H	C15H10O6	43.7	21.9	-0.433528	C10036
6.97_469.3311m/z	469.331	6.96812	Dehydrocurdione	2M+H	C15H22O2	40	1.74	-0.227356	C16949
6.58_325.1431m/z	325.143	6.57607	Phaseollinisoflavan	M+H	C20H20O4	47.9	51.1	-1.09885	C10515
6.52_521.2024m/z	521.202	6.5223	2-Methoxyestrone 3-glucuronide	M+FA-H	C25H32O9	51.8	61.4	-0.962413	C11132
6.45_137.0959m/z	137.096	6.44587	4-Propylphenol	M+H	C9H12O	41.2	15.2	-1.2864	C14311
6.32_857.4173m/z	857.417	6.31793	thevetin B	M-H	C42H66O18	38.7	0	-0.34941	C08856
6.26_301.0349m/z	301.035	6.25603	Hypolaetin	M-H	C15H10O7	54.4	80.8	-1.68158	C10078
6.14_623.1614m/z	623.161	6.13913	RHOIFOLIN	M+FA-H	C27H30O14	39.7	0	-0.629758	C12627
6.06_287.0549m/z	287.055	6.0605	Fisetin	M+H	C15H10O6	41.3	11.5	-0.519097	C10041
6.03_317.0655m/z	317.065	6.033	Isorhamnetin	M+H	C16H12O7	51	58.5	-0.38389	C10084
5.95_273.0969m/z	273.097	5.951	Arbutin	M+H	C12H16O7	40.2	11	0.219554	C06186
5.94_303.0497m/z	303.05	5.94413	Quercetin	M+H	C15H10O7	50.5	55.9	-0.693243	C00389
5.83_449.1077m/z	449.108	5.82715	Astragalin	M+H	C21H20O11	57.3	93.9	-0.215482	C12249
5.74_854.1216m/z	854.122	5.7419	Acetyl-CoA	M+FA-H	C23H38N7O17P3S	35.9	0	-2.98974	C00024
5.40_465.1031m/z	465.103	5.40108	Hyperoside	M+H	C21H20O12	57.3	93.4	0.770708	C10073
5.29_433.1132m/z	433.113	5.29105	Vitexin	M+H	C21H20O10	46.6	41.2	0.55621	C01460
5.28_193.0504m/z	193.05	5.27612	Ferulate	M-H	C10H10O4	38.8	0.788	-1.26557	C01494
5.25_367.1032m/z	367.103	5.24862	3-O-Feruloylquinic acid	M-H	C17H20O9	52.9	71.8	-0.822605	C02572
5.20_553.1925m/z	553.193	5.20048	gibberellin A3 O-beta-D-glucoside	M+FA-H	C25H32O11	40	9.15	-0.256485	C04070
5.19_611.1609m/z	611.161	5.18783	Rutin	M+H	C27H30O16	46.7	37.5	0.330172	C05625
5.19_449.1079m/z	449.108	5.18783	Quercitrin	M+H	C21H20O11	52.8	76.8	0.152392	C01750
5.13_179.0558m/z	179.056	5.13158	Allose	M-H	C6H12O6	39.6	6.06	-1.77576	C01487
4.69_281.1390m/z	281.139	4.6859	4-Heptyloxybenzoic acid	M+FA-H	C14H20O3	39.2	0	-1.80842	C14274
4.65_565.1552m/z	565.155	4.65177	Apiin	M+H	C26H28O14	43.7	32	0.110851	C04858
4.47_337.0925m/z	337.093	4.47457	Phosphodimethylethanolamine	2M-H	C4H12NO4P	39.7	11	-2.8939	C13482
4.45_520.1455m/z	520.145	4.45273	6''-O-Malonyldaidzin	M+NH4	C24H22O12	39.9	16.2	0.997932	C16191
4.23_473.1655m/z	473.166	4.23327	Biopterin	2M-H	C9H11N5O3	38.6	0	0.935666	C06313
4.10_229.0858m/z	229.086	4.10178	Resveratrol	M+H	C14H12O3	42.1	22.5	-0.379021	C03582
4.05_288.0868m/z	288.087	4.04677	Apigenin	M+NH4	C15H10O5	38.8	10.6	0.454372	C01477
3.92_338.1235m/z	338.123	3.92353	1H-Indol-3-ylacetyl-myo-inositol	M+H	C16H19NO7	43.7	31.2	0.10243	C03868
3.92_320.1130m/z	320.113	3.92353	Hesperetin	M+NH4	C16H14O6	44.9	42.3	0.391788	C01709
3.92_130.0648m/z	130.065	3.92353	Isoquinoline	M+H	C9H7N	42.4	23.1	-2.28165	C06323
3.89_299.1133m/z	299.113	3.89135	Salidroside	M-H	C14H20O7	39.8	1.11	-1.14311	C06046
3.87_406.2068m/z	406.207	3.8685	Tuberonic acid glucoside	M+NH4	C18H28O9	37.2	3.18	-0.835929	C08558
3.86_187.0732m/z	187.073	3.86162	Eugenol	M+Na	C10H12O2	39.9	2.73	1.29985	C10453
3.86_121.0645m/z	121.065	3.86162	Styrene Oxide	M+H	C8H8O	47.9	46.4	-2.04922	C02083
3.81_272.0925m/z	272.093	3.80662	Hispidol	M+NH4	C15H10O4	39.1	12.6	3.09566	C08644
3.73_482.1745m/z	482.175	3.73098	5-Methyltetrahydrofolic acid	M+Na	C20H25N7O6	37.1	3.57	-2.94063	C00440
3.63_361.1135m/z	361.114	3.63003	Catalpol	M-H	C15H22O10	39.1	3.67	-1.32177	C09773
15.90_651.4585m/z	651.458	15.9034	10-Nitrolinoleic acid	2M+H	C18H31NO4	38.8	5.2	0.8891	C13800
15.07_339.2891m/z	339.289	15.0716	Glycidyl oleate	M+H	C21H38O3	39.5	9.47	-0.843809	C19426
14.26_335.2582m/z	335.258	14.2607	Tetrahydrodeoxycorticosterone	M+H	C21H34O3	41.1	14.3	0.284016	C13713
14.16_409.1882m/z	409.188	14.1576	L-Tryptophan	2M+H	C11H12N2O2	39	0.109	2.86052	C00078
14.03_291.2319m/z	291.232	14.0334	Dihydrotestosterone	M+H	C19H30O2	38.1	5.17	0.0551531	C03917
11.36_485.2925m/z	485.293	11.3558	Hydrocortisone cypionate	M-H	C29H42O6	40.3	12.8	3.46219	C08176
11.17_943.5271m/z	943.527	11.1675	Soyasaponin I	M+H	C48H78O18	49.4	69.4	1.08006	C08983
10.98_857.4538m/z	857.454	10.9788	bayogenin 3-O-cellobioside	M+FA-H	C42H68O15	45.1	35	-0.246207	C08932
1.94_164.0705m/z	164.071	1.93752	Coumarin	M+NH4	C9H6O2	38.1	0	-0.659706	C05851
1.37_164.0471n	165.054	1.36727	p-Coumaric acid	M+H, M+NH4	C9H8O3	49	51.2	-1.28012	C00811
1.36_123.0439m/z	123.044	1.36038	4-Hydroxybenzaldehyde	M+H	C7H6O2	42.6	21.6	-1.32654	C00633
1.20_180.0663m/z	180.066	1.20495	L-Tyrosine	M-H	C9H11NO3	38.5	0	-1.65238	C00082
1.12_191.0193m/z	191.019	1.12233	Citric acid	M-H	C6H8O7	40.9	8.37	-2.19873	C00158
1.12_111.0086m/z	111.009	1.12233	2-Furoic acid	M-H	C5H4O3	47.1	38.1	-1.55102	C01546
0.95_130.9984m/z	130.998	0.94545	Oxaloacetate	M-H	C4H4O5	39.8	5.12	-1.25147	C00036
0.69_441.1005m/z	441.1	0.693717	Gluconasturtiin	M+NH4	C15H21NO9S2	36.4	2.54	2.11255	C08417
0.66_98.9838m/z	98.9838	0.65925	Phosphoric acid	M+H	H3O4P	39	0	-3.34638	C00009
0.66_585.1428m/z	585.143	0.65925	2-hydroxyflutamide	2M+H	C11H11F3N2O4	38.9	0.0364	2.25252	C14204
0.66_277.0325m/z	277.032	0.66345	D-Ribitol 5-phosphate	M+FA-H	C5H13O8P	38.6	0	-2.38706	C01068
0.66_199.0009m/z	199.001	0.66345	D-Erythrose 4-phosphate	M-H	C4H9O7P	43.8	24.8	-1.88814	C00279
9.63_463.1835m/z	463.183	9.6272	Diferuloylputrescine	M+Na	C24H28N2O6	38.9	9.47	-1.11726
9.59_941.4754m/z	941.475	9.59282	Melilotussaponin O2	M+H	C47H72O19	41.1	19.9	1.39215
9.48_978.5044m/z	978.504	9.47645	Fucalpha1-2Galbeta1-3GalNAcbeta1-4(NeuAcalpha2-8NeuAcalpha2-3)Galbeta1-4Glcbeta-Cer(d18:1/16:0)	M+2H	C88H154N4O43	34.7	0.368	-2.25741
9.48_637.4220m/z	637.422	9.47645	Glycopyrrolate	2M+H	C19H28NO3+	37.4	0.202	1.37891
9.04_415.1749m/z	415.175	9.03605	Laxiflorin	M+H	C23H26O7	36.2	4.98	-0.483362
8.18_471.3115m/z	471.312	8.18133	(22E,24E)-1alpha,25-dihydroxy-22,23,24,24a-tetradehydro-24a-homovitamin D3 / (22E,24E)-1alpha,25-dihydroxy-22,23,24,24a-tetradehydro-24a-homocholecalciferol	M+FA-H	C28H42O3	38.5	0.388	-0.217432
8.08_913.4798m/z	913.48	8.08093	Medicagenic acid 28-O-[b-D-xylosyl-(1->4)-a-L-rhamnosyl-(1->2)-a-L-arabinosyl] ester	M+H	C46H72O18	43.4	30.4	0.733554
8.07_943.4904m/z	943.49	8.06718	Phytolaccoside I	M+H	C47H74O19	42.3	17.4	0.756593
8.07_797.4325m/z	797.432	8.07405	Pandaroside A	M+H	C41H64O15	40.6	8.92	0.870728
8.07_781.4371m/z	781.437	8.06718	Cynarasaponin F	M+H	C41H64O14	43.1	21.2	0.294455
8.07_635.3797m/z	635.38	8.07405	Cholestane-3,7,12,25-tetrol-3-glucuronide	M+Na	C33H56O10	41.2	16.5	5.13118
8.07_583.3634m/z	583.363	8.06718	Vitamin D3 glucosiduronate	M+Na	C33H52O7	42.4	30.2	5.12043
8.07_524.0825m/z	524.082	8.06718	Cefditoren	M+NH4	C19H18N6O5S3	36.8	4.88	-2.79091
8.07_187.1479m/z	187.148	8.07405	7-Ethyl-5,6-dihydro-1,4-dimethylazulene	M+H	C14H18	50.7	64.6	-1.13884
8.06_599.3585m/z	599.359	8.0603	Trillin	M+Na	C33H52O8	44.9	36.1	5.36048
7.77_485.3261m/z	485.326	7.77187	21-Hydroxyisoglabrolide	M+H	C30H44O5	55.7	84.3	-0.0267692
7.46_529.1347m/z	529.135	7.46315	Luteolin 3'-methyl ether 7-(6''-crotonylglucoside)	M-H	C26H26O12	41.1	10.5	-0.835871
7.35_513.1392m/z	513.139	7.34598	6-Hydroxykaempferol 3,6-dimethyl ether 7-glucoside	M+Na	C24H26O11	40.9	22.1	5.02393
7.35_461.1085m/z	461.109	7.3461	malvidin-3-O-arabinoside	M-H	C22H22O11	42.5	15.1	-0.86683	-
7.23_463.1238m/z	463.124	7.22902	6-Methoxykaempferol 3-rhamnoside	M+H	C22H22O11	47.7	42.6	0.577724
7.19_679.3698m/z	679.37	7.19473	Pandaroside B	M+FA-H	C35H54O10	54	74.2	-0.128051
7.02_433.1130m/z	433.113	7.0227	Kaempferol 4'-rhamnoside	M+H	C21H20O10	42.9	23.9	0.227553
6.99_447.0931m/z	447.093	6.99033	petunidin-3-O-arabinoside	M-H	C21H20O11	38.9	3.27	-0.340438
6.65_693.2043m/z	693.204	6.65305	Embigenin 2''-(2'''-acetylrhamnoside)	M+FA-H	C31H36O15	42.9	30.1	0.990824
6.63_579.2084m/z	579.208	6.63233	3,4,7-Trihydroxy-5-methoxy-8-prenylflavan 7-O-beta-D-glucopyranoside	M+FA-H	C27H34O11	45.6	32.5	0.106866
6.60_506.2723n	551.27	6.59795	geodisterol-O-sulfite	M-H, M+FA-H	C28H42O6S	40	17.1	4.13277
6.55_461.1448m/z	461.145	6.54982	3,7-Dihydroxy-2-[4-hydroxy-3-(4-hydroxy-3-methylbutyl)phenyl]-5,6-dimethoxy-4H-1-benzopyran-4-one	M+FA-H	C22H24O8	46.9	36.7	-1.31691
6.53_595.2033m/z	595.203	6.52918	2-Phenylethanol glucuronide	2M-H	C14H18O7	45.3	36.1	0.0939641
6.53_580.2159n	603.205	6.52792	(+)-7-epi-Syringaresinol 4'-glucoside	M+NH4, M+Na	C28H36O13	38.2	6.4	0.519597
6.53_418.1621m/z	418.162	6.52792	Lophirone J	M+NH4	C25H20O5	37.7	11.3	-6.99624
6.53_401.1595m/z	401.16	6.52792	Brevicornin	M+H	C22H24O7	40.6	11.4	0.0699768
6.45_133.1010m/z	133.101	6.44587	3,4-Dimethylstyrene	M+H	C10H12	44.6	30.8	-1.33808
6.44_191.1430m/z	191.143	6.43898	2,2,6,7-Tetramethylbicyclo[4.3.0]nona-1(9),4-dien-8-one	M+H	C13H18O	42.2	19.2	-0.427703
6.41_435.1650m/z	435.165	6.41148	Vestitone 7-glucoside	M+H	C22H26O9	44.6	37.7	-0.00526938
6.40_540.2441m/z	540.244	6.4046	Isolariciresinol 9-O-beta-D-glucoside	M+NH4	C26H34O11	46.5	45.9	0.252079
6.40_313.1432m/z	313.143	6.4046	Honyudisin	M+H	C19H20O4	41	19.2	-0.606612
6.26_445.0772m/z	445.077	6.26292	3,5,7,4'-Tetrahydroxy-8-C-(3-methylsuccinoyl)flavone	M+FA-H	C20H16O9	40.4	13.7	-1.03198
6.24_535.1814m/z	535.181	6.24228	5-Hydroxy-6,7,3',4',5'-pentamethoxyflavanone 5-O-rhamnoside	M-H	C26H32O12	41.3	13	-1.33636
6.14_375.1439m/z	375.144	6.13622	6-C-(3-Hydroxyisopentyl)eriodictyol	M+H	C20H22O7	40.8	16.1	0.289407
6.13_537.1969m/z	537.197	6.12935	8-Hydroxypinoresinol 4-glucoside	M+H	C26H32O12	39.6	6.03	0.495697
6.05_501.3218m/z	501.322	6.04675	1-Hydroxyacorenone	2M+H	C15H22O3	39	0.735	1.49313
6.04_623.1614m/z	623.161	6.03562	Kaempferol 3-rhamnoside-(1->2)-rhamnoside	M+FA-H	C27H30O14	54.7	76.3	-0.675685
5.99_535.1807m/z	535.181	5.98945	5-Hydroxy-7,4'-dimethoxy-6,8-di-C-prenylflavanone 5-O-galactoside	M+FA-H	C25H30O10	40.2	17.3	-2.88624
5.99_461.1449m/z	461.145	5.98945	Andrographidin A	M-H	C23H26O10	46.6	36.2	-0.970625
5.95_727.1871m/z	727.187	5.951	Cyanidin 3-(6''-p-coumarylsambubioside)	M+H	C35H34O17	38.3	1.11	0.306928
5.94_625.1769m/z	625.177	5.93725	Narcissin	M+H	C28H32O16	51.9	66.2	0.942075
5.93_479.1187m/z	479.119	5.93038	Petunidin 3-galactoside	M+H	C22H22O12	51.8	66.1	0.661866	-
5.88_463.1596m/z	463.16	5.88223	Cyrtopterin	M+H	C23H26O10	41.6	15.5	-0.680781
5.88_375.1436m/z	375.144	5.88223	2-[4,6-dihydroxy-2-methoxy-3-(3-methylbut-2-en-1-yl)phenyl]-1-(2,4,5-trihydroxyphenyl)ethan-1-one	M+H	C20H22O7	41.1	18.6	-0.647045
5.83_595.1658m/z	595.166	5.82715	Kaempferol-7-O-neohesperidoside	M+H	C27H30O15	57	89.6	0.103102
5.74_551.1767m/z	551.177	5.7419	4,6,2',4'-Tetramethoxychalcone 2'-beta-glucoside	M+FA-H	C25H30O11	37.9	2.84	-0.606775
5.61_640.2239m/z	640.224	5.6139	Scutellarein 7,4'-dimethyl ether 6-rhamnosyl-(1->2)-glucoside	M+NH4	C29H34O15	44.1	26.9	0.484185
5.50_287.0548m/z	287.055	5.49755	3,5-dihydroxy-2-[(2E)-3-(4-hydroxyphenyl)prop-2-enoyl]cyclohexa-2,5-diene-1,4-dione	M+H	C15H10O6	40.9	10.8	-0.769101
5.28_609.1459m/z	609.146	5.283	Kaempferol 3-xylosyl-(1->2)-rhamnoside	M+FA-H	C26H28O14	47.9	40.5	-0.412337
5.28_519.2958m/z	519.296	5.28418	Corchoroside B	M+H	C29H42O8	37.5	1.09	1.00659
5.24_727.2085m/z	727.209	5.24292	Kaempferol 3-(2G-apiosylrobinobioside)	M+H	C32H38O19	44.3	29.4	0.747985
5.21_612.2047n	611.197	5.21423	NEOHESPERIDIN DIHYDROCHALCONE	M-H, M+FA-H	C28H36O15	40.6	12.3	-1.21504
5.20_341.1017m/z	341.102	5.20158	1-(2H-1,3-benzodioxol-5-yl)-3-hydroxy-3-(4-methoxy-1-benzofuran-5-yl)propan-1-one	M+H	C19H16O6	40.2	16.7	-0.705132
5.19_359.1124m/z	359.112	5.1947	5,8-Dihydroxy-3-(4-hydroxybenzyl)-7-methoxy-4-chromanone 8-acetate	M+H	C19H18O7	43	19	-0.312485
5.19_301.0343m/z	301.034	5.1947	EMODIC ACID	M+H	C15H8O7	40.8	21.4	0.17642
5.11_299.1134m/z	299.113	5.11095	methyl 4-[2-(2-formyl-vinyl)-3-hydroxy-5-oxo-cyclopentyl]-butanoate	M+FA-H	C13H18O5	42.9	19.7	-0.746527
5.03_696.2142m/z	696.214	5.02963	Kaempferol 3-(4'',6''-diacetylglucoside)-7-rhamnoside	M+NH4	C31H34O17	38.8	7.5	1.08112
5.03_534.1606m/z	534.161	5.02963	2'',3''-Diacetylcosmosiin	M+NH4	C25H24O12	48.7	51.1	-0.0279451
4.98_639.1928m/z	639.193	4.97542	4,2'-Dihydroxy-4',6'-dimethoxychalcone 4-apiosyl-(1->2)-glucoside	M+FA-H	C28H34O14	45.6	33.2	-0.38703
4.94_484.1820m/z	484.182	4.94077	Agnuside	M+NH4	C22H26O11	40.2	12.2	1.43945
4.87_503.1911m/z	503.191	4.86505	Phellodensin F	M+H	C26H30O10	40.2	16.5	-0.112882
4.77_302.1234m/z	302.123	4.76868	D-Vacciniin	M+NH4	C13H16O7	39.4	5.73	0.0346582
4.76_456.1863m/z	456.186	4.7618	Cnidimol 7-glucoside	M+NH4	C21H26O10	40.9	17.5	-0.35706
4.73_563.1403m/z	563.14	4.73468	6-C-Xylosylluteolin 2''-O-rhamnoside	M-H	C26H28O14	50.1	55.8	-0.567421
4.65_419.0973m/z	419.097	4.65177	Juglanin	M+H	C20H18O10	44.2	25.9	0.0882727
4.62_640.2024m/z	640.202	4.62425	Kaempferol 7,4'-dimethyl ether 3-(6''-(E)-p-coumarylglucoside)	M+NH4	C32H30O13	48.9	53.8	-0.152734
4.62_265.1431m/z	265.143	4.61737	gamma-CEHC	M+H	C15H20O4	42.4	21.2	-1.14935
4.57_323.1246m/z	323.125	4.56898	Abyssinone II	M-H	C20H20O4	46.4	56	-13.3417
4.53_329.1109n	347.145	4.53472	Dopamine glucuronide	M+NH4, M+Na	C14H19NO8	42	14.8	-0.589631
4.43_281.1029m/z	281.103	4.42582	Carboxy-ibuprofen	M+FA-H	C13H16O4	39.7	4.55	-0.775174
4.36_404.1542m/z	404.154	4.36332	1-O-Sinapoylglucose	M+NH4	C17H22O10	38.3	5.32	-2.41189
4.35_778.2914m/z	778.291	4.34957	Epimedoside	M+NH4	C37H44O17	43	34	-0.326924
4.35_757.2185m/z	757.218	4.34957	Isorhamnetin 3-xylosyl-(1->3)-rhamnosyl-(1->6)-glucoside	M+H	C33H40O20	42.1	27	-0.115862
4.34_593.1511m/z	593.151	4.33642	Daidzein 7-O-apiosyl-(1->6)-glucoside	M+FA-H	C26H28O13	53	69.1	-0.154867
4.34_579.1357m/z	579.136	4.33642	Rhamnazin 3-(6''-acetylglucoside)	M+FA-H	C25H26O13	51.1	58	0.25208
4.27_595.1658m/z	595.166	4.27383	Safflor Yellow A	M+H	C27H30O15	46.9	38.4	0.134422
4.26_857.2342m/z	857.234	4.26077	Genistein 7,4'-bis(O-glucosylapioside)	M-H	C37H46O23	43.8	36.8	-1.78423
4.25_785.2142m/z	785.214	4.25388	Sexangularetin 3-glucoside-7-rutinoside	M-H	C34H42O21	50.3	61.2	-0.434347
4.21_522.2676n	540.301	4.20508	7,8-Dihydro-3b,6a-dihydroxy-alpha-ionol 9-[apiosyl-(1->6)-glucoside]	M+NH4, M+Na	C24H42O12	37.6	1.93	-0.0500341
4.18_787.2292m/z	787.229	4.18445	Isorhamnetin 3-galactosyl-(1->4)-rhamnosyl-(1->6)-galactoside	M+H	C34H42O21	47.6	49.7	0.0948241
4.16_441.1731m/z	441.173	4.16382	2-[4-(3-Hydroxypropyl)-2-methoxyphenoxy]-1,3-propanediol 1-glucoside	M+Na	C19H30O10	38.9	1.22	-0.0866578
4.16_257.1382m/z	257.138	4.16382	2-[4-(3-Hydroxypropyl)-2-methoxyphenoxy]-1,3-propanediol	M+H	C13H20O5	38.5	1.32	-0.704292
4.12_887.2453m/z	887.245	4.12318	Kaempferol 3-(2G-xylosylrutinoside)-7-glucoside	M-H	C38H48O24	40.7	24.1	-1.0597
3.98_873.2308m/z	873.231	3.98078	Isorhamnetin 3-[2''-(4'''-acetylrhamnosyl)-gentiobioside]	M+FA-H	C36H44O22	42.7	19.7	0.196589
3.98_743.2016m/z	743.202	3.97853	Kaempferol 3-sophoroside-7-alpha-L-arabinofuranoside	M+H	C32H38O20	37.5	2.71	-1.7867
3.93_281.1389m/z	281.139	3.93265	12,13-Dimethyl-5,14-dioxabicyclo[9.2.1]-tetradeca-1(13),11-dien-4-one	M+FA-H	C14H20O3	39.9	5.25	-2.21368
3.87_730.1780m/z	730.178	3.8685	Quercetin 3-(6''-malonylglucoside)-7-glucoside	M+NH4	C30H32O20	37.6	0.0179	-6.41396
3.86_654.2395m/z	654.239	3.86162	Linoside B	M+NH4	C30H36O15	40.3	13.1	0.341372
3.86_550.1905m/z	550.19	3.86162	Sesaminol glucoside	M+NH4	C26H28O12	40.6	16.6	-2.63937
3.86_329.0892m/z	329.089	3.86162	Bergenin	M+H	C14H16O9	35.9	5.68	7.56257
3.86_247.0964m/z	247.096	3.86162	PRENYLETIN	M+H	C14H14O4	41	13.2	-0.454181
3.86_205.0851m/z	205.085	3.86162	7-Ethoxy-4-methylcoumarin	M+H	C12H12O3	40.8	17.1	-4.19129
3.85_300.1208n	323.11	3.85473	4-Methoxybenzyl glucoside	M+H, M+NH4, M+Na	C14H20O7	39.6	3.19	-0.34272
3.84_581.1504m/z	581.15	3.84098	Graveobioside A	M+H	C26H28O15	44.3	24.5	0.476418
3.79_480.1520m/z	480.152	3.78598	Tricin 7-xyloside	M+NH4	C22H22O11	36.7	2.13	4.1647
3.79_448.1942m/z	448.194	3.78598	O-Desmethyltramadol glucuronide	M+Na	C21H31NO8	38.8	6.77	0.016709
3.78_187.0631n	188.07	3.7791	3-Indoleacrylic acid	M+H, M+NH4	C11H9NO2	41.7	13	-1.16699
3.77_581.0945m/z	581.095	3.77223	6-({2-[4-ethyl-3-(sulfooxy)phenyl]-3,5-dihydroxy-3,4-dihydro-2H-1-benzopyran-7-yl}oxy)-3,4,5-trihydroxyoxane-2-carboxylic acid	M+Na	C23H26O14S	34.6	0.0693	1.72317
3.77_549.2080m/z	549.208	3.77223	Alkaloid RC	M+NH4	C26H29NO11	39	0.0683	0.240999
3.75_293.0874m/z	293.087	3.74697	1-O-(3R,4-dihydroxy-2-methylene-butanoyl)-beta-D-glucopyranose	M-H	C11H18O9	40.4	5.28	-1.22833
3.73_510.1948m/z	510.195	3.73098	Okanin 3,4,3'-trimethyl ether 4'-glucoside	M+NH4	C24H28O11	39.8	11.6	-4.51712
3.72_552.2073m/z	552.207	3.71723	Simmondsin 2'-ferulate	M+H	C26H33NO12	43.8	31.4	-0.514327
3.72_450.1959m/z	450.196	3.71723	Benzyl gentiobioside	M+NH4	C19H28O11	38	9.49	-2.55818
3.71_464.1893m/z	464.189	3.71035	5-Hydroxy-7,8-dimethoxyflavanone 5-rhamnoside	M+NH4	C23H26O9	38.5	7.39	-5.04355
3.71_453.1737m/z	453.174	3.71035	Phenethyl rutinoside	M+Na	C20H30O10	41.5	14.1	1.37182
3.71_452.1665m/z	452.166	3.71035	Haplopappin A	M+NH4	C25H22O7	36.9	19.7	-9.01896
3.69_496.1807m/z	496.181	3.68973	Persiconin	M+NH4	C23H26O11	41.2	16.5	-1.2724
3.68_464.1567m/z	464.157	3.68285	Pueraria glycoside 3	M+NH4	C22H22O10	36.3	0.355	3.49307
3.62_490.1697m/z	490.17	3.6209	Formononetin 7-O-(6''-acetylglcoside)	M+NH4	C24H24O10	42.9	28.5	-2.18718
3.61_552.2072m/z	552.207	3.61403	3,4-Dihydroxychalcone 4-beta-L-arabinopyranosyl-(1->4)-galactoside	M+NH4	C26H30O12	40.8	18.4	-0.619594
3.59_522.1969m/z	522.197	3.59338	3-(3,4-dimethoxyphenyl)-7-methoxy-8-methyl-5-{[3,4,5-trihydroxy-6-(hydroxymethyl)oxan-2-yl]oxy}-4H-chromen-4-one	M+NH4	C25H28O11	44.9	27.3	-0.117267
3.48_596.2335m/z	596.233	3.48388	8-Acetoxypinoresinol 4-glucoside	M+NH4	C28H34O13	43.4	29.1	-0.506735
3.30_178.0862m/z	178.086	3.2982	5-[2H-Pyrrol-4-(3H)-ylidenemethyl]-2-furanmethanol	M+H	C10H11NO2	49.8	56.2	-0.502039
18.08_546.3906n	547.398	18.0756	cholest-5,24-dien-3beta-ol 3-O-beta-D-glucopyranoside	M+H, M+Na	C33H54O6	37.2	1.93	-2.71562
15.75_295.2630m/z	295.263	15.7521	(E)-3,7-Dimethyl-2,6-octadienyl nonanoate	M+H	C19H34O2	38.9	0.673	-0.509153
15.42_293.2473m/z	293.247	15.4224	9Z,11E,13E-Octadecatrienoic acid methyl ester	M+H	C19H32O2	41.2	9.55	-0.751622
15.35_425.3769m/z	425.377	15.3468	Beta-Amyrone	M+H	C30H48O	37.7	0.981	-2.13133
15.18_269.1358m/z	269.136	15.1816	Dibutyl malate	M+Na	C12H22O5	46.3	39	-0.680579
15.17_265.2524m/z	265.252	15.1748	9S,10R-Epoxy-6Z-octadecene	M+H	C18H32O	39	1.79	-0.913958
15.12_425.3771m/z	425.377	15.1198	24-isopropenyl-22E-dehydrocholesterol	M+H	C30H48O	37.5	1.53	-1.56419
15.11_429.1946m/z	429.195	15.11	Ptilosteroid B	M-H	C21H34O7S	42.9	27.9	-1.54524
15.07_357.2992m/z	357.299	15.0716	Heneicosanedioic acid	M+H	C21H40O4	44	33.3	-2.09029
14.70_354.2764n	355.284	14.7005	2-Linoleoyl Glycerol	M+H, M+Na	C21H38O4	47.5	42.1	-1.74357
14.70_337.2735m/z	337.274	14.7005	Pregnanetriol	M+H	C21H36O3	43.6	22.1	-0.557448
14.70_245.2261m/z	245.226	14.7005	3-Allyl-1-cyclohexene	2M+H	C9H14	47.7	47.2	-0.977341
14.60_355.2832m/z	355.283	14.5973	1-Linoleoylglycerol	M+H	C21H38O4	42.3	23	-3.07082
14.60_263.2367m/z	263.237	14.5973	6-[3]-ladderane-1-hexanol	M+H	C18H30O	43.2	21.1	-0.857337
14.26_353.2683m/z	353.268	14.2607	Monolinolenin (9c,12c,15c)	M+H	C21H36O4	47.5	40.8	-0.856796
14.26_349.1982m/z	349.198	14.2607	2R-HpOTrE	M+Na	C18H30O5	38.4	3.63	-1.125
14.26_261.2211m/z	261.221	14.2607	6-[5]-ladderane-1-hexanol	M+H	C18H28O	44.7	29.7	-0.742845
13.12_421.3098m/z	421.31	13.1197	1alpha-hydroxy-22-(3-methylphenyl)-23,24,25,26,27-pentanorvitamin D3 / 1alpha-hydroxy-22-(3-methylphenyl)-23,24,25,26,27-pentanorcholecalciferol	M+H	C29H40O2	37.3	2.45	-0.635513
12.36_453.2984m/z	453.298	12.3637	25-Hydroxyvitamin D3-26,23-lactol	M+Na	C27H42O4	37.4	7.43	2.11699
11.83_446.1935m/z	446.193	11.8341	PC(6:2(2E,4E)/6:2(2E,4E))	M+H	C20H32NO8P	38.6	2.7	-0.850944
11.83_429.1907m/z	429.191	11.8341	1-Isomangostin hydrate	M+H	C24H28O7	45.7	34.8	-0.0698026
10.93_813.4638m/z	813.464	10.9274	Kudzusaponin SA1	M+H	C42H68O15	43.4	34.3	0.888751
10.93_469.3670m/z	469.367	10.9274	Ambonic acid	M+H	C31H48O3	50.3	65.7	-1.31618
10.93_423.3617m/z	423.362	10.9274	Theonellasterol B	M+H	C30H46O	43.9	35.7	-1.02716
10.56_956.4993n	957.507	10.5553	Sandosaponin A	M+H, M+NH4, M+Na	C48H76O19	51.1	63.1	1.30058
10.56_795.4526m/z	795.453	10.5553	Cynarasaponin C	M+H	C42H66O14	41.3	21.5	0.135589
10.38_737.4471m/z	737.447	10.3769	Antanapeptin A	M+H	C41H60N4O8	37.8	0.00559	-1.73958
1.54_326.1235m/z	326.123	1.5387	4R,5R,6S-Trihydroxy-2-hydroxymethyl-2-cyclohexen-1-one 6-(2-hydroxy-6-methylbenzoate)	M+NH4	C15H16O7	38.6	2	0.111957
1.41_180.1018m/z	180.102	1.40852	beta-Dolabrin	M+NH4	C10H10O2	51.8	65.7	-0.388673
0.71_358.1491m/z	358.149	0.714333	Linocinnamarin	M+NH4	C16H20O8	38.2	3.76	-1.45153
5.63_623.1619m/z	623.162	5.63187	Pelargonidin 3-robinobioside	M+FA-H	C27H30O14	38.1	0	0.203484	-

## Sheet: T vs P
Compound	m/z	Retention time (min)	Accepted Description	Adducts	Formula	Score	Fragmentation Score	Mass Error (ppm)	KEGG
0.63_132.0301m/z	132.03	0.629083	L-Aspartic acid	M-H	C4H7NO4	47.6	40.2	-1.14788	C00049
0.65_333.0590m/z	333.059	0.6497	1-(sn-Glycero-3-phospho)-1D-myo-inositol	M-H	C9H19O11P	48	42.2	-0.729509	C01225
0.66_199.0009m/z	199.001	0.66345	D-Erythrose 4-phosphate	M-H	C4H9O7P	43.8	24.8	-1.88814	C00279
0.66_98.9838m/z	98.9838	0.65925	Phosphoric acid	M+H	H3O4P	39	0	-3.34638	C00009
0.67_261.0370m/z	261.037	0.666133	Galactose 1-phosphate	M+H	C6H13O9P	42	14.8	-0.135884	C00446
0.77_606.0743m/z	606.074	0.77355	UDP-N-acetyl-alpha-D-glucosamine	M-H	C17H27N3O17P2	40	13.9	0.0928784	C00043
0.91_348.0703m/z	348.07	0.906867	Adenosine monophosphate	M+H	C10H14N5O7P	39.9	10.6	-0.0770596	C00020
0.94_129.0192m/z	129.019	0.938583	3-Butynoate	M+FA-H	C4H4O2	39.3	0	-2.16273	C06144
0.95_130.9984m/z	130.998	0.94545	Oxaloacetate	M-H	C4H4O5	39.8	5.12	-1.25147	C00036
0.95_87.0086m/z	87.0086	0.94545	Pyruvic acid	M-H	C3H4O3	39.3	0	-1.66581	C00022
1.09_811.2395m/z	811.239	1.09482	Astringin	2M-H	C20H22O9	37.1	0.342	-7.43339	C10245
1.12_111.0086m/z	111.009	1.12233	2-Furoic acid	M-H	C5H4O3	47.1	38.1	-1.55102	C01546
1.12_173.0089m/z	173.009	1.12233	cis-Aconitic acid	M-H	C6H6O6	39.6	3.75	-1.45756	C00417
1.12_191.0193m/z	191.019	1.12233	Citric acid	M-H	C6H8O7	40.9	8.37	-2.19873	C00158
10.87_648.3744m/z	648.374	10.8724	Nummularine A	M+H	C36H49N5O6	45	38.1	-1.73708	C10011
13.35_689.2099m/z	689.21	13.3536	Glycogen	M+Na	C24H42O21	33.4	0	-1.81807	C00182
13.83_719.2211m/z	719.221	13.8277	Quinoline-3-carboxamides	2M+H	C21H14FN3O2	36.5	0	-0.302262	C11694
13.83_721.2324m/z	721.232	13.8277	Fenofibrate	2M+H	C20H21ClO4	37.6	14.5	-0.794695	C07586
14.03_291.2319m/z	291.232	14.0334	Dihydrotestosterone	M+H	C19H30O2	38.1	5.17	0.0551531	C03917
14.26_335.2582m/z	335.258	14.2607	Tetrahydrodeoxycorticosterone	M+H	C21H34O3	41.1	14.3	0.284016	C13713
14.56_455.3527m/z	455.353	14.5617	Oleanolic acid	M-H	C30H48O3	39	0	-0.74709	C17148
14.71_309.1671m/z	309.167	14.7073	S-(3-Methylbutanoyl)-dihydrolipoamide-E	M+NH4	C13H25NO2S2	37.6	0	2.17981	C05119
15.11_829.5077m/z	829.508	15.1129	Telithromycin	M+NH4	C43H65N5O10	40	4.17	0.856145	C12009
15.18_273.1307m/z	273.131	15.1816	Morellin	M+2H	C33H36O7	38.5	5.4	1.53246	C10085
15.20_827.4928m/z	827.493	15.2024	Oligomycin B	M+Na	C45H72O12	36.6	0	1.50122	C11312
15.41_671.2710m/z	671.271	15.4087	Aspartylglycosamine	2M+H	C12H21N3O8	36	1.52	-2.95365	C04540
15.63_654.2700n	655.277	15.6282	Coproporphyrin III	M+H, M+Na	C36H38N4O8	34.5	0.272	1.61082	C05770
3.28_259.1363m/z	259.136	3.28443	3'-O-methylbatatasin III	M+H	C16H18O3	34.7	1.63	13.156	C10271
3.66_430.1557m/z	430.156	3.66222	Cyflufenamid	M+NH4	C20H17F5N2O2	38.2	0	2.10991	C18516
4.06_138.0549m/z	138.055	4.06052	2-Aminobenzoic acid	M+H	C7H7NO2	43.6	23.6	-0.549768	C00108
4.23_473.1655m/z	473.166	4.23327	Biopterin	2M-H	C9H11N5O3	38.6	0	0.935666	C06313
4.36_355.1027m/z	355.103	4.36392	Gentiopicrin	M-H	C16H20O9	40.4	6.56	-2.085	C09782
4.36_611.1610m/z	611.161	4.36332	Cyanin	M+H	C27H30O16	43.2	25.7	0.567861	C08639
4.80_735.2136m/z	735.214	4.80347	5-O-Feruloylquinic acid	2M-H	C17H20O9	37.8	0	-0.76245	C02572
4.92_794.1007m/z	794.101	4.9204	Formyl-CoA	M-H	C22H36N7O17P3S	35.2	0	-2.73454	C00798
4.94_712.3670n	711.36	4.94103	digitalin	M-H, M+FA-H	C36H56O14	51.3	60.9	-0.0581728	C08862
5.19_449.1079m/z	449.108	5.18783	Quercitrin	M+H	C21H20O11	52.8	76.8	0.152392	C01750
5.19_611.1609m/z	611.161	5.18783	Rutin	M+H	C27H30O16	46.7	37.5	0.330172	C05625
5.24_287.0548m/z	287.055	5.24292	Maritimetin	M+H	C15H10O6	37.3	0.968	-0.645603	C08720
5.28_193.0504m/z	193.05	5.27612	Ferulate	M-H	C10H10O4	38.8	0.788	-1.26557	C01494
5.40_465.1031m/z	465.103	5.40108	Hyperoside	M+H	C21H20O12	57.3	93.4	0.770708	C10073
5.50_463.0878m/z	463.088	5.4963	Quercetin 3-O-glucoside	M-H	C21H20O12	48	43.9	-0.865608	C05623
5.56_595.1661m/z	595.166	5.55888	6-Nitrobenzo[a]pyrene	2M+H	C20H11NO2	39.1	0	1.38006	C19472
5.56_636.3536m/z	636.354	5.55888	Indinavir	M+Na	C36H47N5O4	37.1	0	2.62756	C07051
5.83_449.1077m/z	449.108	5.82715	Astragalin	M+H	C21H20O11	57.3	93.9	-0.215482	C12249
5.94_303.0497m/z	303.05	5.94413	Quercetin	M+H	C15H10O7	50.5	55.9	-0.693243	C00389
5.95_273.0969m/z	273.097	5.951	Arbutin	M+H	C12H16O7	40.2	11	0.219554	C06186
6.03_924.1408m/z	924.141	6.02612	4-Hydroxyphenylacetyl-CoA	M+Na	C29H42N7O18P3S	35.2	0	-0.487485	C05338
6.06_287.0549m/z	287.055	6.0605	Fisetin	M+H	C15H10O6	41.3	11.5	-0.519097	C10041
6.53_516.1268n	517.134	6.5348	1,3-Dicaffeoylquinic acid	M+H, M+Na	C25H24O12	50.2	55.1	0.00789633	C10445
6.54_355.1025m/z	355.103	6.54168	Chlorogenic acid	M+H	C16H18O9	48.6	53.7	0.463291	C00852
6.66_134.0364n	179.035	6.65993	Phthalide	M-H, M+FA-H	C8H6O2	43	19.2	-2.75482	C09921
6.66_177.0189m/z	177.019	6.65993	ESCULETIN	M-H	C9H6O4	40.7	9.75	-2.30684	C09263
6.66_349.0561m/z	349.056	6.65993	Pentahydroxyflavanone	M+FA-H	C15H12O7	37.7	0	-1.18102	C05911
6.67_365.0512m/z	365.051	6.6668	Dihydromyricetin	M+FA-H	C15H12O8	36.7	0	-0.69603	C02906
6.81_355.1172m/z	355.117	6.80995	Sesamin	M+H	C20H18O6	46.3	42.7	-1.22455	C10882
7.02_287.0549m/z	287.055	7.0227	Datiscetin	M+H	C15H10O6	43.7	21.9	-0.433528	C10036
7.13_431.0980m/z	431.098	7.13285	Afzelin	M-H	C21H20O10	46.8	36.9	-0.959436	C16911
7.22_317.0654m/z	317.065	7.22213	Tamarixetin	M+H	C16H12O7	57.1	88.8	-0.448395	C10188
9.28_913.5157m/z	913.516	9.27693	Soyasaponin II	M+H	C47H76O17	45.5	46	0.243233	C12081
9.34_685.4165m/z	685.417	9.33977	Mosesin 4	M+FA-H	C35H60O10	38.1	0	-0.481055	C17024
3.65_478.1707m/z	478.171	3.64842	Wistin	M+NH4	C23H24O10	38.3	9.54	-0.225813
4.34_207.0650m/z	207.065	4.34268	Vinyl caffeate	M+H	C11H10O4	48.9	54.3	-1.01838
4.46_406.1135m/z	406.114	4.4596	Urolithin B 3-O-glucuronide	M+NH4	C19H16O9	41.1	13.9	0.692066
4.40_385.1131m/z	385.113	4.39832	trans-isoeugenol-O-glucuronide	M+FA-H	C16H20O8	42.4	16.5	-2.81379
7.48_473.3625m/z	473.362	7.48352	Sumaresinolic acid	M+H	C30H48O4	49.4	56.3	-0.131346
3.86_550.1905m/z	550.19	3.86162	Sesaminol glucoside	M+NH4	C26H28O12	40.6	16.6	-2.63937
4.16_286.1435m/z	286.144	4.15695	Secodemethylclausenamide	M+H	C17H19NO3	40.2	9	-0.917905
5.04_771.1990m/z	771.199	5.04218	Schaftoside 6''-O-glucoside	M+FA-H	C32H38O19	44.3	33.8	0.159329
4.37_771.1989m/z	771.199	4.3708	Quercetin 3-glucosyl-(1->6)-glucosyl-(1->4)-rhamnoside	M-H	C33H40O21	46.5	34.9	-0.00690018
5.19_607.1306m/z	607.131	5.1936	Quercetin 3-[6''-(3-hydroxy-3-methylglutaryl)galactoside]	M-H	C27H28O16	49.1	59.6	0.167889
15.11_429.1946m/z	429.195	15.11	Ptilosteroid B	M-H	C21H34O7S	42.9	27.9	-1.54524
15.11_824.5438m/z	824.544	15.1129	PS(19:0/20:5(5Z,8Z,11Z,14Z,17Z))	M+H	C45H78NO10P	38.4	9.12	0.246913
10.34_473.3625m/z	473.363	10.3356	Priverogenin A	M+H	C30H48O4	50.2	56.5	-0.0466474
6.17_467.3156m/z	467.316	6.1706	PRISTIMEROL	M+H	C30H42O4	41.6	12.9	0.0372407
14.70_337.2735m/z	337.274	14.7005	Pregnanetriol	M+H	C21H36O3	43.6	22.1	-0.557448
4.84_469.2951m/z	469.295	4.84442	Pinnasterol	M+Na	C27H42O5	37.4	4.78	5.83953
11.21_643.2810m/z	643.281	11.2088	PI(20:4(5Z,8Z,11Z,14Z)/0:0)	M+Na	C29H49O12P	35.7	1.07	-7.09848
3.71_453.1737m/z	453.174	3.71035	Phenethyl rutinoside	M+Na	C20H30O10	41.5	14.1	1.37182
5.29_499.3055m/z	499.306	5.29105	PG(17:0/0:0)	M+H	C23H47O9P	42.9	25.2	4.94406
3.58_566.1230m/z	566.123	3.58188	Petunidin 3-(6''-acetylglucoside)	M+FA-H	C24H25O13+	38	7.11	-8.95979
3.69_496.1807m/z	496.181	3.68973	Persiconin	M+NH4	C23H26O11	41.2	16.5	-1.2724
11.83_446.1935m/z	446.193	11.8341	PC(6:2(2E,4E)/6:2(2E,4E))	M+H	C20H32NO8P	38.6	2.7	-0.850944
15.41_683.2455m/z	683.246	15.4087	PC(2:0/2:0)	2M+H	C12H24NO8P	32.9	0.053	-14.1573
7.03_623.1615m/z	623.162	7.02958	Patuletin 7-[6''-(2-methylbutyryl)-glucoside]	M+FA-H	C27H30O14	49.1	46.7	-0.43625
15.58_567.4195m/z	567.419	15.5801	Nigroxanthin	M+H	C40H54O2	39.8	9.5	-0.314359
5.94_625.1769m/z	625.177	5.93725	Narcissin	M+H	C28H32O16	51.9	66.2	0.942075
14.26_353.2683m/z	353.268	14.2607	Monolinolenin (9c,12c,15c)	M+H	C21H36O4	47.5	40.8	-0.856796
6.17_827.4432m/z	827.443	6.1706	Medicagenic acid beta-maltoside	M+H	C42H66O16	42.7	31.2	0.959142
6.18_665.3900m/z	665.39	6.17748	Medicagenic acid 3-O-beta-D-glucoside	M+H	C36H56O11	43.8	35.1	0.750907
7.03_521.1663m/z	521.166	7.02958	Matteucinol 7-O-glucoside	M+FA-H	C24H28O10	47.4	41.1	-0.313686
3.77_492.1866m/z	492.187	3.77223	Luteolin 7,3'-dimethyl ether 5-glucoside	M+NH4	C24H26O10	38.1	1.81	0.386241
7.46_529.1347m/z	529.135	7.46315	Luteolin 3'-methyl ether 7-(6''-crotonylglucoside)	M-H	C26H26O12	41.1	10.5	-0.835871
3.55_418.1645m/z	418.165	3.54525	Latrunculin B	M+Na	C20H29NO5S	42.7	28.1	-3.36716
5.83_595.1658m/z	595.166	5.82715	Kaempferol-7-O-neohesperidoside	M+H	C27H30O15	57	89.6	0.103102
4.89_771.1985m/z	771.199	4.89288	Kaempferol 3-xylosyl-(1->3)-rhamnosyl-(1->6)-galactoside	M+FA-H	C32H38O19	49.4	61.3	-0.535823
5.28_609.1459m/z	609.146	5.283	Kaempferol 3-xylosyl-(1->2)-rhamnoside	M+FA-H	C26H28O14	47.9	40.5	-0.412337
3.98_743.2016m/z	743.202	3.97853	Kaempferol 3-sophoroside-7-alpha-L-arabinofuranoside	M+H	C32H38O20	37.5	2.71	-1.7867
5.24_727.2085m/z	727.209	5.24292	Kaempferol 3-(2G-apiosylrobinobioside)	M+H	C32H38O19	44.3	29.4	0.747985
3.94_494.1655m/z	494.165	3.94415	Isorhamnetin 5-glucoside	M+NH4	C23H24O11	44	23.1	-0.433962
3.57_496.1468m/z	496.147	3.57275	Isorhamnetin 4'-glucoside	M+NH4	C22H22O12	38.7	11	3.78026
4.35_757.2185m/z	757.218	4.34957	Isorhamnetin 3-xylosyl-(1->3)-rhamnosyl-(1->6)-glucoside	M+H	C33H40O20	42.1	27	-0.115862
5.93_479.1187m/z	479.119	5.93038	Isorhamnetin 3-O-glucoside	M+H	C22H22O12	54.3	78.6	0.661866
3.98_873.2308m/z	873.231	3.98078	Isorhamnetin 3-[2''-(4'''-acetylrhamnosyl)-gentiobioside]	M+FA-H	C36H44O22	42.7	19.7	0.196589
15.00_609.2711m/z	609.271	14.9966	Harderoporphyrin	M+H	C35H36N4O6	48.6	48.1	0.608218
15.76_652.2898n	653.297	15.759	Haplophytine	M+H, M+Na	C37H40N4O7	42.7	19.7	0.142768
7.48_455.3518m/z	455.352	7.48352	Glypallidifloric acid	M+H	C30H46O3	46.6	42.5	-0.427487
13.33_678.3830n	701.372	13.333	Gingerglycolipid B	M+H, M+NH4, M+Na	C33H58O14	41	11.1	0.499704
4.84_515.3003m/z	515.3	4.84442	Ganoderenic acid A	M+H	C30H42O7	41	12	-0.0212345
7.35_461.1085m/z	461.109	7.3461	Galangin 3-rhamnoside	M+FA-H	C21H20O9	46.5	34	-0.962664
15.46_713.2560m/z	713.256	15.4637	Flowerone	2M+H	C20H20O6	39.8	19.3	-4.5452
3.74_494.1661m/z	494.166	3.74473	Eupalitin 5-rhamnoside	M+NH4	C23H24O11	42.6	19.5	0.912039
4.35_778.2914m/z	778.291	4.34957	Epimedoside	M+NH4	C37H44O17	43	34	-0.326924
6.66_468.1054n	513.103	6.65993	Epigallocatechin 3-O-caffeate	M-H, M+FA-H	C24H20O10	43.3	25.5	-0.584516
5.19_301.0343m/z	301.034	5.1947	EMODIC ACID	M+H	C15H8O7	40.8	21.4	0.17642
14.70_653.2608m/z	653.261	14.7005	Dehydroisocoproporphyrin	M+H	C36H36N4O8	44.2	24.8	0.299739
14.16_439.3214m/z	439.321	14.158	Dehydroergosterol	M+FA-H	C28H42O	51.5	63.1	-0.897311
18.08_546.3906n	547.398	18.0756	cholest-5,24-dien-3beta-ol 3-O-beta-D-glucopyranoside	M+H, M+Na	C33H54O6	37.2	1.93	-2.71562
6.53_401.1595m/z	401.16	6.52792	Brevicornin	M+H	C22H24O7	40.6	11.4	0.0699768
10.84_929.5126m/z	929.513	10.8373	Araliasaponin I	M+H	C47H76O18	41.1	28.4	2.36082
4.18_432.1267n	433.134	4.17758	Apiosylglucosyl 4-hydroxybenzoate	M+H, M+Na	C18H24O12	44	25.2	-0.160526
15.37_365.2684m/z	365.268	15.3743	alpha-Terpineol formate	2M+H	C11H18O2	39.6	0.883	-0.70711
11.06_439.3558m/z	439.356	11.0575	alpha,gamma-Onoceradienedione	M+H	C30H46O2	49.1	59.9	-2.98172
4.18_127.0386m/z	127.039	4.17758	Allomaltol	M+H	C6H6O3	43.9	28.7	-2.70727
6.91_355.1172m/z	355.117	6.90622	Albanin A	M+H	C20H18O6	42.4	20.2	-1.1191
15.42_293.2473m/z	293.247	15.4224	9Z,11E,13E-Octadecatrienoic acid methyl ester	M+H	C19H32O2	41.2	9.55	-0.751622
15.17_265.2524m/z	265.252	15.1748	9S,10R-Epoxy-6Z-octadecene	M+H	C18H32O	39	1.79	-0.913958
6.13_537.1969m/z	537.197	6.12935	8-Hydroxypinoresinol 4-glucoside	M+H	C26H32O12	39.6	6.03	0.495697
3.99_492.1503m/z	492.15	3.99228	Pelargonidin 3-(6''-acetylglucoside)	M+NH4	C23H22O11	38.9	0	0.601553
6.13_177.0190m/z	177.019	6.13227	7,8-Dihydroxycoumarin	M-H	C9H6O4	47.6	42.7	-2.12654
4.21_522.2676n	540.301	4.20508	7,8-Dihydro-3b,6a-dihydroxy-alpha-ionol 9-[apiosyl-(1->6)-glucoside]	M+NH4, M+Na	C24H42O12	37.6	1.93	-0.0500341
13.83_703.2256m/z	703.226	13.8277	6''-O-alpha-D-Galactopyranosylciceritol	M+Na	C25H44O21	38.1	16.8	-1.70262
7.35_513.1392m/z	513.139	7.34598	6-Hydroxykaempferol 3,6-dimethyl ether 7-glucoside	M+Na	C24H26O11	40.9	22.1	5.02393
14.26_261.2211m/z	261.221	14.2607	6-[5]-ladderane-1-hexanol	M+H	C18H28O	44.7	29.7	-0.742845
6.24_535.1814m/z	535.181	6.24228	5-Hydroxy-6,7,3',4',5'-pentamethoxyflavanone 5-O-rhamnoside	M-H	C26H32O12	41.3	13	-1.33636
6.54_337.0917m/z	337.092	6.54168	4-Caffeoyl-1,5-quinolactone	M+H	C16H16O8	46.3	37.6	-0.156913
3.89_517.1791m/z	517.179	3.88912	3-Methyluridine	2M+H	C10H14N2O6	42.4	23.3	2.83508
10.83_945.7187m/z	945.719	10.8304	3alpha-Corosolic acid	2M+H	C30H48O4	45.5	43.5	1.00062
14.70_245.2261m/z	245.226	14.7005	3-Allyl-1-cyclohexene	2M+H	C9H14	47.7	47.2	-0.977341
6.15_303.0498m/z	303.05	6.14998	3,7,3',4',5'-Pentahydroxyflavone	M+H	C15H10O7	52.7	66.4	-0.267072
14.26_243.2106m/z	243.211	14.2607	3,6,9-Hexadecatriene	M+Na	C16H28	37.8	7.78	10.2122
5.50_287.0548m/z	287.055	5.49755	3,5-dihydroxy-2-[(2E)-3-(4-hydroxyphenyl)prop-2-enoyl]cyclohexa-2,5-diene-1,4-dione	M+H	C15H10O6	40.9	10.8	-0.769101
6.63_579.2084m/z	579.208	6.63233	3,4,7-Trihydroxy-5-methoxy-8-prenylflavan 7-O-beta-D-glucopyranoside	M+FA-H	C27H34O11	45.6	32.5	0.106866
6.54_515.1172m/z	515.117	6.54168	3',4',5-Trihydroxy-3,7-dimethoxyflavone 5-glucoside	M+Na	C23H24O12	44.4	40.8	2.49569
6.66_333.0614m/z	333.061	6.65993	3,4,2',4',alpha-Pentahydroxychalcone	M+FA-H	C15H12O6	44.8	40.5	-0.733741
3.59_522.1969m/z	522.197	3.59338	3-(3,4-dimethoxyphenyl)-7-methoxy-8-methyl-5-{[3,4,5-trihydroxy-6-(hydroxymethyl)oxan-2-yl]oxy}-4H-chromen-4-one	M+NH4	C25H28O11	44.9	27.3	-0.117267
14.26_349.1982m/z	349.198	14.2607	2R-HpOTrE	M+Na	C18H30O5	38.4	3.63	-1.125
14.70_354.2764n	355.284	14.7005	2-Linoleoyl Glycerol	M+H, M+Na	C21H38O4	47.5	42.1	-1.74357
6.17_973.5015m/z	973.501	6.1706	28-Glucosylarjunolate 3-[rhamnosyl-(1->3)-glucuronide]	M+H	C48H76O20	41.7	25.5	1.2347
11.21_485.3262m/z	485.326	11.2088	24-Hydroxyglabrolide	M+H	C30H44O5	53	67.2	0.0299233
4.16_441.1731m/z	441.173	4.16382	2-[4-(3-Hydroxypropyl)-2-methoxyphenoxy]-1,3-propanediol 1-glucoside	M+Na	C19H30O10	38.9	1.22	-0.0866578
4.16_257.1382m/z	257.138	4.16382	2-[4-(3-Hydroxypropyl)-2-methoxyphenoxy]-1,3-propanediol	M+H	C13H20O5	38.5	1.32	-0.704292
14.60_355.2832m/z	355.283	14.5973	1-Linoleoylglycerol	M+H	C21H38O4	42.3	23	-3.07082
11.83_429.1907m/z	429.191	11.8341	1-Isomangostin hydrate	M+H	C24H28O7	45.7	34.8	-0.0698026
14.14_423.3257m/z	423.326	14.137	1alpha,25-dihydroxy-3-deoxyvitamin D3 / 1alpha,25-dihydroxy-3-deoxycholecalciferol	M+Na	C27H44O2	38.9	5.7	5.94023
10.27_521.3481m/z	521.348	10.2718	1alpha,25-dihydroxy-2beta-(2-hydroxyethoxy)vitamin D3 / 1alpha,25-dihydroxy-2beta-(2-hydroxyethoxy)cholecalciferol	M+FA-H	C29H48O5	41.5	11.9	-0.620758
6.18_811.4481m/z	811.448	6.17748	15-Oxo-21-hydroxymabiogenin 3-[rhamnosyl-(1->6)-glucoside]	M+H	C42H66O15	42.9	30.9	0.797769
3.93_281.1389m/z	281.139	3.93265	12,13-Dimethyl-5,14-dioxabicyclo[9.2.1]-tetradeca-1(13),11-dien-4-one	M+FA-H	C14H20O3	39.9	5.25	-2.21368
4.37_175.0396m/z	175.04	4.3708	10-hydroxy-8E-Decene-2,4,6-triynoic acid	M-H	C10H8O3	41.2	11.3	-2.38293
15.75_295.2630m/z	295.263	15.7521	(E)-3,7-Dimethyl-2,6-octadienyl nonanoate	M+H	C19H34O2	38.9	0.673	-0.509153
6.43_505.2644m/z	505.264	6.4321	(3S,7E,9R)-4,7-Megastigmadiene-3,9-diol 9-[apiosyl-(1->6)-glucoside]	M+H	C24H40O11	40.3	14.5	0.130229
6.53_580.2159n	603.205	6.52792	(+)-7-epi-Syringaresinol 4'-glucoside	M+NH4, M+Na	C28H36O13	38.2	6.4	0.519597
5.65_521.3116m/z	521.312	5.6525	(-)-Asbestinine 2	M+FA-H	C28H44O6	48.9	53.4	-0.730968
4.69_755.2044m/z	755.204	4.69278	Pelargonidin 3-(2G-xylosylrutinoside)	M+FA-H	C32H38O18	38.7	0	0.487406
4.56_627.1564m/z	627.156	4.56223	Delphinidin 3-gentiobioside	M+H	C27H30O17	40.8	9.86	1.24279
6.67_290.0786n	335.077	6.6668	Epicatechin	M-H, M+FA-H	C15H14O6	45.1	29.8	-1.41217	C09727

## Sheet: P vs C
Compound	m/z	Retention time (min)	Accepted Description	Adducts	Formula	Score	Fragmentation Score	Mass Error (ppm)	KEGG
0.63_130.0497m/z	130.05	0.63175	Pyroglutamic acid	M+H	C5H7NO3	45.4	30.1	-1.38971	C01879
0.63_132.0301m/z	132.03	0.629083	L-Aspartic acid	M-H	C4H7NO4	47.6	40.2	-1.14788	C00049
0.63_145.0616m/z	145.062	0.629083	L-Glutamine	M-H	C5H10N2O3	46.4	37.6	-1.64741	C00064
0.63_257.1026n	258.11	0.63175	Glycerophosphocholine	M+H, M+NH4	C8H20NO6P	41.4	11.7	-0.744071	C00670
0.65_333.0590m/z	333.059	0.6497	1-(sn-Glycero-3-phospho)-1D-myo-inositol	M-H	C9H19O11P	48	42.2	-0.729509	C01225
0.66_98.9838m/z	98.9838		Phosphoric acid	M+H	H3O4P	39	0	-3.34638	C00009
0.68_245.0422m/z	245.042		Isopimpinellin	M-H	C13H10O5	35.8	0	-13.5205	C02162
0.73_115.0036m/z	115.004	0.732283	Fumaric acid	M-H	C4H4O4	39.4	0	-1.1085	C00122
0.73_133.0140m/z	133.014	0.732283	L-Malic acid	M-H	C4H6O5	43.8	21.4	-1.53487	C00149
0.81_275.0213m/z	275.021	0.8148	5-(4-Acetoxybut-1-ynyl)-2,2'-bithiophene	M-H	C14H12O2S2	35.3	0	2.64426	C04485
1.09_811.2395m/z	811.239	1.09482	Astringin	2M-H	C20H22O9	37.1	0.342	-7.43339	C10245
1.12_111.0086m/z	111.009	1.12233	2-Furoic acid	M-H	C5H4O3	47.1	38.1	-1.55102	C01546
1.12_191.0193m/z	191.019	1.12233	Citric acid	M-H	C6H8O7	40.9	8.37	-2.19873	C00158
1.55_767.2460m/z	767.246	1.54677	Acetyl-maltose	2M-H	C14H24O12	39.1	0	-0.398643	C02130
10.43_324.1054n	323.098	10.4304	Bis-D-fructose 2',1:2,1'-dianhydride	M-H, M+FA-H	C12H20O10	39.1	0	-0.896203	C04333
10.58_643.2804m/z	643.28	10.5828	Acronycine	2M+H	C20H19NO3	36.8	0	0.213013	C10632
10.66_501.3218m/z	501.322	10.6555	Callystatin A	M+FA-H	C29H44O4	39.6	0	-0.863986	C16891
10.76_487.3425m/z	487.343	10.7587	Testosterone decanoate	M+FA-H	C29H46O3	39.4	0	-0.810511	C14607
11.36_485.2925m/z	485.293	11.3558	Hydrocortisone cypionate	M-H	C29H42O6	40.3	12.8	3.46219	C08176
11.39_287.1640m/z	287.164		16alpha-Hydroxyestrone	M+H	C18H22O3	38.2	8.61	-0.483513	C05300
12.33_471.3473m/z	471.347	12.3287	Maslinic Acid	M-H	C30H48O4	48.4	45.8	-1.38052	C16939
12.86_971.6611m/z	971.661	12.8633	Thermozeaxanthin-13	M+FA-H	C59H90O8	39.4	0	-0.68484	C15956
2.25_268.1040m/z	268.104	2.24652	Adenosine	M+H	C10H13N5O4	58.2	94.7	-0.202266	C00212
3.78_386.0779n	387.085	3.7791	(7R)-7-(4-Carboxybutanamido)cephalosporanate	M+H, 2M+H	C15H18N2O8S	38.6	0.06	-1.31866	C15666
3.87_439.1384m/z	439.138	3.8685	(S)-F-Willardiine	2M+H	C7H10FN3O4	39.1	0	0.162789	C13671
3.91_376.1364n	375.129	3.91203	Loganate	M-H, 2M-H	C16H24O10	38.8	0.284	-1.55943	C01512
3.91_941.2934m/z	941.293	3.90515	10-formyldihydrofolate	2M-H	C20H21N7O7	37.5	0	0.227227	C03204
4.23_473.1655m/z	473.166	4.23327	Biopterin	2M-H	C9H11N5O3	38.6	0	0.935666	C06313
4.36_611.1610m/z	611.161	4.36332	Cyanin	M+H	C27H30O16	43.2	25.7	0.567861	C08639
4.55_335.0769m/z	335.077	4.54835	5-O-Caffeoylshikimic acid	M-H	C16H16O8	42.8	20.6	-1.07688	C10434
4.92_794.1007m/z	794.101	4.9204	Formyl-CoA	M-H	C22H36N7O17P3S	35.2	0	-2.73454	C00798
5.01_859.1246m/z	859.125	5.01468	CMP-2-aminoethylphosphonate	2M-H	C11H20N4O10P2	36.6	0	1.12173	C05673
5.19_449.1079m/z	449.108	5.18783	Quercitrin	M+H	C21H20O11	52.8	76.8	0.152392	C01750
5.19_611.1609m/z	611.161	5.18783	Rutin	M+H	C27H30O16	46.7	37.5	0.330172	C05625
5.24_287.0548m/z	287.055	5.24292	Maritimetin	M+H	C15H10O6	37.3	0.968	-0.645603	C08720
5.29_433.1132m/z	433.113	5.29105	Vitexin	M+H	C21H20O10	46.6	41.2	0.55621	C01460
5.56_595.1661m/z	595.166	5.55888	6-Nitrobenzo[a]pyrene	2M+H	C20H11NO2	39.1	0	1.38006	C19472
5.60_987.4804m/z	987.48	5.60435	deslanoside	M+FA-H	C47H74O19	36.6	0	-0.201871	C12669
5.74_854.1216m/z	854.122		Acetyl-CoA	M+FA-H	C23H38N7O17P3S	35.9	0	-2.98974	C00024
5.94_303.0497m/z	303.05	5.94413	Quercetin	M+H	C15H10O7	50.5	55.9	-0.693243	C00389
5.95_273.0969m/z	273.097	5.951	Arbutin	M+H	C12H16O7	40.2	11	0.219554	C06186
6.03_317.0655m/z	317.065	6.033	Isorhamnetin	M+H	C16H12O7	51	58.5	-0.38389	C10084
6.14_623.1614m/z	623.161	6.13913	RHOIFOLIN	M+FA-H	C27H30O14	39.7	0	-0.629758	C12627
6.32_857.4173m/z	857.417	6.31793	thevetin B	M-H	C42H66O18	38.7	0	-0.34941	C08856
6.62_533.3119m/z	533.312	6.61858	Cucurbitacin H	M-H	C30H46O8	39.1	1.52	-0.236026	C08799
6.66_173.0452m/z	173.045	6.65993	Shikimic acid	M-H	C7H10O5	42	16.1	-2.22431	C00493
6.80_599.1983m/z	599.198	6.80435	Osthenol-7-O-beta-D-gentiobioside	M+FA-H	C26H34O13	38.8	0	0.328933	C17476
7.02_287.0549m/z	287.055	7.0227	Datiscetin	M+H	C15H10O6	43.7	21.9	-0.433528	C10036
7.13_431.0980m/z	431.098	7.13285	Afzelin	M-H	C21H20O10	46.8	36.9	-0.959436	C16911
7.19_499.3056m/z	499.306	7.18775	Cucurbitacin S	M+H	C30H42O6	46.4	39.4	0.439436	C08806
7.22_317.0654m/z	317.065	7.22213	Tamarixetin	M+H	C16H12O7	57.1	88.8	-0.448395	C10188
7.77_572.2482m/z	572.248	7.77187	Yessotoxin	M+2H	C55H82O21S2	33.5	2.59	2.44129	C16872
8.15_971.4852m/z	971.485	8.14695	Chikusetsusaponin Ib	M+FA-H	C47H74O18	38.4	0	-0.57364	C17545
3.65_478.1707m/z	478.171	3.64842	Wistin	M+NH4	C23H24O10	38.3	9.54	-0.225813
6.95_462.1759m/z	462.176	6.94748	Volubilin	M+NH4	C23H24O9	42.2	16.3	0.174085
4.76_566.2484m/z	566.248	4.7618	Vapreotide	M+2H	C57H70N12O9S2	37.7	19.7	-0.648501
10.35_691.2977m/z	691.298	10.3494	Ustiloxin A	M+NH4	C28H43N5O12S	41.9	25.3	1.51168
3.79_480.1520m/z	480.152	3.78598	Tricin 7-xyloside	M+NH4	C22H22O11	36.7	2.13	4.1647
3.94_442.2079m/z	442.208	3.93728	Taraxinic acid glucosyl ester	M+NH4	C21H28O9	38.2	3.21	1.77606
3.77_799.2302m/z	799.23	3.7676	Swertisin 4'-O-glucoside-2''-O-rhamnoside	M+FA-H	C34H42O19	41.4	28.2	0.0210032
11.72_485.2900m/z	485.29	11.7172	Stigmatellin Y	M+H	C29H40O6	38.4	0.034	0.570188
3.86_550.1905m/z	550.19	3.86162	Sesaminol glucoside	M+NH4	C26H28O12	40.6	16.6	-2.63937
5.04_771.1990m/z	771.199	5.04218	Schaftoside 6''-O-glucoside	M+FA-H	C32H38O19	44.3	33.8	0.159329
10.68_673.3922m/z	673.392	10.6791	Saponin H	M+Na	C36H58O10	37.3	0.124	0.00515808
5.08_640.1645n	641.172	5.07778	Ranupenin 3-rutinoside	M+H, M+Na	C28H32O17	44.8	29.8	0.888545
5.19_607.1306m/z	607.131	5.1936	Quercetin 3-[6''-(3-hydroxy-3-methylglutaryl)galactoside]	M-H	C27H28O16	49.1	59.6	0.167889
5.02_739.1725m/z	739.173	5.02155	Quercetin 3-(3'',4''-diacetylrhamnosyl)-(1->6)-glucoside	M+FA-H	C31H34O18	51.9	87.3	-0.307107
4.84_469.2951m/z	469.295	4.84442	Pinnasterol	M+Na	C27H42O5	37.4	4.78	5.83953
15.46_622.2794n	623.287	15.4637	Phe Phe Phe Tyr	M+H, M+Na	C36H38N4O6	45.8	31.1	0.38599
7.03_623.1615m/z	623.162	7.02958	Patuletin 7-[6''-(2-methylbutyryl)-glucoside]	M+FA-H	C27H30O14	49.1	46.7	-0.43625
5.28_565.3011m/z	565.301	5.28418	Oxyhumulinic acid	2M+H	C15H22O5	39.8	6.43	0.699627
6.95_300.1229m/z	300.123	6.94748	N-trans-p-Coumaroyloctopamine	M+H	C17H17NO4	52.6	69.1	-0.31477
11.75_539.2990m/z	539.299	11.7528	Norselic acid E	M+FA-H	C31H42O5	39.4	6.48	-4.89551
11.72_407.2945m/z	407.295	11.7172	N-oleoyl taurine	M+NH4	C20H39NO4S	40.8	18	1.88366
5.94_625.1769m/z	625.177	5.93725	Narcissin	M+H	C28H32O16	51.9	66.2	0.942075
10.38_899.5010m/z	899.501	10.3838	Medicoside C	M+H	C46H74O17	41.7	24.2	1.26239
3.77_492.1866m/z	492.187	3.77223	Luteolin 7,3'-dimethyl ether 5-glucoside	M+NH4	C24H26O10	38.1	1.81	0.386241
10.58_485.3261m/z	485.326	10.5828	Liquoric acid	M+H	C30H44O5	40.9	18.7	-0.00224445
3.55_418.1645m/z	418.165	3.54525	Latrunculin B	M+Na	C20H29NO5S	42.7	28.1	-3.36716
5.83_595.1658m/z	595.166	5.82715	Kaempferol-7-O-neohesperidoside	M+H	C27H30O15	57	89.6	0.103102
4.89_771.1985m/z	771.199	4.89288	Kaempferol 3-xylosyl-(1->3)-rhamnosyl-(1->6)-galactoside	M+FA-H	C32H38O19	49.4	61.3	-0.535823
5.28_609.1459m/z	609.146	5.283	Kaempferol 3-xylosyl-(1->2)-rhamnoside	M+FA-H	C26H28O14	47.9	40.5	-0.412337
3.98_743.2016m/z	743.202	3.97853	Kaempferol 3-sophoroside-7-alpha-L-arabinofuranoside	M+H	C32H38O20	37.5	2.71	-1.7867
3.94_771.1982m/z	771.198	3.93953	Kaempferol 3-robinobioside-7-alpha-L-arabinofuranoside	M+FA-H	C32H38O19	41.3	21.9	-1.05519
6.04_623.1614m/z	623.161	6.03562	Kaempferol 3-rhamnoside-(1->2)-rhamnoside	M+FA-H	C27H30O14	54.7	76.3	-0.675685
5.24_727.2085m/z	727.209	5.24292	Kaempferol 3-(2G-apiosylrobinobioside)	M+H	C32H38O19	44.3	29.4	0.747985
3.57_496.1468m/z	496.147	3.57275	Isorhamnetin 4'-glucoside	M+NH4	C22H22O12	38.7	11	3.78026
4.35_757.2185m/z	757.218	4.34957	Isorhamnetin 3-xylosyl-(1->3)-rhamnosyl-(1->6)-glucoside	M+H	C33H40O20	42.1	27	-0.115862
5.93_479.1187m/z	479.119	5.93038	Isorhamnetin 3-O-glucoside	M+H	C22H22O12	54.3	78.6	0.661866
3.79_771.2323m/z	771.232	3.79285	Isorhamnetin 3-O-[a-L-rhamnopyranosyl-(1->3)-a-L-rhamnopyranosyl-(1->6)-b-D-glucopyranoside]	M+H	C34H42O20	39.1	16.5	-2.46575
4.18_787.2292m/z	787.229	4.18445	Isorhamnetin 3-galactosyl-(1->4)-rhamnosyl-(1->6)-galactoside	M+H	C34H42O21	47.6	49.7	0.0948241
3.98_873.2308m/z	873.231	3.98078	Isorhamnetin 3-[2''-(4'''-acetylrhamnosyl)-gentiobioside]	M+FA-H	C36H44O22	42.7	19.7	0.196589
10.38_587.3947m/z	587.395	10.3838	Ilexolide A	M+H	C35H54O7	46.4	45.5	0.739244
15.76_652.2898n	653.297	15.759	Haplophytine	M+H, M+Na	C37H40N4O7	42.7	19.7	0.142768
11.38_488.3500n	489.357	11.3808	Glyyunnansapogenin B	M+H, M+Na, 2M+H	C30H48O5	49.5	49	-0.257187
6.59_331.1540m/z	331.154	6.58983	Gibberellin A88	M+H	C19H22O5	42.9	28.1	-0.0451402
6.60_506.2723n	551.27	6.59795	geodisterol-O-sulfite	M-H, M+FA-H	C28H42O6S	40	17.1	4.13277
7.19_535.3267m/z	535.327	7.18775	Ganoderic acid L	M+H	C30H46O8	42	23.1	0.266603
8.36_517.3165m/z	517.316	8.363	Ganoderic acid delta	M+H	C30H44O7	48.3	51.4	0.923456
7.35_461.1085m/z	461.109	7.3461	Galangin 3-rhamnoside	M+FA-H	C21H20O9	46.5	34	-0.962664
15.46_713.2560m/z	713.256	15.4637	Flowerone	2M+H	C20H20O6	39.8	19.3	-4.5452
3.74_494.1661m/z	494.166	3.74473	Eupalitin 5-rhamnoside	M+NH4	C23H24O11	42.6	19.5	0.912039
5.19_301.0343m/z	301.034	5.1947	EMODIC ACID	M+H	C15H8O7	40.8	21.4	0.17642
7.19_453.3003m/z	453.3	7.18775	DIHYDROCELASTROL	M+H	C29H40O4	40.9	17.7	0.887392
14.70_653.2608m/z	653.261	14.7005	Dehydroisocoproporphyrin	M+H	C36H36N4O8	44.2	24.8	0.299739
5.88_463.1596m/z	463.16	5.88223	Cyrtopterin	M+H	C23H26O10	41.6	15.5	-0.680781
7.59_519.3323m/z	519.332	7.59308	Corosin	M+H	C30H46O7	40.2	15.1	1.3389
5.28_519.2958m/z	519.296	5.28418	Corchoroside B	M+H	C29H42O8	37.5	1.09	1.00659
4.76_455.3157m/z	455.316	4.7618	Ceanothenic acid	M+H	C29H42O4	46.4	45.7	0.341798
11.38_441.3364m/z	441.336	11.3808	Camelledionol	M+H	C29H44O3	51.9	66.3	0.145161
3.93_428.1919m/z	428.192	3.9304	Butyl 3-O-caffeoylquinate	M+NH4	C20H26O9	38	4.31	0.97194
11.38_435.3257m/z	435.326	11.3808	beta-Citraurol	M+H	C30H42O2	44.6	31.8	-0.1628
4.18_432.1267n	433.134	4.17758	Apiosylglucosyl 4-hydroxybenzoate	M+H, M+Na	C18H24O12	44	25.2	-0.160526
10.38_737.4471m/z	737.447	10.3769	Antanapeptin A	M+H	C41H60N4O8	37.8	0.00559	-1.73958
5.99_461.1449m/z	461.145	5.98945	Andrographidin A	M-H	C23H26O10	46.6	36.2	-0.970625
11.72_204.1512n	409.31	11.7172	9Z,13-Tetradecadien-11-ynal	M+H, 2M+H	C14H20O	49	49.3	-0.888368
11.72_196.1487n	393.315	11.7172	8E-Hydroxy-4,8-dimethyl-4,9-decadienal	M+Na, 2M+H	C12H20O2	35.5	3.49	11.9731
3.84_311.0932m/z	311.093	3.84323	7-Methoxy-2-methylisoflavone	M+FA-H	C17H14O3	46.5	45.4	2.78573
4.21_522.2676n	540.301	4.20508	7,8-Dihydro-3b,6a-dihydroxy-alpha-ionol 9-[apiosyl-(1->6)-glucoside]	M+NH4, M+Na	C24H42O12	37.6	1.93	-0.0500341
13.83_703.2256m/z	703.226	13.8277	6''-O-alpha-D-Galactopyranosylciceritol	M+Na	C25H44O21	38.1	16.8	-1.70262
3.77_581.0945m/z	581.095	3.77223	6-({2-[4-ethyl-3-(sulfooxy)phenyl]-3,5-dihydroxy-3,4-dihydro-2H-1-benzopyran-7-yl}oxy)-3,4,5-trihydroxyoxane-2-carboxylic acid	M+Na	C23H26O14S	34.6	0.0693	1.72317
5.32_537.1607m/z	537.161	5.31855	5,4'-Dihidroxy-7,8,2',3'-tetramethoxy flavone 5-glucoside	M+H	C25H28O13	43	27.1	0.770451
11.38_425.3413m/z	425.341	11.3808	4,4'-Methylenebis(2,6-di-tert-butylphenol)	M+H	C29H44O2	48.5	51.9	-0.230362
4.98_639.1928m/z	639.193	4.97542	4,2'-Dihydroxy-4',6'-dimethoxychalcone 4-apiosyl-(1->2)-glucoside	M+FA-H	C28H34O14	45.6	33.2	-0.38703
7.52_491.1557m/z	491.156	7.51617	4,2'-Dihydroxy-3,4',6'-trimethoxychalcone 4-glucoside	M-H	C24H28O11	39.3	5.63	-0.341041
3.89_517.1791m/z	517.179	3.88912	3-Methyluridine	2M+H	C10H14N2O6	42.4	23.3	2.83508
6.15_303.0498m/z	303.05	6.14998	3,7,3',4',5'-Pentahydroxyflavone	M+H	C15H10O7	52.7	66.4	-0.267072
5.50_287.0548m/z	287.055	5.49755	3,5-dihydroxy-2-[(2E)-3-(4-hydroxyphenyl)prop-2-enoyl]cyclohexa-2,5-diene-1,4-dione	M+H	C15H10O6	40.9	10.8	-0.769101
8.61_663.3749m/z	663.375	8.60583	2alpha,7beta,15beta,18-tetraacetoxy-cholest-5-en-3alpha-ol	M+FA-H	C35H54O9	55.4	80.8	-0.0898965
7.77_649.3947m/z	649.395	7.77187	2a-Hydroxygypsogenin 3-O-b-D-glucoside	M+H	C36H56O10	50.1	57.6	0.104906
12.36_453.2984m/z	453.298	12.3637	25-Hydroxyvitamin D3-26,23-lactol	M+Na	C27H42O4	37.4	7.43	2.11699
7.59_483.3107m/z	483.311	7.59308	24-Nor-9,11-seco-11-acetoxy-3,6-dihydroxycholest-7,22-dien-9-one	M+Na	C28H44O5	36.9	0.473	5.65574
7.77_503.3367m/z	503.337	7.77187	22-Deoxocucurbitacin D	M+H	C30H46O6	53.6	77	-0.0669966
7.77_485.3261m/z	485.326	7.77187	21-Hydroxyisoglabrolide	M+H	C30H44O5	55.7	84.3	-0.0267692
10.66_519.3321m/z	519.332	10.6555	18-acetoxy-1alpha,25-dihydroxyvitamin D3 / 18-acetoxy-1alpha,25-dihydroxycholecalciferol	M+FA-H	C29H46O5	49.5	58	-1.3921
11.38_471.3468m/z	471.347	11.3808	16-Hydroxy-3-oxo-12-oleanen-28-oic acid	M+H	C30H46O4	55.9	82.1	-0.16134
5.92_449.1782m/z	449.178	5.91662	11,13-Dihydrotaraxinic acid glucosyl ester	M+Na	C21H30O9	38.2	3.02	0.0903616
11.72_173.1322m/z	173.132	11.7172	1,2-Dihydro-1,1,6-trimethylnaphthalene	M+H	C13H16	49.7	52.6	-1.58676
3.74_466.1867m/z	466.187	3.73785	(E)-Squamosamide	M+H	C26H27NO7	35.5	1.1	1.4413
6.43_505.2644m/z	505.264	6.4321	(3S,7E,9R)-4,7-Megastigmadiene-3,9-diol 9-[apiosyl-(1->6)-glucoside]	M+H	C24H40O11	40.3	14.5	0.130229
7.19_471.3106m/z	471.311	7.18775	(3beta,17alpha,23S)-17,23-Epoxy-3,29-dihydroxy-27-norlanosta-7,9(11)-diene-15,24-dione	M+H	C29H42O5	48.6	51.8	0.223918
11.72_472.3191n	495.308	11.7172	(3beta,17alpha,23R)-17,23-Epoxy-3,29-dihydroxy-27-norlanost-8-ene-15,24-dione	M+H, M+Na, 2M+H	C29H44O5	44.6	25.4	0.443805
11.38_407.3308m/z	407.331	11.3808	(25S)-24S,26-cyclo-5alpha-cholestan-3beta-ol	M+Na	C27H44O	42.3	23	6.23763
12.36_435.2917m/z	435.292	12.3637	(22E)-25-hydroxy-24-oxo-22,23-didehydrovitamin D3 / (22E)-25-hydroxy-24-oxo-22,23-didehydrocholecalciferol	M+Na	C27H40O3	43.1	31.5	11.5441
7.59_501.3214m/z	501.321	7.59308	(+)-Armillarin	2M+H	C15H22O3	47.6	47.1	0.681859
