# Supplementary material for: Integrative Metabolomic and Transcriptomic Landscape during Akebia trifoliata Fruit Ripening and Cracking
Source: Int J Mol Sci. 2023 Nov 24;24(23):16732. doi: 10.3390/ijms242316732 (PMC10706055; doi:10.3390/ijms242316732)
Supplement: Supplementary file 1 [file ijms-24-16732-s001.zip › Table S2.xlsx]

## Sheet: Total DEGs
gene_id	NR_annotation	Swissprot_annotation	Pfam_annotation	BP_annotation	MF_annotation	CC_annotation	KO_annotation	Pathway_annotation	FPKM_ G1	FPKM_ G2	FPKM_ G3	FPKM_ T1	FPKM_ T2	FPKM_ T3	FPKM_ P1	FPKM_ P2	FPKM_ P3	FPKM_ C1	FPKM_ C2	FPKM_ C3
TR0_c1_g1	conserved hypothetical protein [Burkholderia multivorans ATCC 17616]	-	-	-	-	-	-	-	11.79	9.05	74.56	0.48	2.6	0	3.37	3.1	51.22	2.63	1.2	3
TR10_c0_g1	PREDICTED: uncharacterized protein LOC104592364 [Nelumbo nucifera]	-	-	-	-	-	-	-	29.89	32.93	33.29	26.37	26.8	26.57	29.22	29.84	28.99	11.87	11.73	12.02
TR10_c0_g2	hypothetical protein BVC80_1543g76 [Macleaya cordata]	-	-	-	-	-	-	-	112.72	114.37	116.68	411.54	403.3	413.32	910.95	915.63	924.94	975.52	967.59	954.63
TR10_c1_g1	-	-	-	-	-	-	-	-	4.85	4.56	4.12	8.26	7.65	8.12	5.08	5.32	5.49	2.12	2.19	2.53
TR10_c3_g1	hypothetical protein CR513_56885 [Mucuna pruriens]	-	-	-	-	-	-	-	3.92	3.25	2.18	6.85	6.07	5.64	39.24	50.55	43.72	68.13	69.31	71.67
TR10_c5_g2	PREDICTED: probable pectate lyase 8 [Nelumbo nucifera]	Probable pectate lyase 8 OS=Arabidopsis thaliana OX=3702 GN=At3g07010 PE=2 SV=1	Pectate lyase;Right handed beta helix region	-	-	-	K01728|pel; pectate lyase [EC:4.2.2.2]	ko00040(Metabolism);ko01100(Metabolism);ko02024(Cellular Processes)	12.8	13.77	13.03	28.79	29.47	28.99	64.79	67.87	63.97	186.49	180.21	192.05
TR10_c8_g1	PREDICTED: vegetative incompatibility protein HET-E-1 [Nelumbo nucifera]	Protein JINGUBANG OS=Arabidopsis thaliana OX=3702 GN=JGB PE=1 SV=1	WD domain, G-beta repeat;PQQ-like domain	-	-	-	-	-	22.65	25.98	22.63	13.7	11.94	12.38	4.67	3.66	3.3	0.45	0.91	1.01
TR100_c0_g1	UDP-glucuronosyl/UDP-glucosyltransferase [Macleaya cordata]	UDP-glycosyltransferase 71K1 OS=Malus domestica OX=3750 GN=UGT71K1 PE=1 SV=1	UDP-glucoronosyl and UDP-glucosyl transferase	-	-	-	-	-	0.85	1.4	0.98	1.68	1.82	1.7	3.22	2.84	2.38	9.47	9.07	10.04
TR10003_c0_g1	mCG19129, partial [Mus musculus]	40S ribosomal protein S7 OS=Avicennia marina OX=82927 GN=RPS7 PE=2 SV=1	Ribosomal protein S7e	-	-	-	K02993|RP-S7e, RPS7; small subunit ribosomal protein S7e	ko03010(Genetic Information Processing)	29.83	7.21	8.81	2.48	1.37	4.26	5.74	4.21	3.05	2.58	1.1	1.9
TR1001_c0_g2	11-beta-hydroxysteroid dehydrogenase-like 5 [Papaver somniferum]	11-beta-hydroxysteroid dehydrogenase-like 5 OS=Arabidopsis thaliana OX=3702 GN=HSD5 PE=2 SV=1	short chain dehydrogenase;Enoyl-(Acyl carrier protein) reductase;KR domain	-	-	-	-	-	6.11	6	4.99	2.16	2.07	2	21.91	22.17	22.04	5.17	4.59	4.84
TR10016_c0_g1	hypothetical protein CK203_100103 [Vitis vinifera]	-	-	-	-	-	-	-	9.82	9.42	9.94	10.06	9.98	10.95	10.64	11.63	12.62	1.78	2.81	3.99
TR10017_c0_g1	hypothetical protein BVC80_8885g3 [Macleaya cordata]	-	-	-	-	-	-	-	4.24	4.32	3.98	3.93	3.74	3.97	4.31	5.08	5.2	9.32	10.36	9.39
TR1002_c0_g2	uncharacterized protein LOC112016851 [Quercus suber]	Retrovirus-related Pol polyprotein from transposon TNT 1-94 OS=Nicotiana tabacum OX=4097 PE=2 SV=1	-	-	-	-	-	-	1.91	1.56	1.91	1.75	2.35	2.28	2.85	2.62	2.89	0.79	0.64	0.61
TR1002_c0_g3	GIGANTEA [Macleaya cordata]	Protein GIGANTEA OS=Oryza sativa subsp. japonica OX=39947 GN=GI PE=2 SV=2	-	-	-	-	-	-	6.21	5.26	6.61	2.91	4.23	2.56	0.57	0.55	0.44	0.35	0.5	0.18
TR10020_c0_g1	DNA-directed RNA polymerase [Macleaya cordata]	DNA-directed RNA polymerases IV and V subunit 2 OS=Arabidopsis thaliana OX=3702 GN=NRPD2 PE=1 SV=1	RNA polymerase Rpb2, domain 6;RNA polymerase beta subunit;RNA polymerase Rpb2, domain 4;RNA polymerase Rpb2, domain 3;RNA polymerase Rpb2, domain 5;RNA polymerase Rpb2, domain 2;RNA polymerase Rpb2, domain 7;RNA polymerase Rpb2, domain 6	-	-	-	-	-	0.39	0.39	0.37	0.23	0.22	0.28	0.87	0.51	0.58	0.28	0.33	0.34
TR10021_c0_g1	hypothetical protein COLO4_36678 [Corchorus olitorius]	-	EF-hand domain pair;EF hand;EF hand;EF-hand domain	-	-	-	-	-	8.47	10.19	12.27	10.4	10.27	9.91	2.16	3.24	2.68	0.35	0.09	0.27
TR10025_c0_g1	Mlo-related protein [Macleaya cordata]	MLO-like protein 11 OS=Arabidopsis thaliana OX=3702 GN=MLO11 PE=2 SV=1	Mlo family;Mlo family	-	-	-	-	-	0.57	0.51	0.73	0.39	0.64	0.65	0.51	0.67	0.74	1.41	1.39	1.18
TR100274_c0_g1	oxidoreductase/transition metal ion-binding protein [Medicago truncatula]|RHN57251.1 hypothetical protein MtrunA17_Chr5g0438371 [Medicago truncatula]	-	-	-	-	-	-	-	320.62	259.96	285.57	224.89	228.71	233.11	26.72	23.58	55.26	20.42	26.37	16.58
TR10028_c0_g1	-	-	-	-	-	-	-	-	0.53	0.43	0.64	2.42	2.22	2.44	2.51	2.55	2.93	1.09	1.09	0.97
TR100286_c0_g1	Protein kinase domain [Macleaya cordata]	Putative cysteine-rich receptor-like protein kinase 35 OS=Arabidopsis thaliana OX=3702 GN=CRK35 PE=3 SV=3	-	-	-	-	-	-	0.07	0	0.09	1.03	1	0.94	0.52	0.84	0.98	0.11	0.05	0
TR10029_c0_g1	hypothetical protein AQUCO_01400160v1 [Aquilegia coerulea]	-	GrpE	-	-	-	-	-	7.45	9.03	9.47	7.84	7.15	7.89	6.66	6.91	6.67	13.71	13.61	14.59
TR10031_c1_g1	-	-	-	-	-	-	-	-	0.22	0.54	0.55	1.03	0.78	0.83	2.05	1.93	1.53	0.45	0.46	0.18
TR10033_c0_g1	H-2 class II histocompatibility antigen gamma chain [Rattus norvegicus]|CAA31450.1 unnamed protein product [Rattus norvegicus]|AAH59152.1 Cd74 molecule, major histocompatibility complex, class II invariant chain [Rattus norvegicus]|EDM14564.1 CD74 antigen (invariant polypeptide of major histocompatibility complex, class II antigen-associated), isoform CRA_c [Rattus norvegicus]|EDM14565.1 CD74 ant…	-	CLIP, MHC2 interacting;Class II MHC-associated invariant chain trimerisation domain	MAPK cascade;metabolic process;regulation of protein phosphorylation;positive regulation of protein phosphorylation;signal transduction;intracellular signal transduction;cellular protein modification process;protein phosphorylation;phosphorus metabolic process;phosphate-containing compound metabolic process;nitrogen compound metabolic process;cell communication;biological_process;positive regulat…	protein binding;molecular_function;binding;amide binding;peptide binding;transmembrane signaling receptor activity;signaling receptor activity;molecular transducer activity;transporter activity;transmembrane transporter activity;secondary active transmembrane transporter activity;active transmembrane transporter activity;cytokine binding;signaling receptor binding;MHC protein complex binding;MHC …	plasma membrane;intracellular;cellular_component;integral component of membrane;lytic vacuole;membrane;vacuole;extracellular region;extracellular space;cell;cytoplasm;endosome;late endosome;intracellular membrane-bounded organelle;cell surface;endomembrane system;intrinsic component of membrane;intrinsic component of plasma membrane;cytoplasmic vesicle;vesicle;protein-containing complex;MHC prote…	-	-	1.33	0.29	1.44	0.04	0	0	0.27	0.26	0.11	0	0.13	0
TR10035_c0_g1	hypothetical protein AQUCO_01400836v1 [Aquilegia coerulea]	Probable polygalacturonase At3g15720 OS=Arabidopsis thaliana OX=3702 GN=At3g15720 PE=3 SV=1	Glycosyl hydrolases family 28;Pectate lyase superfamily protein	-	-	-	-	-	3.99	4.04	4.09	9.67	9.09	10.06	8.39	10.29	9.74	12.02	13.37	13.92
TR1004_c0_g1	Protein kinase domain [Macleaya cordata]	Serine/threonine-protein kinase-like protein CCR4 OS=Arabidopsis thaliana OX=3702 GN=CCR4 PE=1 SV=1	Protein tyrosine kinase;Protein kinase domain;Regulator of chromosome condensation (RCC1) repeat	-	-	-	-	-	14.65	13.92	14.5	7.43	6.94	8.18	12.25	12.55	11.39	4.45	4.05	3.72
TR10042_c0_g1	Tetrapyrrole biosynthesis [Macleaya cordata]	-	Glutamyl-tRNAGlu reductase, dimerisation domain	-	-	-	-	-	37.28	32.62	39.42	8.86	10.31	10.05	8.6	8.94	8.63	4.97	4.2	3.63
TR10043_c0_g1	hypothetical protein AQUCO_01400261v1 [Aquilegia coerulea]	Beta-galactosidase 10 OS=Arabidopsis thaliana OX=3702 GN=BGAL10 PE=2 SV=1	Galactose binding lectin domain;Glycosyl hydrolases family 35;Glycosyl hydrolases family 35	-	-	-	-	-	3.01	3.02	3.3	3.01	3.31	3.42	4.13	3.92	3.85	9.99	9.62	9.58
TR10045_c0_g1	-	-	-	-	-	-	-	-	0.15	0.04	0.21	1.01	0.57	0.62	0.29	0.25	0.39	1.28	1.76	1.34
TR10046_c0_g1	Reverse transcriptase zinc-binding domain [Macleaya cordata]	-	-	-	-	-	-	-	0.96	0.97	0.89	1.4	1	1.04	0.88	1.07	0.99	0.18	0.24	0.25
TR100476_c0_g1	hypothetical protein AQUCO_06000061v1 [Aquilegia coerulea]	Serine carboxypeptidase-like 18 OS=Arabidopsis thaliana OX=3702 GN=SCPL18 PE=2 SV=2	Serine carboxypeptidase	-	-	-	-	-	0.4	0.76	0.46	1.02	0.96	1.09	1.44	0.9	1.07	13.07	13.36	13.39
TR100476_c1_g1	hypothetical protein AQUCO_00200904v1 [Aquilegia coerulea]	Serine carboxypeptidase-like 18 OS=Arabidopsis thaliana OX=3702 GN=SCPL18 PE=2 SV=2	Serine carboxypeptidase	-	-	-	-	-	0	0	0	0	0	0	1.5	1.12	1.14	0	0.03	0
TR10049_c1_g1	hypothetical protein AQUCO_00900161v1 [Aquilegia coerulea]	Squamosa promoter-binding-like protein 17 OS=Oryza sativa subsp. japonica OX=39947 GN=SPL17 PE=2 SV=2	SBP domain	-	-	-	-	-	0.94	0.84	1.39	1.44	1.05	1.56	0.29	0.44	0.69	0.97	0.79	0.82
TR10051_c0_g1	Retrovirus-related Pol polyprotein from transposon TNT 1-94 [Glycine soja]	-	-	-	-	-	-	-	1.75	1.7	2.08	0.31	0.73	0.4	0.38	0.59	0.51	0.07	0.1	0.32
TR10059_c0_g1	unnamed protein product [Mus musculus]	60S ribosomal protein L3 OS=Oryza sativa subsp. japonica OX=39947 GN=RPL3 PE=2 SV=2	Ribosomal protein L3	-	-	-	K02925|RP-L3e, RPL3; large subunit ribosomal protein L3e	ko03010(Genetic Information Processing)	8.32	1.47	1.79	0.49	0.37	0.46	1.62	1.56	1.11	0.47	0.45	0.19
TR1006_c0_g2	hypothetical protein BVC80_1543g274 [Macleaya cordata]	Iridoid synthase CYC2 OS=Camptotheca acuminata OX=16922 GN=CYC2 PE=1 SV=1	-	-	-	-	-	-	3.16	3.63	3.46	9.09	9.92	9.13	8.44	9.43	8.21	9.25	8.92	9.02
TR10061_c0_g1	UDP-glucuronosyl/UDP-glucosyltransferase [Macleaya cordata]	UDP-glycosyltransferase 71K1 OS=Malus domestica OX=3750 GN=UGT71K1 PE=1 SV=1	UDP-glucoronosyl and UDP-glucosyl transferase	-	-	-	-	-	0.56	0.41	0.39	0.63	0.41	0.46	0.85	0.7	0.8	0	0.05	0.11
TR10064_c0_g1	Bet v I domain [Macleaya cordata]	MLP-like protein 423 OS=Arabidopsis thaliana OX=3702 GN=MLP423 PE=2 SV=1	Pathogenesis-related protein Bet v I family;Polyketide cyclase / dehydrase and lipid transport	-	-	-	-	-	1.23	0.71	0.93	2.53	2.76	2.14	10.18	10.53	11.16	0.76	0.48	1.01
TR10064_c1_g1	Bet v I domain [Macleaya cordata]	-	Pathogenesis-related protein Bet v I family	-	-	-	-	-	5.96	7.29	6.91	43.29	52.14	50.59	15.98	16.54	18.68	29.21	32.04	35.55
TR10069_c0_g1	protein PLANT CADMIUM RESISTANCE 2-like [Durio zibethinus]	Protein PLANT CADMIUM RESISTANCE 2 OS=Arabidopsis thaliana OX=3702 GN=PCR2 PE=1 SV=1	-	-	-	-	-	-	157.4	168.96	142.18	148.58	147.44	153.8	271.68	288.81	290.45	104.95	102.02	103.39
TR10070_c0_g1	LRAT-like domain [Macleaya cordata]	-	-	-	-	-	-	-	1332.71	1356.58	1321.95	236.14	244.07	247.14	79.64	87.27	89.2	249.54	259.92	260.73
TR10074_c1_g1	-	-	-	-	-	-	-	-	0.11	0.11	0.13	0.13	0	0	1.07	1.09	0.71	0.54	0.3	0.23
TR10076_c0_g2	-	-	-	-	-	-	-	-	0.35	0.24	0	1.07	1.06	1.1	5.27	5.16	5.21	1.36	0.97	1.02
TR10080_c0_g1	PREDICTED: BTB/POZ domain-containing protein At2g24240-like [Nelumbo nucifera]	BTB/POZ domain-containing protein At2g24240 OS=Arabidopsis thaliana OX=3702 GN=At2g24240 PE=2 SV=1	BTB/POZ domain	-	-	-	-	-	2.79	2.6	2.74	2.96	2.99	2.62	0.83	0.96	0.63	0.7	0.44	0.6
TR100842_c0_g1	-	-	-	-	-	-	-	-	14.23	14.95	11.14	37.06	42.82	35.71	19.98	22.08	29.74	32.47	28.38	26.37
TR10088_c0_g2	hypothetical protein TSTA_040370 [Talaromyces stipitatus ATCC 10500]|EED14557.1 hypothetical protein TSTA_040370 [Talaromyces stipitatus ATCC 10500]	-	-	-	-	-	-	-	22.81	11.52	8.24	14.05	3.51	5.44	16.08	14.62	4.5	3.19	1.32	2.13
TR1009_c0_g1	probable LRR receptor-like serine/threonine-protein kinase At1g07650 [Quercus suber]	Probable LRR receptor-like serine/threonine-protein kinase At1g07650 OS=Arabidopsis thaliana OX=3702 GN=At1g07650 PE=1 SV=1	Leucine rich repeat;Leucine Rich repeats (2 copies);Leucine Rich Repeat;Protein tyrosine kinase;Protein kinase domain;Di-glucose binding within endoplasmic reticulum	-	-	-	-	-	16.25	17.8	17.93	8.37	8.46	8.27	10.54	10.47	10.27	2.2	1.78	2.22
TR1009_c2_g1	hypothetical protein BVC80_1801g3 [Macleaya cordata]	-	-	-	-	-	-	-	23.16	21.77	21.81	27.02	28.01	26.91	16.25	17.63	17.35	44.8	50.45	42.34
TR10093_c0_g1	PREDICTED: potassium transporter 6-like [Nelumbo nucifera]|XP_019052551.1 PREDICTED: potassium transporter 6-like [Nelumbo nucifera]|XP_019052552.1 PREDICTED: potassium transporter 6-like [Nelumbo nucifera]|XP_019052553.1 PREDICTED: potassium transporter 6-like [Nelumbo nucifera]	Potassium transporter 6 OS=Arabidopsis thaliana OX=3702 GN=POT6 PE=2 SV=1	K+ potassium transporter;K+ potassium transporter	-	-	-	-	-	1.18	1.27	0.84	0.81	0.77	0.89	2.15	2.61	2.56	1.02	0.91	0.86
TR10097_c0_g1	protein NRT1/ PTR FAMILY 6.3 [Rosa chinensis]|PRQ18148.1 putative nitrate-transporting ATPase [Rosa chinensis]	Protein NRT1/ PTR FAMILY 6.3 OS=Arabidopsis thaliana OX=3702 GN=NPF6.3 PE=1 SV=1	POT family	-	-	-	-	-	1.72	1.99	2.14	8.27	9.34	9.78	6.78	6.29	6.03	2.97	2.5	2.31
TR10099_c0_g1	-	Protein RETICULATA-RELATED 4, chloroplastic OS=Arabidopsis thaliana OX=3702 GN=RER4 PE=2 SV=1	-	-	-	-	-	-	6.46	6.49	6.27	0.75	0.58	0.91	0.61	0.52	1.08	0.75	0.62	0.75
TR100994_c0_g1	hypothetical protein A0H81_15016 [Grifola frondosa]	-	-	-	-	-	-	-	15.23	3.65	20.19	1.58	4.18	0.7	11.25	0.63	1.99	2.52	1.32	0.61
TR1010_c0_g3	-	-	-	-	-	-	-	-	0.6	2.44	0.78	7.07	7	4	0	0.39	0	3.97	0.88	2.87
TR1010_c2_g1	-	-	-	-	-	-	-	-	5.99	3.73	5.09	0.79	0.13	0.56	0.57	0.82	0.72	0.52	1.15	0.17
TR1010_c3_g1	-	-	-	-	-	-	-	-	0.19	0.37	0.44	0.76	0.21	0.54	2.5	3.43	4.34	0.94	1.15	0.67
TR10101_c0_g1	PREDICTED: sugar transport protein 13 [Tarenaya hassleriana]	Sugar transport protein MST4 OS=Oryza sativa subsp. japonica OX=39947 GN=MST4 PE=1 SV=1	-	-	-	-	-	-	13.74	14.87	12.77	26.89	27.57	24.84	19.23	15.31	18.47	9.8	9.55	8.03
TR10104_c0_g1	VQ [Macleaya cordata]	-	VQ motif	-	-	-	-	-	3.24	7.13	6.78	2.18	2.08	2.55	6.43	8.07	7.75	1.8	2.02	1.58
TR10105_c1_g1	Uncharacterized protein TCM_042836 [Theobroma cacao]	Zinc finger protein ZAT11 OS=Arabidopsis thaliana OX=3702 GN=ZAT11 PE=2 SV=1	C2H2-type zinc finger;C2H2-type zinc finger	-	-	-	-	-	128.8	131.9	140.25	118.69	114.62	113.77	57.64	61.66	61.17	15.84	15.71	16.18
TR10106_c0_g1	hypothetical protein BVC80_917g31 [Macleaya cordata]	-	-	-	-	-	-	-	10.6	12.77	13.69	8.05	7.39	8.05	9.29	11.57	12.75	24.93	23.63	24
TR1011_c0_g4	cytochrome P450 CYP716A249 [Polygala tenuifolia]|BBE15472.1 cytochrome P450 [Polygala tenuifolia]	Beta-amyrin 28-monooxygenase OS=Vitis vinifera OX=29760 GN=CYP716A15 PE=1 SV=1	Cytochrome P450	-	-	-	-	-	2.96	3.1	2.04	1.73	2.21	2.88	12.08	13	10.18	10.19	10.43	9.84
TR1011_c1_g1	PREDICTED: beta-amyrin 28-oxidase [Theobroma cacao]	Beta-amyrin 28-monooxygenase OS=Vitis vinifera OX=29760 GN=CYP716A15 PE=1 SV=1	Cytochrome P450	-	-	-	-	-	29.98	30.72	32.05	24.6	25.02	26	34.62	35.71	34.48	8.31	7.22	8.21
TR1011_c2_g1	Beta-amyrin 28-oxidase [Actinidia chinensis var. chinensis]|PSS02546.1 Beta-amyrin 28-oxidase [Actinidia chinensis var. chinensis]	Beta-amyrin 28-monooxygenase OS=Vitis vinifera OX=29760 GN=CYP716A15 PE=1 SV=1	Cytochrome P450	-	-	-	-	-	9.86	11.6	11.39	10.76	10.94	10.53	35.29	32.95	34.88	30.51	29.07	27.11
TR10119_c0_g2	PREDICTED: putative disease resistance protein At4g19050 isoform X1 [Nelumbo nucifera]	Putative disease resistance protein At4g19050 OS=Arabidopsis thaliana OX=3702 GN=At4g19050 PE=3 SV=2	Leucine Rich repeats (2 copies);NB-ARC domain;Leucine rich repeat	-	-	-	-	-	1.24	0.95	1.03	0.45	0.36	0.36	0.67	0.65	0.61	0.45	0.51	0.44
TR10120_c0_g1	SLC25A5 protein, partial [Homo sapiens]	ADP,ATP carrier protein OS=Parachlorella kessleri OX=3074 PE=3 SV=1	Mitochondrial carrier protein	-	-	-	K05863|SLC25A4S, ANT; solute carrier family 25 (mitochondrial adenine nucleotide translocator), member 4/5/6/31	ko04020(Environmental Information Processing);ko04022(Environmental Information Processing);ko04217(Cellular Processes);ko04218(Cellular Processes)	4.65	1.38	1.6	0.49	0.48	0.34	0.89	0.6	0.41	0.12	0.15	0.18
TR10123_c0_g1	-	-	-	-	-	-	-	-	3.14	3.48	2.77	9.01	10.19	9.65	5.16	4.97	5.23	8.39	7.5	9.11
TR10124_c0_g1	beta-2-microglobulin precursor [Rattus norvegicus]|P07151.1 RecName: Full=Beta-2-microglobulin	-	Immunoglobulin C1-set domain	tissue homeostasis;biological_process;multicellular organismal process;homeostatic process;multicellular organismal homeostasis;anatomical structure homeostasis;biological regulation;regulation of biological quality;cell killing;leukocyte mediated cytotoxicity;regulation of leukocyte mediated cytotoxicity;positive regulation of leukocyte mediated cytotoxicity;T cell mediated cytotoxicity;regulati…	protein binding;molecular_function;binding;identical protein binding	plasma membrane;intracellular;cellular_component;membrane;extracellular region;extracellular space;cell;cytoplasm;intracellular membrane-bounded organelle;adherens junction;cell-substrate adherens junction;cell surface;endomembrane system;cell junction;cell-substrate junction;vesicle;protein-containing complex;MHC protein complex;organelle;membrane-bounded organelle;intracellular organelle;extrac…	-	-	3.75	0.79	1.93	0.21	0.2	0.17	0.8	0.75	0.63	0.29	0.14	0.08
TR10126_c2_g1	-	-	-	-	-	-	-	-	0	0.59	0.18	1.84	1.83	2.09	0.18	0	0.18	1.08	0.81	0.65
TR101336_c0_g1	PREDICTED: protocadherin-7 [Bos mutus]	-	Cadherin domain	-	-	-	-	-	2.02	0.27	0.19	0.04	0	0	0.06	0.09	0.13	0	0	0
TR10136_c2_g1	fibrinogen alpha chain isoform 1 precursor [Rattus norvegicus]|XP_006232595.1 PREDICTED: fibrinogen alpha chain isoform X2 [Rattus norvegicus]|AAP78769.1 Ac1873 [Rattus norvegicus]|EDM00839.1 rCG62551 [Rattus norvegicus]	-	Fibrinogen beta and gamma chains, C-terminal globular domain;Fibrinogen alpha/beta chain family;Fibrinogen alpha C domain	immune system process;immune response;biological_process;response to stimulus;acute inflammatory response;defense response;response to stress;inflammatory response;cell adhesion;biological adhesion;cell-substrate adhesion;response to chemical;response to radiation;response to abiotic stimulus;response to ionizing radiation;movement of cell or subcellular component;cellular process;muscle cell mig…	protein binding;molecular_function;binding;molecular adaptor activity;ion binding;cation binding;structural molecule activity;signaling receptor binding;metal ion binding;cell adhesion molecule binding;protein binding, bridging	plasma membrane;intracellular;cellular_component;membrane;extracellular region;extracellular space;cell;cytoplasm;endoplasmic reticulum;intracellular membrane-bounded organelle;secretory granule;cell surface;endomembrane system;cytoplasmic vesicle;vesicle;protein-containing complex;organelle;membrane-bounded organelle;intracellular organelle;extracellular organelle;extracellular region part;intra…	-	-	5.55	1.65	1.07	0.44	0.38	0.61	1.15	1.15	0.79	0.17	0.27	0.2
TR10138_c0_g1	PREDICTED: F-box protein PP2-B15-like [Nelumbo nucifera]	F-box protein PP2-B15 OS=Arabidopsis thaliana OX=3702 GN=PP2B15 PE=2 SV=2	Phloem protein 2	-	-	-	-	-	5.52	5.92	6.53	3.09	4.08	2.43	8.13	7	7.16	2.17	1.99	1.32
TR1014_c1_g2	PREDICTED: dirigent protein 22-like [Nelumbo nucifera]	Dirigent protein 3 OS=Arabidopsis thaliana OX=3702 GN=DIR3 PE=3 SV=1	Dirigent-like protein	-	-	-	-	-	6.4	5.07	5.43	9.64	8.44	8.4	23.31	22.33	24.8	61.56	68.26	60.83
TR1014_c1_g3	hypothetical protein AQUCO_02800162v1 [Aquilegia coerulea]	Beta-amyrin synthase OS=Betula platyphylla OX=78630 GN=OSCBPY PE=1 SV=1	Squalene-hopene cyclase C-terminal domain;Prenyltransferase and squalene oxidase repeat;Squalene-hopene cyclase N-terminal domain;A-macroglobulin complement component;Pectic acid lyase	-	-	-	K15813|LUP4; beta-amyrin synthase [EC:5.4.99.39]	ko00909(Metabolism);ko01110(Metabolism)	11.69	11.85	13.11	0.13	0.21	0.18	3.46	4.14	4.06	0.49	0.55	0.57
TR10144_c0_g1	uncharacterized protein LOC110424307 [Herrania umbratica]	G-type lectin S-receptor-like serine/threonine-protein kinase At4g27290 OS=Arabidopsis thaliana OX=3702 GN=At4g27290 PE=3 SV=4	D-mannose binding lectin;S-locus glycoprotein domain;PAN-like domain	-	-	-	-	-	0.42	0.5	0.55	0.51	0.58	0.46	1.38	1.7	1.85	0.48	0.5	0.52
TR10146_c0_g2	PREDICTED: heat shock factor protein HSF30 isoform X1 [Fragaria vesca subsp. vesca]	Heat shock factor protein HSF30 OS=Solanum peruvianum OX=4082 GN=HSF30 PE=2 SV=1	HSF-type DNA-binding	-	-	-	-	-	0.1	0.36	0.24	0.21	0.28	0.29	3.38	2.97	2.3	0.5	0.48	0.36
TR10148_c0_g1	PREDICTED: F-box protein AFR-like [Nelumbo nucifera]	F-box protein AFR OS=Arabidopsis thaliana OX=3702 GN=AFR PE=1 SV=2	-	-	-	-	-	-	36.19	31.31	37.82	49.23	40.74	43.89	10.67	14.79	16.14	10.13	11.23	8.35
TR101506_c0_g1	PREDICTED: zinc finger CCCH domain-containing protein 2-like [Nelumbo nucifera]	Zinc finger CCCH domain-containing protein 2 OS=Arabidopsis thaliana OX=3702 GN=At1g03790 PE=2 SV=1	Zinc finger C-x8-C-x5-C-x3-H type (and similar)	-	-	-	-	-	0.13	0.08	0.1	0.1	0.09	0	2.23	2.2	1.76	0.48	0.35	0.66
TR10152_c0_g2	Protein of unknown function DUF810 [Macleaya cordata]	-	Plant family of unknown function (DUF810)	-	-	-	-	-	0.34	0.96	1.19	0	0	0.08	0.39	0.15	0.57	0	0.28	0.1
TR10153_c0_g1	-	-	-	-	-	-	-	-	0.62	0.41	0.61	3.48	3	3.83	2.42	3.22	2.84	0.74	0.99	1.64
TR10154_c0_g1	Cytochrome P450 isoform 1 [Theobroma cacao]	Cytochrome P450 714C2 OS=Oryza sativa subsp. japonica OX=39947 GN=CYP714C2 PE=2 SV=1	Cytochrome P450	-	-	-	-	-	0.12	0.18	0.27	1.65	1.74	1.64	1.32	2.01	2.37	3.92	3.61	3.28
TR101547_c0_g1	Protein kinase domain [Macleaya cordata]	Leucine-rich repeat receptor protein kinase MSP1 OS=Oryza sativa subsp. japonica OX=39947 GN=MSP1 PE=1 SV=1	Protein kinase domain;Protein tyrosine kinase;Leucine rich repeat;Leucine Rich repeats (2 copies);Leucine Rich Repeat	-	-	-	-	-	0.06	0.03	0.03	0	0.03	0	0.41	0.55	0.82	0.16	0.3	0.12
TR101588_c0_g1	rCG50972 [Rattus norvegicus]	-	MAC/Perforin domain;Low-density lipoprotein receptor domain class A	-	-	-	-	-	1.98	0.44	0.27	0.05	0.1	0.2	0.1	0.26	0.24	0	0.04	0.04
TR1016_c0_g1	UDP-glucuronosyl/UDP-glucosyltransferase [Macleaya cordata]	Scopoletin glucosyltransferase OS=Nicotiana tabacum OX=4097 GN=TOGT1 PE=1 SV=1	UDP-glucoronosyl and UDP-glucosyl transferase	-	-	-	-	-	359.53	359.72	375.38	229.08	214.31	226.03	63.34	59.88	62.85	21.54	21.8	20.9
TR1016_c1_g1	UDP-glucuronosyl/UDP-glucosyltransferase [Macleaya cordata]	-	-	-	-	-	-	-	8.43	8.92	9.35	7.06	6.45	6.25	13.05	13.01	14.66	2.1	1.82	1.58
TR1016_c2_g1	hypothetical protein AQUCO_00100790v1 [Aquilegia coerulea]	UDP-glucose flavonoid 3-O-glucosyltransferase 7 OS=Fragaria ananassa OX=3747 GN=GT7 PE=1 SV=1	-	-	-	-	-	-	191.6	180.47	229.16	16.1	25.89	17.89	10.09	11.83	14.61	40.77	33.92	30.94
TR1016_c2_g2	UDP-glucuronosyl/UDP-glucosyltransferase [Macleaya cordata]	Zeatin O-glucosyltransferase OS=Phaseolus lunatus OX=3884 GN=ZOG1 PE=2 SV=1	UDP-glucoronosyl and UDP-glucosyl transferase	-	-	-	K13495|CISZOG; cis-zeatin O-glucosyltransferase [EC:2.4.1.215]	ko00908(Metabolism)	24.48	24.07	24.93	18.21	17.57	16.04	43.44	40.61	43.61	14.02	14.59	14.43
TR1016_c2_g3	-	-	-	-	-	-	-	-	77.39	77.77	69.77	0.96	2.43	3.05	6.16	2.73	5.34	12.61	13.12	12.48
TR101632_c0_g3	BRCT domain [Macleaya cordata]	Protein BREAST CANCER SUSCEPTIBILITY 1 homolog OS=Arabidopsis thaliana OX=3702 GN=BRCA1 PE=1 SV=1	BRCT domain, a BRCA1 C-terminus domain;PHD-like zinc-binding domain;BRCA1 C Terminus (BRCT) domain;PHD-zinc-finger like domain	-	-	-	K10683|BARD1; BRCA1-associated RING domain protein 1	ko03440(Genetic Information Processing)	1.23	1.04	0.98	0.06	0.05	0.05	0.17	0.25	0.17	0.24	0.15	0.27
TR10170_c1_g1	hypothetical protein AQUCO_02500258v1 [Aquilegia coerulea]	WAT1-related protein At3g28050 OS=Arabidopsis thaliana OX=3702 GN=At3g28050 PE=2 SV=1	EamA-like transporter family	-	-	-	-	-	0.93	1.43	0.58	2.28	2.5	2.14	1.97	1.98	1.7	1.5	2.12	1.32
TR10173_c0_g1	hypothetical protein AQUCO_01800149v1 [Aquilegia coerulea]	-	Protein of unknown function, DUF599	-	-	-	-	-	4.5	5.86	4.15	1.24	1.63	1.54	8.3	9.42	8.93	12.62	11.04	14.1
TR10176_c0_g1	hypothetical protein AQUCO_01500236v1 [Aquilegia coerulea]	UDP-glycosyltransferase 74G1 OS=Stevia rebaudiana OX=55670 GN=UGT74G1 PE=1 SV=1	-	-	-	-	-	-	3.99	6.76	3.04	5.66	4.75	7.82	10.45	11.32	11.82	3.44	1.75	2.49
TR10178_c0_g1	PREDICTED: aspartyl protease family protein At5g10770-like [Nelumbo nucifera]	Aspartyl protease AED1 OS=Arabidopsis thaliana OX=3702 GN=AED1 PE=2 SV=1	Xylanase inhibitor C-terminal	-	-	-	-	-	22.13	25.46	15.84	5.06	5.64	6.19	32.9	35.18	40.55	21.74	19.41	17.25
TR10181_c0_g1	dynamin-related protein 1E-like [Hevea brasiliensis]	Dynamin-related protein 1E OS=Arabidopsis thaliana OX=3702 GN=DRP1E PE=1 SV=1	-	-	-	-	-	-	2.41	2.32	1.73	2.92	2.95	3.46	2.55	3.84	2.52	0.8	0.63	0.81
TR10183_c0_g1	uncharacterized protein LOC113330930 [Papaver somniferum]	Signal peptide peptidase OS=Arabidopsis thaliana OX=3702 GN=SPP PE=2 SV=1	-	-	-	-	-	-	0.7	0.59	0.63	1.24	1.12	1.25	1.04	1.23	1.09	0.74	0.83	0.79
TR10186_c1_g1	The fantastic four family [Macleaya cordata]	-	Fantastic Four meristem regulator	-	-	-	-	-	6.37	6.31	7.09	2.24	1.44	1.62	1.33	1.14	0.91	0.38	0.58	0.7
TR10186_c2_g1	PREDICTED: uncharacterized protein LOC104593592 [Nelumbo nucifera]	-	Methyltransferase domain;Cephalosporin hydroxylase	-	-	-	-	-	1.8	1.97	1.89	1.36	1.86	1.33	1.54	1.58	1.6	5.56	6.07	4.46
TR10188_c0_g1	Magnesium chelatase [Macleaya cordata]	Spermidine sinapoyl-CoA acyltransferase OS=Arabidopsis thaliana OX=3702 GN=SDT PE=1 SV=1	Transferase family	-	-	-	-	-	0.61	1.06	1.4	6.69	6.13	5.64	1.21	0.81	0.84	0.36	0.26	0.23
TR1019_c1_g1	uncharacterized protein LOC107010615 [Solanum pennellii]	-	Domain of unknown function (DUF4228)	-	-	-	-	-	38.09	38.4	36.68	8.65	9.96	8.69	6.32	6.07	7.86	3.46	5.32	4.99
TR10193_c1_g1	acetyl-CoA carboxylase alpha-CT subunit [Jatropha curcas]	Acetyl-coenzyme A carboxylase carboxyl transferase subunit alpha, chloroplastic OS=Arabidopsis thaliana OX=3702 GN=CAC3 PE=1 SV=1	Acetyl co-enzyme A carboxylase carboxyltransferase alpha subunit;Carboxyl transferase domain	-	-	-	K01962|accA; acetyl-CoA carboxylase carboxyl transferase subunit alpha [EC:6.4.1.2 2.1.3.15]	ko00061(Metabolism);ko00620(Metabolism);ko00640(Metabolism);ko00720(Metabolism);ko01100(Metabolism);ko01110(Metabolism);ko01120(Metabolism);ko01200(Metabolism);ko01212(Metabolism)	9.47	10.33	10.3	13.18	12.77	12.71	16	15.53	15.45	27.86	29.13	27.02
TR10193_c2_g1	-	-	-	-	-	-	-	-	2.37	3.28	2.29	3.2	2.74	3.85	4.65	4.68	4.78	1.17	1	1.29
TR10194_c0_g1	hypothetical protein AQUCO_01400178v1 [Aquilegia coerulea]	-	MORN repeat	-	-	-	-	-	6.03	5.89	5.1	5.44	5.2	5.37	1.43	1.88	1.79	2.5	1.95	2.45
TR10196_c0_g1	PREDICTED: ethylene-responsive transcription factor 9-like [Nelumbo nucifera]	Ethylene-responsive transcription factor 9 OS=Arabidopsis thaliana OX=3702 GN=ERF9 PE=2 SV=1	AP2 domain	-	-	-	-	-	10.91	10.45	9.7	5.82	5.52	7.39	7.6	5.74	7.33	1.28	1.31	1.45
TR10198_c0_g1	-	-	-	-	-	-	-	-	0.99	0.74	0.5	1.02	1.35	1.24	0.15	0.48	0.21	0.25	0.44	0.5
TR10198_c0_g2	-	-	-	-	-	-	-	-	0.42	0.1	0.12	1.3	0.84	1.43	0.35	0.92	0.18	0.36	0.21	0
TR102_c0_g1	NAC domain [Macleaya cordata]	-	-	-	-	-	-	-	80.77	85.8	79.95	55.35	59.98	60.78	38.97	41.11	39.44	18.57	16.55	15.26
TR102_c5_g1	Autophagy-related protein Atg8 family [Macleaya cordata]	Autophagy-related protein 8f OS=Arabidopsis thaliana OX=3702 GN=ATG8F PE=1 SV=1	Autophagy protein Atg8 ubiquitin like;Ubiquitin-like autophagy protein Apg12	-	-	-	K08341|GABARAP, ATG8, LC3; GABA(A) receptor-associated protein	ko04068(Environmental Information Processing);ko04136(Cellular Processes);ko04137(Cellular Processes);ko04138(Cellular Processes);ko04139(Cellular Processes);ko04140(Cellular Processes);ko04212(Organismal Systems);ko04621(Organismal Systems);ko04727(Organismal Systems)	104.46	100.89	105.99	93.23	87.65	90.72	140.24	139.2	147.93	301.4	301.24	288.92
TR10200_c0_g1	probable calcium-binding protein CML31 [Dendrobium catenatum]|PKU62900.1 putative calcium-binding protein CML31 [Dendrobium catenatum]	Probable calcium-binding protein CML41 OS=Arabidopsis thaliana OX=3702 GN=CML41 PE=2 SV=2	-	-	-	-	-	-	23.17	22.23	21.02	0	0.65	0	1.49	0.36	3.43	0	0	0
TR102060_c0_g1	PREDICTED: cytochrome P450 CYP72A219-like [Nelumbo nucifera]	Cytochrome P450 72A15 OS=Arabidopsis thaliana OX=3702 GN=CYP72A15 PE=2 SV=1	-	-	-	-	-	-	22.04	21.62	29.38	38.51	36.45	35.24	24.76	29.67	20.96	50.6	58.11	48.35
TR10209_c2_g2	Exocyst complex protein Exo70 [Macleaya cordata]	Exocyst complex component EXO70B2 OS=Arabidopsis thaliana OX=3702 GN=EXO70B2 PE=1 SV=1	Exo70 exocyst complex subunit	-	-	-	K07195|EXOC7, EXO70; exocyst complex component 7	ko04910(Organismal Systems)	19.05	18.74	19.44	28.15	28.59	28.53	15.42	14.6	14.9	15.1	13.62	14.12
TR10211_c0_g1	hypothetical protein BVC80_205g71 [Macleaya cordata]	-	-	-	-	-	-	-	3.43	3.1	2.56	1.32	1.28	0.93	9	7.85	12.29	0.99	1.02	0.83
TR102116_c0_g1	hypothetical protein BVC80_1289g75 [Macleaya cordata]	-	-	-	-	-	-	-	0	0	0.07	0.5	0.48	0.42	0	0	0	0.09	0.08	0
TR102118_c0_g1	-	-	-	-	-	-	-	-	0	0	0	1.1	0.9	1.41	0.63	1.45	1.12	0	0.18	0.19
TR102142_c0_g1	-	-	-	-	-	-	-	-	2.64	3.43	3.14	0.39	1.22	2.01	5	4.29	5.2	0.45	0.96	2.04
TR1022_c0_g3	-	-	-	-	-	-	-	-	2.17	1.24	1.59	15.77	16.96	15.61	10.22	9.62	14.04	6.07	5.69	7.1
TR10224_c0_g1	PREDICTED: integrin beta-2 isoform X1 [Macaca mulatta]	-	Integrin beta chain VWA domain;Integrin beta tail domain;Integrin beta cytoplasmic domain;Integrin plexin domain	-	-	-	-	-	3.53	0.93	0.9	0.1	0.12	0.14	0.45	0.25	0.13	0	0.02	0.1
TR102257_c0_g1	hypothetical protein A4T49_25850 [Klebsiella pneumoniae]|ORD56646.1 hypothetical protein A4T49_15995 [Klebsiella pneumoniae]	-	-	-	-	-	-	-	74.65	31.74	49.05	10.58	8.74	16.51	64.22	15.35	41.8	19.2	11.02	2.46
TR10228_c0_g1	PREDICTED: aspartyl protease family protein 2-like [Nelumbo nucifera]	Aspartyl protease family protein 2 OS=Arabidopsis thaliana OX=3702 GN=APF2 PE=2 SV=1	Xylanase inhibitor N-terminal;Xylanase inhibitor C-terminal;Eukaryotic aspartyl protease	-	-	-	-	-	4.9	5.18	4.48	1.01	0.83	0.86	6.57	5.51	4.86	2.15	2.36	2.66
TR10229_c1_g1	Leucine-rich repeat (LRR) protein associated with apoptosis in muscle tissue [Handroanthus impetiginosus]	Probable LRR receptor-like serine/threonine-protein kinase At1g07650 OS=Arabidopsis thaliana OX=3702 GN=At1g07650 PE=1 SV=1	Di-glucose binding within endoplasmic reticulum	-	-	-	-	-	2.06	2.82	1.57	0.31	0.42	0.45	3.83	4.03	3.14	0.28	0.26	0
TR10231_c0_g1	-	-	-	-	-	-	-	-	0.19	0	0.44	3.41	3.33	4.41	2.89	1.61	2.88	1.09	0.64	0.61
TR102328_c0_g1	PREDICTED: regulator of G-protein signaling 18 [Macaca mulatta]|XP_005540319.1 PREDICTED: regulator of G-protein signaling 18 [Macaca fascicularis]|XP_011744742.1 regulator of G-protein signaling 18 isoform X2 [Macaca nemestrina]|XP_025257000.1 regulator of G-protein signaling 18 [Theropithecus gelada]|XP_025257009.1 regulator of G-protein signaling 18 [Theropithecus gelada]|EHH15713.1 hypothetic…	-	Regulator of G protein signaling domain	-	-	-	-	-	1.5	0.4	0.44	0.04	0.04	0.12	0.31	0.16	0.09	0	0.03	0.06
TR10237_c0_g1	-	-	-	-	-	-	-	-	102.93	85.13	93.36	23.12	29.84	26.38	24.96	29.09	29.97	6.84	6.8	10.69
TR10240_c0_g1	Transposon Tf2-12 polyprotein [Vitis vinifera]	Uncharacterized mitochondrial protein AtMg00860 OS=Arabidopsis thaliana OX=3702 GN=AtMg00860 PE=4 SV=1	Reverse transcriptase (RNA-dependent DNA polymerase);Retrotransposon gag protein;Integrase core domain;Chromo (CHRromatin Organisation MOdifier) domain	-	-	-	-	-	0.29	0.4	0.17	0.84	0.57	0.75	0.82	0.79	0.76	0.83	0.85	0.84
TR1025_c0_g1	peroxisomal (S)-2-hydroxy-acid oxidase isoform X1 [Quercus suber]	(S)-2-hydroxy-acid oxidase GLO1 OS=Arabidopsis thaliana OX=3702 GN=GLO1 PE=1 SV=1	FMN-dependent dehydrogenase;Nitronate monooxygenase;IMP dehydrogenase / GMP reductase domain;FMN-dependent dehydrogenase	-	-	-	K11517|HAO; (S)-2-hydroxy-acid oxidase [EC:1.1.3.15]	ko00630(Metabolism);ko01100(Metabolism);ko01110(Metabolism);ko01120(Metabolism);ko01200(Metabolism);ko04146(Cellular Processes)	8.08	8.77	8.88	15.17	15.94	16.47	18.59	19.12	17.59	38.17	37.43	40.15
TR10250_c0_g1	-	-	-	-	-	-	-	-	0.25	0.35	0.32	0.56	0.48	0.59	1.12	1.3	1.5	0.5	0.43	0.52
TR1026_c0_g2	PREDICTED: fructose-1,6-bisphosphatase, chloroplastic-like [Nelumbo nucifera]	Fructose-1,6-bisphosphatase 1, chloroplastic OS=Arabidopsis thaliana OX=3702 GN=CFBP1 PE=1 SV=2	Fructose-1-6-bisphosphatase, N-terminal domain	-	-	-	K03841|FBP, fbp; fructose-1,6-bisphosphatase I [EC:3.1.3.11]	ko00010(Metabolism);ko00030(Metabolism);ko00051(Metabolism);ko00680(Metabolism);ko00710(Metabolism);ko01100(Metabolism);ko01110(Metabolism);ko01120(Metabolism);ko01200(Metabolism);ko04152(Environmental Information Processing);ko04910(Organismal Systems);ko04922(Organismal Systems)	32.14	35.6	32.97	16.98	17.74	16.15	10.62	9.03	9.22	1.99	2.08	2.1
TR102637_c0_g1	-	-	-	-	-	-	-	-	0.64	0	3.57	10.53	13.22	6	0.81	5.45	3.48	23.74	22.17	20.98
TR10264_c1_g1	-	-	-	-	-	-	-	-	0	0	0	0.44	0.42	0.43	0.13	0.12	0.39	0	0.04	0.16
TR10267_c0_g1	hypothetical protein AQUCO_03000379v1 [Aquilegia coerulea]	Protein PHLOEM PROTEIN 2-LIKE A1 OS=Arabidopsis thaliana OX=3702 GN=PP2A1 PE=2 SV=1	Phloem protein 2	-	-	-	-	-	16.34	18.07	18.53	4.58	4.56	3.69	9.25	10.76	10.91	9.56	9.74	10.57
TR10267_c2_g2	-	-	-	-	-	-	-	-	0.78	0.72	0.99	0.37	0.51	0.3	2.19	1.79	1.95	0.28	0.13	0.56
TR1027_c0_g1	40S ribosomal protein SA [Heterocephalus glaber]	40S ribosomal protein SA OS=Vitis vinifera OX=29760 GN=GSVIVT00034021001 PE=3 SV=1	40S ribosomal protein SA C-terminus;Ribosomal protein S2	-	-	-	K02998|RP-SAe, RPSA; small subunit ribosomal protein SAe	ko03010(Genetic Information Processing)	43.77	9.51	11.8	3.32	4.05	5.03	11.25	3.62	4.61	3.6	1.16	4.17
TR10270_c1_g1	hypothetical protein AQUCO_03300088v1 [Aquilegia coerulea]	Polygalacturonase inhibitor OS=Pyrus communis OX=23211 GN=PGIP PE=1 SV=1	-	-	-	-	-	-	6.1	4.47	7.36	1.29	2.17	2.06	3.94	3.75	6.43	0	0.53	0
TR10271_c0_g1	hypothetical protein AQUCO_03000267v1 [Aquilegia coerulea]	Protein DMR6-LIKE OXYGENASE 2 OS=Arabidopsis thaliana OX=3702 GN=DLO2 PE=2 SV=1	2OG-Fe(II) oxygenase superfamily;non-haem dioxygenase in morphine synthesis N-terminal	-	-	-	-	-	4.68	6.64	4.88	6.45	6.17	6.11	6.33	6.5	6.03	13.45	12.16	13.02
TR10273_c0_g1	hypothetical protein AQUCO_00400097v1 [Aquilegia coerulea]	Purple acid phosphatase 22 OS=Arabidopsis thaliana OX=3702 GN=PAP22 PE=2 SV=1	Calcineurin-like phosphoesterase;Purple acid Phosphatase, N-terminal domain	-	-	-	-	-	1.2	1.33	0.95	6.07	5.77	6.18	12.54	12.26	11.59	15.98	13.97	14.13
TR10277_c0_g1	-	-	-	-	-	-	-	-	1.57	2.91	1.88	19.04	17.82	17.47	12.81	14.74	15.91	10.85	8.96	13.87
TR10284_c0_g1	Glycoside hydrolase [Macleaya cordata]	Vicianin hydrolase (Fragment) OS=Vicia sativa subsp. nigra OX=3909 PE=1 SV=1	Glycosyl hydrolase family 1	-	-	-	K01188|E3.2.1.21; beta-glucosidase [EC:3.2.1.21]	ko00460(Metabolism);ko00500(Metabolism);ko00940(Metabolism);ko01100(Metabolism);ko01110(Metabolism)	9.16	9.19	8.34	2.93	4.13	3.28	4.47	5.16	6.37	6.18	5.82	6.61
TR10288_c0_g2	cytochrome c oxidase subunit 4 isoform 1, mitochondrial isoform 1 [Mus musculus]	-	Cytochrome c oxidase subunit IV	-	-	-	-	-	6.85	3.07	3.69	0.68	0.83	0.86	3.24	1.98	1	1.06	0.25	0.4
TR10289_c1_g1	Cation efflux protein [Macleaya cordata]	Metal tolerance protein 10 OS=Arabidopsis thaliana OX=3702 GN=MTP10 PE=2 SV=1	Cation efflux family;Dimerisation domain of Zinc Transporter	-	-	-	-	-	44.68	47.25	44.08	20.9	19.73	22.58	28.27	29.16	27.01	9.07	8.11	8.44
TR102892_c0_g2	-	-	-	-	-	-	-	-	1.41	0.35	0.07	0.08	0	0	0.18	0.14	0.04	0	0.07	0
TR10291_c0_g2	hypothetical protein AQUCO_01300379v1 [Aquilegia coerulea]	Leucine-rich repeat receptor protein kinase EMS1 OS=Arabidopsis thaliana OX=3702 GN=EMS1 PE=1 SV=1	Leucine rich repeat;Protein kinase domain;Protein tyrosine kinase;Leucine Rich repeats (2 copies);Leucine Rich Repeat;Leucine rich repeat N-terminal domain	-	-	-	-	-	0.52	0.53	0.71	0.86	0.85	0.86	1.86	1.7	1.88	4.58	4.34	4.64
TR10292_c0_g3	-	-	-	-	-	-	-	-	4.39	4.96	3.64	4.46	4.46	4.14	10.83	9.76	8.26	6.86	6.14	5.72
TR10294_c0_g1	RNA-binding [Macleaya cordata]	CRS2-associated factor 2, mitochondrial OS=Arabidopsis thaliana OX=3702 GN=At5g54890 PE=2 SV=1	CRS1 / YhbY (CRM) domain	-	-	-	-	-	1.72	1.67	2.13	1.16	0.96	1.3	0.76	0.52	0.45	1.86	1.7	1.51
TR10296_c0_g1	Forkhead-associated (FHA) domain [Macleaya cordata]	FHA domain-containing protein At4g14490 OS=Arabidopsis thaliana OX=3702 GN=At4g14490 PE=1 SV=1	FHA domain;Inner membrane component of T3SS, cytoplasmic domain	-	-	-	-	-	0.96	0.99	0.71	1.14	1.36	1.46	0.24	0.31	0.39	1.29	1.26	1.23
TR103_c5_g1	-	-	-	-	-	-	-	-	7.3	1.62	3.71	33.44	47.68	40.59	35.84	41.69	41.44	16.47	8.29	21.86
TR10303_c0_g1	-	-	-	-	-	-	-	-	7.27	4.99	7.02	2.16	3.35	2.16	23.03	22.19	25.24	13.79	20.07	14.19
TR103074_c0_g1	PREDICTED: T-cell receptor-associated transmembrane adapter 1 [Macaca fascicularis]|XP_011850856.1 PREDICTED: T-cell receptor-associated transmembrane adapter 1 isoform X1 [Mandrillus leucophaeus]|XP_011732423.1 T-cell receptor-associated transmembrane adapter 1 [Macaca nemestrina]|XP_014985281.1 PREDICTED: T-cell receptor-associated transmembrane adapter 1 [Macaca mulatta]	-	SHP2-interacting transmembrane adaptor protein, SIT	-	-	-	-	-	1.35	0.47	0.39	0.03	0.09	0	0.1	0.12	0.05	0.06	0.03	0
TR1031_c0_g1	PREDICTED: vacuolar amino acid transporter 1-like isoform X1 [Nelumbo nucifera]|XP_010241838.1 PREDICTED: vacuolar amino acid transporter 1-like isoform X1 [Nelumbo nucifera]	Amino acid transporter AVT1C OS=Arabidopsis thaliana OX=3702 GN=AVT1C PE=1 SV=1	Transmembrane amino acid transporter protein;Transmembrane amino acid transporter protein	-	-	-	K15015|SLC32A, VGAT; solute carrier family 32 (vesicular inhibitory amino acid transporter)	ko04721(Organismal Systems);ko04723(Organismal Systems);ko04727(Organismal Systems)	14.3	14.98	14.9	30.69	29.79	30.46	49.08	50.31	49.92	19.33	19.29	21.08
TR1031_c1_g1	PREDICTED: secoisolariciresinol dehydrogenase-like [Nelumbo nucifera]	Secoisolariciresinol dehydrogenase (Fragment) OS=Podophyllum peltatum OX=35933 PE=1 SV=1	Enoyl-(Acyl carrier protein) reductase;short chain dehydrogenase;KR domain;3-beta hydroxysteroid dehydrogenase/isomerase family	-	-	-	-	-	71.33	76.26	78.36	176.62	171.3	180.75	276.53	276.32	277.69	995.67	988.28	970.75
TR10315_c0_g1	hypothetical protein AQUCO_00500464v1 [Aquilegia coerulea]	G-type lectin S-receptor-like serine/threonine-protein kinase At5g35370 OS=Arabidopsis thaliana OX=3702 GN=At5g35370 PE=2 SV=2	-	-	-	-	-	-	8.67	10.96	8.16	9.93	9.47	11.22	15.66	11.94	12.01	1.75	1.64	2.76
TR10316_c2_g1	-	-	-	-	-	-	-	-	2.16	2.17	2.53	0	0.08	0	0	0.04	0.09	0	0	0.1
TR10324_c0_g1	Uncharacterized protein F082_1597 [bacterium F082]	-	-	-	-	-	-	-	2.71	4.1	4.81	0.61	0.28	1.15	5.68	0.77	4.09	1.07	0.93	0.72
TR103246_c0_g1	Ubc protein [Mus musculus]	Ubiquitin-NEDD8-like protein RUB1 OS=Deschampsia antarctica OX=159298 GN=RUB1 PE=2 SV=2	Ubiquitin family;Ubiquitin-2 like Rad60 SUMO-like;Ubiquitin-like domain;Ubiquitin-2 like Rad60 SUMO-like;DUF2407 ubiquitin-like domain;RNA methyltransferase;Protein of unknown function (DUF2870);Telomere stability and silencing	-	-	-	K08770|UBC; ubiquitin C	ko03320(Organismal Systems);ko04120(Genetic Information Processing);ko04137(Cellular Processes)	8.61	1.6	1.85	0.27	0.69	0.52	1.5	0.56	0.35	0.18	0.04	0.09
TR103246_c1_g1	Signal transduction histidine kinase [Macleaya cordata]	-	-	-	-	-	K14490|AHP; histidine-containing phosphotransfer peotein	ko04075(Environmental Information Processing)	0	0	0	0	0.12	0	2.19	2.58	2.6	0.15	0	0
TR1033_c0_g1	wall-associated receptor kinase carboxy-terminal protein [Medicago truncatula]	-	Wall-associated receptor kinase galacturonan-binding	-	-	-	-	-	7.44	8.02	7.03	11.59	11.96	11.3	0.9	0.87	1.47	0.48	0.34	0.64
TR103396_c0_g1	aegerolysin Aa-Pri1 [Pyrenophora seminiperda CCB06]	-	Aegerolysin	-	-	-	-	-	0	0	0	2.49	2.5	3.09	2.29	1.01	1.28	0	0.12	0
TR1034_c0_g1	hypothetical protein BVC80_8825g9 [Macleaya cordata]	-	-	-	-	-	-	-	51.11	48.92	55.13	70.09	72.54	69.16	65.24	67.62	71	25.53	27.18	24.78
TR1034_c1_g2	Reverse transcriptase zinc-binding domain [Macleaya cordata]	-	zinc-binding in reverse transcriptase	-	-	-	-	-	1.48	1.82	2.43	7.96	13.35	11.09	4.53	3.89	7.09	3.62	3.52	2.65
TR10343_c0_g1	Plant organelle RNA recognition domain [Macleaya cordata]	Protein WHAT&apos	Plant organelle RNA recognition domain	-	-	-	-	-	0.36	0.33	0.38	0.29	0.63	0.24	0.17	0.53	0.57	1.74	1.49	1.66
TR10345_c0_g1	hypothetical protein COLAER_02245 [Collinsella aerofaciens ATCC 25986]|EBA38844.1 hypothetical protein COLAER_01927 [Collinsella aerofaciens ATCC 25986]|EBA39062.1 hypothetical protein COLAER_01673 [Collinsella aerofaciens ATCC 25986]|EBA39188.1 hypothetical protein COLAER_01804 [Collinsella aerofaciens ATCC 25986]	Uncharacterized protein ORF91 OS=Phalaenopsis aphrodite subsp. formosana OX=308872 PE=4 SV=1	-	-	-	-	-	-	28.88	23.26	39.84	10.62	10.67	17.51	29.35	7.6	17.26	5.23	6.52	13.2
TR103461_c0_g1	-	-	-	-	-	-	-	-	0.06	0.16	0.18	0.14	0.13	0.27	0.75	0.67	0.59	0.42	0.55	0.7
TR10347_c0_g1	-	-	-	-	-	-	-	-	4.86	2.33	2.75	6.35	7.67	6.19	1.46	2.55	1.98	1.62	1.19	0.94
TR1035_c0_g2	SANT/Myb domain [Macleaya cordata]	Transcription factor MYB73 OS=Arabidopsis thaliana OX=3702 GN=MYB73 PE=1 SV=1	Myb-like DNA-binding domain;Myb-like DNA-binding domain	-	-	-	-	-	6.68	6.2	6.68	6.23	5.5	4.82	4.25	4.57	5.7	1.22	1.26	1.55
TR103502_c0_g1	-	-	-	-	-	-	-	-	1.14	0.32	0.44	0.03	0.07	0.11	0.36	0.12	0.11	0.13	0.13	0
TR10351_c0_g2	PREDICTED: serine/threonine-protein kinase PBS1 [Vitis vinifera]|CBI32103.3 unnamed protein product, partial [Vitis vinifera]	Probable serine/threonine-protein kinase PBL28 OS=Arabidopsis thaliana OX=3702 GN=PBL28 PE=2 SV=1	Protein kinase domain;Protein tyrosine kinase	-	-	-	K04733|IRAK4; interleukin-1 receptor-associated kinase 4 [EC:2.7.11.1]	ko04010(Environmental Information Processing);ko04064(Environmental Information Processing);ko04620(Organismal Systems);ko04621(Organismal Systems);ko04624(Organismal Systems);ko04722(Organismal Systems)	0.59	0.89	0.95	0.45	0.54	0.17	0.3	0.56	0.53	1.42	1.29	1.8
TR103510_c0_g2	Integrin alpha-6, partial [Bos mutus]	-	-	-	-	-	-	-	0.81	0.16	0.21	0	0.02	0	0.13	0.06	0	0.03	0	0
TR10353_c0_g1	hypothetical protein AQUCO_02700109v1 [Aquilegia coerulea]	-	IBR domain, a half RING-finger domain;Reverse transcriptase-like	-	-	-	-	-	2.96	3.61	2.76	1.29	0.76	1	0.43	1.02	0.61	0.77	0.76	0.92
TR1036_c0_g1	PREDICTED: dnaJ protein homolog [Theobroma cacao]|EOY19294.1 DNAJ [Theobroma cacao]	DnaJ protein homolog 1 (Fragment) OS=Allium porrum OX=4681 GN=DNAJ1 PE=2 SV=1	DnaJ C terminal domain;DnaJ central domain;DnaJ domain	-	-	-	K09503|DNAJA2; DnaJ homolog subfamily A member 2	ko04141(Genetic Information Processing)	65.43	64.85	64.41	75.71	75.25	73.91	40.62	37.49	38.59	31.64	34.47	31.08
TR10361_c0_g1	Bifunctional inhibitor/plant lipid transfer protein/seed storage helical domain [Macleaya cordata]	14 kDa proline-rich protein DC2.15 OS=Daucus carota OX=4039 PE=2 SV=1	Hydrophobic seed protein;Protease inhibitor/seed storage/LTP family;Probable lipid transfer	-	-	-	-	-	191.91	202.08	192.62	227.68	211.83	213.67	209.29	223.22	211.63	46.71	42.96	42.57
TR10362_c0_g1	-	-	-	-	-	-	-	-	7.34	6.84	6.55	7.39	7.52	6.93	5.44	5.51	6.32	2.57	2.5	2.24
TR10365_c0_g1	Bet v I domain [Macleaya cordata]	S-norcoclaurine synthase 2 OS=Papaver somniferum OX=3469 GN=NCS2 PE=1 SV=1	Pathogenesis-related protein Bet v I family	-	-	-	-	-	2.78	2.26	3.69	0.66	0.2	0.52	10.38	11.95	10.41	4.9	8.06	5.95
TR10370_c0_g1	-	-	-	-	-	-	-	-	148.83	148.72	172.85	61.19	65.45	57.87	106.11	121.21	142	59.21	63.78	63.44
TR1038_c1_g2	PREDICTED: probable protein phosphatase 2C 12 [Vitis vinifera]|XP_010664578.1 PREDICTED: probable protein phosphatase 2C 12 [Vitis vinifera]|XP_010664579.1 PREDICTED: probable protein phosphatase 2C 12 [Vitis vinifera]|XP_010664580.1 PREDICTED: probable protein phosphatase 2C 12 [Vitis vinifera]|CBI19533.3 unnamed protein product, partial [Vitis vinifera]	Probable protein phosphatase 2C 12 OS=Arabidopsis thaliana OX=3702 GN=At1g47380 PE=2 SV=1	Protein phosphatase 2C;Protein phosphatase 2C	-	-	-	-	-	9.17	9.63	10.74	8.49	8.07	9.08	6.7	5.73	5.36	1.22	1.46	1.8
TR1038_c14_g1	-	-	-	-	-	-	-	-	0.49	0.28	0.52	0.32	0.26	0.43	0.38	0.44	0.56	1.65	1.2	1.6
TR103914_c0_g1	diacylglycerol kinase zeta isoform 1 [Mus musculus]|EDL27585.1 diacylglycerol kinase zeta, isoform CRA_b [Mus musculus]	-	Ankyrin repeats (3 copies);Ankyrin repeats (many copies);Ankyrin repeat;Ankyrin repeats (many copies);Ankyrin repeat	signal transduction;cell communication;G protein-coupled receptor signaling pathway;biological_process;cellular process;signaling;regulation of biological process;regulation of cellular process;response to stimulus;cellular response to stimulus;biological regulation;cell cycle checkpoint;DNA damage checkpoint;G1/S transition of mitotic cell cycle;mitotic cell cycle;regulation of cell cycle;respon…	molecular_function;catalytic activity;kinase activity;transferase activity;transferase activity, transferring phosphorus-containing groups;phosphotransferase activity, alcohol group as acceptor;molecular function regulator;enzyme regulator activity;binding;ion binding;cation binding;nucleotide binding;drug binding;purine nucleotide binding;adenyl nucleotide binding;ribonucleotide binding;purine r…	intracellular;cellular_component;membrane;cell;nucleus;intracellular membrane-bounded organelle;cell leading edge;membrane-enclosed lumen;nuclear lumen;cell projection;organelle;membrane-bounded organelle;intracellular organelle;organelle lumen;organelle part;intracellular part;nuclear part;intracellular organelle part;cell part;intracellular organelle lumen;cell periphery;plasma membrane bounded…	-	-	1.36	0.48	0.32	0	0.13	0	0.46	0.18	0.14	0.34	0.11	0.11
TR10398_c0_g1	-	-	-	-	-	-	-	-	2.56	2.16	2.12	0.99	1.72	1.08	3.35	4.48	5.62	6.42	5.57	6.16
TR104_c0_g1	JmjC domain [Macleaya cordata]	Lysine-specific demethylase JMJ706 OS=Oryza sativa subsp. japonica OX=39947 GN=JMJ706 PE=2 SV=1	JmjC domain, hydroxylase;C5HC2 zinc finger;jmjN domain	-	-	-	-	-	37.83	39.28	39.41	34.36	33.76	34.67	40.44	39.52	42.35	6.6	6.38	7
TR10403_c0_g1	cell wall-associated hydrolase [uncultured bacterium]	-	-	-	-	-	-	-	2.83	4.76	22.5	1.54	0.39	0.68	7.59	2.41	2.71	0.84	0.77	0.28
TR104048_c0_g2	PREDICTED: neurobeachin-like protein 2 isoform X1 [Macaca fascicularis]	BEACH domain-containing protein B OS=Arabidopsis thaliana OX=3702 GN=BCHB PE=4 SV=1	WD domain, G-beta repeat	-	-	-	-	-	0.64	0.27	0.31	0	0	0.04	0.08	0.13	0.08	0	0	0
TR10406_c0_g1	GYF [Macleaya cordata]	-	-	-	-	-	-	-	0.64	0.52	0.93	8.53	12.61	8.14	1.61	0.76	2.15	6.08	6.05	6.47
TR1041_c0_g2	-	-	-	-	-	-	-	-	0.21	0	0.51	0	0	0	3.07	1.86	2.53	0.31	0.19	0
TR10411_c0_g1	-	-	-	-	-	-	-	-	45.51	52.93	52.05	144.27	128.25	138.97	74.41	79.37	101.45	25.74	25.9	18.54
TR10419_c0_g1	-	-	-	-	-	-	-	-	1.39	0.71	1.13	1.56	1.95	1.75	6.96	7.73	7.19	3.35	2.52	2.57
TR1042_c0_g1	ABSCISIC ACID-INSENSITIVE 5-like protein 1 isoform X2 [Papaver somniferum]	Protein ABSCISIC ACID-INSENSITIVE 5 OS=Arabidopsis thaliana OX=3702 GN=ABI5 PE=1 SV=1	bZIP transcription factor;Basic region leucine zipper	-	-	-	K14432|ABF; ABA responsive element binding factor	ko04075(Environmental Information Processing)	0.03	0.03	0	0.08	0.03	0.07	4.75	4.21	4.51	0.48	0.21	0.31
TR1042_c1_g1	PREDICTED: vacuolar protein sorting-associated protein 2 homolog 3 [Prunus mume]	Vacuolar protein sorting-associated protein 2 homolog 3 OS=Arabidopsis thaliana OX=3702 GN=VPS2.3 PE=2 SV=1	Snf7	-	-	-	K12192|CHMP2B; charged multivesicular body protein 2B	ko04144(Cellular Processes);ko04217(Cellular Processes)	15.68	18.63	16.17	13.36	11.63	12.99	14.26	15.02	14.89	28.8	28.02	26.83
TR1042_c8_g1	-	-	-	-	-	-	-	-	0	0	0	0.05	0	0.32	0.13	0.37	0.33	1.73	1.55	1.74
TR10420_c0_g1	TCR gamma alternate reading frame protein isoform X2 [Macaca nemestrina]	-	Immunoglobulin V-set domain;Immunoglobulin C1-set domain	-	-	-	-	-	4.81	1.19	1.17	0.14	0.7	0.63	0.48	0.52	0.25	0.1	0.14	0.15
TR10429_c0_g1	DREB2A-interacting protein 2 isoform 1 [Theobroma cacao]	E3 ubiquitin protein ligase DRIP2 OS=Arabidopsis thaliana OX=3702 GN=DRIP2 PE=1 SV=1	-	-	-	-	-	-	3.09	3.17	3.21	5.44	3.9	5.49	8.41	8.71	9.55	3.08	2.67	2.87
TR1043_c2_g1	-	-	-	-	-	-	-	-	0.25	0.16	0.16	0.52	0.55	0.56	0.86	0.68	0.57	2.72	2.32	2.62
TR1043_c3_g1	-	-	-	-	-	-	-	-	44.39	31.37	55.85	14.31	12.49	10.96	14.43	11.09	11.62	1.05	7.83	10.08
TR104356_c0_g1	PREDICTED: G-protein coupled receptor 183 [Macaca mulatta]	-	7 transmembrane receptor (rhodopsin family);Serpentine type 7TM GPCR chemoreceptor Srx	-	-	-	-	-	2.06	0.58	0.57	0.05	0.1	0.13	0.3	0.21	0.21	0.04	0.02	0.04
TR10436_c0_g1	PREDICTED: zinc finger protein ZAT1-like [Nelumbo nucifera]	Zinc finger protein ZAT9 OS=Arabidopsis thaliana OX=3702 GN=ZAT9 PE=2 SV=1	C2H2-type zinc finger;C2H2-type zinc finger;Zinc-finger double-stranded RNA-binding	-	-	-	-	-	0.82	1.12	1.62	1.07	0.46	0.8	0.99	1.28	0.98	4.77	6	4.86
TR104360_c0_g1	arf-GAP with GTPase, ANK repeat and PH domain-containing protein 2 isoform 1 [Mus musculus]|Q3UHD9.1 RecName: Full=Arf-GAP with GTPase, ANK repeat and PH domain-containing protein 2	ADP-ribosylation factor GTPase-activating protein AGD3 OS=Arabidopsis thaliana OX=3702 GN=AGD3 PE=1 SV=1	Putative GTPase activating protein for Arf;Ras family;PH domain	cytoskeleton organization;organelle organization;biological_process;cellular process;cellular component organization;actin filament-based process;cellular component organization or biogenesis;signal transduction;intracellular signal transduction;cell communication;signaling;regulation of biological process;regulation of cellular process;response to stimulus;cellular response to stimulus;biologica…	molecular_function;catalytic activity;nucleoside-triphosphatase activity;pyrophosphatase activity;hydrolase activity;hydrolase activity, acting on acid anhydrides;hydrolase activity, acting on acid anhydrides, in phosphorus-containing anhydrides;enzyme activator activity;molecular function regulator;enzyme regulator activity;GTPase regulator activity;nucleoside-triphosphatase regulator activity;b…	intracellular;cellular_component;extracellular region;extracellular space;cell;nucleus;cytoplasm;intracellular membrane-bounded organelle;endomembrane system;cytoplasmic vesicle;membrane-enclosed lumen;nuclear lumen;vesicle;organelle;membrane-bounded organelle;non-membrane-bounded organelle;intracellular organelle;extracellular organelle;intracellular non-membrane-bounded organelle;organelle lume…	-	-	1.66	0.62	0.57	0.11	0.21	0.15	0.22	0.15	0	0.12	0.09	0.05
TR1044_c0_g1	Vacuolar protein sorting-associated protein 62 [Macleaya cordata]	-	Vacuolar protein sorting-associated protein 62	-	-	-	-	-	38.64	38.57	41	81.56	79.47	82.42	137.89	135.84	133.84	128.25	127.52	121.79
TR10444_c0_g1	-	-	-	-	-	-	-	-	0.18	0.18	0.42	1.48	1.68	1.52	0	0.07	0	0	0.04	0
TR10449_c1_g1	PREDICTED: uncharacterized protein LOC109113865 isoform X1 [Nelumbo nucifera]	-	-	-	-	-	-	-	4.73	4.78	5.2	3.66	3.71	3.75	1.28	0.99	1.4	1.09	1.03	1.1
TR1045_c0_g1	PREDICTED: LOW QUALITY PROTEIN: uncharacterized protein LOC104590182 [Nelumbo nucifera]	Cysteine-rich receptor-like protein kinase 25 OS=Arabidopsis thaliana OX=3702 GN=CRK25 PE=3 SV=1	Protein tyrosine kinase;Protein kinase domain;Salt stress response/antifungal	-	-	-	-	-	4.21	4.27	5.01	5.61	5.84	6.65	12.77	13.44	13.22	3.86	4.13	4.44
TR1045_c0_g2	hypothetical protein AQUCO_03200009v1 [Aquilegia coerulea]	Cysteine-rich receptor-like protein kinase 8 OS=Arabidopsis thaliana OX=3702 GN=CRK8 PE=3 SV=2	Protein tyrosine kinase;Protein kinase domain;Salt stress response/antifungal;Domain of unknown function (DUF3403)	-	-	-	-	-	2.81	2.44	2.51	4.27	3.82	3.38	6.34	5.59	4.58	1.84	1.96	1.96
TR1045_c1_g1	PREDICTED: putative receptor-like protein kinase At4g00960 [Nelumbo nucifera]|XP_010247619.1 PREDICTED: putative receptor-like protein kinase At4g00960 [Nelumbo nucifera]	Cysteine-rich receptor-like protein kinase 11 OS=Arabidopsis thaliana OX=3702 GN=CRK11 PE=2 SV=2	Salt stress response/antifungal	-	-	-	-	-	7.45	8.82	8.9	13.08	12.44	12.65	10.39	9.46	9.07	4.44	3.08	2.43
TR1045_c3_g1	hypothetical protein CR513_43532 [Mucuna pruriens]	-	Domain of unknown function (DUF4228)	-	-	-	-	-	7.07	6.44	7.48	2.49	1.94	1.71	0.83	0.9	1.61	1.06	0.58	0.62
TR1045_c4_g1	hypothetical protein BVC80_1833g114 [Macleaya cordata]	-	-	-	-	-	-	-	0.06	0.12	0.17	0.57	0.42	0.86	0.6	0.99	0.84	1.03	1.63	1.5
TR10456_c1_g1	-	-	-	-	-	-	-	-	0.2	0.59	0.18	1.14	1.25	1.01	0.61	0.64	0.43	0.25	0.37	0.25
TR104567_c0_g1	Harbinger transposase-derived nuclease [Macleaya cordata]	Protein ANTAGONIST OF LIKE HETEROCHROMATIN PROTEIN 1 OS=Arabidopsis thaliana OX=3702 GN=ALP1 PE=1 SV=1	DDE superfamily endonuclease;Plant transposon protein	-	-	-	-	-	0.21	0.18	0.49	0.28	0.31	0.51	0.36	0.33	0.29	1.67	1.14	1.39
TR104597_c0_g1	cAMP-dependent protein kinase type I-beta regulatory subunit isoform a [Mus musculus]|NP_001240819.1 cAMP-dependent protein kinase type I-beta regulatory subunit isoform a [Mus musculus]|NP_001346027.1 cAMP-dependent protein kinase type I-beta regulatory subunit isoform a [Mus musculus]|NP_001346029.1 cAMP-dependent protein kinase type I-beta regulatory subunit isoform a [Mus musculus]|NP_0013460…	-	Cyclic nucleotide-binding domain;Regulatory subunit of type II PKA R-subunit	multicellular organism development;anatomical structure morphogenesis;biological_process;multicellular organismal process;developmental process;animal organ development;system development;anatomical structure development;system process;nervous system process;behavior;cognition;metabolic process;regulation of protein phosphorylation;negative regulation of protein phosphorylation;cellular protein m…	molecular_function;enzyme inhibitor activity;protein kinase inhibitor activity;protein kinase regulator activity;molecular function regulator;kinase regulator activity;kinase inhibitor activity;enzyme regulator activity;protein serine/threonine kinase inhibitor activity;nucleotide binding;binding;purine nucleotide binding;cyclic nucleotide binding;adenyl nucleotide binding;ribonucleotide binding;…	intracellular;cellular_component;membrane;cell;protein-containing complex;intracellular part;cell part;cell periphery;cytoplasm;cAMP-dependent protein kinase complex;plasma membrane	K04739|PRKAR; cAMP-dependent protein kinase regulator	ko04910(Organismal Systems)	1.46	0.46	0.31	0.05	0.09	0.05	0.33	0.07	0.05	0.09	0.06	0.03
TR10462_c0_g1	NADP-dependent glyceraldehyde-3-phosphate dehydrogenase [Abrus precatorius]	NADP-dependent glyceraldehyde-3-phosphate dehydrogenase OS=Nicotiana plumbaginifolia OX=4092 GN=GAPN PE=2 SV=1	Aldehyde dehydrogenase family;Family of unknown function (DUF5356)	-	-	-	K00131|gapN; glyceraldehyde-3-phosphate dehydrogenase (NADP+) [EC:1.2.1.9]	ko00010(Metabolism);ko00030(Metabolism);ko01100(Metabolism);ko01120(Metabolism);ko01200(Metabolism)	18.38	19.88	20.69	7.45	6.96	7.52	5.85	5.16	5.19	2.8	2.44	2.92
TR10462_c2_g1	V-type proton ATPase catalytic subunit A isoform X1 [Mus caroli]	V-type proton ATPase catalytic subunit A OS=Vigna radiata var. radiata OX=3916 PE=1 SV=3	ATP synthase alpha/beta family, nucleotide-binding domain;ATPsynthase alpha/beta subunit N-term extension;ATP synthase alpha/beta family, beta-barrel domain	transport;ion transport;cation transport;biological_process;monovalent inorganic cation transport;proton transmembrane transport;energy coupled proton transmembrane transport, against electrochemical gradient;ion transmembrane transport;localization;establishment of localization;transmembrane transport;ATP hydrolysis coupled transmembrane transport;cation transmembrane transport;inorganic ion tra…	molecular_function;ATPase activity, coupled;catalytic activity;cation-transporting ATPase activity;ATPase activity, coupled to transmembrane movement of substances;nucleoside-triphosphatase activity;transporter activity;transmembrane transporter activity;ATPase activity;cation transmembrane transporter activity;ion transmembrane transporter activity;monovalent inorganic cation transmembrane trans…	plasma membrane;proton-transporting two-sector ATPase complex;intracellular;cellular_component;lytic vacuole;membrane;lysosome;vacuole;extracellular region;extracellular space;cell;cytoplasm;vacuolar membrane;intracellular membrane-bounded organelle;organelle membrane;vesicle;protein-containing complex;proton-transporting V-type ATPase complex;proton-transporting two-sector ATPase complex, cataly…	K02145|ATPeV1A, ATP6A; V-type H+-transporting ATPase subunit A [EC:7.1.2.2]	ko00190(Metabolism);ko01100(Metabolism);ko04145(Cellular Processes);ko04150(Environmental Information Processing);ko04721(Organismal Systems);ko04966(Organismal Systems)	2.93	0.54	0.37	0.09	0.14	0.06	0.46	0.21	0.16	0.07	0.06	0.03
TR10468_c0_g1	mCG10725, isoform CRA_b, partial [Mus musculus]	40S ribosomal protein S25-3 OS=Arabidopsis thaliana OX=3702 GN=RPS25D PE=3 SV=2	S25 ribosomal protein	-	-	-	K02975|RP-S25e, RPS25; small subunit ribosomal protein S25e	ko03010(Genetic Information Processing)	15.7	3.7	4.53	1.64	0.79	2.49	3.86	2.92	1.86	0.82	0.68	1.65
TR104715_c0_g1	-	-	-	-	-	-	-	-	0.78	0.44	0.4	0.05	0.03	0	0.18	0.05	0.11	0.04	0	0
TR10475_c0_g1	-	-	-	-	-	-	-	-	0.83	0.83	0.35	0.87	1.63	0.74	5.28	6.91	6.9	7.08	5.76	6.68
TR1048_c0_g1	hypothetical protein AQUCO_01000115v1 [Aquilegia coerulea]	-	-	-	-	-	-	-	115.31	116.45	114.79	71.79	69.83	65.83	120.76	112.83	119.75	31.71	30.84	30.4
TR10480_c0_g1	-	-	-	-	-	-	-	-	24.91	25.38	27.49	6.92	6.49	7.23	12.58	13.52	14.79	2.74	2.93	3.98
TR10481_c0_g1	-	-	-	-	-	-	-	-	10.07	10.01	7.89	46.16	71.77	54.43	25.87	19.61	29.66	18.38	21.61	15.66
TR10483_c0_g1	tyrosine 3-monooxygenase/tryptophan 5-monooxygenase activation protein, theta polypeptide, partial [synthetic construct]|AAV38816.1 tyrosine 3-monooxygenase/tryptophan 5-monooxygenase activation protein, theta polypeptide, partial [synthetic construct]|AAX43252.1 tyrosine 3-monooxygenase/tryptophan 5-monooxygenase activation protein theta polypeptide, partial [synthetic construct]|AAX43253.1 tyro…	14-3-3-like protein OS=Helianthus annuus OX=4232 PE=2 SV=1	14-3-3 protein	metabolic process;biological_process;protein localization;transport;intracellular protein transport;protein transport;peptide transport;macromolecule localization;cellular protein localization;amide transport;establishment of protein localization;intracellular transport;localization;establishment of localization;cellular localization;establishment of localization in cell;cellular macromolecule lo…	molecular_function;catalytic activity;oxidoreductase activity;protein binding;binding;protein N-terminus binding;monooxygenase activity;protein domain specific binding	intracellular;cellular_component;extracellular region;extracellular space;cell;adherens junction;cell-substrate adherens junction;cell junction;cell-substrate junction;vesicle;organelle;membrane-bounded organelle;extracellular organelle;extracellular region part;intracellular part;cell part;anchoring junction;extracellular vesicle;extracellular exosome;focal adhesion;cytoplasm;membrane	K06630|YWHAE; 14-3-3 protein epsilon	ko04011(Environmental Information Processing);ko04110(Cellular Processes);ko04114(Cellular Processes);ko04151(Environmental Information Processing);ko04390(Environmental Information Processing);ko04391(Environmental Information Processing);ko04621(Organismal Systems);ko04722(Organismal Systems)	3.24	0.82	0.7	0.41	0.48	0.41	1.32	0.37	0.52	0.61	0.28	0.31
TR10488_c0_g1	Universal stress protein A [Macleaya cordata]	Universal stress protein A-like protein OS=Arabidopsis thaliana OX=3702 GN=At3g01520 PE=1 SV=2	Universal stress protein family	-	-	-	-	-	0.54	0.14	0.48	0.33	0.08	0.16	30.23	30.95	22.24	4.26	4.83	6.32
TR10493_c0_g1	-	-	-	-	-	-	-	-	0.82	0.82	0.56	0.69	0.87	0.93	1.58	1.48	2	0.16	0.48	0.42
TR10495_c0_g1	aconitate hydratase [Cricetulus griseus]	Aconitate hydratase 1 OS=Arabidopsis thaliana OX=3702 GN=ACO1 PE=1 SV=2	Aconitase family (aconitate hydratase);Aconitase C-terminal domain	metabolic process;organic acid metabolic process;generation of precursor metabolites and energy;citrate metabolic process;oxidation-reduction process;biological_process;aerobic respiration;cellular process;energy derivation by oxidation of organic compounds;antibiotic metabolic process;drug metabolic process;carboxylic acid metabolic process;oxoacid metabolic process;cellular metabolic process;pr…	molecular_function;catalytic activity;lyase activity;carbon-oxygen lyase activity;hydro-lyase activity;binding;metal ion binding;ion binding;cation binding;transition metal ion binding;cofactor binding;iron-sulfur cluster binding;metal cluster binding;iron ion binding;4 iron, 4 sulfur cluster binding;aconitate hydratase activity;3 iron, 4 sulfur cluster binding	intracellular;cellular_component;cell;cytoplasm;intracellular membrane-bounded organelle;organelle;membrane-bounded organelle;intracellular organelle;intracellular part;cytoplasmic part;cell part;myelin sheath;nucleus;mitochondrion	K01681|ACO, acnA; aconitate hydratase [EC:4.2.1.3]	ko00020(Metabolism);ko00630(Metabolism);ko00720(Metabolism);ko01100(Metabolism);ko01110(Metabolism);ko01120(Metabolism);ko01200(Metabolism);ko01210(Metabolism);ko01230(Metabolism)	2.63	0.77	0.83	0.1	0.29	0.29	0.73	0.54	0.4	0.08	0.14	0.08
TR104955_c0_g2	hypothetical protein AQUCO_00300637v1 [Aquilegia coerulea]	Heavy metal-associated isoprenylated plant protein 23 OS=Arabidopsis thaliana OX=3702 GN=HIPP23 PE=1 SV=1	Heavy-metal-associated domain	-	-	-	-	-	2.28	2.62	1.46	0.57	0.57	0.42	0.81	1.45	1.39	0.79	1.21	0.86
TR10496_c0_g1	hypothetical protein AQUCO_02400126v1 [Aquilegia coerulea]	G-type lectin S-receptor-like serine/threonine-protein kinase At5g24080 OS=Arabidopsis thaliana OX=3702 GN=At5g24080 PE=2 SV=1	Protein kinase domain;Protein tyrosine kinase	-	-	-	-	-	0.4	0.43	0.54	0.08	0.03	0.14	0.57	0.55	0.67	0.17	0.06	0.09
TR1050_c1_g2	PREDICTED: 9-cis-epoxycarotenoid dioxygenase NCED1, chloroplastic-like [Nelumbo nucifera]	9-cis-epoxycarotenoid dioxygenase NCED3, chloroplastic OS=Arabidopsis thaliana OX=3702 GN=NCED3 PE=2 SV=1	Retinal pigment epithelial membrane protein	-	-	-	K09840|NCED; 9-cis-epoxycarotenoid dioxygenase [EC:1.13.11.51]	ko00906(Metabolism);ko01100(Metabolism);ko01110(Metabolism)	0	0	0	0	0.02	0	4.07	5.82	0.05	0.07	0.06	0
TR10501_c0_g1	Hypoxia induced protein [Macleaya cordata]	-	Hypoxia induced protein conserved region	-	-	-	-	-	2.12	3.6	2.98	0.11	0	0.16	0.78	1.29	1.9	0.39	0.55	0.19
TR1051_c0_g2	ATP-dependent Clp protease adapter protein CLPS1, chloroplastic-like [Papaver somniferum]	ATP-dependent Clp protease adapter protein CLPS1, chloroplastic OS=Arabidopsis thaliana OX=3702 GN=CPLS1 PE=1 SV=1	ATP-dependent Clp protease adaptor protein ClpS	-	-	-	-	-	10.63	9.52	11.18	9.82	10.18	9.59	11.88	10.84	13.53	24.91	22.55	24.38
TR10518_c0_g1	-	-	-	-	-	-	-	-	64.76	67	92.25	0	0	1.59	3.1	7.72	6.92	9.94	14.62	9.56
TR10521_c0_g1	PREDICTED: DEAD-box ATP-dependent RNA helicase 3, chloroplastic isoform X1 [Nelumbo nucifera]	DEAD-box ATP-dependent RNA helicase 3, chloroplastic OS=Arabidopsis thaliana OX=3702 GN=RH3 PE=1 SV=2	DEAD/DEAH box helicase;Helicase conserved C-terminal domain;GUCT (NUC152) domain;Type III restriction enzyme, res subunit;Zinc knuckle;Prephenate dehydratase	-	-	-	-	-	54.79	58.59	59.78	53.36	52	55.28	51.92	54.95	50.4	23.32	22.57	22.35
TR10525_c0_g1	hypothetical protein DD596_25320 [Enterobacter cloacae complex sp. 4DZ3-28B]	-	-	-	-	-	-	-	17.84	16.47	7.14	2.23	5.51	6.46	15.62	1.73	3.67	2.08	0.76	1.39
TR105293_c0_g1	cytochrome P450, family 8, subfamily b, polypeptide 1 [Rattus norvegicus]	Cytochrome P450 88A1 OS=Zea mays OX=4577 GN=CYP88A1 PE=2 SV=1	Cytochrome P450	metabolic process;biological_process;oxidation-reduction process	molecular_function;binding;metal ion binding;ion binding;cation binding;transition metal ion binding;catalytic activity;monooxygenase activity;oxidoreductase activity;steroid hydroxylase activity;oxidoreductase activity, acting on paired donors, with incorporation or reduction of molecular oxygen;tetrapyrrole binding;cofactor binding;organic cyclic compound binding;heterocyclic compound binding;s…	intracellular;cellular_component;membrane;cell;cytoplasm;endoplasmic reticulum;intracellular membrane-bounded organelle;endomembrane system;organelle subcompartment;nuclear outer membrane-endoplasmic reticulum membrane network;organelle;membrane-bounded organelle;intracellular organelle;organelle part;intracellular part;membrane part;endoplasmic reticulum part;cytoplasmic part;intracellular organ…	-	-	1.33	0.27	0.31	0.11	0.03	0.03	0.28	0.15	0.03	0.04	0.02	0.04
TR1053_c0_g1	TB2/DP1/HVA22-related protein [Macleaya cordata]	HVA22-like protein a OS=Arabidopsis thaliana OX=3702 GN=HVA22A PE=2 SV=1	TB2/DP1, HVA22 family	-	-	-	-	-	79.66	83.27	81.33	38.7	36.61	38.49	42.05	43.59	43.76	21.18	20.57	21.18
TR10534_c0_g1	-	-	-	-	-	-	-	-	19.14	19.82	22.93	46.04	48.32	58.69	30.16	45.14	46.1	42.24	39.61	36.26
TR10537_c0_g1	Protein kinase domain [Macleaya cordata]	G-type lectin S-receptor-like serine/threonine-protein kinase LECRK3 OS=Oryza sativa subsp. japonica OX=39947 GN=LECRK3 PE=3 SV=2	D-mannose binding lectin	-	-	-	-	-	6.67	3.87	5.3	8.5	10.19	6.57	16.1	20.27	17.52	2.71	4.48	3.84
TR10543_c0_g1	Pentatricopeptide repeat [Macleaya cordata]	Pentatricopeptide repeat-containing protein At4g14190, chloroplastic OS=Arabidopsis thaliana OX=3702 GN=At4g14190 PE=2 SV=2	PPR repeat family;PPR repeat;Pentatricopeptide repeat domain;PPR repeat;Pentacotripeptide-repeat region of PRORP	-	-	-	-	-	1.19	1.48	1.34	2.62	2.58	2.39	1.93	1.66	2.21	2.27	2.58	1.72
TR105442_c0_g1	Putative uncharacterized protein [Mesorhizobium loti]|BAV48121.1 Putative uncharacterized protein [Mesorhizobium loti]	-	-	-	-	-	-	-	41.45	44.83	33.25	11.57	17.69	10.23	38.74	5.16	19.82	21.11	7.7	6.32
TR10549_c0_g1	Oleosin [Macleaya cordata]	Oleosin Bn-III OS=Brassica napus OX=3708 PE=2 SV=1	Oleosin	-	-	-	-	-	0.08	0.08	0.09	0.06	0	0.09	2.52	5.52	3.33	0.77	0.48	1.44
TR105521_c3_g1	natural killer cells antigen CD94 isoform X2 [Macaca nemestrina]|Q9MZK9.1 RecName: Full=Natural killer cells antigen CD94	-	Lectin C-type domain	immune effector process;immune system process;leukocyte mediated immunity;lymphocyte mediated immunity;defense response;response to stress;immune response;biological_process;innate immune response;response to stimulus;natural killer cell mediated immunity	molecular_function;binding;MHC protein complex binding;protein-containing complex binding;protein binding;signaling receptor binding;MHC class Ib protein complex binding;MHC class Ib protein binding;MHC protein binding;antigen binding;protein antigen binding;MHC class I protein complex binding;carbohydrate binding;MHC class Ib protein binding, via antigen binding groove	plasma membrane;cellular_component;membrane;cell;cell surface;intrinsic component of membrane;protein-containing complex;membrane part;plasma membrane part;cell part;cell periphery;side of membrane;receptor complex;external side of plasma membrane;integral component of membrane	-	-	1.32	0.31	0.51	0	0	0.1	0.1	0.22	0.16	0	0.06	0
TR10554_c0_g1	PREDICTED: cytochrome P450 71A1-like [Nelumbo nucifera]	Cytochrome P450 71A26 OS=Arabidopsis thaliana OX=3702 GN=CYP71A26 PE=3 SV=1	Cytochrome P450	-	-	-	-	-	70.52	64.71	82.85	82.24	85.43	84.16	89.87	95.01	95.84	200.4	213.31	184.31
TR105542_c0_g1	-	-	-	-	-	-	-	-	85.46	114.11	37.06	37.24	27.4	39.1	77.46	135	50.91	28.4	42.46	23.52
TR105570_c0_g1	G-type lectin S-receptor-like serine/threonine-protein kinase [Vitis vinifera]	G-type lectin S-receptor-like serine/threonine-protein kinase SD1-1 OS=Arabidopsis thaliana OX=3702 GN=SD11 PE=1 SV=1	-	-	-	-	-	-	0	0	0	1.67	3.81	3.32	0.96	0.93	0.71	1.18	1.51	1.47
TR1056_c4_g1	-	-	-	-	-	-	-	-	4.29	4.84	3.57	1.64	1.71	1.43	1.07	1.03	1.45	1.32	1.35	1.33
TR10560_c0_g1	uncharacterized protein LOC109760008 [Aegilops tauschii subsp. tauschii]	-	-	-	-	-	-	-	0.29	0	0	0	0	0	2.51	2.87	1.75	0.14	0.27	0
TR10569_c0_g1	hypothetical protein AQUCO_05400007v1 [Aquilegia coerulea]	-	-	-	-	-	-	-	16.85	18.61	19.07	7.28	6.06	11.17	24.43	22.3	28.04	85.66	88.97	84.4
TR105796_c0_g2	chloride intracellular channel protein 4 [Mus musculus]|XP_006975728.1 PREDICTED: chloride intracellular channel protein 4 [Peromyscus maniculatus bairdii]|XP_021055749.1 chloride intracellular channel protein 4 [Mus pahari]|XP_021015095.1 chloride intracellular channel protein 4 [Mus caroli]|XP_027255469.1 chloride intracellular channel protein 4 isoform X2 [Cricetulus griseus]|Q9QYB1.3 RecName:…	Probable glutathione S-transferase DHAR1, cytosolic OS=Oryza sativa subsp. japonica OX=39947 GN=DHAR1 PE=1 SV=1	Glutathione S-transferase, C-terminal domain	-	-	-	-	-	1.64	0.25	0.22	0.02	0.09	0.03	0.06	0.17	0	0.04	0.04	0.04
TR1058_c0_g2	Ubiquitin E2 variant [Macleaya cordata]	Protein ELC-like OS=Arabidopsis thaliana OX=3702 GN=ELCL PE=1 SV=1	UEV domain;Vps23 core domain	-	-	-	K12183|TSG101, STP22, VPS23; ESCRT-I complex subunit TSG101	ko04144(Cellular Processes)	14.7	14.26	14.33	23.32	22.99	23.13	21.81	22.95	23.49	7.02	6.79	7.28
TR1058_c3_g1	-	-	-	-	-	-	-	-	15.26	13.19	15.83	2.73	4.98	2.91	5.48	5.59	5.49	1.44	1.02	1.44
TR105838_c0_g1	transmembrane 4 L6 family member 1 [Bos taurus]|XP_005911525.1 PREDICTED: transmembrane 4 L6 family member 1 [Bos mutus]|XP_010856414.1 PREDICTED: transmembrane 4 L6 family member 1 [Bison bison bison]|XP_027399476.1 transmembrane 4 L6 family member 1 [Bos indicus x Bos taurus]|AAI19953.1 Transmembrane 4 L six family member 1 [Bos taurus]|ABM06151.1 transmembrane 4 superfamily member 1 [Bos tauru…	-	L6 membrane protein	-	-	-	-	-	1.81	0.18	0.42	0.12	0.04	0.08	0.04	0.08	0	0	0.02	0
TR105866_c0_g1	unnamed protein product [Macaca fascicularis]	-	-	-	-	-	-	-	1.5	0.25	0.3	0.01	0.09	0.09	0.17	0.07	0.06	0.05	0.02	0.09
TR10587_c0_g1	-	-	-	-	-	-	-	-	1.43	1.18	1.36	1.1	1.42	1.05	1.56	1.32	1.37	0.59	0.33	0.45
TR10587_c1_g1	-	-	-	-	-	-	-	-	2	2.06	1.68	1.72	1.55	1.71	4.81	3.78	5.57	1.34	1.25	1.11
TR10587_c2_g1	RNA recognition motif domain [Macleaya cordata]	Polyadenylate-binding protein 2 OS=Arabidopsis thaliana OX=3702 GN=PAB2 PE=1 SV=1	RNA recognition motif. (a.k.a. RRM, RBD, or RNP domain);RNA recognition motif. (a.k.a. RRM, RBD, or RNP domain)	-	-	-	-	-	0	0.08	0	1.01	0.86	1.07	0.81	0.56	0.55	0.11	0.11	0.11
TR10588_c0_g1	-	-	-	-	-	-	-	-	0.94	1.32	0.48	2.84	2.6	3.29	0.59	0.97	0.97	0.29	0.42	0.29
TR1059_c0_g1	hypothetical protein AQUCO_02000612v1 [Aquilegia coerulea]	Vacuolar cation/proton exchanger 2 OS=Oryza sativa subsp. japonica OX=39947 GN=CAX2 PE=2 SV=2	Sodium/calcium exchanger protein	-	-	-	-	-	31.55	29.8	30.99	52.57	51.88	50.32	188.73	195.83	200	297.58	310.27	319.35
TR1059_c1_g1	Galectin [Macleaya cordata]	Hydroxyproline O-galactosyltransferase GALT6 OS=Arabidopsis thaliana OX=3702 GN=GALT6 PE=2 SV=2	Leucine rich repeat;Leucine Rich repeats (2 copies);Leucine Rich Repeat;Leucine rich repeat N-terminal domain;Leucine Rich repeat;Galactoside-binding lectin;Galactosyltransferase	-	-	-	-	-	12.94	13.19	13.14	10.19	9.48	9.78	8.62	9.39	9.08	4.19	3.83	3.85
TR1059_c2_g2	hypothetical protein AQUCO_150400001v1, partial [Aquilegia coerulea]	-	Leucine rich repeat N-terminal domain	-	-	-	-	-	2.07	2.05	1.23	5.95	5.71	4.65	10.51	11.23	11.86	3.98	4.22	3.33
TR1059_c5_g1	AP2/ERF domain [Macleaya cordata]	Ethylene-responsive transcription factor 1A OS=Arabidopsis thaliana OX=3702 GN=ERF1A PE=1 SV=2	AP2 domain	-	-	-	-	-	41	41.99	47.01	16.58	15.28	16.4	17.35	16.5	14.52	13.17	11.04	13.22
TR10590_c0_g1	Bm13240 [Brugia malayi]	-	-	-	-	-	-	-	11.69	4.59	6.62	1.69	1.6	1.76	5.64	2.76	2.48	0.75	0.58	1.44
TR10590_c0_g2	-	-	-	-	-	-	-	-	36.15	14.08	12.32	1.72	3.67	2.53	19.52	2.87	5.42	2.09	0.92	0
TR10591_c0_g2	Chain A, Recombinant Rat Liver 3-Alpha-Hydroxysteroid Dehydrogenase (3-Alpha-Hsd) Complexed With Nadp And Testosterone|1AFS_B Chain B, Recombinant Rat Liver 3-Alpha-Hydroxysteroid Dehydrogenase (3-Alpha-Hsd) Complexed With Nadp And Testosterone	Non-functional NADPH-dependent codeinone reductase 2 OS=Papaver somniferum OX=3469 GN=COR2 PE=1 SV=1	Aldo/keto reductase family	metabolic process;biological_process;lipid metabolic process;primary metabolic process;organic substance metabolic process;organic cyclic compound metabolic process;multicellular organism development;nervous system development;central nervous system development;brain development;telencephalon development;pallium development;limbic system development;forebrain development;multicellular organismal …	molecular_function;catalytic activity;oxidoreductase activity;steroid dehydrogenase activity;oxidoreductase activity, acting on CH-OH group of donors;oxidoreductase activity, acting on the CH-OH group of donors, NAD or NADP as acceptor;steroid dehydrogenase activity, acting on the CH-OH group of donors, NAD or NADP as acceptor;androsterone dehydrogenase activity;androsterone dehydrogenase (B-spec…	intracellular;cellular_component;cell;intracellular part;cell part;cytoplasm	-	-	2.14	0.46	0.51	0.14	0.32	0.12	0.42	0.53	0.47	0.03	0.04	0.09
TR106_c1_g1	Amidase [Macleaya cordata]	Fatty acid amide hydrolase OS=Arabidopsis thaliana OX=3702 GN=FAAH PE=1 SV=1	Amidase;Amidase	-	-	-	-	-	3.95	3.96	4.01	2.85	2.92	2.97	4.8	4.63	5.5	9.22	9.27	10.09
TR1060_c0_g2	hypothetical protein AQUCO_00300442v1 [Aquilegia coerulea]	Alkaline/neutral invertase A, mitochondrial OS=Arabidopsis thaliana OX=3702 GN=INVA PE=1 SV=1	Alkaline and neutral invertase;Alkaline and neutral invertase;Alkaline and neutral invertase	-	-	-	-	-	91.9	96.34	96.8	61.71	59.86	62.23	158.46	160.87	158.65	142.43	142.67	140.55
TR106041_c0_g1	agglutinin-like isoform X2 [Quercus suber]	Agglutinin OS=Castanea crenata OX=103480 PE=1 SV=1	Jacalin-like lectin domain	-	-	-	-	-	1.21	1.09	1.31	0.07	0.1	0.05	0.65	0.77	0.93	0.06	0.09	0
TR10606_c2_g1	PREDICTED: E3 ubiquitin-protein ligase RHA2A-like [Nelumbo nucifera]	Probable E3 ubiquitin-protein ligase XERICO OS=Arabidopsis thaliana OX=3702 GN=XERICO PE=1 SV=1	Ring finger domain;RING-like zinc finger;Zinc finger, C3HC4 type (RING finger)	-	-	-	-	-	16.43	15.2	17.44	0.69	1.94	1.65	1.85	2.8	2.8	0.22	0.26	0.33
TR10609_c0_g1	PREDICTED: GDSL esterase/lipase At5g55050-like [Nelumbo nucifera]	GDSL esterase/lipase At5g55050 OS=Arabidopsis thaliana OX=3702 GN=At5g55050 PE=2 SV=1	GDSL-like Lipase/Acylhydrolase	-	-	-	-	-	51.56	52.16	49.8	39.32	40.87	39.13	13.69	14.35	13.84	15.39	16.26	15.99
TR10612_c0_g1	putative thiol-disulfide oxidoreductase DCC [Macleaya cordata]	Uncharacterized protein At5g50100, chloroplastic OS=Arabidopsis thaliana OX=3702 GN=At5g50100 PE=1 SV=1	-	-	-	-	-	-	2.13	2.92	2.41	1.61	1.38	1.6	1.29	1.27	1.35	2.28	2.46	2.29
TR10617_c1_g1	Endonuclease [Actinidia chinensis var. chinensis]	Protein BONZAI 2 OS=Arabidopsis thaliana OX=3702 GN=BON2 PE=1 SV=2	-	-	-	-	-	-	1.13	1.92	1.5	2.6	1.78	1.88	2.8	2.33	3.82	0.44	0.32	0.29
TR106182_c0_g1	PREDICTED: complement C5 isoform X1 [Rattus norvegicus]	-	A-macroglobulin complement component;UNC-6/NTR/C345C module;A-macroglobulin receptor	-	-	-	-	-	0.93	0.37	0.22	0.08	0.05	0.05	0.16	0.24	0.06	0	0.02	0
TR106209_c1_g1	-	-	-	-	-	-	-	-	35.63	39.16	35.95	57.98	43.33	39.29	164.71	174.69	183.44	355.65	363.63	386.71
TR106215_c0_g2	rho GTPase-activating protein 15 [Macaca mulatta]|XP_005573130.1 PREDICTED: rho GTPase-activating protein 15 isoform X1 [Macaca fascicularis]|XP_005573131.1 PREDICTED: rho GTPase-activating protein 15 isoform X1 [Macaca fascicularis]|XP_011844097.1 PREDICTED: rho GTPase-activating protein 15 [Mandrillus leucophaeus]|XP_011893652.1 PREDICTED: rho GTPase-activating protein 15 isoform X1 [Cercocebus…	-	RhoGAP domain;PH domain	-	-	-	-	-	1.25	0.32	0.45	0	0.07	0.04	0.33	0.14	0.08	0	0.02	0.05
TR10625_c0_g1	hypothetical protein AQUCO_01300542v1 [Aquilegia coerulea]	Subtilisin-like protease SBT3.6 OS=Arabidopsis thaliana OX=3702 GN=SBT3.6 PE=2 SV=1	Subtilase family;Peptidase inhibitor I9;Subtilase family	-	-	-	-	-	1.38	1.73	1.34	0.52	0.53	0.57	1.07	1.22	1.16	0.51	0.57	0.51
TR10628_c0_g1	PREDICTED: uncharacterized protein LOC104596010 isoform X2 [Nelumbo nucifera]	-	Protein of unknown function (DUF3522)	-	-	-	-	-	2.49	3.08	2.48	4.88	4.99	5.24	8.15	9.33	8.95	11.89	10.9	11.7
TR1063_c4_g1	protein of unknown function CP12 [Macleaya cordata]	Glyceraldehyde-3-phosphate dehydrogenase B, chloroplastic OS=Pisum sativum OX=3888 GN=GAPB PE=1 SV=2	Glyceraldehyde 3-phosphate dehydrogenase, C-terminal domain;Glyceraldehyde 3-phosphate dehydrogenase, NAD binding domain	-	-	-	K05298|GAPA; glyceraldehyde-3-phosphate dehydrogenase (NADP+) (phosphorylating) [EC:1.2.1.13]	ko00710(Metabolism);ko01100(Metabolism);ko01120(Metabolism);ko01200(Metabolism)	6.88	8.96	7.97	2.38	2.92	2.37	1.51	1.64	1.49	1.09	0.73	0.67
TR10637_c0_g1	putative xyloglucan endotransglucosylase/hydrolase protein 7 [Cinnamomum micranthum f. kanehirae]	Probable xyloglucan endotransglucosylase/hydrolase protein 7 OS=Arabidopsis thaliana OX=3702 GN=XTH7 PE=2 SV=2	Glycosyl hydrolases family 16;Xyloglucan endo-transglycosylase (XET) C-terminus	-	-	-	-	-	0.78	0.88	1.58	1.5	1.73	1.94	1.74	1.73	1.68	0.07	0.03	0.14
TR10637_c0_g2	probable xyloglucan endotransglucosylase/hydrolase protein 6 [Abrus precatorius]	Probable xyloglucan endotransglucosylase/hydrolase protein 6 OS=Arabidopsis thaliana OX=3702 GN=XTH6 PE=2 SV=2	Glycosyl hydrolases family 16;Xyloglucan endo-transglycosylase (XET) C-terminus	-	-	-	-	-	0.18	0.23	0.37	2.58	2.31	3.1	0.74	0.92	0.94	2.87	1.63	1.58
TR1064_c0_g1	transcription factor HY5-like [Quercus suber]	Transcription factor HY5-like OS=Arabidopsis thaliana OX=3702 GN=HYH PE=1 SV=1	-	-	-	-	K16241|HY5; transcription factor HY5	ko04712(Organismal Systems)	3.4	3.54	4.39	1.03	1.37	1.79	1.42	1.93	1.17	2.58	2.11	2
TR10642_c0_g1	hypothetical protein CK203_056369 [Vitis vinifera]	-	zinc-binding in reverse transcriptase	-	-	-	-	-	9.27	7.05	8.68	1.15	1.11	0.94	2.88	3.48	5.16	1.16	0.97	1.16
TR1065_c2_g1	-	-	-	-	-	-	-	-	2.71	1.45	2.8	2.41	2.91	1.71	9.31	9.14	10.82	21.9	24.91	19.48
TR10651_c0_g1	Protein of unknown function DUF1997 protein [Actinidia chinensis var. chinensis]	-	Protein of unknown function (DUF1997)	-	-	-	-	-	6.55	6.23	6.62	2.6	2.71	2.45	1.61	1.33	1.04	0.33	0.24	0.33
TR10663_c0_g1	heat shock protein HSP 90-alpha [Rattus norvegicus]|XP_008763191.1 PREDICTED: heat shock protein HSP 90-alpha [Rattus norvegicus]|P82995.3 RecName: Full=Heat shock protein HSP 90-alpha	-	-	response to stress;biological_process;response to temperature stimulus;response to abiotic stimulus;response to stimulus;response to chemical;regulation of neurotransmitter levels;neurotransmitter biosynthetic process;metabolic process;reactive oxygen species metabolic process;nitrogen compound metabolic process;nitric oxide biosynthetic process;biosynthetic process;regulation of biosynthetic pro…	molecular_function;catalytic activity;nucleoside-triphosphatase activity;pyrophosphatase activity;hydrolase activity;hydrolase activity, acting on acid anhydrides;hydrolase activity, acting on acid anhydrides, in phosphorus-containing anhydrides;molecular function regulator;enzyme regulator activity;protein binding;binding;protein domain specific binding;nitric-oxide synthase regulator activity;A…	intracellular;cellular_component;lytic vacuole;membrane;lysosome;vacuole;cell;cytoplasm;vacuolar membrane;intracellular membrane-bounded organelle;organelle membrane;cytoplasmic vesicle;vesicle;organelle;membrane-bounded organelle;intracellular organelle;organelle part;intracellular part;vacuolar part;cytoplasmic part;intracellular organelle part;cell part;pigment granule;intracellular vesicle;bo…	-	-	3.18	0.7	1.4	0.16	0	0	0.23	0.56	0.36	0	0.07	0.14
TR10666_c0_g1	Krueppel-like factor 6 [Pan paniscus]	-	Zinc finger, C2H2 type;Zinc-finger double domain;C2H2-type zinc finger	-	-	-	-	-	2.52	0.47	0.41	0.13	0.13	0.13	0.89	0.35	0.14	0.33	0.11	0.17
TR10667_c0_g1	zinc finger protein [Macleaya cordata]	GATA transcription factor 15 OS=Arabidopsis thaliana OX=3702 GN=GATA15 PE=2 SV=2	-	-	-	-	-	-	0.19	0.37	0.33	0.46	0.1	0.21	2.16	1.83	2.43	0.53	0.13	0.27
TR10667_c2_g1	-	-	-	-	-	-	-	-	0.21	0.11	0.13	1.05	0.96	0.62	0	0.61	0.38	3.08	2.79	2.47
TR1067_c2_g1	Cytochrome b561 [Macleaya cordata]	Cytochrome b561 and DOMON domain-containing protein At3g07570 OS=Arabidopsis thaliana OX=3702 GN=At3g07570 PE=2 SV=1	DOMON domain;Eukaryotic cytochrome b561	-	-	-	-	-	7.09	6.14	7.01	16.24	15.21	17.27	15.93	18.03	15.28	18.07	16.35	16.24
TR1067_c3_g1	-	-	-	-	-	-	-	-	10.95	8.69	8.82	28.79	28.32	28.35	54.09	55.33	58.45	38.05	39.04	39.31
TR1067_c5_g1	PREDICTED: LOW QUALITY PROTEIN: uncharacterized protein LOC104590182 [Nelumbo nucifera]	Cysteine-rich receptor-like protein kinase 8 OS=Arabidopsis thaliana OX=3702 GN=CRK8 PE=3 SV=2	-	-	-	-	-	-	1.19	0.34	0.61	4.7	4.01	5.22	4.06	2.45	4.05	1	1.29	0.75
TR10670_c0_g1	alpha-tubulin, partial [Trifolium repens]	Tubulin alpha chain OS=Prunus dulcis OX=3755 GN=TUBA PE=2 SV=1	Tubulin/FtsZ family, GTPase domain;Tubulin C-terminal domain	-	-	-	K07374|TUBA; tubulin alpha	ko04145(Cellular Processes);ko04210(Cellular Processes);ko04530(Cellular Processes);ko04540(Cellular Processes)	351.1	364.81	370.92	394.87	365.78	393.66	415.31	464.69	388.83	177.93	170.04	176.58
TR10670_c1_g1	tubulin alpha-4A chain isoform 1 [Mus musculus]|NP_005991.1 tubulin alpha-4A chain isoform 1 [Homo sapiens]|NP_001007005.1 tubulin alpha-4A chain [Rattus norvegicus]|NP_001071626.1 tubulin alpha-4A chain [Bos taurus]|NP_001156527.1 tubulin alpha-4A chain [Ovis aries]|XP_536077.2 tubulin alpha-4A chain isoform X1 [Canis lupus familiaris]|XP_001101117.1 PREDICTED: tubulin alpha-4A chain isoform X3 …	Tubulin alpha-2 chain OS=Gossypium hirsutum OX=3635 PE=2 SV=1	Tubulin/FtsZ family, GTPase domain;Tubulin C-terminal domain	biological_process;cellular process;mitotic cell cycle;cell cycle;mitotic cell cycle phase transition;cell cycle process;cell cycle phase transition;cell cycle G2/M phase transition;mitotic cell cycle process;vesicle-mediated transport;secretion;transport;exocytosis;secretion by cell;regulated exocytosis;localization;establishment of localization;G2/M transition of mitotic cell cycle;microtubule-…	molecular_function;catalytic activity;nucleoside-triphosphatase activity;pyrophosphatase activity;hydrolase activity;hydrolase activity, acting on acid anhydrides;hydrolase activity, acting on acid anhydrides, in phosphorus-containing anhydrides;structural molecule activity;nucleotide binding;nucleoside binding;purine nucleoside binding;binding;purine nucleotide binding;guanyl nucleotide binding;…	intracellular;cellular_component;extracellular region;extracellular space;cell;cytoplasm;cytoskeleton;microtubule cytoskeleton;vesicle;organelle;membrane-bounded organelle;non-membrane-bounded organelle;intracellular organelle;extracellular organelle;intracellular non-membrane-bounded organelle;extracellular region part;organelle part;intracellular part;cytoskeletal part;cytoplasmic part;intracel…	K07374|TUBA; tubulin alpha	ko04145(Cellular Processes);ko04210(Cellular Processes);ko04530(Cellular Processes);ko04540(Cellular Processes)	3.15	0.6	1.52	0.1	0.13	0.14	0.89	0.27	0.21	0.17	0.16	0.34
TR10673_c0_g1	PREDICTED: uncharacterized protein LOC104589201 [Nelumbo nucifera]	-	-	-	-	-	-	-	4.24	4.49	5.59	3.28	4.56	4.97	1.43	2.42	1.47	1.43	2	1.55
TR10675_c0_g1	PREDICTED: E3 ubiquitin-protein ligase AMFR [Orcinus orca]	-	Nuclear factor hnRNPA1	-	-	-	-	-	2.04	0.46	0.45	0.33	0.1	0.1	0.32	0.28	0.16	0.18	0.07	0.22
TR10676_c0_g1	translation elongation factor 1 alpha 1-like 14 [Homo sapiens]	Elongation factor 1-alpha OS=Vicia faba OX=3906 PE=2 SV=1	Elongation factor Tu GTP binding domain	-	-	-	-	-	22.49	4.84	6.66	1.3	0.25	1.34	2.96	2.13	1.6	0	0.31	0
TR106778_c0_g1	PREDICTED: uncharacterized protein LOC104601764 isoform X1 [Nelumbo nucifera]	-	Lipase (class 3)	-	-	-	-	-	0	0	0	0.03	0	0	0.05	0	0.05	0.56	0.57	0.51
TR1068_c1_g1	Protein kinase domain [Macleaya cordata]	Probable serine/threonine protein kinase IRE OS=Arabidopsis thaliana OX=3702 GN=IRE PE=2 SV=1	Protein kinase domain;Protein tyrosine kinase	-	-	-	-	-	4.53	4.71	4.56	1.59	1.69	1.48	0.89	0.72	0.7	0.12	0.08	0.16
TR10683_c0_g1	PREDICTED: GATA transcription factor 28-like isoform X1 [Nelumbo nucifera]	GATA transcription factor 28 OS=Arabidopsis thaliana OX=3702 GN=GATA28 PE=1 SV=1	CCT motif;GATA zinc finger;tify domain	-	-	-	-	-	0.08	0.14	0.35	0.12	0.15	0.28	1.31	1.4	1.83	0.26	0.27	0.43
TR10686_c0_g1	-	-	-	-	-	-	-	-	1.67	1.41	1.21	1.77	1.73	2.1	3.05	3.62	3.33	0.54	0.49	0.61
TR10686_c1_g1	-	-	-	-	-	-	-	-	0.32	0.59	0.44	1.09	0.85	1.21	1.34	1.07	1.16	0.4	0.16	0.17
TR10688_c0_g1	ThiJ/PfpI [Macleaya cordata]	DJ-1 protein homolog E OS=Arabidopsis thaliana OX=3702 GN=DJ1E PE=1 SV=1	DJ-1/PfpI family;ThiJ/PfpI family-like;SNO glutamine amidotransferase family	-	-	-	K18881|DJ1D; D-lactate dehydratase [EC:4.2.1.130]	ko00620(Metabolism);ko01100(Metabolism);ko01120(Metabolism)	5.09	4.86	4.66	0.84	0.91	0.73	1.51	1.16	1.53	2.01	1.74	1.42
TR10691_c0_g1	Ribonuclease H domain [Macleaya cordata]	-	-	-	-	-	-	-	1.77	1.17	2	1.61	2.16	1.67	0.84	0.67	0.57	1.04	1.5	0.68
TR10693_c0_g1	lignin-forming anionic peroxidase [Cinnamomum micranthum f. kanehirae]	Lignin-forming anionic peroxidase OS=Nicotiana sylvestris OX=4096 PE=2 SV=1	Peroxidase;Peroxidase;Peroxidase	-	-	-	K00430|E1.11.1.7; peroxidase [EC:1.11.1.7]	ko00940(Metabolism);ko01100(Metabolism);ko01110(Metabolism)	3.48	3.68	3.52	1.54	1.37	1.9	2.19	2.75	2.24	0.43	0.31	0.29
TR1070_c0_g1	potassium transporter [Macleaya cordata]	Potassium transporter 5 OS=Oryza sativa subsp. japonica OX=39947 GN=HAK5 PE=2 SV=2	K+ potassium transporter	-	-	-	-	-	2.73	2.74	2.74	5.81	5.1	6.29	6.72	7.35	7.13	4.47	4.86	4.86
TR10700_c0_g3	Cytochrome P450 [Theobroma cacao]	Cytochrome P450 714C2 OS=Oryza sativa subsp. japonica OX=39947 GN=CYP714C2 PE=2 SV=1	Cytochrome P450	-	-	-	-	-	5.71	5.97	6.93	0.46	0.39	0.44	0.88	0.92	1.13	0.58	0.36	0.5
TR10700_c1_g1	Cytochrome P450 [Macleaya cordata]	Cytochrome P450 714C2 OS=Oryza sativa subsp. japonica OX=39947 GN=CYP714C2 PE=2 SV=1	Cytochrome P450	-	-	-	-	-	0	0.03	0.03	0.05	0	0.07	2.06	2.52	2.26	2.17	2.75	1.93
TR10709_c0_g1	hypothetical protein AQUCO_01300405v1 [Aquilegia coerulea]	Stamen-specific protein FIL1 OS=Antirrhinum majus OX=4151 GN=FIL1 PE=2 SV=1	-	-	-	-	-	-	3.26	2.58	2.6	0.74	0.7	0.52	0.73	0.86	0.55	0.73	0.55	0.98
TR10711_c0_g1	expansin, partial [Carica papaya]	Expansin-A8 OS=Arabidopsis thaliana OX=3702 GN=EXPA8 PE=2 SV=1	-	-	-	-	-	-	4.26	4.18	5.57	3.84	3.55	1.47	2.35	2.33	6.12	16.84	20.85	20.2
TR107215_c0_g1	N-chimaerin isoform 1 [Mus musculus]|AAK56097.1 n-chimaerin [Mus musculus]|AAK56098.1 n-chimaerin [Mus musculus]|AAH10825.1 chimerin (chimaerin) 1 [synthetic construct]|AAH25023.1 Chimerin (chimaerin) 1 [Mus musculus]|AAH24796.1 Chimerin (chimaerin) 1 [Mus musculus]|BAC35853.1 unnamed protein product [Mus musculus]	-	RhoGAP domain;Phorbol esters/diacylglycerol binding domain (C1 domain)	cell morphogenesis;cell morphogenesis involved in differentiation;movement of cell or subcellular component;chemotaxis;multicellular organism development;anatomical structure morphogenesis;nervous system development;axonogenesis;axon guidance;biological_process;response to external stimulus;cellular process;cellular component organization;neurogenesis;cell projection organization;cell differentia…	molecular_function;enzyme activator activity;molecular function regulator;enzyme regulator activity;GTPase regulator activity;nucleoside-triphosphatase regulator activity;protein binding;signaling receptor binding;binding;ion binding;cation binding;ephrin receptor binding;metal ion binding;GTPase activator activity	intracellular;cellular_component;cell;intracellular part;cell part;cytoplasm	-	-	1.69	0.7	0.62	0.22	0.32	0.19	0.69	0.31	0.12	0.31	0.05	0.17
TR10724_c0_g1	PREDICTED: cysteine-rich receptor-like protein kinase 25 [Prunus mume]	Cysteine-rich receptor-like protein kinase 8 OS=Arabidopsis thaliana OX=3702 GN=CRK8 PE=3 SV=2	Protein tyrosine kinase	-	-	-	-	-	5.29	6.19	4.44	9.43	7.96	10.38	9.99	8.67	8.85	2.28	3.04	3.22
TR10727_c0_g1	hypothetical protein BVC80_1289g7 [Macleaya cordata]	Photosystem I subunit O OS=Arabidopsis thaliana OX=3702 GN=PSAO PE=1 SV=1	-	-	-	-	K14332|psaO; photosystem I subunit PsaO	ko00195(Metabolism)	25.83	30.84	25.73	14.48	14.58	13.64	5.76	5.69	6.01	2.15	2.77	2.69
TR10729_c0_g1	ABC transporter-like [Macleaya cordata]	ABC transporter G family member 21 OS=Arabidopsis thaliana OX=3702 GN=ABCG21 PE=2 SV=2	ABC transporter;AAA domain, putative AbiEii toxin, Type IV TA system;ABC-2 type transporter	-	-	-	-	-	2.93	2.42	2.22	1.32	0.75	1.36	3.69	3.32	3.53	1.9	1.96	2.21
TR1073_c0_g1	Pectate lyase/Amb allergen [Macleaya cordata]	Probable pectate lyase 5 OS=Arabidopsis thaliana OX=3702 GN=At1g67750 PE=2 SV=2	Pectate lyase	-	-	-	K01728|pel; pectate lyase [EC:4.2.2.2]	ko00040(Metabolism);ko01100(Metabolism);ko02024(Cellular Processes)	57.23	59.93	55.73	193.13	199.96	196.84	631.98	628.95	613.34	901.01	892.28	908.98
TR10736_c0_g1	L [Mammalian rubulavirus 5]	-	Mononegavirales RNA dependent RNA polymerase;Mononegavirales mRNA-capping region V;mRNA (guanine-7-)methyltransferase (G-7-MTase);Haemagglutinin-neuraminidase;Fusion glycoprotein F0;Paramyxovirus nucleocapsid protein;Viral matrix protein;N-terminal region of Paramyxovirinae phosphoprotein (P);Zinc-binding domain of Paramyxoviridae V protein;Paramyxovirus P/V phosphoprotein C-terminal	-	-	-	-	-	21.28	2.61	4.14	0.45	0.88	0.39	1.7	0.98	0.77	0.22	0.11	0.23
TR10737_c0_g1	AP-2 complex subunit mu isoform 1 [Mus musculus]|NP_004059.2 AP-2 complex subunit mu isoform a [Homo sapiens]|NP_446289.1 AP-2 complex subunit mu [Rattus norvegicus]|NP_001029695.1 AP-2 complex subunit mu [Bos taurus]|NP_001274033.1 AP-2 complex subunit mu [Canis lupus familiaris]|NP_001274653.1 AP-2 complex subunit mu [Macaca fascicularis]|XP_002716532.1 PREDICTED: AP-2 complex subunit mu isofor…	AP-2 complex subunit mu OS=Arabidopsis thaliana OX=3702 GN=AP2M PE=1 SV=1	Adaptor complexes medium subunit family;Clathrin adaptor complex small chain	-	-	-	K11826|AP2M1; AP-2 complex subunit mu-1	ko04144(Cellular Processes);ko04721(Organismal Systems);ko04961(Organismal Systems)	5.35	1.4	1.32	0.64	0.69	0.73	1.71	0.6	0.51	0.42	0.25	0.46
TR1074_c4_g1	-	-	-	-	-	-	-	-	0.31	0.23	0.35	0.99	0.96	0.86	0.73	0.62	0.3	0.14	0.14	0.18
TR10743_c0_g1	TSC22 domain family protein 1 isoform 2 [Mus musculus]|NP_037175.1 TSC22 domain family protein 1 isoform 2 [Rattus norvegicus]|XP_003500349.1 TSC22 domain family protein 1 isoform X1 [Cricetulus griseus]|XP_005355693.1 TSC22 domain family protein 1 isoform X3 [Microtus ochrogaster]|XP_006983897.1 PREDICTED: TSC22 domain family protein 1 isoform X1 [Peromyscus maniculatus bairdii]|XP_021059825.1 T…	-	TSC-22/dip/bun family	metabolic process;nucleobase-containing compound metabolic process;transcription, DNA-templated;cellular aromatic compound metabolic process;nitrogen compound metabolic process;biological_process;biosynthetic process;macromolecule biosynthetic process;regulation of biosynthetic process;cellular process;gene expression;regulation of gene expression;regulation of macromolecule biosynthetic process;…	transcription regulator activity;molecular_function;DNA-binding transcription factor activity	intracellular;cellular_component;cell;intracellular membrane-bounded organelle;organelle;membrane-bounded organelle;intracellular organelle;intracellular part;cell part;cytoplasm;nucleus	-	-	1.49	0.34	0.28	0.1	0.1	0.07	0.28	0.24	0.18	0.04	0.04	0.09
TR10749_c0_g1	PREDICTED: peptide chain release factor PrfB3, chloroplastic [Nelumbo nucifera]	Peptide chain release factor PrfB3, chloroplastic OS=Arabidopsis thaliana OX=3702 GN=PRFB3 PE=2 SV=1	PCRF domain;RF-1 domain	-	-	-	-	-	4	3.8	5.08	1.14	1.28	1.47	1.28	1.17	1.15	1.41	1.24	1.27
TR1075_c0_g2	PREDICTED: shugoshin-1-like isoform X1 [Nelumbo nucifera]	SHUGOSHIN 2 OS=Arabidopsis thaliana OX=3702 GN=SGO2 PE=2 SV=1	Shugoshin C terminus	-	-	-	-	-	3.43	4.16	3.77	1.34	1.77	1.15	1.66	1.46	2.24	2.24	1.55	2.31
TR10753_c1_g3	2Fe-2S ferredoxin-type domain [Macleaya cordata]	Ferredoxin-1, chloroplastic OS=Solanum lycopersicum OX=4081 GN=SEND33 PE=2 SV=1	2Fe-2S iron-sulfur cluster binding domain	-	-	-	K02639|petF; ferredoxin	ko00195(Metabolism)	204.9	214.52	204.23	83.35	82.18	85.45	44.47	43.63	39.26	9.94	8.07	9.87
TR107576_c0_g1	Glycoside hydrolase [Macleaya cordata]	Furostanol glycoside 26-O-beta-glucosidase OS=Cheilocostus speciosus OX=49577 GN=F26G PE=1 SV=1	Glycosyl hydrolase family 1	-	-	-	-	-	16.11	16.48	18.3	90.49	89.55	93.51	227.5	223.18	225.31	159.12	159.87	163.73
TR10767_c0_g1	PREDICTED: uncharacterized protein LOC107828711 [Nicotiana tabacum]	-	-	-	-	-	-	-	4.1	4.22	3.67	7.55	8.56	8.24	5.9	6.17	5.43	6.08	5.43	4.97
TR10769_c0_g1	DNA-binding WRKY [Macleaya cordata]	Probable WRKY transcription factor 53 OS=Arabidopsis thaliana OX=3702 GN=WRKY53 PE=1 SV=1	WRKY DNA -binding domain	-	-	-	-	-	62.19	57.76	62.12	38.58	36.26	37.11	47.78	49.7	45.09	8.03	8.22	8.29
TR10769_c0_g2	-	-	-	-	-	-	-	-	29.83	39.92	30.24	0.88	0	0.42	0.43	0.41	0.87	2.9	0.95	1.54
TR10773_c0_g1	uncharacterized protein LOC17895969 [Capsella rubella]|EOA35967.1 hypothetical protein CARUB_v10021230mg [Capsella rubella]	-	-	-	-	-	-	-	11.69	10.39	11.12	11.16	10.87	15.86	3.25	6.76	5.27	6.72	6.44	11.93
TR1078_c1_g1	hypothetical protein CK203_020324 [Vitis vinifera]	-	Phosphatidylinositol-specific phospholipase C, X domain	-	-	-	-	-	15.95	18.76	18.22	49.26	49.06	50.06	118.23	117.69	107.05	301.18	288.97	313.93
TR10781_c0_g1	-	-	-	-	-	-	-	-	95.23	91.68	92.01	64.6	62.28	69.52	65.81	69.08	62.45	17.07	17.68	18
TR107817_c1_g3	PREDICTED: perforin-1 isoform X1 [Macaca fascicularis]|XP_011940721.1 PREDICTED: perforin-1 isoform X1 [Cercocebus atys]|XP_011940722.1 PREDICTED: perforin-1 isoform X1 [Cercocebus atys]|XP_015002938.1 PREDICTED: perforin-1 isoform X1 [Macaca mulatta]	-	MAC/Perforin domain;C2 domain	cell activation;immune system process;cell recognition;biological_process;cellular process;cell-cell recognition;leukocyte activation;lymphocyte activation;response to tumor cell;defense response;response to stress;response to biotic stimulus;response to stimulus;immune response;cellular component assembly;cellular component organization;protein-containing complex subunit organization;cellular co…	molecular_function;binding;metal ion binding;ion binding;cation binding;transporter activity;transmembrane transporter activity;channel activity;passive transmembrane transporter activity;calcium ion binding;wide pore channel activity	intracellular;cellular_component;lytic vacuole;membrane;lysosome;vacuole;cell;cytoplasm;intracellular membrane-bounded organelle;intrinsic component of membrane;organelle;membrane-bounded organelle;intracellular organelle;intracellular part;membrane part;cytoplasmic part;cell part;integral component of membrane;cytolytic granule	-	-	1.33	0.31	0.36	0.05	0.02	0.04	0.2	0.09	0.12	0.03	0.01	0.03
TR1079_c0_g1	PREDICTED: uncharacterized protein LOC104607398 [Nelumbo nucifera]	-	-	-	-	-	-	-	53.86	50.86	54.66	54.95	53.89	54.43	23.43	25.69	27.75	10.33	10.44	10.22
TR10793_c0_g1	hypothetical protein BVC80_807g4 [Macleaya cordata]	-	Domain of unknown function (DUF3479)	-	-	-	-	-	3.8	4.05	4.55	1.61	1.51	1.69	1.59	1.78	1.53	1.14	1.16	1.23
TR10799_c0_g1	NPC intracellular cholesterol transporter 2 precursor [Mus musculus]|Q9Z0J0.1 RecName: Full=NPC intracellular cholesterol transporter 2	-	ML domain	metabolic process;alcohol metabolic process;lipid metabolic process;biological_process;steroid metabolic process;sterol metabolic process;primary metabolic process;small molecule metabolic process;organic substance metabolic process;organic cyclic compound metabolic process;organic hydroxy compound metabolic process;secondary alcohol metabolic process;transport;lipid transport;lipid localization;…	molecular_function;binding;steroid binding;lipid binding;sterol binding;small molecule binding;alcohol binding;organic cyclic compound binding;protein binding;enzyme binding;cholesterol binding	intracellular;cellular_component;lytic vacuole;vacuole;extracellular region;extracellular space;cell;cytoplasm;intracellular membrane-bounded organelle;endomembrane system;vesicle;organelle;membrane-bounded organelle;intracellular organelle;extracellular organelle;extracellular region part;intracellular part;cytoplasmic part;cell part;extracellular vesicle;lysosome;extracellular exosome;endoplasm…	-	-	2.87	0.45	0.52	0.04	0.11	0.06	0.17	0.39	0.18	0	0.17	0.07
TR108_c2_g1	PREDICTED: disease resistance protein RPM1-like [Nelumbo nucifera]	-	-	-	-	-	-	-	2.06	2.51	2.47	3.37	3.68	3.68	2.05	2.05	1.09	1.86	1.7	1.25
TR10800_c0_g2	Ninja [Macleaya cordata]	Ninja-family protein AFP3 OS=Arabidopsis thaliana OX=3702 GN=AFP3 PE=1 SV=1	Putative nuclear localisation signal;Ethylene-responsive binding factor-associated repression;TPL-binding domain in jasmonate signalling	-	-	-	-	-	3.44	3.72	3.73	1.28	1.32	1.69	2.23	2.52	2.53	3.84	3.42	3.27
TR10803_c1_g1	beta-glucuronosyltransferase GlcAT14A isoform X1 [Arabidopsis lyrata subsp. lyrata]|EFH46995.1 glycosyltransferase family 14 protein [Arabidopsis lyrata subsp. lyrata]	Beta-glucuronosyltransferase GlcAT14A OS=Arabidopsis thaliana OX=3702 GN=GLCAT14A PE=2 SV=1	-	-	-	-	-	-	0.27	0.24	0.25	0.49	0.54	0.68	0.56	0.64	0.69	0.74	0.62	0.67
TR10810_c0_g1	Cupredoxin superfamily protein isoform 1 [Theobroma cacao]|EOY00930.1 Cupredoxin superfamily protein isoform 1 [Theobroma cacao]	Multicopper oxidase LPR2 OS=Arabidopsis thaliana OX=3702 GN=LPR2 PE=2 SV=1	Multicopper oxidase;Multicopper oxidase;Multicopper oxidase	-	-	-	-	-	9.55	10.18	8.98	3.85	3.69	4.45	2.87	3.2	2.8	2.06	1.72	1.66
TR10811_c0_g1	CTD nuclear envelope phosphatase 1 [Homo sapiens]|NP_001137247.1 CTD nuclear envelope phosphatase 1 [Homo sapiens]|XP_002718860.1 PREDICTED: CTD nuclear envelope phosphatase 1 [Oryctolagus cuniculus]|XP_002748022.1 PREDICTED: CTD nuclear envelope phosphatase 1 isoform X1 [Callithrix jacchus]|XP_003929191.1 PREDICTED: CTD nuclear envelope phosphatase 1 isoform X1 [Saimiri boliviensis boliviensis]|…	-	NLI interacting factor-like phosphatase	metabolic process;cellular protein modification process;phosphorus metabolic process;phosphate-containing compound metabolic process;nitrogen compound metabolic process;biological_process;cellular process;dephosphorylation;protein metabolic process;protein modification process;macromolecule metabolic process;macromolecule modification;cellular metabolic process;primary metabolic process;cellular …	molecular_function;binding;catalytic activity;phosphoprotein phosphatase activity;hydrolase activity;hydrolase activity, acting on ester bonds;phosphatase activity;phosphoric ester hydrolase activity;catalytic activity, acting on a protein;protein binding;protein serine/threonine phosphatase activity	intracellular;cellular_component;membrane;cell;nucleus;nuclear envelope;cytoplasm;endoplasmic reticulum;intracellular membrane-bounded organelle;protein serine/threonine phosphatase complex;endomembrane system;organelle membrane;intrinsic component of membrane;organelle envelope;envelope;organelle subcompartment;protein-containing complex;nuclear outer membrane-endoplasmic reticulum membrane netw…	-	-	1.95	0.67	0.58	0.17	0.09	0.24	0.81	0.25	0.15	0.18	0.08	0.18
TR108123_c0_g1	PREDICTED: basic blue protein-like [Elaeis guineensis]	Basic blue protein OS=Arabidopsis thaliana OX=3702 GN=ARPN PE=2 SV=2	Plastocyanin-like domain	-	-	-	-	-	2.04	2.73	1.33	0.19	0.13	0	0	0.26	0	0.16	0.08	0.16
TR10814_c0_g2	cyclin-U4-1 [Manihot esculenta]|OAY49440.1 hypothetical protein MANES_05G056500 [Manihot esculenta]	Cyclin-U4-1 OS=Arabidopsis thaliana OX=3702 GN=CYCU4-1 PE=1 SV=1	Cyclin;Cyclin, N-terminal domain	-	-	-	-	-	1.7	2.68	1.56	0.97	0.91	1.11	0.34	0.42	0.35	2.54	2.83	4.25
TR108155_c0_g2	PREDICTED: LRR receptor-like serine/threonine-protein kinase RPK2 [Nelumbo nucifera]|XP_010249275.1 PREDICTED: LRR receptor-like serine/threonine-protein kinase RPK2 [Nelumbo nucifera]|XP_010249277.1 PREDICTED: LRR receptor-like serine/threonine-protein kinase RPK2 [Nelumbo nucifera]|XP_010249280.1 PREDICTED: LRR receptor-like serine/threonine-protein kinase RPK2 [Nelumbo nucifera]|XP_010249281.1…	LRR receptor-like serine/threonine-protein kinase RPK2 OS=Arabidopsis thaliana OX=3702 GN=RPK2 PE=2 SV=1	Protein kinase domain;Protein tyrosine kinase;Leucine rich repeat;Leucine Rich repeats (2 copies);Leucine Rich Repeat;Leucine rich repeat N-terminal domain;Leucine Rich repeat;Protein kinase domain;Protein tyrosine kinase;Leucine rich repeat;Leucine Rich repeats (2 copies);Leucine Rich Repeat;Leucine rich repeat N-terminal domain;Leucine Rich repeat	-	-	-	-	-	0.18	0.18	0.22	0.33	0.29	0.27	0.24	0.25	0.27	0.98	0.91	0.85
TR10817_c0_g2	alpha,alpha-trehalose-phosphate synthase [UDP-forming] 1-like [Dendrobium catenatum]|XP_020683516.1 alpha,alpha-trehalose-phosphate synthase [UDP-forming] 1-like [Dendrobium catenatum]|XP_020683517.1 alpha,alpha-trehalose-phosphate synthase [UDP-forming] 1-like [Dendrobium catenatum]|XP_020683518.1 alpha,alpha-trehalose-phosphate synthase [UDP-forming] 1-like [Dendrobium catenatum]|XP_020683519.1…	Alpha,alpha-trehalose-phosphate synthase [UDP-forming] 1 OS=Arabidopsis thaliana OX=3702 GN=TPS1 PE=1 SV=1	-	-	-	-	-	-	0.22	0.34	0.53	2.13	2.14	2.22	0	0.38	0.54	0	0.08	0
TR10820_c1_g1	-	-	-	-	-	-	-	-	0.25	0.14	0.17	0.85	1.32	0.98	0	0.06	0.09	1.43	0.98	1.13
TR10821_c1_g1	hypothetical protein Ahy_Scaffold1g107374 isoform A [Arachis hypogaea]	-	-	-	-	-	-	-	32.06	34.91	33.17	63.26	60.57	63.01	35.2	38.92	35.81	94.05	94.95	91.97
TR10823_c0_g1	-	-	-	-	-	-	-	-	1.68	1.46	1.36	0	0	0	0	0.12	0.09	0	0	0
TR10826_c0_g1	-	-	-	-	-	-	-	-	167.84	193.22	192.48	270.56	271.46	267.47	431.72	458.06	475.65	192.33	192.82	172.86
TR10827_c0_g1	PREDICTED: uncharacterized protein LOC104607635 [Nelumbo nucifera]	-	Pollen proteins Ole e I like	-	-	-	-	-	2.45	2.61	2.43	0.12	0.17	0.09	0	0	0.18	0	0	0.11
TR108310_c0_g1	-	-	-	-	-	-	-	-	0	0	0.08	0.09	0.12	0.04	0.25	0.32	0.17	1.97	2.02	2.08
TR10834_c0_g1	hypothetical protein AQUCO_03900117v1 [Aquilegia coerulea]	Protein DELAY OF GERMINATION 1 OS=Arabidopsis thaliana OX=3702 GN=DOG1 PE=1 SV=1	Seed dormancy control	-	-	-	-	-	3.08	3.63	3.7	2.62	2.78	3.29	4.34	4.43	4.26	0.42	0.3	0.35
TR10836_c0_g1	Protein kinase domain [Macleaya cordata]	Mitogen-activated protein kinase kinase kinase 17 OS=Arabidopsis thaliana OX=3702 GN=MAPKKK17 PE=1 SV=1	-	-	-	-	-	-	13.82	9.1	13.58	22.74	18.62	29.19	106.78	105.48	103.33	17.76	16.92	16.26
TR10837_c0_g1	hypothetical protein AQUCO_00500422v1 [Aquilegia coerulea]	Beta-amylase OS=Glycine max OX=3847 GN=BMY1 PE=1 SV=3	Glycosyl hydrolase family 14	-	-	-	-	-	1.03	1.09	1.17	0.14	0.11	0.15	0.09	0.14	0.23	0.25	0.16	0.03
TR108486_c1_g1	-	-	-	-	-	-	-	-	0.18	0.18	0.16	0.07	0.15	0.21	0.95	1	0.94	0.26	0.31	0.13
TR1085_c0_g1	PREDICTED: sulfoquinovosyl transferase SQD2 isoform X1 [Vitis vinifera]	Sulfoquinovosyl transferase SQD2 OS=Arabidopsis thaliana OX=3702 GN=SQD2 PE=1 SV=1	Glycosyltransferase Family 4;Glycosyl transferases group 1;Glycosyl transferases group 1;Glycosyl transferases group 1;Glycosyl transferases group 1;Glycosyl transferases group 1;Glycosyl transferases group 1	-	-	-	-	-	8.53	8.18	8.13	11.11	10.9	11.2	33.97	36.26	36.14	16.15	16.95	16.89
TR1085_c0_g2	hypothetical protein AQUCO_00400305v1 [Aquilegia coerulea]	Sulfoquinovosyl transferase SQD2 OS=Arabidopsis thaliana OX=3702 GN=SQD2 PE=1 SV=1	-	-	-	-	-	-	7.6	8.05	8.24	6.32	9.88	6.53	36	34.91	36.71	6.14	4.77	3.85
TR10851_c0_g2	Nuclear pore complex protein NUP205 [Zea mays]|AQK94589.1 Nuclear pore complex protein NUP205 [Zea mays]|AQK94591.1 Nuclear pore complex protein NUP205 [Zea mays]|AQK94594.1 Nuclear pore complex protein NUP205 [Zea mays]|AQK94595.1 Nuclear pore complex protein NUP205 [Zea mays]	-	-	-	-	-	-	-	0.04	0.11	0	0.55	0.56	0.82	0.25	0.18	0.21	0	0.02	0.1
TR108536_c0_g2	-	-	-	-	-	-	-	-	1.55	0.46	0.43	0.03	0.13	0.07	0.25	0.19	0.12	0.01	0.01	0.01
TR108536_c0_g3	-	-	-	-	-	-	-	-	0.86	0.25	0.42	0.07	0.04	0.02	0.23	0.05	0.06	0.14	0.02	0.02
TR10858_c0_g1	-	-	-	-	-	-	-	-	85.57	92.88	118.28	48.84	67.38	50.75	146.74	167.19	156.5	132.96	131.42	141.07
TR10866_c0_g2	-	-	-	-	-	-	-	-	3.22	3.06	2.32	1.01	0.92	1.14	3.65	2.46	3.55	0.71	0.51	0.12
TR10870_c0_g1	hypothetical protein A8B94_11150 [Bordetella pertussis]	-	-	-	-	-	-	-	167.91	79.58	268.14	23.54	28.35	33.58	124.3	19.94	90.16	34.36	15.93	27.49
TR108722_c0_g1	PREDICTED: uncharacterized protein LOC104597668 [Nelumbo nucifera]|XP_010257668.1 PREDICTED: uncharacterized protein LOC104597668 [Nelumbo nucifera]|XP_010257676.1 PREDICTED: uncharacterized protein LOC104597668 [Nelumbo nucifera]|XP_010257687.1 PREDICTED: uncharacterized protein LOC104597668 [Nelumbo nucifera]	-	-	-	-	-	-	-	3.21	3.87	3.65	0.64	0.72	0.45	0.46	0.29	0.61	0.19	0.09	0.19
TR10873_c0_g2	Ribosomal protein L7A/L8 [Macleaya cordata]	60S ribosomal protein L7a-2 OS=Arabidopsis thaliana OX=3702 GN=RPL7AB PE=2 SV=1	-	-	-	-	-	-	70.61	82.54	71.58	24.9	30.58	29.91	18.89	17.93	29.97	12.81	17.63	12.65
TR10873_c0_g3	60S ribosomal protein L7a-1-like [Papaver somniferum]|RZC82790.1 hypothetical protein C5167_045577 [Papaver somniferum]	60S ribosomal protein L7a-2 OS=Arabidopsis thaliana OX=3702 GN=RPL7AB PE=2 SV=1	-	-	-	-	K02936|RP-L7Ae, RPL7A; large subunit ribosomal protein L7Ae	ko03010(Genetic Information Processing)	19	19.39	18.14	26.63	27.04	23.74	10.78	11.56	12.31	7.43	9.37	8.71
TR10874_c0_g1	hypothetical protein CQW23_34849 [Capsicum baccatum]	-	-	-	-	-	-	-	3691.02	3944.78	5406.6	4130.97	4328.31	4161.61	2578.15	2131.74	1823.32	2194.29	1921.44	3070.25
TR10876_c0_g1	C2 calcium-dependent membrane targeting [Macleaya cordata]	BON1-associated protein 2 OS=Arabidopsis thaliana OX=3702 GN=BAP2 PE=1 SV=1	C2 domain	-	-	-	-	-	12.07	12.21	12.06	5.22	4.94	4.9	4.36	5.46	4.78	3.78	2.85	3.18
TR10879_c0_g1	-	-	-	-	-	-	-	-	1.35	1.41	1.15	3.3	3.13	3.98	2.88	2.79	2.55	0.59	0.75	0.59
TR1088_c0_g2	PREDICTED: zinc finger CCHC domain-containing protein 7 [Vitis vinifera]	RING-H2 finger protein ATL73 OS=Arabidopsis thaliana OX=3702 GN=ATL73 PE=2 SV=1	Zinc knuckle;Ring finger domain;RING-like zinc finger;Zinc finger, C3HC4 type (RING finger);RING-H2 zinc finger domain;Zinc finger, C3HC4 type (RING finger)	-	-	-	-	-	24.86	27.69	26.87	55.73	54.15	51.96	57.09	60.65	55.65	72.23	71.33	73.6
TR10883_c0_g1	hypothetical protein AQUCO_00500442v1 [Aquilegia coerulea]	Cysteine-rich receptor-like protein kinase 11 OS=Arabidopsis thaliana OX=3702 GN=CRK11 PE=2 SV=2	Protein tyrosine kinase;Protein kinase domain	-	-	-	-	-	12.88	14.24	17.63	19.84	21.72	20.63	16.62	17.37	17.42	7.29	5.79	7.61
TR10886_c0_g1	-	-	Leucine rich repeat;Leucine Rich repeats (2 copies);Leucine Rich Repeat	-	-	-	-	-	1.38	0.75	1.31	2.71	3.16	3.37	1.56	1.79	1.4	6.27	5.69	5.35
TR1089_c3_g1	PREDICTED: caffeic acid 3-O-methyltransferase 1 [Nelumbo nucifera]	Caffeic acid 3-O-methyltransferase 1 OS=Populus tremuloides OX=3693 GN=OMT1 PE=1 SV=1	O-methyltransferase;Dimerisation domain	-	-	-	K13066|COMT; caffeic acid 3-O-methyltransferase / acetylserotonin O-methyltransferase [EC:2.1.1.68 2.1.1.4]	ko00380(Metabolism);ko00940(Metabolism);ko01100(Metabolism);ko01110(Metabolism)	38.84	40.87	42.21	15.56	15.87	15.82	37.7	40.29	36.9	17.82	16.6	15.93
TR1089_c5_g1	-	-	-	-	-	-	-	-	23.04	33.83	31.49	0.69	1.82	0.5	2.54	2.69	0.48	1.24	0.56	0
TR10891_c0_g1	Protein kinase domain [Macleaya cordata]	G-type lectin S-receptor-like serine/threonine-protein kinase At5g24080 OS=Arabidopsis thaliana OX=3702 GN=At5g24080 PE=2 SV=1	Protein kinase domain;Protein tyrosine kinase;D-mannose binding lectin;S-locus glycoprotein domain	-	-	-	-	-	2.74	3.28	3.33	0.63	0.55	0.77	0.98	0.83	0.61	0.37	0.38	0.33
TR10891_c0_g2	Protein kinase domain [Macleaya cordata]	G-type lectin S-receptor-like serine/threonine-protein kinase At5g24080 OS=Arabidopsis thaliana OX=3702 GN=At5g24080 PE=2 SV=1	D-mannose binding lectin;S-locus glycoprotein domain;Protein kinase domain;Protein tyrosine kinase	-	-	-	-	-	0.6	1.03	0.61	0.12	0.26	0.19	0.23	0.33	0.22	0.38	0.43	0.46
TR10894_c0_g1	Taurine catabolism dioxygenase TauD/TfdA [Macleaya cordata]	Clavaminate synthase-like protein At3g21360 OS=Arabidopsis thaliana OX=3702 GN=At3g21360 PE=1 SV=1	Taurine catabolism dioxygenase TauD, TfdA family	-	-	-	-	-	32.11	31.9	32	19.4	20.63	20.08	16.25	16.33	17.63	45	46.88	42.15
TR10898_c0_g1	hypothetical protein AQUCO_01400208v1 [Aquilegia coerulea]	Pentatricopeptide repeat-containing protein At1g10910, chloroplastic OS=Arabidopsis thaliana OX=3702 GN=At1g10910 PE=2 SV=1	PPR repeat family;PPR repeat;PPR repeat;Pentatricopeptide repeat domain;Pentacotripeptide-repeat region of PRORP	-	-	-	-	-	1.92	2.13	2.4	0.72	0.95	0.66	1.69	1.98	1.65	2.76	2.58	2.48
TR1090_c1_g1	Small heat shock protein isoform 2 [Theobroma cacao]	Small heat shock protein, chloroplastic (Fragment) OS=Glycine max OX=3847 GN=HSP22 PE=2 SV=1	Hsp20/alpha crystallin family	-	-	-	K13993|HSP20; HSP20 family protein	ko04141(Genetic Information Processing)	0.52	0.45	0.6	0.47	0.94	1.26	8.44	6.93	7.63	0.37	0.35	0.55
TR10906_c0_g1	-	-	-	-	-	-	-	-	9.39	8.5	10.96	1.89	2.24	1.57	1.52	3.07	3.63	2.6	4.89	2.21
TR1091_c0_g1	alcohol dehydrogenase [Actinidia chinensis var. chinensis]	Alcohol dehydrogenase 1 OS=Solanum tuberosum OX=4113 GN=ADH1 PE=1 SV=1	Zinc-binding dehydrogenase;Alcohol dehydrogenase GroES-like domain;Glucose dehydrogenase C-terminus	-	-	-	K18857|ADH1; alcohol dehydrogenase class-P [EC:1.1.1.1]	ko00010(Metabolism);ko00071(Metabolism);ko00350(Metabolism);ko00592(Metabolism);ko00620(Metabolism);ko01100(Metabolism);ko01110(Metabolism);ko01120(Metabolism)	100.45	101.11	99.49	89.72	84.81	86.4	184.58	182.33	188.91	461.25	475.91	446.73
TR1091_c1_g1	PREDICTED: uncharacterized protein LOC104596144 [Nelumbo nucifera]	-	-	-	-	-	-	-	70.16	72.66	69.22	84.89	84.44	85.91	21.26	21.15	21.59	23.45	22.64	26.44
TR1091_c1_g2	-	Vacuolar-processing enzyme OS=Citrus sinensis OX=2711 PE=2 SV=1	-	-	-	-	-	-	4.62	4.38	3.89	4.93	6.04	5.25	5	4.83	5.36	9.38	8.86	9.34
TR10910_c0_g1	-	-	-	-	-	-	-	-	3.41	0.7	1.78	3.16	8.03	2.8	2.01	3.05	0	75.4	167.84	63.45
TR109100_c0_g1	septin-1 isoform X1 [Homo sapiens]	-	Septin	-	-	-	-	-	1.14	0.38	0.22	0	0	0	0	0.14	0.15	0.09	0	0
TR1092_c2_g1	SWEET sugar transporter [Macleaya cordata]	Bidirectional sugar transporter SWEET14 OS=Oryza sativa subsp. japonica OX=39947 GN=SWEET14 PE=2 SV=1	Sugar efflux transporter for intercellular exchange	-	-	-	-	-	34.2	32.43	32.17	18.68	21.37	20.24	56.92	61.91	61.76	88.67	91.48	88.88
TR10929_c0_g1	-	-	-	-	-	-	-	-	12.92	14.25	11.76	5.08	4.07	2.8	6.06	7.63	5.98	4.64	4.91	4.93
TR10935_c1_g1	-	Eukaryotic translation initiation factor 5A-1 OS=Solanum lycopersicum OX=4081 PE=2 SV=1	-	-	-	-	-	-	14.6	11.9	10	3.5	3.32	2.88	5.44	5.25	8.05	7.56	5.52	7.48
TR10942_c0_g1	hypothetical protein AQUCO_05700026v1 [Aquilegia coerulea]	Protein SRG1 OS=Arabidopsis thaliana OX=3702 GN=SRG1 PE=2 SV=1	non-haem dioxygenase in morphine synthesis N-terminal;2OG-Fe(II) oxygenase superfamily	-	-	-	-	-	9.11	9.65	8.87	29.15	27.8	29.37	36.03	37.75	38.75	30.86	29.28	29.28
TR10943_c0_g1	PREDICTED: LOW QUALITY PROTEIN: uncharacterized protein LOC104590182 [Nelumbo nucifera]	Cysteine-rich receptor-like protein kinase 25 OS=Arabidopsis thaliana OX=3702 GN=CRK25 PE=3 SV=1	Salt stress response/antifungal	-	-	-	-	-	7.02	7.53	7.27	11.19	10.47	10.63	11.34	11.16	8.96	3.55	3.46	3.45
TR10946_c0_g1	PREDICTED: uncharacterized protein LOC105955856 [Erythranthe guttata]	RNA-directed DNA polymerase homolog OS=Oenothera berteroana OX=3950 PE=4 SV=1	Reverse transcriptase (RNA-dependent DNA polymerase);Reverse transcriptase-like;Integrase core domain;RNase H;Retrotransposon gag protein	-	-	-	-	-	0.58	0.74	0.93	0.47	0.52	0.42	1.67	1.78	1.54	1.34	1.23	1.32
TR109465_c0_g1	hypothetical protein SNOG_15989 [Parastagonospora nodorum SN15]|EAT76568.2 hypothetical protein SNOG_15989 [Parastagonospora nodorum SN15]	-	-	-	-	-	-	-	2.5	1.26	1.12	0	0	0	0	0	0	0	0	0
TR10948_c0_g1	hypothetical protein BVC80_8723g12 [Macleaya cordata]	Sucrose transport protein SUC4 OS=Arabidopsis thaliana OX=3702 GN=SUC4 PE=1 SV=2	MFS/sugar transport protein	-	-	-	-	-	1.09	1.23	1.08	0.88	0.87	0.88	2.72	2.48	2.15	1.63	1.73	1.83
TR1095_c0_g3	plasma membrane H+ ATPase [Lilium longiflorum]	Plasma membrane ATPase OS=Oryza sativa subsp. japonica OX=39947 GN=Os04g0656100 PE=2 SV=1	-	-	-	-	-	-	2.3	2.66	2.46	6.03	6.91	8.26	1.96	2.86	1.63	2.39	3.29	4.71
TR10950_c0_g1	PREDICTED: afadin- and alpha-actinin-binding protein isoform X1 [Nelumbo nucifera]	-	Afadin- and alpha -actinin-Binding	-	-	-	K06085|SSX2IP, ADIP; synovial sarcoma, X breakpoint 2 interacting protein	ko04520(Cellular Processes)	5.2	5.71	5.99	5	4.63	5	2.68	2.29	2.22	3.09	3.15	2.98
TR10955_c0_g1	beta-glucosidase 18 [Oryza sativa Japonica Group]|Q7XSK0.2 RecName: Full=Beta-glucosidase 18	Beta-glucosidase 18 OS=Oryza sativa subsp. japonica OX=39947 GN=BGLU18 PE=3 SV=2	-	metabolic process;biological_process;primary metabolic process;organic substance metabolic process;carbohydrate derivative metabolic process;carbohydrate metabolic process;glycosyl compound metabolic process	molecular_function;catalytic activity;hydrolase activity, hydrolyzing O-glycosyl compounds;glucosidase activity;hydrolase activity;hydrolase activity, acting on glycosyl bonds;scopolin beta-glucosidase activity;beta-glucosidase activity	-	-	-	11.01	12.07	10.05	43.22	41.76	40.67	69.71	73.33	77.12	103.09	98.82	95.67
TR10957_c0_g1	PREDICTED: cytochrome P450 89A2-like [Nelumbo nucifera]	Cytochrome P450 89A2 OS=Arabidopsis thaliana OX=3702 GN=CYP89A2 PE=2 SV=2	Cytochrome P450	-	-	-	-	-	0	0.09	0.1	0.03	0	0	4.37	4.91	3.09	0.26	0.06	0.13
TR10961_c0_g1	Ribosome-binding ATPase [Actinidia chinensis var. chinensis]	Obg-like ATPase 1 OS=Oryza sativa subsp. japonica OX=39947 GN=YchF1 PE=1 SV=1	Protein of unknown function (DUF933);50S ribosome-binding GTPase;Ferrous iron transport protein B	-	-	-	-	-	6.98	7.3	7.19	9.94	10.45	11.73	4.83	5.02	4.56	3.73	4	3.94
TR109617_c0_g1	vesicular glutamate transporter 1 [Rattus norvegicus]|Q62634.1 RecName: Full=Vesicular glutamate transporter 1	Probable anion transporter 1, chloroplastic OS=Oryza sativa subsp. japonica OX=39947 GN=PHT4	Major Facilitator Superfamily	regulation of neurotransmitter levels;biological_process;localization;maintenance of location;biological regulation;regulation of biological quality;eye development;multicellular organism development;sensory organ development;multicellular organismal process;developmental process;camera-type eye development;animal organ development;system development;anatomical structure development;sensory syste…	molecular_function;transporter activity;transmembrane transporter activity;secondary active transmembrane transporter activity;inorganic molecular entity transmembrane transporter activity;active transmembrane transporter activity;ion channel activity;extracellular ligand-gated ion channel activity;excitatory extracellular ligand-gated ion channel activity;extracellularly glutamate-gated ion chan…	intracellular;cellular_component;membrane;cell;cytoplasm;transport vesicle;transport vesicle membrane;synaptic vesicle;endomembrane system;vesicle membrane;neuron projection;axon;cytoplasmic vesicle membrane;organelle membrane;intrinsic component of membrane;cytoplasmic vesicle;vesicle;cell projection;organelle;membrane-bounded organelle;intracellular organelle;organelle part;intracellular part;m…	-	-	2.16	0.88	0.71	0.12	0.18	0.16	0.44	0.26	0.15	0.09	0.06	0.12
TR10962_c0_g1	-	-	-	-	-	-	-	-	1.13	0.9	1.06	3.43	3.49	4.98	6.11	6.27	4.04	1.3	2.62	2.61
TR10963_c1_g1	hypothetical protein BVC80_1713g14 [Macleaya cordata]	-	-	-	-	-	-	-	1.06	1.36	1.26	2.53	2.52	2.45	3.01	3.18	3.3	3.71	4.28	4.18
TR10971_c0_g1	-	-	-	-	-	-	-	-	1.3	1.07	1.23	1.44	1.49	1.18	0.56	0.37	0.36	0.2	0.14	0.16
TR1098_c0_g1	polyphenol oxidase [Sinopodophyllum hexandrum]	Polyphenol oxidase, chloroplastic OS=Malus domestica OX=3750 PE=2 SV=1	Protein of unknown function (DUF_B2219);Common central domain of tyrosinase;Polyphenol oxidase middle domain	-	-	-	K00422|E1.10.3.1; polyphenol oxidase [EC:1.10.3.1]	ko00350(Metabolism);ko00950(Metabolism);ko01100(Metabolism);ko01110(Metabolism)	30.42	33.04	33.46	44.9	45.83	46.8	100.93	96.32	96.12	40.72	38.92	40.23
TR1098_c1_g1	Glycoside hydrolase [Macleaya cordata]	Beta-amylase 3, chloroplastic OS=Arabidopsis thaliana OX=3702 GN=BAM3 PE=1 SV=3	Glycosyl hydrolase family 14	-	-	-	-	-	384.85	379.58	389.03	271	272.04	270.99	105.28	100.7	106.52	65.59	65.99	60.45
TR1098_c2_g1	-	-	-	-	-	-	-	-	6.51	6.15	5.04	14.31	12.7	13.44	8.03	7.41	9.24	4.67	4.96	4.57
TR10980_c0_g1	conserved hypothetical protein [Clostridium botulinum NCTC 2916]|ACO84169.1 conserved hypothetical protein [Clostridium botulinum A2 str. Kyoto]|ACO84581.1 conserved hypothetical protein [Clostridium botulinum A2 str. Kyoto]|ACO84816.1 conserved hypothetical protein [Clostridium botulinum A2 str. Kyoto]|ACO85613.1 conserved hypothetical protein [Clostridium botulinum A2 str. Kyoto]|ACO85708.1 con…	-	-	-	-	-	-	-	7.68	3.67	4.57	0.16	0.22	0.21	1.16	0	0	0	0	0.28
TR10983_c0_g1	hypothetical protein BVC80_1211g54 [Macleaya cordata]	LOB domain-containing protein 41 OS=Arabidopsis thaliana OX=3702 GN=LBD41 PE=2 SV=1	Lateral organ boundaries (LOB) domain	-	-	-	-	-	0.86	0.66	0.67	0.4	0.09	0.19	1.42	0.82	1.57	0.52	0.34	0.41
TR1099_c0_g2	ACT domain [Macleaya cordata]	ACT domain-containing protein ACR9 OS=Arabidopsis thaliana OX=3702 GN=ACR9 PE=2 SV=1	ACT domain	-	-	-	-	-	13.91	15.3	15.26	21.55	20.61	20.08	19.38	19.92	19.51	55.33	51.23	52.58
TR10991_c0_g3	PREDICTED: transaldolase [Cercocebus atys]|XP_025210933.1 transaldolase isoform X2 [Theropithecus gelada]	-	Transaldolase/Fructose-6-phosphate aldolase	-	-	-	K00616|E2.2.1.2, talA, talB; transaldolase [EC:2.2.1.2]	ko00030(Metabolism);ko01100(Metabolism);ko01110(Metabolism);ko01120(Metabolism);ko01200(Metabolism);ko01230(Metabolism)	2.61	0.81	1.05	0.11	0.2	0.41	0.67	0.33	0.32	0.25	0.06	0.26
TR10992_c0_g1	hypothetical protein PHACADRAFT_179284 [Phanerochaete carnosa HHB-10118-sp]|EKM49267.1 hypothetical protein PHACADRAFT_179284 [Phanerochaete carnosa HHB-10118-sp]	-	-	-	-	-	-	-	467.19	88.96	213.28	49.34	55.28	62.7	315.04	29.58	47.3	37.24	37.14	13.47
TR10997_c1_g1	PREDICTED: uncharacterized protein LOC104592692 [Nelumbo nucifera]	-	-	-	-	-	-	-	0.59	0.59	0.81	0	0.06	0.24	1.84	0.98	1.72	0.76	0.98	0.84
TR11_c3_g1	-	-	-	-	-	-	-	-	2.75	2.44	3.53	0.69	0.7	0.82	1.14	1.05	1.17	1.79	1.64	1.5
TR110_c3_g1	DAHP synthetase [Macleaya cordata]	Phospho-2-dehydro-3-deoxyheptonate aldolase 2, chloroplastic OS=Solanum lycopersicum OX=4081 PE=2 SV=1	Class-II DAHP synthetase family	-	-	-	K01626|E2.5.1.54, aroF, aroG, aroH; 3-deoxy-7-phosphoheptulonate synthase [EC:2.5.1.54]	ko00400(Metabolism);ko01100(Metabolism);ko01110(Metabolism);ko01230(Metabolism);ko02024(Cellular Processes)	283.43	298.98	294.32	322.72	315.34	309.52	404.61	410.06	377.68	124.64	126.54	123.72
TR1100_c1_g1	PREDICTED: cytochrome P450 CYP72A219-like [Nelumbo nucifera]	Cytochrome P450 CYP72A219 OS=Panax ginseng OX=4054 PE=2 SV=1	Cytochrome P450;Cytochrome P450	-	-	-	-	-	2.14	2.39	2.21	1.63	1.39	1.24	6.52	6.45	5.06	9.53	10.26	10.08
TR11000_c0_g1	Protein of unknown function DUF506 [Macleaya cordata]	-	PDDEXK-like family of unknown function;PDDEXK-like family of unknown function	-	-	-	-	-	3	3.56	3.74	6.38	7.19	6.81	15.4	15.75	14.54	6.56	7.15	7.01
TR11000_c0_g2	PREDICTED: uncharacterized protein LOC104613266 [Nelumbo nucifera]	-	PDDEXK-like family of unknown function	-	-	-	-	-	19.17	21.74	20.47	17.73	16.03	17.46	15.04	16.36	16.73	6.16	5.69	5.58
TR11008_c0_g1	-	-	-	-	-	-	-	-	0.57	0.49	0.63	0.34	0.5	0.62	1.25	1.46	1.45	0.17	0.19	0.21
TR11009_c0_g1	-	-	-	-	-	-	-	-	0.07	0.21	0.72	0	0.15	0.24	1.35	1.11	1.55	0	0	0
TR1101_c1_g1	PREDICTED: auxin-responsive protein SAUR32-like [Juglans regia]	Auxin-responsive protein SAUR32 OS=Arabidopsis thaliana OX=3702 GN=SAUR32 PE=2 SV=1	Auxin responsive protein;Auxin responsive protein	-	-	-	K14488|SAUR; SAUR family protein	ko04075(Environmental Information Processing)	160.2	160.96	158.57	138.65	142.99	142.2	44.49	47.04	50.15	16.98	15.94	17.75
TR1101_c3_g1	PREDICTED: protein canopy-1 [Nelumbo nucifera]	-	TLR4 regulator and MIR-interacting MSAP	-	-	-	-	-	24.15	27.84	25.99	6.79	6.87	7.67	7.63	7.18	7.07	8.75	7.72	7.79
TR11010_c0_g1	PREDICTED: non-classical arabinogalactan protein 31-like [Nelumbo nucifera]	-	-	-	-	-	-	-	0	0	0	0	0	0	46.68	41	35.56	0	0	2.45
TR11028_c0_g1	hypothetical protein AQUCO_03000400v1 [Aquilegia coerulea]	Protein argonaute 2 OS=Arabidopsis thaliana OX=3702 GN=AGO2 PE=1 SV=1	Piwi domain;N-terminal domain of argonaute;PAZ domain;Argonaute linker 1 domain;Argonaute linker 2 domain	-	-	-	-	-	13.42	14.07	11.77	18.13	16.91	17.77	29.83	28.55	27.46	7.47	7.05	7.24
TR11029_c0_g1	-	-	-	-	-	-	-	-	32.53	25.39	18.33	20.96	36.97	26.99	2.01	3.41	0.91	21.12	13.02	13.09
TR110295_c2_g1	PREDICTED: uncharacterized protein LOC104807711 isoform X1 [Tarenaya hassleriana]	-	-	-	-	-	-	-	0.38	0.19	0.52	0.93	1.56	1.38	0.22	0.18	0.3	0.54	0.17	0.18
TR11031_c0_g1	-	Metallothionein-like protein 1 OS=Cicer arietinum OX=3827 PE=3 SV=1	-	-	-	-	-	-	1.97	2.5	2.32	2.73	4.41	2.41	40.01	41.35	35.46	13.9	12.59	12.28
TR11035_c0_g1	ribosomal protein L4 variant, partial [Homo sapiens]	60S ribosomal protein L4 OS=Prunus armeniaca OX=36596 GN=RPL4 PE=2 SV=1	Ribosomal protein L4/L1 family	-	-	-	-	-	12.02	0.43	2.13	0.18	0.24	0.51	0.52	0.5	0	0	0	0
TR11036_c0_g1	PREDICTED: glucan endo-1,3-beta-glucosidase [Nelumbo nucifera]	Glucan endo-1,3-beta-glucosidase 2 OS=Arabidopsis thaliana OX=3702 GN=At1g66250 PE=2 SV=2	-	-	-	-	-	-	9.18	7.22	7.13	83.98	91.47	86.39	88.28	87.23	92.45	0	0.82	2.36
TR11038_c0_g1	F-box domain [Macleaya cordata]	F-box/kelch-repeat protein At1g30090 OS=Arabidopsis thaliana OX=3702 GN=At1g30090 PE=2 SV=1	-	-	-	-	-	-	33.01	37.05	37.49	27.98	27.93	23.14	10.65	10.17	8.95	11.92	14.09	12.16
TR1104_c1_g1	-	-	-	-	-	-	-	-	9.48	9.72	11.71	9.38	9.85	7.84	3.4	3.06	4.05	1.53	0.86	2.51
TR11041_c0_g1	-	-	-	-	-	-	-	-	8.04	9.88	14.01	28.8	31.22	31.2	23.97	29.75	24	31.27	33.79	33.59
TR11042_c0_g1	PREDICTED: transcription factor IBH1 [Nelumbo nucifera]	Transcription factor IBH1 OS=Arabidopsis thaliana OX=3702 GN=IBH1 PE=1 SV=1	-	-	-	-	-	-	4.84	5.07	5.46	4.48	3.92	2.85	4.94	5.65	5.67	12.23	12.7	13.24
TR11043_c0_g1	hypothetical protein VITISV_040070 [Vitis vinifera]	-	-	-	-	-	-	-	0.48	0.4	0.48	1.06	1.02	1.17	0.37	0.29	0.14	0.04	0.01	0.06
TR11045_c1_g1	Protein kinase domain [Macleaya cordata]	Phytosulfokine receptor 2 OS=Arabidopsis thaliana OX=3702 GN=PSKR2 PE=2 SV=1	Protein kinase domain;Protein tyrosine kinase;Leucine rich repeat;Leucine Rich repeats (2 copies);Leucine Rich Repeat;Leucine rich repeat N-terminal domain	-	-	-	-	-	0.43	0.45	0.62	1.21	1.54	1.21	1.11	1.73	1.59	1.12	1.04	0.97
TR11045_c2_g1	interleukin-7 receptor subunit alpha precursor [Macaca fascicularis]|Q38IC7.1 RecName: Full=Interleukin-7 receptor subunit alpha	-	Fibronectin type III domain	signal transduction;cell communication;cell surface receptor signaling pathway;biological_process;cellular process;response to organic substance;signaling;cellular response to chemical stimulus;response to cytokine;response to chemical;regulation of biological process;regulation of cellular process;response to stimulus;cellular response to stimulus;biological regulation;cellular response to organ…	molecular_function;transmembrane signaling receptor activity;signaling receptor activity;molecular transducer activity;cytokine receptor activity	cellular_component;membrane;cell;intrinsic component of membrane;membrane part;cell part;cell periphery;plasma membrane;integral component of membrane	-	-	1.44	0.2	0.38	0.05	0.13	0.02	0.28	0.1	0.06	0.07	0.01	0.07
TR11047_c0_g1	probable plastid-lipid-associated protein 4, chloroplastic isoform X1 [Prunus persica]|ONI36045.1 hypothetical protein PRUPE_1G566700 [Prunus persica]	Probable plastid-lipid-associated protein 4, chloroplastic OS=Arabidopsis thaliana OX=3702 GN=PAP4 PE=1 SV=1	PAP_fibrillin	-	-	-	-	-	6.14	6.82	8.1	3.7	3.85	2.84	1.66	2.07	1.52	2.73	1.91	1.75
TR11052_c0_g1	integral membrane protein 2B [Rattus norvegicus]|Q5XIE8.1 RecName: Full=Integral membrane protein 2B	-	BRICHOS domain	multicellular organism development;biological_process;multicellular organismal process;developmental process;system development;anatomical structure development;metabolic process;nitrogen compound metabolic process;biosynthetic process;macromolecule biosynthetic process;glycoprotein metabolic process;glycoprotein biosynthetic process;regulation of biosynthetic process;negative regulation of biosy…	molecular_function;binding;amide binding;peptide binding;nucleotide binding;drug binding;purine nucleotide binding;adenyl nucleotide binding;ribonucleotide binding;purine ribonucleotide binding;adenyl ribonucleotide binding;purine ribonucleoside triphosphate binding;small molecule binding;ion binding;anion binding;organic cyclic compound binding;carbohydrate derivative binding;nucleoside phosphat…	intracellular;cellular_component;integral component of membrane;membrane;extracellular region;extracellular space;cell;cytoplasm;endosome;intracellular membrane-bounded organelle;Golgi apparatus;Golgi-associated vesicle;endomembrane system;organelle membrane;intrinsic component of membrane;intrinsic component of organelle membrane;cytoplasmic vesicle;vesicle;organelle subcompartment;organelle;mem…	-	-	3.49	1.16	1.65	0.22	0.17	0.24	0.56	0.74	0.4	0.21	0.19	0.09
TR11055_c0_g1	non-classical arabinogalactan protein 31 [Quercus suber]	-	Pollen proteins Ole e I like	-	-	-	-	-	5.51	4.61	3.72	4.1	6.81	5.87	18.29	21.42	21.06	6.82	6.17	6.6
TR11065_c0_g2	PREDICTED: uncharacterized protein LOC100253569 isoform X1 [Vitis vinifera]|CBI15047.3 unnamed protein product, partial [Vitis vinifera]	Transcription factor bHLH167 OS=Arabidopsis thaliana OX=3702 GN=BHLH167 PE=2 SV=1	Helix-loop-helix DNA-binding domain	-	-	-	-	-	1.57	2.23	1.99	1.18	1.92	1.77	0.29	0.24	0.15	0	0.05	0.2
TR11065_c0_g4	transcription factor bHLH162-like [Hevea brasiliensis]	Transcription factor bHLH162 OS=Arabidopsis thaliana OX=3702 GN=BHLH162 PE=1 SV=1	Helix-loop-helix DNA-binding domain	-	-	-	-	-	0.9	0.64	0.9	0.16	0.57	0.37	1.56	1.97	1.38	1	1.18	1.01
TR1107_c0_g1	unnamed protein product [Brassica rapa]|VDD25486.1 unnamed protein product [Brassica rapa]|VDD65329.1 unnamed protein product [Brassica oleracea]|VDD65740.1 unnamed protein product [Brassica oleracea]	Uncharacterized protein ycf68 OS=Eucalyptus globulus subsp. globulus OX=71271 GN=ycf68-1 PE=3 SV=1	-	-	-	-	-	-	512.16	425.94	313.7	174.15	189.31	210.7	126.89	114.63	154.12	65.29	62.27	82.97
TR1107_c12_g1	Hypothetical protein PFR_JS20-1_820 [Propionibacterium freudenreichii]|SCQ80873.1 Hypothetical protein PFR_JS20-2_824 [Propionibacterium freudenreichii]	-	-	-	-	-	-	-	2.76	4.96	12.97	1.09	1.76	0.7	2.1	0.75	0.87	0.63	0.59	0
TR1107_c2_g1	hypothetical protein [uncultured bacterium]	-	-	-	-	-	-	-	7.6	8.63	6.46	1.65	3.05	2.19	8.18	0.88	7.09	2.74	2.44	3.21
TR1107_c20_g2	hypothetical protein GTCCBUS3UF5_250 [Geobacillus thermoleovorans CCB_US3_UF5]	-	-	-	-	-	-	-	18.77	2.19	1.38	0	0.31	0	0.34	0	0.33	0	0.57	0
TR11078_c0_g1	trihelix transcription factor ASIL1-like [Hevea brasiliensis]	Trihelix transcription factor ASIL2 OS=Arabidopsis thaliana OX=3702 GN=ASIL2 PE=1 SV=1	Myb/SANT-like DNA-binding domain	-	-	-	-	-	116.62	115.76	125.77	410.59	389.92	406.53	150.48	152.93	153.05	434.34	415.18	401.33
TR11079_c0_g1	hypothetical protein A3E01_08265 [Gammaproteobacteria bacterium RIFCSPHIGHO2_12_FULL_63_22]	-	-	-	-	-	-	-	0.74	0.5	0.66	0.2	0.27	0.26	0.76	0.29	0.25	0.12	0.1	0.11
TR1108_c1_g1	Acetate/butyrate--CoA ligase AAE7, peroxisomal like [Actinidia chinensis var. chinensis]	Acetate/butyrate--CoA ligase AAE7, peroxisomal OS=Arabidopsis thaliana OX=3702 GN=AAE7 PE=1 SV=1	AMP-binding enzyme;AMP-binding enzyme C-terminal domain	-	-	-	-	-	46.14	47.4	49.46	40.21	40.03	41.29	62.98	59.92	59.94	159.86	161.07	157.47
TR1108_c4_g1	D-galactoside/L-rhamnose binding SUEL lectin domain [Macleaya cordata]	Beta-galactosidase OS=Solanum lycopersicum OX=4081 PE=1 SV=1	Glycosyl hydrolases family 35;Beta-galactosidase;Galactose binding lectin domain	-	-	-	-	-	21.71	24.48	23.97	45.86	45.31	45.94	171.3	166.41	164.73	509.91	493.67	504.08
TR1108_c5_g2	PREDICTED: transcription factor TCP7-like [Nelumbo nucifera]	Transcription factor TCP7 OS=Arabidopsis thaliana OX=3702 GN=TCP7 PE=1 SV=1	TCP family transcription factor	-	-	-	-	-	6.96	7.21	7.67	14.68	16.65	16.55	11.44	13.13	11.93	18.89	20.96	19.2
TR110809_c2_g1	Glycoside hydrolase [Macleaya cordata]	Probable xyloglucan endotransglucosylase/hydrolase protein 32 OS=Arabidopsis thaliana OX=3702 GN=XTH32 PE=2 SV=1	-	-	-	-	-	-	2.56	0	2.31	2.38	5.01	5.94	124.03	155.26	119.42	1.48	3.2	4.21
TR11084_c0_g1	FAD linked oxidase [Macleaya cordata]	L-gulonolactone oxidase 3 OS=Arabidopsis thaliana OX=3702 GN=GULLO3 PE=1 SV=1	D-arabinono-1,4-lactone oxidase;FAD binding domain	-	-	-	-	-	0.3	0.22	0.3	0.31	0.6	0.37	0.2	0.2	0.16	0.73	0.78	0.55
TR11085_c0_g1	PREDICTED: pectinesterase 2-like [Nelumbo nucifera]	Probable pectinesterase/pectinesterase inhibitor 17 OS=Arabidopsis thaliana OX=3702 GN=PME17 PE=2 SV=2	Pectinesterase;Plant invertase/pectin methylesterase inhibitor	-	-	-	K01051|E3.1.1.11; pectinesterase [EC:3.1.1.11]	ko00040(Metabolism);ko01100(Metabolism);ko02020(Environmental Information Processing)	0.28	0.57	0.72	0.19	0.21	0.27	0.93	1.26	1.36	0.2	0.19	0.13
TR11085_c0_g2	PREDICTED: pectinesterase 2 [Juglans regia]	Probable pectinesterase/pectinesterase inhibitor 17 OS=Arabidopsis thaliana OX=3702 GN=PME17 PE=2 SV=2	-	-	-	-	-	-	8.67	11.91	6.39	4.46	0.9	6.47	43.71	39.24	39.47	0	1.95	0.14
TR11088_c0_g1	hypothetical protein AQUCO_00300671v1 [Aquilegia coerulea]	Probable pectinesterase/pectinesterase inhibitor 20 OS=Arabidopsis thaliana OX=3702 GN=PME20 PE=2 SV=2	-	-	-	-	-	-	40.66	34.34	43.78	47.37	50.4	39.73	24.29	31.26	42.04	1.29	4.96	2.53
TR11089_c0_g1	-	-	-	-	-	-	-	-	0.63	0.83	1.23	1.08	0.48	0.8	1.81	1.33	1.5	0.17	0.38	0.17
TR11096_c0_g1	PREDICTED: pentatricopeptide repeat-containing protein At2g01390 isoform X1 [Vitis vinifera]|XP_019075033.1 PREDICTED: pentatricopeptide repeat-containing protein At2g01390 isoform X1 [Vitis vinifera]	Pentatricopeptide repeat-containing protein At2g01390 OS=Arabidopsis thaliana OX=3702 GN=At2g01390/At2g01380 PE=2 SV=2	PPR repeat family;PPR repeat;Pentatricopeptide repeat domain;PPR repeat;Pentacotripeptide-repeat region of PRORP;Domain of unknown function (DUF3368)	-	-	-	-	-	0.59	0.56	0.52	1.36	1.34	1.03	0.66	0.78	0.67	1.34	1.45	0.86
TR1110_c1_g1	uncharacterized protein LOC113294010 [Papaver somniferum]	-	-	-	-	-	-	-	0.83	0.47	0.85	2.33	1.86	2.32	1.32	1.6	1.74	0.96	1.21	0.6
TR111001_c0_g1	mKIAA0844 protein, partial [Mus musculus]	-	-	mitotic cell cycle;cytokinesis;cell cycle;biological_process;cellular process;cell cycle process;cell division;cytoskeleton-dependent cytokinesis;mitotic cell cycle process;protein localization;protein-containing complex localization;macromolecule localization;cellular protein localization;cellular protein-containing complex localization;localization;cellular localization;cellular macromolecule l…	protein binding;molecular_function;binding;protein dimerization activity;identical protein binding;protein homodimerization activity	intracellular;cellular_component;cell;cytoplasm;microtubule organizing center;cytoskeleton;microtubule cytoskeleton;protein-containing complex;organelle;non-membrane-bounded organelle;intracellular organelle;intracellular non-membrane-bounded organelle;organelle part;intracellular part;cytoskeletal part;cytoplasmic part;intracellular organelle part;microtubule organizing center part;cell part;gam…	-	-	0.82	0.27	0.37	0.06	0.03	0.06	0.31	0.07	0	0.11	0.03	0.04
TR11105_c0_g1	hypothetical protein AQUCO_01300571v1 [Aquilegia coerulea]	Probable calcium-binding protein CML25 OS=Arabidopsis thaliana OX=3702 GN=CML25 PE=2 SV=1	EF hand;EF hand;EF-hand domain;EF-hand domain pair;EF-hand domain pair;Secreted protein acidic and rich in cysteine Ca binding region	-	-	-	-	-	4.11	4.4	4.27	0.53	0.39	0.48	0.27	0.73	1.07	0.33	0.16	0.11
TR1111_c2_g1	-	-	-	-	-	-	-	-	45.87	44.56	37.69	49.09	50.94	44.29	9.99	13.4	13.33	2.87	1.74	2.08
TR11113_c0_g1	Hydrophobic protein LTI6A, partial [Mucuna pruriens]	Hydrophobic protein LTI6A OS=Oryza sativa subsp. japonica OX=39947 GN=LTI6A PE=2 SV=1	-	-	-	-	-	-	45.7	46.13	42.85	42.3	42.11	41.5	82.69	97.38	95.17	225.56	246.53	223.79
TR11114_c0_g1	Myc-type [Macleaya cordata]	Transcription factor BIM1 OS=Arabidopsis thaliana OX=3702 GN=BIM1 PE=1 SV=2	Helix-loop-helix DNA-binding domain	-	-	-	-	-	4.06	3.85	3.92	4.92	4.42	3.96	2.36	2.59	2.84	5.06	4.34	5.09
TR11115_c0_g1	pigment epithelium-derived factor precursor [Rattus norvegicus]|AAO60104.1 alpha-2 antiplasmin [Rattus norvegicus]|AAH78686.1 Serine (or cysteine) peptidase inhibitor, clade F, member 1 [Rattus norvegicus]|EDM05209.1 serine (or cysteine) peptidase inhibitor, clade F, member 1, isoform CRA_c [Rattus norvegicus]	Serpin-Z3 OS=Arabidopsis thaliana OX=3702 GN=At2g26390 PE=3 SV=1	Serpin (serine protease inhibitor)	urogenital system development;multicellular organism development;biological_process;multicellular organismal process;developmental process;animal organ development;system development;anatomical structure development;renal system development;system process;nervous system process;behavior;learning or memory;memory;cognition;response to pH;response to abiotic stimulus;response to stimulus;ameboidal-…	molecular_function;enzyme inhibitor activity;endopeptidase inhibitor activity;endopeptidase regulator activity;molecular function regulator;peptidase inhibitor activity;enzyme regulator activity;peptidase regulator activity;serine-type endopeptidase inhibitor activity	intracellular;cellular_component;extracellular region;extracellular space;cell;cytoplasm;neuron projection;axon;extracellular matrix;vesicle;axon part;somatodendritic compartment;cell projection;neuronal cell body;organelle;membrane-bounded organelle;extracellular organelle;cell body;extracellular region part;intracellular part;cytoplasmic part;cell projection part;cell part;collagen-containing e…	-	-	1.35	0.43	0.81	0.06	0.13	0.18	0.18	0.32	0.32	0	0.03	0.16
TR11117_c0_g1	Uncharacterized protein TCM_004539 [Theobroma cacao]	-	-	-	-	-	-	-	0.94	0.47	0.22	3.02	3.27	2.72	2.31	2.55	2.14	5.01	4.07	5.29
TR1112_c0_g1	PREDICTED: NEDD8 ultimate buster 1 [Nelumbo nucifera]	-	UBA/TS-N domain	-	-	-	-	-	12.23	13.67	13.19	16.7	15.71	16.81	13.98	13.49	12.95	24.68	23.94	24.89
TR11120_c0_g1	hypothetical protein AQUCO_00100256v1 [Aquilegia coerulea]|PIA64670.1 hypothetical protein AQUCO_00100256v1 [Aquilegia coerulea]	Tryptophan--tRNA ligase, chloroplastic/mitochondrial OS=Arabidopsis thaliana OX=3702 GN=OVA4 PE=1 SV=1	tRNA synthetases class I (W and Y);tRNA synthetases class I (W and Y)	-	-	-	-	-	2.12	1.88	2.19	1.81	1.3	1.56	3.92	3.75	4.06	3.31	3.16	3.61
TR11138_c0_g1	Glycoside hydrolase [Macleaya cordata]	Polygalacturonase OS=Actinidia deliciosa OX=3627 PE=2 SV=1	Glycosyl hydrolases family 28;Pectate lyase superfamily protein;Glycosyl hydrolases family 28	-	-	-	-	-	0.99	1.32	1.22	0.97	1.33	1.13	14.01	14.63	15.2	10.41	10.34	11.01
TR11138_c0_g2	ABC transporter G family member 25 [Manihot esculenta]|OAY58609.1 hypothetical protein MANES_02G192400 [Manihot esculenta]	ABC transporter G family member 25 OS=Arabidopsis thaliana OX=3702 GN=ABCG25 PE=2 SV=1	ABC-2 type transporter;ABC transporter;ABC-2 family transporter protein	-	-	-	-	-	0.44	0.54	0.3	0.34	0.47	0.26	1.23	0.89	1.06	0.49	0.48	0.33
TR1114_c1_g1	hypothetical protein BVC80_1117g79 [Macleaya cordata]	F-box protein At2g16365 OS=Arabidopsis thaliana OX=3702 GN=At2g16365 PE=2 SV=2	-	-	-	-	-	-	18.84	19.29	18.61	17.77	19.43	18.58	17.66	18.05	16.81	34.05	33.61	33.17
TR1114_c1_g3	PREDICTED: B3 domain-containing protein Os03g0120900-like [Nelumbo nucifera]	B3 domain-containing protein Os02g0683500 OS=Oryza sativa subsp. japonica OX=39947 GN=Os02g0683500 PE=2 SV=1	B3 DNA binding domain	-	-	-	-	-	13.56	13.67	11.32	26.24	25.17	27.68	22.59	21.33	19.76	26.98	27.09	27.92
TR1114_c2_g4	putative lipase ROG1 [Ricinus communis]	-	-	-	-	-	-	-	4.64	5.18	4.98	1.9	1.98	2.01	2	2.57	2.84	0.63	0.6	0.77
TR11141_c0_g1	-	-	-	-	-	-	-	-	0.27	0.35	0.46	0.75	0.71	0.66	1.52	1.6	2.1	1.2	0.72	0.83
TR11144_c0_g1	PREDICTED: GATA transcription factor 16-like [Nelumbo nucifera]	GATA transcription factor 15 OS=Arabidopsis thaliana OX=3702 GN=GATA15 PE=2 SV=2	-	-	-	-	-	-	1.44	2.67	2.73	1.17	1.9	1.68	2.13	2.36	2.99	0.48	0.75	0.76
TR11145_c0_g1	hypothetical protein COLO4_35162 [Corchorus olitorius]	36.4 kDa proline-rich protein OS=Solanum lycopersicum OX=4081 GN=TPRP-F1 PE=2 SV=1	-	-	-	-	-	-	3.49	4.12	3.35	7.4	8.89	7.8	16.06	19.15	19.65	20.63	25.55	27.22
TR1115_c2_g1	-	-	-	-	-	-	-	-	55.1	54.91	56.56	26.77	28.28	25.42	19.86	21.7	23.29	7.51	6.55	8.43
TR11154_c0_g1	-	-	-	-	-	-	-	-	3.11	3.06	2.53	0.39	0.45	0.54	0.39	0.64	0.57	0.68	0.32	0.87
TR11154_c0_g3	Transposon Ty3-G Gag-Pol polyprotein [Vitis vinifera]	-	-	-	-	-	-	-	0.7	0.26	0.24	1.15	1.27	1.48	2.89	2.52	2.71	2.9	2.76	3.05
TR11159_c0_g1	hypothetical protein AQUCO_05100023v1 [Aquilegia coerulea]	Probable FBD-associated F-box protein At1g32375 OS=Arabidopsis thaliana OX=3702 GN=At1g32375 PE=4 SV=2	F-box domain	-	-	-	-	-	2.34	2.25	3.12	1.26	1.54	1.13	3.08	3.02	2.81	4.72	5.15	5.22
TR1116_c0_g1	hypothetical protein CDL15_Pgr003701 [Punica granatum]|PKI46893.1 hypothetical protein CRG98_032704 [Punica granatum]	-	-	-	-	-	-	-	111.94	111.56	101.04	82.22	82.27	82.2	90.61	94.59	89.82	22.21	22.75	22.56
TR1116_c1_g1	-	-	-	-	-	-	-	-	0.49	0	0.42	1.8	1.79	1.19	1.48	1.46	1.09	0.4	0.33	0.35
TR11160_c0_g1	Leucine-rich repeat [Macleaya cordata]	Coronatine-insensitive protein homolog 1b OS=Oryza sativa subsp. japonica OX=39947 GN=COI1B PE=1 SV=1	-	-	-	-	-	-	0.9	0.66	0.92	1.3	1.32	1.31	0.52	0.64	0.68	0.41	0.41	0.62
TR11161_c1_g2	PREDICTED: early nodulin-like protein 3 [Nelumbo nucifera]	Early nodulin-like protein 3 OS=Arabidopsis thaliana OX=3702 GN=At5g25090 PE=2 SV=2	Plastocyanin-like domain	-	-	-	-	-	2.8	3.47	3.2	0.1	0.66	0.27	3.24	2.76	3.35	0.42	0.49	0.26
TR11162_c0_g1	-	-	-	-	-	-	-	-	1.83	0.78	0.63	13.68	9.47	11.66	2.22	6.61	6.22	5.14	5.62	3.87
TR11164_c0_g1	PREDICTED: serine/threonine-protein kinase 38 [Leptonychotes weddellii]	Probable serine/threonine protein kinase IRE3 OS=Arabidopsis thaliana OX=3702 GN=IRE3 PE=2 SV=1	Protein kinase domain;Protein kinase C terminal domain;Protein tyrosine kinase	-	-	-	-	-	1.76	0.46	0.49	0.11	0.16	0.16	0.36	0.16	0.11	0.1	0.06	0.25
TR11165_c0_g1	hypothetical protein POPTR_005G132300 [Populus trichocarpa]	-	-	-	-	-	-	-	2.61	25.6	130.73	1.18	0.46	1.8	4.58	1.75	3.52	1.24	1.4	66.72
TR11173_c0_g2	autophagy-related protein 8C-like [Hevea brasiliensis]	Autophagy-related protein 8C OS=Oryza sativa subsp. indica OX=39946 GN=ATG8C PE=3 SV=2	-	-	-	-	K08341|GABARAP, ATG8, LC3; GABA(A) receptor-associated protein	ko04068(Environmental Information Processing);ko04136(Cellular Processes);ko04137(Cellular Processes);ko04138(Cellular Processes);ko04139(Cellular Processes);ko04140(Cellular Processes);ko04212(Organismal Systems);ko04621(Organismal Systems);ko04727(Organismal Systems)	33.84	36.12	37.27	36.7	38.85	35.2	41.43	44.9	45.74	77.87	82.55	84.49
TR11174_c0_g1	Inositol oxygenase [Macleaya cordata]	Inositol oxygenase 1 OS=Arabidopsis thaliana OX=3702 GN=MIOX1 PE=2 SV=1	Myo-inositol oxygenase	-	-	-	-	-	0	0	0	0	0	0	1.13	4.38	1.82	0	0	0
TR11179_c0_g1	MADS box transcription factor AP3-3, partial [Sinofranchetia chinensis]	-	-	-	-	-	-	-	8.09	12.85	6.62	1.51	2.29	1.66	0.48	1.04	1.1	0.88	0.84	1.63
TR11186_c0_g1	Cullin [Macleaya cordata]	Cullin-3A OS=Arabidopsis thaliana OX=3702 GN=CUL3A PE=1 SV=1	-	-	-	-	-	-	21.26	9.04	16.38	2.76	2.06	4.6	11.58	12.02	12.88	15.65	9.59	14.13
TR11190_c0_g1	hypothetical protein AQUCO_05300087v1, partial [Aquilegia coerulea]	Cationic amino acid transporter 7, chloroplastic OS=Arabidopsis thaliana OX=3702 GN=CAT7 PE=3 SV=1	Amino acid permease;Amino acid permease;C-terminus of AA_permease	-	-	-	-	-	0.44	0.91	0.81	0.46	0.46	0.35	2.01	1.73	1.33	1.42	1.72	1.83
TR11191_c0_g1	-	-	-	-	-	-	-	-	2.24	2	1.87	0.71	0.74	0.87	0.2	0.41	0.38	0.54	0.19	0.25
TR11196_c0_g1	Glutathione S-transferase [Macleaya cordata]	Protein IN2-1 homolog B OS=Oryza sativa subsp. indica OX=39946 GN=GSTZ5 PE=1 SV=1	Glutathione S-transferase, N-terminal domain;Glutathione S-transferase, N-terminal domain	-	-	-	-	-	413.18	453.61	473.18	532.96	551.47	559.84	843.55	858.07	803.85	2662.16	2524.52	2651.37
TR11197_c0_g1	-	-	-	-	-	-	-	-	0.11	0.34	0.31	1.39	1.44	1.25	1.35	1.56	1.46	3.34	3.81	2.6
TR11198_c0_g1	-	-	-	-	-	-	-	-	11.08	14.63	10.4	0.81	2.91	2.72	1.96	2.46	5.26	1.92	0.88	0.95
TR112_c1_g1	Protein of unknown function DUF506 [Macleaya cordata]	-	PDDEXK-like family of unknown function	-	-	-	-	-	59.8	60.99	62.25	71.45	67.21	68.21	46.95	45.54	47.29	8.4	6.84	8.34
TR1120_c1_g1	-	-	-	-	-	-	-	-	102.39	93.22	89.29	189.06	210.48	185.04	61.92	58.15	57.99	28.28	33.59	30.61
TR1120_c1_g2	-	-	-	-	-	-	-	-	30.28	35.59	31.24	127.43	137.03	130.97	58.64	57.24	61.62	31.79	30.14	27.32
TR1120_c5_g1	hsp70 nucleotide exchange factor fes1 [Quercus suber]	-	-	-	-	-	-	-	26.32	21.98	28.06	5.32	9.36	5.73	4.82	5.43	3.13	7.09	6.92	8.2
TR11201_c2_g1	-	-	-	-	-	-	-	-	0.04	0.04	0.15	0.79	0.66	0.53	0	0.14	0	0.06	0	0.24
TR11205_c0_g1	WEB family protein At4g27595, chloroplastic-like [Papaver somniferum]|RZC89876.1 hypothetical protein C5167_035873 [Papaver somniferum]	-	Weak chloroplast movement under blue light	-	-	-	-	-	0.49	0.37	0.57	0.37	0.62	0.4	1.25	1.1	1.11	1.04	1.21	1.34
TR11213_c0_g1	-	-	-	-	-	-	-	-	0.2	0.12	0.29	0.44	0.26	0.4	2.14	1.57	3.54	3.31	2.13	3.32
TR11215_c0_g1	conserved hypothetical protein [Ricinus communis]	-	-	-	-	-	-	-	8.94	7.62	7.95	2.96	2.42	2.61	9.6	7.9	8.72	11.67	10.52	10.41
TR11216_c2_g1	-	-	-	-	-	-	-	-	0.18	0.09	0	1.12	1.32	0.94	4.24	4.3	4.45	1.82	2.61	2.87
TR11218_c0_g1	-	-	-	-	-	-	-	-	177.62	169.59	141.86	52.69	51.29	49.42	216.08	204.99	210.9	40.96	27.13	32.24
TR1122_c0_g2	L10-interacting MYB domain-containing protein [Glycine max]|XP_006601968.1 L10-interacting MYB domain-containing protein [Glycine max]|KRG97783.1 hypothetical protein GLYMA_18G030600 [Glycine max]|KRG97784.1 hypothetical protein GLYMA_18G030600 [Glycine max]	Cytochrome c OS=Oryza sativa subsp. japonica OX=39947 GN=CC-1 PE=1 SV=1	Myb/SANT-like DNA-binding domain	-	-	-	K13484|TTHL; 5-hydroxyisourate hydrolase / 2-oxo-4-hydroxy-4-carboxy-5-ureidoimidazoline decarboxylase [EC:3.5.2.17 4.1.1.97]	ko00230(Metabolism);ko01100(Metabolism)	2.99	2.68	3.45	5.06	4.64	4.79	2.27	2.72	2.54	2.02	1.85	1.88
TR1122_c1_g2	PREDICTED: uncharacterized protein At4g00950 [Nelumbo nucifera]	-	Protein of unknown function (DUF688)	-	-	-	-	-	5.16	6.09	7.19	3.56	2.94	3.59	2.85	2.94	2.88	5.26	5.82	5.53
TR1122_c1_g3	PREDICTED: homeobox-leucine zipper protein HAT4-like [Nelumbo nucifera]	Homeobox-leucine zipper protein HAT4 OS=Arabidopsis thaliana OX=3702 GN=HAT4 PE=1 SV=1	HD-ZIP protein N terminus;Homeobox domain;Homeobox associated leucine zipper	-	-	-	-	-	1.07	0.59	0.52	1.78	1.8	1.76	2.17	2.21	1.97	1.55	1.41	1.08
TR11221_c0_g1	Leucine-rich repeat [Macleaya cordata]	-	-	-	-	-	-	-	18.37	18.83	26.23	2.29	1.39	0.53	9.82	8.57	9.46	1.86	2.34	3
TR11224_c0_g1	unnamed protein product, partial [Vitis vinifera]	UDP-glycosyltransferase 74C1 OS=Arabidopsis thaliana OX=3702 GN=UGT74C1 PE=2 SV=1	-	-	-	-	-	-	55.57	41.81	35.42	22.9	29.19	12.52	2.91	3.67	4.15	2.73	8.36	0.16
TR11225_c0_g1	PREDICTED: MLO-like protein 3 [Nelumbo nucifera]	MLO-like protein 3 OS=Arabidopsis thaliana OX=3702 GN=MLO3 PE=2 SV=1	Mlo family	-	-	-	-	-	1.22	1.27	1.25	2.44	2.71	2.46	1.78	2.11	2.32	2.76	2.36	2.07
TR11228_c0_g1	hypothetical protein AQUCO_00300124v1 [Aquilegia coerulea]	Transcription factor LUX OS=Arabidopsis thaliana OX=3702 GN=LUX PE=1 SV=1	Myb-like DNA-binding domain	-	-	-	-	-	5.19	5.85	5.07	8.45	8.16	8.74	5.41	5.81	5.68	14.36	12.83	13.51
TR11233_c0_g1	-	-	-	-	-	-	-	-	0.83	0.54	0.58	0.21	0.2	0.22	0.93	0.26	0.23	0.11	0.11	0.1
TR11242_c0_g1	PREDICTED: uncharacterized protein LOC109505137 [Elaeis guineensis]	-	-	-	-	-	-	-	1.51	1.09	1.05	0.25	0.2	0.07	1.53	2.32	1.3	0.09	0.12	0.43
TR112426_c0_g1	-	-	-	-	-	-	-	-	1.3	1.31	2.31	0	0.06	0	0.07	0.03	0	0	0	0
TR11243_c0_g1	hypothetical protein AQUCO_00900341v1 [Aquilegia coerulea]	Polygalacturonase inhibitor 1 OS=Arabidopsis thaliana OX=3702 GN=PGIP1 PE=1 SV=1	-	-	-	-	-	-	67.44	67.15	73.21	38.05	34.73	37.52	76.14	78.92	85.07	43.57	39.54	35.71
TR11245_c0_g1	-	-	-	-	-	-	-	-	58.06	43.55	28.53	13.79	21.06	15.06	48.35	54.81	61.06	15.87	12.43	15.52
TR11248_c0_g1	-	-	-	-	-	-	-	-	635.12	584.29	621.21	435.49	458.34	449.02	206.75	191.54	208.9	86.37	90.74	79.67
TR112537_c0_g1	-	-	-	-	-	-	-	-	1.15	0.42	1.59	0	0	0	0.37	0.12	0.25	0	0.14	0
TR11254_c0_g1	Protein kinase domain [Macleaya cordata]	Calcium-dependent protein kinase 32 OS=Arabidopsis thaliana OX=3702 GN=CPK32 PE=1 SV=1	-	-	-	-	-	-	1.2	1.44	0.87	0.81	0.54	1.44	2.33	3.52	3.42	0	0	0
TR11255_c0_g1	Protein of unknown function DUF1218 [Macleaya cordata]	-	Protein of unknown function (DUF1218)	-	-	-	-	-	6.33	5.9	5.83	2.72	2.76	3.35	3.1	3.75	3.09	1.01	0.83	0.79
TR11257_c1_g1	hypothetical protein BVC80_8969g22 [Macleaya cordata]	Mediator-associated protein 2 OS=Arabidopsis thaliana OX=3702 GN=At5g64680 PE=1 SV=1	-	-	-	-	-	-	15.52	16.51	17.36	15.85	15.8	16.48	12.13	12.34	11.8	22.08	21.9	21.41
TR112576_c0_g1	PREDICTED: ankyrin repeat domain-containing protein 13D isoform X2 [Macaca fascicularis]|XP_015289872.1 PREDICTED: ankyrin repeat domain-containing protein 13D isoform X2 [Macaca fascicularis]|XP_025212475.1 ankyrin repeat domain-containing protein 13D isoform X2 [Theropithecus gelada]	-	GPCR-chaperone	-	-	-	-	-	1.81	0.26	0.4	0	0	0	0	0.1	0	0	0	0
TR11258_c0_g1	PREDICTED: probable plastid-lipid-associated protein 11 [Nelumbo nucifera]|XP_019053522.1 PREDICTED: probable plastid-lipid-associated protein 11 [Nelumbo nucifera]	Probable plastid-lipid-associated protein 11, chloroplastic OS=Arabidopsis thaliana OX=3702 GN=PAP11 PE=2 SV=1	PAP_fibrillin	-	-	-	-	-	1.72	0.89	2.06	0.93	0.81	1.01	0.78	0.9	0.93	2.44	2.95	3.49
TR1126_c0_g2	Protein kinase domain [Macleaya cordata]	G-type lectin S-receptor-like serine/threonine-protein kinase LECRK3 OS=Oryza sativa subsp. indica OX=39946 GN=LECRK3 PE=3 SV=2	Protein kinase domain;Protein tyrosine kinase;D-mannose binding lectin;S-locus glycoprotein domain	-	-	-	-	-	7	8.17	7.54	6.27	7.72	7.36	15.25	16.45	16.73	3.25	2.95	3.25
TR112624_c0_g1	hypothetical protein M569_00222, partial [Genlisea aurea]	-	-	-	-	-	-	-	3.51	1.3	2.2	0.1	0	0	1.08	0.2	0	0.34	0.24	0.33
TR11263_c0_g1	PREDICTED: CO(2)-response secreted protease-like [Nelumbo nucifera]	CO(2)-response secreted protease OS=Arabidopsis thaliana OX=3702 GN=CRSP PE=2 SV=1	Subtilase family;Peptidase inhibitor I9	-	-	-	-	-	2.39	3.29	2.29	0.66	0.55	0.47	2.11	2.23	1.83	1.05	1.03	1.27
TR11265_c0_g1	hypothetical protein Ahy_A08g038967 isoform B [Arachis hypogaea]	-	-	-	-	-	-	-	1.85	3.08	2.93	2.36	2.9	3.21	1.35	1.47	1.26	1.25	0.89	0.48
TR11267_c1_g2	-	-	-	-	-	-	-	-	0	0.2	0.48	2.87	5	3.61	0.73	1.53	1.2	1.19	0.84	0.89
TR11270_c2_g1	PREDICTED: protein ODORANT1-like [Nelumbo nucifera]	Transcription factor MYB20 OS=Arabidopsis thaliana OX=3702 GN=MYB20 PE=2 SV=1	Myb-like DNA-binding domain;Myb-like DNA-binding domain	-	-	-	-	-	3.44	4.39	3.12	4.85	4.65	5.05	7.63	7.5	6.96	0.11	0.31	0.27
TR112716_c0_g1	transcription factor PU.1 [Mus musculus]|P17433.2 RecName: Full=Transcription factor PU.1	-	Ets-domain	-	-	-	-	-	2.09	0.38	0.25	0.09	0	0.06	0.12	0.3	0	0	0.11	0.08
TR11272_c1_g2	-	-	-	-	-	-	-	-	0.46	0.49	0.28	0.92	1.23	0.95	1.4	1.36	2.11	0.49	0.37	0.27
TR11276_c0_g1	Protein kinase domain [Macleaya cordata]	Receptor-like protein kinase OS=Ipomoea nil OX=35883 GN=INRPK1 PE=2 SV=2	Protein kinase domain;Protein tyrosine kinase;Leucine rich repeat;Leucine Rich repeats (2 copies);Leucine Rich Repeat	-	-	-	-	-	0.18	0.17	0.25	0.13	0.13	0.11	0.57	0.67	0.71	0.05	0.1	0.05
TR112778_c1_g1	Glycosyl transferase [Macleaya cordata]	Probable galacturonosyltransferase 11 OS=Arabidopsis thaliana OX=3702 GN=GAUT11 PE=2 SV=1	-	-	-	-	K13648|GAUT; alpha-1,4-galacturonosyltransferase [EC:2.4.1.43]	ko00520(Metabolism);ko01100(Metabolism)	0.17	0.37	0.31	0.49	0.54	0.19	0.06	0.05	0.09	0.03	0.02	0.1
TR11279_c0_g1	Allene oxide synthase 3 [Vitis vinifera]	Allene oxide synthase 3 OS=Solanum lycopersicum OX=4081 GN=AOS3 PE=1 SV=1	Cytochrome P450	-	-	-	K01723|AOS; hydroperoxide dehydratase [EC:4.2.1.92]	ko00592(Metabolism);ko01100(Metabolism);ko01110(Metabolism)	4.03	3.48	4.6	0.16	0.06	0.13	0.26	0.3	0.44	0.04	0.04	0
TR1128_c0_g1	protein of unknown function DUF292 [Macleaya cordata]	Cytochrome f OS=Glycine max OX=3847 GN=petA PE=3 SV=1	Regulator of Vps4 activity in the MVB pathway	-	-	-	K19476|IST1; vacuolar protein sorting-associated protein IST1	ko04144(Cellular Processes)	56.89	57.53	60.87	100.64	96.52	97.92	51.64	52.11	52.98	17.61	16.3	15.01
TR1128_c1_g1	PREDICTED: fasciclin-like arabinogalactan protein 1 [Nelumbo nucifera]	Fasciclin-like arabinogalactan protein 1 OS=Arabidopsis thaliana OX=3702 GN=FLA1 PE=1 SV=1	Fasciclin domain	-	-	-	-	-	0.38	0.8	0.92	0.03	0.17	0.3	1.22	0.99	0.95	0.16	0.15	0.05
TR11280_c1_g1	hypothetical protein AQUCO_00500368v1 [Aquilegia coerulea]	SNF1-related protein kinase regulatory subunit beta-2 OS=Arabidopsis thaliana OX=3702 GN=KINB2 PE=1 SV=1	5'-AMP-activated protein kinase beta subunit, interaction domain;Glycogen recognition site of AMP-activated protein kinase;Glycogen recognition site of AMP-activated protein kinase	-	-	-	K07199|PRKAB; 5'-AMP-activated protein kinase, regulatory beta subunit	ko04068(Environmental Information Processing);ko04152(Environmental Information Processing);ko04211(Organismal Systems);ko04213(Organismal Systems);ko04371(Environmental Information Processing);ko04530(Cellular Processes);ko04710(Organismal Systems);ko04714(Organismal Systems);ko04910(Organismal Systems);ko04920(Organismal Systems);ko04921(Organismal Systems);ko04922(Organismal Systems)	1.62	1.53	1.3	1.69	1.83	1.94	2.6	2.05	2.05	8.13	7.61	7.34
TR11284_c0_g1	rab GDP dissociation inhibitor beta [Macaca mulatta]|XP_003903397.1 rab GDP dissociation inhibitor beta [Papio anubis]|XP_005564626.1 PREDICTED: rab GDP dissociation inhibitor beta isoform X2 [Macaca fascicularis]|XP_010364805.1 PREDICTED: rab GDP dissociation inhibitor beta [Rhinopithecus roxellana]|XP_011830312.1 PREDICTED: rab GDP dissociation inhibitor beta isoform X2 [Mandrillus leucophaeus]…	Guanosine nucleotide diphosphate dissociation inhibitor At5g09550 OS=Arabidopsis thaliana OX=3702 GN=At5g09550 PE=3 SV=1	GDP dissociation inhibitor	metabolic process;biological_process;signal transduction;intracellular signal transduction;cell communication;cellular process;signaling;regulation of biological process;regulation of cellular process;response to stimulus;cellular response to stimulus;biological regulation;protein localization;transport;peptide transport;macromolecule localization;amide transport;establishment of protein localiza…	molecular_function;GDP-dissociation inhibitor activity;molecular function regulator;enzyme regulator activity;GTPase regulator activity;nucleoside-triphosphatase regulator activity;enzyme activator activity;catalytic activity;oxidoreductase activity;GTPase activator activity;Rab GDP-dissociation inhibitor activity	intracellular;cellular_component;extracellular region;extracellular space;cell;cytoplasm;intracellular membrane-bounded organelle;adherens junction;cell-substrate adherens junction;endomembrane system;cell junction;cell-substrate junction;vesicle;organelle;membrane-bounded organelle;intracellular organelle;extracellular organelle;extracellular region part;intracellular part;cytoplasmic part;cell …	-	-	3.35	0.82	0.78	0.33	0.36	0.61	0.86	0.39	0.39	0.3	0.18	0.49
TR11284_c0_g3	PREDICTED: rab GDP dissociation inhibitor alpha [Marmota marmota marmota]	Guanosine nucleotide diphosphate dissociation inhibitor At5g09550 OS=Arabidopsis thaliana OX=3702 GN=At5g09550 PE=3 SV=1	GDP dissociation inhibitor	-	-	-	-	-	2.75	0.64	0.75	0.15	0.05	0.37	0.53	0.53	0.11	0.32	0.19	0.07
TR112902_c0_g1	apolipoprotein A-IV precursor [Rattus norvegicus]|AAA85909.1 apolipoprotein A-IV prepeptide [Rattus norvegicus]	-	Apolipoprotein A1/A4/E domain;YtxH-like protein;Baculovirus polyhedron envelope protein, PEP, C terminus;gp58-like protein;Apolipophorin-III precursor (apoLp-III);Domain of unknown function (DUF4795);Bacterial protein of unknown function (DUF883)	organ or tissue specific immune response;immune system process;mucosal immune response;defense response;response to stress;immune response;biological_process;innate immune response;response to stimulus;metabolic process;alcohol metabolic process;lipid metabolic process;steroid biosynthetic process;steroid metabolic process;cholesterol metabolic process;lipid biosynthetic process;biosynthetic proc…	molecular_function;binding;metal ion binding;ion binding;cation binding;transition metal ion binding;steroid binding;lipid binding;sterol binding;small molecule binding;alcohol binding;organic cyclic compound binding;transporter activity;lipid transporter activity;sterol transporter activity;phospholipid binding;anion binding;quaternary ammonium group binding;ammonium ion binding;protein binding;…	cellular_component;extracellular region;extracellular space;cell;vesicle;protein-containing complex;protein-lipid complex;plasma lipoprotein particle;triglyceride-rich plasma lipoprotein particle;organelle;membrane-bounded organelle;extracellular organelle;extracellular region part;cell part;extracellular vesicle;lipoprotein particle;cell surface;high-density lipoprotein particle;chylomicron;bloo…	-	-	2.96	0.36	0.5	0.1	0.09	0.09	0.45	0.42	0.19	0.11	0.16	0.06
TR112905_c0_g1	PREDICTED: protein TPX2 [Nelumbo nucifera]	-	Targeting protein for Xklp2 (TPX2)	-	-	-	-	-	0	0.06	0	0.1	0	0.14	0.88	0.86	0.77	0.04	0.02	0.13
TR113_c10_g1	hypothetical protein AQUCO_00700665v1 [Aquilegia coerulea]	Transcription factor HEC2 OS=Arabidopsis thaliana OX=3702 GN=HEC2 PE=1 SV=1	Helix-loop-helix DNA-binding domain	-	-	-	-	-	15.14	14.69	11.43	20.38	20.45	20.02	12.21	11.68	11.86	1.96	2.37	1.82
TR113_c11_g1	-	-	-	-	-	-	-	-	0	0	0	0	0	0	9.01	9.34	9.27	2.26	2.82	3.44
TR113_c2_g1	metallothionein-like protein 3 [Nelumbo nucifera]	Metallothionein-like protein type 3 OS=Musa acuminata OX=4641 PE=3 SV=1	-	-	-	-	-	-	297.24	286.86	245.85	216.68	241.85	230.85	245.1	242.57	255.56	435.33	459.54	461.44
TR113_c3_g1	-	-	-	-	-	-	-	-	8.56	8.64	12.13	2.9	3.74	2.24	7.06	5.11	7.01	1.62	0.66	0.46
TR113_c4_g2	PREDICTED: dof zinc finger protein DOF3.1-like [Nelumbo nucifera]	Dof zinc finger protein DOF1.7 OS=Arabidopsis thaliana OX=3702 GN=DOF1.7 PE=2 SV=1	Dof domain, zinc finger	-	-	-	-	-	9.57	9.66	10.95	27.65	26.52	28.51	8.22	10.35	8.71	4.68	4.48	4.54
TR113_c4_g3	hypothetical protein AQUCO_00200949v1 [Aquilegia coerulea]	Dof zinc finger protein 4 OS=Oryza sativa subsp. japonica OX=39947 GN=DOF4 PE=2 SV=1	-	-	-	-	-	-	13.35	12.68	12.24	17.38	15.75	16.78	7.3	7.97	7.48	10.74	10.63	11.59
TR113_c5_g1	-	-	-	-	-	-	-	-	1.91	1.58	1.81	3.08	3.86	2.99	2.5	2.92	2.77	1.3	0.82	0.85
TR113_c6_g1	-	-	-	-	-	-	-	-	0.74	1.01	0.92	5.06	5.82	5.55	1.91	1.74	1.68	1.38	2.14	1.2
TR1130_c4_g1	Glycoside hydrolase [Macleaya cordata]	Beta-glucosidase 47 OS=Arabidopsis thaliana OX=3702 GN=BGLU47 PE=3 SV=2	Glycosyl hydrolase family 1;Glycosyl hydrolase family 1	-	-	-	-	-	95.98	100.95	101.5	495.65	507.13	514.87	852.23	864.63	858.22	1369.76	1319.9	1327.72
TR11303_c0_g1	uncharacterized protein LOC112034846 [Quercus suber]	-	-	-	-	-	-	-	6.01	5.99	9.42	48.98	52.25	52.51	65.83	73.88	75.03	142.47	143.17	129.92
TR11303_c1_g1	tyrosyl-DNA phosphodiesterase 2-like [Papaver somniferum]	-	Endonuclease/Exonuclease/phosphatase family	-	-	-	-	-	10.9	10.67	11.16	3.01	2.69	2.5	7.09	6.85	6.67	2.7	2.52	2.49
TR11309_c0_g1	-	-	-	-	-	-	-	-	0.22	0.16	0.38	1.32	1.26	1.11	0.75	0.81	0.84	0.61	0.7	0.77
TR1131_c0_g1	L10-interacting MYB domain-containing protein-like [Olea europaea var. sylvestris]	-	Myb/SANT-like DNA-binding domain	-	-	-	-	-	14.95	15.25	14.89	6.7	6.72	6.77	5.45	4.97	5.29	3.05	2.99	2.86
TR11315_c0_g1	-	-	-	-	-	-	-	-	3.93	4.29	6.41	0.3	0.63	0.59	0.68	0.78	0.78	2.13	2.05	1.05
TR11318_c0_g1	hypothetical protein AQUCO_02200169v1 [Aquilegia coerulea]	Protein LYK5 OS=Arabidopsis thaliana OX=3702 GN=LYK5 PE=2 SV=1	-	-	-	-	-	-	13.12	14.89	6.3	36.1	36	36.49	30.98	47.34	33.19	73.56	86.65	80.79
TR1132_c0_g1	PREDICTED: BTB/POZ and MATH domain-containing protein 3 isoform X1 [Nelumbo nucifera]|XP_010256805.1 PREDICTED: BTB/POZ and MATH domain-containing protein 3 isoform X1 [Nelumbo nucifera]|XP_019053308.1 PREDICTED: BTB/POZ and MATH domain-containing protein 3 isoform X1 [Nelumbo nucifera]	BTB/POZ and MATH domain-containing protein 3 OS=Arabidopsis thaliana OX=3702 GN=BPM3 PE=1 SV=1	BTB/POZ domain	-	-	-	K10523|SPOP; speckle-type POZ protein	ko04340(Environmental Information Processing);ko04341(Environmental Information Processing)	108.14	111.41	114.28	48.74	50.77	53	51.24	51.54	50.13	31.88	32.58	35.28
TR11330_c0_g1	RING-H2 finger protein ATL2 [Cynara cardunculus var. scolymus]|KVH91705.1 Zinc finger, RING/FYVE/PHD-type [Cynara cardunculus var. scolymus]	Putative RING-H2 finger protein ATL53 OS=Arabidopsis thaliana OX=3702 GN=ATL53 PE=3 SV=2	Ring finger domain;RING-like zinc finger;RING-H2 zinc finger domain;Zinc finger, C3HC4 type (RING finger);RING-type zinc-finger;zinc-RING finger domain;Zinc finger, C3HC4 type (RING finger);Anaphase-promoting complex subunit 11 RING-H2 finger	-	-	-	-	-	1.49	1.89	2.03	0.28	0.14	0.68	0.15	0.21	0.31	0	0.15	0.24
TR11332_c0_g2	exocyst 70 [Nicotiana benthamiana]	Exocyst complex component EXO70A1 OS=Arabidopsis thaliana OX=3702 GN=EXO70A1 PE=1 SV=1	Exo70 exocyst complex subunit	-	-	-	-	-	0.23	0.29	0.14	0.33	0.46	0.4	0.47	0.26	0.35	2.92	2.72	2.56
TR11334_c0_g1	hypothetical protein B456_004G058500 [Gossypium raimondii]	Vesicle-associated membrane protein 725 OS=Arabidopsis thaliana OX=3702 GN=VAMP725 PE=2 SV=2	-	-	-	-	-	-	10.08	9.87	8.81	14.67	15.14	13.31	5.77	5.87	6.06	1.45	2.14	2.06
TR11336_c0_g1	expansin-A8-like protein [Cinnamomum micranthum f. kanehirae]	Expansin-A10 OS=Arabidopsis thaliana OX=3702 GN=EXPA10 PE=2 SV=1	-	-	-	-	-	-	42.36	41.57	42.1	31.74	36.88	33.36	90.2	87.43	93.38	168.85	163.66	174.02
TR11342_c0_g2	PREDICTED: early nodulin-like protein 2 [Vigna angularis]|KOM49332.1 hypothetical protein LR48_Vigan08g015900 [Vigna angularis]|BAT89540.1 hypothetical protein VIGAN_06051600 [Vigna angularis var. angularis]	Early nodulin-like protein 1 OS=Arabidopsis thaliana OX=3702 GN=At2g25060 PE=2 SV=2	-	-	-	-	-	-	235.22	267.94	300.41	475.07	386.89	425	220.47	229.1	209.18	80.19	82.73	73.56
TR11344_c0_g1	S-locus lectin protein kinase family protein, putative [Theobroma cacao]	Putative receptor protein kinase ZmPK1 OS=Zea mays OX=4577 GN=PK1 PE=2 SV=2	Protein kinase domain;Protein tyrosine kinase	-	-	-	-	-	7.05	9.29	7.07	25.75	22.05	24.5	15.8	21.4	12	17.9	14.5	18.14
TR113494_c0_g1	hepatoma-derived growth factor isoform 1 [Mus musculus]|P51859.2 RecName: Full=Hepatoma-derived growth factor	Protein HUA2-LIKE 3 OS=Arabidopsis thaliana OX=3702 GN=HULK3 PE=2 SV=1	PWWP domain	-	-	-	-	-	1.72	0.32	0.29	0.06	0	0.12	0.41	0.08	0.04	0.1	0.12	0.2
TR1135_c1_g1	-	-	-	-	-	-	-	-	3.82	3.17	3.37	2.7	3.2	2.79	2.73	3.36	2.56	6.54	5.99	4.78
TR11353_c0_g1	PREDICTED: glycine-rich RNA-binding protein 1-like isoform X1 [Capsicum annuum]	Glycine-rich RNA-binding protein 7 OS=Arabidopsis thaliana OX=3702 GN=RBG7 PE=1 SV=1	-	-	-	-	-	-	467.77	467.76	431.08	293.49	321.99	316.04	76.5	91.05	84.09	50.04	38.56	46.11
TR11355_c0_g1	-	-	-	-	-	-	-	-	0.05	0.11	0.06	0.65	0.36	0.7	1.04	1.36	0.76	4.38	5.48	3.8
TR11356_c0_g1	-	-	-	-	-	-	-	-	0.78	0.39	1.93	17.88	16.42	23.09	10.86	9.29	18.71	2.42	4.66	8.32
TR11359_c0_g1	-	-	-	-	-	-	-	-	2.44	2.14	2.27	13.95	16.01	14.61	1.47	0.59	1.49	1.56	1.2	1.54
TR1136_c0_g1	hypothetical protein AQUCO_00900172v1 [Aquilegia coerulea]	bZIP transcription factor TGA10 OS=Nicotiana tabacum OX=4097 GN=TGA10 PE=1 SV=1	Seed dormancy control;bZIP transcription factor;Basic region leucine zipper;Seed dormancy control;bZIP transcription factor;Basic region leucine zipper;PLATZ transcription factor	-	-	-	K14431|TGA; transcription factor TGA	ko04075(Environmental Information Processing)	2.21	1.98	2	1.71	1.88	1.95	5.91	5.91	5.83	4.49	4.36	4.02
TR1136_c0_g2	hypothetical protein AQUCO_00900172v1 [Aquilegia coerulea]	bZIP transcription factor TGA10 OS=Nicotiana tabacum OX=4097 GN=TGA10 PE=1 SV=1	Seed dormancy control;bZIP transcription factor;Basic region leucine zipper;Seed dormancy control;bZIP transcription factor;Basic region leucine zipper	-	-	-	K14431|TGA; transcription factor TGA	ko04075(Environmental Information Processing)	0.14	0.09	0.06	0.01	0.02	0.03	1.13	0.78	0.82	0.07	0.16	0.02
TR1136_c0_g3	PREDICTED: uncharacterized protein LOC104586185 [Nelumbo nucifera]	-	PLATZ transcription factor	-	-	-	-	-	7.51	6.36	7.12	13.73	13.66	14.54	12.89	13.17	16.88	22.48	22.32	18.51
TR1136_c4_g1	-	-	-	-	-	-	-	-	0	0.17	0.2	2.83	4.01	1.81	0.41	0.59	0.2	1	0.59	0.99
TR11360_c0_g1	PREDICTED: uncharacterized protein LOC108985068 [Juglans regia]	-	-	-	-	-	-	-	0.05	0.05	0.11	0.04	0	0	7.1	9.29	7.48	0.07	0.23	0.27
TR11360_c0_g2	hypothetical protein BVC80_9079g80 [Macleaya cordata]	-	-	-	-	-	-	-	0.11	0.19	0.26	0	0	0.04	7.79	8.31	7.48	0.05	0.46	0.32
TR11362_c0_g1	-	-	-	-	-	-	-	-	42.47	45.84	40.44	25.17	33.42	24.87	13.37	10.61	13.46	7.82	7.71	9.76
TR11369_c0_g1	hypothetical protein B456_005G195200 [Gossypium raimondii]	Glycerophosphodiester phosphodiesterase GDPD2 OS=Arabidopsis thaliana OX=3702 GN=GDPD2 PE=2 SV=1	-	-	-	-	-	-	2	1.69	1.6	1.64	1.17	1.1	4.31	2.99	4.95	0.45	0.14	0.15
TR11374_c0_g1	hypothetical protein AQUCO_02700256v1 [Aquilegia coerulea]	-	Protein of unknown function (DUF674)	-	-	-	-	-	0.13	0.37	0.12	0.22	0.18	0	0.95	0.98	0.38	0	0	0
TR11382_c0_g1	PREDICTED: uncharacterized protein LOC104593210 [Nelumbo nucifera]	-	-	-	-	-	-	-	10.6	10.26	9.48	16.08	14.46	14.03	15.36	17.51	17.03	34	36.24	34.11
TR11386_c0_g2	calreticulin=63 kda calcium-binding protein [rats, liver, Sprague Dawley, Peptide Partial, 248 aa]	Calreticulin OS=Zea mays OX=4577 GN=CRT PE=2 SV=1	Calreticulin family	-	-	-	-	-	6.03	1.09	1.49	0.55	0.28	0.22	1.11	1.03	0.61	0.18	0.13	0.09
TR11397_c0_g1	-	-	-	-	-	-	-	-	0.64	0.45	0.69	0.52	0.34	0.27	0.05	0.05	0.06	0	0	0.03
TR113974_c0_g1	-	-	-	-	-	-	-	-	428.89	447.21	568.41	421.86	410.24	413.8	220.22	199.44	199.25	212.76	201.88	174.42
TR11398_c0_g1	glu S.griseus protease inhibitor-like [Quercus suber]	Inhibitor of trypsin and hageman factor OS=Cucurbita maxima OX=3661 PE=1 SV=1	-	-	-	-	-	-	35.43	28.02	29.44	25.11	20.63	16.74	62.15	54.16	63.62	50.74	58	43.54
TR11399_c0_g1	hypothetical protein GALMADRAFT_82091, partial [Galerina marginata CBS 339.88]	-	-	-	-	-	-	-	72.19	17.64	72.33	2.06	3.21	6.15	15.41	0.66	9.36	2.08	6.99	1.71
TR1140_c1_g1	-	Protein disulfide isomerase-like 1-1 OS=Arabidopsis thaliana OX=3702 GN=PDIL1-1 PE=1 SV=1	-	-	-	-	-	-	0.51	0.58	0.4	1.93	1.48	1.09	1.73	1.4	1.35	2.45	2.1	1.65
TR11400_c0_g1	PREDICTED: cytochrome P450 71A9-like [Nelumbo nucifera]|XP_010246210.1 PREDICTED: cytochrome P450 71A9-like [Nelumbo nucifera]	Cytochrome P450 71A9 OS=Glycine max OX=3847 GN=CYP71A9 PE=2 SV=1	Cytochrome P450	-	-	-	-	-	3.96	4.07	4.52	0.1	0.07	0.07	0.33	0.3	0.23	0.18	0.11	0.05
TR11405_c0_g2	-	-	-	-	-	-	-	-	1867.02	1840.29	1939.96	1570.31	1460.03	1498.3	1757.07	1920.29	1934.13	737.23	753.91	731.8
TR11408_c0_g1	PREDICTED: serine carboxypeptidase-like 19 [Tarenaya hassleriana]	Serine carboxypeptidase-like 6 OS=Arabidopsis thaliana OX=3702 GN=SCPL6 PE=2 SV=2	-	-	-	-	-	-	0.46	0.69	0.28	1.93	2.07	1.94	3.35	2.16	0.27	20.54	17.51	19.39
TR11423_c0_g1	PREDICTED: L-cysteine desulfhydrase-like [Nelumbo nucifera]|XP_010271035.1 PREDICTED: L-cysteine desulfhydrase-like [Nelumbo nucifera]	L-cysteine desulfhydrase OS=Arabidopsis thaliana OX=3702 GN=LCD PE=2 SV=1	Aminotransferase class-V	-	-	-	-	-	0.7	1.77	1.68	1.17	1.59	1.25	0.42	1.02	1.05	4.92	4.87	5.17
TR11435_c0_g1	PREDICTED: probable carboxylesterase 2 [Nelumbo nucifera]	Probable carboxylesterase 2 OS=Arabidopsis thaliana OX=3702 GN=CXE2 PE=2 SV=1	alpha/beta hydrolase fold;Carboxylesterase family	-	-	-	-	-	41.51	43.45	41.05	30.94	29.48	31.02	35.2	36.19	34.51	5.69	5.53	6.35
TR114367_c0_g1	hypothetical protein BACCAP_04474 [Pseudoflavonifractor capillosus ATCC 29799]|EDM98346.1 hypothetical protein BACCAP_03832 [Pseudoflavonifractor capillosus ATCC 29799]	-	-	-	-	-	-	-	129.06	111.27	88.16	34.05	60.78	53.11	90.03	34.07	57.25	56.56	14.65	35.29
TR114396_c0_g1	Protein kinase domain-containing protein [Cinnamomum micranthum f. kanehirae]	Serine/threonine-protein kinase SAPK3 OS=Oryza sativa subsp. japonica OX=39947 GN=SAPK3 PE=1 SV=1	-	-	-	-	-	-	43.04	62.09	55.21	37.85	46.8	42.13	35.95	40.17	37.67	61.39	87.17	73.2
TR11448_c0_g1	PREDICTED: protein vip1-like [Nelumbo nucifera]	-	RNA recognition motif. (a.k.a. RRM, RBD, or RNP domain)	-	-	-	-	-	0.19	0.38	0.07	0.1	0.28	0.07	0.8	1.12	1.35	0.54	0.56	0.63
TR11456_c0_g1	Pentatricopeptide repeat [Macleaya cordata]	Pentatricopeptide repeat-containing protein At1g74630 OS=Arabidopsis thaliana OX=3702 GN=PCMP-H71 PE=2 SV=1	PPR repeat;PPR repeat family;PPR repeat;Pentatricopeptide repeat domain;Pentacotripeptide-repeat region of PRORP	-	-	-	-	-	0.42	0.61	0.7	0.79	0.63	0.52	0.57	0.59	0.75	2.15	2.46	2.22
TR11457_c0_g1	PREDICTED: myb-related protein B-like [Nelumbo nucifera]	Transcription factor MYB101 OS=Arabidopsis thaliana OX=3702 GN=MYB101 PE=2 SV=1	Myb-like DNA-binding domain;Myb-like DNA-binding domain	-	-	-	-	-	1.46	1.7	2.02	0.96	0.56	1.12	1.87	2.1	2.15	0.44	0.42	0.28
TR11458_c0_g1	PREDICTED: uncharacterized protein LOC104596864 [Nelumbo nucifera]	-	Ankyrin repeats (3 copies);Ankyrin repeat;Ankyrin repeats (many copies);Ankyrin repeats (many copies);Domain of unknown function	-	-	-	-	-	0.54	0.48	0.38	0.12	0.17	0.17	0.66	0.35	0.21	1.44	1.35	1.45
TR11459_c0_g1	PREDICTED: anthranilate N-benzoyltransferase protein 1 [Nelumbo nucifera]	Omega-hydroxypalmitate O-feruloyl transferase OS=Arabidopsis thaliana OX=3702 GN=HHT1 PE=1 SV=1	Transferase family	-	-	-	-	-	10.32	11.01	9.93	3.51	3.55	3.81	15.39	14.7	16.52	6.28	5.86	6.71
TR11460_c0_g1	Myc-type [Macleaya cordata]	Transcription factor bHLH84 OS=Arabidopsis thaliana OX=3702 GN=BHLH84 PE=1 SV=1	Helix-loop-helix DNA-binding domain	-	-	-	-	-	1.32	1.27	1.38	0.62	0.43	0.69	0.84	0.77	0.92	2.07	2.65	3.01
TR11461_c0_g1	PREDICTED: pyridoxal reductase, chloroplastic [Nelumbo nucifera]	Pyridoxal reductase, chloroplastic OS=Arabidopsis thaliana OX=3702 GN=PLR1 PE=1 SV=1	Aldo/keto reductase family	-	-	-	K05275|E1.1.1.65; pyridoxine 4-dehydrogenase [EC:1.1.1.65]	ko00750(Metabolism);ko01100(Metabolism);ko01120(Metabolism)	2.24	1.6	1.72	1.42	1.94	1.47	0.17	0.38	0.45	0.43	0.7	0.92
TR11467_c1_g1	hypothetical protein C1645_847772, partial [Glomus cerebriforme]	-	-	-	-	-	-	-	655.97	821.34	753.56	610.21	784.27	841.55	473.86	407.61	332.28	435.31	396.26	1634.34
TR1147_c0_g1	Rab-GTPase-TBC domain [Macleaya cordata]	-	-	-	-	-	-	-	5.62	5.14	5.62	6.73	6.6	5.91	8.58	8.57	9.06	2.35	2.04	2.6
TR11470_c0_g1	PREDICTED: esterase-like isoform X1 [Nelumbo nucifera]	Esterase OS=Hevea brasiliensis OX=3981 PE=1 SV=1	GDSL-like Lipase/Acylhydrolase	-	-	-	-	-	5.29	5.24	5.8	0.09	0.08	0.17	0.3	0.57	0.53	0.31	0.58	0.26
TR11473_c0_g1	hypothetical protein EGK_01490 [Macaca mulatta]	-	Calponin homology (CH) domain;Calponin family repeat	tissue development;biological_process;cellular process;cell differentiation;developmental process;anatomical structure development;cellular developmental process;epithelium development;epithelial cell differentiation	molecular_function;binding;protein binding	cellular_component;extracellular region;extracellular space;vesicle;organelle;membrane-bounded organelle;extracellular organelle;extracellular region part;extracellular vesicle;extracellular exosome	-	-	7.96	2.48	2.4	1	0.58	1.49	2.42	0.97	0.62	0.68	0.27	0.68
TR11483_c0_g2	-	-	-	-	-	-	-	-	0.62	0.19	0.29	1.83	1.6	1.72	1.57	1.53	1.85	1.07	1.19	0.98
TR11485_c0_g1	PREDICTED: receptor-like protein 12 [Gossypium hirsutum]	-	Leucine rich repeat;Leucine Rich repeats (2 copies)	-	-	-	-	-	1.06	1.18	1.94	4.74	4.75	4.52	6.08	8.35	7.3	4.59	2.91	3.22
TR11488_c0_g1	Disease resistance protein [Macleaya cordata]	Probable disease resistance protein At5g04720 OS=Arabidopsis thaliana OX=3702 GN=At5g04720 PE=2 SV=1	NB-ARC domain	-	-	-	-	-	1.51	3.03	0.91	0.85	0.85	1.22	6.16	6.99	5.87	1.13	1.4	1.13
TR11489_c0_g1	NBS-LRR disease resistance protein NBS50 [Cinnamomum micranthum f. kanehirae]	-	-	-	-	-	-	-	0.24	0.39	0.14	1.36	1.89	2.5	2.9	2.87	3.08	0	0.18	0.12
TR11499_c2_g1	Exostosin-like [Macleaya cordata]	Probable glucuronoxylan glucuronosyltransferase F8H OS=Arabidopsis thaliana OX=3702 GN=F8H PE=2 SV=1	Exostosin family	-	-	-	-	-	2.11	2.21	2.12	2.77	3.54	3.6	1.48	1.29	1.33	5.67	5.21	5.59
TR11499_c2_g2	Exostosin-like [Macleaya cordata]	Probable glucuronoxylan glucuronosyltransferase F8H OS=Arabidopsis thaliana OX=3702 GN=F8H PE=2 SV=1	Exostosin family	-	-	-	-	-	0.34	0.29	0.33	0.79	0.64	0.62	0.57	0.61	0.44	5.03	5.37	4.39
TR11501_c0_g1	hypothetical protein A6R68_18732, partial [Neotoma lepida]	Elongation factor 1-alpha OS=Oryza sativa subsp. japonica OX=39947 GN=REFA1 PE=2 SV=2	Elongation factor Tu GTP binding domain;Elongation factor Tu C-terminal domain;Elongation factor Tu domain 2	-	-	-	K03231|EEF1A; elongation factor 1-alpha	ko03013(Genetic Information Processing)	2.96	0.79	0.81	0.16	0.16	0.1	0.83	0.21	0.1	0.29	0.04	0.12
TR115025_c0_g1	-	-	-	-	-	-	-	-	1.6	0.81	0	1.05	0.92	0	17.57	31.92	8.77	0	1.15	0
TR115076_c0_g1	PREDICTED: titin isoform X2 [Rattus norvegicus]	-	Immunoglobulin I-set domain;Immunoglobulin domain;Immunoglobulin domain;Immunoglobulin domain;Immunoglobulin V-set domain;CD80-like C2-set immunoglobulin domain;Natural killer cell receptor 2B4;Immunoglobulin C1-set domain;Ig-like domain on T-cell surface glycoprotein CD3 epsilon chain	-	-	-	-	-	0.78	0.74	0.64	0.15	0.08	0.26	0.56	0.54	0.52	0.1	0.14	0.04
TR11518_c0_g1	Protein like [Actinidia chinensis var. chinensis]	Probable protein phosphatase 2C 28 OS=Oryza sativa subsp. japonica OX=39947 GN=Os03g0137200 PE=2 SV=1	-	-	-	-	-	-	14.78	16.21	13.03	31.99	33.87	30.98	31.58	31.7	33.45	37.34	38.27	35.6
TR11522_c0_g2	unnamed protein product [Mus musculus]|BAE31978.1 unnamed protein product [Mus musculus]|BAE30030.1 unnamed protein product [Mus musculus]|BAE32624.1 unnamed protein product [Mus musculus]|BAE30632.1 unnamed protein product [Mus musculus]|BAE30937.1 unnamed protein product [Mus musculus]|BAE35576.1 unnamed protein product [Mus musculus]|BAE31433.1 unnamed protein product [Mus musculus]|BAE31478.1…	-	Granulin	in utero embryonic development;blastocyst development;multicellular organism development;embryo development;biological_process;embryo development ending in birth or egg hatching;multicellular organismal process;developmental process;hatching;chordate embryonic development;anatomical structure development;organism emergence from protective structure;metabolic process;proteolysis;nitrogen compound …	molecular_function;catalytic activity;endopeptidase activity;serine-type peptidase activity;peptidase activity;peptidase activity, acting on L-amino acid peptides;hydrolase activity;serine hydrolase activity;catalytic activity, acting on a protein;protein binding;signaling receptor binding;binding;molecular function regulator;receptor ligand activity;receptor regulator activity;serine-type endope…	intracellular;cellular_component;extracellular region;extracellular space;cell;cytoplasm;intracellular membrane-bounded organelle;vesicle;organelle;membrane-bounded organelle;intracellular organelle;extracellular organelle;extracellular region part;intracellular part;cytoplasmic part;cell part;extracellular vesicle;extracellular exosome;mitochondrion	-	-	4.84	0.61	0.79	0.23	0.1	0.05	0.48	0.65	0.03	0.07	0.19	0.07
TR11525_c0_g1	-	-	-	-	-	-	-	-	0.32	0.76	1.01	1.68	3.01	2.87	8.34	9.03	10.42	12.26	15.87	13.53
TR11528_c1_g1	EF-hand domain [Macleaya cordata]	Calcium-binding allergen Bet v 3 OS=Betula pendula OX=3505 GN=BETVIII PE=1 SV=1	EF hand;EF-hand domain;EF hand;EF-hand domain pair;EF-hand domain pair	-	-	-	K13448|CML; calcium-binding protein CML	ko04626(Organismal Systems)	215.9	210.13	212.93	158.23	158.37	153.88	161.86	162.97	160.93	37.74	34.97	38.47
TR11530_c0_g1	PREDICTED: IQ domain-containing protein IQM1 [Nelumbo nucifera]|XP_010242251.1 PREDICTED: IQ domain-containing protein IQM1 [Nelumbo nucifera]|XP_010242252.1 PREDICTED: IQ domain-containing protein IQM1 [Nelumbo nucifera]|XP_010242253.1 PREDICTED: IQ domain-containing protein IQM1 [Nelumbo nucifera]	IQ domain-containing protein IQM4 OS=Arabidopsis thaliana OX=3702 GN=IQM4 PE=2 SV=1	-	-	-	-	-	-	6.44	5.73	5.55	2.41	2.33	1.81	1.77	1.7	2.1	1.38	1.48	1.34
TR11533_c0_g1	-	-	-	-	-	-	-	-	0.28	0	0.34	0	0	0	5.2	4.53	4.69	0	0.2	0.42
TR11540_c0_g1	-	-	-	-	-	-	-	-	47.07	45.66	40.2	19.28	13.62	13.99	5.95	6.46	9.48	1.54	1.07	0.76
TR11542_c0_g1	PREDICTED: probable polygalacturonase [Nelumbo nucifera]	-	-	-	-	-	-	-	13.38	14.68	18.76	31.76	28.07	37.03	36	32.41	36.58	19.59	14.82	12.78
TR11549_c0_g1	PREDICTED: guanine nucleotide-binding protein G(s) subunit alpha isoform X1 [Ailuropoda melanoleuca]	-	-	-	-	-	-	-	4.71	1.2	1.5	0.52	0.18	0.18	0.93	0.99	0.67	0.23	0.16	0
TR1155_c1_g1	-	Protein STRUBBELIG-RECEPTOR FAMILY 7 OS=Arabidopsis thaliana OX=3702 GN=SRF7 PE=1 SV=1	-	-	-	-	-	-	0.71	0.83	1.19	0.9	0.93	1.08	1.36	1.78	1.89	0.34	0.24	0.23
TR11553_c1_g1	acyl-CoA 6-desaturase [Rattus norvegicus]|Q9Z122.1 RecName: Full=Acyl-CoA 6-desaturase	Acyl-lipid (9-3)-desaturase OS=Ceratodon purpureus OX=3225 PE=1 SV=1	Fatty acid desaturase;Cytochrome b5-like Heme/Steroid binding domain	metabolic process;biological_process;organic acid metabolic process;lipid metabolic process;fatty acid metabolic process;fatty acid biosynthetic process;lipid biosynthetic process;biosynthetic process;cellular process;organic acid biosynthetic process;carboxylic acid metabolic process;monocarboxylic acid metabolic process;unsaturated fatty acid metabolic process;oxoacid metabolic process;cellular…	molecular_function;catalytic activity;oxidoreductase activity;acyl-CoA desaturase activity;oxidoreductase activity, acting on paired donors, with incorporation or reduction of molecular oxygen;oxidoreductase activity, acting on paired donors, with oxidation of a pair of donors resulting in the reduction of molecular oxygen to two molecules of water;stearoyl-CoA 9-desaturase activity;omega-6 fatty…	intracellular;cellular_component;membrane;cell;cytoplasm;endoplasmic reticulum;intracellular membrane-bounded organelle;endomembrane system;intrinsic component of membrane;organelle subcompartment;nuclear outer membrane-endoplasmic reticulum membrane network;organelle;membrane-bounded organelle;intracellular organelle;organelle part;intracellular part;membrane part;endoplasmic reticulum part;cyto…	-	-	1.77	0.36	0.53	0.1	0.15	0.33	0.57	0.27	0.41	0.05	0.09	0.07
TR11557_c0_g1	hypothetical protein B972_03201 [Brucella abortus F10/05-11]	-	-	-	-	-	-	-	28.39	19.1	6.2	3.51	3.02	5.82	19.13	2.02	9.64	3.68	3.16	3.68
TR1156_c0_g3	Early nodulin 93 ENOD93 protein [Macleaya cordata]	Early nodulin-93 OS=Glycine max OX=3847 PE=2 SV=1	Early nodulin 93 ENOD93 protein	-	-	-	-	-	0.74	1	0.75	0.1	0.66	0.15	73.96	84.38	73.96	0.22	0.12	0.37
TR115670_c0_g1	putative membrane protein [Burkholderia sp. RPE67]|BAO87487.1 putative membrane protein [Burkholderia sp. RPE67]|BAO87598.1 putative membrane protein [Burkholderia sp. RPE67]	-	-	-	-	-	-	-	35.81	27.52	47.52	10.21	14.28	18.01	49.81	11.46	34.64	10.86	5.48	11.27
TR115702_c0_g1	C-type lectin domain family 4 member D isoform 1 [Mus musculus]|Q9Z2H6.1 RecName: Full=C-type lectin domain family 4 member D	-	Lectin C-type domain	immune system process;immune response;biological_process;response to stimulus;cell activation;immune effector process;cell activation involved in immune response;lymphocyte activation involved in immune response;T cell activation involved in immune response;leukocyte activation involved in immune response;immune system development;leukocyte differentiation;multicellular organism development;cellu…	molecular_function;binding;protein binding;signaling receptor binding;immunoglobulin receptor binding;carbohydrate binding	cellular_component;membrane;cell;intrinsic component of membrane;membrane part;cell part;cell periphery;integral component of membrane;plasma membrane	-	-	2.31	0.25	0.15	0.05	0	0	0.07	0.63	0	0.09	0.21	0
TR11572_c1_g1	hypothetical protein G7K_1412-t1 [Saitoella complicata NRRL Y-17804]	-	-	-	-	-	-	-	7.34	2.26	3.42	0.36	0.23	0.49	2.84	0.83	0.73	0.92	0.42	0.3
TR11574_c0_g1	PREDICTED: uncharacterized protein LOC109326163 [Lupinus angustifolius]|OIV98064.1 hypothetical protein TanjilG_09557 [Lupinus angustifolius]	-	-	-	-	-	-	-	9.44	9.68	9.23	3.47	4.17	3.9	3.66	3.19	5.2	11.15	11.82	12.12
TR11576_c0_g1	hypothetical protein JCGZ_21815 [Jatropha curcas]	Proteinase inhibitor OS=Linum usitatissimum OX=4006 PE=1 SV=1	-	-	-	-	-	-	618.41	591.51	584.3	171.03	164.76	182.6	857.65	882.72	876.7	795.6	836.35	815.36
TR11577_c0_g1	-	-	-	-	-	-	-	-	2.36	1.97	2.39	1.02	1.64	1.7	4.76	5.37	10.61	1.3	1.24	1.47
TR115773_c0_g2	-	26S proteasome regulatory subunit 6A homolog OS=Oryza sativa subsp. japonica OX=39947 GN=TBP1 PE=2 SV=2	-	-	-	-	-	-	15	14.02	14.3	31.26	38.36	33	9.67	7.98	8.61	18.66	19.15	17.81
TR11580_c0_g1	Aminotransferase [Macleaya cordata]	1-aminocyclopropane-1-carboxylate synthase OS=Glycine max OX=3847 GN=ACS1 PE=2 SV=1	Aminotransferase class I and II	-	-	-	K01762|ACS; 1-aminocyclopropane-1-carboxylate synthase [EC:4.4.1.14]	ko00270(Metabolism);ko01100(Metabolism);ko01110(Metabolism)	1.19	1.35	1.24	0.44	0.32	0.54	1.82	1.67	1.99	2.26	2.27	2.39
TR11581_c0_g1	PREDICTED: homeobox-leucine zipper protein HOX11 isoform X2 [Nelumbo nucifera]	Homeobox-leucine zipper protein HAT14 OS=Arabidopsis thaliana OX=3702 GN=HAT14 PE=2 SV=3	Homeobox domain;Homeobox associated leucine zipper	-	-	-	-	-	19.11	17.73	20.68	13.67	13.96	14.05	31.91	30.41	31.44	15.5	16.05	15.99
TR1159_c0_g1	uncharacterized protein LOC112027057 isoform X2 [Quercus suber]	D-ribulose kinase OS=Arabidopsis thaliana OX=3702 GN=XK1 PE=1 SV=1	-	-	-	-	-	-	1.45	1.38	1.3	1.73	1.61	1.83	4.76	4.88	4.9	5.72	5.5	5.31
TR11597_c0_g1	Metalloendoproteinase [Actinidia chinensis var. chinensis]	Metalloendoproteinase 3-MMP OS=Arabidopsis thaliana OX=3702 GN=3MMP PE=1 SV=1	Matrixin;Putative peptidoglycan binding domain	-	-	-	-	-	0.53	0.74	0.73	0.79	1.17	0.91	1.04	1.05	0.75	3.02	3.03	3.18
TR11598_c0_g1	-	-	-	-	-	-	-	-	0.05	0.11	0.12	0.84	1.04	0.69	1.37	1.66	1.46	0.38	0.18	0.15
TR1160_c1_g2	-	-	-	-	-	-	-	-	0.57	1.01	0.85	1.31	1.77	1.68	1.02	0.99	1.88	6.89	5.43	9.6
TR1160_c5_g1	Glucan endo-1,3-beta-glucosidase, basic isoform [Vitis vinifera]|RVW92168.1 Glucan endo-1,3-beta-glucosidase, basic isoform [Vitis vinifera]	Glucan endo-1,3-beta-glucosidase, acidic isoform OS=Zea mays OX=4577 PE=2 SV=1	Glycosyl hydrolases family 17	-	-	-	-	-	6.46	5.91	5.24	11.71	12.49	14.2	1.43	3.32	3.09	20.74	19.06	15.01
TR1160_c8_g1	-	Beta-glucosidase 18 OS=Oryza sativa subsp. japonica OX=39947 GN=BGLU18 PE=3 SV=2	-	-	-	-	-	-	6.52	8.21	10.21	175.23	179.05	162.08	187.16	151.38	187.71	91.55	88.06	115.01
TR11600_c0_g1	hypothetical protein AQUCO_00500260v1 [Aquilegia coerulea]	CASP-like protein 2B1 OS=Vitis vinifera OX=29760 GN=GSVIVT00013502001 PE=2 SV=1	Domain of unknown function (DUF588)	-	-	cellular_component;membrane	-	-	1.61	1.42	1.1	1.18	0.96	0.85	3.35	2.95	3.01	2.73	2.63	1.91
TR11601_c0_g2	Drug/metabolite transporter [Macleaya cordata]	Probable plastidic glucose transporter 1 OS=Arabidopsis thaliana OX=3702 GN=At1g05030 PE=2 SV=2	Sugar (and other) transporter;Major Facilitator Superfamily	-	-	-	-	-	2.2	2.39	2.19	2.11	2.04	2.34	2.01	1.86	1.79	3.5	3.4	3.15
TR11604_c0_g2	LEAF RUST 10 DISEASE-RESISTANCE LOCUS RECEPTOR-LIKE PROTEIN KINASE-like 2.1 [Camellia sinensis]	Protein SUPPRESSOR OF NPR1-1 CONSTITUTIVE 4 OS=Arabidopsis thaliana OX=3702 GN=LRK10L-2.6 PE=1 SV=1	Protein kinase domain	-	-	-	-	-	13.14	11.82	10.08	9.49	14.68	13.58	10.85	9.73	11.83	17.92	18.7	20.84
TR116089_c0_g1	hypothetical protein AQUCO_00201317v1 [Aquilegia coerulea]	-	-	-	-	-	-	-	0.32	0.09	0.1	0.22	0.33	0.21	0.1	0.03	0.32	1.28	0.91	1.09
TR11609_c0_g1	PREDICTED: beta-glucosidase 13 [Beta vulgaris subsp. vulgaris]|KMT11220.1 hypothetical protein BVRB_5g110540 [Beta vulgaris subsp. vulgaris]	-	-	-	-	-	-	-	26.48	25.37	27.74	10.25	11.7	9.1	18.05	21.19	23.48	7.82	11.48	11.07
TR11613_c0_g1	Protein of unknown function DUF716 [Macleaya cordata]	-	Family of unknown function (DUF716)	-	-	-	-	-	2.16	2.57	1.86	2.01	2.12	1.97	2.33	2.35	2.6	0.93	1.02	0.78
TR116131_c0_g2	PREDICTED: interleukin-10 receptor subunit alpha [Macaca mulatta]	-	-	-	-	-	-	-	1.57	0.16	0.36	0.07	0.1	0.08	0.15	0.17	0.11	0.06	0	0.03
TR11615_c0_g1	PREDICTED: protein DOWNY MILDEW RESISTANCE 6-like [Nelumbo nucifera]	Flavanone 3-dioxygenase 2 OS=Oryza sativa subsp. japonica OX=39947 GN=F3H-2 PE=1 SV=1	2OG-Fe(II) oxygenase superfamily	-	-	-	-	-	27.59	27.92	27.13	8.48	9.44	9.77	13.35	12.55	11.35	3.02	2.47	2.92
TR11616_c0_g1	-	-	-	-	-	-	-	-	24.57	21.03	23.38	55.79	46.36	58.63	18.2	12.8	12.08	13.16	6.44	3.55
TR116166_c0_g1	PREDICTED: CCG-binding protein 1-like [Nelumbo nucifera]	CCG-binding protein 1 OS=Arabidopsis thaliana OX=3702 GN=MEE14 PE=1 SV=1	-	-	-	-	-	-	103.03	105.33	110.13	75.42	77.55	76.46	75.61	78.28	82.31	34.36	34.41	35.46
TR116169_c0_g1	hypothetical protein AQUCO_01100510v1 [Aquilegia coerulea]	C2 and GRAM domain-containing protein At5g50170 OS=Arabidopsis thaliana OX=3702 GN=At5g50170 PE=2 SV=1	Domain of unknown function (DUF4782)	-	-	-	-	-	0	0	0.16	0	0	0	0.54	0.56	0.4	0	0	0
TR11622_c0_g1	LRR receptor-like kinase resistance protein [Trifolium pratense]	-	Leucine rich repeat;Leucine Rich repeats (2 copies);Leucine Rich Repeat	-	-	-	-	-	3.44	2.77	2.49	2	1.96	1.88	6.49	5.09	6.49	1.98	1.13	1.41
TR11623_c0_g1	PREDICTED: low-temperature-induced cysteine proteinase-like [Nelumbo nucifera]	Oryzain alpha chain OS=Oryza sativa subsp. japonica OX=39947 GN=Os04g0650000 PE=1 SV=2	Papain family cysteine protease;Cathepsin propeptide inhibitor domain (I29);Granulin	-	-	-	-	-	0.59	0.53	0.65	0.14	0.13	0.2	0.44	0.47	0.46	2.11	2.22	2.13
TR11624_c0_g2	PREDICTED: basic leucine zipper 9-like isoform X1 [Nelumbo nucifera]	bZIP transcription factor RISBZ4 OS=Oryza sativa subsp. japonica OX=39947 GN=RISBZ4 PE=2 SV=2	bZIP transcription factor;Basic region leucine zipper	-	-	-	-	-	4.97	4.33	4.8	1.18	1.73	2.07	2.62	2.88	2.69	1.87	1.99	2.35
TR11630_c0_g1	Protein of unknown function DUF668 [Macleaya cordata]	-	Protein of unknown function (DUF668);Domain of unknown function (DUF3475)	-	-	-	-	-	13.38	13.56	14.12	2.78	2.66	3.23	3.71	3.68	3.91	6.35	5.83	5.31
TR11630_c4_g1	-	-	-	-	-	-	-	-	2.73	2.69	2.61	0.83	0.93	0.92	1.14	0.96	0.81	0.44	0.29	0.3
TR11634_c0_g1	Lanthionine synthetase C-like [Macleaya cordata]	LanC-like protein GCL1 OS=Arabidopsis thaliana OX=3702 GN=GCL1 PE=2 SV=1	Lanthionine synthetase C-like protein	-	-	-	-	-	21.8	22.34	22.92	3.55	3.99	3.89	5.8	6.33	5.64	3.98	3.86	4.7
TR11646_c0_g1	hypothetical protein AQUCO_09100043v1 [Aquilegia coerulea]	Protein DETOXIFICATION 16 OS=Arabidopsis thaliana OX=3702 GN=DTX16 PE=2 SV=1	MatE;Polysaccharide biosynthesis C-terminal domain;MatE	-	-	-	-	-	3.33	3.37	3.38	3.9	4.12	4	14.21	15	15.37	11.48	11.53	12.47
TR11648_c0_g1	-	-	-	-	-	-	-	-	1.99	1.49	2.62	0.44	0.64	0.42	0.35	0.71	0.73	1.38	1.08	0.96
TR1165_c0_g1	PREDICTED: sialyltransferase-like protein 1 [Nelumbo nucifera]	Sialyltransferase-like protein 1 OS=Arabidopsis thaliana OX=3702 GN=SIA1 PE=2 SV=1	-	-	-	-	-	-	2.54	2.71	3.32	5.74	5.94	5.42	5.21	5.41	5.08	13.57	13.03	13.07
TR11651_c0_g3	transforming growth factor beta-1 proprotein preproprotein [Mus musculus]|XP_021074814.1 transforming growth factor beta-1 isoform X1 [Mus pahari]|XP_021023343.1 transforming growth factor beta-1 [Mus caroli]|P04202.1 RecName: Full=Transforming growth factor beta-1 proprotein	-	TGF-beta propeptide;Transforming growth factor beta like domain	protein import into nucleus;protein localization;transport;intracellular protein transport;nucleocytoplasmic transport;biological_process;protein transport;peptide transport;protein import;macromolecule localization;protein localization to organelle;protein localization to nucleus;cellular protein localization;amide transport;establishment of protein localization;intracellular transport;nuclear t…					1.15	0.32	0.27	0	0	0.05	0.05	0.18	0	0	0.03	0
TR11653_c1_g1	pleiotropic drug resistance protein 2-like [Camellia sinensis]	ABC transporter G family member 34 OS=Arabidopsis thaliana OX=3702 GN=ABCG34 PE=2 SV=1	-	-	-	-	-	-	6.15	6.97	8.14	19.73	18.05	16.02	43.06	53.13	44.85	23.41	27.21	28.29
TR116557_c0_g1	-	-	-	-	-	-	-	-	2.1	2.89	0.82	0.23	0.39	0.32	0.73	0.59	0.75	0.4	0.62	1
TR11656_c0_g1	PREDICTED: GTP-binding protein ERG [Nelumbo nucifera]|XP_010262809.1 PREDICTED: GTP-binding protein ERG [Nelumbo nucifera]|XP_010262810.1 PREDICTED: GTP-binding protein ERG [Nelumbo nucifera]	GTP-binding protein ERG OS=Antirrhinum majus OX=4151 GN=ERG PE=2 SV=1	-	-	-	-	-	-	6.75	7.71	6.18	1.77	0.65	1.14	1.68	1.99	1.84	3.03	3.91	3.67
TR11662_c1_g1	Transposon, En/Spm-like protein [Cinnamomum micranthum f. kanehirae]	-	-	-	-	-	-	-	2.3	2.6	2.05	1.88	2.24	1.65	2.33	2.02	2.09	0.48	0.52	0.68
TR116638_c0_g1	tubulin alpha chain-like [Cynara cardunculus var. scolymus]|KVH92713.1 Alpha tubulin [Cynara cardunculus var. scolymus]	Tubulin alpha-1 chain OS=Anemia phyllitidis OX=12940 GN=TUBA1 PE=2 SV=1	-	-	-	-	-	-	0.67	0.54	0.52	0.91	1.19	0.86	2.1	2.01	2.24	0.19	0.3	0.38
TR11673_c0_g1	-	-	-	-	-	-	-	-	0.78	0.55	0.57	1.26	1.34	1.27	2.73	2.61	3.06	2.11	2.7	3.96
TR11673_c6_g1	-	-	-	-	-	-	-	-	0.05	0.05	0	0.24	0.47	0.51	1.64	1.69	1.55	0.56	0.51	0.57
TR116748_c0_g1	Protein of unknown function DUF1218 [Macleaya cordata]	-	-	-	-	-	-	-	2.26	1.9	2.25	0.26	0.51	0.1	0.37	0.26	0.06	0.2	0.16	0.07
TR116822_c0_g1	C-X-C motif chemokine 2 precursor [Mus musculus]|P10889.2 RecName: Full=C-X-C motif chemokine 2	-	Small cytokines (intecrine/chemokine), interleukin-8 like	-	-	-	-	-	7.29	1.01	0.41	0.16	0.06	0	0.23	0.25	0.06	0.07	0.1	0.07
TR11684_c0_g1	-	-	-	-	-	-	-	-	44.55	29.41	30.03	68.27	63.57	71.36	19.16	21.48	13.81	60.57	58.33	40.89
TR11689_c0_g1	Ckb protein, partial [Rattus norvegicus]	-	ATP:guanido phosphotransferase, C-terminal catalytic domain;ATP:guanido phosphotransferase, N-terminal domain	-	-	-	-	-	3.16	0.72	0.92	0.09	0.38	0.17	0.65	0.5	0.27	0.11	0.08	0.05
TR11689_c1_g1	hypothetical protein, partial [Escherichia coli]	-	ATP:guanido phosphotransferase, C-terminal catalytic domain;ATP:guanido phosphotransferase, N-terminal domain	response to stress;biological_process;response to temperature stimulus;response to abiotic stimulus;response to stimulus;metabolic process;phosphorus metabolic process;phosphate-containing compound metabolic process;cellular process;cellular metabolic process;cellular modified amino acid metabolic process;phosphagen metabolic process;phosphocreatine metabolic process;nitrogen compound metabolic p…	molecular_function;catalytic activity;kinase activity;transferase activity;transferase activity, transferring phosphorus-containing groups;phosphotransferase activity, nitrogenous group as acceptor;nucleotide binding;binding;drug binding;purine nucleotide binding;adenyl nucleotide binding;ribonucleotide binding;purine ribonucleotide binding;adenyl ribonucleotide binding;purine ribonucleoside trip…	intracellular;cellular_component;extracellular region;cell;extracellular region part;intracellular part;cell part;cytoplasm;extracellular space	-	-	2.24	1.16	1.07	0.28	0.51	0.35	0.97	0.94	0.55	0.44	0.18	0.16
TR11696_c1_g2	hypothetical protein GLYMA_09G133900 [Glycine max]|RZB91899.1 putative protein ORF91 [Glycine soja]	-	-	-	-	-	-	-	63.12	59.08	64.09	48.85	45.69	46.34	50.76	35.65	38.94	18.52	17.54	18.85
TR11698_c0_g1	-	-	-	-	-	-	-	-	0.39	0.56	0.32	2.17	1.86	1.78	1.03	1.05	1	0.71	1.1	0.87
TR11702_c0_g1	zinc finger protein [Macleaya cordata]	RING-H2 finger protein ATL67 OS=Arabidopsis thaliana OX=3702 GN=ATL67 PE=2 SV=1	Ring finger domain;RING-H2 zinc finger domain;RING-like zinc finger;Zinc finger, C3HC4 type (RING finger)	-	-	-	-	-	0.92	0.83	0.7	0.67	0.62	0.32	1.43	2.08	2.21	0.72	0.6	0.53
TR117020_c0_g1	Protein kinase domain [Macleaya cordata]	LRR receptor-like serine/threonine-protein kinase ERL1 OS=Arabidopsis thaliana OX=3702 GN=ERL1 PE=1 SV=1	Protein kinase domain;Protein tyrosine kinase	-	-	-	-	-	0.43	0.63	0.96	0.05	0.15	0	0.19	0.07	0.08	0.09	0.02	0.09
TR11704_c0_g1	-	-	-	-	-	-	-	-	2.28	2.16	0.9	5.76	4.55	5.18	1.35	2.24	1.67	3.86	2.79	3.68
TR11711_c1_g1	-	-	-	-	-	-	-	-	0.95	0.31	0.24	0.07	0.06	0.1	0.31	0.15	0.08	0.05	0.02	0
TR11713_c0_g1	lipoyl synthase, chloroplastic [Coffea arabica]	Lipoyl synthase, chloroplastic OS=Arabidopsis thaliana OX=3702 GN=LIP1P PE=1 SV=2	-	-	-	-	-	-	2.89	2.32	2.32	9.04	7.95	8.88	6.18	5.32	5.52	6.27	4.33	5.16
TR11717_c0_g1	-	-	-	-	-	-	-	-	0	0	0	0	0	0	2.36	3.99	7.17	0	0	0
TR11718_c0_g1	-	-	-	-	-	-	-	-	29.27	29.67	21.24	12.72	15.03	13.69	4.64	4.64	6.29	4.51	5.71	5.13
TR11721_c0_g1	hypothetical protein AQUCO_00100603v1 [Aquilegia coerulea]	PsbP domain-containing protein 5, chloroplastic OS=Arabidopsis thaliana OX=3702 GN=PPD5 PE=1 SV=3	PsbP	-	-	-	-	-	6.98	8.09	7.68	5.4	6.05	5.82	2.86	3.13	2.63	2.46	2.33	2.54
TR11725_c1_g2	-	Calmodulin OS=Mougeotia scalaris OX=13158 PE=2 SV=3	-	-	-	-	-	-	1.08	1.13	1.2	1.55	1.64	1.85	2.43	2.37	2.46	0.7	0.44	0.68
TR11728_c0_g1	UDP-glucuronosyl/UDP-glucosyltransferase [Macleaya cordata]	Anthocyanidin 3-O-glucosyltransferase 4 (Fragment) OS=Manihot esculenta OX=3983 GN=GT4 PE=2 SV=1	-	-	-	-	-	-	255.73	177.14	255.58	38.56	35.23	25.29	16.36	17.6	28.91	35.86	65.92	33.41
TR11729_c0_g2	PREDICTED: ethylene-responsive transcription factor ERF034 [Theobroma cacao]	Ethylene-responsive transcription factor ERF035 OS=Arabidopsis thaliana OX=3702 GN=ERF035 PE=2 SV=1	AP2 domain	-	-	-	-	-	0.29	0.29	0.63	0.12	0.16	0.12	0.25	0.52	0.26	3.51	3.25	3.35
TR117307_c0_g1	Plant peroxidase [Macleaya cordata]	Peroxidase 42 OS=Arabidopsis thaliana OX=3702 GN=PER42 PE=1 SV=2	Peroxidase	-	-	-	K00430|E1.11.1.7; peroxidase [EC:1.11.1.7]	ko00940(Metabolism);ko01100(Metabolism);ko01110(Metabolism)	55.85	60.16	56.69	0.58	0.72	0.89	1.84	1.62	2.12	0.43	0.14	0.73
TR11733_c0_g2	PREDICTED: cysteine proteinase inhibitor 4-like [Nelumbo nucifera]	Cysteine proteinase inhibitor 5 OS=Oryza sativa subsp. japonica OX=39947 GN=Os01g0915401 PE=3 SV=2	Aspartic acid proteinase inhibitor;Cystatin domain	-	-	-	K13899|CST3; cystatin-C	ko04970(Organismal Systems)	15.65	12.88	14.82	6.69	6.5	7.06	25.07	25.94	32.72	5.18	3.93	3.73
TR11739_c3_g1	uncharacterized protein LOC110628885 [Manihot esculenta]	-	-	-	-	-	-	-	0.49	0.79	0.93	1.21	1.65	1.37	0.12	0.28	0.12	0.57	0.34	0.14
TR1174_c0_g2	inorganic phosphate transporter 1-4 [Ziziphus jujuba]	Inorganic phosphate transporter 1-4 OS=Arabidopsis thaliana OX=3702 GN=PHT1-4 PE=1 SV=1	Sugar (and other) transporter;Major Facilitator Superfamily	-	-	-	-	-	41.91	44.53	42.21	45.42	44.95	45.82	63.14	64.09	59.07	16.8	16.07	17.15
TR1174_c0_g3	General substrate transporter [Macleaya cordata]	Inorganic phosphate transporter 1-4 OS=Arabidopsis thaliana OX=3702 GN=PHT1-4 PE=1 SV=1	Sugar (and other) transporter;Major Facilitator Superfamily	-	-	-	-	-	6.36	5.94	6.3	27.4	26.15	27.83	52.26	56.59	49.82	14.19	13.03	13.4
TR11740_c0_g1	-	-	-	-	-	-	-	-	4.09	3.23	3.15	3.7	3.81	3.28	3.15	4.24	3.68	54.58	57.28	51.32
TR117490_c0_g1	hypothetical protein VITISV_010115 [Vitis vinifera]	Retrovirus-related Pol polyprotein from transposon RE1 OS=Arabidopsis thaliana OX=3702 GN=RE1 PE=2 SV=1	-	-	-	-	-	-	0.09	0.09	0.05	0.33	0.1	0.31	1.31	0.94	1.41	0.13	0.56	0.19
TR11751_c0_g1	hypothetical protein AQUCO_03500197v1 [Aquilegia coerulea]	Peroxidase 47 OS=Arabidopsis thaliana OX=3702 GN=PER47 PE=2 SV=2	Peroxidase	-	-	-	K00430|E1.11.1.7; peroxidase [EC:1.11.1.7]	ko00940(Metabolism);ko01100(Metabolism);ko01110(Metabolism)	18.95	17.23	15.79	6.77	8.2	8.04	3.92	3.46	4.12	1.08	1.46	1.39
TR117512_c0_g1	cholesterol side-chain cleavage enzyme, mitochondrial precursor [Rattus norvegicus]|P14137.1 RecName: Full=Cholesterol side-chain cleavage enzyme, mitochondrial	Cytochrome P450 71B38 OS=Arabidopsis thaliana OX=3702 GN=CYP71B38 PE=2 SV=2	Cytochrome P450	metabolic process;biological_process;lipid metabolic process;steroid biosynthetic process;steroid metabolic process;C21-steroid hormone metabolic process;lipid biosynthetic process;biosynthetic process;cellular process;regulation of hormone levels;cellular hormone metabolic process;hormone metabolic process;hormone biosynthetic process;cellular metabolic process;primary metabolic process;cellular…	molecular_function;binding;metal ion binding;ion binding;cation binding;transition metal ion binding;catalytic activity;monooxygenase activity;oxidoreductase activity;steroid hydroxylase activity;oxidoreductase activity, acting on paired donors, with incorporation or reduction of molecular oxygen;oxidoreductase activity, acting on paired donors, with incorporation or reduction of molecular oxygen…	intracellular;cellular_component;membrane;mitochondrion;cell;cytoplasm;mitochondrial envelope;mitochondrial inner membrane;intracellular membrane-bounded organelle;organelle inner membrane;organelle membrane;mitochondrial membrane;organelle envelope;envelope;somatodendritic compartment;neuronal cell body;organelle;membrane-bounded organelle;intracellular organelle;cell body;organelle part;intrace…	-	-	2.83	0.52	1	0.28	0.16	0.26	0.46	0.4	0.41	0.08	0.04	0.08
TR11752_c0_g1	hypothetical protein CUMW_088110, partial [Citrus unshiu]	Ras-related protein RABE1c OS=Arabidopsis thaliana OX=3702 GN=RABE1C PE=1 SV=1	-	-	-	-	-	-	4.1	4.28	3.64	5.46	6.29	5.08	5.92	6.81	9.83	0.85	0.5	0.64
TR11761_c0_g1	-	-	-	-	-	-	-	-	0	0	0	2.42	2.16	3.17	0	0	0	0	0.5	0.71
TR11765_c3_g1	unnamed protein product [Macaca fascicularis]	-	-	-	-	-	-	-	3.2	0.96	1.1	0.11	0.23	0.37	0.7	0.48	0.2	0.13	0.09	0.35
TR11767_c0_g1	hypothetical protein XAC3610_10050001 [Xanthomonas citri pv. citri]|CEH63558.1 hypothetical protein XACLG97_9100001 [Xanthomonas citri pv. citri]|CEI15539.1 hypothetical protein XACB302_8740001 [Xanthomonas citri pv. citri]|CEI35905.1 hypothetical protein XACJJ10_1720001 [Xanthomonas citri pv. citri]|CEH45422.1 hypothetical protein XACLD7_12360002 [Xanthomonas citri pv. citri]|CEH54604.1 hypothet…	-	-	-	-	-	-	-	38.77	25.85	118.37	12.21	13.22	16.38	45.67	13.18	29.42	8.86	5.3	24.47
TR117701_c0_g1	PREDICTED: cystatin-F [Macaca mulatta]|XP_005568211.1 PREDICTED: cystatin-F [Macaca fascicularis]|XP_011748083.1 cystatin-F [Macaca nemestrina]|EHH19986.1 Leukocystatin [Macaca mulatta]|EHH65611.1 Leukocystatin [Macaca fascicularis]	-	Cystatin domain	-	-	-	-	-	2.93	1.09	0.9	0.13	0.09	0.27	0.45	0.09	0.09	0	0.05	0.11
TR11771_c0_g1	protein MEI2-like protein 2 [Cinnamomum micranthum f. kanehirae]	Protein MEI2-like 5 OS=Arabidopsis thaliana OX=3702 GN=ML5 PE=1 SV=1	-	-	-	-	-	-	0.46	0.53	0.61	1.56	1.35	1.35	3.01	2.77	3.18	2.75	2.26	2.49
TR11782_c0_g1	hypothetical protein AQUCO_10800029v1 [Aquilegia coerulea]	MACPF domain-containing protein At1g14780 OS=Arabidopsis thaliana OX=3702 GN=At1g14780 PE=2 SV=1	MAC/Perforin domain;MAC/Perforin domain	-	-	-	-	-	12.98	14.56	14.57	24.71	24.12	23.59	42.52	43.38	40.79	15.76	14.82	15.73
TR11783_c0_g1	-	-	-	-	-	-	-	-	0.11	0	0.06	1.16	0.85	0.81	0	0.03	0	0.7	0.41	0.55
TR11784_c0_g1	hypothetical protein AQUCO_00400341v1 [Aquilegia coerulea]	Vacuolar cation/proton exchanger 3 OS=Arabidopsis thaliana OX=3702 GN=CAX3 PE=1 SV=1	-	-	-	-	-	-	105.24	111.78	111.82	95.15	102.13	102.73	155.47	151.32	165.64	283.61	273.29	289.91
TR11788_c0_g1	hypothetical protein AQUCO_00201386v1 [Aquilegia coerulea]	Butyrate--CoA ligase AAE11, peroxisomal OS=Arabidopsis thaliana OX=3702 GN=AAE11 PE=1 SV=1	AMP-binding enzyme;AMP-binding enzyme C-terminal domain	-	-	-	-	-	11.5	12.18	11.23	1.31	1.77	1.69	7.91	7.26	7.21	0.07	0.17	0.24
TR117918_c0_g1	Protein kinase domain [Macleaya cordata]	Mitogen-activated protein kinase kinase kinase 1 OS=Arabidopsis thaliana OX=3702 GN=MEKK1 PE=1 SV=2	Protein kinase domain;Protein tyrosine kinase	-	-	-	-	-	80.93	83.2	86.28	34.7	34.46	37.81	36.98	36.6	37.89	20.04	18.67	19.55
TR11798_c0_g1	PREDICTED: LOW QUALITY PROTEIN: uncharacterized protein LOC101106326 isoform X2 [Ovis aries musimon]	-	Ferritin-like domain	-	-	-	-	-	9.25	1.08	1.28	0.26	0	0.73	0.74	0.53	0.18	0.23	0	0.23
TR118_c0_g1	PREDICTED: ATP-dependent RNA helicase DEAH11, chloroplastic [Nelumbo nucifera]	Probable E3 ubiquitin-protein ligase ARI10 OS=Arabidopsis thaliana OX=3702 GN=ARI10 PE=2 SV=1	IBR domain, a half RING-finger domain	-	-	-	-	-	8.18	8.76	8.82	7.64	6.94	6.72	19.45	20.44	19.85	17.6	18.16	17.03
TR118_c1_g1	Ribosomal protein L4/L1e [Macleaya cordata]	60S ribosomal protein L4 OS=Prunus armeniaca OX=36596 GN=RPL4 PE=2 SV=1	Ribosomal protein L4/L1 family;60S ribosomal protein L4 C-terminal domain	-	-	-	K02930|RP-L4e, RPL4; large subunit ribosomal protein L4e	ko03010(Genetic Information Processing)	127.13	137.32	134.28	163.87	156.67	164.52	79.27	80.45	73.23	63.85	60.28	65.11
TR1180_c0_g1	putative peptide/nitrate transporter -like protein [Gossypium arboreum]	Probable peptide/nitrate transporter At3g43790 OS=Arabidopsis thaliana OX=3702 GN=ZIFL2 PE=2 SV=2	Major Facilitator Superfamily;Sugar (and other) transporter	-	-	-	-	-	5.45	6.25	6.39	5.23	4.92	5.32	3.07	3.97	3.47	9.69	9.01	10.23
TR11807_c0_g1	-	-	-	-	-	-	-	-	0	0	0	0	0	0.18	11.33	12.02	10.8	0.68	0.97	1.14
TR11809_c0_g1	Peptidase S10 [Macleaya cordata]	Serine carboxypeptidase-like 50 OS=Arabidopsis thaliana OX=3702 GN=SCPL50 PE=2 SV=1	Serine carboxypeptidase	-	-	-	-	-	2.13	2.35	2.2	6.06	6.3	5.24	3.81	4.8	5.35	5.54	6.76	6.13
TR11813_c0_g1	rCG23986, isoform CRA_e [Rattus norvegicus]	-	-	-	-	-	-	-	5.05	1.1	1.06	0.37	0.35	0.42	1.02	0.51	0.27	0.36	0.04	0.2
TR11816_c0_g2	hemoglobin subunit beta [Macaca fascicularis]|NP_001292888.1 hemoglobin subunit beta [Cercocebus atys]|XP_011717123.1 hemoglobin subunit beta [Macaca nemestrina]|P68222.2 RecName: Full=Hemoglobin subunit beta	-	Globin	-	-	-	-	-	880.42	161.28	190.23	21.98	48.36	33.29	124.38	73.04	40.41	12.53	9.03	19.5
TR1182_c0_g1	PREDICTED: ethylene-responsive transcription factor 12-like [Nelumbo nucifera]	Ethylene-responsive transcription factor 12 OS=Arabidopsis thaliana OX=3702 GN=ERF12 PE=1 SV=1	AP2 domain	-	-	-	-	-	6.57	6.2	6.22	2.02	2.32	1.86	2.49	2.55	2.25	0.37	0.4	0.56
TR1182_c0_g2	EREBP-like factor [Salvia splendens]	Ethylene-responsive transcription factor 12 OS=Arabidopsis thaliana OX=3702 GN=ERF12 PE=1 SV=1	AP2 domain	-	-	-	-	-	47.18	45.71	55.47	63.48	58.63	61.1	8.24	9.86	8.34	1.89	2	3.04
TR1182_c1_g1	PREDICTED: uncharacterized protein LOC18609739 [Theobroma cacao]|EOY00903.1 Mediator of RNA polymerase II transcription subunit 18, putative [Theobroma cacao]	-	-	-	-	-	-	-	86.67	89.31	86.96	33.88	34.23	34.3	46.51	46.27	44.34	13.72	12.92	12.15
TR1182_c2_g1	PREDICTED: zinc finger protein ZAT10 [Nelumbo nucifera]	Zinc finger protein ZAT10 OS=Arabidopsis thaliana OX=3702 GN=ZAT10 PE=2 SV=1	C2H2-type zinc finger;Zinc-finger double-stranded RNA-binding;C2H2-type zinc finger	-	-	-	-	-	164.24	172.54	167.39	220.38	220.27	210.26	94.27	103.28	101.69	26.53	26.94	26.69
TR118221_c0_g1	PREDICTED: E3 ubiquitin-protein ligase ORTHRUS 2-like [Nelumbo nucifera]	E3 ubiquitin-protein ligase ORTHRUS 2 OS=Arabidopsis thaliana OX=3702 GN=ORTH2 PE=1 SV=1	SAD/SRA domain;RING-type zinc-finger;Zinc finger, C3HC4 type (RING finger);Zinc finger, C3HC4 type (RING finger);Zinc finger, C3HC4 type (RING finger);zinc finger of C3HC4-type, RING;Ring finger domain	-	-	-	-	-	2.18	1.98	1.71	1.48	1.19	1.21	0.6	0.61	0.84	0.64	0.68	0.82
TR118221_c0_g2	zinc finger protein [Macleaya cordata]	E3 ubiquitin-protein ligase ORTHRUS 2 OS=Arabidopsis thaliana OX=3702 GN=ORTH2 PE=1 SV=1	RING-type zinc-finger	-	-	-	-	-	0	0.05	0.11	0	0	0	0.62	0.57	0.29	0	0.03	0
TR118271_c0_g1	hypothetical protein CDL15_Pgr010055 [Punica granatum]	Protein disulfide-isomerase like 2-1 OS=Arabidopsis thaliana OX=3702 GN=PDIL2-1 PE=2 SV=1	-	-	-	-	-	-	53.49	32.41	46.34	5.46	4.04	6.5	26.27	22.41	21.73	28.53	15.39	22.05
TR11829_c0_g1	-	-	-	-	-	-	-	-	2.07	1.61	0.28	4.84	6.76	4.42	2.53	2.3	0.82	8.89	11.86	8.85
TR11836_c0_g1	PREDICTED: uncharacterized protein LOC104605671 [Nelumbo nucifera]	-	Cotton fibre expressed protein;Domain of unknown function (DUF4408)	-	-	-	-	-	23.62	28.03	27.03	32.37	29.97	32.2	6.82	6.77	6.06	4.55	5.37	4.77
TR11836_c0_g2	hypothetical protein AQUCO_00800001v1 [Aquilegia coerulea]	-	Domain of unknown function (DUF4408)	-	-	-	-	-	9.01	10.19	10.47	5.18	5.74	5.21	8.98	10.38	9.01	2.71	2.43	2.47
TR1184_c1_g1	-	-	-	-	-	-	-	-	1.79	1.96	1.64	1.63	1.81	1.92	0.81	0.57	0.13	0.77	0.81	1.08
TR11840_c0_g1	F-box domain [Macleaya cordata]	F-box/LRR-repeat protein At4g14096 OS=Arabidopsis thaliana OX=3702 GN=At4g14096 PE=2 SV=1	FBD;F-box domain	-	-	-	-	-	3.5	3.59	3.79	1.8	1.53	1.5	1.69	2.02	2.4	2.6	2.94	2.54
TR11842_c0_g1	PREDICTED: protein NRT1/ PTR FAMILY 3.1-like [Nelumbo nucifera]	Protein NRT1/ PTR FAMILY 3.1 OS=Arabidopsis thaliana OX=3702 GN=NPF3.1 PE=2 SV=1	POT family	-	-	-	-	-	0.86	1.27	1.33	0.95	0.64	1.03	4.67	5.14	3.94	1.24	1.38	1.12
TR11845_c0_g1	Peptide chain release factor class I/class II [Macleaya cordata]	Peptide chain release factor PrfB2, chloroplastic OS=Arabidopsis thaliana OX=3702 GN=PRFB2 PE=3 SV=1	PCRF domain;RF-1 domain	-	-	-	-	-	1.44	2.37	1.81	1.44	1.84	1.63	1.7	1.68	1.34	3.02	3.02	2.87
TR1185_c0_g1	PREDICTED: queuine tRNA-ribosyltransferase catalytic subunit 1-like isoform X1 [Nelumbo nucifera]|XP_010266861.1 PREDICTED: queuine tRNA-ribosyltransferase catalytic subunit 1-like isoform X1 [Nelumbo nucifera]|XP_010266870.1 PREDICTED: queuine tRNA-ribosyltransferase catalytic subunit 1-like isoform X1 [Nelumbo nucifera]|XP_010266879.1 PREDICTED: queuine tRNA-ribosyltransferase catalytic subunit…	-	Queuine tRNA-ribosyltransferase	-	-	-	-	-	2.97	3.03	1.92	1.34	1.27	1.32	2.26	2.44	3.32	0.58	0.63	0.45
TR11850_c0_g1	-	-	-	-	-	-	-	-	1.61	1.66	1.27	0.04	0	0.15	0.7	1.16	0.78	1.05	1.58	1.18
TR11850_c1_g1	hypothetical protein AQUCO_00201124v1 [Aquilegia coerulea]	-	-	-	-	-	-	-	28.22	21.45	17.15	5.13	1.13	1.25	1.89	2.13	2.92	0.77	0.72	0
TR118567_c0_g1	PREDICTED: serpin-ZX-like [Nelumbo nucifera]	Serpin-ZX OS=Arabidopsis thaliana OX=3702 GN=At1g47710 PE=1 SV=1	Serpin (serine protease inhibitor)	-	-	-	-	-	0	0.04	0.1	0.07	0.05	0.05	0.1	0.14	0	2.48	2.47	2.8
TR11858_c0_g1	-	-	-	-	-	-	-	-	0	0.05	0	1.78	1.64	1.93	0.47	0.88	0.98	0.23	0.52	0.47
TR11860_c0_g1	PREDICTED: DNA-directed RNA polymerase V subunit 5A isoform X2 [Vitis vinifera]	DNA-directed RNA polymerase V subunit 5C OS=Arabidopsis thaliana OX=3702 GN=NRPE5C PE=2 SV=1	RNA polymerase Rpb5, N-terminal domain;RNA polymerase Rpb5, C-terminal domain	-	-	-	K03013|RPB5, POLR2E; DNA-directed RNA polymerases I, II, and III subunit RPABC1	ko03020(Genetic Information Processing);ko04623(Organismal Systems)	3.16	3.02	3.27	1.25	1.59	1.49	1.94	1.75	1.75	3.35	2.87	2.83
TR11860_c1_g1	PREDICTED: diacylglycerol O-acyltransferase 1 isoform X1 [Elaeis guineensis]	Diacylglycerol O-acyltransferase 1 OS=Corylus americana OX=78632 GN=DGAT1 PE=1 SV=1	-	-	-	-	-	-	0.58	0.56	0.5	0.66	0.68	1.2	0.32	0.28	0.12	0.18	0.19	0.11
TR118629_c0_g1	PREDICTED: leukocyte-specific transcript 1 protein [Macaca fascicularis]|XP_005553598.1 PREDICTED: leukocyte-specific transcript 1 protein [Macaca fascicularis]|XP_015305115.1 PREDICTED: leukocyte-specific transcript 1 protein [Macaca fascicularis]|XP_015305116.1 PREDICTED: leukocyte-specific transcript 1 protein [Macaca fascicularis]	-	LST-1 protein	-	-	-	-	-	1.24	0.52	0.85	0	0	0	0.24	0.12	0	0	0	0
TR1187_c5_g1	AAA+ ATPase domain [Macleaya cordata]	-	PIF1-like helicase;AAA domain;AAA domain;AAA domain	-	-	-	-	-	5.01	5.23	4.94	3.52	3.91	3.93	0.98	0.89	1	1.61	1.68	1.56
TR11870_c0_g1	-	-	-	-	-	-	-	-	0	0	0	0	0	0	1.33	0.84	0.52	0	0	0
TR11879_c0_g1	putative fructokinase-7 [Cinnamomum micranthum f. kanehirae]	Probable fructokinase-7 OS=Arabidopsis thaliana OX=3702 GN=At5g51830 PE=1 SV=1	pfkB family carbohydrate kinase	-	-	-	K00847|E2.7.1.4, scrK; fructokinase [EC:2.7.1.4]	ko00051(Metabolism);ko00500(Metabolism);ko00520(Metabolism);ko01100(Metabolism);ko01110(Metabolism)	14.2	14.81	14.28	16.38	16.89	19.91	8.45	8.31	8.05	8.46	8.17	9.64
TR1188_c0_g3	alpha-galactosidase [Ricinus communis]|EEF36784.1 alpha-galactosidase/alpha-n-acetylgalactosaminidase, putative [Ricinus communis]	Alpha-galactosidase 2 OS=Arabidopsis thaliana OX=3702 GN=AGAL2 PE=1 SV=1	Alpha galactosidase A;Alpha galactosidase A C-terminal beta sandwich domain	-	-	-	K07407|E3.2.1.22B, galA, rafA; alpha-galactosidase [EC:3.2.1.22]	ko00052(Metabolism);ko00561(Metabolism);ko00600(Metabolism);ko00603(Metabolism);ko01100(Metabolism)	12.14	14.62	13.85	27.7	26.54	27.51	21.93	23.71	23.89	18.36	20.82	18.4
TR1188_c1_g2	-	-	-	-	-	-	-	-	2.18	1.75	2.05	4.36	3.8	3.32	8.65	8.95	12.41	9.26	8.1	7.66
TR1188_c4_g1	PREDICTED: WRKY transcription factor 22-like [Nelumbo nucifera]	-	-	-	-	-	-	-	9.11	9.67	10.25	12.02	11.69	13.36	3.79	6.08	5.87	1.96	3.04	3
TR118832_c0_g1	PREDICTED: cytochrome P450 86B1-like [Nelumbo nucifera]	Cytochrome P450 86B1 OS=Arabidopsis thaliana OX=3702 GN=CYP86B1 PE=2 SV=1	Cytochrome P450	-	-	-	K15402|CYP86B1; fatty acid omega-hydroxylase [EC:1.14.-.-]	ko00073(Metabolism)	0.33	0.3	0.35	0.03	0.07	0.04	0	0	0.08	0.89	0.84	0.57
TR119_c0_g1	BURP domain [Macleaya cordata]	BURP domain protein RD22 OS=Arabidopsis thaliana OX=3702 GN=RD22 PE=2 SV=1	BURP domain	-	-	-	-	-	210.85	215.73	215.98	205.73	203.39	205.02	52.97	51.36	52.53	73.87	69.94	71.79
TR11905_c0_g1	-	-	Leucine rich repeat;Leucine Rich repeats (2 copies);Leucine Rich Repeat	-	-	-	-	-	4.98	1.62	2.45	5.01	1.84	3.02	10.08	12	14.54	2.48	4.32	2.13
TR11908_c0_g1	polygalacturonase-like [Camellia sinensis]	Polygalacturonase OS=Gossypium hirsutum OX=3635 GN=G9 PE=2 SV=1	Pectate lyase superfamily protein	-	-	-	-	-	0.26	0.26	0.32	2	2.37	2.23	1.93	2.64	1.56	29.95	29.32	22.27
TR11910_c0_g1	GNS1/SUR4 membrane protein [Macleaya cordata]	Elongation of fatty acids protein 3-like OS=Arabidopsis thaliana OX=3702 GN=HOS3 PE=2 SV=1	GNS1/SUR4 family	-	-	-	-	-	1.4	2.36	2.34	2.37	2.74	1.85	0.39	0.59	0.6	0.64	0.42	0.8
TR11919_c0_g1	PREDICTED: 60S ribosomal protein L27a-like [Hipposideros armiger]	60S ribosomal protein L27a-3 OS=Arabidopsis thaliana OX=3702 GN=RPL27AC PE=2 SV=2	Ribosomal proteins 50S-L15, 50S-L18e, 60S-L27A	-	-	-	K02900|RP-L27Ae, RPL27A; large subunit ribosomal protein L27Ae	ko03010(Genetic Information Processing)	28.39	5.92	8.28	1.67	1.94	3.91	5.76	3.66	2.89	1.94	0.86	1.95
TR11920_c0_g1	Protein of unknown function DUF1313 [Macleaya cordata]	Protein ELF4-LIKE 1 OS=Arabidopsis thaliana OX=3702 GN=EFL1 PE=2 SV=1	-	-	-	-	-	-	16.09	14.73	13.14	7.96	6.54	6.97	10.81	9.39	7.8	0	0.44	1.35
TR11922_c2_g1	-	-	-	-	-	-	-	-	1.41	0.26	0.56	0.07	0.09	0.06	0.19	0.19	0.06	0.02	0	0.04
TR11923_c0_g1	hypothetical protein AQUCO_05600019v1 [Aquilegia coerulea]	Cytochrome P450 71A2 OS=Solanum melongena OX=4111 GN=CYP71A2 PE=2 SV=1	Cytochrome P450	-	-	-	-	-	119.53	118.69	140.34	155.04	144.72	151.75	156.54	172.14	172.25	342.37	364.9	315.31
TR11924_c1_g1	PREDICTED: LOB domain-containing protein 12 [Nelumbo nucifera]	LOB domain-containing protein 12 OS=Arabidopsis thaliana OX=3702 GN=LBD12 PE=1 SV=2	-	-	-	-	-	-	11.1	11.63	12.64	3.41	4.82	4.24	3.18	3.99	3.77	1.17	1.22	0.98
TR11929_c0_g1	hypothetical protein C5167_047056 [Papaver somniferum]	18.2 kDa class I heat shock protein OS=Medicago sativa OX=3879 GN=HSP18.2 PE=2 SV=1	-	-	-	-	K13993|HSP20; HSP20 family protein	ko04141(Genetic Information Processing)	38.66	42.64	38.02	16.72	18.22	16.34	9.98	8.81	12.18	1.67	0.83	2.07
TR1193_c4_g1	PREDICTED: protein DEHYDRATION-INDUCED 19 homolog 5-like [Nelumbo nucifera]	Protein DEHYDRATION-INDUCED 19 homolog 5 OS=Oryza sativa subsp. japonica OX=39947 GN=DI19-5 PE=2 SV=1	Drought induced 19 protein (Di19), zinc-binding	-	-	-	-	-	3.04	3.19	2.68	3.8	3.87	4.12	3.7	5.27	5	15.36	15.22	15.89
TR11933_c0_g1	Transposon Ty3-I Gag-Pol polyprotein [Vitis vinifera]	RNA-directed DNA polymerase homolog OS=Oenothera berteroana OX=3950 PE=4 SV=1	Retroviral aspartyl protease;Reverse transcriptase (RNA-dependent DNA polymerase);Retrotransposon gag protein;Integrase core domain;gag-polyprotein putative aspartyl protease	-	-	-	-	-	1.32	1.25	1.1	3.4	3.81	3.64	3.36	2.96	3.23	1.42	1.21	1.15
TR11936_c0_g1	UDP-glucuronosyl/UDP-glucosyltransferase [Macleaya cordata]	7-deoxyloganetin glucosyltransferase OS=Gardenia jasminoides OX=114476 GN=UGT85A24 PE=1 SV=1	UDP-glucoronosyl and UDP-glucosyl transferase	-	-	-	-	-	17.86	19.85	19.66	53.19	48.95	50.39	40.22	40.74	40.72	111.94	110.86	113.71
TR119440_c0_g1	PREDICTED: integrin alpha-IIb [Macaca mulatta]	-	Integrin alpha;FG-GAP repeat;Repeat domain in Vibrio, Colwellia, Bradyrhizobium and Shewanella	-	-	-	-	-	1.08	0.4	0.46	0.03	0.08	0.09	0.43	0.06	0.02	0.03	0.01	0
TR11946_c0_g2	PREDICTED: cysteine-rich receptor-like protein kinase 10 [Gossypium hirsutum]	Cysteine-rich receptor-like protein kinase 25 OS=Arabidopsis thaliana OX=3702 GN=CRK25 PE=3 SV=1	Salt stress response/antifungal;Protein tyrosine kinase;Protein kinase domain;Protein tyrosine kinase;Protein kinase domain	-	-	-	-	-	2.39	2.2	2.06	0.65	0.48	0.71	0.5	0.46	0.66	0.11	0.05	0.03
TR119474_c0_g1	-	-	-	-	-	-	-	-	3.14	0.62	1.08	0.06	0.26	0.26	0.54	0.47	0.46	0	0.05	0.11
TR1195_c0_g1	-	-	-	-	-	-	-	-	3.68	3.5	2.9	3.23	3.43	3.38	8.22	8.43	7.55	8.32	8.54	7.89
TR1195_c1_g1	Ribose-phosphate diphosphokinase [Macleaya cordata]	Ribose-phosphate pyrophosphokinase 2, chloroplastic OS=Spinacia oleracea OX=3562 GN=PRS2 PE=2 SV=1	N-terminal domain of ribose phosphate pyrophosphokinase;Phosphoribosyl transferase domain	-	-	-	K00948|PRPS, prsA; ribose-phosphate pyrophosphokinase [EC:2.7.6.1]	ko00030(Metabolism);ko00230(Metabolism);ko01100(Metabolism);ko01110(Metabolism);ko01120(Metabolism);ko01200(Metabolism);ko01230(Metabolism)	22.34	23.61	22.65	27.9	27.78	27.74	34.01	35.15	35.91	83.4	81.72	82.93
TR1195_c1_g2	ribulose-1 (chloroplast) [Rhus chinensis]	Ribulose bisphosphate carboxylase large chain OS=Eucalyptus globulus subsp. globulus OX=71271 GN=rbcL PE=3 SV=1	Ribulose bisphosphate carboxylase large chain, catalytic domain;Ribulose bisphosphate carboxylase large chain, N-terminal domain	metabolic process;biological_process;carbohydrate metabolic process;biosynthetic process;cellular process;carbon fixation;photosynthesis;carbohydrate biosynthetic process;photosynthesis, dark reaction;cellular metabolic process;primary metabolic process;organic substance metabolic process;organic substance biosynthetic process;reductive pentose-phosphate cycle;oxidation-reduction process	molecular_function;binding;metal ion binding;ion binding;cation binding;catalytic activity;oxidoreductase activity;lyase activity;carbon-carbon lyase activity;carboxy-lyase activity;ribulose-bisphosphate carboxylase activity;monooxygenase activity;magnesium ion binding	intracellular;cellular_component;cell;cytoplasm;intracellular membrane-bounded organelle;plastid;organelle;membrane-bounded organelle;intracellular organelle;intracellular part;cytoplasmic part;cell part;chloroplast	K01601|rbcL, cbbL; ribulose-bisphosphate carboxylase large chain [EC:4.1.1.39]	ko00630(Metabolism);ko00710(Metabolism);ko01100(Metabolism);ko01110(Metabolism);ko01120(Metabolism);ko01200(Metabolism)	12.63	12.83	14.27	10.17	11.14	11.31	10.61	8.73	10.03	3.91	3.88	4.36
TR1195_c2_g2	probable indole-3-pyruvate monooxygenase YUCCA10 [Quercus suber]	Probable indole-3-pyruvate monooxygenase YUCCA11 OS=Arabidopsis thaliana OX=3702 GN=YUC11 PE=2 SV=1	-	-	-	-	-	-	0	0	0.22	0	0	0	4.71	4.55	3.72	0.36	0.13	0.45
TR1195_c3_g1	PREDICTED: glutaredoxin [Lupinus angustifolius]|OIW05394.1 hypothetical protein TanjilG_28859 [Lupinus angustifolius]	Glutaredoxin OS=Ricinus communis OX=3988 PE=3 SV=1	-	-	-	-	-	-	553.44	542.25	496.16	285.85	293.77	296.56	210.69	222.99	224.25	437.79	441.26	464.19
TR1195_c4_g1	Multicopper oxidase [Macleaya cordata]	L-ascorbate oxidase OS=Nicotiana tabacum OX=4097 GN=AAO PE=2 SV=1	Multicopper oxidase;Multicopper oxidase;Multicopper oxidase;Multicopper oxidase;Multicopper oxidase	-	-	-	-	-	2.09	2.44	2.24	3.53	3.59	3.45	13.3	12.18	11.7	5.41	4.91	4.94
TR11951_c1_g1	PREDICTED: transketolase, chloroplastic [Juglans regia]	Transketolase, chloroplastic (Fragment) OS=Craterostigma plantagineum OX=4153 GN=TKT3 PE=1 SV=1	-	-	-	-	-	-	41.04	37.35	32.3	24.73	37.84	18.3	156.64	149.54	124.02	121.1	134.78	142.38
TR11957_c0_g1	lysosome-associated membrane glycoprotein 2 precursor [Rattus norvegicus]|AAH61990.1 Lysosomal-associated membrane protein 2 [Rattus norvegicus]	-	Lysosome-associated membrane glycoprotein (Lamp);Vacuolar ATP synthase subunit S1 (ATP6S1)	biological_process;regulation of protein stability;biological regulation;regulation of biological quality;cellular process;cellular homeostasis;homeostatic process;anatomical structure homeostasis;metabolic process;protein localization;peptide metabolic process;protein targeting;protein targeting to lysosome;protein targeting to vacuole;nitrogen compound metabolic process;transport;intracellular …	protein binding;molecular_function;binding;enzyme binding;protein domain specific binding	intracellular;cellular_component;lytic vacuole;membrane;lysosome;vacuole;extracellular region;extracellular space;cell;cytoplasm;lysosomal membrane;secondary lysosome;endosome;late endosome;vacuolar membrane;vacuolar lumen;autophagosome;intracellular membrane-bounded organelle;secretory granule;secretory granule membrane;endocytic vesicle;endosome membrane;endomembrane system;vesicle membrane;cyt…	-	-	1.93	0.46	0.37	0.03	0.12	0	0.12	0.16	0.17	0.1	0.1	0.1
TR1196_c0_g1	-	-	-	-	-	-	-	-	7.09	5.97	5.6	4.13	3.24	3.48	18.94	17.43	15.41	9.05	7.94	5.22
TR11961_c0_g1	-	-	-	-	-	-	-	-	38.53	34.87	36.4	18.04	20.79	19.49	32.33	23.28	27.37	11.98	5.42	6.81
TR11966_c0_g1	hypothetical protein AQUCO_00201381v1 [Aquilegia coerulea]	Methylecgonone reductase OS=Erythroxylum coca OX=289672 PE=1 SV=1	Aldo/keto reductase family	-	-	-	-	-	0.26	0.59	0.3	5.23	5.77	6.92	5.42	5.82	4.95	2.21	2.13	2.32
TR11968_c0_g1	-	-	-	-	-	-	-	-	21.39	28.91	24.8	5.81	6.16	6.72	4.28	9.1	6.55	8.52	6.85	5.56
TR1197_c5_g1	Adenylate kinase [Macleaya cordata]	Probable adenylate kinase 7, mitochondrial OS=Oryza sativa subsp. japonica OX=39947 GN=Os08g0118900 PE=2 SV=1	Adenylate kinase;AAA domain	-	-	-	K00939|adk, AK; adenylate kinase [EC:2.7.4.3]	ko00230(Metabolism);ko00730(Metabolism);ko01100(Metabolism);ko01110(Metabolism)	35.35	36.43	36.8	24.84	25.51	26.52	17.22	16.25	15.99	4.85	4.83	5.92
TR11973_c0_g1	Glutathione S-transferase U9 [Vitis vinifera]	Glutathione S-transferase U9 OS=Arabidopsis thaliana OX=3702 GN=GSTU9 PE=2 SV=1	Glutathione S-transferase, N-terminal domain;Glutathione S-transferase, N-terminal domain;Glutathione S-transferase, N-terminal domain	-	-	-	K00799|GST, gst; glutathione S-transferase [EC:2.5.1.18]	ko00480(Metabolism);ko00980(Metabolism);ko00982(Metabolism);ko00983(Metabolism);ko01100(Metabolism);ko04212(Organismal Systems)	4.98	4.62	4.52	4.14	3.43	5	3.85	4.99	4.05	0.43	0.85	0.91
TR11977_c0_g1	-	-	-	-	-	-	-	-	1.5	1.93	1.99	6.92	5.46	6.25	0.87	2.17	1.63	8.66	8.83	11.2
TR119796_c0_g1	PREDICTED: ras association domain-containing protein 5 isoform X2 [Macaca mulatta]	-	Novel Ras effector 1 C-terminal SARAH (Sav/Rassf/Hpo) domain;Ras association (RalGDS/AF-6) domain	-	-	-	-	-	1.3	0.43	0.46	0.03	0.07	0.12	0.27	0.15	0.09	0.07	0.01	0
TR11980_c0_g1	Cellulose synthase-like protein E6 [Vitis vinifera]	-	-	-	-	-	-	-	14.03	22.94	17.34	0	0	0.58	14.47	15.15	12.02	9.73	6.49	5.61
TR11981_c0_g1	-	-	-	-	-	-	-	-	4.44	3.2	12.32	0	0	0	0	0	0	0	0.46	0
TR11984_c0_g1	UDP-glucose: flavonoid 3-O-glucosyltransferase, partial [Morella rubra]	Anthocyanidin 3-O-glucosyltransferase 1 OS=Fragaria ananassa OX=3747 GN=GT1 PE=1 SV=1	-	-	-	-	-	-	11.09	10.94	10.11	3.07	2.39	3.53	3.91	4.1	3.58	0.6	0.83	1.49
TR11986_c0_g1	hypothetical protein AQUCO_03200069v1 [Aquilegia coerulea]	-	-	-	-	-	-	-	21.87	13.29	11.56	0.72	1.82	0	5.35	1.04	5.02	2.64	5.36	1.26
TR11994_c0_g1	Glycoside hydrolase [Macleaya cordata]	Probable glucan endo-1,3-beta-glucosidase A6 OS=Arabidopsis thaliana OX=3702 GN=A6 PE=2 SV=1	Glycosyl hydrolases family 17;X8 domain	-	-	-	-	-	17.51	18.77	18.89	16.76	16.82	15.54	13.25	13.17	11.36	63.76	62.22	66.27
TR12_c2_g1	-	-	-	-	-	-	-	-	8.74	7.33	5.87	0	0	0	0.92	0.44	0	0	0	0.56
TR1200_c0_g1	PREDICTED: probable receptor-like protein kinase At5g56460 [Nelumbo nucifera]	Probable serine/threonine-protein kinase PBL16 OS=Arabidopsis thaliana OX=3702 GN=PBL16 PE=1 SV=1	Protein kinase domain;Protein tyrosine kinase	-	-	-	-	-	1.73	1.05	1.28	2.56	2.45	2.45	3.51	3.74	3.76	5.51	7.26	6.96
TR1200_c0_g2	probable serine/threonine-protein kinase PBL16 isoform X1 [Carica papaya]	Probable serine/threonine-protein kinase PBL16 OS=Arabidopsis thaliana OX=3702 GN=PBL16 PE=1 SV=1	Protein tyrosine kinase;Protein kinase domain	-	-	-	-	-	3.35	2.42	2.39	5.54	5.56	6.31	9.57	7.67	8.49	2.25	2.44	2.77
TR1200_c0_g4	probable serine/threonine-protein kinase PBL16 isoform X1 [Carica papaya]	Probable serine/threonine-protein kinase PBL16 OS=Arabidopsis thaliana OX=3702 GN=PBL16 PE=1 SV=1	Protein tyrosine kinase;Protein kinase domain	-	-	-	-	-	0.46	0.46	1	1.82	2	1.62	2.01	2.24	2.27	5.26	3.98	4.12
TR1200_c3_g1	-	-	-	-	-	-	-	-	16.4	23.24	14.08	31.08	34.65	31.37	27.44	33.63	29.7	62.04	73.99	58.16
TR120056_c0_g2	-	-	-	-	-	-	-	-	0.81	0.29	0.09	0	0	0	0.14	0.05	0	0.06	0.03	0
TR12015_c0_g1	-	-	-	-	-	-	-	-	2.17	3.29	0	0.98	0	1.51	21.32	20.05	25.11	17	14.22	12.89
TR12018_c0_g1	thioredoxin H1 [Phalaenopsis equestris]	Thioredoxin H-type OS=Fagopyrum esculentum OX=3617 PE=3 SV=1	Thioredoxin	-	-	-	K03671|trxA; thioredoxin 1	ko04621(Organismal Systems)	123.32	125.09	119.94	64.21	67.07	70.81	145.48	156.63	154.52	89.91	89.81	87.17
TR12018_c1_g1	-	-	-	-	-	-	-	-	0.58	0.36	0.21	1.64	1.55	1.63	0.88	1	0.7	0.44	0.58	0.64
TR12018_c3_g1	PREDICTED: protein SODIUM POTASSIUM ROOT DEFECTIVE 2-like [Nelumbo nucifera]	Protein SODIUM POTASSIUM ROOT DEFECTIVE 2 OS=Arabidopsis thaliana OX=3702 GN=NAKR2 PE=2 SV=1	Heavy-metal-associated domain	-	-	-	-	-	0	0	0.09	0	0	0.09	0.99	0.92	0.93	0.33	0.48	0.89
TR12019_c0_g1	PREDICTED: uncharacterized protein LOC104608631 [Nelumbo nucifera]	-	-	-	-	-	-	-	0.44	0.31	0.8	0.61	0.49	0.57	2.17	2.45	2.77	0.71	0.47	0.54
TR120210_c0_g1	hypothetical protein A8B94_11150 [Bordetella pertussis]	-	-	-	-	-	-	-	60.46	43.47	373.23	19.64	9.05	14.46	54.06	26.68	101.73	10.85	12.93	10.94
TR12024_c0_g1	hypothetical protein [Homo sapiens]	Protein PIR OS=Arabidopsis thaliana OX=3702 GN=PIR PE=1 SV=2	Cytoplasmic Fragile-X interacting family	-	-	-	K05749|CYFIP; cytoplasmic FMR1 interacting protein	ko03013(Genetic Information Processing);ko04810(Cellular Processes)	1.32	0.37	0.39	0.01	0.07	0.05	0.32	0.2	0.07	0.06	0.03	0
TR120266_c0_g1	hypothetical protein CDL15_Pgr010527 [Punica granatum]	Leucine-rich repeat extensin-like protein 2 OS=Arabidopsis thaliana OX=3702 GN=LRX2 PE=2 SV=1	Leucine rich repeat;Leucine Rich repeats (2 copies)	-	-	-	-	-	0.1	0.06	0.07	1.18	0.68	1.21	0.7	0.48	0.5	0.5	0.75	0.73
TR120322_c0_g1	PREDICTED: serine carboxypeptidase-like 20 [Juglans regia]	Serine carboxypeptidase-like 20 OS=Arabidopsis thaliana OX=3702 GN=SCPL20 PE=2 SV=2	Serine carboxypeptidase	-	-	-	-	-	1.19	1.03	1.14	0.04	0.12	0.19	1.14	0.82	0.78	0.08	0.07	0
TR12036_c0_g1	-	-	-	-	-	-	-	-	1.34	0.83	0.66	0.91	1.21	1.18	0.06	0.29	0.12	0.07	0.21	0.07
TR12040_c0_g2	PREDICTED: cyclin-U2-1-like [Nelumbo nucifera]	Cyclin-U2-1 OS=Arabidopsis thaliana OX=3702 GN=CYCU2-1 PE=1 SV=1	Cyclin;Cyclin, N-terminal domain	-	-	-	-	-	2.73	2.62	2.15	0.48	0.75	0.96	0.19	0.4	0.1	0.18	0.09	0.18
TR12046_c1_g1	PREDICTED: probable plastid-lipid-associated protein 12, chloroplastic isoform X1 [Nelumbo nucifera]	Probable plastid-lipid-associated protein 12, chloroplastic OS=Arabidopsis thaliana OX=3702 GN=PAP12 PE=1 SV=1	-	-	-	-	-	-	2.21	3.19	3.92	1.11	1.07	1.17	1.07	1.5	1.58	2.51	2.54	2.59
TR12057_c1_g2	-	-	-	-	-	-	-	-	0.6	0.9	0.73	7.13	4.06	6.97	0.37	0.71	2.14	0.91	1.25	0.45
TR12071_c7_g2	Serine protease SPPA, chloroplastic [Vitis vinifera]	-	-	-	-	-	-	-	0.2	0	0	1.72	1.79	1.51	0.59	0.34	0.12	0.14	0.21	0.58
TR12072_c1_g1	hypothetical protein EUGRSUZ_A01497 [Eucalyptus grandis]	Bidirectional sugar transporter SWEET3 OS=Arabidopsis thaliana OX=3702 GN=SWEET3 PE=1 SV=1	Sugar efflux transporter for intercellular exchange	-	-	-	-	-	0.21	0	0.24	0.08	0	0.18	0.3	0.46	0	1.47	1.34	1.91
TR12072_c2_g1	-	-	-	-	-	-	-	-	0.06	0	0	1.29	0.98	1.28	0.25	0.69	0.34	0.31	0.51	0.36
TR12076_c0_g1	PREDICTED: uncharacterized protein LOC18606144 [Theobroma cacao]|EOY24160.1 Bifunctional inhibitor/lipid-transfer protein/seed storage 2S albumin superfamily protein [Theobroma cacao]	-	Probable lipid transfer	-	-	-	-	-	8.68	11.22	8.89	3.18	2.58	2.35	3.99	3.33	2.98	42.04	38.97	44.82
TR12077_c0_g2	hypothetical protein CAP31_13600 [Sulfuriferula sp. AH1]	-	-	-	-	-	-	-	8.15	3.02	6.19	0.38	0	0	0.56	0.81	12.11	0.68	0	2.91
TR12078_c0_g1	PREDICTED: uncharacterized protein LOC104597881 [Nelumbo nucifera]	-	Universal stress protein family	-	-	-	-	-	2.53	2.23	4.28	0.29	0.07	0.14	0.21	0.57	0.72	0.43	0.41	0.17
TR12083_c0_g2	PREDICTED: protein NRT1/ PTR FAMILY 7.3-like [Nelumbo nucifera]	Protein NRT1/ PTR FAMILY 7.3 OS=Arabidopsis thaliana OX=3702 GN=NPF7.3 PE=1 SV=2	POT family;Major Facilitator Superfamily	-	-	-	-	-	0.47	0.4	0.46	0.09	0.07	0.13	0.56	0.38	0.71	1.87	1.54	1.88
TR12087_c0_g1	hypothetical protein BVC80_1289g28 [Macleaya cordata]	HVA22-like protein i OS=Arabidopsis thaliana OX=3702 GN=HVA22I PE=2 SV=2	TB2/DP1, HVA22 family	-	-	-	-	-	4.44	4.69	4.5	9.19	9.64	8.93	8.84	8.91	10.06	8.59	9.17	9.03
TR12088_c0_g1	-	-	-	-	-	-	-	-	0.49	0.4	0	65.3	55.2	58.15	0.62	0.3	0.59	0.78	0.35	0
TR12094_c0_g2	-	-	-	-	-	-	-	-	0.89	0.71	1.25	0.22	0	0	2.69	2.15	2.65	0.13	0.06	0
TR12095_c0_g1	PREDICTED: probable histone H2A variant 3 [Nelumbo nucifera]|XP_010279306.1 PREDICTED: probable histone H2A variant 3 [Nelumbo nucifera]	Probable histone H2A variant 1 OS=Oryza sativa subsp. japonica OX=39947 GN=Os03g0162200 PE=2 SV=1	Core histone H2A/H2B/H3/H4;C-terminus of histone H2A	-	-	-	K11251|H2A; histone H2A	ko04217(Cellular Processes)	9.32	11.64	7.73	6.65	7.45	6.67	3.34	3.26	2.93	9.95	9.51	9.3
TR12099_c0_g1	putative membrane protein [Burkholderia sp. RPE67]|BAO87487.1 putative membrane protein [Burkholderia sp. RPE67]|BAO87598.1 putative membrane protein [Burkholderia sp. RPE67]	-	-	-	-	-	-	-	460.51	262.44	835.03	95.79	122.05	124.62	419.56	98.28	416.48	99.26	55.92	199.15
TR1210_c1_g1	Protein kinase domain [Macleaya cordata]	Putative cyclin-dependent kinase F-2 OS=Oryza sativa subsp. japonica OX=39947 GN=CDKF-2 PE=3 SV=1	Protein kinase domain;Protein tyrosine kinase	-	-	-	-	-	62.8	62.03	67.31	53.79	51.61	52.69	40.14	42.01	39.98	14.84	13.73	14.6
TR12103_c0_g1	Cytochrome c-like domain containing protein [Parasponia andersonii]	Cytochrome c6, chloroplastic OS=Arabidopsis thaliana OX=3702 GN=PETJ PE=1 SV=1	Cytochrome C oxidase, cbb3-type, subunit III	-	-	-	K08906|petJ; cytochrome c6	ko00195(Metabolism)	4.96	5.14	4.63	1.95	2	2.12	1.63	1.34	1.56	1.93	1.86	1.63
TR12104_c0_g1	-	-	-	-	-	-	-	-	0.4	0	0.09	1.51	0.89	1.38	0	0.18	0.19	0.69	0.22	0.11
TR1211_c0_g1	-	-	-	-	-	-	-	-	110.97	111.13	107.16	32.46	32.89	32.92	26.63	26.82	28.37	9.73	11.77	9.52
TR1211_c0_g2	-	-	-	-	-	-	-	-	0.12	0.12	0.15	0.92	0.14	0.72	4.91	5.87	6.93	3.76	3.63	2.51
TR121102_c0_g1	Retrovirus-related Pol polyprotein from transposon RE1 [Vitis vinifera]	Retrovirus-related Pol polyprotein from transposon RE1 OS=Arabidopsis thaliana OX=3702 GN=RE1 PE=2 SV=1	Reverse transcriptase (RNA-dependent DNA polymerase);gag-polypeptide of LTR copia-type;Retrotransposon gag protein;GAG-pre-integrase domain	-	-	-	-	-	0.01	0.03	0	0.54	0.55	0.58	0.03	0.01	0.01	0.16	0.18	0.18
TR121102_c0_g2	Retrovirus-related Pol polyprotein from transposon TNT 1-94 [Vitis vinifera]	Retrovirus-related Pol polyprotein from transposon RE1 OS=Arabidopsis thaliana OX=3702 GN=RE1 PE=2 SV=1	Integrase core domain;GAG-pre-integrase domain	-	-	-	-	-	0	0	0.06	0.38	0.44	0.41	0	0	0	0	0.07	0.09
TR12117_c1_g2	cytochrome c oxidase subunit NDUFA4 [Vulpes vulpes]	-	-	metabolic process;biological_process;localization;establishment of localization;transport;oxidation-reduction process	electron transfer activity;molecular_function;catalytic activity;transporter activity;transmembrane transporter activity;oxidoreductase activity;cation transmembrane transporter activity;heme-copper terminal oxidase activity;ion transmembrane transporter activity;monovalent inorganic cation transmembrane transporter activity;proton transmembrane transporter activity;inorganic molecular entity tra…	intracellular;cellular_component;membrane;mitochondrion;extracellular region;extracellular space;cell;cytoplasm;mitochondrial envelope;mitochondrial inner membrane;mitochondrial respiratory chain;intracellular membrane-bounded organelle;organelle inner membrane;NADH dehydrogenase complex;organelle membrane;mitochondrial membrane;organelle envelope;envelope;vesicle;protein-containing complex;organ…	-	-	1.12	0.65	1.3	0.14	0.13	0	0.54	0.46	0.7	0.08	0.16	0
TR1212_c1_g1	phosphoenolpyruvate carboxykinase (ATP)-like isoform X1 [Camellia sinensis]	Phosphoenolpyruvate carboxykinase (ATP) OS=Cucumis sativus OX=3659 GN=PCK PE=2 SV=1	Phosphoenolpyruvate carboxykinase;Phosphoenolpyruvate carboxykinase	-	-	-	-	-	14.56	14.74	15.97	16.08	17.82	15.58	8.81	8.97	8.2	24.81	26.15	25.5
TR121204_c0_g2	PREDICTED: spectrin beta chain, non-erythrocytic 2 isoform X1 [Mus musculus]	-	Spectrin repeat;Pleckstrin homology domain;PH domain	multicellular organism development;nervous system development;biological_process;cellular process;cellular component assembly;cellular component organization;multicellular organismal process;developmental process;cellular component biogenesis;system development;anatomical structure development;synapse organization;cellular component organization or biogenesis;behavior;regulation of neurotransmitt…	protein binding;molecular_function;cell adhesion molecule binding;cell adhesion mediator activity;binding;cadherin binding;cell-cell adhesion mediator activity;cadherin binding involved in cell-cell adhesion	plasma membrane;intracellular;cellular_component;membrane;extracellular region;cell;cytoplasm;intracellular membrane-bounded organelle;Golgi apparatus;transport vesicle;cytoskeleton;cell-cell junction;adherens junction;cell cortex;endomembrane system;actin cytoskeleton;cell junction;cortical cytoskeleton;cortical actin cytoskeleton;organelle membrane;cytoplasmic vesicle;vesicle;organelle subcompa…	-	-	1.18	0.32	0.46	0.06	0.09	0.09	0.26	0.12	0.08	0.06	0.02	0.05
TR12123_c0_g1	hypothetical protein AQUCO_02700328v1 [Aquilegia coerulea]	-	-	-	-	-	-	-	20.44	17.14	21.42	26.34	26.03	26.29	6.52	7.07	7.29	6.31	6.65	6.38
TR12126_c1_g1	unnamed protein product [Macaca fascicularis]	-	-	-	-	-	-	-	27.51	7.21	9.42	1.43	1.04	4	1.54	1.47	0.74	1.42	0.65	0.95
TR12127_c0_g1	PREDICTED: inorganic pyrophosphatase 1-like [Prunus mume]	Inorganic pyrophosphatase 2 OS=Arabidopsis thaliana OX=3702 GN=At1g17710 PE=2 SV=1	Putative Phosphatase	-	-	-	-	-	3.65	1.71	3.03	2.6	2.23	2.73	21.01	19.97	18.33	2.43	1.62	1.28
TR121276_c0_g1	-	-	-	-	-	-	-	-	122.99	112.43	118.11	5757.21	5580.58	5296.27	4629.95	5143.2	4982.07	1161.86	1356.66	1208.12
TR12128_c0_g2	IQ motif [Macleaya cordata]	Myosin-2 OS=Arabidopsis thaliana OX=3702 GN=VIII-2 PE=2 SV=1	Myosin head (motor domain);IQ calmodulin-binding motif	-	-	-	-	-	0.12	0.06	0.22	0.06	0.1	0.09	0.74	0.59	0.48	0.38	0.22	0.38
TR1213_c0_g1	PREDICTED: CLP protease regulatory subunit CLPX1, mitochondrial [Nelumbo nucifera]	CLP protease regulatory subunit CLPX3, mitochondrial OS=Arabidopsis thaliana OX=3702 GN=CLPX3 PE=2 SV=1	-	-	-	-	-	-	2.01	2.37	2.09	5.04	5.1	4.66	3.16	2.92	3.4	3.07	2.87	2.8
TR12137_c0_g1	-	-	-	-	-	-	-	-	6.25	5.84	8.1	5.44	4.15	6.8	13.71	13.36	18.38	2.99	3.85	1.11
TR1214_c2_g1	hypothetical protein BVC80_1835g416 [Macleaya cordata]	Glucomannan 4-beta-mannosyltransferase 1 OS=Cyamopsis tetragonoloba OX=3832 GN=ManS PE=1 SV=1	Glycosyltransferase like family 2;Glycosyl transferase family group 2;Glycosyl transferase family 2;Glycosyl transferase family 21;Histidyl-tRNA synthetase;Anticodon binding domain	-	-	-	-	-	6.59	6.83	6.32	5.3	5.44	5.22	19.52	20.06	19.68	9.33	8.86	8.92
TR12142_c0_g1	PREDICTED: protein CHROMATIN REMODELING 25 [Nelumbo nucifera]	Protein CHROMATIN REMODELING 25 OS=Arabidopsis thaliana OX=3702 GN=CHR25 PE=1 SV=1	SNF2 family N-terminal domain;Type III restriction enzyme, res subunit;Helicase conserved C-terminal domain	-	-	-	K10875|RAD54L, RAD54; DNA repair and recombination protein RAD54 and RAD54-like protein [EC:3.6.4.-]	ko03440(Genetic Information Processing)	0.47	0.21	0.3	0.38	0.25	0.41	0.49	0.56	0.47	0.92	1.14	1.36
TR12150_c0_g1	-	-	-	-	-	-	-	-	112.06	115.31	100.2	72.73	83.97	75.77	40.32	47.13	40.04	17.23	14.06	16.89
TR12151_c0_g1	PREDICTED: cyclin-P3-1-like isoform X1 [Nelumbo nucifera]	Cyclin-P3-1 OS=Oryza sativa subsp. japonica OX=39947 GN=CYCP3-1 PE=3 SV=1	Cyclin;Cyclin, N-terminal domain	-	-	-	-	-	52.98	54.66	57.88	73.97	72.4	73.38	63.31	63.18	64.62	25.09	26.81	26.37
TR12152_c0_g1	uncharacterized protein LOC113309550 isoform X1 [Papaver somniferum]|RZC76837.1 hypothetical protein C5167_000957 [Papaver somniferum]	-	-	-	-	-	-	-	2.94	13.9	9.26	0	0	0	17.94	16.81	13.5	0	0.73	1.62
TR12156_c1_g2	-	-	-	-	-	-	-	-	0.24	0.08	0.28	0.39	0.18	0.09	0.23	0.29	0.29	1.72	2.37	2.53
TR12157_c0_g1	unnamed protein product, partial [Vitis vinifera]	-	-	-	-	-	-	-	3.69	3.93	4.5	13.86	11.19	13.49	25.5	25.52	26.45	17.83	16.58	16.7
TR121590_c0_g1	nuclear transcription factor Y subunit B-6-like [Durio zibethinus]	Nuclear transcription factor Y subunit B-6 OS=Arabidopsis thaliana OX=3702 GN=NFYB6 PE=1 SV=2	Histone-like transcription factor (CBF/NF-Y) and archaeal histone;Core histone H2A/H2B/H3/H4	-	-	-	-	-	0	0.08	0	0	0	0	1.74	1.18	1.16	0	0	0.11
TR121659_c0_g2	hypothetical protein BVC80_9087g82 [Macleaya cordata]	-	-	-	-	-	-	-	0.58	1.37	0.59	0.13	0.13	0.13	0.36	0.17	0.14	0.55	0.48	0.33
TR12167_c0_g1	-	-	-	-	-	-	-	-	32.08	28.64	31.59	6.23	7.51	6.62	14.71	13.53	19.27	2.9	3.44	2.56
TR12169_c1_g1	-	-	-	-	-	-	-	-	0	0.32	0	0.09	0	0.37	1.85	2.44	2.01	0	0.14	0
TR12175_c0_g1	PREDICTED: protein ROOT PRIMORDIUM DEFECTIVE 1 [Nelumbo nucifera]	Protein WHAT&apos	Plant organelle RNA recognition domain	-	-	-	-	-	0.71	0.73	0.66	1.42	1.57	1.57	1.67	1.16	1.28	1.48	1.43	1.04
TR12177_c0_g2	PREDICTED: beta-arrestin-2 isoform X2 [Macaca mulatta]	-	Arrestin (or S-antigen), N-terminal domain;Arrestin (or S-antigen), C-terminal domain	-	-	-	-	-	1.6	0.33	0.24	0.02	0.07	0.07	0.34	0.08	0.11	0	0.02	0
TR1218_c0_g1	-	-	-	-	-	-	-	-	2.49	0.91	1.37	2.87	2.82	1.97	4.42	4.14	4.61	28.88	39.65	32.42
TR1218_c1_g1	hypothetical protein AQUCO_00300899v1 [Aquilegia coerulea]	Auxin response factor 2B OS=Solanum lycopersicum OX=4081 GN=ARF2B PE=2 SV=1	Auxin response factor;B3 DNA binding domain;AUX/IAA family	-	-	-	-	-	0.09	0.24	0.06	0.09	0.08	0.02	2.5	2.15	1.91	0.18	0.25	0.42
TR12181_c0_g1	S-adenosylmethionine synthase isoform type-1 [Rattus norvegicus]|1QM4_A Chain A, Methionine Adenosyltransferase Complexed with a L-Methionine Analogue|1QM4_B Chain B, Methionine Adenosyltransferase Complexed with a L-Methionine Analogue|1O90_A Chain A, Methionine Adenosyltransferase complexed with a L-methionine analogue|1O90_B Chain B, Methionine Adenosyltransferase complexed with a L-methionine…	S-adenosylmethionine synthase 2 OS=Catharanthus roseus OX=4058 GN=SAMS2 PE=1 SV=1	S-adenosylmethionine synthetase, C-terminal domain;S-adenosylmethionine synthetase, central domain;S-adenosylmethionine synthetase, N-terminal domain	sulfur compound metabolic process;metabolic process;coenzyme metabolic process;biological_process;biosynthetic process;coenzyme biosynthetic process;cellular process;drug metabolic process;cellular metabolic process;cellular biosynthetic process;sulfur compound biosynthetic process;S-adenosylmethionine metabolic process;cofactor metabolic process;cofactor biosynthetic process;organic substance me…	molecular_function;binding;metal ion binding;ion binding;cation binding;catalytic activity;transferase activity;transferase activity, transferring alkyl or aryl (other than methyl) groups;nucleotide binding;drug binding;purine nucleotide binding;adenyl nucleotide binding;ribonucleotide binding;purine ribonucleotide binding;adenyl ribonucleotide binding;purine ribonucleoside triphosphate binding;s…	intracellular;cellular_component;cell;nucleus;cytoplasm;intracellular membrane-bounded organelle;membrane-enclosed lumen;nuclear lumen;nuclear periphery;organelle;membrane-bounded organelle;intracellular organelle;organelle lumen;organelle part;intracellular part;nuclear part;cytoplasmic part;intracellular organelle part;cell part;intracellular organelle lumen;cytosol;nuclear matrix	K00789|metK; S-adenosylmethionine synthetase [EC:2.5.1.6]	ko00270(Metabolism);ko01100(Metabolism);ko01110(Metabolism);ko01230(Metabolism)	2.83	0.79	0.75	0.25	0.14	0.18	0.47	0.45	0.48	0.06	0.07	0.06
TR12181_c1_g1	S-adenosylmethionine synthase 5 [Cinnamomum micranthum f. kanehirae]	S-adenosylmethionine synthase OS=Phaseolus lunatus OX=3884 GN=SAMS PE=2 SV=1	-	-	-	-	-	-	30.67	45.26	21.1	12.3	23.73	8.61	11.56	7.4	12.98	133.96	131.37	136.59
TR12182_c0_g1	meningioma-expressed antigen 5s splice variant [Homo sapiens]|EAW49743.1 meningioma expressed antigen 5 (hyaluronidase), isoform CRA_b [Homo sapiens]	-	beta-N-acetylglucosaminidase	-	-	-	-	-	1.2	0.48	0.42	0.12	0.06	0.26	0.33	0.17	0.07	0.05	0.04	0.11
TR12182_c0_g2	MGEA5, partial [Cricetulus griseus]	-	-	-	-	-	-	-	0.68	0.22	0.27	0.05	0.05	0.07	0.11	0.09	0.11	0	0.01	0.02
TR12184_c0_g1	AP2/ERF domain [Macleaya cordata]	Ethylene-responsive transcription factor ERF061 OS=Arabidopsis thaliana OX=3702 GN=ERF061 PE=2 SV=1	AP2 domain	-	-	-	-	-	8.27	8.95	8.84	7.46	8.6	7.88	1.57	1.65	1.63	2.24	2.08	2.4
TR12186_c1_g1	tumor necrosis factor alpha-induced protein 3 isoform X1 [Theropithecus gelada]	-	A20-like zinc finger;OTU-like cysteine protease	-	-	-	-	-	2.73	0.74	0.63	0.06	0.17	0.12	0.3	0.31	0.1	0.07	0.07	0.1
TR12188_c0_g1	ras-related protein Rab-7a [Homo sapiens]|NP_033031.2 ras-related protein Rab-7a [Mus musculus]|NP_001280584.1 ras-related protein Rab-7a [Mus musculus]|NP_001280582.1 ras-related protein Rab-7a [Mus musculus]|NP_001280583.1 ras-related protein Rab-7a [Mus musculus]|NP_001280581.1 ras-related protein Rab-7a [Mus musculus]|XP_001366922.1 PREDICTED: ras-related protein Rab-7a [Monodelphis domestica…	Ras-related protein Rab7 OS=Gossypium hirsutum OX=3635 GN=RAB7 PE=2 SV=1	Ras family;Ras of Complex, Roc, domain of DAPkinase;ADP-ribosylation factor family;50S ribosome-binding GTPase;RsgA GTPase;Gtr1/RagA G protein conserved region	-	-	-	K07897|RAB7A; Ras-related protein Rab-7A	ko04137(Cellular Processes);ko04138(Cellular Processes);ko04140(Cellular Processes);ko04144(Cellular Processes);ko04145(Cellular Processes)	2.74	0.73	0.84	0.24	0.19	0.34	0.69	0.47	0.1	0.3	0.2	0.06
TR1219_c0_g1	G-type lectin S-receptor-like serine/threonine-protein kinase LECRK3 [Camellia sinensis]	G-type lectin S-receptor-like serine/threonine-protein kinase LECRK1 OS=Oryza sativa subsp. indica OX=39946 GN=LECRK1 PE=1 SV=2	-	-	-	-	-	-	6.19	6.8	7.34	7.64	7.01	7.35	12.03	12.34	10.73	3.47	2.28	3.63
TR1219_c0_g2	PREDICTED: G-type lectin S-receptor-like serine/threonine-protein kinase LECRK1 [Nelumbo nucifera]	G-type lectin S-receptor-like serine/threonine-protein kinase RLK1 OS=Arabidopsis thaliana OX=3702 GN=RLK1 PE=2 SV=2	Protein kinase domain;Protein tyrosine kinase	-	-	-	-	-	8.65	8.82	7.46	6.61	8.87	7.83	11.89	10.08	12.35	2.83	3.31	2.42
TR1219_c2_g1	Peptidase A1 [Macleaya cordata]	Aspartic proteinase CDR1 OS=Arabidopsis thaliana OX=3702 GN=CDR1 PE=1 SV=1	Xylanase inhibitor N-terminal;Xylanase inhibitor C-terminal;Eukaryotic aspartyl protease	-	-	-	-	-	30.24	27.98	29.16	5.86	6.16	6.21	36.26	34.58	36.64	14.9	11.69	14.2
TR121934_c0_g2	polyadenylate-binding protein-interacting protein 2 [Homo sapiens]|NP_001028284.1 polyadenylate-binding protein-interacting protein 2 [Homo sapiens]|XP_011541730.1 polyadenylate-binding protein-interacting protein 2 isoform X1 [Homo sapiens]|XP_016865011.1 polyadenylate-binding protein-interacting protein 2 isoform X1 [Homo sapiens]|XP_016865012.1 polyadenylate-binding protein-interacting protein…	-	Ataxin-2 C-terminal region	reproduction;gamete generation;biological_process;sexual reproduction;reproductive process;multicellular organismal process;multicellular organism reproduction;multi-organism reproductive process;male gamete generation;multicellular organismal reproductive process;multi-organism process;system process;nervous system process;behavior;learning or memory;cognition;metabolic process;translation;trans…	molecular_function;binding;nucleic acid binding;RNA binding;organic cyclic compound binding;heterocyclic compound binding;translation regulator activity;translation repressor activity;mRNA binding;protein binding	intracellular;cellular_component;cell;intracellular part;cell part;cytoplasm	-	-	2.76	0.62	0.76	0.29	0.2	0.21	0.38	0.54	0.39	0.1	0.05	0.1
TR12196_c0_g1	putative RNA-directed DNA polymerase [Medicago truncatula]	Retrovirus-related Pol polyprotein from transposon RE2 OS=Arabidopsis thaliana OX=3702 GN=RE2 PE=4 SV=1	-	-	-	-	-	-	0.42	0.59	0.48	0.42	0.21	0.21	0.81	0.74	1.13	0.65	0.33	0.24
TR12204_c0_g1	-	-	-	-	-	-	-	-	0.07	0.07	0.16	0.94	1.22	1.09	0	0.19	0	0.39	0.41	0.59
TR12210_c2_g1	-	-	-	-	-	-	-	-	0	0.2	0	0.08	0	0	1.18	1.84	2.24	0.28	0.81	0.43
TR12210_c3_g1	PREDICTED: vacuolar amino acid transporter 1 [Prunus mume]|XP_016649068.1 PREDICTED: vacuolar amino acid transporter 1 [Prunus mume]	Amino acid transporter AVT1I OS=Arabidopsis thaliana OX=3702 GN=AVT1I PE=3 SV=1	Transmembrane amino acid transporter protein	-	-	-	K15015|SLC32A, VGAT; solute carrier family 32 (vesicular inhibitory amino acid transporter)	ko04721(Organismal Systems);ko04723(Organismal Systems);ko04727(Organismal Systems)	7.05	6.42	4.11	0.13	0.27	0.25	0.73	0.83	0.66	0.07	0	0
TR12210_c3_g2	PREDICTED: amino acid transporter ANTL1-like isoform X1 [Nelumbo nucifera]	Amino acid transporter AVT1I OS=Arabidopsis thaliana OX=3702 GN=AVT1I PE=3 SV=1	Transmembrane amino acid transporter protein;Transmembrane amino acid transporter protein	-	-	-	K15015|SLC32A, VGAT; solute carrier family 32 (vesicular inhibitory amino acid transporter)	ko04721(Organismal Systems);ko04723(Organismal Systems);ko04727(Organismal Systems)	17.63	18.1	18.62	0.69	0.84	0.61	1.46	1.46	1.87	0.13	0.1	0.28
TR122100_c0_g1	reticulon-4 isoform D [Mus musculus]|AAM73502.1 RTN4 [Mus musculus]|AAM73507.1 RTN4 [Mus musculus]	-	-	blood vessel development;vasculature development;multicellular organism development;anatomical structure morphogenesis;biological_process;anatomical structure formation involved in morphogenesis;multicellular organismal process;developmental process;tube morphogenesis;tube development;blood vessel morphogenesis;system development;anatomical structure development;cardiovascular system development;…	protein binding;molecular_function;cell adhesion molecule binding;cell adhesion mediator activity;binding;cadherin binding;cell-cell adhesion mediator activity;cadherin binding involved in cell-cell adhesion	intracellular;cellular_component;integral component of membrane;membrane;extracellular region;extracellular space;cell;nucleus;cytoplasm;endoplasmic reticulum;endoplasmic reticulum membrane;intracellular membrane-bounded organelle;cell-cell junction;adherens junction;endomembrane system;cell junction;intrinsic component of membrane;intrinsic component of endoplasmic reticulum membrane;organelle e…	-	-	1.12	0.27	0.22	0	0	0.04	0.04	0.02	0	0.05	0	0.05
TR12220_c0_g2	PREDICTED: inositol-tetrakisphosphate 1-kinase 3-like isoform X1 [Nelumbo nucifera]	Inositol-tetrakisphosphate 1-kinase 3 OS=Arabidopsis thaliana OX=3702 GN=ITPK3 PE=1 SV=2	Inositol 1, 3, 4-trisphosphate 5/6-kinase	-	-	-	K00913|ITPK1; inositol-1,3,4-trisphosphate 5/6-kinase / inositol-tetrakisphosphate 1-kinase [EC:2.7.1.159 2.7.1.134]	ko00562(Metabolism);ko01100(Metabolism);ko04070(Environmental Information Processing)	2.79	2.9	3.31	2.07	2.59	2.45	4.65	4.63	5.91	0.98	1.29	1.15
TR12221_c0_g1	hypothetical protein JS55_02525 [Rickettsia felis str. LSU]	-	-	-	-	-	-	-	1.38	3.4	0	0	0.16	0.17	2.41	0.2	6.9	0	0	0
TR12226_c0_g1	PREDICTED: cytochrome P450 94C1-like [Nelumbo nucifera]	Cytochrome P450 94C1 OS=Arabidopsis thaliana OX=3702 GN=CYP94C1 PE=1 SV=1	Cytochrome P450	-	-	-	-	-	0.18	0.05	0.31	0.02	0	0	0.82	0.86	0.44	0	0	0
TR12228_c0_g1	hypothetical protein DHEL01_v210924 [Diaporthe helianthi]	-	Glucose-repressible protein Grg1	-	-	-	-	-	4.42	4.45	2.66	0.34	0.45	0.48	0	0	0.24	0.3	0	0
TR1223_c1_g1	PREDICTED: pentatricopeptide repeat-containing protein At5g65560-like isoform X1 [Nelumbo nucifera]|XP_010270185.1 PREDICTED: pentatricopeptide repeat-containing protein At5g65560-like isoform X1 [Nelumbo nucifera]|XP_010270187.1 PREDICTED: pentatricopeptide repeat-containing protein At5g65560-like isoform X1 [Nelumbo nucifera]	Probable serine/threonine-protein kinase PBL28 OS=Arabidopsis thaliana OX=3702 GN=PBL28 PE=2 SV=1	PPR repeat family;PPR repeat;PPR repeat;Pentatricopeptide repeat domain;Pentacotripeptide-repeat region of PRORP;Mitochondrial ATPase expression;Tetratricopeptide repeat;Mitochondrial 28S ribosomal protein S27;Tetratricopeptide repeat;Rab-GTPase-TBC domain	-	-	-	-	-	2.04	2.12	1.94	2	1.87	2.21	1.63	1.49	1.53	0.68	0.56	0.48
TR1223_c5_g1	-	-	-	-	-	-	-	-	2.2	3.56	2.44	0.3	0.55	0.28	0.87	0.97	1.02	4.24	1.85	1.95
TR12230_c0_g1	hypothetical protein Ahy_B02g060777 isoform A [Arachis hypogaea]	NADPH-dependent aldo-keto reductase, chloroplastic OS=Arabidopsis thaliana OX=3702 GN=AKR4C9 PE=1 SV=1	-	-	-	-	-	-	23.61	23.79	21.78	5.43	7.6	8.43	9.55	11.78	9.98	0.65	6.18	3.19
TR12232_c0_g1	PREDICTED: 17.5 kDa class I heat shock protein-like [Populus euphratica]	17.5 kDa class I heat shock protein OS=Glycine max OX=3847 GN=HSP17.5-M PE=3 SV=1	-	-	-	-	-	-	51.23	50.02	43.22	18.5	19.53	14.04	13.75	14.13	17.19	1.9	2.81	2.98
TR122354_c0_g1	-	-	-	-	-	-	-	-	380.83	346.36	430.52	395.35	435.39	414.31	61.22	55.07	66.38	23.07	17.74	23.42
TR12239_c0_g1	Protein of unknown function UPF0301 [Macleaya cordata]	-	-	-	-	-	-	-	297.86	262.62	280.65	223.29	222.24	205.18	98.71	107.33	111.26	103.6	115.57	102.08
TR12242_c0_g1	hypothetical protein AQUCO_01300550v1 [Aquilegia coerulea]	Protein TPX2 OS=Arabidopsis thaliana OX=3702 GN=TPX2 PE=1 SV=1	Cell cycle regulated microtubule associated protein	-	-	-	-	-	1.18	1.52	1.84	1.68	2.16	1.98	0.79	0.78	0.94	0.86	1.2	0.84
TR122489_c0_g1	kinesin-like protein KIF13A isoform d [Homo sapiens]|XP_001170727.1 kinesin-like protein KIF13A isoform X12 [Pan troglodytes]|CAC20443.1 KINESIN-13A2 [Homo sapiens]|PNI62727.1 KIF13A isoform 7 [Pan troglodytes]	Kinesin-like protein KIN-8A OS=Oryza sativa subsp. japonica OX=39947 GN=KIN8A PE=3 SV=3	Kinesin motor domain	cell cycle;biological_process;cellular process;cell cycle process;cell division;protein localization;transport;protein transport;peptide transport;macromolecule localization;cellular protein localization;amide transport;establishment of protein localization;intracellular transport;localization;establishment of localization;cellular localization;establishment of localization in cell;cellular macro…	molecular_function;motor activity;catalytic activity;nucleoside-triphosphatase activity;pyrophosphatase activity;hydrolase activity;hydrolase activity, acting on acid anhydrides;hydrolase activity, acting on acid anhydrides, in phosphorus-containing anhydrides;nucleotide binding;binding;drug binding;purine nucleotide binding;adenyl nucleotide binding;ribonucleotide binding;purine ribonucleotide b…	intracellular;cellular_component;membrane;cell;cytoplasm;endosome;microtubule organizing center;cytoskeleton;microtubule associated complex;endomembrane system;microtubule cytoskeleton;organelle membrane;cytoplasmic vesicle;vesicle;protein-containing complex;organelle;membrane-bounded organelle;non-membrane-bounded organelle;intracellular organelle;intracellular non-membrane-bounded organelle;org…	-	-	18.4	20.17	9.6	4.68	2.02	3.47	6.8	7.06	6.13	2.82	2.52	2
TR1225_c0_g1	Uncharacterized protein TCM_042836 [Theobroma cacao]	Zinc finger protein ZAT5 OS=Arabidopsis thaliana OX=3702 GN=ZAT5 PE=2 SV=1	C2H2-type zinc finger;C2H2-type zinc finger	-	-	-	-	-	5.57	5.28	5.09	18.26	17.98	19.4	19.87	21.92	23.81	46.03	47.04	41.18
TR12254_c0_g1	hypothetical protein TSTA_040370 [Talaromyces stipitatus ATCC 10500]|EED14557.1 hypothetical protein TSTA_040370 [Talaromyces stipitatus ATCC 10500]	-	-	-	-	-	-	-	87.96	10.85	12.05	0	0.83	0.96	4.81	0	0.88	1.17	0	0
TR12267_c0_g1	-	Probable anion transporter 2, chloroplastic OS=Oryza sativa subsp. japonica OX=39947 GN=PHT4	-	-	-	-	-	-	1.48	1.2	1.38	0.53	0.82	0.79	1.37	1.14	1.57	0.12	0.25	0.18
TR12268_c0_g1	-	-	Leucine rich repeat;Leucine Rich repeats (2 copies);Leucine Rich repeat	-	-	-	-	-	8.48	6.82	6.37	3.99	3.97	4.92	10.18	8.78	10.75	10.29	8.68	8.07
TR1227_c0_g1	calcium-transporting ATPase 4, plasma membrane-type-like [Camellia sinensis]	Calcium-transporting ATPase 4, plasma membrane-type OS=Arabidopsis thaliana OX=3702 GN=ACA4 PE=1 SV=1	-	-	-	-	-	-	58.27	62.65	58.47	33.75	33.21	33.53	18.92	19.26	19.87	7.35	8	8.2
TR12273_c0_g1	-	-	-	-	-	-	-	-	16.15	10.61	17.35	15.83	21.37	20.97	6.87	6.91	9	26.38	27.62	28
TR12275_c0_g1	-	-	-	-	-	-	-	-	1.13	0.67	0.66	0.42	0.46	0.65	1.13	2.01	1.97	0.22	0.32	0
TR12286_c0_g1	-	-	-	-	-	-	-	-	0.05	0	0	0	0	0.06	0.29	0.31	0.37	3.26	3.06	3.49
TR1229_c0_g1	probable plastid-lipid-associated protein 4, chloroplastic isoform X1 [Jatropha curcas]	Probable plastid-lipid-associated protein 4, chloroplastic OS=Arabidopsis thaliana OX=3702 GN=PAP4 PE=1 SV=1	PAP_fibrillin	-	-	-	-	-	1.86	1.58	2.51	2.67	2.68	2.68	1.98	1.69	2.23	3.76	3.65	4.13
TR12301_c0_g1	uncharacterized protein LOC112169754 [Rosa chinensis]	-	-	-	-	-	-	-	0	0.07	0.06	0.08	0.11	0.14	0.23	0.23	0.09	1.15	1.08	1.16
TR1231_c10_g1	-	-	-	-	-	-	-	-	67.2	54.83	60.12	208.56	181.8	196.36	191.46	188.11	193.43	104.02	96.31	114.45
TR1231_c8_g1	ethylene-responsive transcription factor 2-like [Abrus precatorius]	Ethylene-responsive transcription factor 1A OS=Arabidopsis thaliana OX=3702 GN=ERF1A PE=1 SV=2	AP2 domain	-	-	-	-	-	36.94	43.2	40.71	16.47	14.72	15.81	16.24	14.22	14.8	12.27	9.13	12.43
TR12312_c0_g1	PREDICTED: astrocytic phosphoprotein PEA-15 [Camelus dromedarius]	-	Death effector domain	-	-	-	-	-	1.89	0.49	0.91	0.11	0.15	0.23	0.37	0.18	0.06	0.13	0.05	0.07
TR12317_c0_g1	-	-	-	-	-	-	-	-	2.25	2.58	2.62	1.52	2.15	1.25	7.73	6.07	5.6	2.92	3.55	2.76
TR12322_c0_g1	-	-	-	-	-	-	-	-	0	0.15	0	0.25	0	0	4.51	4.62	6.17	0.22	0.52	0
TR123308_c2_g1	-	-	-	-	-	-	-	-	0	0.36	0	11.61	6.46	14.15	3.57	4.31	4.24	2.19	5.73	4.85
TR12335_c0_g1	-	-	-	-	-	-	-	-	37.3	39.01	35.52	27.77	29.37	31.17	31.01	39.91	52.99	1.11	1.94	1.06
TR12337_c0_g1	-	-	-	-	-	-	-	-	0	0.2	0.24	0.17	0.46	1.21	6.84	6.84	6.52	0.3	0.42	0.9
TR12342_c0_g1	-	-	-	-	-	-	-	-	72.68	75.3	77.99	42.14	39.74	35.76	145.79	159.85	149.4	87.42	141.68	74.59
TR12344_c0_g1	PREDICTED: 3-phosphoinositide-dependent protein kinase 2-like [Nelumbo nucifera]	3-phosphoinositide-dependent protein kinase 2 OS=Arabidopsis thaliana OX=3702 GN=PDPK2 PE=1 SV=1	Protein kinase domain	-	-	-	-	-	2.89	2.29	3.07	8.34	8.38	6.28	2.72	5.08	4.37	6.45	5.88	5.11
TR12346_c0_g1	-	-	-	-	-	-	-	-	1.91	1.05	1.68	0.23	0.85	0.33	2.79	2.75	3.88	1.1	0.85	0.82
TR123480_c0_g1	hypothetical protein C1645_794897 [Glomus cerebriforme]	-	-	-	-	-	-	-	78.83	76.68	54.75	59.94	74.69	62.7	39.48	31.91	31.58	36.01	32.36	41.82
TR1235_c0_g1	Hypothetical protein DKFZp686J01190 variant, partial [Homo sapiens]	DEAD-box ATP-dependent RNA helicase 20 OS=Arabidopsis thaliana OX=3702 GN=RH20 PE=2 SV=1	DEAD/DEAH box helicase;P68HR (NUC004) repeat	-	-	-	-	-	10.09	2.47	2.61	0.73	0.65	0.83	1.91	1.26	0.74	0.58	0.24	0.4
TR12352_c0_g1	hypothetical protein BVC80_521g128 [Macleaya cordata]	Beta-amyrin synthase OS=Betula platyphylla OX=78630 GN=OSCBPY PE=1 SV=1	-	-	-	-	-	-	14.61	20.97	17.11	8.05	3.9	9.43	3.5	4.47	7.22	5	5.43	6.3
TR12356_c0_g1	FAS1 domain [Macleaya cordata]	Fasciclin-like arabinogalactan protein 1 OS=Arabidopsis thaliana OX=3702 GN=FLA1 PE=1 SV=1	Fasciclin domain	-	-	-	-	-	1.73	2.24	3	0.89	0.83	0.62	1.04	0.78	0.56	0.83	1.04	1
TR12358_c0_g1	hypothetical protein CFOL_v3_10319 [Cephalotus follicularis]	-	-	-	-	-	-	-	4.14	3.09	4.13	2.91	2.7	2.83	3.16	3.17	3.83	0.96	0.49	0.55
TR12373_c0_g1	hypothetical protein GW17_00009350 [Ensete ventricosum]	Dynamin-2A OS=Arabidopsis thaliana OX=3702 GN=DRP2A PE=1 SV=2	-	-	-	-	-	-	1.42	2.44	2.05	3.7	2.56	2.17	4.39	4.39	4.69	1.54	1.62	1.26
TR12377_c0_g1	perakine reductase-like [Quercus suber]	Probable aldo-keto reductase 1 OS=Glycine max OX=3847 GN=AKR1 PE=2 SV=1	Aldo/keto reductase family	-	-	-	-	-	0.08	0.17	0.1	0.84	0.73	0.99	0.76	0.64	0.44	0.52	0.67	0.88
TR1238_c1_g1	probable chalcone--flavonone isomerase 3 [Durio zibethinus]	Probable chalcone--flavonone isomerase 3 OS=Arabidopsis thaliana OX=3702 GN=CHI3 PE=1 SV=1	Chalcone-flavanone isomerase	-	-	-	-	-	23.7	24.62	24.19	21.68	22.19	23.04	10.26	10.6	10.82	15.45	16.38	16.19
TR1238_c3_g1	-	Syntaxin-22 OS=Arabidopsis thaliana OX=3702 GN=SYP22 PE=1 SV=1	-	-	-	-	-	-	0	1.04	0.18	2.95	3.17	2.97	0.35	0.77	0.89	0.43	0.72	0.87
TR12381_c0_g1	-	-	-	-	-	-	-	-	14.95	6.45	9.79	0.8	1.87	0	2.95	2.43	3.41	0.73	0.98	2.13
TR123846_c0_g1	PREDICTED: serine carboxypeptidase-like 25 [Nelumbo nucifera]	Serine carboxypeptidase-like 25 OS=Arabidopsis thaliana OX=3702 GN=SCPL25 PE=2 SV=2	Serine carboxypeptidase	-	-	-	-	-	0	0	0	0	0.04	0.04	0.76	0.79	1.35	0.09	0.07	0.05
TR123869_c0_g1	phage protein p13 [Hydrogenophaga sp. PBC]|AOS80263.1 hypothetical protein Q5W_15440 [Hydrogenophaga sp. PBC]	-	-	-	-	-	-	-	0.61	0.33	0.35	0.1	0.12	0.14	0.53	0.22	0.06	0.11	0.05	0.06
TR12389_c0_g1	-	-	-	-	-	-	-	-	0.13	0.21	0.15	0.19	0.23	0.15	1.06	1.02	1.13	2.9	2.89	3.25
TR12389_c0_g2	-	-	-	-	-	-	-	-	0	0	2	5.57	7.07	6.18	0	0	0	1.28	2.58	1.23
TR12396_c0_g1	PREDICTED: probable protein phosphatase 2C 59 [Cucumis sativus]|KGN55405.1 hypothetical protein Csa_4G651230 [Cucumis sativus]	Probable protein phosphatase 2C 59 OS=Arabidopsis thaliana OX=3702 GN=WIN2 PE=1 SV=1	-	-	-	-	-	-	0.57	0.84	0.83	0.99	0.78	1.09	1.24	1.45	1.64	0.31	0.48	0.46
TR124_c1_g1	unnamed protein product, partial [Vitis vinifera]	Heavy metal-associated isoprenylated plant protein 16 OS=Arabidopsis thaliana OX=3702 GN=HIPP16 PE=2 SV=1	C1 domain	-	-	-	-	-	9.01	10.3	9.76	16.99	17.27	17.09	33.76	33.65	35.09	3.42	2.83	3.37
TR1240_c1_g4	PREDICTED: uncharacterized protein LOC104591445 [Nelumbo nucifera]	-	Neprosin;Neprosin activation peptide	-	-	-	-	-	1.42	1.46	1.32	2.35	1.97	2.4	4.45	4.9	5.36	3.57	3.38	3.14
TR12409_c0_g1	-	-	-	-	-	-	-	-	25.57	27.23	24.83	7.57	8.57	7.8	9.54	11.69	13.3	8.07	9.52	10.84
TR12409_c1_g1	hypothetical protein AQUCO_00600344v1 [Aquilegia coerulea]	Protein GLUTAMINE DUMPER 3 OS=Arabidopsis thaliana OX=3702 GN=GDU3 PE=2 SV=1	-	-	-	-	-	-	17.03	18.48	17.74	15.76	16.51	18.69	12.07	10.37	11.04	2.99	2.51	2.34
TR1241_c1_g1	hypothetical protein AQUCO_06000061v1 [Aquilegia coerulea]	Serine carboxypeptidase-like 2 OS=Arabidopsis thaliana OX=3702 GN=SCPL2 PE=2 SV=1	Serine carboxypeptidase	-	-	-	-	-	2.28	2.01	3.02	0.39	0.53	0.44	1	0.97	0.8	0.68	0.26	0.14
TR1241_c1_g2	metallothionein-like protein type 2 [Hevea brasiliensis]	Metallothionein-like protein 2 OS=Cicer arietinum OX=3827 PE=3 SV=2	-	-	-	-	-	-	831.4	887.41	840.86	305.86	324.45	310.76	214.19	204.16	227.14	146.34	143.68	156.24
TR12419_c0_g1	phenylalanine ammonia-lyase 2 [Rubus idaeus]	Phenylalanine ammonia-lyase 3 OS=Petroselinum crispum OX=4043 GN=PAL3 PE=2 SV=1	Aromatic amino acid lyase	-	-	-	-	-	30.72	36.98	29.97	14.83	11.39	14.19	22.33	26.34	31.31	7.52	8.28	6.71
TR124238_c0_g1	-	Vacuolar cation/proton exchanger 1a OS=Oryza sativa subsp. japonica OX=39947 GN=CAX1a PE=1 SV=1	-	-	-	-	-	-	9.16	10.52	6.95	7.47	7.36	7.29	8.78	9.41	8.29	20.81	18.86	21.01
TR124295_c0_g3	Retrovirus-related Pol polyprotein from transposon RE2 [Vitis vinifera]	Retrovirus-related Pol polyprotein from transposon RE1 OS=Arabidopsis thaliana OX=3702 GN=RE1 PE=2 SV=1	Reverse transcriptase (RNA-dependent DNA polymerase)	-	-	-	-	-	0.04	0.04	0.08	0.03	0.04	0	0.41	0.74	0.78	0.05	0.02	0
TR12433_c1_g1	HLA class I histocompatibility antigen, B-14 alpha chain-like isoform X1 [Macaca nemestrina]	-	-	-	-	-	-	-	3.77	0.78	0.92	0.23	0.14	0.25	0.79	0.29	0.26	0.09	0.04	0
TR12437_c0_g1	3-beta hydroxysteroid dehydrogenase/isomerase [Macleaya cordata]	3beta-hydroxysteroid-dehydrogenase/decarboxylase isoform 3 OS=Arabidopsis thaliana OX=3702 GN=3BETAHSD/D3 PE=2 SV=2	3-beta hydroxysteroid dehydrogenase/isomerase family;NAD dependent epimerase/dehydratase family;GDP-mannose 4,6 dehydratase;Male sterility protein;NAD(P)H-binding;Reticulon	-	-	-	K07748|NSDHL, ERG26; sterol-4alpha-carboxylate 3-dehydrogenase (decarboxylating) [EC:1.1.1.170]	ko00100(Metabolism);ko01100(Metabolism);ko01110(Metabolism)	3.49	3.71	4.14	7.91	7.36	6.69	6.86	8.08	7.59	9.94	9.69	11.22
TR1244_c0_g1	hypothetical protein RhiirA5_482272, partial [Rhizophagus irregularis]	-	-	-	-	-	-	-	37.53	9.11	4.85	0.65	0.97	0.95	8.73	0.46	0.45	2.4	1.6	0.57
TR12450_c0_g1	-	-	-	-	-	-	-	-	0	0	0	12.03	8.08	9.52	0	0	0	1.48	0	0
TR12454_c1_g1	hypothetical protein AQUCO_00900564v1 [Aquilegia coerulea]	-	-	-	-	-	-	-	0.68	0.49	0.57	2.48	2.94	1.8	4.79	5.39	6.17	0.84	1.07	1.12
TR12454_c3_g1	-	-	-	-	-	-	-	-	0	0.09	0.16	0.66	0.71	0.88	0.21	0.56	0.65	0	0	0
TR12458_c0_g1	probable serine/threonine-protein kinase SIS8 [Papaver somniferum]|RZC49823.1 hypothetical protein C5167_018251 [Papaver somniferum]	Probable serine/threonine-protein kinase SIS8 OS=Arabidopsis thaliana OX=3702 GN=SIS8 PE=1 SV=1	-	-	-	-	-	-	1.05	1.02	0.8	1.41	1.17	1.7	0.33	0.25	0.58	0.57	0.85	0.92
TR124616_c0_g1	EF-hand domain [Macleaya cordata]	-	EF-hand domain pair;EF hand;EF hand	-	-	-	-	-	1.56	2.53	2.31	1.32	1.21	1.44	1.81	2.11	1.44	0.26	0.29	0.09
TR12468_c0_g1	hypothetical protein AQUCO_00100867v1 [Aquilegia coerulea]	Endochitinase EP3 OS=Arabidopsis thaliana OX=3702 GN=EP3 PE=1 SV=1	Chitinase class I	-	-	-	-	-	728.75	768.29	783.97	984.67	914.97	998.17	489.57	545.07	477.77	165.3	135.84	152.44
TR12468_c1_g1	PREDICTED: endochitinase PR4 [Eucalyptus grandis]	Endochitinase At2g43590 OS=Arabidopsis thaliana OX=3702 GN=At2g43590 PE=2 SV=1	-	-	-	-	-	-	198.25	188.83	116.81	5.41	0	8.62	14.19	22.87	42.26	26.94	37.94	29.17
TR12470_c0_g1	Glutathione S-transferase [Macleaya cordata]	Protein IN2-1 homolog B OS=Oryza sativa subsp. indica OX=39946 GN=GSTZ5 PE=1 SV=1	-	-	-	-	-	-	17.34	16.17	15.96	13.37	18.34	13.86	14.79	15.86	20.25	50.73	57.19	53.17
TR12470_c0_g2	PREDICTED: glutathione S-transferase L3 isoform X1 [Vitis vinifera]	-	-	-	-	-	-	-	35.95	42.78	71.66	69.69	64.92	71.68	243.39	293.41	272.09	701.05	765.34	666.95
TR12473_c1_g1	SANT/Myb domain [Macleaya cordata]	Transcription factor MYB41 OS=Arabidopsis thaliana OX=3702 GN=MYB17 PE=1 SV=1	Myb-like DNA-binding domain;Myb-like DNA-binding domain	-	-	-	-	-	1.37	2.02	1.43	0.48	0.77	0.35	0.95	1.14	0.58	0.39	0.37	0.49
TR12474_c0_g1	CTCL tumor antigen HD-CL-08 [Homo sapiens]|AAN51932.1 cervical cancer suppressor 3 [Homo sapiens]|BAF82131.1 unnamed protein product [Homo sapiens]	Elongation factor 1-alpha OS=Oryza sativa subsp. japonica OX=39947 GN=REFA1 PE=2 SV=2	-	-	-	-	-	-	44.17	5.58	9.86	4.29	0	0	1.28	8.75	0	1.59	2.06	1.51
TR12486_c0_g1	PREDICTED: probable mannitol dehydrogenase isoform X2 [Vitis vinifera]|XP_002266559.2 PREDICTED: probable mannitol dehydrogenase isoform X1 [Vitis vinifera]|RVX23144.1 putative mannitol dehydrogenase [Vitis vinifera]	Probable mannitol dehydrogenase OS=Fragaria ananassa OX=3747 GN=CAD PE=2 SV=1	Alcohol dehydrogenase GroES-like domain;Zinc-binding dehydrogenase;D-isomer specific 2-hydroxyacid dehydrogenase, NAD binding domain	-	-	-	K00083|CAD; cinnamyl-alcohol dehydrogenase [EC:1.1.1.195]	ko00940(Metabolism);ko01100(Metabolism);ko01110(Metabolism)	0.7	0.76	1.07	0.07	0.28	0.06	0.61	0.39	0.34	0.32	0.23	0.08
TR1249_c0_g1	zinc finger protein [Macleaya cordata]	Dof zinc finger protein PBF OS=Zea mays OX=4577 GN=PBF PE=1 SV=1	Dof domain, zinc finger	-	-	-	-	-	3.51	3.67	3.3	2.01	2.14	1.75	4.96	4.15	4.35	2.46	2.18	2.12
TR12491_c0_g1	PREDICTED: protein WALLS ARE THIN 1-like [Nelumbo nucifera]	Protein WALLS ARE THIN 1 OS=Arabidopsis thaliana OX=3702 GN=WAT1 PE=1 SV=1	EamA-like transporter family	-	-	-	-	-	6.49	6.86	6.17	1.54	1.2	1.71	5.78	6.08	4.89	0.22	0.19	0.44
TR12491_c0_g2	PREDICTED: protein WALLS ARE THIN 1 [Vitis vinifera]	Protein WALLS ARE THIN 1 OS=Arabidopsis thaliana OX=3702 GN=WAT1 PE=1 SV=1	EamA-like transporter family	-	-	-	-	-	5.78	6.61	6.69	2.85	2.69	3.73	2.52	2.45	2.66	0.27	0.46	0.41
TR12493_c0_g1	-	-	-	-	-	-	-	-	3.12	2.02	2.27	0.69	0.72	0.74	0.3	0.18	0.31	0.09	0.04	0
TR12496_c1_g2	-	-	-	-	-	-	-	-	0.91	1.09	0.82	0.13	0.05	0.24	0.19	0.18	0.05	0.06	0	0
TR1250_c0_g1	PREDICTED: nuclear transcription factor Y subunit A-7-like isoform X1 [Nelumbo nucifera]	Nuclear transcription factor Y subunit A-9 OS=Arabidopsis thaliana OX=3702 GN=NFYA9 PE=1 SV=1	CCAAT-binding transcription factor (CBF-B/NF-YA) subunit B	-	-	-	K08064|NFYA, HAP2; nuclear transcription factor Y, alpha	ko04612(Organismal Systems)	3.5	5.37	4.43	2.27	2.55	3.18	7.65	7.51	6.99	2.95	2.64	3.71
TR125019_c0_g1	-	-	-	-	-	-	-	-	57.92	78.9	32.5	93.96	85.94	56.7	2.71	7.23	2.41	102.14	79.9	49.27
TR125028_c1_g1	-	-	-	-	-	-	-	-	0.05	0.1	0	0.74	0.97	0.88	0	0	0	0.34	0.62	0.55
TR12503_c0_g1	uncharacterized protein LOC18046468 isoform X1 [Citrus clementina]	Retrovirus-related Pol polyprotein from transposon TNT 1-94 OS=Nicotiana tabacum OX=4097 PE=2 SV=1	Reverse transcriptase (RNA-dependent DNA polymerase)	-	-	-	-	-	0.14	0.22	0.23	0.59	0.72	0.65	0.97	0.58	0.47	0.31	0.35	0.28
TR12506_c0_g1	hypothetical protein AQUCO_00100493v1 [Aquilegia coerulea]	Mitochondrial arginine transporter BAC2 OS=Arabidopsis thaliana OX=3702 GN=BAC2 PE=1 SV=1	Mitochondrial carrier protein;Mitochondrial carrier protein	-	-	-	K15109|SLC25A20_29, CACT, CACL, CRC1; solute carrier family 25 (mitochondrial carnitine/acylcarnitine transporter), member 20/29	ko04714(Organismal Systems)	0.1	0	0	0.48	0.62	0.48	0.49	0.55	0.51	0.05	0.02	0.09
TR12510_c0_g1	ABC transporter-like [Macleaya cordata]	Pleiotropic drug resistance protein 2 OS=Nicotiana plumbaginifolia OX=4092 GN=PDR2 PE=2 SV=1	ABC transporter;ABC-transporter extracellular N-terminal	-	-	-	-	-	1.56	1.11	1.25	3.53	3.55	3.42	7.81	8.81	8.69	5.05	4.56	4.92
TR125160_c0_g1	PREDICTED: translocon-associated protein subunit alpha [Eucalyptus grandis]|KCW55477.1 hypothetical protein EUGRSUZ_I01376 [Eucalyptus grandis]	Translocon-associated protein subunit alpha OS=Arabidopsis thaliana OX=3702 GN=At2g21160 PE=2 SV=3	-	-	-	-	-	-	1.63	0.98	0.86	0.73	1.18	0.47	0.19	0.87	0.87	2.44	2.79	2.56
TR12517_c0_g3	PREDICTED: uncharacterized protein LOC100243921 [Vitis vinifera]|CBI27017.3 unnamed protein product, partial [Vitis vinifera]	-	Protein of unknown function (DUF1218)	-	-	-	-	-	27.34	27.74	28.88	14.16	12.64	13.08	8.4	9.05	9.79	3.68	3.86	3.45
TR12520_c0_g1	Pr180 [Moloney murine leukemia virus]	-	Zinc-finger like, probable DNA-binding;RNase H;Integrase core domain;Reverse transcriptase (RNA-dependent DNA polymerase);His(2)-Cys(2) zinc finger;ENV polyprotein (coat polyprotein);Matrix protein (MA), p15;Gag polyprotein, inner coat protein p12	-	-	-	-	-	4.53	0.61	0.59	0.07	0.11	0.05	0.51	0.34	0.09	0.05	0.03	0.03
TR125215_c0_g1	Retrovirus-related Pol polyprotein from transposon RE1 [Vitis vinifera]	Retrovirus-related Pol polyprotein from transposon RE1 OS=Arabidopsis thaliana OX=3702 GN=RE1 PE=2 SV=1	Reverse transcriptase (RNA-dependent DNA polymerase);Reverse transcriptase (RNA-dependent DNA polymerase)	-	-	-	-	-	0	0.03	0	0.39	0.21	0.72	0.18	0.32	0.13	0.11	0.2	0.11
TR12522_c0_g1	PREDICTED: inter-alpha-trypsin inhibitor heavy chain H3 isoform X1 [Rattus norvegicus]	-	Vault protein inter-alpha-trypsin domain;von Willebrand factor type A domain;von Willebrand factor type A domain;von Willebrand factor type A domain;Inter-alpha-trypsin inhibitor heavy chain C-terminus	metabolic process;proteolysis;nitrogen compound metabolic process;biological_process;negative regulation of metabolic process;cellular process;negative regulation of peptidase activity;negative regulation of macromolecule metabolic process;regulation of metabolic process;protein metabolic process;regulation of proteolysis;regulation of cellular metabolic process;negative regulation of cellular me…	molecular_function;enzyme inhibitor activity;endopeptidase inhibitor activity;endopeptidase regulator activity;molecular function regulator;peptidase inhibitor activity;enzyme regulator activity;peptidase regulator activity;serine-type endopeptidase inhibitor activity	cellular_component;extracellular region;extracellular space;vesicle;organelle;membrane-bounded organelle;extracellular organelle;extracellular region part;extracellular vesicle;extracellular exosome	-	-	4.63	0.92	0.81	0.26	0.36	0.36	0.77	0.56	0.49	0.04	0.18	0.13
TR12523_c0_g1	PREDICTED: CD97 antigen isoform X6 [Macaca fascicularis]	-	7 transmembrane receptor (Secretin family)	-	-	-	-	-	1.65	0.51	0.55	0.07	0.09	0.16	0.22	0.14	0.03	0	0	0.12
TR12524_c0_g1	PREDICTED: uncharacterized protein LOC104596144 [Nelumbo nucifera]	-	-	-	-	-	-	-	8.6	9.28	9.72	16.69	19.43	17.55	2.75	5.11	3.55	5.02	4.86	7.45
TR12528_c0_g1	PREDICTED: protein CWC15 homolog [Elaeis guineensis]	-	Cwf15/Cwc15 cell cycle control protein	-	-	-	K12863|CWC15; protein CWC15	ko03040(Genetic Information Processing)	77.6	87.45	94.27	80.76	79.59	81.89	74.3	76.04	77.4	147.96	151.81	152.39
TR12528_c0_g2	protein CWC15 A-like [Trifolium pratense]	-	-	-	-	-	-	-	0.89	0.49	0.96	0.35	0.11	0.27	0.22	0.38	0.55	1.24	1.6	1.39
TR125316_c0_g1	hypothetical protein AQUCO_02700217v1 [Aquilegia coerulea]	3-ketoacyl-CoA synthase 12 OS=Arabidopsis thaliana OX=3702 GN=KCS12 PE=2 SV=1	FAE1/Type III polyketide synthase-like protein;3-Oxoacyl-[acyl-carrier-protein (ACP)] synthase III C terminal;Chalcone and stilbene synthases, C-terminal domain	-	-	-	K15397|KCS; 3-ketoacyl-CoA synthase [EC:2.3.1.199]	ko00062(Metabolism);ko01100(Metabolism);ko01110(Metabolism);ko04626(Organismal Systems)	1.43	1.47	1.39	0.19	0.3	0.3	0.15	0.22	0.28	2.01	2.03	1.93
TR12532_c1_g1	NAC domain-containing protein 83-like protein [Cinnamomum micranthum f. kanehirae]	NAC domain-containing protein 83 OS=Arabidopsis thaliana OX=3702 GN=NAC083 PE=1 SV=1	No apical meristem (NAM) protein	-	-	-	-	-	11.62	10.78	11.47	3.57	4.43	4.33	5.13	5.84	6.91	3.6	4.38	4.31
TR12538_c0_g1	high mobility group B protein 15-like protein isoform X1 [Cinnamomum micranthum f. kanehirae]	High mobility group B protein 15 OS=Arabidopsis thaliana OX=3702 GN=HMGB15 PE=2 SV=1	-	-	-	-	-	-	0.02	0.04	0.1	0.2	0.09	0.09	0.02	0.06	0.1	0.91	0.87	0.8
TR12541_c0_g1	-	Polyadenylate-binding protein 2 OS=Arabidopsis thaliana OX=3702 GN=PAB2 PE=1 SV=1	-	-	-	-	-	-	1.28	0.86	1.11	1.1	1.28	1.4	1.1	1.14	1.15	0.31	0.38	0.58
TR125417_c0_g1	UNKNOWN [Stylonychia lemnae]	-	-	-	-	-	-	-	9.71	8.22	13.12	1.67	1.84	2.77	21.55	0.39	2.08	3.92	0.22	0
TR12542_c0_g1	trifunctional enzyme subunit beta, mitochondrial isoform X3 [Papio anubis]	Acetyl-CoA acetyltransferase, cytosolic 1 OS=Arabidopsis thaliana OX=3702 GN=AAT1 PE=1 SV=1	Thiolase, N-terminal domain;Thiolase, C-terminal domain;Beta-ketoacyl synthase, N-terminal domain	-	-	-	K00626|ACAT, atoB; acetyl-CoA C-acetyltransferase [EC:2.3.1.9]	ko00071(Metabolism);ko00072(Metabolism);ko00280(Metabolism);ko00310(Metabolism);ko00362(Metabolism);ko00380(Metabolism);ko00620(Metabolism);ko00630(Metabolism);ko00640(Metabolism);ko00650(Metabolism);ko00720(Metabolism);ko00900(Metabolism);ko01100(Metabolism);ko01110(Metabolism);ko01120(Metabolism);ko01200(Metabolism);ko01212(Metabolism);ko02020(Environmental Information Processing);ko04975(Organ…	1.6	0.49	0.63	0.17	0.11	0.26	0.47	0.23	0.52	0.11	0.09	0.11
TR12543_c0_g1	unnamed protein product, partial [Vitis vinifera]	Cytosolic Fe-S cluster assembly factor NBP35 OS=Arabidopsis thaliana OX=3702 GN=NBP35 PE=1 SV=1	-	-	-	-	-	-	12.2	16.1	13.87	7.86	5.47	5.19	53.98	37.73	31.56	6.52	7	6.22
TR12546_c1_g1	Hypothetical protein PFR_JS20-1_820 [Propionibacterium freudenreichii]|SCQ80873.1 Hypothetical protein PFR_JS20-2_824 [Propionibacterium freudenreichii]	-	-	-	-	-	-	-	1	0.41	13.26	0.15	0.22	0.24	0.3	0	0.47	0.29	0.29	0
TR1255_c0_g1	-	-	-	-	-	-	-	-	13.44	13.74	12.41	15.77	16.92	15.79	8.34	7.58	7.4	4.81	4.02	4.99
TR12551_c0_g1	Peptidase M3A/M3B [Macleaya cordata]	Mitochondrial intermediate peptidase, mitochondrial OS=Arabidopsis thaliana OX=3702 GN=OCT1 PE=3 SV=1	Peptidase family M3	-	-	-	-	-	1.17	1.36	1.23	1.12	1.28	1	2.5	2.66	2.72	3.08	2.89	2.72
TR12556_c0_g2	PREDICTED: alanine--glyoxylate aminotransferase 2 homolog 3, mitochondrial [Nelumbo nucifera]	Alanine--glyoxylate aminotransferase 2 homolog 3, mitochondrial OS=Arabidopsis thaliana OX=3702 GN=At3g08860 PE=2 SV=1	Aminotransferase class-III	-	-	-	K00827|AGXT2; alanine-glyoxylate transaminase / (R)-3-amino-2-methylpropionate-pyruvate transaminase [EC:2.6.1.44 2.6.1.40]	ko00250(Metabolism);ko00260(Metabolism);ko00270(Metabolism);ko00280(Metabolism);ko01100(Metabolism);ko01110(Metabolism)	34.13	36.09	34.52	14.09	15.56	13.53	26.42	26.85	25.23	63.66	63.12	63.55
TR125574_c0_g1	-	-	-	-	-	-	-	-	0	0	0	1.32	0.97	1.01	0.29	0.14	0	0	0	0
TR1256_c0_g1	Protein kinase domain [Macleaya cordata]	Leucine-rich repeat receptor-like serine/threonine/tyrosine-protein kinase SOBIR1 OS=Arabidopsis thaliana OX=3702 GN=SOBIR1 PE=1 SV=1	Protein kinase domain;Protein tyrosine kinase;Leucine Rich repeats (2 copies);Leucine rich repeat;Leucine Rich Repeat	-	-	-	-	-	29.36	29.96	30.49	32.88	31.98	32.15	12.16	12.09	12.62	5.17	4.96	5.3
TR12565_c0_g1	phosphatidylinositol-binding clathrin assembly protein isoform X5 [Aotus nancymaae]|XP_017366140.1 PREDICTED: phosphatidylinositol-binding clathrin assembly protein isoform X16 [Cebus capucinus imitator]	Putative clathrin assembly protein At1g14910 OS=Arabidopsis thaliana OX=3702 GN=At1g14910 PE=2 SV=2	ANTH domain;ENTH domain	vesicle-mediated transport;transport;biological_process;localization;establishment of localization;import into cell;cellular process;cellular component assembly;cellular component organization;cellular protein-containing complex assembly;protein-containing complex subunit organization;cellular component biogenesis;protein-containing complex assembly;cellular component organization or biogenesis;c…	molecular_function;binding;phospholipid binding;lipid binding;phosphatidylinositol binding;ion binding;anion binding;protein binding;1-phosphatidylinositol binding;clathrin binding	intracellular;cellular_component;cell;cytoplasm;coated vesicle;cytoplasmic vesicle;vesicle;organelle;membrane-bounded organelle;intracellular organelle;intracellular part;cytoplasmic part;cell part;intracellular vesicle;clathrin-coated vesicle	-	-	2.08	0.43	0.42	0.22	0.25	0.22	0.46	0.28	0.28	0.39	0.09	0.14
TR12574_c0_g1	multicystatin-like isoform X1 [Helianthus annuus]	Cysteine proteinase inhibitor 4 OS=Oryza sativa subsp. japonica OX=39947 GN=Os01g0915200 PE=2 SV=1	Aspartic acid proteinase inhibitor;Cystatin domain;Phloem filament protein PP1 cystatin-like domain	-	-	-	K13899|CST3; cystatin-C	ko04970(Organismal Systems)	1.58	1.42	1.64	5.73	6.57	4.85	3.35	2.97	3.87	0.76	0.73	1.24
TR12584_c0_g1	filamin-A isoform 1 [Mus musculus]|XP_011245851.1 PREDICTED: filamin-A isoform X2 [Mus musculus]|CAT00727.1 filamin, alpha [Mus musculus]	-	Filamin/ABP280 repeat;Y_Y_Y domain;Bacterial Ig-like domain (group 3)	blood vessel development;vasculature development;multicellular organism development;anatomical structure morphogenesis;biological_process;anatomical structure formation involved in morphogenesis;multicellular organismal process;developmental process;tube morphogenesis;tube development;blood vessel morphogenesis;system development;anatomical structure development;cardiovascular system development;…	protein binding;molecular_function;binding;actin binding;cytoskeletal protein binding;protein-containing complex binding;enzyme binding;kinase binding;protein kinase binding;channel regulator activity;molecular function regulator;ion channel regulator activity;Ras GTPase binding;small GTPase binding;GTPase binding;G protein-coupled receptor binding;signaling receptor binding;opioid receptor bindi…	intracellular;cellular_component;contractile fiber;membrane;extracellular region;extracellular space;cell;nucleus;cytoplasm;chromosome;intracellular membrane-bounded organelle;Golgi apparatus;cytoskeleton;actin filament;cell-cell junction;adherens junction;cell-substrate adherens junction;cell cortex;endomembrane system;actin cytoskeleton;neuron projection;myofibril;sarcomere;cell junction;cell-s…	-	-	1.68	0.38	0.42	0.12	0.02	0.02	0.17	0.15	0.14	0.05	0.04	0
TR12587_c0_g2	probable inactive receptor kinase At5g58300 [Phoenix dactylifera]|XP_008803003.1 probable inactive receptor kinase At5g58300 [Phoenix dactylifera]|XP_008803004.1 probable inactive receptor kinase At5g58300 [Phoenix dactylifera]|XP_008803005.1 probable inactive receptor kinase At5g58300 [Phoenix dactylifera]|XP_008803006.1 probable inactive receptor kinase At5g58300 [Phoenix dactylifera]|XP_017700…	Probable inactive receptor kinase At5g58300 OS=Arabidopsis thaliana OX=3702 GN=At5g58300 PE=2 SV=1	Protein tyrosine kinase;Protein kinase domain;Leucine rich repeat;Leucine Rich repeats (2 copies);Leucine rich repeat N-terminal domain	-	-	-	-	-	3.17	3.69	3.01	2.13	2.26	2	2.44	2.56	2.26	0.95	0.81	0.96
TR12590_c1_g1	Pentatricopeptide repeat [Macleaya cordata]	Pentatricopeptide repeat-containing protein At3g06920 OS=Arabidopsis thaliana OX=3702 GN=At3g06920 PE=2 SV=1	PPR repeat family;PPR repeat;PPR repeat;Pentatricopeptide repeat domain;Pentacotripeptide-repeat region of PRORP;Mitochondrial 28S ribosomal protein S27;Tetratricopeptide repeat	-	-	-	-	-	0.39	0.52	0.47	0.53	0.53	0.51	0.83	0.87	0.68	1.5	1.5	1.53
TR12601_c0_g1	Nuclear pore complex protein Nup133, partial [Bos mutus]	Actin OS=Mesostigma viride OX=41882 PE=3 SV=1	Actin	-	-	-	-	-	18.28	4.69	3.81	1.59	1.63	1.63	4.28	3.77	0.67	0.5	1.33	1.19
TR12608_c1_g1	putative disease resistance protein RGA1 [Phoenix dactylifera]|XP_026660140.1 putative disease resistance protein RGA1 [Phoenix dactylifera]|XP_026660141.1 putative disease resistance protein RGA1 [Phoenix dactylifera]|XP_026660142.1 putative disease resistance protein RGA1 [Phoenix dactylifera]|XP_026660143.1 putative disease resistance protein RGA1 [Phoenix dactylifera]|XP_026660144.1 putative …	Putative disease resistance protein RGA1 OS=Solanum bulbocastanum OX=147425 GN=RGA1 PE=2 SV=2	NB-ARC domain	-	-	-	-	-	0.27	0.99	0.53	3.2	2.33	2.41	1.06	1.13	0.65	0.13	0.25	0.13
TR1261_c2_g1	Mlo-related protein [Macleaya cordata]	MLO-like protein 11 OS=Arabidopsis thaliana OX=3702 GN=MLO11 PE=2 SV=1	Mlo family	-	-	-	-	-	2.53	2.69	2.67	1.01	1.31	1.19	1.38	1.17	1.34	5.74	5.29	5.81
TR1261_c6_g1	PREDICTED: ELMO domain-containing protein A-like isoform X1 [Nelumbo nucifera]	-	ELMO/CED-12 family	-	-	-	-	-	3.68	3.12	3.82	2.51	2.66	1.96	3.18	2.54	2.99	8.25	8.86	8.11
TR12621_c0_g1	Protein of unknown function DUF761 [Macleaya cordata]	-	Cotton fibre expressed protein	-	-	-	-	-	12.03	12.67	11.56	12.43	11.91	11.88	9.23	7.7	7.22	13.86	15.63	15.94
TR1263_c2_g1	-	-	-	-	-	-	-	-	0.46	0.56	0.59	1.01	0.41	0.89	2.39	2.62	2.15	0.85	0.85	1.32
TR1263_c3_g1	PREDICTED: uncharacterized protein LOC104590462 [Nelumbo nucifera]	-	Protein of unknown function (DUF1517)	-	-	-	-	-	11	11.67	8.99	4	4.16	4.06	2.3	2.81	3.05	3.19	3.18	3.47
TR12634_c0_g2	cathepsin Z [Papio anubis]|XP_011914253.1 PREDICTED: cathepsin Z [Cercocebus atys]|XP_011914254.1 PREDICTED: cathepsin Z [Cercocebus atys]|XP_025253852.1 cathepsin Z [Theropithecus gelada]|EHH19556.1 Cathepsin Z [Macaca mulatta]	Senescence-specific cysteine protease SAG12 OS=Arabidopsis thaliana OX=3702 GN=SAG12 PE=1 SV=1	Papain family cysteine protease	-	-	-	K08568|CTSZ; cathepsin X [EC:3.4.18.1]	ko04142(Cellular Processes);ko04210(Cellular Processes)	3.21	0.99	0.96	0.23	0.27	0.33	0.95	0.37	0.39	0.23	0.06	0.29
TR12637_c0_g1	hypothetical protein EGK_06667 [Macaca mulatta]	Mitochondrial uncoupling protein 1 OS=Arabidopsis thaliana OX=3702 GN=PUMP1 PE=1 SV=1	Mitochondrial carrier protein	-	-	-	-	-	1.69	0.32	0.49	0	0.08	0.16	0.4	0.37	0.04	0.1	0.07	0.1
TR12639_c0_g1	-	-	-	-	-	-	-	-	1.25	1.7	1.19	1.37	0.89	0.86	1.74	2.18	1.44	0.44	0.33	0.44
TR126397_c0_g1	high mobility group protein HMG-I/HMG-Y isoform a [Mus musculus]|NP_057869.2 high mobility group protein HMG-I/HMG-Y isoform a [Mus musculus]|NP_001034445.1 high mobility group protein HMG-I/HMG-Y isoform a [Mus musculus]|NP_001159948.1 high mobility group protein HMG-I/HMG-Y isoform 1 [Mus musculus]|NP_001160007.1 high mobility group protein HMG-I/HMG-Y isoform a [Mus musculus]|NP_001160008.1 hi…	-	-	-	-	-	-	-	2.72	0.33	0.19	0.03	0.07	0	0.08	0.16	0.12	0	0.11	0
TR12640_c0_g1	Glycerol-3-phosphate dehydrogenase [Macleaya cordata]	Glycerol-3-phosphate dehydrogenase [NAD(+)] OS=Cuphea lanceolata OX=3930 GN=GPDH PE=2 SV=1	NAD-dependent glycerol-3-phosphate dehydrogenase C-terminus;NAD-dependent glycerol-3-phosphate dehydrogenase N-terminus	-	-	-	K00006|GPD1; glycerol-3-phosphate dehydrogenase (NAD+) [EC:1.1.1.8]	ko00564(Metabolism);ko01110(Metabolism);ko04011(Environmental Information Processing)	0.17	0.19	0.1	0.3	0.3	0.16	4	3.52	3.29	0.18	0.24	0.21
TR12647_c0_g1	-	-	-	-	-	-	-	-	0.36	0.19	0.25	0.5	0.69	0.51	1.01	1.11	0.94	0.27	0.15	0.1
TR1265_c1_g1	Prephenate dehydratase [Macleaya cordata]	Arogenate dehydratase 3, chloroplastic OS=Arabidopsis thaliana OX=3702 GN=ADT3 PE=1 SV=1	Prephenate dehydratase	-	-	-	K05359|ADT, PDT; arogenate/prephenate dehydratase [EC:4.2.1.91 4.2.1.51]	ko00400(Metabolism);ko01100(Metabolism);ko01110(Metabolism);ko01230(Metabolism)	77.93	83.19	79.21	67.46	67.3	67.45	98.91	97.38	84.44	18.51	15.72	17.85
TR126552_c0_g2	-	-	-	-	-	-	-	-	2.49	2.79	2.4	0	0	0.36	0.37	0.27	0	0.92	0.53	0.9
TR126661_c0_g1	alpha-tocopherol transfer protein [Rattus norvegicus]|P41034.1 RecName: Full=Alpha-tocopherol transfer protein	-	CRAL/TRIO domain	reproduction;in utero embryonic development;placenta development;developmental process involved in reproduction;multicellular organism development;embryo development;biological_process;embryo development ending in birth or egg hatching;reproductive process;multicellular organismal process;developmental process;chordate embryonic development;animal organ development;embryonic organ development;rep…	molecular_function;binding;phospholipid binding;lipid binding;phosphatidylinositol binding;ion binding;anion binding;phosphatidylinositol phosphate binding;phosphatidylinositol bisphosphate binding;vitamin binding;small molecule binding;organic cyclic compound binding;heterocyclic compound binding;vitamin E binding;phosphatidylinositol-4,5-bisphosphate binding;transporter activity;phosphatidylino…	intracellular;cellular_component;cell;cytoplasm;endosome;endomembrane system;cytoplasmic vesicle;vesicle;organelle;membrane-bounded organelle;intracellular organelle;intracellular part;cytoplasmic part;cell part;intracellular vesicle;cytosol;late endosome	-	-	1.77	0.3	0.14	0.08	0.02	0.11	0.21	0.15	0.31	0.06	0.01	0
TR12671_c0_g1	PREDICTED: putative glucuronosyltransferase PGSIP6 [Nicotiana sylvestris]	Inositol phosphorylceramide glucuronosyltransferase 1 OS=Arabidopsis thaliana OX=3702 GN=IPUT1 PE=1 SV=1	-	-	-	-	-	-	0.1	0.15	0.12	0.55	0.56	0.4	1.78	2.44	2.73	0.25	0.17	0.36
TR12677_c1_g1	protein of unknown function DUF221 [Macleaya cordata]	Calcium permeable stress-gated cation channel 1 OS=Arabidopsis thaliana OX=3702 GN=CSC1 PE=2 SV=1	Cytosolic domain of 10TM putative phosphate transporter;Late exocytosis, associated with Golgi transport	-	-	-	-	-	0.36	0.16	0.23	0.29	0.49	0.27	1.05	1.08	1.66	0.5	0.73	0.62
TR1268_c1_g2	uncharacterized protein LOC112175738 [Rosa chinensis]|PRQ20952.1 hypothetical protein RchiOBHm_Chr7g0233751 [Rosa chinensis]	-	-	-	-	-	-	-	0.57	0.28	0	0.24	0.64	0	24.22	19.82	25.11	0	0.2	0.85
TR1268_c2_g1	hypothetical protein [Homo sapiens]	-	-	-	-	-	-	-	2.55	0.62	0.98	0.08	0.17	0	0.34	0.08	0.12	0	0.03	0.07
TR12683_c0_g1	-	-	Leucine Rich repeats (2 copies);Leucine rich repeat;Leucine Rich Repeat	-	-	-	-	-	7.83	6.97	8.45	16.82	16.6	15.86	15.53	17.93	14.98	16.35	13.32	12.99
TR12685_c0_g1	-	-	-	-	-	-	-	-	2.77	3.77	4.18	0	0.22	0.35	0.81	1.23	0.47	0.71	0.61	0.43
TR12692_c0_g1	topless-related protein 1 isoform X1 [Selaginella moellendorffii]	Protein TPR2 OS=Oryza sativa subsp. japonica OX=39947 GN=TPR2 PE=1 SV=1	-	-	-	-	-	-	0	2.01	2.53	7.94	12.05	10.33	1.3	1.88	0	0	1.43	0.78
TR12705_c0_g1	-	40S ribosomal protein S15a-1 OS=Arabidopsis thaliana OX=3702 GN=RPS15AA PE=2 SV=2	-	-	-	-	-	-	68.05	62.02	82.22	99.65	91.09	67.3	30.6	57.72	45.45	19.49	25.03	19.83
TR12712_c0_g2	PREDICTED: cysteine proteinase inhibitor 1-like [Nelumbo nucifera]	Cysteine proteinase inhibitor 1 OS=Actinidia deliciosa OX=3627 PE=1 SV=1	Aspartic acid proteinase inhibitor;Cystatin domain	-	-	-	K13899|CST3; cystatin-C	ko04970(Organismal Systems)	58.98	46.53	46.41	6.83	8.31	7.91	36.1	33.08	38.97	87.43	71.69	84.5
TR12712_c1_g1	PREDICTED: cysteine proteinase inhibitor 1-like [Nelumbo nucifera]	Cysteine proteinase inhibitor 1 OS=Actinidia deliciosa OX=3627 PE=1 SV=1	Aspartic acid proteinase inhibitor;Cystatin domain	-	-	-	K13899|CST3; cystatin-C	ko04970(Organismal Systems)	75.36	71.19	74.89	7.87	9.11	9.76	9.77	5.98	7.39	10.75	10.48	8.47
TR12723_c0_g1	-	-	-	-	-	-	-	-	0.35	0.27	0.27	0.25	0.51	0.35	1.23	1.13	1.05	0.05	0.05	0.27
TR12724_c0_g1	hypothetical protein AQUCO_01400555v1 [Aquilegia coerulea]	L-ascorbate oxidase OS=Cucumis sativus OX=3659 PE=1 SV=1	Multicopper oxidase;Multicopper oxidase	-	-	-	-	-	1.4	0.7	1.31	1.32	1.41	1.36	5.7	6.06	6.96	2.3	2.25	2.01
TR12727_c0_g1	Cellulose synthase [Macleaya cordata]	Cellulose synthase-like protein G2 OS=Arabidopsis thaliana OX=3702 GN=CSLG2 PE=2 SV=1	-	-	-	-	-	-	0.42	0.96	1.37	3.58	3.24	3.2	2.11	1.44	2.78	4.12	2.83	3.21
TR127346_c0_g1	hypothetical protein AQUCO_08600030v1, partial [Aquilegia coerulea]	3,9-dihydroxypterocarpan 6A-monooxygenase OS=Glycine max OX=3847 GN=CYP93A1 PE=1 SV=1	Cytochrome P450	-	-	-	-	-	1.29	1.47	2.22	0	0	0	0.26	0.56	0.34	0.08	0	0
TR12739_c0_g1	-	-	-	-	-	-	-	-	0	0	0	0	0	0	1.2	2.56	1.72	0	0.1	0
TR12743_c0_g1	hypothetical protein BVC80_9021g29 [Macleaya cordata]	-	-	-	-	-	-	-	1.19	2.06	1.43	1.85	2.13	2.39	0.68	0.79	0.55	0.26	0.22	0.26
TR12745_c0_g1	troponin T, cardiac muscle [Rattus norvegicus]|XP_008767759.1 PREDICTED: troponin T, cardiac muscle isoform X5 [Rattus norvegicus]|P50753.2 RecName: Full=Troponin T, cardiac muscle	-	Troponin	system process;circulatory system process;heart process;blood circulation;biological_process;multicellular organismal process;regulation of system process;regulation of biological process;regulation of multicellular organismal process;heart contraction;biological regulation;regulation of blood circulation;negative regulation of catalytic activity;regulation of ATPase activity;negative regulation …	protein binding;molecular_function;binding;cytoskeletal protein binding;molecular adaptor activity;structural molecule activity;catalytic activity;nucleoside-triphosphatase activity;pyrophosphatase activity;hydrolase activity;hydrolase activity, acting on acid anhydrides;hydrolase activity, acting on acid anhydrides, in phosphorus-containing anhydrides;protein binding, bridging;actin binding;trop…	intracellular;cellular_component;contractile fiber;cell;cytoplasm;cytoskeleton;striated muscle thin filament;actin cytoskeleton;myofibril;sarcomere;protein-containing complex;myofilament;organelle;non-membrane-bounded organelle;intracellular organelle;intracellular non-membrane-bounded organelle;organelle part;intracellular part;cytoskeletal part;cytoplasmic part;intracellular organelle part;cont…	-	-	4.22	2.24	2.31	0.63	0.65	1.05	2.07	2.21	1.45	0.34	0.63	0.83
TR12749_c0_g1	B3 DNA binding domain [Macleaya cordata]	B3 domain-containing protein Os11g0197600 OS=Oryza sativa subsp. japonica OX=39947 GN=Os11g0197600 PE=2 SV=1	B3 DNA binding domain	-	-	-	-	-	3.99	3.93	3.64	1.12	1.3	1.4	0.77	1.08	1.43	0.9	1.01	0.75
TR12754_c0_g1	PREDICTED: uncharacterized protein LOC104609306 [Nelumbo nucifera]	-	-	-	-	-	-	-	8.14	8.97	8.04	0.97	0.88	0.58	1.44	1.23	0.47	0.16	0.12	0.16
TR12756_c0_g1	hypothetical protein AQUCO_00600314v1 [Aquilegia coerulea]	Proline dehydrogenase 1, mitochondrial OS=Arabidopsis thaliana OX=3702 GN=POX1 PE=1 SV=2	Proline dehydrogenase	-	-	-	K00318|PRODH, fadM, putB; proline dehydrogenase [EC:1.5.5.2]	ko00330(Metabolism);ko01100(Metabolism);ko01110(Metabolism)	20.79	22.63	23.54	7.49	7.97	7.93	18.88	18.86	20.4	7.14	6.28	7.36
TR1276_c1_g2	-	-	-	-	-	-	-	-	0.13	0	0	0	0.45	0.16	0.16	0.08	0	4.06	4.12	3.29
TR12763_c0_g1	PREDICTED: LOW QUALITY PROTEIN: vignain [Elaeis guineensis]	Thiol protease SEN102 OS=Hemerocallis sp. OX=29711 GN=SEN102 PE=2 SV=1	-	-	-	-	-	-	1.8	2.1	1.12	2.49	2.02	2.86	6.89	5.1	5.79	6.42	6.77	4.93
TR12766_c0_g1	putative inactive leucine-rich repeat receptor-like protein kinase-like [Dorcoceras hygrometricum]	Photosystem I chlorophyll a/b-binding protein 6, chloroplastic OS=Arabidopsis thaliana OX=3702 GN=LHCA6 PE=1 SV=1	Chlorophyll A-B binding protein;Protein kinase domain;Protein tyrosine kinase	-	-	-	K08908|LHCA2; light-harvesting complex I chlorophyll a/b binding protein 2	ko00196(Metabolism);ko01100(Metabolism)	1.45	1.4	1.42	1.65	1.52	1.68	0.77	0.59	0.37	0.2	0.44	0.63
TR127690_c0_g1	hypothetical protein SNOG_15614 [Parastagonospora nodorum SN15]|EAT76989.1 hypothetical protein SNOG_15614 [Parastagonospora nodorum SN15]	-	Heat shock protein 9/12	-	molecular_function;binding;lipid binding	intracellular;cellular_component;membrane;cell;cytoplasm;intracellular part;cytoplasmic part;cell part;cell periphery;cytosol;plasma membrane	-	-	1.57	1.26	1.49	0	0	0	0.19	0	0	0	0	0
TR127705_c0_g1	Tify [Macleaya cordata]	-	-	-	-	-	-	-	66.06	63.41	76.95	36.4	29.33	27.17	26.35	27.89	25.47	16.87	14.92	19.05
TR1278_c1_g1	hypothetical protein CDL12_04353 [Handroanthus impetiginosus]	-	-	-	-	-	-	-	682.91	668.92	687.89	782.67	782.49	776.49	374.32	392.65	430.65	178.63	167.4	166.19
TR127871_c0_g1	hypothetical protein CK203_071585 [Vitis vinifera]	-	-	-	-	-	-	-	33.48	42.08	41.41	47.07	26.98	65.03	50.7	32.58	25.11	85.29	70.81	75.39
TR1279_c0_g1	PREDICTED: phosphate transporter PHO1 homolog 3 [Nelumbo nucifera]|XP_010258342.1 PREDICTED: phosphate transporter PHO1 homolog 3 [Nelumbo nucifera]|XP_010258351.1 PREDICTED: phosphate transporter PHO1 homolog 3 [Nelumbo nucifera]|XP_019053627.1 PREDICTED: phosphate transporter PHO1 homolog 3 [Nelumbo nucifera]	Phosphate transporter PHO1 homolog 3 OS=Arabidopsis thaliana OX=3702 GN=PHO1	EXS family;SPX domain	-	-	-	-	-	7.25	7.77	6.75	13.71	13.89	14.56	28.7	28.69	28.35	12.41	12.36	12.6
TR1279_c0_g2	hypothetical protein AQUCO_00200685v1 [Aquilegia coerulea]	Phosphate transporter PHO1 homolog 3 OS=Arabidopsis thaliana OX=3702 GN=PHO1	SPX domain;EXS family;EXS family	-	-	-	-	-	1.82	1.82	1.89	0.86	0.82	0.82	1.49	1.89	2.1	0.99	1.04	1.02
TR127904_c0_g1	hypothetical protein PENPOL_c016G08507 [Penicillium polonicum]	-	Glycosyl hydrolases family 16	-	-	-	-	-	1.55	0.08	0.15	0	0.05	0	0.1	0.05	0.1	0	0	0.06
TR127958_c0_g1	-	-	-	-	-	-	-	-	0	0	0	2.31	1.54	2.66	1.01	0.49	3.25	0	0	0.82
TR12799_c0_g1	unnamed protein product [Rattus norvegicus]	-	Serum albumin family;Ubiquitin carboxyl-terminal hydrolase;Ubiquitin carboxyl-terminal hydrolase	-	-	-	-	-	83.57	19.41	18.47	5.31	6.23	5.45	16.13	15.9	12.53	3.39	2.88	3.7
TR12803_c0_g1	hypothetical protein MANES_11G098300 [Manihot esculenta]	-	-	-	-	-	-	-	2.94	2.03	2.46	3.31	3.85	3.3	1.08	0.76	1.51	0.24	0.63	1.45
TR12806_c0_g1	hypothetical protein GLYMA_13G018000 [Glycine max]	-	-	-	-	-	-	-	25.88	23.8	42.36	5.81	10.36	12.1	29.97	7.84	6.95	5.25	4.6	7.54
TR128123_c0_g1	PEARLI1-like lipid transfer protein [Actinidia chinensis var. chinensis]	14 kDa proline-rich protein DC2.15 OS=Daucus carota OX=4039 PE=2 SV=1	Hydrophobic seed protein;Protease inhibitor/seed storage/LTP family;Probable lipid transfer	-	-	-	-	-	0.56	1.25	0.4	1.02	0.13	0.39	3.58	2.63	2.56	1.47	1.16	1.14
TR1282_c0_g1	protein inturned [Felis catus]	-	-	-	-	-	-	-	31.92	10.84	10.91	2.48	2.29	3.31	9.97	4.81	3.9	2.62	1.37	0.9
TR12826_c0_g1	hypothetical protein AQUCO_00201005v1 [Aquilegia coerulea]|PIA63366.1 hypothetical protein AQUCO_00201005v1 [Aquilegia coerulea]	Zinc finger protein CONSTANS-LIKE 2 OS=Arabidopsis thaliana OX=3702 GN=COL2 PE=1 SV=1	CCT motif;B-box zinc finger	-	-	-	-	-	3.06	3.81	2.81	0.94	1.09	1.71	1.69	1.25	1.18	1.04	1.03	1.75
TR12832_c0_g1	PREDICTED: small nuclear ribonucleoprotein-associated protein N isoform X1 [Callithrix jacchus]	-	LSM domain	-	-	-	K11086|SNRPB, SMB; small nuclear ribonucleoprotein B and B'	ko03040(Genetic Information Processing)	3.32	1.14	1.08	0.1	0.36	0.32	1.26	0.29	0.34	0.17	0.08	0.23
TR12834_c0_g1	-	-	-	-	-	-	-	-	0	0	0	10.44	12.14	7.32	1.14	0.27	1.06	0	0.63	0
TR12836_c0_g1	hypothetical protein CFR70_13735 [Rhodocyclaceae bacterium]	-	-	-	-	-	-	-	14.64	13.82	13.99	0.79	2.73	1.89	13.63	0.56	2.93	3.73	1.71	0
TR12837_c0_g1	-	-	-	-	-	-	-	-	1.37	1.31	1.77	0.78	0.5	0.51	0.05	0.01	0.05	0.1	0.02	0.19
TR12842_c0_g1	hypothetical protein BVC80_9097g85 [Macleaya cordata]	Protein PHYTOCHROME KINASE SUBSTRATE 1 OS=Arabidopsis thaliana OX=3702 GN=PKS1 PE=1 SV=2	-	-	-	-	-	-	0.33	0.25	0.34	0.53	0.59	0.65	0.2	0.24	0.13	0.09	0.33	0.29
TR12852_c0_g1	Kelch repeat type 1 [Macleaya cordata]	-	Galactose oxidase, central domain;Galactose oxidase, central domain;Kelch motif;Kelch motif;Kelch motif;Kelch motif	-	-	-	-	-	0.67	0.53	0.47	0.94	1.07	0.9	1.47	1.68	1.34	0.09	0.15	0.17
TR12855_c0_g1	-	DEAD-box ATP-dependent RNA helicase 15 OS=Oryza sativa subsp. japonica OX=39947 GN=AIP2 PE=1 SV=1	-	-	-	-	-	-	1.19	1.55	1.72	1.26	1.71	0.56	5.13	4.63	5.19	3.23	3.23	2.01
TR12862_c0_g1	hypothetical protein AQUCO_04900232v1 [Aquilegia coerulea]	Primary amine oxidase 2 OS=Arabidopsis thaliana OX=3702 GN=At1g31672 PE=3 SV=1	Copper amine oxidase, enzyme domain	-	-	-	-	-	4.3	3.47	3.46	0.64	0.39	0.35	0.55	0.78	0.21	0.99	1.13	1.31
TR128633_c0_g1	PREDICTED: myeloid cell nuclear differentiation antigen [Macaca mulatta]|XP_014968179.1 PREDICTED: myeloid cell nuclear differentiation antigen [Macaca mulatta]	-	HIN-200/IF120x domain	response to stress;biological_process;cellular process;cellular response to stress;response to stimulus;cellular response to stimulus;cell activation;immune system process;regulation of immune system process;negative regulation of immune system process;regulation of leukocyte activation;negative regulation of leukocyte activation;cell proliferation;negative regulation of cell proliferation;regula…	-	cellular_component;extracellular region;extracellular space;vesicle;organelle;membrane-bounded organelle;extracellular organelle;extracellular region part;extracellular vesicle;extracellular exosome	-	-	2.86	0.59	0.42	0.05	0.18	0.15	0.42	0.24	0.24	0	0.02	0.05
TR12874_c0_g1	hypothetical protein VITISV_016638 [Vitis vinifera]	Probable amidase At4g34880 OS=Arabidopsis thaliana OX=3702 GN=At4g34880 PE=2 SV=1	Amidase	-	-	-	K01426|E3.5.1.4, amiE; amidase [EC:3.5.1.4]	ko00330(Metabolism);ko00360(Metabolism);ko00380(Metabolism);ko00627(Metabolism);ko00643(Metabolism);ko01100(Metabolism);ko01120(Metabolism)	2.67	3.14	3	2.76	2.81	2.57	1.01	1.11	1.05	1.11	0.8	0.66
TR12878_c0_g1	-	Probable sodium/metabolite cotransporter BASS3, chloroplastic OS=Oryza sativa subsp. japonica OX=39947 GN=BASS3 PE=2 SV=1	-	-	-	-	-	-	1.64	1.38	1.53	0.85	0.8	0.67	2.12	2.61	3.6	0.94	1.3	0.94
TR128863_c0_g1	carboxypeptidase B2 precursor [Rattus norvegicus]|Q9EQV9.1 RecName: Full=Carboxypeptidase B2	-	Zinc carboxypeptidase;Carboxypeptidase activation peptide	regulation of extracellular matrix constituent secretion;secretion;transport;biological_process;cellular process;cellular component organization;extracellular matrix organization;regulation of localization;secretion by cell;extracellular structure organization;positive regulation of biological process;positive regulation of cellular process;regulation of biological process;regulation of cellular …	molecular_function;catalytic activity;metalloexopeptidase activity;carboxypeptidase activity;metallopeptidase activity;peptidase activity;exopeptidase activity;peptidase activity, acting on L-amino acid peptides;hydrolase activity;catalytic activity, acting on a protein;binding;metal ion binding;ion binding;cation binding;transition metal ion binding;zinc ion binding;metallocarboxypeptidase activ…	cellular_component;extracellular region;extracellular space;vesicle;organelle;membrane-bounded organelle;extracellular organelle;extracellular region part;extracellular vesicle;extracellular exosome	-	-	1.6	0.22	0.17	0.06	0	0.04	0.56	0.14	0.27	0.11	0.08	0.05
TR1289_c0_g1	hypothetical protein AQUCO_01100132v1 [Aquilegia coerulea]	Histidine kinase 3 OS=Arabidopsis thaliana OX=3702 GN=AHK3 PE=1 SV=1	Histidine kinase-, DNA gyrase B-, and HSP90-like ATPase;Response regulator receiver domain;His Kinase A (phospho-acceptor) domain;CHASE domain	-	-	-	K14489|AHK2_3_4; arabidopsis histidine kinase 2/3/4 (cytokinin receptor) [EC:2.7.13.3]	ko04075(Environmental Information Processing)	7.81	7.67	7.72	17.87	17.84	17.81	45.89	43.68	44.7	32.49	33.7	33.09
TR128903_c0_g1	protein SIEVE ELEMENT OCCLUSION B-like [Phoenix dactylifera]	Protein SIEVE ELEMENT OCCLUSION B OS=Arabidopsis thaliana OX=3702 GN=SEOB PE=1 SV=1	Sieve element occlusion C-terminus;Sieve element occlusion N-terminus	-	-	-	-	-	0.4	0.47	0.7	0.05	0.02	0	0.31	0.27	0.21	0.03	0.05	0.13
TR12895_c0_g1	complexin 2, isoform CRA_a [Homo sapiens]|EAW61367.1 complexin 2, isoform CRA_a [Homo sapiens]	-	-	vesicle-mediated transport;secretion;transport;exocytosis;biological_process;cellular process;membrane docking;secretion by cell;vesicle docking;localization;establishment of localization;organelle localization;cellular localization;exocytic process;organelle localization by membrane tethering;cell-cell signaling;cell communication;signaling;anterograde trans-synaptic signaling;synaptic signaling…	molecular_function;binding;protein binding	intracellular;cellular_component;membrane;cell;cytoplasm;SNARE complex;protein-containing complex;intracellular part;membrane part;cytoplasmic part;cell part;membrane protein complex;synaptobrevin 2-SNAP-25-syntaxin-3-complexin complex	-	-	1.34	0.49	0.47	0.1	0.06	0.1	0.39	0.16	0.02	0.15	0.04	0
TR1290_c1_g1	-	-	-	-	-	-	-	-	12.15	13.16	11.06	1.91	1.66	2.82	1.61	3.05	3.03	1.07	1.16	1.53
TR1290_c2_g1	hypothetical protein AQUCO_00700660v1 [Aquilegia coerulea]	ABSCISIC ACID-INSENSITIVE 5-like protein 7 OS=Arabidopsis thaliana OX=3702 GN=ABF4 PE=1 SV=1	-	-	-	-	K14432|ABF; ABA responsive element binding factor	ko04075(Environmental Information Processing)	35.27	35.88	37.24	51.42	52.66	49.16	47.31	47.53	48.09	98.99	97.37	93.96
TR129007_c0_g1	PREDICTED: universal stress protein PHOS32 isoform X1 [Vitis vinifera]	-	-	-	-	-	-	-	74.8	92.9	78.3	0.83	1.49	0.83	69.96	69.05	67.64	1.71	1.14	2.58
TR12902_c0_g1	hypothetical protein AQUCO_02400149v1 [Aquilegia coerulea]	Protein HYPER-SENSITIVITY-RELATED 4 OS=Arabidopsis thaliana OX=3702 GN=HSR4 PE=2 SV=1	Domain associated at C-terminal with AAA;ATPase family associated with various cellular activities (AAA)	-	-	-	-	-	21.36	20.93	23.77	13.8	14.91	13.23	10.23	9.84	9.41	30.32	33.62	27.21
TR12907_c0_g2	-	-	-	-	-	-	-	-	0.36	0.46	0.48	1.77	1.9	1.57	0.33	0.66	0.89	0.59	0.35	0.32
TR12911_c0_g1	PREDICTED: apoptosis regulator BAX isoform X1 [Peromyscus maniculatus bairdii]	-	Apoptosis regulator proteins, Bcl-2 family	-	-	-	-	-	2.16	0.06	0.65	0	0	0.07	0.14	0.21	0.07	0	0.04	0
TR129141_c0_g1	all-trans-13,14-dihydroretinol saturase, isoform CRA_b [Rattus norvegicus]	Prolycopene isomerase, chloroplastic OS=Solanum lycopersicum OX=4081 GN=CRTISO PE=1 SV=1	NAD(P)-binding Rossmann-like domain;Flavin containing amine oxidoreductase;FAD binding domain	metabolic process;biological_process;retinoid metabolic process;alcohol metabolic process;lipid metabolic process;isoprenoid metabolic process;terpenoid metabolic process;cellular process;regulation of hormone levels;diterpenoid metabolic process;primary alcohol metabolic process;cellular hormone metabolic process;hormone metabolic process;cellular metabolic process;primary metabolic process;cell…	molecular_function;catalytic activity;oxidoreductase activity;oxidoreductase activity, acting on the CH-CH group of donors;all-trans-retinol 13,14-reductase activity	intracellular;cellular_component;membrane;cell;nucleus;nuclear envelope;cytoplasm;endoplasmic reticulum;intracellular membrane-bounded organelle;endomembrane system;outer membrane;organelle membrane;nuclear membrane;organelle envelope;organelle outer membrane;envelope;organelle subcompartment;nuclear outer membrane-endoplasmic reticulum membrane network;organelle;membrane-bounded organelle;intrac…	-	-	1.48	0.43	0.31	0.04	0.18	0.06	0.28	0.19	0.1	0.04	0.05	0.08
TR12915_c0_g1	eukaryotic translation initiation factor 3 subunit F [Rattus norvegicus]	Eukaryotic translation initiation factor 3 subunit F OS=Arabidopsis thaliana OX=3702 GN=TIF3F1 PE=1 SV=1	JAB1/Mov34/MPN/PAD-1 ubiquitin protease;Maintenance of mitochondrial structure and function	-	-	-	K03249|EIF3F; translation initiation factor 3 subunit F	ko03013(Genetic Information Processing)	3.14	0.74	0.75	0.15	0.14	0.21	0.21	0.48	0.44	0	0.17	0
TR12919_c0_g1	PREDICTED: leucine-rich repeat extensin-like protein 5 [Nelumbo nucifera]	-	PB1 domain	-	-	-	-	-	0.22	0.45	0.65	0.81	0.59	0.54	0.16	0.2	0.2	0.59	0.82	0.87
TR129273_c0_g1	-	-	-	-	-	-	-	-	68	74.43	70.08	36.22	34.23	34.82	27.12	27.31	28.03	9.46	7.5	6.17
TR12928_c0_g1	Proton-dependent oligopeptide transporter family [Macleaya cordata]	Protein NRT1/ PTR FAMILY 4.4 OS=Arabidopsis thaliana OX=3702 GN=NPF4.4 PE=2 SV=1	POT family	-	-	-	-	-	0.03	0	0.03	0.08	0.09	0.12	2.33	2.22	2.06	1.43	0.85	0.7
TR12938_c0_g1	PREDICTED: bidirectional sugar transporter SWEET16-like isoform X1 [Nelumbo nucifera]	-	-	-	-	-	-	-	2.23	1.26	2.27	0.72	1.19	0.56	2.83	4.1	4.97	1.81	1.33	1.12
TR12938_c1_g3	-	-	-	-	-	-	-	-	0.21	0	0	0.35	0	0.25	1.8	2.41	2.99	2.91	2.96	3.07
TR12939_c0_g1	PREDICTED: pollen-specific protein C13-like [Nelumbo nucifera]	Olee1-like protein OS=Betula pendula OX=3505 PE=2 SV=1	-	-	-	-	-	-	5.21	6.32	5.07	7.7	8.2	8.15	12.85	13.14	12.26	31.63	30.25	32.62
TR1294_c0_g2	FTH1 protein [Homo sapiens]|AIC54404.1 FTH1, partial [synthetic construct]|SJX30046.1 unnamed protein product, partial [Human ORFeome Gateway entry vector]	-	-	-	-	-	-	-	28.82	9.9	7.23	5.51	3.81	4.45	11.93	4.75	1.97	3.78	1.75	3.23
TR12940_c0_g1	hypothetical protein AQUCO_04900152v1 [Aquilegia coerulea]	VAN3-binding protein OS=Arabidopsis thaliana OX=3702 GN=VAB PE=1 SV=1	-	-	-	-	-	-	1.73	1.36	1.57	1.88	2.06	2.24	0.58	0.7	0.6	1.2	1.13	1.38
TR12944_c0_g1	T-complex protein 1 subunit beta isoform 2 [Homo sapiens]|XP_004053598.1 PREDICTED: T-complex protein 1 subunit beta isoform X2 [Gorilla gorilla gorilla]|XP_008002180.1 PREDICTED: T-complex protein 1 subunit beta isoform X2 [Chlorocebus sabaeus]|XP_009424054.1 T-complex protein 1 subunit beta isoform X2 [Pan troglodytes]|XP_011784695.1 PREDICTED: T-complex protein 1 subunit beta isoform X2 [Colob…	T-complex protein 1 subunit beta OS=Arabidopsis thaliana OX=3702 GN=CCT2 PE=1 SV=1	TCP-1/cpn60 chaperonin family;TCP-1/cpn60 chaperonin family	-	-	-	-	-	2.67	0.63	0.52	0.23	0.15	0.21	0.51	0.33	0.28	0.11	0.05	0.11
TR12945_c0_g1	growth hormone-inducible transmembrane protein [Mus musculus]|NP_001186051.1 growth hormone-inducible transmembrane protein [Mus musculus]|NP_001346831.1 growth hormone-inducible transmembrane protein [Mus musculus]|Q91VC9.1 RecName: Full=Growth hormone-inducible transmembrane protein	-	Inhibitor of apoptosis-promoting Bax1	cell death;programmed cell death;biological_process;cellular process;apoptotic process	-	intracellular;cellular_component;membrane;mitochondrion;extracellular region;extracellular space;cell;cytoplasm;mitochondrial envelope;intracellular membrane-bounded organelle;organelle inner membrane;organelle membrane;intrinsic component of membrane;mitochondrial membrane;organelle envelope;envelope;vesicle;organelle;membrane-bounded organelle;intracellular organelle;extracellular organelle;ext…	-	-	2.71	0.44	0.5	0.19	0.1	0.31	0.43	0.32	0.24	0.03	0.08	0.14
TR12946_c0_g1	unnamed protein product, partial [Mus musculus]	-	-	-	-	-	-	-	1.07	0.31	0.21	0.01	0.04	0.14	0.1	0.09	0.09	0.15	0	0
TR12947_c0_g1	WRC [Macleaya cordata]	Growth-regulating factor 6 OS=Oryza sativa subsp. japonica OX=39947 GN=GRF6 PE=2 SV=2	WRC;QLQ	-	-	-	-	-	0.2	0.3	0.42	0.08	0.15	0	0.79	0.46	0.63	0.28	0.4	0.23
TR12949_c0_g1	Glycoside hydrolase [Macleaya cordata]	Xyloglucan endotransglucosylase/hydrolase protein 9 OS=Arabidopsis thaliana OX=3702 GN=XTH9 PE=2 SV=2	Glycosyl hydrolases family 16;Xyloglucan endo-transglycosylase (XET) C-terminus	-	-	-	-	-	64.76	68.94	68.27	54.75	59.4	60.25	7.78	7.82	7.82	19.54	21.15	19.02
TR129496_c0_g1	hypothetical protein BVC80_1547g27 [Macleaya cordata]	-	-	-	-	-	-	-	1.13	1.37	1.23	3.72	4.25	4.98	0.8	1.03	0.64	0.8	0.7	1.65
TR12950_c0_g1	PREDICTED: neurabin-2 [Saimiri boliviensis boliviensis]	-	PDZ domain (Also known as DHR or GLGF)	-	-	-	-	-	2.41	0.75	1.05	0.06	0.14	0.14	0.47	0.22	0.02	0.1	0.1	0.03
TR12952_c0_g1	uncharacterized protein LOC107268379 [Cephus cinctus]	-	-	-	-	-	-	-	81.44	39.76	42.4	9.86	14.7	13.69	38.8	3.82	13.97	13.25	5	3.27
TR12956_c0_g1	hypothetical protein AQUCO_00300810v1 [Aquilegia coerulea]	Cullin-1 OS=Arabidopsis thaliana OX=3702 GN=CUL1 PE=1 SV=1	-	-	-	-	-	-	1.15	1.49	1.61	2.3	2.2	2.01	0.81	0.82	0.88	0.33	0.44	0.29
TR129623_c0_g1	-	-	-	-	-	-	-	-	0.91	1.29	0.71	0	0	0	0	0	0	0	0	0
TR12963_c0_g1	PREDICTED: aquaporin NIP6-1 [Nelumbo nucifera]	Aquaporin NIP6-1 OS=Arabidopsis thaliana OX=3702 GN=NIP6-1 PE=1 SV=1	Major intrinsic protein	-	-	-	-	-	0.48	0.36	0.28	0.1	0.35	0.32	0.18	0.2	0.24	1.68	1.65	1.86
TR129644_c0_g1	hypothetical protein BWI92_26365 [Flectobacillus sp. BAB-3569]	-	-	-	-	-	-	-	11.25	7.47	37.74	0.72	2.35	3.65	4.18	0.51	10.03	0.65	1.79	2.63
TR12967_c0_g1	Mad3/BUB1 homology region 1 [Macleaya cordata]	Mitotic spindle checkpoint protein BUBR1 OS=Arabidopsis thaliana OX=3702 GN=BUBR1 PE=1 SV=2	Mad3/BUB1 homology region 1	-	-	-	-	-	0.93	0.9	0.71	1.19	1.17	1.25	0.2	0.11	0.26	3.49	3.63	3.01
TR129686_c0_g1	PREDICTED: BON1-associated protein 2 [Nelumbo nucifera]	-	C2 domain	-	-	-	-	-	3.77	3.51	4.92	5.46	5.69	6.29	2.91	2.84	2.25	2.87	2.95	2.62
TR12972_c0_g1	PREDICTED: uncharacterized protein LOC104613175 [Nelumbo nucifera]	-	Endonuclease/Exonuclease/phosphatase family	-	-	-	-	-	0.67	0.8	0.75	0.71	0.75	0.93	0.94	1.78	1.42	5.71	5.83	5.64
TR129723_c0_g1	STAS domain [Macleaya cordata]	Sulfate transporter 3.1 OS=Arabidopsis thaliana OX=3702 GN=SULTR3	Sulfate permease family	-	-	-	-	-	1.36	0.93	0.95	0.4	0.24	0.37	1.64	2.07	2.15	0.7	0.82	0.55
TR12978_c1_g1	Retrovirus-related Pol polyprotein from transposon TNT 1-94 [Vitis vinifera]	Putative pentatricopeptide repeat-containing protein At5g59200, chloroplastic OS=Arabidopsis thaliana OX=3702 GN=PCMP-E41 PE=3 SV=1	PPR repeat family;PPR repeat;PPR repeat	-	-	-	-	-	0	0.01	0.01	0.8	0.71	0.74	0	0.01	0.02	0	0	0.04
TR12983_c0_g1	calsyntenin-1 isoform 1 precursor [Mus musculus]|Q9EPL2.1 RecName: Full=Calsyntenin-1	-	Cadherin domain;Concanavalin A-like lectin/glucanases superfamily	cell growth;growth;biological_process;cellular process;cellular component organization;regulation of growth;regulation of biological process;regulation of cellular process;regulation of cellular component organization;biological regulation;cellular component organization or biogenesis;cellular ion homeostasis;cellular metal ion homeostasis;cellular homeostasis;cellular cation homeostasis;cellular…	molecular_function;binding;metal ion binding;ion binding;cation binding;amide binding;peptide binding;protein binding;cytoskeletal protein binding;calcium ion binding;kinesin binding;amyloid-beta binding;X11-like protein binding	plasma membrane;intracellular;cellular_component;membrane;extracellular region;extracellular space;cell;cytoplasm;intracellular membrane-bounded organelle;endomembrane system;intrinsic component of membrane;vesicle;asymmetric synapse;organelle;membrane-bounded organelle;intracellular organelle;extracellular organelle;extracellular region part;intracellular part;membrane part;cytoplasmic part;syna…	-	-	1.44	0.4	0.56	0.14	0.13	0.12	0.38	0.19	0.08	0.13	0.02	0
TR12986_c0_g1	-	-	-	-	-	-	-	-	0.89	1.18	0.72	0.23	0.25	0.45	1.94	1.84	1.47	0.4	0.19	0.08
TR1299_c0_g2	Raffinose synthase [Corchorus capsularis]	Probable galactinol--sucrose galactosyltransferase 2 OS=Arabidopsis thaliana OX=3702 GN=RFS2 PE=2 SV=2	Raffinose synthase or seed imbibition protein Sip1	-	-	-	K06617|E2.4.1.82; raffinose synthase [EC:2.4.1.82]	ko00052(Metabolism);ko01100(Metabolism)	8.93	9.73	9	14.9	12.96	14.77	24.33	26.9	21.54	49.31	47.23	48.37
TR1299_c1_g1	Cytochrome P450 [Macleaya cordata]	Cytochrome P450 98A2 OS=Glycine max OX=3847 GN=CYP98A2 PE=2 SV=1	Cytochrome P450;Cytochrome P450	-	-	-	-	-	231.62	227.99	227.11	213.88	214.33	214.26	141.94	143.91	146.72	401.35	402.95	396.09
TR1299_c2_g1	-	-	-	-	-	-	-	-	1.97	2.43	2.66	4.77	4.99	5.16	2.84	3.19	3.81	5.08	4.25	3.32
TR1299_c3_g1	hypothetical protein AQUCO_00300170v1 [Aquilegia coerulea]	-	-	-	-	-	-	-	1.74	2.17	2.15	1.76	1.64	1.2	4.13	4.08	4.28	3.96	4.31	2.71
TR1299_c4_g1	hypothetical protein CUMW_287840, partial [Citrus unshiu]	-	-	-	-	-	-	-	0.96	0.24	0.58	1.01	0.27	0.58	0	0.28	0	32.45	38.88	34.69
TR12990_c0_g1	PREDICTED: CASP-like protein 5B3 isoform X1 [Nelumbo nucifera]	CASP-like protein 5B3 OS=Arabidopsis thaliana OX=3702 GN=At3g23200 PE=2 SV=1	Domain of unknown function (DUF588)	-	-	-	-	-	1.74	2.04	2.41	2.67	2.9	3.08	6.34	6.8	6.81	6.57	5.76	6.61
TR12995_c0_g1	Plastocyanin-like [Macleaya cordata]	Basic blue protein OS=Arabidopsis thaliana OX=3702 GN=ARPN PE=2 SV=2	Plastocyanin-like domain	-	-	-	-	-	6.52	3.65	3.81	5.83	6.6	5.75	9.78	9.49	10.06	1.63	2.54	3.16
TR13_c1_g1	hypothetical protein SOVF_081470, partial [Spinacia oleracea]	Suppressor of RPS4-RLD 1 OS=Arabidopsis thaliana OX=3702 GN=SRFR1 PE=1 SV=1	-	-	-	-	-	-	3.65	3.82	3.68	1.71	1.78	1.85	1.19	1.03	1.16	2.93	2.72	3.13
TR1300_c1_g1	-	-	-	-	-	-	-	-	1.97	2.28	1.47	13.21	12.8	12.6	2.79	2.13	2.83	17.99	19.06	19.48
TR1300_c2_g1	Major facilitator superfamily [Macleaya cordata]	Probable anion transporter 3, chloroplastic OS=Arabidopsis thaliana OX=3702 GN=ANTR3 PE=2 SV=2	Major Facilitator Superfamily;Sugar (and other) transporter;Major Facilitator Superfamily;Sugar (and other) transporter	-	-	-	-	-	49.75	53.16	50.38	45.24	45.29	46.42	37.91	41.53	37.28	14.81	15.29	15.22
TR1300_c3_g1	hypothetical protein AQUCO_04100071v1 [Aquilegia coerulea]	LEAF RUST 10 DISEASE-RESISTANCE LOCUS RECEPTOR-LIKE PROTEIN KINASE-like 1.4 OS=Arabidopsis thaliana OX=3702 GN=LRK10L-1.4 PE=2 SV=2	Protein tyrosine kinase;Protein kinase domain	-	-	-	-	-	10.38	10	9.32	9.8	7.88	8.67	24.5	22.59	24.56	41.02	42.04	39.67
TR13000_c1_g1	PREDICTED: probable disease resistance protein At5g66900 [Nelumbo nucifera]	-	-	-	-	-	-	-	5.27	6.22	4.69	0	1.03	0	13.41	7.71	12.01	1.51	0	1.43
TR13004_c0_g2	-	-	Leucine rich repeat;Leucine Rich repeats (2 copies);Leucine Rich Repeat	-	-	-	-	-	11.16	11.97	11.24	35.1	34.91	34.4	23.69	25.83	23.57	16.5	18.89	19.45
TR13011_c0_g1	-	-	-	-	-	-	-	-	9.17	4.51	7.02	9.33	10.13	11.43	1.18	1.25	2.1	3.47	2.97	3.17
TR1302_c0_g3	hypothetical protein AQUCO_03200004v1 [Aquilegia coerulea]	-	Cotton fibre expressed protein	-	-	-	-	-	24.93	24.88	29.07	19.99	20.44	22.17	36.3	35.65	37.11	284.41	279.68	275.5
TR13028_c3_g2	uncharacterized protein LOC113340963 [Papaver somniferum]	-	-	-	-	-	-	-	2.7	3.54	3.17	2.97	3.25	2.78	0.57	0.48	0.97	0.75	0.68	0.66
TR13029_c0_g1	PREDICTED: uncharacterized protein LOC104586931 [Nelumbo nucifera]	-	-	-	-	-	-	-	0.9	0.68	0.93	1.43	1.13	1.18	0.89	1.31	1.36	4.37	4.73	4.44
TR13038_c0_g1	ketol-acid reductoisomerase, chloroplastic-like [Cucurbita moschata]	Ketol-acid reductoisomerase, chloroplastic OS=Arabidopsis thaliana OX=3702 GN=At3g58610 PE=1 SV=2	-	-	-	-	-	-	46.3	66.89	54.29	54.19	59.19	62.79	24.81	29.73	27.88	33.74	25.16	31.71
TR13039_c1_g1	-	-	-	-	-	-	-	-	0.32	1.17	0.83	2.9	1.8	2.96	0.52	0.51	0.62	1.47	1.06	1.67
TR13041_c0_g1	nascent polypeptide-associated complex subunit alpha isoform X2 [Terrapene mexicana triunguis]	Nascent polypeptide-associated complex subunit alpha-like protein 4 OS=Arabidopsis thaliana OX=3702 GN=At4g10480 PE=1 SV=1	-	-	-	-	-	-	1.52	0.66	0.39	0	0	0.08	0.23	0.3	0.08	0.09	0.09	0
TR13045_c0_g1	PREDICTED: plant intracellular Ras-group-related LRR protein 6 [Fragaria vesca subsp. vesca]	Plant intracellular Ras-group-related LRR protein 6 OS=Arabidopsis thaliana OX=3702 GN=PIRL6 PE=2 SV=1	Leucine Rich repeats (2 copies);Leucine rich repeat;Leucine Rich Repeat	-	-	-	-	-	0.11	0.4	0.08	0	0.04	0.08	1.59	1.84	1.35	0	0.05	0
TR1305_c0_g3	-	-	-	-	-	-	-	-	2.75	1.32	2.07	0.09	0.25	0.13	3.23	3.43	3.42	0.16	0.3	0.16
TR1305_c1_g1	protein of unknown function DUF239 [Macleaya cordata]	-	-	-	-	-	-	-	1.27	1.26	1.29	1.1	1.04	1.27	3.52	3.1	3.24	0.91	0.83	0.77
TR1305_c2_g1	hypothetical protein BVC80_1835g658 [Macleaya cordata]	-	-	-	-	-	-	-	24.08	25.38	27.12	64.16	64.79	64.74	22.8	21.13	22.12	16.44	15.6	15.7
TR1305_c3_g1	hypothetical protein AQUCO_02000047v1 [Aquilegia coerulea]	ACT domain-containing protein ACR2 OS=Arabidopsis thaliana OX=3702 GN=ACR2 PE=4 SV=1	-	-	-	-	-	-	99.22	100.24	97.63	258.07	252.6	251.52	493.9	490.1	479.6	913.13	912.7	920.22
TR13054_c1_g1	Auxin-induced protein [Macleaya cordata]	-	Auxin responsive protein	-	-	-	K14488|SAUR; SAUR family protein	ko04075(Environmental Information Processing)	0.3	0.61	0.36	0.91	0.57	0.47	2.25	3.6	2.78	0.29	1.32	1.31
TR13054_c2_g1	Photosystem I PsaG/PsaK protein [Macleaya cordata]	Photosystem I reaction center subunit V, chloroplastic OS=Arabidopsis thaliana OX=3702 GN=PSAG PE=1 SV=1	Photosystem I psaG / psaK	-	-	-	K08905|psaG; photosystem I subunit V	ko00195(Metabolism)	30.97	32.56	30.25	11.11	10.88	9.57	6.8	6.98	6.59	2.5	2.98	2.69
TR1306_c0_g2	aconitate hydratase, cytoplasmic [Citrus clementina]|XP_006475065.1 aconitate hydratase, cytoplasmic [Citrus sinensis]|ESR65617.1 hypothetical protein CICLE_v10007338mg [Citrus clementina]|KDO62731.1 hypothetical protein CISIN_1g001863mg [Citrus sinensis]	Putative aconitate hydratase, cytoplasmic OS=Oryza sativa subsp. japonica OX=39947 GN=Os08g0191100 PE=3 SV=1	Aconitase C-terminal domain	-	-	-	-	-	3.32	3.41	3.31	5.16	4.88	6.33	10.92	13.41	10.92	3.82	3.54	4.65
TR13066_c0_g1	Transposon Tf2-12 polyprotein [Vitis vinifera]	RNA-directed DNA polymerase homolog OS=Oenothera berteroana OX=3950 PE=4 SV=1	Reverse transcriptase (RNA-dependent DNA polymerase);Retrotransposon gag protein;Retroviral aspartyl protease	-	-	-	-	-	0.53	0.66	0.41	0.59	0.45	0.65	0.8	0.82	0.81	0.23	0.27	0.35
TR13067_c0_g1	PREDICTED: 30S ribosomal protein S31, chloroplastic [Nelumbo nucifera]	30S ribosomal protein S31, chloroplastic OS=Arabidopsis thaliana OX=3702 GN=RPS31 PE=1 SV=1	Ribosomal protein S31e	-	-	-	-	-	15.05	13.85	15.86	25.07	23.05	24.49	9.17	8.85	11.02	10.93	10.35	8.49
TR13075_c2_g1	-	-	-	-	-	-	-	-	0.68	0.84	0.2	2.29	2.37	1.71	0.2	0	0	0	0	0
TR1308_c2_g1	-	-	-	-	-	-	-	-	0	0	0.42	0	0	0	7.85	8.7	6.78	0	0.12	0.26
TR1309_c1_g1	LRAT-like domain [Macleaya cordata]	-	-	-	-	-	-	-	923.42	957.58	949.9	1514.01	1480.57	1522.6	701.87	706.3	677.4	276.67	251.09	273.18
TR1309_c10_g1	-	-	-	-	-	-	-	-	5.39	7.46	5.34	4.72	4.57	4.19	1.41	1.1	2.22	1.2	0.95	0.67
TR13093_c0_g1	-	-	-	-	-	-	-	-	0	0.17	0.2	3.41	4.94	3.5	1.21	0.93	1.55	0.25	0.59	0.75
TR13098_c0_g1	Protein of unknown function DUF3143 [Macleaya cordata]	-	Protein of unknown function (DUF3143)	-	-	-	-	-	17.97	16.04	19.9	20.88	17.4	18.05	15.54	16.8	17.08	29.19	30.64	28.4
TR131_c0_g1	Leucine-rich repeat [Macleaya cordata]	Plant intracellular Ras-group-related LRR protein 4 OS=Arabidopsis thaliana OX=3702 GN=PIRL4 PE=1 SV=1	Leucine rich repeat;Leucine Rich repeats (2 copies)	-	-	-	-	-	1.81	1.81	1.93	7.84	7.25	8.34	2.28	2.46	3.17	6.88	7.81	7.56
TR131_c1_g1	plant intracellular Ras-group-related LRR protein 6-like, partial [Ziziphus jujuba]	Plant intracellular Ras-group-related LRR protein 6 OS=Arabidopsis thaliana OX=3702 GN=PIRL6 PE=2 SV=1	Leucine rich repeat	-	-	-	-	-	3.94	4.41	3.92	1.67	1.81	2.2	2.66	2.95	2.6	0.61	0.68	0.7
TR1310_c0_g1	hevamine-A-like [Camellia sinensis]	Hevamine-A OS=Hevea brasiliensis OX=3981 PE=1 SV=2	Glycosyl hydrolases family 18	-	-	-	K01183|E3.2.1.14; chitinase [EC:3.2.1.14]	ko00520(Metabolism);ko01100(Metabolism)	2.54	2.81	2.78	3.37	3.58	3.67	1.61	2.14	1.61	4.49	4.92	5.1
TR13106_c0_g1	aspartyl protease family protein At5g10770-like [Hevea brasiliensis]	-	-	-	-	-	-	-	29.97	27.94	33.59	15.76	16.36	15.43	100.28	113.28	102.19	78.85	73.09	75.17
TR13106_c0_g2	aspartyl protease family protein At5g10770-like [Hevea brasiliensis]	-	-	-	-	-	-	-	2.59	1.64	1.61	1.62	1.22	2.71	8.09	8.91	6.62	7.45	4.78	4.4
TR1311_c0_g1	protein translation factor SUI1 homolog 2 [Glycine max]|XP_028245971.1 protein translation factor SUI1 homolog 2-like [Glycine soja]|KHM99561.1 Protein translation factor SUI1 like 2 [Glycine soja]|KRH46184.1 hypothetical protein GLYMA_08G316700 [Glycine max]|RZB99784.1 Protein translation factor SUI1-like 2 [Glycine soja]	Protein translation factor SUI1 homolog OS=Oryza sativa subsp. indica OX=39946 GN=GOS2 PE=2 SV=1	Translation initiation factor SUI1	-	-	-	K03113|EIF1, SUI1; translation initiation factor 1	ko03013(Genetic Information Processing)	1018.92	1017.4	986.94	1173.85	1193.76	1212	678.13	680.48	687.2	285.15	281.32	281.29
TR13110_c0_g1	hypothetical protein Maq22A_c06145 [Methylobacterium aquaticum]|BAQ47927.1 hypothetical protein Maq22A_c25105 [Methylobacterium aquaticum]	-	-	-	-	-	-	-	20.45	15.75	31.37	4.81	2.62	5.32	15.46	0.77	4.58	5.33	4.36	2.87
TR131112_c0_g1	60S ribosomal protein L27 [Cinnamomum micranthum f. kanehirae]	60S ribosomal protein L27 OS=Pisum sativum OX=3888 GN=RPL27 PE=2 SV=1	-	-	-	-	K02901|RP-L27e, RPL27; large subunit ribosomal protein L27e	ko03010(Genetic Information Processing)	54.74	67.56	47.5	26.72	20.54	25.39	9.18	13.62	18.92	18.81	23.63	25.52
TR13116_c0_g1	-	-	-	-	-	-	-	-	0.51	0.44	0.17	0.3	0.08	0.17	1.71	1.32	1.75	0.21	0.45	0.53
TR13125_c0_g1	PREDICTED: uncharacterized protein LOC108980949 [Juglans regia]	-	Domain of unknown function (DUF4228)	-	-	-	-	-	1.08	0.58	0.94	2.75	3.08	3.37	8.57	7.53	8.14	12.73	12.35	11.99
TR13131_c0_g1	Peptidase A1 [Macleaya cordata]	Aspartyl protease family protein At5g10770 OS=Arabidopsis thaliana OX=3702 GN=At5g10770 PE=2 SV=1	Xylanase inhibitor C-terminal;Eukaryotic aspartyl protease	-	-	-	-	-	0.72	0.51	0.61	0.14	0.17	0.11	0.67	0.37	0.46	0.41	0.28	0.14
TR13138_c0_g1	-	-	-	-	-	-	-	-	12.94	15.02	13.27	13.08	12.73	13.08	9.72	9.09	9.95	16.32	17.44	17.94
TR1314_c0_g1	Phosphoesterase domain [Macleaya cordata]	Probable inactive purple acid phosphatase 1 OS=Arabidopsis thaliana OX=3702 GN=PAP1 PE=2 SV=1	Calcineurin-like phosphoesterase;Iron/zinc purple acid phosphatase-like protein C;Purple acid Phosphatase, N-terminal domain	-	-	-	-	-	24.22	25.47	23.85	23.24	25.01	24.16	13.2	12.26	12.54	17.25	16.45	17.78
TR13140_c1_g1	beta-amylase 1, chloroplastic-like [Glycine soja]|RZB62111.1 Beta-amylase 1, chloroplastic [Glycine soja]	Beta-amylase 1, chloroplastic OS=Arabidopsis thaliana OX=3702 GN=BAM1 PE=1 SV=1	Glycosyl hydrolase family 14	-	-	-	-	-	23.98	28.15	25.42	103.15	97.64	102.5	359.41	368.75	311.23	742.92	729.99	740.71
TR13143_c0_g1	PREDICTED: EID1-like F-box protein 3 [Nelumbo nucifera]	EID1-like F-box protein 3 OS=Arabidopsis thaliana OX=3702 GN=EDL3 PE=2 SV=1	-	-	-	-	-	-	1.66	2.47	2.36	0.4	0.34	0.7	1.21	0.89	0.81	2.71	2.52	3.16
TR13149_c0_g1	-	Sodium/calcium exchanger NCL OS=Arabidopsis thaliana OX=3702 GN=NCL PE=2 SV=1	-	-	-	-	-	-	2.61	2.28	1.43	0.29	0	0.4	0.61	0.54	0.1	0.12	0.06	0
TR1315_c2_g1	-	-	-	-	-	-	-	-	108.05	105.07	111.03	39.98	41.49	44.37	74.23	84.39	90.98	28.15	27.46	30.63
TR13151_c0_g1	-	-	-	-	-	-	-	-	7.6	7.6	8.07	1.89	5.08	3.23	7.15	7.03	5.36	1.51	0.28	0.6
TR1316_c3_g1	PREDICTED: fasciclin-like arabinogalactan protein 16 [Nelumbo nucifera]	Fasciclin-like arabinogalactan protein 17 OS=Arabidopsis thaliana OX=3702 GN=FLA17 PE=2 SV=1	Fasciclin domain	-	-	-	-	-	12.52	11.89	11.42	19.64	19.18	19.7	38.73	40	36.19	107.4	102.08	103.88
TR1316_c3_g3	fasciclin-like arabinogalactan protein 16 [Momordica charantia]	Fasciclin-like arabinogalactan protein 18 OS=Arabidopsis thaliana OX=3702 GN=FLA18 PE=2 SV=1	-	-	-	-	-	-	11.25	13.72	12.45	8.33	8.23	6.28	7.96	6.46	7.82	14.75	12.93	14.13
TR13167_c0_g1	hypothetical protein BVC80_9055g9 [Macleaya cordata]	-	-	-	-	-	-	-	24.59	22.97	25.09	23.68	26.9	23.5	6.74	7.24	10.01	6.56	3.78	3.48
TR1317_c0_g1	PREDICTED: pectinesterase [Nelumbo nucifera]	Pectinesterase/pectinesterase inhibitor OS=Ficus pumila var. awkeotsang OX=204231 PE=1 SV=1	Pectinesterase;Plant invertase/pectin methylesterase inhibitor	-	-	-	K01051|E3.1.1.11; pectinesterase [EC:3.1.1.11]	ko00040(Metabolism);ko01100(Metabolism);ko02020(Environmental Information Processing)	99.05	98.81	101.96	75.61	73.53	76.1	205.88	212	200.56	545.18	538.92	546.45
TR1317_c3_g1	PREDICTED: protein trichome birefringence-like 38 [Nelumbo nucifera]	Protein trichome birefringence-like 38 OS=Arabidopsis thaliana OX=3702 GN=TBL38 PE=2 SV=1	GDSL/SGNH-like Acyl-Esterase family found in Pmr5 and Cas1p;PMR5 N terminal Domain	-	-	-	-	-	79.12	86.48	83.13	93.05	91.89	90.04	247.48	247.84	237.86	335.97	322.05	340.86
TR13174_c0_g1	Transcription factor GRAS [Corchorus olitorius]	Scarecrow-like protein 3 OS=Arabidopsis thaliana OX=3702 GN=SCL3 PE=1 SV=1	GRAS domain family	-	-	-	-	-	3.2	3.28	3.26	0.25	0.28	0.19	0.47	0.68	0.67	0.29	0.28	0.22
TR13177_c0_g1	hypothetical protein AQUCO_00900320v1 [Aquilegia coerulea]	Zeatin O-xylosyltransferase OS=Phaseolus vulgaris OX=3885 GN=ZOX1 PE=2 SV=1	-	-	-	-	-	-	22.73	25.29	19.02	17.09	19.5	16.32	42.27	47.21	44.46	15.87	14.19	12.45
TR1318_c0_g1	PREDICTED: cation/H(+) antiporter 20 [Nelumbo nucifera]	Cation/H(+) antiporter 20 OS=Arabidopsis thaliana OX=3702 GN=CHX20 PE=2 SV=1	Sodium/hydrogen exchanger family;Universal stress protein family	-	-	-	-	-	91.4	96.05	90.04	118.87	115.73	118.43	196.07	196.47	180.89	476.51	470.58	480.69
TR13188_c0_g1	phospholipase D3 [Mus musculus]|NP_001304284.1 phospholipase D3 [Mus musculus]|XP_006539705.1 PREDICTED: phospholipase D3 isoform X1 [Mus musculus]|XP_006539706.1 PREDICTED: phospholipase D3 isoform X1 [Mus musculus]|O35405.1 RecName: Full=Phospholipase D3	-	PLD-like domain;PLD-like domain;Phospholipase D Active site motif	metabolic process;lipid metabolic process;biological_process;catabolic process;primary metabolic process;organic substance metabolic process;organic substance catabolic process;lipid catabolic process	molecular_function;catalytic activity;phospholipase activity;phosphoric diester hydrolase activity;lipase activity;hydrolase activity;hydrolase activity, acting on ester bonds;phosphoric ester hydrolase activity;phospholipase D activity;N-acylphosphatidylethanolamine-specific phospholipase D activity	intracellular;cellular_component;membrane;extracellular region;extracellular space;cell;cytoplasm;intracellular membrane-bounded organelle;endomembrane system;intrinsic component of membrane;vesicle;organelle;membrane-bounded organelle;intracellular organelle;extracellular organelle;extracellular region part;intracellular part;membrane part;cytoplasmic part;cell part;extracellular vesicle;integra…	K16860|PLD3_4; phospholipase D3/4 [EC:3.1.4.4]	ko00564(Metabolism);ko00565(Metabolism);ko01100(Metabolism);ko01110(Metabolism)	2.82	0.72	0.8	0.14	0.16	0.05	0.52	0.2	0.23	0.13	0.03	0.03
TR13189_c0_g2	hypothetical protein G7K_1412-t1 [Saitoella complicata NRRL Y-17804]	-	-	-	-	-	-	-	14.71	12.51	7.27	0.19	2.62	0.95	3.04	0.71	0	0	2.18	1.25
TR1319_c0_g1	peroxidase P7-like protein [Cinnamomum micranthum f. kanehirae]	Peroxidase 52 OS=Arabidopsis thaliana OX=3702 GN=PER52 PE=2 SV=1	Peroxidase	-	-	-	K00430|E1.11.1.7; peroxidase [EC:1.11.1.7]	ko00940(Metabolism);ko01100(Metabolism);ko01110(Metabolism)	4.75	5.57	4.34	12.9	13.61	12.35	11.37	10.93	10.74	21.14	19.55	19.86
TR13198_c0_g1	hypothetical protein CQW23_08044 [Capsicum baccatum]	Protein RESPONSE TO LOW SULFUR 4 OS=Arabidopsis thaliana OX=3702 GN=LSU4 PE=2 SV=1	-	-	-	-	-	-	502.61	464.77	530.88	427.15	419.51	445.97	131.25	138.92	142.05	105.32	103.15	100.81
TR1320_c0_g1	hypothetical protein CKAN_02081400 [Cinnamomum micranthum f. kanehirae]	1-aminocyclopropane-1-carboxylate oxidase homolog 1 OS=Arabidopsis thaliana OX=3702 GN=At1g06620 PE=2 SV=1	2OG-Fe(II) oxygenase superfamily;non-haem dioxygenase in morphine synthesis N-terminal	-	-	-	-	-	3.34	3.34	3.14	1.67	1.48	2.18	4.81	5.26	4.3	0.76	0.82	0.76
TR132003_c0_g2	hypothetical protein AQUCO_00300815v1 [Aquilegia coerulea]	Protein SRG1 OS=Arabidopsis thaliana OX=3702 GN=SRG1 PE=2 SV=1	2OG-Fe(II) oxygenase superfamily;non-haem dioxygenase in morphine synthesis N-terminal	-	-	-	-	-	0.19	0	0.11	0	0	0	0.11	0.75	0.66	0	0.03	0
TR13215_c0_g1	Cell wall-associated hydrolase [Chromobacterium violaceum]	-	-	-	-	-	-	-	163.21	114.89	140.37	29.28	49.02	57.8	172.71	43.34	110.02	56.96	18.13	99.35
TR1322_c1_g1	PREDICTED: protein tesmin/TSO1-like CXC 4 [Nelumbo nucifera]	Protein tesmin/TSO1-like CXC 2 OS=Arabidopsis thaliana OX=3702 GN=TCX2 PE=1 SV=1	Tesmin/TSO1-like CXC domain, cysteine-rich domain	-	-	-	-	-	2.47	2.18	1.99	0.99	1.19	0.99	6.38	6.73	7.19	2.21	2.28	2.87
TR1322_c1_g2	CRC domain [Macleaya cordata]	Protein tesmin/TSO1-like CXC 2 OS=Arabidopsis thaliana OX=3702 GN=TCX2 PE=1 SV=1	Tesmin/TSO1-like CXC domain, cysteine-rich domain	-	-	-	-	-	0.31	0.56	0.26	0.45	0.47	0.48	2.68	2.51	2.8	1.22	0.86	0.76
TR13221_c0_g1	AMP-dependent synthetase/ligase [Macleaya cordata]	Long chain acyl-CoA synthetase 1 OS=Arabidopsis thaliana OX=3702 GN=LACS1 PE=2 SV=1	AMP-binding enzyme	-	-	-	K01897|ACSL, fadD; long-chain acyl-CoA synthetase [EC:6.2.1.3]	ko00061(Metabolism);ko00071(Metabolism);ko01100(Metabolism);ko01212(Metabolism);ko02024(Cellular Processes);ko03320(Organismal Systems);ko04146(Cellular Processes);ko04216(Cellular Processes);ko04714(Organismal Systems);ko04920(Organismal Systems)	4.47	4.45	4.31	1.95	1.84	2.25	2.44	1.51	2.05	4.45	4.99	4.85
TR13222_c0_g1	Protein kinase domain [Macleaya cordata]	Putative proline-rich receptor-like protein kinase PERK11 OS=Arabidopsis thaliana OX=3702 GN=PERK11 PE=2 SV=2	Protein kinase domain;Protein tyrosine kinase	-	-	-	-	-	0.84	0.58	0.82	0.85	1.13	1.15	2.09	1.36	1.25	2.65	2.99	2.78
TR13240_c0_g1	PREDICTED: uncharacterized protein LOC104586371 [Nelumbo nucifera]	UDP-N-acetylmuramoyl-L-alanyl-D-glutamate--2,6-diaminopimelate ligase MurE homolog, chloroplastic OS=Arabidopsis thaliana OX=3702 GN=MURE PE=1 SV=1	Mur ligase middle domain;Mur ligase family, glutamate ligase domain;Mur ligase family, catalytic domain	-	-	-	-	-	1.63	1.42	1.71	2	1.89	2.46	1.84	2.11	2.3	4.27	3.39	3.53
TR13245_c0_g1	dnaJ homolog subfamily A member 1 [Mus musculus]|NP_075223.1 dnaJ homolog subfamily A member 1 [Rattus norvegicus]|NP_001158143.1 dnaJ homolog subfamily A member 1 [Mus musculus]|NP_001158144.1 dnaJ homolog subfamily A member 1 [Mus musculus]|XP_006238161.1 PREDICTED: dnaJ homolog subfamily A member 1 isoform X1 [Rattus norvegicus]|XP_021077683.1 dnaJ homolog subfamily A member 1 [Mus pahari]|XP_…	DnaJ protein homolog OS=Cucumis sativus OX=3659 GN=DNAJ1 PE=2 SV=1	DnaJ C terminal domain;DnaJ domain;DnaJ central domain	biological_process;cellular process;reproduction;gamete generation;sexual reproduction;reproductive process;multicellular organismal process;multicellular organism reproduction;multi-organism reproductive process;male gamete generation;multicellular organismal reproductive process;multi-organism process;response to stress;response to temperature stimulus;response to abiotic stimulus;response to s…	protein binding;molecular_function;binding;signaling receptor binding;ion binding;cation binding;nucleotide binding;drug binding;purine nucleotide binding;adenyl nucleotide binding;ribonucleotide binding;purine ribonucleotide binding;adenyl ribonucleotide binding;purine ribonucleoside triphosphate binding;small molecule binding;anion binding;organic cyclic compound binding;carbohydrate derivative…	intracellular;cellular_component;extracellular region;extracellular space;cell;cytoplasm;intracellular membrane-bounded organelle;endomembrane system;vesicle;protein-containing complex;organelle;membrane-bounded organelle;intracellular organelle;extracellular organelle;extracellular region part;intracellular part;cytoplasmic part;cell part;catalytic complex;extracellular vesicle;transferase compl…	K09503|DNAJA2; DnaJ homolog subfamily A member 2	ko04141(Genetic Information Processing)	2.98	0.99	0.69	0.23	0.37	0.47	0.86	0.62	0.34	0.29	0.09	0.22
TR1325_c0_g1	Mlo-related protein [Macleaya cordata]	MLO-like protein 6 OS=Arabidopsis thaliana OX=3702 GN=MLO6 PE=2 SV=2	Mlo family;Mlo family;Mlo family	-	-	-	-	-	19.92	20.72	19.04	19.82	19.79	19.54	46.13	46.89	47.82	11.17	11.14	11.09
TR1325_c0_g2	3-beta hydroxysteroid dehydrogenase/isomerase [Macleaya cordata]	Dihydroflavonol 4-reductase OS=Arabidopsis thaliana OX=3702 GN=DFRA PE=1 SV=2	-	-	-	-	-	-	15.38	15.48	15.51	6.06	6.27	6.41	7.16	8.82	7.37	16.46	14.16	14.68
TR1325_c3_g1	Protein kinase domain [Macleaya cordata]	Probable inactive receptor kinase At1g48480 OS=Arabidopsis thaliana OX=3702 GN=RKL1 PE=2 SV=1	Protein kinase domain;Protein tyrosine kinase;Leucine Rich repeats (2 copies);Leucine rich repeat;Leucine rich repeat N-terminal domain	-	-	-	-	-	1.89	1.18	1.26	2.17	2.16	2.78	2.56	2.96	2.63	7.19	6.47	6.4
TR132684_c0_g1	PREDICTED: uncharacterized protein LOC108998522 [Juglans regia]	-	-	-	-	-	-	-	0	0	0	0	0	0	0.62	0.42	0.39	0	0	0
TR13269_c0_g1	-	-	-	-	-	-	-	-	0.05	0	0	1.02	0.42	0.87	1.44	2	1.62	0.77	0.74	1.01
TR1327_c1_g1	ubiquitin-40S ribosomal protein S27a isoform X1 [Bubalus bubalis]	Ubiquitin-40S ribosomal protein S27a OS=Solanum tuberosum OX=4113 GN=UBI3 PE=2 SV=2	Ubiquitin family;Ribosomal protein S27a;Ubiquitin-2 like Rad60 SUMO-like;Ubiquitin-like domain	-	-	-	K02977|RP-S27Ae, RPS27A, UBA80; ubiquitin-small subunit ribosomal protein S27Ae	ko03010(Genetic Information Processing);ko04120(Genetic Information Processing);ko04137(Cellular Processes)	62.22	12.29	13.05	3.25	2.96	6.03	11.09	6.39	4.7	1.83	1.49	3.49
TR13279_c0_g1	-	-	-	-	-	-	-	-	19.02	10.41	27.21	16.77	17.54	16.2	23.91	26.9	20.54	81.92	65.42	82.08
TR1328_c0_g1	Glycoside hydrolase [Macleaya cordata]	Furostanol glycoside 26-O-beta-glucosidase OS=Cheilocostus speciosus OX=49577 GN=F26G PE=1 SV=1	Glycosyl hydrolase family 1	-	-	-	-	-	1.64	0.64	1.05	4.27	4.47	3.95	14.22	16.32	16	10.4	10.43	10.22
TR13287_c0_g1	-	-	-	-	-	-	-	-	2.14	2.16	2.05	8.58	6.18	6.29	22.52	28.21	26.63	40.68	40.05	26.04
TR132928_c0_g1	-	-	-	-	-	-	-	-	0	0	0.37	3.62	3.09	4.46	0.38	0	0	0	0.21	0
TR13295_c0_g1	Aux/IAA11 [Carya cathayensis]	Auxin-responsive protein IAA13 OS=Arabidopsis thaliana OX=3702 GN=IAA13 PE=1 SV=2	-	-	-	-	-	-	12.19	9.9	11.11	3.92	3.68	4.59	3.81	5.4	5.7	2.78	2.16	1.61
TR13297_c0_g1	SAM dependent carboxyl methyltransferase [Macleaya cordata]	Probable S-adenosylmethionine-dependent methyltransferase At5g37970 OS=Arabidopsis thaliana OX=3702 GN=At5g37970 PE=3 SV=1	SAM dependent carboxyl methyltransferase	-	-	-	-	-	0.51	0.39	1.04	1.18	1.57	1.31	8.27	7.2	8.95	0.91	1.46	1.77
TR132977_c0_g1	-	-	-	-	-	-	-	-	0	0	0.08	0.57	0.62	0.4	0	0	0	0	0	0.1
TR1330_c0_g1	-	-	-	-	-	-	-	-	41.36	37.71	41.94	36.54	37.23	36.12	23.08	25	26.87	10.18	9.92	10.63
TR13300_c0_g2	Auxin efflux carrier [Macleaya cordata]	Protein PIN-LIKES 1 OS=Arabidopsis thaliana OX=3702 GN=PILS1 PE=2 SV=1	Membrane transport protein	-	-	-	-	-	4.94	5.68	4.98	2.95	2.3	1.95	6.02	5.04	6.07	3.97	3.01	3.12
TR1331_c0_g2	PREDICTED: GATA transcription factor 8-like [Nelumbo nucifera]	GATA transcription factor 8 OS=Arabidopsis thaliana OX=3702 GN=GATA8 PE=2 SV=1	GATA zinc finger	-	-	-	-	-	50.61	49.26	50.36	51.88	50	48.66	41.17	43.35	43.4	6.85	6.44	6.9
TR1331_c2_g2	-	-	-	-	-	-	-	-	7.66	8.09	8.44	72.09	73.77	74.76	26.45	27.54	29.9	27.19	26.76	28.35
TR13310_c0_g1	-	-	-	-	-	-	-	-	13.72	12.97	11.15	23.15	27.75	25.29	127.2	110.51	128.74	183.96	184.13	168.99
TR13318_c0_g1	probable glutathione S-transferase [Hevea brasiliensis]	Probable glutathione S-transferase parA OS=Nicotiana tabacum OX=4097 GN=PARA PE=2 SV=1	Glutathione S-transferase, C-terminal domain;Glutathione S-transferase, C-terminal domain	-	-	-	-	-	4.94	4.57	5.07	9.32	8.26	8.97	17.13	16.47	19.73	6.23	4.2	5.29
TR1332_c0_g2	hypothetical protein AQUCO_00200591v1 [Aquilegia coerulea]	-	Protein of unknown function (DUF1666)	-	-	-	-	-	32.33	29.91	35.48	19.12	19.69	19.38	13.74	14.48	15.17	2.02	1.43	1.79
TR13338_c0_g1	hypothetical protein AQUCO_04200103v1 [Aquilegia coerulea]	WAT1-related protein At5g64700 OS=Arabidopsis thaliana OX=3702 GN=At5g64700 PE=2 SV=1	EamA-like transporter family;EamA-like transporter family	-	-	-	-	-	0.93	1.48	1	0.26	0.28	0.33	1.98	2.6	2.27	0.56	1	0.66
TR1334_c0_g1	probable disease resistance protein At4g33300 [Camellia sinensis]	Probable disease resistance protein At4g33300 OS=Arabidopsis thaliana OX=3702 GN=At4g33300 PE=2 SV=3	NB-ARC domain;Arabidopsis broad-spectrum mildew resistance protein RPW8;Leucine Rich repeats (2 copies);Leucine rich repeat	-	-	-	-	-	20.02	20.17	21.5	24.68	25.88	26.56	30.67	33.8	32.65	14.06	13.94	13.47
TR13340_c0_g1	PREDICTED: disease resistance protein RPM1-like [Vitis vinifera]	-	-	-	-	-	-	-	13.48	16.96	16.83	7.99	8.12	5.17	22.39	21.8	17.82	11.02	9.06	8.85
TR133583_c0_g1	PREDICTED: cytochrome P450 CYP749A22-like [Populus euphratica]	-	-	-	-	-	-	-	11.75	24.1	20.51	22.24	24.31	23.34	11.59	6.9	7.05	10.89	13.45	10.75
TR13364_c1_g1	-	-	-	-	-	-	-	-	0.12	0.12	0.2	0.28	0	0.26	0.47	1.22	0.69	8.44	9.33	6.34
TR13369_c0_g1	-	-	-	-	-	-	-	-	2.75	4.3	4.49	7.07	6.27	6.04	0	1.29	0	0	0.21	0
TR13369_c0_g3	-	-	-	-	-	-	-	-	13.01	8.81	12.28	4.54	4.82	6.81	0.33	1.26	0.95	3.21	2.04	3.18
TR1337_c0_g1	hypothetical protein BVC80_8905g17 [Macleaya cordata]	Monofunctional riboflavin biosynthesis protein RIBA 2, chloroplastic OS=Arabidopsis thaliana OX=3702 GN=RIBA2 PE=1 SV=1	3,4-dihydroxy-2-butanone 4-phosphate synthase	-	-	-	-	-	3.58	4.26	4.81	6.48	5.76	6.38	8.32	8.48	8.79	14.89	17.04	15.86
TR1337_c1_g2	organic cation/carnitine transporter 4 [Prunus yedoensis var. nudiflora]	Organic cation/carnitine transporter 4 OS=Arabidopsis thaliana OX=3702 GN=OCT4 PE=2 SV=1	Sugar (and other) transporter;Major Facilitator Superfamily;Sugar (and other) transporter;Major Facilitator Superfamily	-	-	-	-	-	13.74	13.2	14.37	28.58	28.92	27.99	59.67	63.64	63.57	78.81	81.12	82.19
TR13371_c0_g1	Expansin 11, ALPHA 1.14,EXPA11 [Theobroma cacao]	Expansin-A11 OS=Arabidopsis thaliana OX=3702 GN=EXPA11 PE=2 SV=1	Lytic transglycolase	-	-	-	-	-	3.2	4.07	3.37	6.14	6.73	6.53	23.34	20.75	20.81	84.98	82.34	85.1
TR13373_c0_g1	Filament-like plant protein [Macleaya cordata]	Filament-like plant protein 4 OS=Arabidopsis thaliana OX=3702 GN=FPP4 PE=1 SV=1	Filament-like plant protein, long coiled-coil;Filament-like plant protein, long coiled-coil	-	-	-	-	-	1.72	1.65	1.88	2.54	2.65	3.01	0.81	0.74	0.53	0.27	0.36	0.24
TR13390_c0_g1	PREDICTED: extracellular ribonuclease LE-like [Nelumbo nucifera]	-	Ribonuclease T2 family	-	-	-	-	-	59.99	60.87	63.21	51.43	49.31	49.59	11.88	9.84	10.15	13.72	9.98	11.41
TR13394_c0_g3	Cellulose synthase [Macleaya cordata]	Cellulose synthase-like protein H1 OS=Oryza sativa subsp. japonica OX=39947 GN=CSLH1 PE=2 SV=2	Cellulose synthase;Glycosyl transferase family group 2;Cellulose synthase;Cellulose synthase	-	-	-	-	-	0.48	0.43	0.35	0.85	0.9	0.68	2.55	2.62	2.31	2.41	2.05	2.17
TR13394_c0_g5	Cellulose synthase-like protein [Actinidia chinensis var. chinensis]	-	-	-	-	-	-	-	0	0.06	0.08	0	0	0	0	0.07	0.22	1.23	0.94	0.67
TR13396_c0_g1	zinc finger protein [Macleaya cordata]	RING-H2 finger protein ATL8 OS=Arabidopsis thaliana OX=3702 GN=ATL8 PE=2 SV=2	Ring finger domain;RING-like zinc finger;Zinc finger, C3HC4 type (RING finger);RING-H2 zinc finger domain;Zinc finger, C3HC4 type (RING finger)	-	-	-	-	-	2.89	3.93	2.6	7.04	5.92	8.39	32.96	32.67	29.41	45.19	46.89	48.17
TR13401_c0_g1	-	-	-	-	-	-	-	-	0.35	0.55	0.41	0.04	0.11	0.17	0.98	0.64	0.89	0.64	0.37	0.21
TR13401_c1_g1	-	-	-	-	-	-	-	-	0.93	1	0.8	1.87	1.59	1.63	5.56	5.63	5.92	0.38	0.59	0.8
TR13402_c0_g1	hypothetical protein EGK_14768 [Macaca mulatta]	-	Class II histocompatibility antigen, beta domain;Immunoglobulin C1-set domain;Immunoglobulin domain;Immunoglobulin domain	-	-	-	-	-	1.96	0.33	0.19	0.04	0.09	0.09	0.13	0.21	0.03	0.08	0.02	0.08
TR13413_c0_g1	-	-	-	-	-	-	-	-	3.17	3.61	3.76	10.91	9.97	8.45	5.5	7.19	8.64	6.9	7.06	6.88
TR13419_c1_g1	hypothetical protein AQUCO_01100497v1 [Aquilegia coerulea]	-	Glycosyltransferase family 17	-	-	-	-	-	4.07	3.45	4.55	3.09	4.07	2.97	3.26	4.04	4.64	1.53	1.83	1.33
TR13423_c0_g1	Histone deacetylase superfamily [Macleaya cordata]	Histone deacetylase 15 OS=Arabidopsis thaliana OX=3702 GN=HDA15 PE=2 SV=2	Histone deacetylase domain	-	-	-	-	-	2.76	2.64	2.81	2.68	2.48	3.08	1.38	1.42	1.11	1.44	1.69	1.51
TR13427_c0_g1	-	-	-	-	-	-	-	-	8.46	6.56	7.71	0.19	0.13	0.13	0.27	0.12	0.42	1.85	1.26	1.52
TR1343_c0_g1	hypothetical protein AQUCO_00900692v1 [Aquilegia coerulea]	E3 ubiquitin-protein ligase PUB22 OS=Arabidopsis thaliana OX=3702 GN=PUB22 PE=1 SV=1	U-box domain	-	-	-	-	-	35.4	34.01	36.12	5.8	6.41	7	8.52	8.79	9.31	3.07	2.88	3.01
TR13447_c0_g1	PREDICTED: uncharacterized protein LOC104608622 [Nelumbo nucifera]	-	Protein of unknown function (DUF563)	-	-	-	-	-	0.86	0.87	0.69	0.83	0.83	0.79	2	2.03	2.06	0.78	0.49	0.48
TR13449_c0_g1	thyroid hormone receptor alpha isoform 1 [Mus musculus]|P63058.2 RecName: Full=Thyroid hormone receptor alpha	-	Zinc finger, C4 type (two domains);Ligand-binding domain of nuclear hormone receptor	skeletal system development;multicellular organism development;anatomical structure morphogenesis;animal organ morphogenesis;tissue development;biological_process;multicellular organismal process;developmental process;animal organ development;skeletal system morphogenesis;system development;anatomical structure development;cartilage development;connective tissue development;cell aggregation;uroge…	regulatory region nucleic acid binding;molecular_function;nucleic acid binding;DNA binding;double-stranded DNA binding;binding;transcription regulatory region DNA binding;sequence-specific DNA binding;organic cyclic compound binding;heterocyclic compound binding;sequence-specific double-stranded DNA binding;RNA binding;single-stranded RNA binding;DNA-binding transcription factor activity, RNA pol…	intracellular;cellular_component;cell;cytoplasm;intracellular membrane-bounded organelle;organelle;membrane-bounded organelle;intracellular organelle;intracellular part;cytoplasmic part;cell part;cytosol;mitochondrion;nucleus	-	-	2.18	0.31	0.75	0.02	0.24	0.19	0.47	0.21	0.06	0.1	0.03	0.07
TR13454_c0_g1	hypothetical protein AQUCO_00100565v1 [Aquilegia coerulea]	Probable sulfate transporter 3.4 OS=Arabidopsis thaliana OX=3702 GN=SULTR3	Sulfate permease family;STAS domain	-	-	-	-	-	7.63	7.34	7.54	1.25	1.45	1.56	4.22	4.2	3.76	1.45	1.59	1.74
TR13460_c0_g1	-	Homeobox-leucine zipper protein ATHB-15 OS=Arabidopsis thaliana OX=3702 GN=ATHB-15 PE=1 SV=1	-	-	-	-	-	-	0.2	0.2	0.3	1.82	2.33	2.44	0.23	0.31	0.12	0.65	0.31	0.29
TR134628_c2_g1	-	-	-	-	-	-	-	-	0.03	0	0	0.03	0.04	0.04	0.26	0.95	0.76	0.45	0.59	0.5
TR13469_c0_g1	hypothetical protein DBR06_SOUSAS13010005, partial [Sousa chinensis]	Microtubule-associated protein RP/EB family member 1B OS=Arabidopsis thaliana OX=3702 GN=EB1B PE=1 SV=1	EB1-like C-terminal motif;Calponin homology (CH) domain	-	protein binding;molecular_function;binding;cytoskeletal protein binding;tubulin binding;microtubule binding	intracellular;cellular_component;cell;cytoskeleton;microtubule;microtubule cytoskeleton;organelle;non-membrane-bounded organelle;intracellular organelle;intracellular non-membrane-bounded organelle;organelle part;intracellular part;cytoskeletal part;intracellular organelle part;cell part;supramolecular complex;supramolecular polymer;supramolecular fiber;polymeric cytoskeletal fiber;microtubule en…	-	-	1.08	0.29	0.38	0	0.09	0.09	0.09	0.15	0.12	0.08	0.03	0.06
TR13472_c0_g1	mortality factor 4-like protein 2 [Mus musculus]|NP_001161697.1 mortality factor 4-like protein 2 [Mus musculus]|NP_001161698.1 mortality factor 4-like protein 2 [Mus musculus]|NP_001161699.1 mortality factor 4-like protein 2 [Mus musculus]|NP_001161700.1 mortality factor 4-like protein 2 [Mus musculus]|NP_001161701.1 mortality factor 4-like protein 2 [Mus musculus]|NP_001161702.1 mortality facto…	Protein MRG1 OS=Arabidopsis thaliana OX=3702 GN=MRG1 PE=1 SV=1	MRG	metabolic process;nucleobase-containing compound metabolic process;DNA metabolic process;cellular aromatic compound metabolic process;nitrogen compound metabolic process;response to stress;cellular response to DNA damage stimulus;biological_process;cellular process;cellular response to stress;cellular nitrogen compound metabolic process;macromolecule metabolic process;cellular metabolic process;p…	-	histone acetyltransferase complex;intracellular;cellular_component;membrane;cell;nucleus;nucleoplasm;intracellular membrane-bounded organelle;protein acetyltransferase complex;membrane-enclosed lumen;nuclear lumen;protein-containing complex;H4/H2A histone acetyltransferase complex;organelle;membrane-bounded organelle;non-membrane-bounded organelle;intracellular organelle;intracellular non-membran…	-	-	1.85	0.22	0.8	0.07	0.09	0.28	0.32	0.24	0.1	0.12	0.02	0.16
TR13473_c0_g1	-	-	-	-	-	-	-	-	2.52	1.52	1.2	4.49	6.63	3.59	0.81	1.36	0.8	3.95	5.69	2.22
TR13475_c0_g1	reverse transcriptase, partial [Mus musculus]	-	Reverse transcriptase (RNA-dependent DNA polymerase);Endonuclease/Exonuclease/phosphatase family;Protein of unknown function (DUF1725);Endonuclease-reverse transcriptase;Protein of unknown function (DUF3704)	-	-	-	-	-	5.93	1.82	2.42	0.4	0.77	0.63	2.73	0.82	0.48	0.33	0.25	0.13
TR1348_c0_g1	Major intrinsic protein [Macleaya cordata]	Probable aquaporin PIP2-5 OS=Arabidopsis thaliana OX=3702 GN=PIP2-5 PE=1 SV=1	Major intrinsic protein	-	-	-	-	-	29.56	28.63	29.38	27.53	24.84	26.19	12.21	12.96	12.16	25.46	27.09	28.43
TR1348_c1_g2	putative ribonuclease H protein [Vitis vinifera]	Putative glucose-6-phosphate 1-epimerase OS=Cenchrus ciliaris OX=35872 PE=2 SV=1	zinc-binding in reverse transcriptase	-	-	-	-	-	2.31	2.43	1.83	2.27	2.25	2.47	1.28	2.03	2.18	0.42	0.44	0.5
TR13481_c0_g1	PREDICTED: LOW QUALITY PROTEIN: uncharacterized protein LOC103585542 [Galeopterus variegatus]	-	-	-	-	-	-	-	1.91	0.27	0.5	0.12	0.09	0.06	0.33	0.25	0.36	0.04	0.04	0.1
TR13481_c1_g1	mCG1044012, partial [Mus musculus]	-	-	-	-	-	-	-	4.85	0.73	0.72	0.2	0.04	0.08	0.4	0.19	0.25	0	0.02	0
TR13481_c1_g2	PREDICTED: LOW QUALITY PROTEIN: uncharacterized protein LOC102555474 [Rattus norvegicus]	-	-	-	-	-	-	-	4.19	0.63	0.33	0.1	0.1	0.07	0.29	0.23	0.04	0	0.09	0.04
TR13482_c0_g1	PREDICTED: cyclin-J18-like isoform X1 [Nelumbo nucifera]	Cyclin-J18 OS=Arabidopsis thaliana OX=3702 GN=CYCJ18 PE=2 SV=2	Cyclin, N-terminal domain	-	-	-	-	-	1.52	1.17	1.42	0.19	0.29	0.4	0.4	0.28	0.28	0.82	0.8	0.54
TR134852_c0_g1	hypothetical protein BSF34_22450 [Escherichia coli]|ONG34793.1 hypothetical protein BXT93_11560 [Escherichia coli]|ORC94774.1 hypothetical protein A4T35_22450 [Escherichia coli]|ORC94807.1 hypothetical protein A4T35_22665 [Escherichia coli]|ORD01827.1 hypothetical protein A4T35_14495 [Escherichia coli]|ORD04778.1 hypothetical protein A4T55_12995 [Escherichia coli]|ORD05959.1 hypothetical protein …	-	-	-	-	-	-	-	20.7	20.16	18.44	5.59	3.44	3	18.11	15.61	10.91	2.48	4.88	2.38
TR13494_c0_g1	Cytokinin riboside 5&apos	Cytokinin riboside 5&apos	Possible lysine decarboxylase	-	-	-	K06966|ppnN; pyrimidine/purine-5'-nucleotide nucleosidase [EC:3.2.2.10 3.2.2.-]	ko00230(Metabolism);ko00240(Metabolism);ko01100(Metabolism)	0.31	0.18	0.14	0.2	0	0	0.5	1.17	1.54	0.35	0.17	0.09
TR13501_c0_g1	-	-	-	-	-	-	-	-	0.03	0.06	0.03	0.02	0.03	0.09	4.15	3.85	4.3	0.43	0.23	0.16
TR13506_c0_g1	-	26S proteasome regulatory subunit 6B homolog OS=Helianthus annuus OX=4232 PE=1 SV=1	-	-	-	-	-	-	0.8	1.03	0.87	0.94	0.83	0.69	0.25	0.17	0.1	0.12	0.08	0.24
TR13506_c1_g1	PREDICTED: UBP1-associated protein 2A-like [Nelumbo nucifera]|XP_010251673.1 PREDICTED: UBP1-associated protein 2A-like [Nelumbo nucifera]|XP_010251674.1 PREDICTED: UBP1-associated protein 2A-like [Nelumbo nucifera]	UBP1-associated protein 2A OS=Arabidopsis thaliana OX=3702 GN=UBA2A PE=1 SV=1	RNA recognition motif. (a.k.a. RRM, RBD, or RNP domain);RNA recognition motif	-	-	-	K12741|HNRNPA1_3; heterogeneous nuclear ribonucleoprotein A1/A3	ko03040(Genetic Information Processing)	2.18	2.34	2.52	0.92	1.1	0.7	2.43	2.5	2.22	2.82	3.28	2.88
TR1351_c0_g1	Protein of unknown function DUF761 [Macleaya cordata]	-	Cotton fibre expressed protein;Domain of unknown function (DUF4408)	-	-	-	-	-	50.78	56.81	52.7	103.19	99.24	98.84	132.11	143.34	144.28	45.53	45.62	43.4
TR1351_c1_g1	hypothetical protein CFOL_v3_03855 [Cephalotus follicularis]	-	-	-	-	-	-	-	1045.23	997.24	955.37	1286.12	1281.07	1192.66	1029.04	1088.16	1091.89	2960.6	3492.19	2869.31
TR1351_c3_g1	-	-	-	-	-	-	-	-	1.26	1.14	1.64	5.44	5.53	2.66	1.34	1.01	0.45	0	1.48	0
TR1351_c5_g1	-	-	-	-	-	-	-	-	3.05	0.72	0.45	0.05	0	0.25	0.19	0.22	0.2	0.08	0.04	0.08
TR13513_c0_g1	-	-	-	-	-	-	-	-	2.35	2.46	3.22	0.16	0.43	0.48	1.26	2.43	1.29	0.42	1.01	1.13
TR13513_c0_g2	-	-	-	-	-	-	-	-	0	0.79	0.56	4.52	5.51	5.9	0.85	0	1.39	0	0.81	0
TR13515_c0_g1	hypothetical protein AQUCO_03400102v1 [Aquilegia coerulea]	Purple acid phosphatase 3 OS=Arabidopsis thaliana OX=3702 GN=PAP3 PE=2 SV=1	Calcineurin-like phosphoesterase	-	-	-	-	-	50.39	48.44	54.85	21.62	32.06	27.57	38.17	41.3	40.77	75.61	64.95	74.5
TR13515_c0_g2	purple acid phosphatase 4-like [Rosa chinensis]|PRQ40982.1 putative Acid phosphatase [Rosa chinensis]	Purple acid phosphatase 3 OS=Arabidopsis thaliana OX=3702 GN=PAP3 PE=2 SV=1	-	-	-	-	-	-	203.38	204.8	201.59	95.16	101.88	96.1	172.39	183.93	162.53	284.67	293.63	297.2
TR1352_c0_g1	PREDICTED: amino acid permease 4-like [Nelumbo nucifera]	Amino acid permease 1 OS=Arabidopsis thaliana OX=3702 GN=AAP1 PE=1 SV=1	Transmembrane amino acid transporter protein	-	-	-	-	-	7.53	7.91	7.1	5.27	4.88	5.28	2.57	3.33	3.17	1.36	0.69	1.25
TR1352_c1_g2	PREDICTED: uncharacterized protein LOC104585789 isoform X2 [Nelumbo nucifera]	Casein kinase II subunit alpha-2 OS=Oryza sativa subsp. japonica OX=39947 GN=HD6 PE=3 SV=1	-	-	-	-	-	-	2.6	3.54	4.15	2.5	3.25	2.49	1.63	0.97	1.16	0.75	0.72	1.33
TR13520_c0_g1	hypothetical protein AQUCO_09500015v1 [Aquilegia coerulea]|PIA26250.1 hypothetical protein AQUCO_09500015v1 [Aquilegia coerulea]	Protein PIN-LIKES 3 OS=Arabidopsis thaliana OX=3702 GN=PILS3 PE=2 SV=1	Membrane transport protein	-	-	-	-	-	1.69	1.61	1.5	0.32	0.5	0.24	0.52	0.72	0.69	0.38	0.37	0.56
TR1353_c1_g1	putative xyloglucan endotransglucosylase/hydrolase protein 23 [Vitis vinifera]	Xyloglucan endotransglucosylase/hydrolase protein 22 OS=Arabidopsis thaliana OX=3702 GN=XTH22 PE=1 SV=1	Glycosyl hydrolases family 16;Xyloglucan endo-transglycosylase (XET) C-terminus	-	-	-	-	-	23.56	22.88	26.89	23.46	24.6	24.39	11.52	12.26	11.29	3.65	2.9	3.18
TR1353_c1_g3	Glycoside hydrolase [Macleaya cordata]	Xyloglucan endotransglucosylase/hydrolase 2 OS=Glycine max OX=3847 PE=2 SV=1	-	-	-	-	K14504|TCH4; xyloglucan:xyloglucosyl transferase TCH4 [EC:2.4.1.207]	ko04075(Environmental Information Processing)	15.75	17.85	15.46	17.93	14.32	11.78	7.82	7.23	8.05	1.67	2.27	2.09
TR1353_c6_g1	PREDICTED: xyloglucan endotransglucosylase/hydrolase 2-like [Nelumbo nucifera]	Xyloglucan endotransglucosylase/hydrolase 2 OS=Glycine max OX=3847 PE=2 SV=1	Glycosyl hydrolases family 16;Xyloglucan endo-transglycosylase (XET) C-terminus	-	-	-	-	-	80.34	90.14	83.69	203.8	204.33	206.78	28.23	29.12	29.77	7.57	7.32	7.91
TR13531_c0_g1	-	-	-	-	-	-	-	-	0.08	0.16	0.18	0.06	0	0	0.81	0.96	0.93	0	0	0
TR13535_c0_g1	zinc finger protein [Macleaya cordata]	Putative E3 ubiquitin-protein ligase XBAT31 OS=Arabidopsis thaliana OX=3702 GN=XBAT31 PE=2 SV=1	Ankyrin repeats (3 copies);Ankyrin repeats (many copies);Ankyrin repeats (many copies);Ankyrin repeat;Ankyrin repeat	-	-	-	-	-	2.68	2.44	2.69	6.52	5.44	5.19	5.21	4.97	6.66	3.89	4.28	4.37
TR13546_c0_g1	Protein of unknown function UPF0301 [Macleaya cordata]	-	-	-	-	-	-	-	15.02	16.74	15.95	34.44	36.48	30.37	15.02	13.65	16.03	18.23	19.01	17.69
TR13550_c0_g1	Mlo-related protein [Macleaya cordata]	MLO-like protein 10 OS=Arabidopsis thaliana OX=3702 GN=MLO10 PE=2 SV=1	Mlo family	-	-	-	-	-	0.8	0.94	1.06	0.17	0.39	0.64	1.47	1.19	1.23	1.78	2.31	2.42
TR135528_c0_g1	glutamate receptor 2 isoform 1 precursor [Rattus norvegicus]|CAA38465.1 glutamate receptor [Rattus norvegicus]|AAC37652.1 glutamate receptor [Rattus norvegicus]|AAD51284.1 glutamate receptor subunit GluR2-flip [Rattus norvegicus]	Glutamate receptor 3.5 OS=Arabidopsis thaliana OX=3702 GN=GLR3.5 PE=2 SV=2	Receptor family ligand binding region;Ligated ion channel L-glutamate- and glycine-binding site;Ligand-gated ion channel;Bacterial extracellular solute-binding proteins, family 3	metabolic process;receptor recycling;biological_process;cellular process;regulation of metabolic process;signaling;regulation of signaling;regulation of cellular metabolic process;receptor metabolic process;macromolecule metabolic process;cellular metabolic process;cellular macromolecule metabolic process;regulation of biological process;regulation of cellular process;regulation of macromolecule …	molecular_function;transmembrane signaling receptor activity;ionotropic glutamate receptor activity;signaling receptor activity;transporter activity;ion channel activity;extracellular ligand-gated ion channel activity;cation channel activity;transmembrane transporter activity;glutamate receptor activity;cation transmembrane transporter activity;ion transmembrane transporter activity;channel activ…	plasma membrane;intracellular;cellular_component;integral component of membrane;membrane;integral component of plasma membrane;cell;cytoplasm;endoplasmic reticulum;intracellular membrane-bounded organelle;transport vesicle;transport vesicle membrane;synaptic vesicle;ionotropic glutamate receptor complex;endomembrane system;vesicle membrane;neuron projection;axon;dendrite;site of polarized growth;…	-	-	0.66	0.54	0.28	0.02	0.07	0.03	0.17	0.1	0.07	0.04	0	0
TR13554_c0_g1	-	-	-	-	-	-	-	-	14.6	12.42	17.78	25.73	23.48	24.56	25.37	30.33	27.58	68.48	71.65	62.94
TR135637_c0_g1	C2 calcium-dependent membrane targeting [Macleaya cordata]	Synaptotagmin-2 OS=Arabidopsis thaliana OX=3702 GN=SYT2 PE=2 SV=1	C2 domain	-	-	-	-	-	0.45	0.4	0.58	0.47	0.26	0.54	4.11	4.96	4.29	0.67	0.61	0.64
TR13569_c0_g1	PREDICTED: G2/mitotic-specific cyclin-2-like [Nelumbo nucifera]	Cyclin-B2-2 OS=Oryza sativa subsp. indica OX=39946 GN=CYCB2-2 PE=1 SV=2	Cyclin, N-terminal domain;Cyclin, C-terminal domain	-	-	-	K05868|CCNB1; G2/mitotic-specific cyclin-B1	ko04068(Environmental Information Processing);ko04110(Cellular Processes);ko04114(Cellular Processes);ko04115(Cellular Processes);ko04218(Cellular Processes);ko04914(Organismal Systems)	1.49	1.52	1.16	0.99	1.15	0.92	2.19	2.37	1.92	1.59	1.39	1.19
TR13572_c0_g1	-	-	-	-	-	-	-	-	2.32	1.35	1.57	2.67	2.8	1.92	4.94	4.14	5.13	1.49	1.38	1.74
TR13574_c0_g1	PREDICTED: MDIS1-interacting receptor like kinase 2-like [Nelumbo nucifera]	-	Leucine rich repeat;Leucine Rich repeats (2 copies);Leucine Rich Repeat	-	-	-	-	-	3.82	2.87	3.27	1.93	2.37	2.49	6.16	6.12	5.89	1.57	2.91	1.7
TR135775_c0_g1	hypothetical protein Celaphus_00018899, partial [Cervus elaphus hippelaphus]	-	-	-	-	-	-	-	1.07	0.26	0.26	0.03	0	0.04	0.19	0.02	0.04	0	0	0.09
TR13578_c0_g1	Hypothetical Protein APO_2581 [Acetobacter pomorum DM001]	-	-	-	-	-	-	-	9.22	4.99	17.15	2.98	4.47	1.03	7.88	0.62	4.86	6.02	5.14	3.6
TR135827_c0_g1	coagulation factor XII precursor [Rattus norvegicus]|AAH88187.1 Coagulation factor XII (Hageman factor) [Rattus norvegicus]	-	Trypsin;Kringle domain;Fibronectin type II domain;EGF-like domain;Fibronectin type I domain;Trypsin-like peptidase domain	metabolic process;kinin cascade;plasma kallikrein-kinin cascade;acute inflammatory response;activation of plasma proteins involved in acute inflammatory response;regulation of acute inflammatory response;positive regulation of acute inflammatory response;defense response;proteolysis;protein processing;nitrogen compound metabolic process;response to stress;inflammatory response;biological_process;…	molecular_function;binding;metal ion binding;ion binding;cation binding;catalytic activity;endopeptidase activity;serine-type peptidase activity;peptidase activity;peptidase activity, acting on L-amino acid peptides;hydrolase activity;serine hydrolase activity;catalytic activity, acting on a protein;aminopeptidase activity;exopeptidase activity;serine-type exopeptidase activity;calcium ion bindin…	cellular_component;extracellular region;extracellular space;vesicle;organelle;membrane-bounded organelle;extracellular organelle;extracellular region part;extracellular vesicle;extracellular exosome	-	-	1.35	0.55	0.29	0.11	0.06	0	0.35	0.23	0.2	0.08	0.07	0
TR13586_c0_g1	Caleosin [Macleaya cordata]	Probable inactive peroxygenase-like protein OS=Arabidopsis thaliana OX=3702 GN=At1g23250 PE=3 SV=1	-	-	-	-	-	-	2.87	3.26	2.14	4.03	3.48	3.16	4.82	4.75	5.21	13.26	13.62	13.46
TR1359_c1_g1	Non-heme dioxygenase N-terminal domain [Macleaya cordata]	-	non-haem dioxygenase in morphine synthesis N-terminal	-	-	-	-	-	0.33	0.18	0.3	1.1	1.11	1.25	0.89	1.33	1.36	1.35	1.18	1.47
TR13599_c0_g1	PREDICTED: em protein H5 [Nicotiana sylvestris]|XP_016434829.1 PREDICTED: em protein H5 [Nicotiana tabacum]	Em-like protein GEA6 OS=Arabidopsis thaliana OX=3702 GN=EM6 PE=2 SV=1	Small hydrophilic plant seed protein	-	-	-	-	-	0.26	0.35	0.3	0.35	0.29	0.4	1.81	1.7	3.31	0.37	0.65	0.37
TR13599_c0_g2	retrotransposon-related protein [Trifolium pratense]	Retrovirus-related Pol polyprotein from transposon TNT 1-94 OS=Nicotiana tabacum OX=4097 PE=2 SV=1	Reverse transcriptase (RNA-dependent DNA polymerase);gag-polypeptide of LTR copia-type;Integrase core domain;GAG-pre-integrase domain	-	-	-	-	-	0.03	0.03	0.04	0.07	0.04	0.08	0.07	0.17	0.08	0.96	1	0.89
TR136004_c0_g1	Homeobox domain [Macleaya cordata]	Homeobox-leucine zipper protein ATHB-17 OS=Arabidopsis thaliana OX=3702 GN=ATHB-17 PE=2 SV=1	Homeobox domain;Homeobox associated leucine zipper	-	-	-	-	-	0.05	0.16	0.12	0	0	0	1.09	1.32	0.63	0	0.07	0
TR13604_c0_g1	mCG4375, isoform CRA_a, partial [Mus musculus]	-	PDZ domain (Also known as DHR or GLGF);PDZ domain	metabolic process;regulation of receptor internalization;vesicle-mediated transport;transport;endocytosis;receptor-mediated endocytosis;biological_process;negative regulation of metabolic process;cellular process;negative regulation of macromolecule metabolic process;cellular component organization;regulation of metabolic process;regulation of endocytosis;regulation of cellular metabolic process;…	protein binding;molecular_function;binding;signaling receptor binding;G protein-coupled receptor binding;cytokine receptor binding;growth factor receptor binding;phospholipid binding;lipid binding;phosphatidylinositol binding;ion binding;anion binding;phosphatidylinositol phosphate binding;phosphatidylinositol bisphosphate binding;protein dimerization activity;identical protein binding;proteoglyc…	plasma membrane;intracellular;cellular_component;integral component of membrane;membrane;extracellular region;integral component of plasma membrane;extracellular space;cell;cytoplasm;intracellular membrane-bounded organelle;cell-cell junction;adherens junction;endomembrane system;cell junction;intrinsic component of membrane;intrinsic component of plasma membrane;vesicle;protein-containing comple…	-	-	2.37	0.43	0.53	0.14	0.2	0.03	0.2	0.39	0.18	0.07	0.12	0.07
TR13607_c0_g1	-	-	-	-	-	-	-	-	0.06	0.11	0.23	1.15	1.24	1.39	0.82	1.07	1.02	1.97	1.22	1.17
TR13613_c0_g1	uncharacterized protein ycf23-like [Prunus avium]	-	Protein of unknown function (DUF561);Protein of unknown function (DUF561)	-	-	-	-	-	6.36	5.82	6.13	2.16	2.81	2.59	1.02	0.9	0.98	0.36	0.34	0.4
TR136147_c0_g1	hypothetical protein [Hydrogenophaga sp. PBC]|AOS80267.1 hypothetical protein Q5W_15460 [Hydrogenophaga sp. PBC]	-	-	-	-	-	-	-	0.69	0.52	0.37	0.11	0.15	0.12	0.59	0.18	0.16	0.09	0.03	0.13
TR13615_c0_g1	unnamed protein product, partial [Gulo gulo]	-	Ankyrin repeats (3 copies);Ankyrin repeats (many copies);Ankyrin repeats (many copies);Ankyrin repeat;Ankyrin repeat	-	-	-	-	-	1.76	0.51	0.59	0.14	0.05	0.1	0.28	0.09	0.08	0.06	0.03	0.13
TR13616_c0_g1	-	-	-	-	-	-	-	-	0	0	0	0.65	1.52	2.76	2.32	2.92	0.92	0.86	1.07	1.14
TR136195_c0_g1	PREDICTED: protein FAM46C isoform X1 [Cercocebus atys]	-	Nucleotidyltransferase	-	-	-	-	-	1.56	0.36	0.33	0.12	0.16	0.03	0.11	0.13	0.06	0	0.02	0
TR13626_c0_g1	-	-	-	-	-	-	-	-	0.97	0.59	0.46	0.88	0.33	0.45	3.19	5.12	3.61	2.52	3.34	1.69
TR1363_c0_g1	Ceramidase [Macleaya cordata]	Alkaline ceramidase OS=Arabidopsis thaliana OX=3702 GN=ACER PE=2 SV=1	Ceramidase	-	-	-	K04711|ACER3, YDC1; dihydroceramidase [EC:3.5.1.-]	ko00600(Metabolism);ko01100(Metabolism)	6.98	7.17	6.3	4.31	4.12	3.46	4.38	4.94	4.59	9.67	9.32	9.52
TR13630_c0_g1	hypothetical protein HMPREF9565_01483 [Cutibacterium acnes HL053PA2]	-	-	-	-	-	-	-	37.25	42.15	19.61	10.68	11.31	16.38	38.53	10.17	19.25	7.27	5.21	4.17
TR13634_c0_g1	-	-	-	-	-	-	-	-	6.79	4	5.24	0.91	1.55	0.48	2	1.34	1.65	0.8	0.66	1.4
TR1364_c1_g1	-	-	-	-	-	-	-	-	9.72	10.73	15.42	2.82	2.01	1.65	6.45	3.34	7.33	5.27	6.85	3.21
TR13652_c0_g1	Rubber elongation factor [Macleaya cordata]	Stress-related protein OS=Vitis riparia OX=96939 GN=SRP PE=2 SV=1	-	-	-	-	-	-	0.22	0.14	0.58	4.17	3.2	3.72	0.32	0.39	0.59	1.79	2.58	2.39
TR13655_c0_g1	Diacylglycerol kinase [Macleaya cordata]	Sphingoid long-chain bases kinase 1 OS=Arabidopsis thaliana OX=3702 GN=LCBK1 PE=1 SV=1	-	-	-	-	-	-	6.42	11.66	15.81	1.74	0	1.71	2.58	1.66	1.57	20.95	12.51	20.32
TR13658_c0_g2	-	-	-	-	-	-	-	-	0.04	0.12	0.05	1.17	1.17	1.06	0.9	1.19	0.84	0.17	0.29	0.11
TR13667_c0_g1	putative gag-pro-pol polyprotein [Murine leukemia virus CasE								2.68	0.32	0.66	0.2	0.2	0.04	0.7	0.2	0.17	0.1	0.07	0
TR13669_c0_g1	PREDICTED: patatin-like protein 7 [Nelumbo nucifera]	Patatin-like protein 7 OS=Arabidopsis thaliana OX=3702 GN=PLP7 PE=2 SV=1	Patatin-like phospholipase	-	-	-	-	-	3.52	3.98	5	1.41	1.06	1.01	0.47	0.44	0.57	0.45	0.6	0.54
TR1367_c0_g1	-	-	-	-	-	-	-	-	135.32	135.6	129.59	115.83	125.29	105.78	595.05	644.39	596.1	243.19	267.46	281.57
TR1367_c0_g2	-	-	-	-	-	-	-	-	109.14	110.48	99.68	204.12	210.93	209.42	147.19	156.2	144.01	43.66	45.32	47.26
TR1367_c1_g1	adhesive plaque matrix-like protein isoform X1 [Cinnamomum micranthum f. kanehirae]	-	Pollen proteins Ole e I like	-	-	-	-	-	43.8	42.56	40.68	100.14	93.89	86.76	92.42	111.77	82.82	27.74	28.7	29
TR1367_c2_g1	-	-	-	-	-	-	-	-	125.47	132.46	113.78	113.44	116.61	109.9	29.21	27.36	31.43	30.7	31.52	29.19
TR13672_c0_g2	plasma protease C1 inhibitor precursor [Rattus norvegicus]|XP_006234509.1 PREDICTED: plasma protease C1 inhibitor isoform X1 [Rattus norvegicus]|Q6P734.1 RecName: Full=Plasma protease C1 inhibitor	-	Serpin (serine protease inhibitor)	metabolic process;complement activation, lectin pathway;regulation of complement activation, lectin pathway;immune effector process;activation of immune response;immune system process;acute inflammatory response;regulation of acute inflammatory response;regulation of immune system process;negative regulation of immune system process;positive regulation of immune system process;regulation of immun…	protein binding;molecular_function;binding;enzyme inhibitor activity;endopeptidase inhibitor activity;endopeptidase regulator activity;molecular function regulator;peptidase inhibitor activity;enzyme regulator activity;peptidase regulator activity;serine-type endopeptidase inhibitor activity;complement binding	cellular_component;extracellular region;extracellular space;vesicle;organelle;membrane-bounded organelle;extracellular organelle;extracellular region part;extracellular vesicle;blood microparticle;extracellular exosome	-	-	1.47	0.34	0.69	0.14	0.03	0.03	0.13	0.31	0.2	0.12	0.06	0.12
TR13678_c0_g1	hypothetical protein AQUCO_01200117v1 [Aquilegia coerulea]	Beta-glucosidase 47 OS=Arabidopsis thaliana OX=3702 GN=BGLU47 PE=3 SV=2	Glycosyl hydrolase family 1	-	-	-	-	-	127.76	128.98	126.74	205.66	218.86	208.24	315.4	314.45	318.25	737.21	734.31	769.28
TR13682_c0_g1	CCNI protein variant, partial [Homo sapiens]	Cyclin-B2-2 OS=Oryza sativa subsp. indica OX=39946 GN=CYCB2-2 PE=1 SV=2	Cyclin, N-terminal domain	-	-	-	-	-	2.89	0.58	0.72	0.2	0.2	0.3	0.56	0.42	0.29	0.13	0.18	0.19
TR13687_c0_g1	purple acid phosphatase 17-like [Camellia sinensis]	Purple acid phosphatase 17 OS=Arabidopsis thaliana OX=3702 GN=PAP17 PE=2 SV=1	-	-	-	-	-	-	33.73	7	19.03	9.45	35.74	17.87	141.35	81.47	62.24	0	6.37	0
TR13688_c0_g1	-	-	-	-	-	-	-	-	0.09	0.03	0.1	0.27	0.1	0.21	1.3	1.21	1.36	0.13	0.35	0.34
TR1369_c1_g1	hypothetical protein AQUCO_00100464v1 [Aquilegia coerulea]	Probable chlorophyll(ide) b reductase NYC1, chloroplastic OS=Oryza sativa subsp. japonica OX=39947 GN=NYC1 PE=1 SV=1	short chain dehydrogenase;Enoyl-(Acyl carrier protein) reductase;KR domain	-	-	-	-	-	20.31	21.2	20.66	58.48	56.35	57.21	86.32	82.63	85.42	107.97	102.94	106.22
TR1369_c1_g2	probable chlorophyll(ide) b reductase NYC1, chloroplastic [Sesamum indicum]	Probable chlorophyll(ide) b reductase NYC1, chloroplastic OS=Oryza sativa subsp. japonica OX=39947 GN=NYC1 PE=1 SV=1	-	-	-	-	-	-	12.24	14.8	13.47	37.84	32.3	31.44	47.02	56.77	53.58	56.47	58.9	57.26
TR1369_c3_g1	Peptidase S10 [Macleaya cordata]	Serine carboxypeptidase-like 40 OS=Arabidopsis thaliana OX=3702 GN=SCPL40 PE=2 SV=2	Serine carboxypeptidase	-	-	-	-	-	13.01	12.84	13.71	11.89	11.46	11.66	34.26	35.77	32.9	14.11	12.02	11.87
TR1369_c5_g1	-	-	-	-	-	-	-	-	20.15	26.27	27.95	21.92	26.28	18.25	3.08	7.55	7.98	11.91	9.48	8.92
TR1370_c0_g1	hypothetical protein AQUCO_02200030v1 [Aquilegia coerulea]	Nudix hydrolase 13, mitochondrial OS=Arabidopsis thaliana OX=3702 GN=NUDT13 PE=1 SV=1	NUDIX domain	-	-	-	-	-	23.15	25.48	23.55	24.69	24.88	25.6	24.99	25.74	26.34	7.95	8.29	9.14
TR13700_c0_g1	PREDICTED: photosynthetic NDH subunit of subcomplex B 1, chloroplastic [Nelumbo nucifera]	Photosynthetic NDH subunit of subcomplex B 1, chloroplastic OS=Arabidopsis thaliana OX=3702 GN=PNSB1 PE=2 SV=1	-	-	-	-	-	-	1.78	1.75	1.79	1.44	1.65	1.98	0.6	0.62	0.59	0.74	0.36	0.47
TR13701_c0_g1	Pirin [Macleaya cordata]	Pirin-like protein OS=Solanum lycopersicum OX=4081 PE=2 SV=1	Pirin;Pirin C-terminal cupin domain	-	-	-	-	-	18.89	20.34	22.54	1.87	2.25	1.89	2.19	2.32	1.94	14.45	13.53	15.06
TR13707_c0_g1	PREDICTED: uncharacterized protein LOC108999762 [Juglans regia]	-	-	-	-	-	-	-	5.01	5.65	3.44	3.75	4.65	4.91	2.04	0.8	0.65	1.1	0.6	0.95
TR1372_c0_g2	hypothetical protein AQUCO_00900755v1 [Aquilegia coerulea]|PIA54417.1 hypothetical protein AQUCO_00900755v1 [Aquilegia coerulea]	Alpha-glucan phosphorylase, H isozyme OS=Vicia faba OX=3906 PE=2 SV=1	Carbohydrate phosphorylase;SacI homology domain	-	-	-	-	-	35.25	36.05	34.44	31.19	31.33	31.81	40.57	40.18	38.37	98.37	96.27	99.81
TR13733_c2_g2	-	-	-	-	-	-	-	-	0.88	0	0.79	20.06	17.74	19.47	0.8	0.39	1.06	5.88	4.48	3.25
TR13736_c0_g1	-	Fructokinase-2 OS=Oryza sativa subsp. japonica OX=39947 GN=FRK2 PE=1 SV=1	-	-	-	-	-	-	1	1.43	1.62	0.27	0.23	0.55	0.76	0.96	0.54	0.56	0.56	0.56
TR13739_c0_g1	46 kDa FK506-binding nuclear protein-like [Octodon degus]	Peptidyl-prolyl cis-trans isomerase FKBP62 OS=Arabidopsis thaliana OX=3702 GN=FKBP62 PE=1 SV=2	FKBP-type peptidyl-prolyl cis-trans isomerase	metabolic process;cellular protein modification process;nitrogen compound metabolic process;biological_process;cellular process;peptidyl-amino acid modification;peptidyl-proline modification;protein metabolic process;protein modification process;macromolecule metabolic process;macromolecule modification;cellular metabolic process;primary metabolic process;cellular macromolecule metabolic process;…	molecular_function;catalytic activity;isomerase activity;cis-trans isomerase activity;catalytic activity, acting on a protein;binding;macrolide binding;drug binding;organic cyclic compound binding;heterocyclic compound binding;protein binding;heat shock protein binding;signaling receptor binding;cytokine receptor binding;transforming growth factor beta receptor binding;protein dimerization activi…	intracellular;cellular_component;contractile fiber;membrane;extracellular region;extracellular space;cell;cytoplasm;endoplasmic reticulum;endoplasmic reticulum membrane;intracellular membrane-bounded organelle;endomembrane system;sarcoplasm;sarcoplasmic reticulum;neuron projection;myofibril;sarcomere;axon;organelle membrane;I band;vesicle;organelle subcompartment;axon part;nuclear outer membrane-…	-	-	3.34	0.54	0.51	0.33	0.26	0.23	0.66	0.37	0.36	0.33	0.09	0
TR13746_c0_g1	-	-	-	-	-	-	-	-	0	0.25	0	0.31	0.14	0	0.15	1.05	0.61	6.8	6.36	5.9
TR137478_c0_g1	fermitin family homolog 3 isoform X1 [Papio anubis]|XP_005577511.1 PREDICTED: fermitin family homolog 3 [Macaca fascicularis]|XP_009184016.1 fermitin family homolog 3 isoform X1 [Papio anubis]|XP_011897299.1 PREDICTED: fermitin family homolog 3 [Cercocebus atys]|XP_011897300.1 PREDICTED: fermitin family homolog 3 [Cercocebus atys]|XP_011718896.1 fermitin family homolog 3 [Macaca nemestrina]|XP_01…	-	FERM central domain;PH domain	-	-	-	-	-	0.86	0.19	0.32	0	0.08	0.05	0.21	0.06	0	0	0	0
TR13753_c0_g1	unnamed protein product [Macaca fascicularis]	-	-	-	-	-	-	-	4.2	1.14	0.89	0.16	0.51	0.33	0.86	0.69	0.52	0.2	0.13	0.48
TR1376_c0_g1	hypothetical chloroplast RF1 (chloroplast) [Akebia trifoliata]|AMD08162.1 hypothetical chloroplast RF1 (chloroplast) [Akebia trifoliata]	Protein TIC 214 OS=Buxus microphylla OX=153571 GN=TIC214 PE=3 SV=1	Ycf1;Respiratory-chain NADH dehydrogenase, 49 Kd subunit;NADH dehydrogenase;4Fe-4S binding domain;4Fe-4S dicluster domain;4Fe-4S dicluster domain;4Fe-4S dicluster domain;4Fe-4S binding domain;4Fe-4S dicluster domain;4Fe-4S double cluster binding domain;4Fe-4S dicluster domain;NADH-ubiquinone/plastoquinone oxidoreductase chain 6;NADH-ubiquinone/plastoquinone oxidoreductase chain 4L	-	-	intracellular;cellular_component;membrane;cell;cytoplasm;intracellular membrane-bounded organelle;plastid;intrinsic component of membrane;organelle;membrane-bounded organelle;intracellular organelle;intracellular part;membrane part;cytoplasmic part;cell part;integral component of membrane;chloroplast	-	-	8.4	8.86	8.66	7.77	6.7	7.45	4.07	3.99	4.84	2.12	1.68	1.65
TR1376_c0_g2	Protein of unknown function UPF0301 [Macleaya cordata]	-	Uncharacterized ACR, COG1678	-	-	-	-	-	3.64	2.49	3.86	11.01	12.37	9.26	6.13	7.01	5.77	8.25	8.5	8.56
TR1376_c0_g5	Protein of unknown function UPF0301 [Macleaya cordata]	-	Uncharacterized ACR, COG1678	-	-	-	-	-	8.78	9.3	9.82	11.27	11.05	12.25	5.15	5.09	5.38	4.66	4.72	4.48
TR13760_c0_g1	PREDICTED: F-box/kelch-repeat protein At5g26960 [Nelumbo nucifera]	F-box/kelch-repeat protein At5g26960 OS=Arabidopsis thaliana OX=3702 GN=At5g26960 PE=2 SV=1	Kelch motif;Kelch motif;F-box domain;Kelch motif;F-box-like;Galactose oxidase, central domain	-	-	-	-	-	2.17	2.49	2.12	2.81	2.24	2.35	1.81	1.61	1.96	7.03	8.68	8.88
TR137708_c0_g1	unnamed protein product, partial [Mus musculus]	-	Intermediate filament protein	-	-	-	-	-	2.31	1.07	0.48	0.08	0	0	0.11	0.03	0.06	0	0.03	0.07
TR13772_c0_g1	hypothetical protein C3943_01430 [Lysinibacillus sp. B2A1]	-	-	-	-	-	-	-	6.86	1.9	3.04	1.63	0.22	0.28	0.47	0.17	0.48	0.29	0.27	0.14
TR13773_c1_g1	-	-	-	-	-	-	-	-	0.38	0.28	0.32	0.75	0.57	0.62	0.83	1.01	1.03	0.05	0.09	0.2
TR13787_c0_g1	-	-	-	-	-	-	-	-	0.1	0.2	0.23	1.69	0.91	1.07	0.75	0.58	0.78	1.25	1.4	1.49
TR13795_c0_g1	PREDICTED: protein NETWORKED 1D isoform X2 [Nelumbo nucifera]	Protein NETWORKED 1B OS=Arabidopsis thaliana OX=3702 GN=NET1B PE=2 SV=1	KIP1-like protein	-	-	-	-	-	0.32	0.25	0.24	0.1	0.06	0.14	0.35	0.36	0.29	0.76	0.75	0.62
TR13799_c0_g1	tetraketide alpha-pyrone reductase 2-like [Hevea brasiliensis]	Tetraketide alpha-pyrone reductase 2 OS=Arabidopsis thaliana OX=3702 GN=TKPR2 PE=1 SV=1	NAD dependent epimerase/dehydratase family;3-beta hydroxysteroid dehydrogenase/isomerase family;NAD(P)H-binding;Male sterility protein;GDP-mannose 4,6 dehydratase;NmrA-like family	-	-	-	-	-	1.34	1.38	1	0.31	0.34	0.39	0.95	0.7	0.45	0.73	1.03	1.07
TR1380_c0_g1	Multi antimicrobial extrusion protein [Macleaya cordata]	Protein DETOXIFICATION 18 OS=Arabidopsis thaliana OX=3702 GN=DTX18 PE=2 SV=1	MatE;MatE;MatE	-	-	-	-	-	53.7	58.32	56.09	106.58	103.56	106.54	173.71	177.75	183.11	154.59	149.99	154.04
TR1380_c7_g1	hypothetical protein PRUPE_1G022400 [Prunus persica]	-	-	-	-	-	-	-	8.31	9.68	8.55	9.94	13.2	10.91	4.41	5.09	6.06	4.12	5.82	7.46
TR13801_c1_g1	-	-	-	-	-	-	-	-	24.46	19.22	40.01	5.79	4.18	5.61	6.31	0.61	5.64	9.43	6.36	14.79
TR13805_c0_g2	mCG51330, partial [Mus musculus]	-	-	-	-	-	-	-	6.63	1.79	1.73	0.13	0.36	0	0.58	0.47	0.19	0.71	0.11	0
TR13816_c2_g1	zinc finger protein [Macleaya cordata]	E3 ubiquitin-protein ligase At3g02290 OS=Arabidopsis thaliana OX=3702 GN=At3g02290 PE=2 SV=1	RING-H2 zinc finger domain;Ring finger domain;Zinc finger, C3HC4 type (RING finger);Anaphase-promoting complex subunit 11 RING-H2 finger;RING-type zinc-finger;RING-like zinc finger;Zinc finger, C3HC4 type (RING finger)	-	-	-	-	-	5.46	5	5.73	7.24	7.96	7.78	4.85	4.52	5.26	9.63	9.03	8.38
TR13817_c0_g1	PREDICTED: MDIS1-interacting receptor like kinase 2-like [Nelumbo nucifera]	-	Leucine rich repeat;Leucine Rich repeats (2 copies);Leucine rich repeat N-terminal domain;Leucine Rich Repeat	-	-	-	-	-	6.57	6.47	6.37	15.48	13.4	15.77	18.83	17.34	20.4	21.25	19.65	22.25
TR13824_c0_g1	YAP-binding/Alf4/Glomulin [Macleaya cordata]	Aberrant root formation protein 4 OS=Arabidopsis thaliana OX=3702 GN=ALF4 PE=1 SV=2	Uncharacterised protein family, YAP/Alf4/glomulin	-	-	-	-	-	2.67	2.77	2.01	2.23	2	2.16	2.33	1.76	1.5	3.88	3.57	3.94
TR13825_c0_g1	uncharacterized protein LOC106866887 isoform X1 [Brachypodium distachyon]	-	-	-	-	-	-	-	0.87	0.61	0.38	0.76	0.8	1.06	1.7	1.28	1.49	0.22	0.27	0.43
TR13826_c0_g1	cytochrome c oxidase subunit 7C, mitochondrial-like [Papio anubis]	-	-	transport;ion transport;cation transport;biological_process;monovalent inorganic cation transport;ion transmembrane transport;localization;establishment of localization;transmembrane transport;cation transmembrane transport;inorganic ion transmembrane transport;inorganic cation transmembrane transport;proton transmembrane transport	electron transfer activity;molecular_function;catalytic activity;transporter activity;transmembrane transporter activity;oxidoreductase activity;cation transmembrane transporter activity;heme-copper terminal oxidase activity;ion transmembrane transporter activity;monovalent inorganic cation transmembrane transporter activity;proton transmembrane transporter activity;inorganic molecular entity tra…	intracellular;cellular_component;membrane;mitochondrion;cell;cytoplasm;mitochondrial envelope;intracellular membrane-bounded organelle;organelle inner membrane;organelle membrane;intrinsic component of membrane;mitochondrial membrane;organelle envelope;envelope;organelle;membrane-bounded organelle;intracellular organelle;organelle part;intracellular part;membrane part;mitochondrial part;cytoplasm…	-	-	13.93	3	3.76	1.38	1.12	0.98	2.78	2.01	1.39	0.73	0.23	0.24
TR13827_c0_g1	hypothetical protein AQUCO_00700772v1 [Aquilegia coerulea]	Probable LRR receptor-like serine/threonine-protein kinase At4g37250 OS=Arabidopsis thaliana OX=3702 GN=At4g37250 PE=2 SV=1	Protein kinase domain;Protein tyrosine kinase;Leucine Rich repeats (2 copies);Leucine rich repeat;Leucine rich repeat N-terminal domain;Leucine Rich Repeat	-	-	-	-	-	0.68	0.69	0.94	0.17	0.27	0.21	2.19	1.79	2.04	0.4	0.3	0.32
TR13840_c0_g1	hypothetical protein [Chlamydia abortus]|SGW38834.1 Reverse transcriptase (RNA-dependent DNA polymerase) [Chlamydia abortus]	-	Reverse transcriptase thumb domain;Integrase core domain;Reverse transcriptase (RNA-dependent DNA polymerase);Integrase DNA binding domain;Integrase Zinc binding domain;RNase H;gag gene protein p24 (core nucleocapsid protein);GAG-polyprotein viral zinc-finger;Zinc knuckle;Retroviral aspartyl protease;G-patch domain;dUTPase	-	-	-	-	-	6.08	1.15	0.92	0.15	0.18	0.15	0.72	0.38	0.17	0.17	0.04	0.05
TR13845_c0_g1	hypothetical protein AQUCO_01300494v1 [Aquilegia coerulea]	Transcription factor bHLH36 OS=Arabidopsis thaliana OX=3702 GN=BHLH36 PE=2 SV=1	Helix-loop-helix DNA-binding domain	-	-	-	-	-	3.19	2.87	3.41	0.62	0.89	0.53	1.16	0.96	1.08	1.02	1.01	1.08
TR1385_c0_g1	PREDICTED: calmodulin-binding protein 60 D-like isoform X1 [Nelumbo nucifera]	Calmodulin-binding protein 60 B OS=Arabidopsis thaliana OX=3702 GN=CBP60B PE=2 SV=1	Calmodulin binding protein-like	-	-	-	-	-	13.8	14.81	13.03	14.64	14.43	15.57	15.13	14.97	14.97	2.09	1.68	1.96
TR138657_c0_g2	-	-	-	-	-	-	-	-	1.41	0.77	0.62	0.06	0.08	0.17	0.35	0.19	0.18	0.11	0.08	0.05
TR1387_c0_g1	PREDICTED: pyruvate kinase PKM isoform X2 [Mus musculus]	Pyruvate kinase, cytosolic isozyme OS=Glycine max OX=3847 PE=2 SV=1	Pyruvate kinase, barrel domain;Pyruvate kinase, alpha/beta domain	-	-	-	K00873|PK, pyk; pyruvate kinase [EC:2.7.1.40]	ko00010(Metabolism);ko00230(Metabolism);ko00620(Metabolism);ko01100(Metabolism);ko01110(Metabolism);ko01120(Metabolism);ko01200(Metabolism);ko01230(Metabolism);ko04922(Organismal Systems)	24.76	4.55	3.3	1.46	0.84	1.18	2.96	1.93	0.85	0.81	0.6	0.66
TR13875_c0_g1	mitogen-activated protein kinase kinase kinase 18-like [Glycine soja]|RZB89983.1 Mitogen-activated protein kinase kinase kinase 17 [Glycine soja]	Mitogen-activated protein kinase kinase kinase 18 OS=Arabidopsis thaliana OX=3702 GN=MAPKKK18 PE=1 SV=1	-	-	-	-	-	-	1.84	2.74	1.21	0.85	0	1.26	0	0	2.26	37.08	41.54	32.54
TR13880_c0_g1	-	-	-	-	-	-	-	-	0.27	1.1	1.12	0.17	0.23	0	1.11	1.57	1.15	0.78	0.89	0.88
TR13905_c0_g1	PREDICTED: glucan endo-1,3-beta-glucosidase 5-like [Nelumbo nucifera]	Glucan endo-1,3-beta-glucosidase 5 OS=Arabidopsis thaliana OX=3702 GN=At4g31140 PE=2 SV=1	Glycosyl hydrolases family 17;X8 domain	-	-	-	K19893|GN5_6; glucan endo-1,3-beta-glucosidase 5/6 [EC:3.2.1.39]	ko00500(Metabolism);ko01100(Metabolism)	0.92	0.83	0.46	0.17	0.07	0.07	0.84	0.81	0.66	0.26	0.29	0.48
TR139242_c0_g1	MFT2 [Platanus x hispanica]	Protein MOTHER of FT and TFL1 OS=Arabidopsis thaliana OX=3702 GN=MFT PE=1 SV=1	Phosphatidylethanolamine-binding protein	-	-	-	-	-	0.45	0.08	0.09	0.25	0.08	0.17	22.4	26.09	20.05	0.54	0.31	1.41
TR1393_c0_g2	Glycoside hydrolase [Macleaya cordata]	Glucan endo-1,3-beta-glucosidase 6 OS=Arabidopsis thaliana OX=3702 GN=At5g58090 PE=2 SV=2	Glycosyl hydrolases family 17;X8 domain	-	-	-	K19893|GN5_6; glucan endo-1,3-beta-glucosidase 5/6 [EC:3.2.1.39]	ko00500(Metabolism);ko01100(Metabolism)	2.14	1.95	2.55	1.23	1.2	1.17	2.75	3.11	3.27	2.02	1.77	1.53
TR13932_c0_g3	Cyanobacterial aminoacyl-tRNA synthetase [Macleaya cordata]	-	-	-	-	-	-	-	4.06	6.73	6.91	0.21	0	0.25	0.72	1.6	2.23	0	0.19	0.35
TR13932_c0_g4	Argonaute/Dicer protein [Macleaya cordata]	Protein argonaute 16 OS=Oryza sativa subsp. japonica OX=39947 GN=AGO16 PE=2 SV=2	Piwi domain	-	-	-	-	-	0	0	0.07	1.02	1	1.1	0	0.61	0.54	0	0	0
TR13933_c0_g1	-	-	-	-	-	-	-	-	82.23	86.33	78.25	100.71	71.19	96.82	33.22	29.2	40.54	14.58	8.76	16.23
TR13934_c0_g1	-	-	-	-	-	-	-	-	8.74	8.4	7.93	1.39	0.46	0.5	4.06	2.2	1.91	2.49	4.78	4.88
TR13936_c0_g1	unnamed protein product, partial [Mus musculus]	-	Arp2/3 complex, 34 kD subunit p34-Arc	-	-	-	K05758|ARPC2; actin related protein 2/3 complex, subunit 2	ko04138(Cellular Processes);ko04144(Cellular Processes);ko04530(Cellular Processes);ko04666(Organismal Systems);ko04810(Cellular Processes)	8.03	2.04	2.43	0.56	0.73	0.97	1.95	1.34	1.17	0.79	0.22	0.47
TR139395_c0_g1	hypothetical protein AQUCO_03700238v1 [Aquilegia coerulea]	Bidirectional sugar transporter SWEET4 OS=Oryza sativa subsp. indica OX=39946 GN=SWEET4 PE=2 SV=1	Sugar efflux transporter for intercellular exchange	-	-	-	-	-	0.27	0.11	0.63	0.44	0.67	0.74	15.74	17.42	17.41	0.23	0.22	0.23
TR1394_c0_g1	Reverse transcriptase zinc-binding domain [Macleaya cordata]|OVA20865.1 Reverse transcriptase zinc-binding domain [Macleaya cordata]	-	-	-	-	-	-	-	0.42	0.35	0.4	0.85	0.82	1.05	1.6	1.13	1.25	0.05	0.05	0.16
TR13949_c0_g1	hypothetical protein DVH24_000734 [Malus domestica]	Purple acid phosphatase 15 OS=Arabidopsis thaliana OX=3702 GN=PAP15 PE=1 SV=1	Calcineurin-like phosphoesterase;Iron/zinc purple acid phosphatase-like protein C;Purple acid Phosphatase, N-terminal domain	-	-	-	-	-	8.28	7.33	8.8	10.23	9.78	10.07	21.07	21.64	19.51	2.5	2.2	2.27
TR13950_c0_g2	-	-	Leucine rich repeat;Leucine Rich repeats (2 copies);Leucine Rich Repeat;Leucine Rich repeat	-	-	-	-	-	8.16	4.19	5.92	11.54	12.41	10.62	11.75	12.76	10.63	17.38	18.03	19.3
TR13951_c1_g2	-	-	-	-	-	-	-	-	4.86	3.76	6.19	0.1	0.14	0	0.44	0.28	0.45	1.81	2.14	3.44
TR13958_c0_g1	Leucine-rich repeat [Macleaya cordata]	-	-	-	-	-	-	-	3.85	3.05	3.67	3.4	2.76	2	7.22	7.19	6.72	3.83	3.12	3.78
TR1396_c4_g1	protein SUPPRESSOR OF GENE SILENCING 3 homolog [Amborella trichopoda]|ERN18678.1 hypothetical protein AMTR_s00065p00199990 [Amborella trichopoda]	Protein SUPPRESSOR OF GENE SILENCING 3 OS=Arabidopsis thaliana OX=3702 GN=SGS3 PE=1 SV=1	XS domain	-	-	-	-	-	0.11	0.69	0.09	0.07	0.1	0.26	1.39	1.01	1.28	0.22	0.05	0.22
TR1397_c0_g1	GDP-fucose protein O-fucosyltransferase [Macleaya cordata]	O-fucosyltransferase 7 OS=Arabidopsis thaliana OX=3702 GN=OFUT7 PE=2 SV=1	GDP-fucose protein O-fucosyltransferase	-	-	-	-	-	8.22	9.5	8.76	15.8	17.3	16.9	19.9	19.22	19.65	28.27	28.08	27.71
TR1397_c1_g1	Agamous-like MADS-box protein [Actinidia chinensis var. chinensis]	Agamous-like MADS-box protein AGL104 OS=Arabidopsis thaliana OX=3702 GN=AGL104 PE=1 SV=1	SRF-type transcription factor (DNA-binding and dimerisation domain)	-	-	-	K09260|MEF2A; MADS-box transcription enhancer factor 2A	ko04013(Environmental Information Processing);ko04022(Environmental Information Processing);ko04371(Environmental Information Processing);ko04928(Organismal Systems)	0.12	0	0.14	0.03	0.04	0.05	9.01	9.13	8.19	1.68	1.24	1.07
TR1397_c2_g1	AGAMOUS-like protein [Akebia trifoliata]	Floral homeotic protein AGAMOUS OS=Panax ginseng OX=4054 GN=AG2 PE=2 SV=1	K-box region;SRF-type transcription factor (DNA-binding and dimerisation domain)	-	-	-	-	-	4	4.18	4.03	1.45	1.14	0.86	2.18	2.26	2.2	6.14	6.75	6.71
TR13973_c0_g1	PREDICTED: 14-3-3 protein epsilon isoform X1 [Colobus angolensis palliatus]	14-3-3-like protein OS=Chlamydomonas reinhardtii OX=3055 PE=2 SV=1	14-3-3 protein	-	-	-	K06630|YWHAE; 14-3-3 protein epsilon	ko04011(Environmental Information Processing);ko04110(Cellular Processes);ko04114(Cellular Processes);ko04151(Environmental Information Processing);ko04390(Environmental Information Processing);ko04391(Environmental Information Processing);ko04621(Organismal Systems);ko04722(Organismal Systems)	6.71	1.02	1.63	0.7	0.54	1.04	1.92	0.9	0.64	1.07	0.33	0.46
TR1398_c2_g1	PREDICTED: F-box protein AFR-like [Nelumbo nucifera]	F-box protein AFR OS=Arabidopsis thaliana OX=3702 GN=AFR PE=1 SV=2	Kelch motif;Kelch motif;Kelch motif;Galactose oxidase, central domain;Galactose oxidase, central domain	-	-	-	-	-	60.05	59.62	62.21	65.9	66.33	66.98	21.17	20.34	18.52	11.51	11.88	10.94
TR13981_c0_g1	PREDICTED: glutathione S-transferase U17 [Vitis vinifera]|RVW82407.1 Glutathione S-transferase U17 [Vitis vinifera]	Glutathione S-transferase U17 OS=Arabidopsis thaliana OX=3702 GN=GSTU17 PE=2 SV=1	-	-	-	-	-	-	9.4	13.65	14.66	30.62	25.77	25.47	19.61	16.91	14.69	11.82	8.92	12.11
TR13986_c0_g1	PREDICTED: plant cysteine oxidase 1-like [Nelumbo nucifera]	Plant cysteine oxidase 4 OS=Arabidopsis thaliana OX=3702 GN=PCO4 PE=1 SV=2	PCO_ADO	-	-	-	K10712|ADO; cysteamine dioxygenase [EC:1.13.11.19]	ko00430(Metabolism);ko01100(Metabolism)	1.75	2.42	2.12	2.2	2.46	1.94	2.01	2.3	1.95	30.74	30.55	32.37
TR139944_c0_g1	PREDICTED: protein S100-A9 [Macaca fascicularis]|XP_011823557.1 PREDICTED: protein S100-A9 [Mandrillus leucophaeus]|XP_011925103.1 PREDICTED: protein S100-A9 [Cercocebus atys]|XP_011767763.1 protein S100-A9 [Macaca nemestrina]|XP_015008404.1 PREDICTED: protein S100-A9 [Macaca mulatta]|XP_025220532.1 protein S100-A9 [Theropithecus gelada]|EHH15256.1 hypothetical protein EGK_01322 [Macaca mulatta]	-	S-100/ICaBP type calcium binding domain	-	-	-	-	-	17.3	5.55	8.8	0.89	1.75	1.54	3.82	2.26	1.15	0	0.25	0.52
TR140_c4_g1	PREDICTED: uncharacterized protein LOC104593648 [Nelumbo nucifera]|XP_010251915.1 PREDICTED: uncharacterized protein LOC104593648 [Nelumbo nucifera]	-	-	-	-	-	-	-	2.32	2.57	2.79	2.17	2.08	2.59	3.47	3.45	3.39	9.99	8.98	9.88
TR140_c5_g1	-	-	-	-	-	-	-	-	29.62	29.87	30.37	4.33	5.45	4.93	6.04	4.96	6.26	2.41	2.72	2.6
TR140_c6_g1	AAA+ ATPase domain [Macleaya cordata]	-	NTPase;ATPase family associated with various cellular activities (AAA);AAA ATPase domain;AAA domain;AAA domain	-	-	-	-	-	16.91	18.13	17.81	31.62	31.34	32.39	39.44	38.62	40.17	119.95	119.63	116.16
TR1400_c0_g1	PREDICTED: acyl-CoA--sterol O-acyltransferase 1-like [Nelumbo nucifera]	Long-chain-alcohol O-fatty-acyltransferase OS=Simmondsia chinensis OX=3999 PE=1 SV=1	Membrane bound O-acyl transferase family	-	-	-	-	-	13.29	13.57	14.28	13.76	14.06	13.31	6.81	7.17	5.96	6.18	7.36	7.49
TR1400_c1_g1	hypothetical protein BVC80_157g8 [Macleaya cordata]	Long-chain-alcohol O-fatty-acyltransferase OS=Simmondsia chinensis OX=3999 PE=1 SV=1	Membrane bound O-acyl transferase family	-	-	-	-	-	18.34	17.82	14.78	7.15	7.21	6.61	71.69	79.9	75.47	62.7	71.73	65.5
TR14019_c1_g1	PREDICTED: MDIS1-interacting receptor like kinase 2-like [Nelumbo nucifera]	MDIS1-interacting receptor like kinase 2 OS=Arabidopsis thaliana OX=3702 GN=MIK2 PE=1 SV=3	Leucine rich repeat;Protein kinase domain;Protein tyrosine kinase;Leucine Rich repeats (2 copies);Leucine Rich Repeat;Leucine rich repeat N-terminal domain	-	-	-	-	-	0.87	0.97	0.86	0.68	0.83	0.74	2.17	2.17	2.45	1.06	1.2	1.3
TR14026_c0_g1	PREDICTED: inactive leucine-rich repeat receptor-like serine/threonine-protein kinase At1g60630 [Nelumbo nucifera]|XP_010250159.1 PREDICTED: inactive leucine-rich repeat receptor-like serine/threonine-protein kinase At1g60630 [Nelumbo nucifera]|XP_010250167.1 PREDICTED: inactive leucine-rich repeat receptor-like serine/threonine-protein kinase At1g60630 [Nelumbo nucifera]|XP_010250175.1 PREDICTED…	Inactive leucine-rich repeat receptor-like serine/threonine-protein kinase At1g60630 OS=Arabidopsis thaliana OX=3702 GN=At1g60630 PE=2 SV=1	Protein kinase domain;Protein tyrosine kinase;Leucine Rich repeats (2 copies);Leucine rich repeat N-terminal domain;Leucine rich repeat	-	-	-	-	-	1.26	1.26	1.75	1.07	0.89	1.04	1.73	2.03	2.01	0.17	0.57	0.53
TR14028_c0_g1	BTB/POZ and MATH domain-containing protein 1-like protein [Cinnamomum micranthum f. kanehirae]	BTB/POZ and MATH domain-containing protein 2 OS=Arabidopsis thaliana OX=3702 GN=BPM2 PE=1 SV=1	-	-	-	-	-	-	0.03	0	0.07	0.86	1.07	0.77	0.92	0.87	0.65	0.5	0.53	0.41
TR14033_c0_g1	PREDICTED: protein REVEILLE 1 [Nelumbo nucifera]	Protein REVEILLE 1 OS=Arabidopsis thaliana OX=3702 GN=RVE1 PE=2 SV=1	Myb-like DNA-binding domain	-	-	-	-	-	11.51	12.33	13.35	24.24	23.39	23.84	27.12	28.1	28	20.73	19.88	19.46
TR14034_c1_g1	DUF3550 domain-containing protein [Cephalotus follicularis]	Palmitoyl-acyl carrier protein thioesterase, chloroplastic OS=Gossypium hirsutum OX=3635 GN=FATB1 PE=1 SV=1	-	-	-	-	-	-	0.09	0	0	0	0	0.11	1.51	1.51	2.1	0.13	0.06	0
TR1404_c0_g1	hypothetical protein AQUCO_02600432v1 [Aquilegia coerulea]	G-type lectin S-receptor-like serine/threonine-protein kinase LECRK3 OS=Oryza sativa subsp. japonica OX=39947 GN=LECRK3 PE=3 SV=2	Protein kinase domain;Protein tyrosine kinase;D-mannose binding lectin	-	-	-	-	-	42.83	42.21	44.24	72.97	71.86	71.79	58.03	56.83	55.56	18.13	19.48	18.36
TR14048_c0_g1	PREDICTED: 60S ribosomal protein L5 [Camelus bactrianus]	60S ribosomal protein L5 OS=Helianthus annuus OX=4232 GN=RPL5A PE=2 SV=1	Ribosomal large subunit proteins 60S L5, and 50S L18	-	-	-	-	-	10.35	3.04	1.81	0.42	0.57	0.4	1.41	1.85	1.81	0	0	0
TR14061_c0_g1	Ac1-149 [Rattus norvegicus]|AAP92531.1 Ab1-011 [Rattus norvegicus]|AAP92644.1 Cc1-27 [Rattus norvegicus]	Bax inhibitor 1 OS=Arabidopsis thaliana OX=3702 GN=BI-1 PE=1 SV=1	Inhibitor of apoptosis-promoting Bax1	cell death;programmed cell death;biological_process;cellular process;response to stress;response to stimulus;cellular response to stimulus;negative regulation of biological process;regulation of biological process;regulation of cellular process;biological regulation;apoptotic process;negative regulation of cellular process;cellular response to stress	-	-	-	-	1.96	0.53	0.46	0.09	0.12	0.1	0.27	0.28	0.38	0.09	0.1	0
TR14064_c0_g1	hypothetical protein AQUCO_00500645v1 [Aquilegia coerulea]	-	Myb/SANT-like DNA-binding domain	-	-	-	-	-	1.19	2.32	1.69	1.1	1.02	1	1.71	2.1	1.78	4.79	3.65	3.42
TR14073_c0_g1	ERBB receptor feedback inhibitor 1 [Rattus norvegicus]|XP_008762482.1 PREDICTED: ERBB receptor feedback inhibitor 1 isoform X1 [Rattus norvegicus]|XP_008762483.1 PREDICTED: ERBB receptor feedback inhibitor 1 isoform X1 [Rattus norvegicus]|P05432.1 RecName: Full=ERBB receptor feedback inhibitor 1	-	-	metabolic process;regulation of protein phosphorylation;negative regulation of protein phosphorylation;signal transduction;transmembrane receptor protein tyrosine kinase signaling pathway;cellular protein modification process;protein phosphorylation;negative regulation of protein kinase activity;phosphorus metabolic process;phosphate-containing compound metabolic process;nitrogen compound metabol…	protein binding;molecular_function;binding;protein domain specific binding;enzyme binding;kinase binding;GTPase binding;SH3 domain binding;small GTPase binding;protein kinase binding	plasma membrane;intracellular;cellular_component;extrinsic component of membrane;membrane;cell;cytoplasm;intracellular membrane-bounded organelle;cytoplasmic side of plasma membrane;extrinsic component of plasma membrane;organelle;membrane-bounded organelle;intracellular organelle;intracellular part;membrane part;cytoplasmic part;plasma membrane part;cell part;cell periphery;side of membrane;cyto…	-	-	0.73	0.25	0.24	0.03	0.02	0.09	0.09	0.14	0.11	0	0.01	0.03
TR140732_c0_g1	-	-	-	-	-	-	-	-	1.15	1.31	2.07	0.06	0.09	0	0.18	0.04	0	0	0	0
TR14074_c1_g2	-	-	-	-	-	-	-	-	0.63	0.55	0.49	3.85	4.16	3.26	0.21	0.26	0.33	1.17	1.25	1.16
TR14082_c0_g1	hypothetical protein AQUCO_00900064v1 [Aquilegia coerulea]	WAT1-related protein At5g07050 OS=Arabidopsis thaliana OX=3702 GN=At5g07050 PE=2 SV=1	EamA-like transporter family	-	-	-	-	-	21.66	19.63	22.2	5.66	5.85	5.65	21.81	23.21	22.04	8.91	8.39	8.53
TR14082_c0_g2	Drug/metabolite transporter [Macleaya cordata]	WAT1-related protein At5g07050 OS=Arabidopsis thaliana OX=3702 GN=At5g07050 PE=2 SV=1	EamA-like transporter family	-	-	-	-	-	0.75	0.85	0.98	0.76	0.58	0.81	3.25	2.92	3.34	0.37	0.49	0.6
TR14085_c0_g2	uncharacterized protein LOC114298932 [Camellia sinensis]	-	Enoyl-(Acyl carrier protein) reductase;short chain dehydrogenase;short chain dehydrogenase	-	-	-	-	-	5.71	5.68	5.1	5.52	4.87	5.2	6.56	5.86	6.64	19.2	19.41	19.29
TR14088_c0_g1	PREDICTED: heterogeneous nuclear ribonucleoprotein U-like protein 1 isoform X1 [Capra hircus]	-	AAA domain;SPRY domain;SAP domain	-	-	-	-	-	2.37	0.38	0.49	0.16	0.25	0.2	0.38	0.16	0.19	0.19	0.05	0.22
TR14097_c0_g2	-	-	-	-	-	-	-	-	0	1.14	0.72	1.02	0.65	0	0	0.72	0	8.27	9.83	10.07
TR141_c0_g1	hypothetical protein AQUCO_00200808v1, partial [Aquilegia coerulea]	UDP-glycosyltransferase 83A1 OS=Arabidopsis thaliana OX=3702 GN=UGT83A1 PE=2 SV=1	-	-	-	-	-	-	2.25	1.88	1.87	2.93	2.41	2.95	1.81	1.34	1.47	4.27	4.37	4.53
TR1410_c0_g1	hypothetical protein AQUCO_06000061v1 [Aquilegia coerulea]	Serine carboxypeptidase-like 18 OS=Arabidopsis thaliana OX=3702 GN=SCPL18 PE=2 SV=2	Serine carboxypeptidase;Serine carboxypeptidase	-	-	-	-	-	8.32	8.85	8.92	9.44	9.58	9.52	4.8	4.06	4.13	9.72	9	8.96
TR14105_c0_g1	PREDICTED: pathogenesis-related protein STH-21 [Eucalyptus grandis]|KCW61233.1 hypothetical protein EUGRSUZ_H03995 [Eucalyptus grandis]	Major allergen Pru ar 1 OS=Prunus armeniaca OX=36596 PE=1 SV=1	-	-	-	-	-	-	59.57	58.27	56.48	110.65	107.72	116.9	120.99	125.68	131.34	118.22	115.12	116.49
TR14109_c0_g1	PREDICTED: protein HYPER-SENSITIVITY-RELATED 4-like [Nelumbo nucifera]	Protein HYPER-SENSITIVITY-RELATED 4 OS=Arabidopsis thaliana OX=3702 GN=HSR4 PE=2 SV=1	Domain associated at C-terminal with AAA;ATPase family associated with various cellular activities (AAA)	-	-	-	-	-	2.41	2.44	2.76	2.04	1.8	1.87	1.39	0.84	0.78	0	0.11	0.12
TR1411_c0_g2	NAC domain-containing protein 68-like [Papaver somniferum]|RZC79089.1 hypothetical protein C5167_003312 [Papaver somniferum]	NAC domain-containing protein 68 OS=Oryza sativa subsp. japonica OX=39947 GN=NAC068 PE=2 SV=1	No apical meristem (NAM) protein	-	-	-	-	-	12.69	11.51	12.47	4.79	4.19	4.21	14.48	13.19	13.54	5.08	4.86	5.36
TR14110_c3_g1	Protein of unknown function DUF791 [Macleaya cordata]	-	Sugar-tranasporters, 12 TM	-	-	-	-	-	2.66	2.5	2.84	1.98	2.78	1.88	0.72	0.66	0.68	0.73	1.04	0.81
TR14116_c0_g1	U1 small nuclear ribonucleoprotein polypeptide A (predicted), isoform CRA_e [Rattus norvegicus]	U1 small nuclear ribonucleoprotein 70 kDa OS=Arabidopsis thaliana OX=3702 GN=RNU1 PE=1 SV=1	-	-	-	-	-	-	1.04	0.46	0.63	0.07	0.05	0.05	0.34	0.21	0	0	0.06	0
TR1412_c0_g1	-	-	-	-	-	-	-	-	8.07	5.27	6.9	13.51	13.53	14.13	8.42	7.78	9.31	9.47	11.29	9.51
TR1412_c1_g2	-	-	-	-	-	-	-	-	2.04	2.21	1.68	7.42	7.83	7.56	5.63	5.94	6	4.04	4.35	4.44
TR1413_c0_g2	Glycoside hydrolase [Macleaya cordata]	Endochitinase EP3 OS=Arabidopsis thaliana OX=3702 GN=EP3 PE=1 SV=1	Chitinase class I;Chitin recognition protein	-	-	-	K01183|E3.2.1.14; chitinase [EC:3.2.1.14]	ko00520(Metabolism);ko01100(Metabolism)	0	0.12	0	0.86	0.78	0.95	0.14	0.33	0.14	3.87	2.87	2.53
TR1413_c0_g3	endochitinase EP3-like [Hevea brasiliensis]	Endochitinase EP3 OS=Arabidopsis thaliana OX=3702 GN=EP3 PE=1 SV=1	-	-	-	-	-	-	582.53	618.37	594.96	864.66	857.46	865.43	314.39	335.52	346.2	93.1	90.09	101.53
TR1413_c1_g1	-	Enolase OS=Oryza sativa subsp. japonica OX=39947 GN=ENO1 PE=1 SV=2	-	-	-	-	-	-	25.48	21.94	21.76	17.25	22.23	20.2	7.67	9.21	14.01	5.99	8.88	4.47
TR1413_c2_g1	Glycoside hydrolase [Macleaya cordata]	Basic endochitinase CHB4 OS=Brassica napus OX=3708 PE=1 SV=2	-	-	-	-	-	-	71.24	92.25	60.48	22.64	23.74	21.74	111.66	136.21	100.13	10.79	15.29	10.82
TR1413_c3_g1	PREDICTED: endochitinase PR4 [Eucalyptus grandis]	Endochitinase At2g43590 OS=Arabidopsis thaliana OX=3702 GN=At2g43590 PE=2 SV=1	-	-	-	-	-	-	471.96	491.67	421.03	540.42	575.3	546.26	237.98	233.27	246.41	67.65	62.66	64.66
TR14137_c0_g1	heterogeneous nuclear ribonucleoprotein L [Mus musculus]|NP_116008.2 heterogeneous nuclear ribonucleoprotein L isoform b [Rattus norvegicus]|XP_005371319.1 heterogeneous nuclear ribonucleoprotein L isoform X2 [Microtus ochrogaster]|XP_006539621.1 PREDICTED: heterogeneous nuclear ribonucleoprotein L isoform X3 [Mus musculus]|XP_021052614.1 heterogeneous nuclear ribonucleoprotein L isoform X2 [Mus …	-	RNA recognition motif. (a.k.a. RRM, RBD, or RNP domain)	-	-	-	-	-	3.01	0.56	1.15	0.25	0.14	0.28	0.43	0.34	0.15	0.17	0.08	0.26
TR14145_c0_g1	Late embryogenesis abundant protein [Macleaya cordata]	-	Late embryogenesis abundant protein	-	-	-	-	-	2.91	2.92	3.4	0.11	0.15	0.23	3.06	2.88	1.94	0.48	0.37	0.68
TR14148_c0_g2	mCG1042149, partial [Mus musculus]	-	-	-	-	-	-	-	3.99	1.03	0.86	0.23	0.25	0.13	1.37	0.54	0.27	0.64	0.08	0
TR14152_c0_g1	Elongation factor [Macleaya cordata]	-	-	-	-	-	-	-	14.12	17.27	17.14	14.36	13.52	13.35	7.99	6.07	5.86	4.54	3.6	4.21
TR1416_c0_g1	Cytochrome P450 [Macleaya cordata]	Cytochrome P450 CYP72A219 OS=Panax ginseng OX=4054 PE=2 SV=1	Cytochrome P450	-	-	-	-	-	17.41	17.44	17.09	4.82	4.73	4.8	2.66	2.41	3.27	2.21	2.43	2.96
TR14167_c0_g1	2,3-bisphosphoglycerate-independent phosphoglycerate mutase [Sesamum indicum]|XP_011100488.1 2,3-bisphosphoglycerate-independent phosphoglycerate mutase [Sesamum indicum]|XP_011100489.1 2,3-bisphosphoglycerate-independent phosphoglycerate mutase [Sesamum indicum]|XP_020554998.1 2,3-bisphosphoglycerate-independent phosphoglycerate mutase [Sesamum indicum]	2,3-bisphosphoglycerate-independent phosphoglycerate mutase OS=Mesembryanthemum crystallinum OX=3544 GN=PGM1 PE=2 SV=1	Metalloenzyme superfamily	-	-	-	-	-	1.99	2.6	3.09	0.76	0.8	0.63	3.63	3.66	3.69	0.86	1.24	1.73
TR1417_c0_g1	PREDICTED: uncharacterized protein LOC104592069 [Nelumbo nucifera]	-	Cotton fibre expressed protein	-	-	-	-	-	67.48	71.31	64.08	77.46	75.1	76.1	133.15	135.5	134.54	464.58	469.87	475.07
TR1417_c1_g1	hypothetical protein BVC80_8713g9 [Macleaya cordata]	-	Fanconi anaemia protein FancD2 nuclease;Fanconi anaemia protein FancD2 nuclease	-	-	-	K10891|FANCD2; fanconi anemia group D2 protein	ko03460(Genetic Information Processing)	0.14	0.1	0.11	0.17	0.16	0.17	0.42	0.54	0.36	0.87	0.88	1.14
TR14177_c0_g1	AGAMOUS-like 66 isoform 1 [Theobroma cacao]	Agamous-like MADS-box protein AGL104 OS=Arabidopsis thaliana OX=3702 GN=AGL104 PE=1 SV=1	SRF-type transcription factor (DNA-binding and dimerisation domain)	-	-	-	-	-	0	0.04	0	0.03	0	0.05	5.77	5.1	5.84	0.36	0.09	0.18
TR14179_c1_g1	Protein of unknown function DUF604 [Macleaya cordata]	-	Protein of unknown function, DUF604;Fringe-like	-	-	-	-	-	3.61	4.39	4.11	4.68	4.23	4.17	7.52	8.4	6.83	16.96	14.95	15.73
TR1418_c0_g1	PREDICTED: uncharacterized protein LOC104454618 [Eucalyptus grandis]|KCW66044.1 hypothetical protein EUGRSUZ_G03335 [Eucalyptus grandis]	-	-	-	-	-	-	-	2.49	2.1	2.14	2.43	2.61	2.72	6.02	4.55	5.06	10.52	10.99	9.53
TR1418_c0_g2	PREDICTED: somatic embryogenesis receptor kinase 2-like [Erythranthe guttata]|EYU35664.1 hypothetical protein MIMGU_mgv1a013556mg [Erythranthe guttata]	Leucine-rich repeat protein 1 OS=Arabidopsis thaliana OX=3702 GN=LRR1 PE=1 SV=1	-	-	-	-	-	-	5.14	4.89	5.61	15.5	15.39	15.97	9.17	8.78	7.44	11.96	12.71	12.69
TR14195_c0_g3	NAC domain containing protein [Trema orientale]	NAC domain-containing protein 13 OS=Arabidopsis thaliana OX=3702 GN=NAC013 PE=1 SV=1	No apical meristem (NAM) protein	-	-	-	-	-	2.06	3.93	3.25	1.69	1.19	1.32	3.67	4.56	9.14	1.53	1.09	1.52
TR14202_c0_g1	-	-	-	-	-	-	-	-	8.25	7.86	6.96	1.74	1.73	1.97	2.98	3.92	4.51	0.81	0.48	1.42
TR14203_c0_g1	-	-	-	-	-	-	-	-	0.57	2.31	1.47	13.8	9.24	18.02	4.53	1.83	2.78	0.95	2.06	1.8
TR14207_c0_g1	Protein kinase domain [Macleaya cordata]	-	-	-	-	-	-	-	11.91	13.13	12.96	33.63	31.12	27.09	25.79	34.86	34.93	35.72	62.93	39.97
TR14211_c0_g1	-	-	-	-	-	-	-	-	0	0	0.41	0	0.38	0	4.64	2.85	6.45	0	0.24	1.02
TR14216_c0_g1	USP34 protein [Homo sapiens]	-	-	-	-	-	-	-	0.97	0.39	0.36	0.06	0.03	0.15	0.24	0.3	0.09	0.15	0.09	0.07
TR14217_c0_g1	PREDICTED: esterase-like isoform X1 [Nelumbo nucifera]	GDSL esterase/lipase At3g26430 OS=Arabidopsis thaliana OX=3702 GN=At3g26430 PE=2 SV=1	GDSL-like Lipase/Acylhydrolase	-	-	-	-	-	8.8	7.55	10.3	37.06	40.26	40.79	192.31	174.43	178.09	32.04	38.11	34.92
TR1422_c1_g1	PREDICTED: serine hydroxymethyltransferase 1, mitochondrial [Juglans regia]	Serine hydroxymethyltransferase 1, mitochondrial OS=Flaveria pringlei OX=4226 PE=2 SV=1	Serine hydroxymethyltransferase	-	-	-	K00600|glyA, SHMT; glycine hydroxymethyltransferase [EC:2.1.2.1]	ko00260(Metabolism);ko00460(Metabolism);ko00630(Metabolism);ko00670(Metabolism);ko00680(Metabolism);ko01100(Metabolism);ko01110(Metabolism);ko01120(Metabolism);ko01200(Metabolism);ko01230(Metabolism)	16.49	14.01	18.89	8.1	7.07	8.48	3.97	2.61	1.44	1.95	1.11	1.56
TR14224_c1_g2	PREDICTED: uncharacterized protein LOC104594458 [Nelumbo nucifera]	-	-	-	-	-	-	-	0	0	0	0	0	0	0	0.03	0	0.97	0.54	0.97
TR14225_c0_g1	-	-	-	-	-	-	-	-	18.83	25.31	20	0.72	1.24	0	0	0.22	0.87	1.61	3.5	1.85
TR14226_c0_g1	-	-	-	-	-	-	-	-	9.1	10.23	7.7	12.18	11.27	10.91	0.55	1.06	1.11	0.9	1.49	1.35
TR14227_c0_g1	hypothetical protein LR48_Vigan03g132300 [Vigna angularis]	Vesicle-associated membrane protein 722 OS=Arabidopsis thaliana OX=3702 GN=VAMP722 PE=2 SV=2	-	-	-	-	-	-	0.29	0.24	0.31	0.27	0.28	0.34	1.08	1.14	1.21	0.17	0.17	0.24
TR14230_c0_g1	Transposon Tf2-2 polyprotein [Vitis vinifera]	RNA-directed DNA polymerase homolog OS=Oenothera berteroana OX=3950 PE=4 SV=1	Reverse transcriptase (RNA-dependent DNA polymerase);Retrotransposon gag protein;Integrase core domain;Chromo (CHRromatin Organisation MOdifier) domain;gag-polyprotein putative aspartyl protease;Retroviral aspartyl protease;Aspartyl protease;Retroviral aspartyl protease	-	-	-	-	-	3.91	4.14	3.78	1.47	1.55	1.58	1.01	1.08	1.04	1.25	1.3	1.24
TR14234_c0_g1	protein of unknown function DUF4378 [Macleaya cordata]	-	Domain of unknown function (DUF4378);DUF761-associated sequence motif	-	-	-	-	-	0.35	0.29	0.4	1.96	1.72	1.77	1.43	1.82	1.45	0.35	0.49	0.53
TR14246_c0_g1	BTB/POZ-like [Macleaya cordata]	BTB/POZ domain-containing protein At1g63850 OS=Arabidopsis thaliana OX=3702 GN=At1g63850 PE=1 SV=1	-	-	-	-	-	-	0.52	0.58	1.22	1.99	2.07	1.55	1.51	0.99	1.37	1.51	1.19	1.33
TR14248_c0_g1	-	-	-	-	-	-	-	-	2.67	1.58	2.57	0.71	0.44	0.54	2.37	3.18	2.16	3.03	3.01	3.61
TR14250_c0_g1	ZF-HD homeobox protein [Cinnamomum micranthum f. kanehirae]	Mini zinc finger protein 1 OS=Oryza sativa subsp. indica OX=39946 GN=MIF1 PE=3 SV=1	ZF-HD protein dimerisation region	-	-	-	-	-	0.28	0.14	0.24	1.18	1.15	0.87	0.56	0.23	0.58	6.18	7.81	7.89
TR14252_c0_g2	NADH dehydrogenase subunit 2 (mitochondrion) [Macaca cyclopis]|AIS35755.1 NADH dehydrogenase subunit 2 (mitochondrion) [Macaca cyclopis]	NAD(P)H-quinone oxidoreductase subunit 2, chloroplastic OS=Marchantia polymorpha OX=3197 GN=ndhB PE=3 SV=1	-	-	-	-	-	-	9.51	2.08	2.22	0.29	0.4	0.77	1.61	1.55	0.43	0.22	0.07	0
TR14255_c0_g1	PREDICTED: uncharacterized protein ycf39 isoform X1 [Nelumbo nucifera]	Divinyl chlorophyllide a 8-vinyl-reductase, chloroplastic OS=Oryza sativa subsp. japonica OX=39947 GN=DVR PE=3 SV=1	NmrA-like family;NAD(P)H-binding;NAD dependent epimerase/dehydratase family	-	-	-	-	-	5.74	5.64	5.54	4.19	4.01	4.23	2.99	3.28	2.5	4.89	7.23	5.03
TR14262_c0_g1	hypothetical protein VITISV_024119 [Vitis vinifera]	Receptor-like protein 9DC3 OS=Solanum pimpinellifolium OX=4084 GN=9DC3 PE=3 SV=1	-	-	-	-	-	-	7.46	8.71	9.1	8.01	8.42	6.14	3.1	4.49	4	4.11	4.26	5.14
TR14263_c0_g1	-	-	-	-	-	-	-	-	66.67	74.55	51.3	29.47	37.37	27.15	68.41	76.41	77.29	97.23	115.6	95.33
TR14265_c0_g1	-	V-type proton ATPase 16 kDa proteolipid subunit OS=Gossypium hirsutum OX=3635 GN=CVA16-2 PE=2 SV=1	-	-	-	-	-	-	8.02	11.4	9.5	10.38	15.68	15.17	1.83	1.77	2.28	4.5	0.34	0.73
TR14268_c0_g1	-	-	-	-	-	-	-	-	3.58	3.47	2.93	12.81	9.42	11.4	2.88	3.22	1.25	6.61	14.24	17.38
TR1428_c3_g1	dirigent protein 22-like [Momordica charantia]	Dirigent protein 3 OS=Arabidopsis thaliana OX=3702 GN=DIR3 PE=3 SV=1	Dirigent-like protein	-	-	-	-	-	4.64	6.3	5.77	2.83	1.95	2.24	1.27	0.78	1.22	0.21	0.4	0.42
TR14281_c1_g1	mKIAA0325 protein, partial [Mus musculus]	Cytoplasmic dynein 2 heavy chain 1 OS=Chlamydomonas reinhardtii OX=3055 GN=DHC1B PE=1 SV=2	Dynein heavy chain and region D6 of dynein motor	-	-	-	-	-	2.11	0.75	0.63	0.19	0	0.19	0.66	0.23	0.16	0.1	0.05	0.05
TR14282_c0_g1	spectrin, alpha, non-erythrocytic 1 (alpha-fodrin) variant, partial [Homo sapiens]	-	Spectrin repeat;Ca2+ insensitive EF hand;SH3 domain;EF hand;EF-hand domain pair;Variant SH3 domain;EF-hand domain;EF-hand domain pair;Variant SH3 domain;EF hand	-	-	-	-	-	1.17	0.36	0.42	0.15	0.11	0.22	0.41	0.26	0.14	0.16	0.08	0.16
TR14292_c0_g1	SANT/Myb domain [Macleaya cordata]	Transcription factor MYB102 OS=Arabidopsis thaliana OX=3702 GN=MYB102 PE=2 SV=1	Myb-like DNA-binding domain;Myb-like DNA-binding domain	-	-	-	-	-	5.95	6.56	7.67	1.55	1.57	1.47	1.26	1.39	1.54	0.61	0.72	0.89
TR14293_c0_g1	heat shock 105kDa/110kDa protein 1, isoform CRA_d [Homo sapiens]	Heat shock 70 kDa protein 14 OS=Arabidopsis thaliana OX=3702 GN=HSP70-14 PE=1 SV=1	Hsp70 protein	metabolic process;cellular protein modification process;protein phosphorylation;phosphorus metabolic process;phosphate-containing compound metabolic process;nitrogen compound metabolic process;biological_process;cellular process;phosphorylation;regulation of phosphate metabolic process;regulation of metabolic process;protein metabolic process;regulation of cellular metabolic process;regulation of…	molecular_function;binding;small molecule binding;organic cyclic compound binding;nucleoside phosphate binding;heterocyclic compound binding;nucleotide binding	intracellular;cellular_component;cell;intracellular membrane-bounded organelle;organelle;membrane-bounded organelle;intracellular organelle;organelle part;intracellular part;cell part;intracellular organelle part;cytoplasm;nucleus	-	-	1.02	0.26	0.42	0.06	0.03	0.09	0.12	0.17	0.13	0	0.02	0.15
TR14294_c0_g1	Lipase [Macleaya cordata]	GDSL esterase/lipase At1g09390 OS=Arabidopsis thaliana OX=3702 GN=At1g09390 PE=2 SV=1	GDSL-like Lipase/Acylhydrolase	-	-	-	-	-	1.1	0.78	1.47	0.7	0.09	0.51	0.61	1	1.08	0	0.06	0.06
TR14295_c0_g1	PREDICTED: uncharacterized protein LOC104600570 isoform X1 [Nelumbo nucifera]	-	-	-	-	-	-	-	1.27	1.38	1.79	3.29	2.31	3.12	1.46	1.15	1.52	1.09	1.14	0.57
TR14303_c0_g1	chloroplast carbonic anhydrase [Pachysandra terminalis]	Carbonic anhydrase, chloroplastic OS=Nicotiana tabacum OX=4097 PE=2 SV=1	Carbonic anhydrase	-	-	-	K01673|cynT, can; carbonic anhydrase [EC:4.2.1.1]	ko00910(Metabolism);ko01100(Metabolism)	12.56	13.52	14.95	2.94	1.94	2.56	0.58	0.58	0.65	0.1	0.05	0.26
TR14305_c0_g1	-	-	-	-	-	-	-	-	0.5	0	0	0	0.58	1.31	7.23	6.98	9.14	1.62	2.53	0
TR14307_c1_g1	-	-	-	-	-	-	-	-	0	0	0.59	2.68	6.34	1.18	0	0	0.29	0	0.17	0
TR14316_c0_g1	-	-	-	-	-	-	-	-	1.31	1.11	0.62	2.25	2.63	2.83	1.92	1.61	2.19	0.4	0.61	0.58
TR14317_c0_g1	Rps16 protein [Mus musculus]	40S ribosomal protein S16 OS=Gossypium hirsutum OX=3635 GN=RPS16 PE=2 SV=1	Ribosomal protein S9/S16	-	-	-	K02960|RP-S16e, RPS16; small subunit ribosomal protein S16e	ko03010(Genetic Information Processing)	10	1.93	3.64	0.95	0.86	0.75	1.36	1.39	0.61	0.93	0.53	0
TR1432_c1_g1	hypothetical protein AQUCO_02400058v1 [Aquilegia coerulea]	-	-	-	-	-	-	-	27.81	26.77	25.51	10.94	11.18	10.96	17.38	19.16	20	19.17	20.63	20
TR1432_c2_g1	NAC transcription factor [Actinidia chinensis var. chinensis]	-	-	-	-	-	-	-	1.6	1.16	1.38	0.96	1.24	1.46	0.16	0.45	0.24	0.14	0.35	0.34
TR14320_c0_g1	serine/threonine-protein phosphatase 7 long form [Cinnamomum micranthum f. kanehirae]	-	-	-	-	-	-	-	1.89	2.25	2.05	1.86	1.77	1.74	1.63	1.59	1.96	0.73	0.39	0.54
TR14321_c0_g1	hypothetical protein MANES_S045500 [Manihot esculenta]	-	-	-	-	-	-	-	8.73	9.06	10.25	15.77	19.31	16.5	13.05	13.15	13.22	3.21	3.06	1.68
TR14327_c0_g2	Cytidine monophosphate (UMP-CMP) kinase 1 [Mus musculus]	UMP-CMP kinase 3 OS=Arabidopsis thaliana OX=3702 GN=UMK3 PE=1 SV=1	Adenylate kinase;AAA domain	metabolic process;nucleobase-containing compound metabolic process;cellular aromatic compound metabolic process;nucleoside phosphate metabolic process;phosphorus metabolic process;phosphate-containing compound metabolic process;nitrogen compound metabolic process;biological_process;nucleotide metabolic process;nucleoside diphosphate metabolic process;cellular process;phosphorylation;organophospha…	molecular_function;catalytic activity;kinase activity;transferase activity;transferase activity, transferring phosphorus-containing groups;phosphotransferase activity, phosphate group as acceptor;nucleobase-containing compound kinase activity;nucleoside monophosphate kinase activity;nucleotide binding;binding;drug binding;purine nucleotide binding;adenyl nucleotide binding;ribonucleotide binding;…	intracellular;cellular_component;extracellular region;extracellular space;cell;intracellular membrane-bounded organelle;vesicle;organelle;membrane-bounded organelle;intracellular organelle;extracellular organelle;extracellular region part;intracellular part;cell part;extracellular vesicle;cytoplasm;extracellular exosome;nucleus	K13800|CMPK1, UMPK; UMP-CMP kinase [EC:2.7.4.14]	ko00240(Metabolism);ko00983(Metabolism);ko01100(Metabolism)	0.93	0.47	0.25	0	0.05	0	0.1	0.16	0.05	0.12	0	0.06
[truncated: 7,012 more rows]

## Sheet: G vs T
gene_id	NR_annotation	Swissprot_annotation	Pfam_annotation	BP_annotation	MF_annotation	CC_annotation	KO_annotation	Pathway_annotation	FPKM_ G1	FPKM_ G2	FPKM_ G3	FPKM_ T1	FPKM_ T2	FPKM_ T3	FPKM_ P1	FPKM_ P2	FPKM_ P3	FPKM_ C1	FPKM_ C2	FPKM_ C3
[truncated: 4,305 more rows]

[truncated: 2 more sheets: T vs P, P vs C]
