# Supplementary material for: Integrative Metabolomic and Transcriptomic Landscape during Akebia trifoliata Fruit Ripening and Cracking
Source: Int J Mol Sci. 2023 Nov 24;24(23):16732. doi: 10.3390/ijms242316732 (PMC10706055; doi:10.3390/ijms242316732)
Supplement: Supplementary file 1 [file ijms-24-16732-s001.zip › Table S3.xlsx]

## Sheet: Sheet1
gene_id	NR_annotation	Swissprot_annotation	Pfam_annotation	BP_annotation	MF_annotation	CC_annotation	KO_annotation	Pathway_annotation	FPKM_ G1	FPKM_ G2	FPKM_ G3	FPKM_ T1	FPKM_ T2	FPKM_ T3	FPKM_ P1	FPKM_ P2	FPKM_ P3	FPKM_ C1	FPKM_ C2	FPKM_ C3
TR10070_c0_g1	LRAT-like domain [Macleaya cordata]	-	-	-	-	-	-	-	1332.71	1356.58	1321.95	236.14	244.07	247.14	79.64	87.27	89.2	249.54	259.92	260.73
TR3651_c3_g1	PREDICTED: dirigent protein 22 [Vitis vinifera]|RVW81433.1 Dirigent protein 21 [Vitis vinifera]	Dirigent protein 21 OS=Arabidopsis thaliana OX=3702 GN=DIR21 PE=3 SV=1	Dirigent-like protein	-	-	-	-	-	902.91	864.07	953.71	56.85	58.59	56.91	434.01	452.02	474.05	24.39	20.02	26.03
TR3374_c0_g1	Retrovirus-related Pol polyprotein from transposon TNT 1-94 [Apostasia shenzhenica]	Curculin-2 OS=Molineria latifolia OX=4676 PE=1 SV=1	D-mannose binding lectin	-	-	-	-	-	615.87	602.49	580.09	153.87	158.2	155.96	23.65	20.96	25.6	6.61	3.06	6.95
TR5638_c0_g2	-	-	-	-	-	-	-	-	517.17	487.81	465.56	1079.45	1051.11	1023.91	196.88	185.64	172.8	396.13	399.29	419.43
TR2305_c1_g1	PREDICTED: uncharacterized protein LOC103948583 [Pyrus x bretschneideri]	-	-	-	-	-	-	-	470.59	479.34	508.99	160.82	157.93	162.87	68.26	68.45	74.59	12.34	9.78	11.17
TR32879_c0_g1	cytochrome P450 CYP82D47-like [Hevea brasiliensis]	Cytochrome P450 82C4 OS=Arabidopsis thaliana OX=3702 GN=CYP82C4 PE=2 SV=1	-	-	-	-	-	-	265.79	291.24	299.65	582.75	592.47	615.67	1718.19	1612.72	1657.02	3154.36	2958.56	3100
TR3776_c0_g1	hypothetical protein AQUCO_01400613v1, partial [Aquilegia coerulea]	Cytochrome P450 82A4 OS=Glycine max OX=3847 GN=CYP82A4 PE=2 SV=1	Cytochrome P450	-	-	-	-	-	233.89	263.44	260.48	514.21	496.7	514.96	1374.42	1394.34	1246.25	2687.39	2426.45	2754.52
TR10753_c1_g3	2Fe-2S ferredoxin-type domain [Macleaya cordata]	Ferredoxin-1, chloroplastic OS=Solanum lycopersicum OX=4081 GN=SEND33 PE=2 SV=1	2Fe-2S iron-sulfur cluster binding domain	-	-	-	K02639|petF; ferredoxin	ko00195(Metabolism)	204.9	214.52	204.23	83.35	82.18	85.45	44.47	43.63	39.26	9.94	8.07	9.87
TR1887_c0_g4	Pectinesterase inhibitor domain [Macleaya cordata]	Putative invertase inhibitor OS=Platanus acerifolia OX=140101 PE=1 SV=1	Plant invertase/pectin methylesterase inhibitor	-	-	-	-	-	187.73	183.28	211.27	723.87	763.64	724.84	2295.15	2202.73	2370.75	5774.02	5827.95	5254.64
TR11218_c0_g1	-	-	-	-	-	-	-	-	177.62	169.59	141.86	52.69	51.29	49.42	216.08	204.99	210.9	40.96	27.13	32.24
TR63637_c0_g1	GH3 auxin-responsive promoter [Corchorus olitorius]	Probable indole-3-acetic acid-amido synthetase GH3.1 OS=Arabidopsis thaliana OX=3702 GN=GH3.1 PE=2 SV=1	GH3 auxin-responsive promoter;GH3 auxin-responsive promoter	-	-	-	K14487|GH3; auxin responsive GH3 gene family	ko04075(Environmental Information Processing)	159.9	170.34	158.89	22.25	22.68	22.9	61.15	62.87	56.97	16.41	14.58	15.78
TR46430_c0_g1	hypothetical protein AQUCO_01500417v1 [Aquilegia coerulea]	-	-	-	-	-	-	-	155.44	132.41	140.06	402.78	428.28	433.03	177.36	211.49	206.37	44.43	35.23	27.98
TR4436_c0_g2	PREDICTED: galactinol synthase 1 [Vitis vinifera]|ARS22083.1 galactinol synthase [Vitis vinifera]|RVW43445.1 Galactinol synthase 1 [Vitis vinifera]	Galactinol synthase 1 OS=Ajuga reptans OX=38596 GN=GOLS1 PE=1 SV=1	Glycosyl transferase family 8	-	-	-	K18819|GOLS; inositol 3-alpha-galactosyltransferase [EC:2.4.1.123]	ko00052(Metabolism);ko01100(Metabolism)	140.97	139.4	136.94	26.35	26.16	28.61	6.7	7.48	7.18	2.07	1.29	2.04
TR15214_c0_g2	conserved hypothetical protein [Cupriavidus taiwanensis]|SPK70219.1 conserved hypothetical protein [Cupriavidus taiwanensis]|SPK70182.1 conserved hypothetical protein [Cupriavidus taiwanensis]|SPA12625.1 conserved hypothetical protein [Cupriavidus taiwanensis]|SPC10523.1 conserved hypothetical protein [Cupriavidus oxalaticus]|SPC05492.1 conserved hypothetical protein [Cupriavidus oxalaticus]	-	-	-	-	-	-	-	137.19	67.75	562.08	7.35	16.67	18.75	38.05	33.14	110.14	17.61	10.03	9.21
TR19219_c1_g1	-	-	-	-	-	-	-	-	120.29	111.13	115.69	16.29	11.07	9.44	48.56	43.65	52.2	1.4	3.82	2.77
TR11078_c0_g1	trihelix transcription factor ASIL1-like [Hevea brasiliensis]	Trihelix transcription factor ASIL2 OS=Arabidopsis thaliana OX=3702 GN=ASIL2 PE=1 SV=1	Myb/SANT-like DNA-binding domain	-	-	-	-	-	116.62	115.76	125.77	410.59	389.92	406.53	150.48	152.93	153.05	434.34	415.18	401.33
TR4676_c0_g1	Cytochrome P450 [Theobroma cacao]	Cytochrome P450 81F3 OS=Arabidopsis thaliana OX=3702 GN=CYP81F3 PE=2 SV=1	Cytochrome P450	-	-	-	-	-	111.23	131.78	104.64	258.62	251.18	259.52	81.09	87.45	80.43	16.36	14.82	14.44
TR71528_c0_g1	-	-	-	-	-	-	-	-	110.56	141.53	116.26	19.82	16.41	27.55	145.9	127.9	153.27	16.69	20.6	29.4
TR979_c6_g1	-	-	-	-	-	-	-	-	109.8	121.37	47.34	31.05	28.19	37.16	62.42	78.54	69.57	12.93	21.37	11.95
TR25508_c0_g1	-	-	-	-	-	-	-	-	105.16	102.41	109.53	18.29	18.1	24.42	39.75	47.57	54.48	144.28	146.6	148.17
TR8478_c0_g1	PREDICTED: uncharacterized protein LOC104598951 [Nelumbo nucifera]	-	-	-	-	-	-	-	102.01	107.17	103.47	22.33	18.93	23.15	49.58	52.6	41.13	11.51	9.12	10.78
TR5460_c1_g1	hypothetical protein AQUCO_01700555v1 [Aquilegia coerulea]	Putative calcium-transporting ATPase 13, plasma membrane-type OS=Arabidopsis thaliana OX=3702 GN=ACA13 PE=3 SV=1	Cation transporting ATPase, C-terminus;E1-E2 ATPase;haloacid dehalogenase-like hydrolase;Cation transport ATPase (P-type);Cation transporter/ATPase, N-terminus	-	-	-	-	-	97.32	100.32	101.75	46.32	45.57	46.85	21.45	21.93	21.14	9.26	7.9	8.5
TR31118_c1_g1	-	-	-	-	-	-	-	-	93.61	86.28	116.85	0.96	0.62	0.71	181.06	164.07	166.39	2.63	1.56	1.7
TR32043_c0_g1	isoflavone 2&apos	Isoflavone 3&apos	Cytochrome P450	-	-	-	-	-	88.03	97.34	129.6	241.97	224.72	226.04	68.68	82.82	80.1	11.93	11.93	9.37
TR1888_c0_g1	hypothetical protein AQUCO_01600049v1, partial [Aquilegia coerulea]	Cytochrome P450 82C4 OS=Arabidopsis thaliana OX=3702 GN=CYP82C4 PE=2 SV=1	Cytochrome P450	-	-	-	K00512|CYP17A; steroid 17alpha-monooxygenase / 17alpha-hydroxyprogesterone deacetylase [EC:1.14.14.19 1.14.14.32]	ko00140(Metabolism);ko01100(Metabolism);ko04913(Organismal Systems);ko04917(Organismal Systems);ko04927(Organismal Systems)	87.32	89.85	88.82	215.22	213.28	212.28	501.92	494.16	467.81	907.59	895.4	938.06
TR51214_c0_g1	conserved hypothetical protein [Lactobacillus crispatus ST1]|CBL49888.1 conserved hypothetical protein [Lactobacillus crispatus ST1]|CBL49901.1 conserved hypothetical protein [Lactobacillus crispatus ST1]|CBL51098.1 conserved hypothetical protein [Lactobacillus crispatus ST1]	-	-	-	-	-	-	-	84.96	51.34	333.19	13.58	10.28	16.61	45.71	19.7	49.78	10.44	11.86	9.62
TR12799_c0_g1	unnamed protein product [Rattus norvegicus]	-	Serum albumin family;Ubiquitin carboxyl-terminal hydrolase;Ubiquitin carboxyl-terminal hydrolase	-	-	-	-	-	83.57	19.41	18.47	5.31	6.23	5.45	16.13	15.9	12.53	3.39	2.88	3.7
TR1965_c2_g1	hypothetical protein [uncultured bacterium]	-	-	-	-	-	-	-	82.01	70.67	481.18	7.61	19.33	16.51	43.99	28.41	84.6	19.31	12.02	16.22
TR52020_c0_g1	cytochrome P450 82C4-like [Durio zibethinus]	Cytochrome P450 82C4 OS=Arabidopsis thaliana OX=3702 GN=CYP82C4 PE=2 SV=1	-	-	-	-	-	-	81.87	123.24	125.23	221.26	256.51	234.51	667.15	600.49	537.98	1192.15	1212.23	1246.82
TR1353_c6_g1	PREDICTED: xyloglucan endotransglucosylase/hydrolase 2-like [Nelumbo nucifera]	Xyloglucan endotransglucosylase/hydrolase 2 OS=Glycine max OX=3847 PE=2 SV=1	Glycosyl hydrolases family 16;Xyloglucan endo-transglycosylase (XET) C-terminus	-	-	-	-	-	80.34	90.14	83.69	203.8	204.33	206.78	28.23	29.12	29.77	7.57	7.32	7.91
TR129007_c0_g1	PREDICTED: universal stress protein PHOS32 isoform X1 [Vitis vinifera]	-	-	-	-	-	-	-	74.8	92.9	78.3	0.83	1.49	0.83	69.96	69.05	67.64	1.71	1.14	2.58
TR1413_c2_g1	Glycoside hydrolase [Macleaya cordata]	Basic endochitinase CHB4 OS=Brassica napus OX=3708 PE=1 SV=2	-	-	-	-	-	-	71.24	92.25	60.48	22.64	23.74	21.74	111.66	136.21	100.13	10.79	15.29	10.82
TR19203_c0_g1	-	-	-	-	-	-	-	-	68.05	73.18	71.76	331.29	309.37	302.88	49.2	58.39	52.65	23.88	21.55	22.79
TR23221_c0_g1	F-box domain [Macleaya cordata]	F-box protein AFR OS=Arabidopsis thaliana OX=3702 GN=AFR PE=1 SV=2	-	-	-	-	-	-	67.26	90.84	57.55	11.86	17.97	24.5	74.97	68.25	78.26	14.21	13.17	9.57
TR6214_c1_g1	-	-	-	-	-	-	-	-	67.22	73.5	69.4	23.48	26.24	25.82	73.92	80.12	87.85	11.14	11.71	11.56
TR1932_c0_g1	-	-	-	-	-	-	-	-	65.61	67.35	57.73	9.36	10.18	7.99	21.16	28.92	23.65	1.41	2.89	2.6
TR9690_c0_g1	PREDICTED: ferredoxin-like [Vitis vinifera]	Ferredoxin-1, chloroplastic OS=Solanum lycopersicum OX=4081 GN=SEND33 PE=2 SV=1	2Fe-2S iron-sulfur cluster binding domain	-	-	-	K02639|petF; ferredoxin	ko00195(Metabolism)	64.08	73.01	67.68	25.11	26.58	24.27	6.37	6.81	8.22	1.19	1.48	1.43
TR74324_c0_g2	-	-	-	-	-	-	-	-	61.94	69.53	59.41	16.5	27.57	19.78	50.43	52.3	61.02	12.24	19.18	15.66
TR120210_c0_g1	hypothetical protein A8B94_11150 [Bordetella pertussis]	-	-	-	-	-	-	-	60.46	43.47	373.23	19.64	9.05	14.46	54.06	26.68	101.73	10.85	12.93	10.94
TR12712_c0_g2	PREDICTED: cysteine proteinase inhibitor 1-like [Nelumbo nucifera]	Cysteine proteinase inhibitor 1 OS=Actinidia deliciosa OX=3627 PE=1 SV=1	Aspartic acid proteinase inhibitor;Cystatin domain	-	-	-	K13899|CST3; cystatin-C	ko04970(Organismal Systems)	58.98	46.53	46.41	6.83	8.31	7.91	36.1	33.08	38.97	87.43	71.69	84.5
TR3525_c2_g1	hypothetical protein AQUCO_02800213v1 [Aquilegia coerulea]	Cysteine proteinase inhibitor 5 OS=Arabidopsis thaliana OX=3702 GN=CYS5 PE=2 SV=2	-	-	-	-	-	-	58.5	58.12	69.18	26.45	24.11	22.52	335.69	374.24	372.66	44.06	47.28	45.54
TR5142_c0_g1	Glycine-rich RNA-binding protein GRP1A [Glycine soja]	Glycine-rich RNA-binding, abscisic acid-inducible protein OS=Zea mays OX=4577 GN=RAB15 PE=1 SV=1	-	-	-	-	-	-	58.35	65.4	70.2	33.25	31.82	25	9.81	10.23	14.6	3.71	4.57	2.32
TR11245_c0_g1	-	-	-	-	-	-	-	-	58.06	43.55	28.53	13.79	21.06	15.06	48.35	54.81	61.06	15.87	12.43	15.52
TR42026_c0_g1	hypothetical protein BMULJ_05097 [Burkholderia multivorans ATCC 17616]	-	-	-	-	-	-	-	57.68	34.97	198.08	9.44	9.51	14.91	46.7	14.97	87.75	13.51	0.84	3.72
TR4565_c0_g1	hypothetical protein AQUCO_08300033v1 [Aquilegia coerulea]	Gallate 1-beta-glucosyltransferase OS=Quercus robur OX=38942 GN=UGT84A13 PE=1 SV=1	UDP-glucoronosyl and UDP-glucosyl transferase	-	-	-	-	-	56.7	55.35	58.86	22.93	21.66	20.16	11	11.03	11.68	2.01	1.58	1.88
TR41148_c0_g1	PREDICTED: receptor-like protein 12 [Gossypium hirsutum]	-	Leucine rich repeat	-	-	-	-	-	56.33	60.29	54.87	10.69	10.35	12.11	33.93	36.23	34.84	8.84	5.82	4.67
TR33517_c0_g1	hypothetical protein VITISV_027379 [Vitis vinifera]	Alpha-amylase/subtilisin inhibitor OS=Oryza sativa subsp. japonica OX=39947 GN=RASI PE=1 SV=2	Trypsin and protease inhibitor	-	-	-	-	-	56.21	54.92	50.88	15.47	19.4	18.52	154.18	165.54	143.79	11.89	11.15	13
TR117307_c0_g1	Plant peroxidase [Macleaya cordata]	Peroxidase 42 OS=Arabidopsis thaliana OX=3702 GN=PER42 PE=1 SV=2	Peroxidase	-	-	-	K00430|E1.11.1.7; peroxidase [EC:1.11.1.7]	ko00940(Metabolism);ko01100(Metabolism);ko01110(Metabolism)	55.85	60.16	56.69	0.58	0.72	0.89	1.84	1.62	2.12	0.43	0.14	0.73
TR7858_c0_g1	PREDICTED: probable xyloglucan endotransglucosylase/hydrolase protein 27 [Nelumbo nucifera]	Probable xyloglucan endotransglucosylase/hydrolase protein 27 OS=Arabidopsis thaliana OX=3702 GN=XTH27 PE=2 SV=2	Glycosyl hydrolases family 16;Xyloglucan endo-transglycosylase (XET) C-terminus	-	-	-	-	-	54.87	56.4	56.44	2.65	2.4	2.48	4.43	5.74	6.03	30.91	30.02	28.22
TR3010_c0_g1	Bet v I domain [Macleaya cordata]	S-norcoclaurine synthase 2 OS=Papaver somniferum OX=3469 GN=NCS2 PE=1 SV=1	-	-	-	-	-	-	54.48	56.06	54.01	187.67	186.6	184.92	417.36	417.36	420.13	2164.06	2194.62	2167.17
TR73877_c1_g1	PREDICTED: pectinesterase-like [Eucalyptus grandis]	Pectinesterase/pectinesterase inhibitor OS=Ficus pumila var. awkeotsang OX=204231 PE=1 SV=1	-	-	-	-	-	-	53.2	48.59	55.65	9.45	14.41	21.93	53.73	64.55	64.81	133	140.67	147.38
TR6620_c0_g1	ripening-related protein [Siraitia grosvenorii]	Kiwellin OS=Actinidia deliciosa OX=3627 PE=1 SV=1	-	-	-	-	-	-	51.22	44.83	61.34	2398.87	1871.91	1984.75	30.41	61.39	61.37	876.4	1074.74	673.21
TR2102_c0_g1	Antimicrobial protein MiAMP1 [Macleaya cordata]	Antimicrobial peptide 1 OS=Macadamia integrifolia OX=60698 PE=1 SV=1	MiAMP1	-	-	-	-	-	49.55	53.45	49.09	227	223.53	226.01	1190.21	1239.18	1031.35	146.3	145.48	159.89
TR14711_c0_g1	-	-	-	-	-	-	-	-	49.16	62.59	73.33	13.94	12.87	13.89	79.85	83.39	113.26	26.35	31.18	21.93
TR2997_c1_g1	PREDICTED: pectinesterase 2-like [Nelumbo nucifera]	Pectinesterase 2 OS=Citrus sinensis OX=2711 GN=PECS-2.1 PE=2 SV=1	Pectinesterase	-	-	-	-	-	48.59	66.84	54.3	16.54	22.05	15.25	237.5	236.19	216.39	9.28	7.75	12.11
TR8661_c0_g1	-	-	-	-	-	-	-	-	47.45	42.2	47.13	5.29	7.05	5.15	81.62	86.83	79.44	3.2	1.69	2.87
TR11540_c0_g1	-	-	-	-	-	-	-	-	47.07	45.66	40.2	19.28	13.62	13.99	5.95	6.46	9.48	1.54	1.07	0.76
TR1674_c1_g1	Chain A, Miraculin-like protein from Vitis vinifera	Kunitz trypsin inhibitor 2 OS=Arabidopsis thaliana OX=3702 GN=KTI2 PE=2 SV=1	Trypsin and protease inhibitor	-	-	-	-	-	45.15	50	41.83	12.45	13.19	13.72	96.89	95.4	88.69	35.46	36.37	35.05
TR2457_c1_g1	hypothetical protein B296_00033442 [Ensete ventricosum]|RWW09594.1 hypothetical protein GW17_00026915 [Ensete ventricosum]|RWW89053.1 hypothetical protein BHE74_00002009 [Ensete ventricosum]|RZR72215.1 hypothetical protein BHM03_00011192 [Ensete ventricosum]	Heavy metal-associated isoprenylated plant protein 26 OS=Arabidopsis thaliana OX=3702 GN=HIPP26 PE=1 SV=1	Heavy-metal-associated domain	-	-	-	-	-	44.29	48.01	47.36	9.62	13.22	12.14	47.14	49.81	43.27	9.56	7.93	10.41
TR2217_c0_g1	PREDICTED: pathogenesis-related protein 1-like [Juglans regia]	Pathogenesis-related protein 1 OS=Arabidopsis thaliana OX=3702 GN=At2g14610 PE=1 SV=1	Cysteine-rich secretory protein family	-	-	-	K13449|PR1; pathogenesis-related protein 1	ko04016(Environmental Information Processing);ko04075(Environmental Information Processing);ko04626(Organismal Systems)	43.99	44.22	42.29	104.52	111.32	106.4	51.59	54.81	48.5	16.6	15.53	15.71
TR2987_c0_g2	-	-	-	-	-	-	-	-	43.94	43.37	43.13	92.47	84.71	82.89	307.69	361.9	313.23	141.44	153.26	130.85
TR7245_c0_g2	cytochrome P450 [Coptis japonica var. dissecta]	Cytochrome P450 81D11 OS=Arabidopsis thaliana OX=3702 GN=CYP81D11 PE=2 SV=1	Cytochrome P450	-	-	-	-	-	43.81	44.77	40.2	85.44	87.87	83.94	30.24	29.69	28.86	4.9	4.4	4.35
TR205964_c0_g1	serotransferrin precursor [Rattus norvegicus]|P12346.3 RecName: Full=Serotransferrin	-	Transferrin;ABC transporter, phosphonate, periplasmic substrate-binding protein	tissue homeostasis;biological_process;multicellular organismal process;homeostatic process;multicellular organismal homeostasis;anatomical structure homeostasis;biological regulation;regulation of biological quality;cell death;programmed cell death;cellular process;signal transduction;intracellular signal transduction;cell communication;signaling;regulation of biological process;regulation of cel…	nucleotide binding;nucleoside binding;purine nucleoside binding;molecular_function;binding;purine nucleotide binding;guanyl nucleotide binding;ribonucleoside binding;purine ribonucleoside binding;ribonucleotide binding;purine ribonucleotide binding;guanyl ribonucleotide binding;purine ribonucleoside triphosphate binding;small molecule binding;ion binding;anion binding;organic cyclic compound bind…	plasma membrane;intracellular;cellular_component;extrinsic component of membrane;membrane;extracellular region;extracellular space;cell;cytoplasm;endosome;external side of plasma membrane;cell surface;endomembrane system;basolateral plasma membrane;extrinsic component of plasma membrane;intrinsic component of membrane;cytoplasmic vesicle;vesicle;protein-containing complex;organelle;membrane-bound…	-	-	38.93	10.22	9.66	2.65	3.36	2.59	8.64	7.82	6.55	1.31	1.49	1.85
TR1089_c3_g1	PREDICTED: caffeic acid 3-O-methyltransferase 1 [Nelumbo nucifera]	Caffeic acid 3-O-methyltransferase 1 OS=Populus tremuloides OX=3693 GN=OMT1 PE=1 SV=1	O-methyltransferase;Dimerisation domain	-	-	-	K13066|COMT; caffeic acid 3-O-methyltransferase / acetylserotonin O-methyltransferase [EC:2.1.1.68 2.1.1.4]	ko00380(Metabolism);ko00940(Metabolism);ko01100(Metabolism);ko01110(Metabolism)	38.84	40.87	42.21	15.56	15.87	15.82	37.7	40.29	36.9	17.82	16.6	15.93
TR64103_c0_g1	-	-	-	-	-	-	-	-	38.16	39.43	34.29	179.61	167.39	157.85	73.27	71.66	96.07	37.56	32.49	33.4
TR485_c0_g1	Cytochrome P450 84A1 like [Actinidia chinensis var. chinensis]	Cytochrome P450 84A1 OS=Arabidopsis thaliana OX=3702 GN=CYP84A1 PE=1 SV=1	Cytochrome P450;Cytochrome P450	-	-	-	K09755|CYP84A, F5H; ferulate-5-hydroxylase [EC:1.14.-.-]	ko00940(Metabolism);ko01100(Metabolism);ko01110(Metabolism)	37.64	41.08	41.33	80.33	78.88	81.88	498.64	501.22	478.54	1138.3	1104.59	1154.33
TR1940_c1_g2	-	-	-	-	-	-	-	-	35.65	36.44	36.19	4.77	5.05	5.52	13.39	16.75	15.59	2.74	3.27	3
TR4343_c0_g1	photosynthetic NDH subunit of subcomplex B 4, chloroplastic [Camellia sinensis]	Photosynthetic NDH subunit of subcomplex B 4, chloroplastic OS=Arabidopsis thaliana OX=3702 GN=PNSB4 PE=2 SV=1	-	-	-	-	-	-	35.36	37.1	35.89	14.37	10.82	14.07	5.66	7.46	6.86	2.73	2.34	2.74
TR210928_c0_g1	transthyretin precursor [Rattus norvegicus]|XP_006254519.1 PREDICTED: transthyretin isoform X1 [Rattus norvegicus]|P02767.1 RecName: Full=Transthyretin	-	HIUase/Transthyretin family	metabolic process;nucleobase-containing compound metabolic process;cellular aromatic compound metabolic process;nitrogen compound metabolic process;biological_process;nucleobase metabolic process;cellular process;cellular nitrogen compound metabolic process;cellular metabolic process;primary metabolic process;small molecule metabolic process;heterocycle metabolic process;nucleobase-containing sma…	protein binding;molecular_function;signaling receptor binding;binding;molecular function regulator;receptor ligand activity;receptor regulator activity;protein dimerization activity;hormone binding;thyroid hormone binding;identical protein binding;protein heterodimerization activity;hormone activity	cellular_component;extracellular region;extracellular space;vesicle;organelle;membrane-bounded organelle;extracellular organelle;extracellular region part;extracellular vesicle;extracellular exosome	K07127|uraH, pucM, hiuH; 5-hydroxyisourate hydrolase [EC:3.5.2.17]	ko00230(Metabolism);ko01100(Metabolism);ko01120(Metabolism)	34.67	9.87	10.15	1.55	3.21	1.8	8.69	6.39	5.41	1.91	1.14	1.76
TR4755_c0_g1	Oxidoreductase [Macleaya cordata]	Uncharacterized oxidoreductase At4g09670 OS=Arabidopsis thaliana OX=3702 GN=At4g09670 PE=1 SV=1	Oxidoreductase family, NAD-binding Rossmann fold;Oxidoreductase family, NAD-binding Rossmann fold	-	-	-	-	-	33.57	34.68	35.56	65.13	66.33	65.38	30.84	32.44	31.5	71.85	69.53	69.18
TR12167_c0_g1	-	-	-	-	-	-	-	-	32.08	28.64	31.59	6.23	7.51	6.62	14.71	13.53	19.27	2.9	3.44	2.56
TR1282_c0_g1	protein inturned [Felis catus]	-	-	-	-	-	-	-	31.92	10.84	10.91	2.48	2.29	3.31	9.97	4.81	3.9	2.62	1.37	0.9
TR22554_c0_g1	apolipoprotein E [Rattus sp.]	-	Apolipoprotein A1/A4/E domain;Bacterial protein of unknown function (DUF883)	endothelial cell proliferation;regulation of endothelial cell proliferation;biological_process;cell proliferation;negative regulation of cell proliferation;cellular process;regulation of cell proliferation;negative regulation of biological process;negative regulation of cellular process;epithelial cell proliferation;regulation of epithelial cell proliferation;negative regulation of epithelial cel…	molecular_function;binding;amide binding;peptide binding;lipid binding;ion binding;anion binding;protein-containing complex binding;protein-lipid complex binding;glycosaminoglycan binding;carbohydrate derivative binding;sulfur compound binding;steroid binding;sterol binding;small molecule binding;alcohol binding;organic cyclic compound binding;transporter activity;lipid transporter activity;stero…	plasma membrane;intracellular;cellular_component;extrinsic component of membrane;lytic vacuole;membrane;vacuole;extracellular region;extracellular space;cell;nucleus;cytoplasm;endosome;intracellular membrane-bounded organelle;cytoskeleton;external side of plasma membrane;cell surface;endomembrane system;microtubule cytoskeleton;neuron projection;extrinsic component of plasma membrane;cytoplasmic …	-	-	31.07	7.39	12.05	1.64	2.15	1.89	5.84	5.27	4.18	1.46	1.13	1.34
TR39050_c0_g1	PREDICTED: late embryogenesis abundant protein At1g64065 [Theobroma cacao]	-	Late embryogenesis abundant protein	-	-	-	-	-	30.97	35.04	35.08	14.53	13.67	14	42.94	46.36	45.24	2.28	1.52	1.48
TR3417_c2_g1	hypothetical protein BVC80_1787g160 [Macleaya cordata]	Low-temperature-induced 65 kDa protein OS=Arabidopsis thaliana OX=3702 GN=LTI65 PE=2 SV=2	CAP160 repeat	-	-	-	-	-	30.68	27.98	27.79	12.11	12.66	13.05	33.9	34.12	36.77	75.87	83.08	73.51
TR1219_c2_g1	Peptidase A1 [Macleaya cordata]	Aspartic proteinase CDR1 OS=Arabidopsis thaliana OX=3702 GN=CDR1 PE=1 SV=1	Xylanase inhibitor N-terminal;Xylanase inhibitor C-terminal;Eukaryotic aspartyl protease	-	-	-	-	-	30.24	27.98	29.16	5.86	6.16	6.21	36.26	34.58	36.64	14.9	11.69	14.2
TR24793_c3_g1	-	-	-	-	-	-	-	-	29.84	38.25	12.21	2.08	5.33	0	63.97	69.46	68.37	7.73	3.54	9.61
TR5939_c0_g1	PREDICTED: glycine cleavage system H protein, mitochondrial [Nelumbo nucifera]	Glycine cleavage system H protein, mitochondrial OS=Flaveria anomala OX=35877 GN=GDCSH PE=2 SV=1	Glycine cleavage H-protein	-	-	-	K02437|gcvH, GCSH; glycine cleavage system H protein	ko00260(Metabolism);ko00630(Metabolism);ko01100(Metabolism);ko01110(Metabolism);ko01200(Metabolism)	29.76	26.84	32.85	13.45	13.58	14.1	2.91	2.74	3.16	0.37	0.88	0.83
TR8085_c0_g1	-	-	-	-	-	-	-	-	29.57	31.03	20.91	6.96	10.82	14.15	55.35	55.02	53.65	6.64	6.77	10.89
TR6881_c0_g1	GRAM domain containing protein [Parasponia andersonii]	GEM-like protein 5 OS=Arabidopsis thaliana OX=3702 GN=At5g13200 PE=1 SV=1	GRAM domain	-	-	-	-	-	28.42	20	25.61	82.6	91.92	79.75	26.74	26.3	30.09	3.83	5.19	3.55
TR17490_c0_g1	-	-	-	-	-	-	-	-	28	24.69	27.09	174.91	221.13	190.6	79.14	80.5	82.58	477.27	481.65	513.78
TR1528_c0_g1	hsp70 nucleotide exchange factor fes1 [Quercus suber]	-	-	-	-	-	-	-	27.54	30.04	28.45	4.67	4.4	5.15	2.56	2.31	2.63	5.75	5.42	5.29
TR8625_c0_g1	hypothetical protein AQUCO_00500387v1 [Aquilegia coerulea]	(3S,6E)-nerolidol synthase 1 OS=Fragaria ananassa OX=3747 PE=1 SV=1	Terpene synthase family, metal binding domain;Terpene synthase, N-terminal domain;Terpene synthase, N-terminal domain	-	-	-	K15086|TPS14; (3S)-linalool synthase [EC:4.2.3.25]	ko00902(Metabolism);ko01110(Metabolism)	27.46	27.42	31.75	0.41	0.29	0.76	1.13	1.33	1.47	0.37	0.41	0.34
TR20490_c0_g1	-	-	-	-	-	-	-	-	27.45	29.79	26.49	9	9.96	8.64	31.69	30.37	33.55	8.71	9.08	9.15
TR3598_c0_g1	Uncharacterized protein family UPF0114 [Macleaya cordata]	-	Uncharacterized protein family, UPF0114	-	-	-	-	-	27.35	27.65	29.93	5.81	7.13	6.98	14.11	14.79	16.27	3.65	2.82	2.91
TR6088_c0_g2	PREDICTED: protein SRG1 [Eucalyptus grandis]|KCW88123.1 hypothetical protein EUGRSUZ_A00518 [Eucalyptus grandis]	Probable 2-oxoglutarate-dependent dioxygenase At3g111800 OS=Arabidopsis thaliana OX=3702 GN=At3g11180 PE=2 SV=1	non-haem dioxygenase in morphine synthesis N-terminal;2OG-Fe(II) oxygenase superfamily	-	-	-	-	-	27.28	29.33	29.8	6.91	8.43	10.28	16.66	21.7	17.69	36.09	35.19	36.68
TR870_c0_g1	Enolase [Macleaya cordata]	Enolase OS=Ricinus communis OX=3988 PE=2 SV=1	Enolase, C-terminal TIM barrel domain;Enolase, N-terminal domain	-	-	-	K01689|ENO, eno; enolase [EC:4.2.1.11]	ko00010(Metabolism);ko00680(Metabolism);ko01100(Metabolism);ko01110(Metabolism);ko01120(Metabolism);ko01200(Metabolism);ko01230(Metabolism);ko03018(Genetic Information Processing);ko04066(Environmental Information Processing)	26.67	25.8	27.89	3.35	2.95	2.79	8.47	7.25	7.5	2.15	1.68	1.47
TR2561_c2_g1	Glycoside hydrolase [Macleaya cordata]	Xyloglucan endotransglucosylase/hydrolase protein 31 OS=Arabidopsis thaliana OX=3702 GN=XTH31 PE=1 SV=2	-	-	-	-	-	-	26.2	25.64	25.5	65.91	66.56	65.97	211.12	212.51	206.15	1265.58	1238.82	1288.47
TR145548_c0_g1	fatty acid-binding protein, liver [Rattus norvegicus]|P02692.1 RecName: Full=Fatty acid-binding protein, liver	-	Lipocalin / cytosolic fatty-acid binding protein family;Lipocalin / cytosolic fatty-acid binding protein family	immune effector process;immune system process;regulation of immune system process;regulation of immune effector process;regulation of response to biotic stimulus;defense response;response to virus;response to stress;biological_process;response to external stimulus;response to biotic stimulus;response to other organism;regulation of defense response;regulation of response to external stimulus;resp…	molecular_function;transporter activity;lipid transporter activity;binding;lipid binding;carboxylic acid binding;monocarboxylic acid binding;small molecule binding;ion binding;anion binding;organic acid binding;phospholipid transporter activity;lysophospholipid transporter activity;protein binding;long-chain fatty acid transporter activity;drug binding;phospholipid binding;antioxidant activity;bi…	intracellular;cellular_component;extracellular region;peroxisome;extracellular space;cell;nucleus;cytoplasm;peroxisomal part;intracellular membrane-bounded organelle;cell cortex;microbody lumen;membrane-enclosed lumen;nuclear lumen;vesicle;microbody;organelle;membrane-bounded organelle;intracellular organelle;extracellular organelle;organelle lumen;extracellular region part;organelle part;intrace…	-	-	26.19	7.14	5.75	1.44	1.54	1.75	4.12	5.54	5.96	0.72	0.6	0.9
TR29840_c1_g1	RecName: Full=Alpha-2-HS-glycoprotein	-	Cystatin domain	acute inflammatory response;defense response;response to stress;inflammatory response;biological_process;response to stimulus;reproduction;developmental process involved in reproduction;multicellular organism development;sex differentiation;gonad development;reproductive process;multicellular organismal process;developmental process;development of primary sexual characteristics;development of pri…	molecular_function;enzyme inhibitor activity;endopeptidase inhibitor activity;endopeptidase regulator activity;molecular function regulator;peptidase inhibitor activity;enzyme regulator activity;peptidase regulator activity;protein kinase inhibitor activity;protein kinase regulator activity;kinase regulator activity;kinase inhibitor activity;protein tyrosine kinase inhibitor activity;receptor sig…	cellular_component;membrane;extracellular region;extracellular space;intrinsic component of membrane;vesicle;organelle;membrane-bounded organelle;extracellular organelle;extracellular region part;membrane part;extracellular vesicle;blood microparticle;integral component of membrane;extracellular exosome;extracellular matrix	-	-	25.94	9.1	8.44	2.98	2.82	3.85	8.43	6.86	5.12	2.22	1.39	1.57
TR4866_c0_g1	Tyrosinase [Macleaya cordata]	Polyphenol oxidase, chloroplastic OS=Vitis vinifera OX=29760 PE=1 SV=1	Protein of unknown function (DUF_B2219);Common central domain of tyrosinase;Polyphenol oxidase middle domain	-	-	-	K00422|E1.10.3.1; polyphenol oxidase [EC:1.10.3.1]	ko00350(Metabolism);ko00950(Metabolism);ko01100(Metabolism);ko01110(Metabolism)	25.05	26.1	25.95	3.23	2.58	3.35	0.79	0.59	0.77	4.85	5.69	5.39
TR3151_c0_g4	PREDICTED: tyrosine/DOPA decarboxylase 2-like [Nelumbo nucifera]	Tyrosine/DOPA decarboxylase 2 OS=Papaver somniferum OX=3469 GN=TYDC2 PE=2 SV=1	Pyridoxal-dependent decarboxylase conserved domain	-	-	-	K01592|TYDC; tyrosine decarboxylase [EC:4.1.1.25]	ko00350(Metabolism);ko00950(Metabolism);ko01100(Metabolism);ko01110(Metabolism)	24.23	25.84	25.05	6.83	7.86	8	29.3	30.09	25.16	1.73	1.4	1.38
TR13140_c1_g1	beta-amylase 1, chloroplastic-like [Glycine soja]|RZB62111.1 Beta-amylase 1, chloroplastic [Glycine soja]	Beta-amylase 1, chloroplastic OS=Arabidopsis thaliana OX=3702 GN=BAM1 PE=1 SV=1	Glycosyl hydrolase family 14	-	-	-	-	-	23.98	28.15	25.42	103.15	97.64	102.5	359.41	368.75	311.23	742.92	729.99	740.71
TR7449_c0_g1	-	-	-	-	-	-	-	-	23.2	23.29	20.32	5.41	6.73	5.73	18.25	20.59	20.5	6.25	8.25	6.87
TR192321_c1_g1	haptoglobin precursor [Rattus norvegicus]|P06866.3 RecName: Full=Haptoglobin	-	Trypsin	biological_process;acute inflammatory response;defense response;response to stress;inflammatory response;response to stimulus;response to external stimulus;response to biotic stimulus;response to other organism;response to bacterium;response to external biotic stimulus;multi-organism process;defense response to other organism;metabolic process;nitrogen compound metabolic process;protein metabolic…	molecular_function;catalytic activity;endopeptidase activity;serine-type peptidase activity;peptidase activity;peptidase activity, acting on L-amino acid peptides;hydrolase activity;serine hydrolase activity;catalytic activity, acting on a protein;protein binding;binding;antioxidant activity;serine-type endopeptidase activity;hemoglobin binding	cellular_component;extracellular region;extracellular region part;extracellular space	-	-	23.05	7.48	6.2	2.15	1.52	1.96	4.16	4.75	4.06	1	0.99	1.19
TR31135_c0_g1	alpha-1-antiproteinase precursor [Rattus norvegicus]|XP_006240518.1 PREDICTED: alpha-1-antiproteinase isoform X1 [Rattus norvegicus]|XP_017449521.1 PREDICTED: alpha-1-antiproteinase isoform X1 [Rattus norvegicus]|AAH78824.1 Serpin peptidase inhibitor, clade A (alpha-1 antiproteinase, antitrypsin), member 1 [Rattus norvegicus]|EDL81788.1 rCG20666 [Rattus norvegicus]	Serpin-Z2A OS=Oryza sativa subsp. japonica OX=39947 GN=Os11g0239000 PE=3 SV=1	Serpin (serine protease inhibitor)	response to stress;biological_process;response to abiotic stimulus;response to decreased oxygen levels;response to stimulus;response to oxygen levels;acute inflammatory response;defense response;inflammatory response;response to metal ion;response to inorganic substance;response to chemical;response to oxygen-containing compound;response to endogenous stimulus;response to hormone;response to orga…	protein binding;molecular_function;binding;enzyme binding;enzyme inhibitor activity;endopeptidase inhibitor activity;endopeptidase regulator activity;molecular function regulator;peptidase inhibitor activity;enzyme regulator activity;peptidase regulator activity;serine-type endopeptidase inhibitor activity;identical protein binding;protease binding	intracellular;cellular_component;extracellular region;extracellular space;cell;cytoplasm;intracellular membrane-bounded organelle;endomembrane system;vesicle;organelle;membrane-bounded organelle;intracellular organelle;extracellular organelle;extracellular region part;intracellular part;cytoplasmic part;cell part;extracellular vesicle;extracellular exosome;Golgi apparatus;endoplasmic reticulum	-	-	22.85	5.77	4.73	1.51	1.95	1.6	5.25	4.56	4.1	1.02	0.8	0.76
TR4642_c0_g1	PREDICTED: receptor-like protein 12 [Vitis vinifera]	Receptor-like protein 30 OS=Arabidopsis thaliana OX=3702 GN=RLP30 PE=2 SV=1	Leucine rich repeat;Leucine Rich repeats (2 copies);Leucine Rich Repeat	-	-	-	-	-	22.1	24.08	26.3	6.64	6.83	5.5	19.26	19.66	17.85	4.93	5.36	4.24
TR1108_c4_g1	D-galactoside/L-rhamnose binding SUEL lectin domain [Macleaya cordata]	Beta-galactosidase OS=Solanum lycopersicum OX=4081 PE=1 SV=1	Glycosyl hydrolases family 35;Beta-galactosidase;Galactose binding lectin domain	-	-	-	-	-	21.71	24.48	23.97	45.86	45.31	45.94	171.3	166.41	164.73	509.91	493.67	504.08
TR14082_c0_g1	hypothetical protein AQUCO_00900064v1 [Aquilegia coerulea]	WAT1-related protein At5g07050 OS=Arabidopsis thaliana OX=3702 GN=At5g07050 PE=2 SV=1	EamA-like transporter family	-	-	-	-	-	21.66	19.63	22.2	5.66	5.85	5.65	21.81	23.21	22.04	8.91	8.39	8.53
TR28780_c1_g1	hypothetical protein AQUCO_02700291v1 [Aquilegia coerulea]	Cation/H(+) antiporter 20 OS=Arabidopsis thaliana OX=3702 GN=CHX20 PE=2 SV=1	-	-	-	-	-	-	20.95	32.19	34.88	4.16	2.56	6.33	22.18	31.95	36.74	233.01	217.08	259.92
TR7430_c0_g1	NADH dehydrogenase subunit 4 (mitochondrion) [Rattus norvegicus]|P05508.3 RecName: Full=NADH-ubiquinone oxidoreductase chain 4	NADH-ubiquinone oxidoreductase chain 4 OS=Prototheca wickerhamii OX=3111 GN=ND4 PE=3 SV=1	-	metabolic process;generation of precursor metabolites and energy;oxidation-reduction process;respiratory electron transport chain;oxidative phosphorylation;electron transport chain;nucleobase-containing compound metabolic process;purine nucleotide metabolic process;cellular aromatic compound metabolic process;nucleoside phosphate metabolic process;phosphorus metabolic process;phosphate-containing…	molecular_function;catalytic activity;NADH dehydrogenase activity;oxidoreductase activity;oxidoreductase activity, acting on NAD(P)H;oxidoreductase activity, acting on NAD(P)H, quinone or similar compound as acceptor;NADH dehydrogenase (quinone) activity;NADH dehydrogenase (ubiquinone) activity	cellular_component;membrane;intrinsic component of membrane;membrane part;integral component of membrane	K03881|ND4; NADH-ubiquinone oxidoreductase chain 4 [EC:7.1.1.2]	ko00190(Metabolism);ko01100(Metabolism);ko04714(Organismal Systems);ko04723(Organismal Systems)	20.95	6.6	7.88	1.7	2.22	2.88	5.62	5.81	6.61	1.83	1.34	1.11
TR12756_c0_g1	hypothetical protein AQUCO_00600314v1 [Aquilegia coerulea]	Proline dehydrogenase 1, mitochondrial OS=Arabidopsis thaliana OX=3702 GN=POX1 PE=1 SV=2	Proline dehydrogenase	-	-	-	K00318|PRODH, fadM, putB; proline dehydrogenase [EC:1.5.5.2]	ko00330(Metabolism);ko01100(Metabolism);ko01110(Metabolism)	20.79	22.63	23.54	7.49	7.97	7.93	18.88	18.86	20.4	7.14	6.28	7.36
TR2538_c0_g1	Monooxygenase [Macleaya cordata]	-	-	-	-	-	-	-	20.15	21.09	21.24	4.86	4.98	4.55	16.58	16.08	16.68	32.46	32.9	39.7
TR66543_c0_g1	hypothetical protein PROSTU_00109 [Providencia stuartii ATCC 25827]	-	-	-	-	-	-	-	19.64	31.24	20.99	7.46	7.23	7.46	23.34	24.02	16.21	6.02	5	3.98
TR9053_c0_g1	-	-	-	-	-	-	-	-	19.59	16.43	18.5	1.4	4.1	1.22	6.96	8.1	16.45	0.5	1.84	0.99
TR9817_c0_g1	glucan endo-1,3-beta-glucosidase 11 [Carica papaya]	Glucan endo-1,3-beta-glucosidase 10 OS=Arabidopsis thaliana OX=3702 GN=At5g42100 PE=2 SV=1	-	-	-	-	-	-	19.35	19.38	17.17	46.8	49.45	43.91	13.98	14.87	17.59	3.33	4.15	4.82
TR2345_c0_g1	late embryogenesis abundant protein At1g64065-like [Herrania umbratica]	-	Late embryogenesis abundant protein	-	-	-	-	-	19.27	20.01	22.02	82.58	85.09	87.08	29.16	29.77	31.44	59.66	57.98	60.2
TR11751_c0_g1	hypothetical protein AQUCO_03500197v1 [Aquilegia coerulea]	Peroxidase 47 OS=Arabidopsis thaliana OX=3702 GN=PER47 PE=2 SV=2	Peroxidase	-	-	-	K00430|E1.11.1.7; peroxidase [EC:1.11.1.7]	ko00940(Metabolism);ko01100(Metabolism);ko01110(Metabolism)	18.95	17.23	15.79	6.77	8.2	8.04	3.92	3.46	4.12	1.08	1.46	1.39
TR996_c2_g1	-	-	-	-	-	-	-	-	18.95	13.86	11.26	4.14	4.65	5.52	22.39	22.53	28	6.71	6.22	7.35
TR412_c1_g1	-	-	-	-	-	-	-	-	18.71	21.34	21.81	2.21	2.13	2.47	7.41	8.41	9.33	36.34	36.01	38.42
TR5251_c1_g1	PREDICTED: cytochrome P450 2C7 isoform X1 [Rattus norvegicus]	Cytochrome P450 83A1 OS=Arabidopsis thaliana OX=3702 GN=CYP83A1 PE=1 SV=2	Cytochrome P450	metabolic process;biological_process;response to external stimulus;response to extracellular stimulus;response to nutrient levels;response to chemical;response to stimulus;response to organic substance;long-chain fatty acid metabolic process;organic acid metabolic process;lipid metabolic process;fatty acid metabolic process;icosanoid metabolic process;cellular process;arachidonic acid metabolic p…	molecular_function;binding;metal ion binding;ion binding;cation binding;transition metal ion binding;catalytic activity;monooxygenase activity;oxidoreductase activity;arachidonic acid monooxygenase activity;oxidoreductase activity, acting on paired donors, with incorporation or reduction of molecular oxygen;tetrapyrrole binding;cofactor binding;organic cyclic compound binding;heterocyclic compoun…	intracellular;cellular_component;membrane;cell;cytoplasm;endoplasmic reticulum;intracellular membrane-bounded organelle;endomembrane system;organelle subcompartment;nuclear outer membrane-endoplasmic reticulum membrane network;organelle;membrane-bounded organelle;intracellular organelle;organelle part;intracellular part;membrane part;endoplasmic reticulum part;cytoplasmic part;intracellular organ…	-	-	18.51	2.41	2.2	0.57	0.46	0.46	1.61	1.57	1.92	0.25	0.18	0.33
TR11221_c0_g1	Leucine-rich repeat [Macleaya cordata]	-	-	-	-	-	-	-	18.37	18.83	26.23	2.29	1.39	0.53	9.82	8.57	9.46	1.86	2.34	3
TR12210_c3_g2	PREDICTED: amino acid transporter ANTL1-like isoform X1 [Nelumbo nucifera]	Amino acid transporter AVT1I OS=Arabidopsis thaliana OX=3702 GN=AVT1I PE=3 SV=1	Transmembrane amino acid transporter protein;Transmembrane amino acid transporter protein	-	-	-	K15015|SLC32A, VGAT; solute carrier family 32 (vesicular inhibitory amino acid transporter)	ko04721(Organismal Systems);ko04723(Organismal Systems);ko04727(Organismal Systems)	17.63	18.1	18.62	0.69	0.84	0.61	1.46	1.46	1.87	0.13	0.1	0.28
TR4725_c1_g1	-	-	-	-	-	-	-	-	17.47	16.29	18.57	3.43	4.23	3.08	10.54	15.41	15.63	3.65	3.63	4.74
TR15117_c0_g2	pre-mRNA-processing protein 40C isoform X1 [Cynara cardunculus var. scolymus]	Pre-mRNA-processing protein 40C OS=Arabidopsis thaliana OX=3702 GN=MED35C PE=1 SV=1	-	-	-	-	-	-	16.9	19.2	14.87	4.54	4.15	2.88	12.11	8.42	12.25	1.37	2.64	2.43
TR288_c4_g1	hypothetical protein AQUCO_03200069v1 [Aquilegia coerulea]	Miraculin OS=Synsepalum dulcificum OX=3743 PE=1 SV=3	Trypsin and protease inhibitor	-	-	-	-	-	16.7	17.27	14.45	7.22	6.83	7.15	43.89	45.34	41.54	4.61	4.55	5
TR3633_c0_g1	NADH dehydrogenase subunit 2 (mitochondrion) [Rattus nitidus]|AOW70459.1 NADH dehydrogenase subunit 2 (mitochondrion) [Rattus nitidus]	NAD(P)H-quinone oxidoreductase subunit 2, chloroplastic OS=Marchantia polymorpha OX=3197 GN=ndhB PE=3 SV=1	-	-	-	-	-	-	16.55	4.26	5.81	0.79	1.18	1.56	3	4.18	3.01	0.81	0.72	0.63
TR3850_c0_g1	hypothetical protein AQUCO_00700789v1 [Aquilegia coerulea]	-	-	-	-	-	-	-	16.08	15.13	16.04	5.19	4.83	4.26	1.46	1.48	2.15	2.99	2.9	3.27
TR3827_c0_g1	PREDICTED: MDIS1-interacting receptor like kinase 2 isoform X1 [Vitis vinifera]	-	Leucine rich repeat N-terminal domain;Leucine rich repeat;Leucine Rich repeats (2 copies)	-	-	-	-	-	15.96	17.78	12.23	7.2	2.74	5.8	15.39	18.02	13.1	5.96	4.76	5.55
TR1078_c1_g1	hypothetical protein CK203_020324 [Vitis vinifera]	-	Phosphatidylinositol-specific phospholipase C, X domain	-	-	-	-	-	15.95	18.76	18.22	49.26	49.06	50.06	118.23	117.69	107.05	301.18	288.97	313.93
TR11733_c0_g2	PREDICTED: cysteine proteinase inhibitor 4-like [Nelumbo nucifera]	Cysteine proteinase inhibitor 5 OS=Oryza sativa subsp. japonica OX=39947 GN=Os01g0915401 PE=3 SV=2	Aspartic acid proteinase inhibitor;Cystatin domain	-	-	-	K13899|CST3; cystatin-C	ko04970(Organismal Systems)	15.65	12.88	14.82	6.69	6.5	7.06	25.07	25.94	32.72	5.18	3.93	3.73
TR206176_c0_g1	vitamin D-binding protein precursor [Rattus norvegicus]|AAH78891.1 Group specific component [Rattus norvegicus]|EDL88538.1 group specific component, isoform CRA_b [Rattus norvegicus]	-	Serum albumin family;Vitamin D binding protein, domain III	reproduction;biological_process;reproductive process;multicellular organismal process;multi-organism reproductive process;multi-multicellular organism process;multi-organism process;secretion;transport;multicellular organism development;body fluid secretion;mammary gland development;developmental process;animal organ development;system development;gland development;anatomical structure developmen…	protein binding;molecular_function;binding;cytoskeletal protein binding;steroid binding;vitamin D binding;lipid binding;drug binding;vitamin binding;small molecule binding;organic cyclic compound binding;D3 vitamins binding;calcidiol binding;actin binding	intracellular;cellular_component;extracellular region;extracellular space;cell;cytoplasm;neuron projection;vesicle;cell projection;organelle;membrane-bounded organelle;extracellular organelle;extracellular region part;intracellular part;cytoplasmic part;cell part;neuron part;plasma membrane bounded cell projection;extracellular vesicle;cytosol;axon;extracellular exosome;perinuclear region of cyto…	-	-	15.53	3.87	3.28	0.71	0.97	0.86	2.71	2.39	2.44	0.49	0.34	0.62
TR2636_c2_g1	Late embryogenesis abundant protein [Macleaya cordata]	NDR1/HIN1-like protein 1 OS=Arabidopsis thaliana OX=3702 GN=NHL1 PE=2 SV=1	-	-	-	-	-	-	15.26	15.46	15.22	5.52	4.72	4.24	9.98	11.65	9.66	3.69	3.38	3.66
TR115773_c0_g2	-	26S proteasome regulatory subunit 6A homolog OS=Oryza sativa subsp. japonica OX=39947 GN=TBP1 PE=2 SV=2	-	-	-	-	-	-	15	14.02	14.3	31.26	38.36	33	9.67	7.98	8.61	18.66	19.15	17.81
TR6504_c0_g1	hypothetical protein DVH24_002005 [Malus domestica]	Probable pectate lyase 15 OS=Arabidopsis thaliana OX=3702 GN=At4g13710 PE=2 SV=1	-	-	-	-	-	-	13.88	15.06	13.82	27.1	27.84	29.4	95.29	95.43	98.18	361.63	370.71	375.71
TR361_c0_g4	cytochrome b	Cytochrome b OS=Marchantia polymorpha OX=3197 GN=MT-CYB PE=3 SV=2	-	metabolic process;generation of precursor metabolites and energy;oxidation-reduction process;respiratory electron transport chain;oxidative phosphorylation;electron transport chain;nucleobase-containing compound metabolic process;purine nucleotide metabolic process;cellular aromatic compound metabolic process;nucleoside phosphate metabolic process;phosphorus metabolic process;phosphate-containing…	molecular_function;catalytic activity;NADH dehydrogenase activity;oxidoreductase activity;oxidoreductase activity, acting on NAD(P)H;oxidoreductase activity, acting on NAD(P)H, quinone or similar compound as acceptor;NADH dehydrogenase (quinone) activity;NADH dehydrogenase (ubiquinone) activity	cellular_component;membrane;intrinsic component of membrane;membrane part;integral component of membrane	K00412|CYTB, petB; ubiquinol-cytochrome c reductase cytochrome b subunit	ko00190(Metabolism);ko01100(Metabolism);ko02020(Environmental Information Processing);ko04260(Organismal Systems);ko04714(Organismal Systems)	13.76	5.08	6.24	1.45	1.7	1.57	3.98	3.96	3.98	1.16	0.8	1.01
TR27531_c0_g1	oxalate--CoA ligase [Jatropha curcas]|KDP22274.1 hypothetical protein JCGZ_26105 [Jatropha curcas]	Oxalate--CoA ligase OS=Arabidopsis thaliana OX=3702 GN=AAE3 PE=1 SV=1	AMP-binding enzyme	-	-	-	-	-	13.63	18.61	10.76	208.3	207.72	202.16	66.08	78.51	74.82	329.26	339.02	330.21
TR36077_c0_g1	thioredoxin-interacting protein [Macaca mulatta]|XP_003892575.1 thioredoxin-interacting protein [Papio anubis]|XP_005542140.1 PREDICTED: thioredoxin-interacting protein [Macaca fascicularis]|XP_007975472.1 PREDICTED: thioredoxin-interacting protein [Chlorocebus sabaeus]|XP_011850545.1 PREDICTED: thioredoxin-interacting protein isoform X2 [Mandrillus leucophaeus]|XP_011930816.1 PREDICTED: thioredo…	-	Arrestin (or S-antigen), N-terminal domain;Arrestin (or S-antigen), C-terminal domain	metabolic process;transcription by RNA polymerase II;nucleobase-containing compound metabolic process;transcription, DNA-templated;regulation of transcription, DNA-templated;regulation of transcription by RNA polymerase II;cellular aromatic compound metabolic process;nitrogen compound metabolic process;biological_process;biosynthetic process;macromolecule biosynthetic process;regulation of biosyn…	molecular_function;molecular function regulator;enzyme regulator activity;protein binding;binding;enzyme binding;ubiquitin-like protein ligase binding;ubiquitin protein ligase binding;enzyme inhibitor activity	intracellular;cellular_component;cell;intracellular part;cell part;cytoplasm	-	-	13.55	3.21	3.6	0.42	0.83	0.63	2.42	1.58	1.03	0.4	0.16	0.46
TR3554_c1_g1	PREDICTED: UPF0496 protein At1g20180-like [Nelumbo nucifera]	UPF0496 protein At1g20180 OS=Arabidopsis thaliana OX=3702 GN=At1g20180 PE=2 SV=2	Protein of unknown function (DUF677)	-	-	-	-	-	13.44	12.69	11.59	29.3	26.97	27.46	211.01	207.51	209.13	83.91	84.27	82.58
TR29657_c0_g1	retinol-binding protein 4 isoform 1 [Mus musculus]	-	Lipocalin / cytosolic fatty-acid binding protein family;Lipocalin-like domain	metabolic process;carbohydrate metabolic process;monosaccharide metabolic process;glucose metabolic process;biological_process;biosynthetic process;carbohydrate biosynthetic process;hexose metabolic process;hexose biosynthetic process;primary metabolic process;small molecule metabolic process;small molecule biosynthetic process;monosaccharide biosynthetic process;organic substance metabolic proce…	molecular_function;binding;retinoid binding;lipid binding;isoprenoid binding;vitamin binding;small molecule binding;alcohol binding;transporter activity;transmembrane transporter activity;lipid transporter activity;vitamin transmembrane transporter activity;inorganic molecular entity transmembrane transporter activity;alcohol transmembrane transporter activity;organic hydroxy compound transmembra…	cellular_component;extracellular region;extracellular space;vesicle;organelle;membrane-bounded organelle;extracellular organelle;extracellular region part;extracellular vesicle;extracellular exosome	-	-	13.42	3.99	3.68	1.08	1.41	1.37	4.01	3.98	2.64	0.81	0.47	1.17
TR18533_c0_g1	-	-	-	-	-	-	-	-	13.39	12.04	10.44	3.65	3.56	3.5	16.96	15.35	22.53	0.87	2.39	1.29
TR5069_c1_g1	PREDICTED: uncharacterized protein LOC104610606 [Nelumbo nucifera]	-	Protein of unknown function (DUF1645)	-	-	-	-	-	13.21	13.26	14.26	5.24	4.9	5.3	2.14	2.16	2.06	0.38	0.53	0.48
TR5253_c3_g1	C-reactive protein precursor [Rattus norvegicus]|P48199.1 RecName: Full=C-reactive protein	-	Pentaxin family;Concanavalin A-like lectin/glucanases superfamily	response to stress;biological_process;response to abiotic stimulus;response to decreased oxygen levels;response to stimulus;response to oxygen levels;acute inflammatory response;defense response;inflammatory response;metabolic process;adaptive immune response;immune effector process;activation of immune response;immune system process;leukocyte mediated immunity;lymphocyte mediated immunity;humora…	molecular_function;binding;metal ion binding;ion binding;cation binding;protein binding;opsonin binding;complement binding;steroid binding;lipid binding;sterol binding;small molecule binding;alcohol binding;organic cyclic compound binding;lipoprotein particle binding;protein-containing complex binding;protein-lipid complex binding;protein dimerization activity;identical protein binding;signaling …	cellular_component;membrane;extracellular region;extracellular space;cell;neuron projection;axon;site of polarized growth;intrinsic component of membrane;vesicle;axon part;cell projection;organelle;membrane-bounded organelle;extracellular organelle;extracellular region part;membrane part;cell projection part;cell part;neuron part;actin-based cell projection;plasma membrane bounded cell projection…	-	-	13.14	2.07	2.19	0.53	0.68	0.45	1.66	2.12	1.47	0.37	0.18	0.5
TR35874_c0_g1	-	-	-	-	-	-	-	-	13.13	13.81	22.61	154.57	133.93	143.22	1.88	2.72	3.4	30.09	25.04	25.57
TR4915_c0_g1	unnamed protein product [Rattus norvegicus]|AAA42173.1 serine protease inhibitor 2 [Rattus norvegicus]	Serpin-ZXB OS=Oryza sativa subsp. japonica OX=39947 GN=Os03g0610800 PE=2 SV=1	Serpin (serine protease inhibitor)	endothelial cell proliferation;regulation of endothelial cell proliferation;biological_process;cell proliferation;negative regulation of cell proliferation;cellular process;regulation of cell proliferation;negative regulation of biological process;negative regulation of cellular process;epithelial cell proliferation;regulation of epithelial cell proliferation;negative regulation of epithelial cel…	molecular_function;enzyme inhibitor activity;endopeptidase inhibitor activity;endopeptidase regulator activity;molecular function regulator;peptidase inhibitor activity;enzyme regulator activity;peptidase regulator activity;serine-type endopeptidase inhibitor activity	cellular_component;extracellular region;extracellular region part;extracellular space	-	-	12.95	2.34	1.7	0.62	0.48	0.83	2.53	2.02	1.32	0.26	0.33	0.43
TR175_c0_g1	PREDICTED: probable linoleate 9S-lipoxygenase 5 [Nelumbo nucifera]	Probable linoleate 9S-lipoxygenase 5 OS=Solanum tuberosum OX=4113 GN=LOX1.5 PE=2 SV=1	Lipoxygenase;PLAT/LH2 domain	-	-	-	K15718|LOX1_5; linoleate 9S-lipoxygenase [EC:1.13.11.58]	ko00591(Metabolism)	12.92	14.62	14.6	32.25	32.06	31.71	72.22	73.49	71.4	25.15	24.78	26.35
TR10_c5_g2	PREDICTED: probable pectate lyase 8 [Nelumbo nucifera]	Probable pectate lyase 8 OS=Arabidopsis thaliana OX=3702 GN=At3g07010 PE=2 SV=1	Pectate lyase;Right handed beta helix region	-	-	-	K01728|pel; pectate lyase [EC:4.2.2.2]	ko00040(Metabolism);ko01100(Metabolism);ko02024(Cellular Processes)	12.8	13.77	13.03	28.79	29.47	28.99	64.79	67.87	63.97	186.49	180.21	192.05
TR22381_c0_g1	-	-	Extensin-like region	-	-	-	-	-	12.79	13.67	14.83	6.34	7.21	5.6	22.1	35.54	14.16	4.92	4.06	3.21
TR1411_c0_g2	NAC domain-containing protein 68-like [Papaver somniferum]|RZC79089.1 hypothetical protein C5167_003312 [Papaver somniferum]	NAC domain-containing protein 68 OS=Oryza sativa subsp. japonica OX=39947 GN=NAC068 PE=2 SV=1	No apical meristem (NAM) protein	-	-	-	-	-	12.69	11.51	12.47	4.79	4.19	4.21	14.48	13.19	13.54	5.08	4.86	5.36
TR5463_c0_g1	ATP synthase, H+ transporting, mitochondrial F1 complex, beta polypeptide, isoform CRA_a [Rattus norvegicus]	ATP synthase subunit beta, mitochondrial OS=Zea mays OX=4577 GN=ATPB PE=2 SV=1	ATP synthase alpha/beta family, nucleotide-binding domain;ATP synthase alpha/beta family, beta-barrel domain	blood vessel development;vasculature development;multicellular organism development;anatomical structure morphogenesis;biological_process;anatomical structure formation involved in morphogenesis;multicellular organismal process;developmental process;tube morphogenesis;tube development;blood vessel morphogenesis;system development;anatomical structure development;cardiovascular system development;…	molecular_function;ATPase activity, coupled;catalytic activity;cation-transporting ATPase activity;ATPase activity, coupled to transmembrane movement of substances;nucleoside-triphosphatase activity;transporter activity;transmembrane transporter activity;ATPase activity;cation transmembrane transporter activity;ion transmembrane transporter activity;monovalent inorganic cation transmembrane trans…	proton-transporting two-sector ATPase complex;intracellular;cellular_component;membrane;mitochondrion;extracellular region;extracellular space;cell;cytoplasm;mitochondrial envelope;mitochondrial inner membrane;mitochondrial matrix;intracellular membrane-bounded organelle;nucleoid;organelle inner membrane;organelle membrane;mitochondrial membrane;organelle envelope;membrane-enclosed lumen;envelope…	-	-	12.48	4.15	4.79	1.29	1.44	1.5	3.62	3.21	2.36	1.04	0.82	0.84
TR2785_c0_g1	hypothetical protein AQUCO_06200008v1 [Aquilegia coerulea]	Probable xyloglucan endotransglucosylase/hydrolase protein 32 OS=Arabidopsis thaliana OX=3702 GN=XTH32 PE=2 SV=1	Glycosyl hydrolases family 16	-	-	-	-	-	12.14	11.45	12.46	38.12	37.22	36.92	136.21	149	148.69	717.3	770.78	703.04
TR2362_c2_g2	transcription factor ILR3-like protein isoform X2 [Cinnamomum micranthum f. kanehirae]	Transcription factor ILR3 OS=Arabidopsis thaliana OX=3702 GN=ILR3 PE=1 SV=1	Helix-loop-helix DNA-binding domain	-	-	-	-	-	12.13	14.68	14.62	4.08	5.05	4.83	2.36	2.17	2.62	8.15	8.64	8.76
TR145775_c0_g1	fibrinogen beta chain precursor [Rattus norvegicus]|P14480.4 RecName: Full=Fibrinogen beta chain	-	Fibrinogen beta and gamma chains, C-terminal globular domain;Fibrinogen alpha/beta chain family	immune system process;immune response;biological_process;response to stimulus;cell adhesion;biological adhesion;cell-substrate adhesion;metabolic process;proteolysis;protein processing;nitrogen compound metabolic process;gene expression;protein metabolic process;zymogen activation;macromolecule metabolic process;primary metabolic process;protein maturation;organic substance metabolic process;orga…	protein binding;molecular_function;binding;molecular adaptor activity;chaperone binding;structural molecule activity;signaling receptor binding;cell adhesion molecule binding;protein binding, bridging	plasma membrane;intracellular;cellular_component;membrane;extracellular region;extracellular space;cell;cytoplasm;secretory granule;cell surface;endomembrane system;cytoplasmic vesicle;vesicle;protein-containing complex;organelle;membrane-bounded organelle;intracellular organelle;extracellular organelle;extracellular region part;intracellular part;membrane part;cytoplasmic part;plasma membrane pa…	-	-	12.09	3.32	2.96	0.64	0.91	0.86	2.56	2.13	2.33	0.36	0.43	0.27
TR2691_c0_g2	Rhodanese-like domain [Macleaya cordata]	-	-	-	-	-	-	-	12.09	11.47	11.84	3.05	1.81	2.52	11.08	11.25	14.09	2.4	2.82	6.67
TR15709_c0_g1	selenoprotein P precursor [Rattus norvegicus]|NP_001077380.1 selenoprotein P precursor [Rattus norvegicus]|P25236.2 RecName: Full=Selenoprotein P	-	-	metabolic process;biological_process;cellular process;cellular metabolic process;multicellular organism development;nervous system development;central nervous system development;multicellular organismal process;developmental process;animal organ development;system development;anatomical structure development;head development;behavior;response to inorganic substance;response to chemical;response t…	molecular_function;binding;selenium binding	cellular_component;extracellular region;extracellular space;vesicle;organelle;membrane-bounded organelle;extracellular organelle;extracellular region part;extracellular vesicle;extracellular exosome	-	-	11.82	2.77	3.51	0.67	0.61	0.68	2.27	2.09	2.13	0.46	0.36	0.46
TR762_c0_g1	Sugar/inositol transporter [Macleaya cordata]	Sugar transporter ERD6-like 16 OS=Arabidopsis thaliana OX=3702 GN=At5g18840 PE=2 SV=2	Sugar (and other) transporter;Major Facilitator Superfamily;MFS/sugar transport protein;Sugar (and other) transporter	-	-	-	-	-	11.71	12.16	12.58	41.03	38.85	41.89	13.68	14.63	15.03	6.11	5.42	5.3
TR1014_c1_g3	hypothetical protein AQUCO_02800162v1 [Aquilegia coerulea]	Beta-amyrin synthase OS=Betula platyphylla OX=78630 GN=OSCBPY PE=1 SV=1	Squalene-hopene cyclase C-terminal domain;Prenyltransferase and squalene oxidase repeat;Squalene-hopene cyclase N-terminal domain;A-macroglobulin complement component;Pectic acid lyase	-	-	-	K15813|LUP4; beta-amyrin synthase [EC:5.4.99.39]	ko00909(Metabolism);ko01110(Metabolism)	11.69	11.85	13.11	0.13	0.21	0.18	3.46	4.14	4.06	0.49	0.55	0.57
TR189_c4_g1	-	-	-	-	-	-	-	-	11.58	11.24	12.48	1.76	1.81	2.46	17.19	16.63	16.32	4.06	3.87	3.08
TR11788_c0_g1	hypothetical protein AQUCO_00201386v1 [Aquilegia coerulea]	Butyrate--CoA ligase AAE11, peroxisomal OS=Arabidopsis thaliana OX=3702 GN=AAE11 PE=1 SV=1	AMP-binding enzyme;AMP-binding enzyme C-terminal domain	-	-	-	-	-	11.5	12.18	11.23	1.31	1.77	1.69	7.91	7.26	7.21	0.07	0.17	0.24
TR240_c1_g1	osmotin-like protein precursor [Ziziphus jujuba]|AGL07709.1 pathogenesis-related thaumatin-like protein [Ziziphus jujuba]	Osmotin-like protein OS=Solanum lycopersicum OX=4081 PE=1 SV=1	Thaumatin family	-	-	-	-	-	11.43	11.66	12.37	3.73	4.78	4.06	24.79	25.82	22.41	42.6	44.29	48.98
TR8841_c0_g1	heterodimeric geranylgeranyl pyrophosphate synthase small subunit, chloroplastic-like [Quercus suber]	Heterodimeric geranylgeranyl pyrophosphate synthase large subunit 1, chloroplastic OS=Arabidopsis thaliana OX=3702 GN=GGPPS1 PE=1 SV=2	Polyprenyl synthetase	-	-	-	K13789|GGPS; geranylgeranyl diphosphate synthase, type II [EC:2.5.1.1 2.5.1.10 2.5.1.29]	ko00900(Metabolism);ko01100(Metabolism);ko01110(Metabolism)	11.34	12.19	11.48	0.46	0.42	0.32	2.56	2.1	1.58	0.07	0.32	0.27
TR146827_c0_g1	beta-2-glycoprotein 1 precursor [Rattus norvegicus]|AAH88180.1 Apolipoprotein H (beta-2-glycoprotein I) [Rattus norvegicus]|EDM06447.1 apolipoprotein H [Rattus norvegicus]	-	Sushi repeat (SCR repeat);Beta-2-glycoprotein-1 fifth domain	endothelial cell proliferation;regulation of endothelial cell proliferation;biological_process;cell proliferation;negative regulation of cell proliferation;cellular process;regulation of cell proliferation;negative regulation of biological process;negative regulation of cellular process;epithelial cell proliferation;regulation of epithelial cell proliferation;negative regulation of epithelial cel…	molecular_function;binding;lipid binding;ion binding;anion binding;glycosaminoglycan binding;carbohydrate derivative binding;sulfur compound binding;protein binding;enzyme activator activity;molecular function regulator;enzyme regulator activity;lipase activator activity;phospholipid binding;lipoprotein lipase activator activity;heparin binding;identical protein binding	intracellular;cellular_component;membrane;extracellular region;extracellular space;cell;vesicle;protein-containing complex;protein-lipid complex;plasma lipoprotein particle;triglyceride-rich plasma lipoprotein particle;organelle;membrane-bounded organelle;extracellular organelle;extracellular region part;intracellular part;cell part;cell periphery;extracellular vesicle;lipoprotein particle;chylom…	-	-	10.96	2.55	2.85	0.34	0.77	0.58	2.56	2.21	1.77	0.2	0.41	0.33
TR11303_c1_g1	tyrosyl-DNA phosphodiesterase 2-like [Papaver somniferum]	-	Endonuclease/Exonuclease/phosphatase family	-	-	-	-	-	10.9	10.67	11.16	3.01	2.69	2.5	7.09	6.85	6.67	2.7	2.52	2.49
TR16876_c0_g1	Pectinesterase inhibitor domain [Macleaya cordata]	Pectinesterase inhibitor 6 OS=Arabidopsis thaliana OX=3702 GN=PMEI6 PE=2 SV=1	Plant invertase/pectin methylesterase inhibitor	-	-	-	-	-	10.72	12.52	12.6	1.25	1.52	1.46	4.62	4.44	4.39	2.3	1.92	1.16
TR6181_c0_g1	murinoglobulin-1 precursor [Rattus norvegicus]|Q03626.1 RecName: Full=Murinoglobulin-1	-	A-macroglobulin complement component;Alpha-2-macroglobulin family N-terminal region;Alpha-2-macroglobulin family;A-macroglobulin receptor;MG2 domain;Alpha-macro-globulin thiol-ester bond-forming region	acute inflammatory response;defense response;response to stress;inflammatory response;biological_process;response to stimulus;reproduction;multicellular organism development;female pregnancy;reproductive process;multicellular organismal process;developmental process;multi-organism reproductive process;multi-multicellular organism process;anatomical structure development;multi-organism process;met…	molecular_function;enzyme inhibitor activity;endopeptidase inhibitor activity;endopeptidase regulator activity;molecular function regulator;peptidase inhibitor activity;enzyme regulator activity;peptidase regulator activity;serine-type endopeptidase inhibitor activity	cellular_component;extracellular region;extracellular space;vesicle;organelle;membrane-bounded organelle;extracellular organelle;extracellular region part;extracellular vesicle;extracellular exosome;blood microparticle	-	-	10.57	1.7	1.81	0.62	0.42	0.54	1.32	1.36	1.39	0.26	0.28	0.3
TR20_c12_g1	-	Betaine aldehyde dehydrogenase, chloroplastic OS=Amaranthus hypochondriacus OX=28502 GN=BADH4 PE=3 SV=1	-	-	-	-	-	-	10.39	10.2	10.49	3.63	2.94	2.7	6.92	7.17	5.77	3.23	2.45	2.6
TR17281_c0_g1	PREDICTED: probable WRKY transcription factor 40 [Nelumbo nucifera]	Probable WRKY transcription factor 40 OS=Arabidopsis thaliana OX=3702 GN=WRKY40 PE=1 SV=1	-	-	-	-	-	-	10.34	12.18	11.75	4.36	4.68	4.31	14.96	14.32	16.34	5.6	5.6	4.83
TR11459_c0_g1	PREDICTED: anthranilate N-benzoyltransferase protein 1 [Nelumbo nucifera]	Omega-hydroxypalmitate O-feruloyl transferase OS=Arabidopsis thaliana OX=3702 GN=HHT1 PE=1 SV=1	Transferase family	-	-	-	-	-	10.32	11.01	9.93	3.51	3.55	3.81	15.39	14.7	16.52	6.28	5.86	6.71
TR29968_c0_g1	fetuin-like protein IRL685 [Rattus norvegicus]	-	Cystatin domain	reproduction;single fertilization;cell recognition;biological_process;fertilization;cellular process;cell-cell recognition;sexual reproduction;reproductive process;sperm-egg recognition;multi-organism reproductive process;multi-organism process;metabolic process;proteolysis;nitrogen compound metabolic process;negative regulation of metabolic process;negative regulation of peptidase activity;negat…	molecular_function;enzyme inhibitor activity;endopeptidase inhibitor activity;endopeptidase regulator activity;molecular function regulator;peptidase inhibitor activity;enzyme regulator activity;peptidase regulator activity;metalloendopeptidase inhibitor activity;cysteine-type endopeptidase inhibitor activity	cellular_component;extracellular region;extracellular space;vesicle;organelle;membrane-bounded organelle;extracellular organelle;extracellular region part;extracellular vesicle;extracellular exosome	-	-	10.31	2.8	2.55	0.92	1.09	0.8	2.39	2.37	2.16	0.5	0.24	0.39
TR1966_c0_g1	Rust resistance kinase Lr10 [Vitis vinifera]	Rust resistance kinase Lr10 OS=Triticum aestivum OX=4565 GN=LRK10 PE=2 SV=1	Protein kinase domain;Protein tyrosine kinase;Phosphotransferase enzyme family	-	-	-	K04730|IRAK1; interleukin-1 receptor-associated kinase 1 [EC:2.7.11.1]	ko04010(Environmental Information Processing);ko04064(Environmental Information Processing);ko04620(Organismal Systems);ko04624(Organismal Systems);ko04722(Organismal Systems)	10.28	11	11.27	3.62	3.28	3.26	12.78	12.96	13.62	2.89	2.85	3.08
TR3942_c0_g1	-	-	-	-	-	-	-	-	10.2	9.46	9.4	37.31	33.74	38.71	7.7	7.76	8.91	2.94	3.07	3.33
TR2197_c1_g1	PREDICTED: disease resistance protein RPM1-like isoform X2 [Vitis vinifera]	-	-	-	-	-	-	-	9.99	9.9	9.48	2.52	3.08	3.06	10.84	10.89	11.29	3.8	5.1	3.72
TR8679_c0_g1	uncharacterized protein LOC111287524 [Durio zibethinus]	-	-	-	-	-	-	-	9.34	10.55	9.67	0.38	0.69	1.07	5.21	6.63	5.35	0.77	1.11	0.33
TR78193_c0_g1	PREDICTED: GDSL esterase/lipase At3g26430 [Beta vulgaris subsp. vulgaris]|KMT07768.1 hypothetical protein BVRB_6g146910 [Beta vulgaris subsp. vulgaris]	GDSL esterase/lipase At3g26430 OS=Arabidopsis thaliana OX=3702 GN=At3g26430 PE=2 SV=1	-	-	-	-	-	-	9.1	12.45	12.85	58.64	56	57.7	219.3	230.12	212.37	65	67.75	73.31
TR21358_c0_g1	complement C3 precursor [Rattus norvegicus]|EDL83571.1 rCG45082 [Rattus norvegicus]	-	A-macroglobulin complement component;Alpha-2-macroglobulin family;A-macroglobulin receptor;Alpha-2-macroglobulin family N-terminal region;UNC-6/NTR/C345C module;MG2 domain;Alpha-macro-globulin thiol-ester bond-forming region;Anaphylotoxin-like domain	type IIa hypersensitivity;regulation of type IIa hypersensitivity;adaptive immune response;immune effector process;immune system process;inflammatory response to antigenic stimulus;acute inflammatory response to antigenic stimulus;leukocyte mediated immunity;myeloid leukocyte mediated immunity;type II hypersensitivity;lymphocyte mediated immunity;adaptive immune response based on somatic recombin…	molecular_function;enzyme inhibitor activity;endopeptidase regulator activity;molecular function regulator;peptidase inhibitor activity;enzyme regulator activity;peptidase regulator activity;binding;protein binding;G protein-coupled receptor binding;signaling receptor binding;C5a anaphylatoxin chemotactic receptor binding;C5L2 anaphylatoxin chemotactic receptor binding;cofactor binding;lipid bind…	cellular_component;extracellular region;extracellular space;vesicle;organelle;membrane-bounded organelle;extracellular organelle;extracellular region part;extracellular vesicle;blood microparticle;extracellular exosome	-	-	9.06	2.22	1.73	0.46	0.62	0.51	1.59	1.5	1.31	0.29	0.26	0.36
TR37539_c0_g1	Transcription factor TGA like domain [Macleaya cordata]	Protein DOG1-like 4 OS=Arabidopsis thaliana OX=3702 GN=DOGL4 PE=2 SV=1	Seed dormancy control	-	-	-	-	-	9.01	6.74	8.14	26.48	27.01	27.44	10.21	10.78	8.74	37	39.95	32.12
TR7493_c0_g1	PREDICTED: uncharacterized protein LOC104232135 [Nicotiana sylvestris]	-	-	-	-	-	-	-	8.87	10.52	8.54	1.21	1.15	0.97	5.61	5.92	5.68	0.3	0.45	0.36
TR14217_c0_g1	PREDICTED: esterase-like isoform X1 [Nelumbo nucifera]	GDSL esterase/lipase At3g26430 OS=Arabidopsis thaliana OX=3702 GN=At3g26430 PE=2 SV=1	GDSL-like Lipase/Acylhydrolase	-	-	-	-	-	8.8	7.55	10.3	37.06	40.26	40.79	192.31	174.43	178.09	32.04	38.11	34.92
TR1724_c0_g1	hypothetical protein AQUCO_01400221v1 [Aquilegia coerulea]	CBS domain-containing protein CBSCBSPB3 OS=Arabidopsis thaliana OX=3702 GN=CBSCBSPB3 PE=1 SV=1	PB1 domain	-	-	-	-	-	8.59	9.08	8.23	31.94	33.07	32.39	3.69	3.57	3.31	6.83	7.65	7.5
TR4159_c1_g1	hypothetical protein BVC80_7383g3 [Macleaya cordata]	-	-	-	-	-	-	-	8.56	8.3	7.18	25.02	24.52	24.88	10.97	11.17	10.81	4.37	4.25	4.34
TR5468_c0_g1	PREDICTED: pathogenesis-related genes transcriptional activator PTI5-like [Nelumbo nucifera]	Pathogenesis-related genes transcriptional activator PTI5 OS=Solanum lycopersicum OX=4081 GN=PTI5 PE=2 SV=1	AP2 domain	-	-	-	-	-	8.51	8.95	9.78	1.98	2.33	2.09	9.7	9.64	8.96	1.44	1.57	1.64
TR29532_c0_g1	Alpha/beta hydrolase fold-1 [Macleaya cordata]	-	alpha/beta hydrolase fold;Alpha/beta hydrolase family	-	-	-	-	-	8.35	7.48	9.8	3.03	3	4.08	13.09	13.23	11.79	4.06	3.81	2.72
TR5606_c0_g1	-	-	-	-	-	-	-	-	8.22	8.57	6.94	0.79	0.36	1.31	37.5	35.76	36.29	2.54	3.29	2.77
TR7739_c1_g1	-	-	-	-	-	-	-	-	8.11	8.29	8.8	15.8	18.51	17.37	7.18	8.12	10.28	28.55	31.61	27.3
TR2945_c0_g1	probably inactive leucine-rich repeat receptor-like protein kinase At5g48380 [Citrus clementina]|ESR61763.1 hypothetical protein CICLE_v10014622mg [Citrus clementina]	Probably inactive leucine-rich repeat receptor-like protein kinase At5g48380 OS=Arabidopsis thaliana OX=3702 GN=At5g48380 PE=1 SV=1	Leucine rich repeat;Leucine Rich repeats (2 copies);Leucine rich repeat N-terminal domain	-	-	-	-	-	8.06	8.97	10.68	22.82	21.59	22.55	65.67	67.81	67.81	22.09	20.77	22.14
TR175753_c0_g1	RecName: Full=Hemopexin	-	Hemopexin;Hemopexin	immune effector process;immune system process;immunoglobulin production;production of molecular mediator of immune response;regulation of immunoglobulin production;regulation of immune system process;positive regulation of immune system process;regulation of immune effector process;positive regulation of immune effector process;regulation of production of molecular mediator of immune response;pos…	molecular_function;binding;ion binding;cation binding;transporter activity;transmembrane transporter activity;cofactor transmembrane transporter activity;metal ion binding;heme transporter activity	cellular_component;extracellular region;extracellular space;vesicle;organelle;membrane-bounded organelle;extracellular organelle;extracellular region part;extracellular vesicle;cell;blood microparticle;extracellular exosome	-	-	7.83	1.32	1.35	0.42	0.49	0.47	1.51	1.28	1.03	0.14	0.19	0.21
TR528_c1_g2	-	-	-	-	-	-	-	-	7.79	10.58	7.83	3.96	3.98	3.07	21.42	27.52	25.05	7.12	9.36	6.96
TR13454_c0_g1	hypothetical protein AQUCO_00100565v1 [Aquilegia coerulea]	Probable sulfate transporter 3.4 OS=Arabidopsis thaliana OX=3702 GN=SULTR3	Sulfate permease family;STAS domain	-	-	-	-	-	7.63	7.34	7.54	1.25	1.45	1.56	4.22	4.2	3.76	1.45	1.59	1.74
TR3726_c0_g1	GIGANTEA [Macleaya cordata]	Protein GIGANTEA OS=Arabidopsis thaliana OX=3702 GN=GI PE=1 SV=2	-	-	-	-	K12124|GI; GIGANTEA	ko04712(Organismal Systems)	7.35	7.62	7.57	1.77	1.98	2.2	18.6	19.48	17.41	2.46	1.54	1.85
TR7020_c0_g1	hypothetical protein H671_3g10769 [Cricetulus griseus]	-	-	-	-	-	-	-	7.05	2.06	2.73	0.5	0.6	0.59	1.61	1.21	1.44	0.51	0.34	0.34
TR6469_c0_g1	fibrinogen gamma chain precursor [Rattus norvegicus]|AAH78893.1 Fibrinogen gamma chain [Rattus norvegicus]|EDM00841.1 fibrinogen, gamma polypeptide, isoform CRA_a [Rattus norvegicus]	-	Fibrinogen beta and gamma chains, C-terminal globular domain;Fibrinogen alpha/beta chain family	cell adhesion;biological_process;biological adhesion;cell-substrate adhesion;metabolic process;proteolysis;protein processing;nitrogen compound metabolic process;gene expression;protein metabolic process;zymogen activation;macromolecule metabolic process;primary metabolic process;protein maturation;organic substance metabolic process;organonitrogen compound metabolic process;regulation of cell-ce…	protein binding;molecular_function;binding;molecular adaptor activity;ion binding;cation binding;protein dimerization activity;identical protein binding;protein homodimerization activity;structural molecule activity;signaling receptor binding;metal ion binding;cell adhesion molecule binding;protein binding, bridging	plasma membrane;intracellular;cellular_component;membrane;extracellular region;extracellular space;cell;cytoplasm;secretory granule;cell surface;endomembrane system;cytoplasmic vesicle;vesicle;protein-containing complex;organelle;membrane-bounded organelle;intracellular organelle;extracellular organelle;extracellular region part;intracellular part;membrane part;cytoplasmic part;plasma membrane pa…	-	-	6.6	2.24	1.49	0.52	0.6	0.42	1.82	1.52	1.54	0.43	0.39	0.53
TR283_c0_g1	SKP1-like protein 1B [Carica papaya]	SKP1-like protein 1A OS=Arabidopsis thaliana OX=3702 GN=SKP1A PE=1 SV=1	Skp1 family, tetramerisation domain	-	-	-	K03094|SKP1, CBF3D; S-phase kinase-associated protein 1	ko04110(Cellular Processes);ko04111(Cellular Processes);ko04114(Cellular Processes);ko04120(Genetic Information Processing);ko04141(Genetic Information Processing);ko04310(Environmental Information Processing);ko04341(Environmental Information Processing);ko04350(Environmental Information Processing);ko04710(Organismal Systems)	6.58	8.44	5.82	69.13	66.15	69.49	10.63	11.85	12.05	24.4	25.98	24.21
TR12491_c0_g1	PREDICTED: protein WALLS ARE THIN 1-like [Nelumbo nucifera]	Protein WALLS ARE THIN 1 OS=Arabidopsis thaliana OX=3702 GN=WAT1 PE=1 SV=1	EamA-like transporter family	-	-	-	-	-	6.49	6.86	6.17	1.54	1.2	1.71	5.78	6.08	4.89	0.22	0.19	0.44
TR5075_c1_g1	Disease resistance protein [Macleaya cordata]	-	NB-ARC domain	-	-	-	-	-	6.19	8.63	6.63	1.41	1.62	0.58	9.89	15.34	19.39	1.79	0.33	0.71
TR7323_c0_g1	PREDICTED: glutamate receptor 3.3-like isoform X3 [Nelumbo nucifera]	Glutamate receptor 3.3 OS=Arabidopsis thaliana OX=3702 GN=GLR3.3 PE=2 SV=1	Receptor family ligand binding region;Ligand-gated ion channel;Bacterial extracellular solute-binding proteins, family 3;Periplasmic binding protein;Ligated ion channel L-glutamate- and glycine-binding site	-	-	-	-	-	6.19	7.05	7.01	1.84	1.84	1.57	5.67	5.25	5.59	1.83	1.79	1.88
TR1001_c0_g2	11-beta-hydroxysteroid dehydrogenase-like 5 [Papaver somniferum]	11-beta-hydroxysteroid dehydrogenase-like 5 OS=Arabidopsis thaliana OX=3702 GN=HSD5 PE=2 SV=1	short chain dehydrogenase;Enoyl-(Acyl carrier protein) reductase;KR domain	-	-	-	-	-	6.11	6	4.99	2.16	2.07	2	21.91	22.17	22.04	5.17	4.59	4.84
TR4953_c0_g1	PREDICTED: putative receptor protein kinase ZmPK1 [Nelumbo nucifera]	Putative receptor protein kinase ZmPK1 OS=Zea mays OX=4577 GN=PK1 PE=2 SV=2	Protein kinase domain;Protein tyrosine kinase	-	-	-	-	-	6.09	5.06	4.7	17.94	16.67	14.72	5.78	7.13	7.84	13.89	15.03	17.21
TR55915_c0_g1	inter-alpha-trypsin inhibitor heavy chain H4 precursor [Rattus norvegicus]|AAH89806.1 Inter alpha-trypsin inhibitor, heavy chain 4 [Rattus norvegicus]|EDL88978.1 inter alpha-trypsin inhibitor, heavy chain 4, isoform CRA_a [Rattus norvegicus]	-	Vault protein inter-alpha-trypsin domain;von Willebrand factor type A domain;von Willebrand factor type A domain;von Willebrand factor type A domain;vWA found in TerF C terminus	acute inflammatory response;defense response;response to stress;inflammatory response;biological_process;response to stimulus;metabolic process;proteolysis;nitrogen compound metabolic process;negative regulation of metabolic process;cellular process;negative regulation of peptidase activity;negative regulation of macromolecule metabolic process;regulation of metabolic process;protein metabolic pr…	molecular_function;binding;metal ion binding;ion binding;cation binding;enzyme inhibitor activity;endopeptidase inhibitor activity;endopeptidase regulator activity;molecular function regulator;peptidase inhibitor activity;enzyme regulator activity;peptidase regulator activity;glycosaminoglycan binding;carboxylic acid binding;small molecule binding;anion binding;organic acid binding;carbohydrate d…	intracellular;cellular_component;membrane;extracellular region;extracellular space;cell;vesicle;organelle;membrane-bounded organelle;extracellular organelle;extracellular region part;intracellular part;cell part;cell periphery;extracellular vesicle;extracellular exosome;blood microparticle;cytoplasm;plasma membrane	-	-	6.06	1.04	1.18	0.27	0.31	0.24	1.13	0.84	0.87	0.14	0.16	0.19
TR887_c2_g2	hypothetical protein AQUCO_02800036v1 [Aquilegia coerulea]|PIA38110.1 hypothetical protein AQUCO_02800036v1 [Aquilegia coerulea]	1-aminocyclopropane-1-carboxylate oxidase OS=Actinidia deliciosa OX=3627 GN=ACO PE=2 SV=1	2OG-Fe(II) oxygenase superfamily;non-haem dioxygenase in morphine synthesis N-terminal	-	-	-	K05933|E1.14.17.4; aminocyclopropanecarboxylate oxidase [EC:1.14.17.4]	ko00270(Metabolism);ko01100(Metabolism);ko01110(Metabolism)	6	6.48	8.81	93.17	89.66	85.31	4.82	3.75	3.23	164.33	148.73	167.12
TR5789_c2_g1	-	-	-	-	-	-	-	-	5.97	7.33	7.92	1.65	2.24	1.65	11.92	10.51	12.81	1.02	0.49	1.19
TR10064_c1_g1	Bet v I domain [Macleaya cordata]	-	Pathogenesis-related protein Bet v I family	-	-	-	-	-	5.96	7.29	6.91	43.29	52.14	50.59	15.98	16.54	18.68	29.21	32.04	35.55
TR2645_c0_g1	uncharacterized protein LOC113359950 [Papaver somniferum]	Sugar transporter ERD6-like 5 OS=Arabidopsis thaliana OX=3702 GN=At1g54730 PE=2 SV=2	Sugar (and other) transporter;Major Facilitator Superfamily;Sugar (and other) transporter	-	-	-	-	-	5.93	6.35	6.58	14.21	13.38	13.57	6.25	6.02	6.15	18.59	18.94	19.88
TR3088_c0_g1	Peptidase C13 [Macleaya cordata]	Vacuolar-processing enzyme OS=Ricinus communis OX=3988 PE=1 SV=1	Peptidase C13 family	-	-	-	K01369|LGMN; legumain [EC:3.4.22.34]	ko04142(Cellular Processes);ko04612(Organismal Systems)	5.9	6.43	6.09	1.4	1.61	1.75	26.72	26.82	26.73	5.99	6.24	5.54
TR2288_c0_g1	Sugar/inositol transporter [Macleaya cordata]	Sugar transport protein MST6 OS=Oryza sativa subsp. japonica OX=39947 GN=MST6 PE=1 SV=1	Sugar (and other) transporter	-	-	-	-	-	5.86	5.88	6.02	2.53	1.74	2.19	4.82	4.68	5.12	11.43	11.68	11.92
TR2405_c0_g3	PREDICTED: probable E3 ubiquitin-protein ligase XERICO [Vitis vinifera]|RVW55134.1 E3 ubiquitin-protein ligase RHA2A [Vitis vinifera]|RVX21166.1 E3 ubiquitin-protein ligase RHA2A [Vitis vinifera]	E3 ubiquitin-protein ligase RHA2B OS=Arabidopsis thaliana OX=3702 GN=RHA2B PE=1 SV=2	Ring finger domain;RING-like zinc finger;Zinc finger, C3HC4 type (RING finger);Zinc finger, C3HC4 type (RING finger);RING-H2 zinc finger domain;Prokaryotic RING finger family 4	-	-	-	-	-	5.82	5.54	4.89	13.22	12.27	14.23	28.72	30.45	32.02	100.46	102.41	100.06
TR9081_c0_g1	uncharacterized protein LOC114315018 [Camellia sinensis]	-	-	-	-	-	-	-	5.65	6.08	5.18	1.88	1.46	1.7	6.01	5.75	5.68	2.23	1.57	2.59
TR22071_c0_g1	-	-	-	-	-	-	-	-	5.56	7.11	7.83	16.03	16.21	18.52	10.54	8.12	8.15	2.07	2.52	3.38
TR532_c1_g2	Late embryogenesis abundant protein [Macleaya cordata]	NDR1/HIN1-like protein 26 OS=Arabidopsis thaliana OX=3702 GN=NHL26 PE=2 SV=1	Late embryogenesis abundant protein	-	-	-	-	-	5.54	4.71	4.62	1.34	1.36	1.81	12.4	14.09	11.29	1.82	1.41	1.92
TR43567_c0_g1	disease resistance protein RPM1-like isoform X1 [Ziziphus jujuba]	-	-	-	-	-	-	-	5.48	5.08	5.11	1.28	2.05	1.49	4.1	4.03	3.71	0.87	0.89	1.09
TR2860_c0_g1	PREDICTED: 15.4 kDa class V heat shock protein-like [Nelumbo nucifera]	15.4 kDa class V heat shock protein OS=Arabidopsis thaliana OX=3702 GN=HSP15.4 PE=2 SV=1	-	-	-	-	K13993|HSP20; HSP20 family protein	ko04141(Genetic Information Processing)	5.42	6	6.79	2.69	2.51	2.88	1.27	0.66	0.33	8.08	8.27	7.53
TR48459_c0_g2	pathogenesis-related (PR)-10-related norcoclaurine synthase-like protein [Eschscholzia californica]	S-norcoclaurine synthase 2 OS=Papaver somniferum OX=3469 GN=NCS2 PE=1 SV=1	-	-	-	-	-	-	5.22	4.57	0.97	38.26	31.77	38.57	6.07	3.41	2.75	566.37	598.55	535.84
TR1510_c1_g1	PREDICTED: uncharacterized protein LOC104588729 [Nelumbo nucifera]	-	Late embryogenesis abundant protein	-	-	-	-	-	5.16	6.12	5.62	12.53	11.59	13.89	5.67	4.54	4.93	9.37	8.12	9.36
TR16524_c0_g2	major urinary protein precursor [Rattus norvegicus]|P02761.1 RecName: Full=Major urinary protein	-	Lipocalin / cytosolic fatty-acid binding protein family	metabolic process;generation of precursor metabolites and energy;oxidation-reduction process;biological_process;cellular process;energy derivation by oxidation of organic compounds;cellular metabolic process;signal transduction;transmembrane receptor protein tyrosine kinase signaling pathway;cell communication;cell surface receptor signaling pathway;enzyme linked receptor protein signaling pathwa…	molecular_function;catalytic activity;protein kinase activity;protein tyrosine kinase activity;transmembrane receptor protein tyrosine kinase activity;transmembrane signaling receptor activity;signaling receptor activity;kinase activity;protein-hormone receptor activity;transferase activity;transferase activity, transferring phosphorus-containing groups;phosphotransferase activity, alcohol group …	intracellular;cellular_component;extracellular region;cell;cytoplasm;intracellular membrane-bounded organelle;organelle;membrane-bounded organelle;intracellular organelle;extracellular region part;intracellular part;cytoplasmic part;cell part;cytosol;extracellular space;nucleus	-	-	5.07	1.33	1.01	0.19	0.06	0.26	1.26	1.57	1.38	0.16	0.16	0.16
TR6181_c0_g2	alpha-1-macroglobulin precursor [Rattus norvegicus]|Q63041.1 RecName: Full=Alpha-1-macroglobulin	-	A-macroglobulin complement component;Alpha-2-macroglobulin family N-terminal region;A-macroglobulin receptor;Alpha-2-macroglobulin family;MG2 domain;Alpha-macro-globulin thiol-ester bond-forming region	reproduction;multicellular organism development;female pregnancy;biological_process;reproductive process;multicellular organismal process;developmental process;multi-organism reproductive process;multi-multicellular organism process;anatomical structure development;multi-organism process;metabolic process;proteolysis;nitrogen compound metabolic process;negative regulation of metabolic process;cel…	molecular_function;enzyme inhibitor activity;endopeptidase inhibitor activity;endopeptidase regulator activity;molecular function regulator;peptidase inhibitor activity;enzyme regulator activity;peptidase regulator activity;protein binding;growth factor binding;neurotrophin binding;binding;brain-derived neurotrophic factor binding;serine-type endopeptidase inhibitor activity;nerve growth factor b…	cellular_component;extracellular region;extracellular region part;extracellular space	-	-	5.06	0.8	0.79	0.27	0.26	0.27	0.8	0.6	0.75	0.12	0.17	0.07
TR1477_c5_g1	Alcohol dehydrogenase superfamily [Macleaya cordata]	Probable mannitol dehydrogenase OS=Fragaria ananassa OX=3747 GN=CAD PE=2 SV=1	Alcohol dehydrogenase GroES-like domain;Zinc-binding dehydrogenase;D-isomer specific 2-hydroxyacid dehydrogenase, NAD binding domain	-	-	-	K00083|CAD; cinnamyl-alcohol dehydrogenase [EC:1.1.1.195]	ko00940(Metabolism);ko01100(Metabolism);ko01110(Metabolism)	4.94	5.32	4.4	1.25	1.51	1.71	18.73	15.81	12.83	1.26	1.61	1.68
TR10228_c0_g1	PREDICTED: aspartyl protease family protein 2-like [Nelumbo nucifera]	Aspartyl protease family protein 2 OS=Arabidopsis thaliana OX=3702 GN=APF2 PE=2 SV=1	Xylanase inhibitor N-terminal;Xylanase inhibitor C-terminal;Eukaryotic aspartyl protease	-	-	-	-	-	4.9	5.18	4.48	1.01	0.83	0.86	6.57	5.51	4.86	2.15	2.36	2.66
TR7706_c0_g1	hypothetical protein AQUCO_01100098v1 [Aquilegia coerulea]	HVA22-like protein e OS=Arabidopsis thaliana OX=3702 GN=HVA22E PE=2 SV=1	TB2/DP1, HVA22 family	-	-	-	-	-	4.81	6.19	4.36	1.86	1.62	1.57	5.72	5.93	6.29	2.34	2.11	1.83
TR15886_c1_g1	-	-	-	-	-	-	-	-	4.76	6.77	7.06	11.24	12	15.23	5.25	5.51	7.46	11.43	12.24	10.16
TR4290_c0_g1	hypothetical protein BVC80_155g19 [Macleaya cordata]	-	-	-	-	-	-	-	4.69	6.92	8.6	1.49	1.84	1.41	5.5	5.55	5.66	13.55	14.98	13.23
TR4894_c0_g1	hypothetical protein AQUCO_00700516v1 [Aquilegia coerulea]	Receptor-like cytosolic serine/threonine-protein kinase RBK1 OS=Arabidopsis thaliana OX=3702 GN=RBK1 PE=1 SV=1	Protein kinase domain;Protein tyrosine kinase	-	-	-	-	-	4.68	4.98	4.36	0.99	0.98	0.94	2.22	2	2.39	10.42	10.33	11.42
TR52337_c0_g2	PREDICTED: beta-amyrin synthase-like [Nelumbo nucifera]	Beta-amyrin synthase OS=Betula platyphylla OX=78630 GN=OSCBPY PE=1 SV=1	Squalene-hopene cyclase N-terminal domain;Prenyltransferase and squalene oxidase repeat;Squalene-hopene cyclase C-terminal domain	-	-	-	K15813|LUP4; beta-amyrin synthase [EC:5.4.99.39]	ko00909(Metabolism);ko01110(Metabolism)	4.63	3.83	4.44	0.04	0.05	0.11	2.8	2.73	3.08	0.47	0.33	0.68
TR1068_c1_g1	Protein kinase domain [Macleaya cordata]	Probable serine/threonine protein kinase IRE OS=Arabidopsis thaliana OX=3702 GN=IRE PE=2 SV=1	Protein kinase domain;Protein tyrosine kinase	-	-	-	-	-	4.53	4.71	4.56	1.59	1.69	1.48	0.89	0.72	0.7	0.12	0.08	0.16
TR12520_c0_g1	Pr180 [Moloney murine leukemia virus]	-	Zinc-finger like, probable DNA-binding;RNase H;Integrase core domain;Reverse transcriptase (RNA-dependent DNA polymerase);His(2)-Cys(2) zinc finger;ENV polyprotein (coat polyprotein);Matrix protein (MA), p15;Gag polyprotein, inner coat protein p12	-	-	-	-	-	4.53	0.61	0.59	0.07	0.11	0.05	0.51	0.34	0.09	0.05	0.03	0.03
TR57862_c0_g1	probably inactive leucine-rich repeat receptor-like protein kinase At5g48380 isoform X3 [Herrania umbratica]	Polygalacturonase inhibitor 1 OS=Arabidopsis thaliana OX=3702 GN=PGIP1 PE=1 SV=1	-	-	-	-	-	-	4.47	3.77	3.2	13.58	13.61	16.31	41.15	40.07	38.36	9.47	10.5	11.02
TR3991_c0_g1	Heavy metal-associated domain [Macleaya cordata]	Heavy metal-associated isoprenylated plant protein 23 OS=Arabidopsis thaliana OX=3702 GN=HIPP23 PE=1 SV=1	Heavy-metal-associated domain	-	-	-	-	-	4.43	4.05	4.81	1.16	0.55	0.84	3.63	3.65	3.77	1.26	0.87	1.19
TR7014_c0_g1	hypothetical protein Ahy_A01g003929 isoform B [Arachis hypogaea]	SKP1-like protein 1A OS=Arabidopsis thaliana OX=3702 GN=SKP1A PE=1 SV=1	Skp1 family, dimerisation domain	-	-	-	-	-	4.41	3.59	3.9	16.19	17.44	16.88	3.55	3.31	4.01	9.75	10.29	7.92
TR28069_c0_g1	RecName: Full=Taraxerol synthase	Taraxerol synthase OS=Kalanchoe daigremontiana OX=23013 PE=1 SV=1	Squalene-hopene cyclase C-terminal domain	-	-	-	-	-	4.39	6.29	6.41	0.65	0.82	0.63	3.52	3.61	3.39	0.53	0.44	0.53
TR29802_c0_g1	-	-	-	-	-	-	-	-	4.33	2.09	0	251.81	219.43	239.34	1.58	1.54	0	172.92	199.52	185.95
TR40106_c1_g1	-	-	-	-	-	-	-	-	4.31	4.02	4.59	0.82	0.95	0.53	4.47	6.14	4.88	0.44	0.26	0.11
TR228_c4_g1	PREDICTED: lysine histidine transporter-like 8 [Nelumbo nucifera]	Lysine histidine transporter-like 8 OS=Arabidopsis thaliana OX=3702 GN=AATL1 PE=1 SV=1	Transmembrane amino acid transporter protein	-	-	-	-	-	4.19	4.72	4.44	0.92	0.82	1.03	17.32	17.23	16.72	0.47	0.34	0.29
TR2646_c1_g1	PREDICTED: myrcene synthase, chloroplastic-like isoform X2 [Eucalyptus grandis]	Alpha-terpineol synthase, chloroplastic OS=Magnolia grandiflora OX=3406 PE=1 SV=1	Terpene synthase, N-terminal domain;Terpene synthase, N-terminal domain	-	-	-	-	-	4.18	4.35	4.6	0.25	0.26	0.23	0.77	1.07	1.2	0.15	0.05	0.07
TR990_c1_g1	PREDICTED: NAC domain-containing protein 90-like isoform X1 [Nelumbo nucifera]	NAC domain-containing protein 90 OS=Arabidopsis thaliana OX=3702 GN=NAC090 PE=1 SV=1	No apical meristem (NAM) protein	-	-	-	-	-	4.1	4.58	4.26	7.69	9.34	9.45	2.2	2.4	2.89	0.19	0.36	0.19
TR9550_c0_g1	myosin-6 [Rattus norvegicus]|EDM14208.1 rCG23609, isoform CRA_a [Rattus norvegicus]	Myosin-10 OS=Arabidopsis thaliana OX=3702 GN=XI-D PE=3 SV=1	Myosin head (motor domain);Myosin tail;Myosin N-terminal SH3-like domain	multicellular organism development;embryo development;biological_process;embryo development ending in birth or egg hatching;multicellular organismal process;developmental process;chordate embryonic development;anatomical structure development;system process;circulatory system process;heart process;blood circulation;regulation of heart contraction;regulation of system process;regulation of biologi…	molecular_function;motor activity;catalytic activity;nucleoside-triphosphatase activity;pyrophosphatase activity;hydrolase activity;hydrolase activity, acting on acid anhydrides;hydrolase activity, acting on acid anhydrides, in phosphorus-containing anhydrides;protein binding;binding;cytoskeletal protein binding;nucleotide binding;drug binding;purine nucleotide binding;adenyl nucleotide binding;r…	intracellular;cellular_component;contractile fiber;cell;cytoplasm;intracellular membrane-bounded organelle;cytoskeleton;actin cytoskeleton;myosin complex;myosin II complex;myofibril;sarcomere;I band;actin filament bundle;protein-containing complex;actomyosin;organelle;membrane-bounded organelle;non-membrane-bounded organelle;intracellular organelle;intracellular non-membrane-bounded organelle;org…	-	-	4.06	2.17	2.31	0.55	0.92	0.88	2.3	1.94	1.36	0.47	0.4	0.4
TR4915_c0_g2	RecName: Full=Serine protease inhibitor A3N	Serpin-ZX OS=Arabidopsis thaliana OX=3702 GN=At1g47710 PE=1 SV=1	Serpin (serine protease inhibitor)	defense response;response to stress;biological_process;response to stimulus;metabolic process;proteolysis;nitrogen compound metabolic process;negative regulation of metabolic process;cellular process;negative regulation of peptidase activity;negative regulation of macromolecule metabolic process;regulation of metabolic process;protein metabolic process;regulation of proteolysis;regulation of cell…	molecular_function;enzyme inhibitor activity;endopeptidase inhibitor activity;endopeptidase regulator activity;molecular function regulator;peptidase inhibitor activity;enzyme regulator activity;peptidase regulator activity;serine-type endopeptidase inhibitor activity	cellular_component;extracellular region;extracellular region part;extracellular space	-	-	4.05	1.16	1.03	0.23	0.37	0.25	1.07	0.77	0.83	0.2	0.07	0.17
TR5668_c0_g2	Peptidase A1 [Macleaya cordata]	Protein ASPARTIC PROTEASE IN GUARD CELL 1 OS=Arabidopsis thaliana OX=3702 GN=ASPG1 PE=1 SV=1	Xylanase inhibitor N-terminal;Xylanase inhibitor C-terminal;Eukaryotic aspartyl protease	-	-	-	-	-	4.05	3.87	3.84	1.49	1.98	1.83	7.07	7	5.68	1.24	0.89	0.92
TR93493_c0_g1	3-hydroxy-3-methylglutaryl-Coenzyme A synthase 2, isoform CRA_b, partial [Mus musculus]|EDL38957.1 3-hydroxy-3-methylglutaryl-Coenzyme A synthase 2, isoform CRA_b, partial [Mus musculus]	Hydroxymethylglutaryl-CoA synthase OS=Arabidopsis thaliana OX=3702 GN=HMGS PE=1 SV=2	Hydroxymethylglutaryl-coenzyme A synthase C terminal;Hydroxymethylglutaryl-coenzyme A synthase N terminal	urogenital system development;multicellular organism development;biological_process;multicellular organismal process;developmental process;animal organ development;system development;anatomical structure development;renal system development;gland development;hepaticobiliary system development;metabolic process;alcohol metabolic process;lipid metabolic process;steroid biosynthetic process;steroid …	molecular_function;catalytic activity;transferase activity;transferase activity, transferring acyl groups;transferase activity, transferring acyl groups, acyl groups converted into alkyl on transfer;hydroxymethylglutaryl-CoA synthase activity	intracellular;cellular_component;membrane;mitochondrion;cell;cytoplasm;mitochondrial envelope;intracellular membrane-bounded organelle;organelle inner membrane;organelle membrane;mitochondrial membrane;organelle envelope;membrane-enclosed lumen;envelope;organelle;membrane-bounded organelle;intracellular organelle;organelle lumen;organelle part;intracellular part;mitochondrial part;cytoplasmic par…	K01641|E2.3.3.10; hydroxymethylglutaryl-CoA synthase [EC:2.3.3.10]	ko00072(Metabolism);ko00280(Metabolism);ko00650(Metabolism);ko00900(Metabolism);ko01100(Metabolism);ko01110(Metabolism);ko03320(Organismal Systems)	3.92	1.03	1.07	0.21	0.11	0.12	0.7	0.62	0.7	0.14	0.09	0.11
TR6872_c0_g1	zinc finger protein [Macleaya cordata]	E3 ubiquitin-protein ligase ATL4 OS=Arabidopsis thaliana OX=3702 GN=ATL4 PE=1 SV=1	Ring finger domain;RING-like zinc finger;RING-H2 zinc finger domain;Zinc finger, C3HC4 type (RING finger)	-	-	-	-	-	3.89	4.02	3.9	8	6.91	7.51	2.09	2.49	2.61	3.85	5.28	6.11
TR2510_c0_g1	hypothetical protein AQUCO_01300465v1 [Aquilegia coerulea]	Subtilisin-like protease SBT1.1 OS=Arabidopsis thaliana OX=3702 GN=SBTI1.1 PE=1 SV=1	Subtilase family;Peptidase inhibitor I9;PA domain	-	-	-	-	-	3.88	4.2	4.3	1.76	1.72	2.11	13.52	15.11	12.67	5.5	4.86	4.97
TR5326_c1_g1	-	-	-	-	-	-	-	-	3.84	3.8	2.92	8.03	8.5	7.67	2.46	3.3	2.49	5.15	5.1	4.8
TR20457_c0_g1	Disease resistance RPP13-like protein 4 [Cinnamomum micranthum f. kanehirae]	Disease resistance RPP13-like protein 4 OS=Arabidopsis thaliana OX=3702 GN=RPP13L4 PE=1 SV=2	NB-ARC domain	-	-	-	-	-	3.83	4.63	3.56	0.42	0.5	0.64	1.77	1.89	2.85	0.55	0.81	0.4
TR55061_c1_g1	-	-	Leucine Rich repeats (2 copies);Leucine Rich Repeat;Leucine rich repeat	-	-	-	-	-	3.81	4.08	4.21	0.61	0.41	0.86	6.24	7.22	9.56	2.67	2.88	2.86
TR52865_c0_g3	plasminogen precursor [Rattus norvegicus]|Q01177.2 RecName: Full=Plasminogen	-	Kringle domain;Trypsin;PAN domain;Trypsin-like peptidase domain;Domain of unknown function (DUF1986)	metabolic process;nitrogen compound metabolic process;biological_process;protein metabolic process;macromolecule metabolic process;primary metabolic process;organic substance metabolic process;organonitrogen compound metabolic process;response to stress;growth;tissue development;response to wounding;regeneration;developmental process;wound healing;developmental growth;anatomical structure develop…	molecular_function;catalytic activity;endopeptidase activity;serine-type peptidase activity;peptidase activity;peptidase activity, acting on L-amino acid peptides;hydrolase activity;serine hydrolase activity;catalytic activity, acting on a protein;serine-type endopeptidase activity	plasma membrane;cellular_component;extrinsic component of membrane;membrane;cell;intrinsic component of membrane;membrane part;plasma membrane part;cell part;cell periphery;integral component of membrane;extrinsic component of plasma membrane;extracellular region	K01315|PLG; plasminogen [EC:3.4.21.7]	ko04080(Environmental Information Processing);ko04610(Organismal Systems)	3.78	0.76	0.88	0.2	0.14	0.14	0.7	0.69	0.5	0.1	0.12	0.26
TR7904_c0_g1	PREDICTED: zinc finger CCCH domain-containing protein 32-like [Nelumbo nucifera]	Zinc finger CCCH domain-containing protein 34 OS=Oryza sativa subsp. japonica OX=39947 GN=Os05g0176400 PE=2 SV=1	Zinc-finger containing family	-	-	-	-	-	3.78	3.09	4.65	7.58	6.23	7.68	3.73	3.07	2.68	0.44	0.63	1.91
TR4189_c0_g1	-	-	Late embryogenesis abundant protein	-	-	-	-	-	3.7	5.1	3.94	0.76	1.21	1.2	162.16	165	162.64	6.79	5.93	6.5
TR3531_c0_g1	-	-	-	-	-	-	-	-	3.67	2.62	2.79	6.15	6.33	6.61	14.2	15.86	14.49	4.29	3.99	4.74
TR8108_c1_g1	-	-	-	-	-	-	-	-	3.63	3.27	5.46	0.23	0	0.22	4.68	3.41	4.9	0.27	0.32	0.4
TR362_c0_g1	abscisic acid 8&apos	Abscisic acid 8&apos	Cytochrome P450	-	-	-	K09843|CYP707A; (+)-abscisic acid 8'-hydroxylase [EC:1.14.14.137]	ko00906(Metabolism)	3.61	3.08	3.21	7.31	6.99	7.03	19.35	19.09	19.16	3	3.38	3.4
TR47_c0_g1	hypothetical protein AQUCO_07400085v1 [Aquilegia coerulea]	Protein NRT1/ PTR FAMILY 4.6 OS=Arabidopsis thaliana OX=3702 GN=NPF4.6 PE=1 SV=1	POT family;POT family	-	-	-	-	-	3.61	3.4	3.54	9.68	9.68	10.15	41.65	42.68	44.46	119.27	117.43	120.85
TR17956_c0_g1	PREDICTED: caffeic acid 3-O-methyltransferase 1 [Nelumbo nucifera]	Caffeic acid 3-O-methyltransferase OS=Rosa chinensis OX=74649 GN=COMT1 PE=2 SV=1	O-methyltransferase;Dimerisation domain	-	-	-	K13066|COMT; caffeic acid 3-O-methyltransferase / acetylserotonin O-methyltransferase [EC:2.1.1.68 2.1.1.4]	ko00380(Metabolism);ko00940(Metabolism);ko01100(Metabolism);ko01110(Metabolism)	3.59	3.67	3.26	1.36	1.37	1.94	4.33	4.46	4.87	1.37	1.28	0.78
TR14268_c0_g1	-	-	-	-	-	-	-	-	3.58	3.47	2.93	12.81	9.42	11.4	2.88	3.22	1.25	6.61	14.24	17.38
TR19064_c0_g2	hypothetical protein AQUCO_05600048v1 [Aquilegia coerulea]	Vignain OS=Vigna mungo OX=3915 PE=1 SV=1	Cathepsin propeptide inhibitor domain (I29)	-	-	-	-	-	3.49	1.95	2.96	0.16	0.22	0	3.74	3.23	2.09	0.28	0.2	0.28
TR20641_c0_g1	Disease resistance protein [Macleaya cordata]	Probable disease resistance protein At5g66910 OS=Arabidopsis thaliana OX=3702 GN=At5g66910 PE=2 SV=1	Arabidopsis broad-spectrum mildew resistance protein RPW8;NB-ARC domain	-	-	-	-	-	3.49	2.92	3.5	1.04	0.93	1.03	4.79	5.47	4.97	0.86	1.49	2.04
TR1741_c0_g1	Sieve element occlusion [Macleaya cordata]	Protein SIEVE ELEMENT OCCLUSION B OS=Arabidopsis thaliana OX=3702 GN=SEOB PE=1 SV=1	Sieve element occlusion C-terminus	-	-	-	-	-	3.45	3.88	4.21	0.65	0.68	0.66	3.56	2.68	2.47	1.15	1.08	1.25
TR62349_c0_g1	hypothetical protein AQUCO_02700181v1 [Aquilegia coerulea]	-	Embryo-specific protein 3, (ATS3)	-	-	-	-	-	3.45	3.66	1.86	0.38	0.37	0.38	3.38	1.71	3.41	0.28	0.36	0.29
TR17870_c0_g3	PREDICTED: LRR receptor-like serine/threonine-protein kinase GSO2 [Nelumbo nucifera]	Proline-rich receptor-like protein kinase PERK9 OS=Arabidopsis thaliana OX=3702 GN=PERK9 PE=1 SV=1	Protein tyrosine kinase;Protein kinase domain;Leucine rich repeat;Leucine Rich repeats (2 copies);Leucine rich repeat N-terminal domain;Leucine Rich Repeat	-	-	-	-	-	3.44	3.34	3.34	1.07	0.72	1.19	1.94	2.13	2.36	1.15	1	0.61
TR5394_c1_g1	Heat shock protein 70 family [Macleaya cordata]	Luminal-binding protein 1 (Fragment) OS=Nicotiana tabacum OX=4097 GN=BIP1 PE=2 SV=1	-	-	-	-	-	-	3.36	4.64	2.93	208.3	223.88	201.39	53.5	48.29	55.66	1.14	1.69	2.73
TR5058_c1_g1	PREDICTED: disease resistance protein RPM1-like isoform X1 [Vitis vinifera]|XP_019073717.1 PREDICTED: disease resistance protein RPM1-like isoform X2 [Vitis vinifera]	-	-	-	-	-	-	-	3.33	3.85	3.32	1.25	1.63	1.55	5.79	5.86	6.64	1.96	1.77	1.43
TR9358_c0_g1	PREDICTED: uncharacterized protein LOC104597668 [Nelumbo nucifera]|XP_010257668.1 PREDICTED: uncharacterized protein LOC104597668 [Nelumbo nucifera]|XP_010257676.1 PREDICTED: uncharacterized protein LOC104597668 [Nelumbo nucifera]|XP_010257687.1 PREDICTED: uncharacterized protein LOC104597668 [Nelumbo nucifera]	-	-	-	-	-	-	-	3.29	4.57	3.85	1.09	1.14	1.17	4.92	3.48	3.75	1.12	0.48	0.68
TR20793_c3_g1	PREDICTED: probable inactive purple acid phosphatase 16 [Nelumbo nucifera]	Probable inactive purple acid phosphatase 16 OS=Arabidopsis thaliana OX=3702 GN=PAP16 PE=2 SV=1	Calcineurin-like phosphoesterase	-	-	-	-	-	3.23	3.58	3.33	1.37	1.27	1.5	6.08	5.79	5.67	2.08	2.8	2.67
TR701_c1_g1	Disease resistance protein [Macleaya cordata]	Probable disease resistance protein At4g33300 OS=Arabidopsis thaliana OX=3702 GN=At4g33300 PE=2 SV=3	Leucine Rich repeats (2 copies)	-	-	-	-	-	3.2	2.71	2.55	0.69	0.31	0.39	15.04	14.9	14.64	0.78	0.64	0.43
TR1799_c2_g1	-	-	-	-	-	-	-	-	3.14	3.61	2.65	0.29	0.68	0.4	2.16	2	2.06	0.22	0.45	0.22
TR21331_c0_g1	hypothetical protein AQUCO_02200061v1 [Aquilegia coerulea]	Membrane protein PM19L OS=Oryza sativa subsp. japonica OX=39947 GN=PM19L PE=2 SV=1	AWPM-19-like family	-	-	-	-	-	3.05	3.39	3.04	0.31	0.55	0.19	2.52	3.19	3.25	0.46	0.59	0.39
TR6949_c0_g1	-	-	-	-	-	-	-	-	3.04	2.69	2.99	5.42	5.68	6.18	2.65	3.12	2.45	0.77	0.6	0.94
TR5449_c0_g1	Ankyrin repeat [Macleaya cordata]	-	Domain of unknown function;Ankyrin repeats (3 copies);Ankyrin repeats (many copies);Ankyrin repeat;Ankyrin repeats (many copies)	-	-	-	-	-	2.94	3.38	3.11	0.99	1.26	0.91	21.54	22.7	21.77	5.88	5.92	6.06
TR14145_c0_g1	Late embryogenesis abundant protein [Macleaya cordata]	-	Late embryogenesis abundant protein	-	-	-	-	-	2.91	2.92	3.4	0.11	0.15	0.23	3.06	2.88	1.94	0.48	0.37	0.68
TR54076_c0_g1	-	-	-	-	-	-	-	-	2.86	2.79	3.62	0.13	0.35	0.18	1.75	1.65	1.33	0.11	0.22	0
TR27615_c0_g1	PREDICTED: filament-like plant protein 7 [Nelumbo nucifera]|XP_010263479.1 PREDICTED: filament-like plant protein 7 [Nelumbo nucifera]|XP_019054072.1 PREDICTED: filament-like plant protein 7 [Nelumbo nucifera]	Filament-like plant protein 7 OS=Arabidopsis thaliana OX=3702 GN=FPP7 PE=3 SV=2	Filament-like plant protein, long coiled-coil	-	-	-	-	-	2.85	2.78	2.46	1.08	0.91	1.25	3.29	2.65	3.39	0.59	0.45	0.54
TR713_c6_g1	-	-	-	-	-	-	-	-	2.83	2.27	3.36	0.88	0.69	0.71	3.14	3.38	3.25	0.72	1.47	0.73
TR11161_c1_g2	PREDICTED: early nodulin-like protein 3 [Nelumbo nucifera]	Early nodulin-like protein 3 OS=Arabidopsis thaliana OX=3702 GN=At5g25090 PE=2 SV=2	Plastocyanin-like domain	-	-	-	-	-	2.8	3.47	3.2	0.1	0.66	0.27	3.24	2.76	3.35	0.42	0.49	0.26
TR1305_c0_g3	-	-	-	-	-	-	-	-	2.75	1.32	2.07	0.09	0.25	0.13	3.23	3.43	3.42	0.16	0.3	0.16
TR964_c0_g1	Protein kinase C-like [Macleaya cordata]	-	C1 domain;C1 domain	-	-	-	-	-	2.73	3.26	2.26	94.88	94.72	97.46	1.21	0.86	0.91	15.31	15.5	16.78
TR5938_c0_g1	hypothetical protein AQUCO_00400192v1 [Aquilegia coerulea]	Rho GTPase-activating protein 5 OS=Arabidopsis thaliana OX=3702 GN=ROPGAP5 PE=2 SV=1	-	-	-	-	-	-	2.71	2.85	2.46	0.05	0	0.08	1.45	1.48	1.97	0.19	0.05	0.19
TR574_c1_g1	hypothetical protein PHAVU_005G141800g [Phaseolus vulgaris]|ESW22294.1 hypothetical protein PHAVU_005G141800g [Phaseolus vulgaris]	Probable histone H2A.2 OS=Medicago truncatula OX=3880 GN=MtrDRAFT_AC149210g4v1 PE=3 SV=1	C-terminus of histone H2A;Core histone H2A/H2B/H3/H4	-	-	-	K11251|H2A; histone H2A	ko04217(Cellular Processes)	2.66	2.61	2.29	6.49	5.21	6.47	1.73	1.96	2.28	8.54	7.51	8.58
TR1545_c2_g1	PREDICTED: beta-galactosidase 8 [Nelumbo nucifera]	Beta-galactosidase 8 OS=Arabidopsis thaliana OX=3702 GN=BGAL8 PE=2 SV=2	Glycosyl hydrolases family 35;Galactose binding lectin domain;Beta-galactosidase	-	-	-	-	-	2.64	2.51	2.59	1.14	0.87	1.51	3.38	3.78	4.22	1.01	1.21	0.88
TR33608_c0_g2	Chain A, Betaine--homocysteine S-methyltransferase 1|1UMY_B Chain B, Betaine--homocysteine S-methyltransferase 1|1UMY_C Chain C, Betaine--homocysteine S-methyltransferase 1|1UMY_D Chain D, Betaine--homocysteine S-methyltransferase 1|AAH78811.1 Betaine-homocysteine methyltransferase [Rattus norvegicus]|EDM10062.1 rCG44400, isoform CRA_c [Rattus norvegicus]	-	Homocysteine S-methyltransferase	metabolic process;cellular protein modification process;nitrogen compound metabolic process;biological_process;protein alkylation;cellular process;protein metabolic process;methylation;protein modification process;macromolecule metabolic process;macromolecule modification;macromolecule methylation;cellular metabolic process;primary metabolic process;cellular macromolecule metabolic process;cellul…	molecular_function;binding;metal ion binding;ion binding;cation binding;transition metal ion binding;catalytic activity;methyltransferase activity;S-methyltransferase activity;S-adenosylmethionine-dependent methyltransferase activity;transferase activity;transferase activity, transferring one-carbon groups;zinc ion binding;betaine-homocysteine S-methyltransferase activity;S-adenosylmethionine-hom…	intracellular;cellular_component;extracellular region;extracellular space;cell;cytoplasm;vesicle;organelle;membrane-bounded organelle;extracellular organelle;extracellular region part;intracellular part;cytoplasmic part;cell part;extracellular vesicle;cytosol;extracellular exosome	K00547|mmuM, BHMT2; homocysteine S-methyltransferase [EC:2.1.1.10]	ko00270(Metabolism);ko01100(Metabolism);ko01110(Metabolism)	2.64	0.86	0.9	0.25	0.15	0.44	1.14	0.87	0.93	0.31	0.23	0.2
TR535_c1_g2	uncharacterized protein LOC110655803 isoform X1 [Hevea brasiliensis]	E3 ubiquitin-protein ligase WAV3 OS=Arabidopsis thaliana OX=3702 GN=WAV3 PE=1 SV=1	von Willebrand factor type A domain;von Willebrand factor type A domain;von Willebrand factor type A domain;RING-like zinc finger;Ring finger domain;VWA domain containing CoxE-like protein	-	-	-	-	-	2.64	2.41	2.48	5.49	5.35	5.49	13.33	13.27	10.98	55.93	54.26	57.69
TR16161_c0_g1	PREDICTED: xyloglucan endotransglucosylase/hydrolase protein 31-like [Gossypium arboreum]|KHG06305.1 putative xyloglucan endotransglucosylase/hydrolase 31 -like protein [Gossypium arboreum]	Probable xyloglucan endotransglucosylase/hydrolase protein 32 OS=Arabidopsis thaliana OX=3702 GN=XTH32 PE=2 SV=1	-	-	-	-	-	-	2.61	2.18	1.67	6.66	6.69	6.99	29.68	27.09	27.57	99.21	117.22	104.71
TR3989_c0_g1	PREDICTED: spermidine hydroxycinnamoyl transferase [Nelumbo nucifera]	Spermidine hydroxycinnamoyl transferase OS=Arabidopsis thaliana OX=3702 GN=SHT PE=1 SV=1	Transferase family	-	-	-	K13065|E2.3.1.133, HCT; shikimate O-hydroxycinnamoyltransferase [EC:2.3.1.133]	ko00940(Metabolism);ko00941(Metabolism);ko00945(Metabolism);ko01100(Metabolism);ko01110(Metabolism)	2.6	3.21	2.81	18.24	18.64	19.24	8.06	9.55	7.71	22.15	22.97	25.36
TR58507_c0_g1	carbamoyl-phosphate synthase [ammonia], mitochondrial precursor [Rattus norvegicus]|XP_017452081.1 PREDICTED: carbamoyl-phosphate synthase [ammonia], mitochondrial isoform X1 [Rattus norvegicus]|P07756.1 RecName: Full=Carbamoyl-phosphate synthase [ammonia], mitochondrial	Carbamoyl-phosphate synthase large chain, chloroplastic OS=Arabidopsis thaliana OX=3702 GN=CARB PE=1 SV=1	Carbamoyl-phosphate synthase L chain, ATP binding domain;Carbamoyl-phosphate synthase small chain, CPSase domain;Glutamine amidotransferase class-I;Carbamoyl-phosphate synthetase large chain, oligomerisation domain;ATP-grasp domain;MGS-like domain;D-ala D-ala ligase C-terminus;ATP-grasp in the biosynthetic pathway with Ter operon;ATP-grasp domain	metabolic process;nitrogen compound metabolic process;biological_process;biosynthetic process;cellular process;urea metabolic process;cellular nitrogen compound metabolic process;cellular amide metabolic process;amide biosynthetic process;cellular metabolic process;cellular biosynthetic process;cellular nitrogen compound biosynthetic process;small molecule metabolic process;organic substance meta…	molecular_function;binding;metal ion binding;ion binding;cation binding;catalytic activity;transferase activity;transferase activity, transferring one-carbon groups;carboxyl- or carbamoyltransferase activity;ligase activity;ligase activity, forming carbon-nitrogen bonds;carbon-nitrogen ligase activity, with glutamine as amido-N-donor;hydrolase activity;hydrolase activity, acting on carbon-nitroge…	intracellular;cellular_component;membrane;mitochondrion;cell;nucleus;cytoplasm;mitochondrial envelope;mitochondrial matrix;intracellular membrane-bounded organelle;nucleoid;organelle inner membrane;organelle membrane;mitochondrial membrane;organelle envelope;membrane-enclosed lumen;envelope;nuclear lumen;organelle;membrane-bounded organelle;non-membrane-bounded organelle;intracellular organelle;i…	K11541|URA2; carbamoyl-phosphate synthase / aspartate carbamoyltransferase [EC:6.3.5.5 2.1.3.2]	ko00240(Metabolism);ko00250(Metabolism);ko01100(Metabolism)	2.57	0.53	0.61	0.13	0.22	0.16	0.56	0.46	0.41	0.1	0.04	0.12
TR5636_c0_g1	probable xyloglucan endotransglucosylase/hydrolase protein 5 [Citrus clementina]|XP_006468946.1 probable xyloglucan endotransglucosylase/hydrolase protein 5 [Citrus sinensis]|ESR60107.1 hypothetical protein CICLE_v10016123mg [Citrus clementina]|KDO63481.1 hypothetical protein CISIN_1g022696mg [Citrus sinensis]|GAY61602.1 hypothetical protein CUMW_211240 [Citrus unshiu]	Xyloglucan endotransglucosylase/hydrolase 1 OS=Glycine max OX=3847 GN=XTH1 PE=2 SV=2	Glycosyl hydrolases family 16;Xyloglucan endo-transglycosylase (XET) C-terminus	-	-	-	-	-	2.55	3.11	3.89	17.83	17.41	17.45	5.06	5.11	5.61	37.04	33.9	36.24
TR4255_c0_g1	putative disease resistance protein [Cinnamomum micranthum f. kanehirae]	Disease resistance protein At4g27190 OS=Arabidopsis thaliana OX=3702 GN=At4g27190 PE=2 SV=1	NB-ARC domain;Leucine Rich repeats (2 copies);Leucine rich repeat;AAA domain	-	-	-	K13459|RPS2; disease resistance protein RPS2	ko04626(Organismal Systems)	2.53	2.17	2.92	1.22	1.05	0.93	3.09	3.16	3.32	1.62	1.23	1.11
TR15058_c0_g1	sarcoplasmic/endoplasmic reticulum calcium ATPase 2 isoform a [Rattus norvegicus]|CAA33645.1 sarcoplasmic reticulum 2+-Ca-ATPase [Rattus norvegicus]|AAA40786.1 non-muscle ATPase [Rattus norvegicus]	Calcium-transporting ATPase 3, endoplasmic reticulum-type OS=Arabidopsis thaliana OX=3702 GN=ECA3 PE=2 SV=3	E1-E2 ATPase;Cation transporting ATPase, C-terminus;Cation transport ATPase (P-type);haloacid dehalogenase-like hydrolase;Cation transporter/ATPase, N-terminus	system process;circulatory system process;heart process;blood circulation;regulation of heart contraction;biological_process;multicellular organismal process;regulation of system process;regulation of biological process;regulation of multicellular organismal process;heart contraction;biological regulation;regulation of biological quality;regulation of blood circulation;signal transduction;cell co…	molecular_function;binding;metal ion binding;ion binding;cation binding;nucleotide binding;drug binding;purine nucleotide binding;adenyl nucleotide binding;ribonucleotide binding;purine ribonucleotide binding;adenyl ribonucleotide binding;purine ribonucleoside triphosphate binding;small molecule binding;anion binding;organic cyclic compound binding;carbohydrate derivative binding;nucleoside phosp…	plasma membrane;intracellular;cellular_component;integral component of membrane;extrinsic component of membrane;membrane;cell;cytoplasm;endoplasmic reticulum;endoplasmic reticulum membrane;intracellular membrane-bounded organelle;cell-cell junction;cytoplasmic side of plasma membrane;endomembrane system;sarcoplasm;sarcoplasmic reticulum;extrinsic component of plasma membrane;cell junction;organel…	K05853|ATP2A; P-type Ca2+ transporter type 2A [EC:7.2.2.10]	ko04020(Environmental Information Processing);ko04022(Environmental Information Processing);ko04024(Environmental Information Processing);ko04260(Organismal Systems);ko04261(Organismal Systems);ko04919(Organismal Systems);ko04972(Organismal Systems)	2.5	1.32	1.27	0.32	0.39	0.44	1.04	0.85	0.93	0.14	0.17	0.14
TR4504_c0_g1	PREDICTED: aspartic proteinase PCS1 [Nelumbo nucifera]	Aspartic proteinase PCS1 OS=Arabidopsis thaliana OX=3702 GN=PCS1 PE=2 SV=1	Xylanase inhibitor N-terminal;Xylanase inhibitor C-terminal;Eukaryotic aspartyl protease	-	-	-	-	-	2.45	2.21	3.05	6.02	5.37	5.98	22.16	24.64	24.2	61.62	61.19	55.09
TR7155_c0_g2	putative disease resistance protein RGA1 [Cinnamomum micranthum f. kanehirae]	-	Leucine Rich repeats (2 copies)	-	-	-	-	-	2.42	1.31	1.76	5.17	5.27	7.34	1.23	2.12	1.55	0.18	0.26	0.27
TR14984_c0_g1	Sieve element occlusion [Macleaya cordata]	Protein SIEVE ELEMENT OCCLUSION B OS=Arabidopsis thaliana OX=3702 GN=SEOB PE=1 SV=1	Sieve element occlusion N-terminus	-	-	-	-	-	2.39	3.06	2.23	0.27	0.15	0.49	2.17	2.17	2.14	0.52	0.38	0.47
TR24834_c0_g1	PREDICTED: molybdate transporter 2 [Nelumbo nucifera]	Molybdate transporter 2 OS=Arabidopsis thaliana OX=3702 GN=MOT2 PE=1 SV=2	Molybdate transporter of MFS superfamily	-	-	-	-	-	2.39	2.59	2.32	7.62	7.96	7.9	1.96	2.15	1.46	6.04	6.59	6.66
TR79096_c0_g1	apolipoprotein B-100 precursor [Rattus norvegicus]	-	Apolipoprotein B100 C terminal	-	-	-	-	-	2.39	0.41	0.53	0.13	0.15	0.15	0.56	0.39	0.37	0.07	0.09	0.1
TR3463_c0_g1	PREDICTED: GDSL esterase/lipase At5g03980-like [Nelumbo nucifera]	Acetylajmalan esterase OS=Rauvolfia serpentina OX=4060 GN=AAE PE=1 SV=1	GDSL-like Lipase/Acylhydrolase	-	-	-	-	-	2.37	2.21	2.81	0.65	0.65	0.64	4.4	4.86	3.91	0.86	1.19	0.76
TR2062_c1_g1	long-chain-fatty-acid--CoA ligase 1 [Rattus norvegicus]|XP_006253184.1 PREDICTED: long-chain-fatty-acid--CoA ligase 1 isoform X1 [Rattus norvegicus]|XP_006253185.1 PREDICTED: long-chain-fatty-acid--CoA ligase 1 isoform X1 [Rattus norvegicus]|XP_006253186.1 PREDICTED: long-chain-fatty-acid--CoA ligase 1 isoform X1 [Rattus norvegicus]|XP_006253187.1 PREDICTED: long-chain-fatty-acid--CoA ligase 1 is…	Long chain acyl-CoA synthetase 7, peroxisomal OS=Arabidopsis thaliana OX=3702 GN=LACS7 PE=1 SV=2	AMP-binding enzyme	metabolic process;organic acid metabolic process;lipid metabolic process;fatty acid metabolic process;biological_process;cellular process;carboxylic acid metabolic process;monocarboxylic acid metabolic process;oxoacid metabolic process;cellular metabolic process;primary metabolic process;cellular lipid metabolic process;small molecule metabolic process;organic substance metabolic process;neutral …	molecular_function;catalytic activity;CoA-ligase activity;ligase activity;ligase activity, forming carbon-sulfur bonds;acid-thiol ligase activity;fatty acid ligase activity;nucleotide binding;binding;drug binding;purine nucleotide binding;adenyl nucleotide binding;ribonucleotide binding;purine ribonucleotide binding;adenyl ribonucleotide binding;purine ribonucleoside triphosphate binding;small mo…	intracellular;cellular_component;membrane;mitochondrion;peroxisome;cell;cytoplasm;mitochondrial envelope;peroxisomal part;endoplasmic reticulum;intracellular membrane-bounded organelle;endomembrane system;outer membrane;organelle membrane;intrinsic component of membrane;microbody membrane;mitochondrial membrane;organelle envelope;organelle outer membrane;envelope;organelle subcompartment;nuclear …	K01897|ACSL, fadD; long-chain acyl-CoA synthetase [EC:6.2.1.3]	ko00061(Metabolism);ko00071(Metabolism);ko01100(Metabolism);ko01212(Metabolism);ko02024(Cellular Processes);ko03320(Organismal Systems);ko04146(Cellular Processes);ko04216(Cellular Processes);ko04714(Organismal Systems);ko04920(Organismal Systems)	2.23	0.64	0.54	0.08	0.09	0.13	0.43	0.38	0.45	0.09	0.1	0.07
TR84285_c0_g1	hypothetical protein MIMGU_mgv1a008019mg [Erythranthe guttata]|EYU22382.1 hypothetical protein MIMGU_mgv1a008019mg [Erythranthe guttata]	Heparanase-like protein 2 OS=Arabidopsis thaliana OX=3702 GN=At5g61250 PE=2 SV=1	-	-	-	-	-	-	2.23	2.57	2.47	9.16	14.71	10.74	5.9	5.33	6.3	14.96	14.53	15.64
TR61500_c0_g2	-	-	-	-	-	-	-	-	2.21	4.48	4.54	154.5	138.88	159.4	25.24	34.68	50.19	9.78	1.67	7.37
TR7484_c0_g1	hypothetical protein AQUCO_03700134v1 [Aquilegia coerulea]	Trehalose-phosphate phosphatase B OS=Arabidopsis thaliana OX=3702 GN=TPPB PE=1 SV=1	Trehalose-phosphatase;Trehalose-phosphatase	-	-	-	K01087|otsB; trehalose 6-phosphate phosphatase [EC:3.1.3.12]	ko00500(Metabolism);ko01100(Metabolism);ko01110(Metabolism)	2.15	2.21	1.87	0.33	0.31	0.58	1.16	1.1	0.97	0.22	0.35	0.32
TR923_c1_g1	Protein kinase domain [Macleaya cordata]	Cysteine-rich receptor-like protein kinase 41 OS=Arabidopsis thaliana OX=3702 GN=CRK41 PE=3 SV=2	-	-	-	-	-	-	2.11	2.32	1.32	3.78	4.51	4.29	8.85	9.31	8.62	3.27	3.31	3.06
TR36961_c1_g1	PREDICTED: protein ABHD11 [Nelumbo nucifera]	Polyubiquitin 10 OS=Arabidopsis thaliana OX=3702 GN=UBQ10 PE=2 SV=2	-	-	-	-	K08770|UBC; ubiquitin C	ko03320(Organismal Systems);ko04120(Genetic Information Processing);ko04137(Cellular Processes)	2.09	3.9	1.23	48.94	52.8	54.67	164.5	190.91	155.02	10.77	17.56	19.97
TR43834_c0_g1	early nodulin-like protein 3 [Cinnamomum micranthum f. kanehirae]	Early nodulin-like protein 3 OS=Arabidopsis thaliana OX=3702 GN=At5g25090 PE=2 SV=2	Plastocyanin-like domain	-	-	-	-	-	2.08	1.12	2.42	0.12	0	0.11	1.34	1.67	1.16	0.21	0.26	0.21
TR21332_c0_g1	vignain-like [Quercus suber]	Vignain OS=Ricinus communis OX=3988 GN=CYSEP PE=1 SV=1	Papain family cysteine protease	-	-	-	-	-	2.04	3.02	3.69	0.5	0.4	0.14	2.47	3.32	2.15	0.35	0.08	0
TR25729_c0_g2	-	-	-	-	-	-	-	-	2.04	2.7	1.39	0.35	0.12	0.12	1.77	2.32	2.19	0	0	0.16
TR14167_c0_g1	2,3-bisphosphoglycerate-independent phosphoglycerate mutase [Sesamum indicum]|XP_011100488.1 2,3-bisphosphoglycerate-independent phosphoglycerate mutase [Sesamum indicum]|XP_011100489.1 2,3-bisphosphoglycerate-independent phosphoglycerate mutase [Sesamum indicum]|XP_020554998.1 2,3-bisphosphoglycerate-independent phosphoglycerate mutase [Sesamum indicum]	2,3-bisphosphoglycerate-independent phosphoglycerate mutase OS=Mesembryanthemum crystallinum OX=3544 GN=PGM1 PE=2 SV=1	Metalloenzyme superfamily	-	-	-	-	-	1.99	2.6	3.09	0.76	0.8	0.63	3.63	3.66	3.69	0.86	1.24	1.73
TR56708_c0_g1	hypothetical protein CICLE_v10030623mg [Citrus clementina]	Receptor-like protein 9DC3 OS=Solanum pimpinellifolium OX=4084 GN=9DC3 PE=3 SV=1	Leucine rich repeat;Leucine Rich repeats (2 copies);Leucine Rich Repeat;Leucine Rich repeat	-	-	-	-	-	1.99	3.19	2.26	19.78	19.16	20.87	2.98	3.81	2.44	5.52	6.44	6.75
TR9076_c0_g2	Glyoxalase-like domain [Macleaya cordata]	-	-	-	-	-	-	-	1.98	2.75	1.79	17.67	16.99	17.25	51.35	55.6	57.34	5.54	4.88	5.54
TR1300_c1_g1	-	-	-	-	-	-	-	-	1.97	2.28	1.47	13.21	12.8	12.6	2.79	2.13	2.83	17.99	19.06	19.48
TR8069_c0_g1	hypothetical protein AQUCO_07400057v1 [Aquilegia coerulea]	Protein DETOXIFICATION 16 OS=Arabidopsis thaliana OX=3702 GN=DTX16 PE=2 SV=1	MatE	-	-	-	-	-	1.95	2.09	1.78	4.55	4.3	4.29	1.07	1.18	1.25	2.47	2.3	2.22
TR13481_c0_g1	PREDICTED: LOW QUALITY PROTEIN: uncharacterized protein LOC103585542 [Galeopterus variegatus]	-	-	-	-	-	-	-	1.91	0.27	0.5	0.12	0.09	0.06	0.33	0.25	0.36	0.04	0.04	0.1
TR47093_c0_g1	zinc finger protein [Macleaya cordata]	Zinc finger CCCH domain-containing protein 20 OS=Arabidopsis thaliana OX=3702 GN=At2g19810 PE=2 SV=1	Zinc finger C-x8-C-x5-C-x3-H type (and similar)	-	-	-	-	-	1.89	1.44	2.02	0.35	0.31	0.28	6.22	5.91	5.47	0.56	0.75	0.52
TR7292_c0_g1	PREDICTED: probable aspartyl protease At4g16563 [Juglans regia]	Probable aspartyl protease At4g16563 OS=Arabidopsis thaliana OX=3702 GN=At4g16563 PE=2 SV=1	Xylanase inhibitor C-terminal;Xylanase inhibitor N-terminal;Eukaryotic aspartyl protease	-	-	-	-	-	1.86	1.71	2.24	0.41	0.52	0.55	3.51	3.28	3.17	1.05	1.63	1.29
TR131_c0_g1	Leucine-rich repeat [Macleaya cordata]	Plant intracellular Ras-group-related LRR protein 4 OS=Arabidopsis thaliana OX=3702 GN=PIRL4 PE=1 SV=1	Leucine rich repeat;Leucine Rich repeats (2 copies)	-	-	-	-	-	1.81	1.81	1.93	7.84	7.25	8.34	2.28	2.46	3.17	6.88	7.81	7.56
TR16131_c0_g1	-	-	-	-	-	-	-	-	1.77	1.76	1.74	0.02	0.08	0	1.25	0.9	0.82	0.13	0	0.06
TR7483_c0_g1	hypothetical protein TanjilG_15164 [Lupinus angustifolius]	-	Leucine rich repeat;Leucine Rich repeats (2 copies);Leucine Rich Repeat;Leucine Rich repeat	-	-	-	-	-	1.73	1.96	2.27	0.76	0.9	0.83	2.27	2.72	2.94	0.43	0.52	0.63
TR9299_c0_g1	-	-	-	-	-	-	-	-	1.69	1.69	1.78	0.55	0.38	0.39	1.29	1.4	1.83	0.43	0.46	0.24
TR1736_c1_g1	-	-	-	-	-	-	-	-	1.67	1.61	0.89	4.49	4.11	3.51	1.86	1.91	1.91	0.3	0.14	0.4
TR2497_c0_g1	-	-	-	-	-	-	-	-	1.64	1.89	1.1	4.8	4.86	4.13	16.34	17.98	19.87	5.35	5	5.16
TR497_c0_g1	Transposon Tf2-2 polyprotein [Vitis vinifera]	-	-	-	-	-	-	-	1.56	2	1.79	0.35	0.53	0.38	1.54	1.44	1.7	6.26	6.73	6.29
TR11242_c0_g1	PREDICTED: uncharacterized protein LOC109505137 [Elaeis guineensis]	-	-	-	-	-	-	-	1.51	1.09	1.05	0.25	0.2	0.07	1.53	2.32	1.3	0.09	0.12	0.43
TR11977_c0_g1	-	-	-	-	-	-	-	-	1.5	1.93	1.99	6.92	5.46	6.25	0.87	2.17	1.63	8.66	8.83	11.2
TR14452_c0_g1	PREDICTED: peroxidase 42-like [Nelumbo nucifera]	Peroxidase 42 OS=Arabidopsis thaliana OX=3702 GN=PER42 PE=1 SV=2	Peroxidase;Peroxidase	-	-	-	K00430|E1.11.1.7; peroxidase [EC:1.11.1.7]	ko00940(Metabolism);ko01100(Metabolism);ko01110(Metabolism)	1.48	1.58	1.61	0.22	0.27	0.14	2.36	3.85	2.54	0.13	0.06	0.31
TR25791_c0_g1	-	-	-	-	-	-	-	-	1.48	1.03	0.67	0.05	0	0.07	1.26	1.19	1.07	0	0.09	0.18
TR32036_c0_g1	Aspartyl/Asparaginyl-tRNA synthetase [Macleaya cordata]	Asparagine--tRNA ligase, cytoplasmic 2 OS=Arabidopsis thaliana OX=3702 GN=SYNC2 PE=1 SV=2	tRNA synthetases class II (D, K and N)	-	-	-	K01893|NARS, asnS; asparaginyl-tRNA synthetase [EC:6.1.1.22]	ko00970(Genetic Information Processing)	1.42	1.59	1.81	0.59	0.51	0.55	1.31	1.13	1.65	0.69	0.48	0.48
TR1463_c0_g4	Pectin lyase-like superfamily protein isoform 1 [Theobroma cacao]	Polygalacturonase QRT3 OS=Arabidopsis thaliana OX=3702 GN=QRT3 PE=2 SV=1	Pectate lyase superfamily protein	-	-	-	-	-	1.4	1.69	0.95	2.69	2.97	2.26	9.32	9.8	9.49	4.82	3.94	3.66
TR20698_c0_g1	hypothetical protein AQUCO_04100087v1 [Aquilegia coerulea]	Reticulon-like protein B9 OS=Arabidopsis thaliana OX=3702 GN=RTNLB9 PE=2 SV=1	Reticulon	-	-	-	-	-	1.31	1.84	1.89	0.17	0.12	0.18	2.06	2.05	2.2	0.3	0.5	0.45
TR6200_c0_g1	Pseudouridine synthase [Macleaya cordata]	RNA pseudouridine synthase 1 OS=Oryza sativa subsp. japonica OX=39947 GN=Os12g0560500 PE=2 SV=1	RNA pseudouridylate synthase	-	-	-	-	-	1.28	1.1	1.75	3.63	3.64	4.19	1.94	1.79	1.35	5.74	5.23	5.41
TR36_c3_g1	-	-	-	-	-	-	-	-	1.27	1.72	1.67	5.67	5.42	3.35	0.89	1.51	1.39	0.08	0.08	0
TR16096_c0_g1	hypothetical protein AQUCO_00200146v1 [Aquilegia coerulea]	-	-	-	-	-	-	-	1.25	1.32	1.38	0.05	0.07	0	1.29	1.43	1.8	0.09	0.13	0
TR8013_c0_g1	hypothetical protein AQUCO_02700066v1 [Aquilegia coerulea]	L-type lectin-domain containing receptor kinase IV.2 OS=Arabidopsis thaliana OX=3702 GN=LECRK42 PE=2 SV=1	Legume lectin domain;Protein kinase domain;Protein tyrosine kinase	-	-	-	-	-	1.22	1.08	1.08	5.42	5.22	5.5	1.63	1.58	1.09	0.44	0.45	0.5
TR106041_c0_g1	agglutinin-like isoform X2 [Quercus suber]	Agglutinin OS=Castanea crenata OX=103480 PE=1 SV=1	Jacalin-like lectin domain	-	-	-	-	-	1.21	1.09	1.31	0.07	0.1	0.05	0.65	0.77	0.93	0.06	0.09	0
TR120322_c0_g1	PREDICTED: serine carboxypeptidase-like 20 [Juglans regia]	Serine carboxypeptidase-like 20 OS=Arabidopsis thaliana OX=3702 GN=SCPL20 PE=2 SV=2	Serine carboxypeptidase	-	-	-	-	-	1.19	1.03	1.14	0.04	0.12	0.19	1.14	0.82	0.78	0.08	0.07	0
TR45456_c0_g1	IGFBP5 protein, partial [Homo sapiens]	-	-	-	-	-	-	-	1.18	0.29	0.19	0.08	0.15	0.11	1.02	0.69	0.13	0.12	0.03	0.05
TR227_c1_g2	-	-	-	-	-	-	-	-	1.17	1.1	1.2	12.32	10.29	13.2	0.6	0.25	0.09	1.36	1	2.2
TR4114_c0_g1	HAD-superfamily hydrolase [Macleaya cordata]	Acyl transferase 4 OS=Oryza sativa subsp. japonica OX=39947 GN=AT4 PE=1 SV=1	5' nucleotidase family;Transferase family	-	-	-	-	-	1.17	1.58	1.28	0.29	0.18	0.25	0.73	0.76	1.06	5.43	5.26	5.65
TR4436_c0_g1	PREDICTED: galactinol synthase 1 [Vitis vinifera]|ARS22083.1 galactinol synthase [Vitis vinifera]|RVW43445.1 Galactinol synthase 1 [Vitis vinifera]	Galactinol synthase 1 OS=Ajuga reptans OX=38596 GN=GOLS1 PE=1 SV=1	Glycosyl transferase family 8	-	-	-	K18819|GOLS; inositol 3-alpha-galactosyltransferase [EC:2.4.1.123]	ko00052(Metabolism);ko01100(Metabolism)	1.16	1.69	1.05	0.08	0	0.22	1.6	2.3	2.45	0.18	0	0
TR7924_c1_g1	Protein kinase domain [Macleaya cordata]	Probable LRR receptor-like serine/threonine-protein kinase At1g12460 OS=Arabidopsis thaliana OX=3702 GN=At1g12460 PE=2 SV=1	Protein kinase domain;Protein tyrosine kinase;Leucine Rich repeats (2 copies);Leucine rich repeat;Leucine Rich Repeat;Leucine rich repeat N-terminal domain	-	-	-	-	-	1.15	0.98	0.97	0.22	0.33	0.27	0.84	0.91	0.8	0.23	0.36	0.25
TR2442_c2_g1	hypothetical protein AQUCO_11000037v1 [Aquilegia coerulea]	-	-	-	-	-	-	-	1.13	0.71	1.04	7.23	7.52	9.21	21.36	20.47	22.43	145.21	145.36	141.61
TR2316_c0_g1	-	-	-	-	-	-	-	-	1.12	1.83	2.32	0.03	0.08	0.16	0.64	0.74	0.67	2.87	4.11	2.99
TR3105_c0_g2	Glycoside hydrolase [Macleaya cordata]	Probable beta-D-xylosidase 6 OS=Arabidopsis thaliana OX=3702 GN=BXL6 PE=2 SV=1	Glycosyl hydrolase family 3 C-terminal domain	-	-	-	-	-	1.09	0.68	1.04	0.2	0.22	0.19	1.09	1.09	1.31	0.12	0.08	0.2
TR31728_c0_g1	-	-	-	-	-	-	-	-	1.08	1.64	1.35	0.19	0.16	0.26	1.03	1.5	1.18	0.16	0.1	0.04
TR18714_c0_g1	Alcohol dehydrogenase superfamily [Macleaya cordata]	Alcohol dehydrogenase-like 3 OS=Arabidopsis thaliana OX=3702 GN=At1g32780 PE=2 SV=1	Alcohol dehydrogenase GroES-like domain;Zinc-binding dehydrogenase	-	-	-	K00121|frmA, ADH5, adhC; S-(hydroxymethyl)glutathione dehydrogenase / alcohol dehydrogenase [EC:1.1.1.284 1.1.1.1]	ko00010(Metabolism);ko00071(Metabolism);ko00350(Metabolism);ko00620(Metabolism);ko00625(Metabolism);ko00626(Metabolism);ko00680(Metabolism);ko00830(Metabolism);ko00980(Metabolism);ko00982(Metabolism);ko01100(Metabolism);ko01110(Metabolism);ko01120(Metabolism);ko01200(Metabolism);ko01220(Metabolism)	1.06	1.37	1.05	4.78	4.9	4.45	1.47	1.41	1.49	6.18	6.77	6.34
TR16540_c0_g1	Glycoside hydrolase [Macleaya cordata]	Glucan endo-1,3-beta-glucosidase OS=Triticum aestivum OX=4565 GN=GLC1 PE=2 SV=1	Glycosyl hydrolases family 17;X8 domain	-	-	-	-	-	1.05	0.87	0.81	0.05	0.07	0.04	0.73	0.97	1.41	0.18	0.13	0.18
TR37479_c0_g1	PREDICTED: receptor protein kinase CLAVATA1 [Vitis vinifera]	Receptor protein kinase CLAVATA1 OS=Arabidopsis thaliana OX=3702 GN=CLV1 PE=1 SV=3	Protein tyrosine kinase;Protein kinase domain;Leucine rich repeat;Leucine Rich repeats (2 copies);Leucine Rich Repeat;Leucine rich repeat N-terminal domain;Leucine Rich repeat	-	-	-	-	-	1.03	1.43	1.57	0.54	0.49	0.65	1.33	1.53	1.56	0.23	0.3	0.28
TR1988_c0_g1	Pentatricopeptide repeat [Macleaya cordata]	Pentatricopeptide repeat-containing protein At5g27460 OS=Arabidopsis thaliana OX=3702 GN=At5g27460 PE=2 SV=1	PPR repeat;PPR repeat;PPR repeat family	-	-	-	-	-	0.97	0.94	1.24	3.31	2.98	2.66	0.69	0.72	1.76	2.46	2.49	2.29
TR24787_c1_g1	Protein of unknown function DUF247 [Macleaya cordata]	UPF0481 protein At3g47200 OS=Arabidopsis thaliana OX=3702 GN=At3g47200 PE=2 SV=1	Plant protein of unknown function	-	-	-	-	-	0.95	1.12	0.85	0.11	0.12	0.32	0.84	1.16	0.96	0.05	0.1	0.05
TR7720_c0_g1	Sucrose synthase [Macleaya cordata]	Sucrose synthase 6 OS=Arabidopsis thaliana OX=3702 GN=SUS6 PE=1 SV=1	Sucrose synthase;Glycosyl transferases group 1;Glycosyl transferases group 1	-	-	-	K00695|SUS; sucrose synthase [EC:2.4.1.13]	ko00500(Metabolism);ko01100(Metabolism);ko01110(Metabolism)	0.95	0.99	1.16	0.11	0.09	0.15	1.3	1.41	1.2	0.24	0.23	0.21
TR1782_c0_g1	-	-	-	-	-	-	-	-	0.9	0.62	0.3	3.07	4.07	3.56	17.56	18.32	21.01	48.11	47.78	45.07
TR13733_c2_g2	-	-	-	-	-	-	-	-	0.88	0	0.79	20.06	17.74	19.47	0.8	0.39	1.06	5.88	4.48	3.25
TR9561_c0_g1	bidirectional sugar transporter SWEET17 [Herrania umbratica]	Bidirectional sugar transporter SWEET17 OS=Arabidopsis thaliana OX=3702 GN=SWEET17 PE=1 SV=2	Sugar efflux transporter for intercellular exchange	-	-	-	-	-	0.88	0.82	0.79	0.06	0.08	0.15	3.25	2.29	2.4	0.25	0.21	0.45
TR4299_c11_g1	-	-	-	-	-	-	-	-	0.85	0.77	0.99	6.48	6.41	6.37	2.16	2.31	2.18	0.25	0.36	0.63
TR115076_c0_g1	PREDICTED: titin isoform X2 [Rattus norvegicus]	-	Immunoglobulin I-set domain;Immunoglobulin domain;Immunoglobulin domain;Immunoglobulin domain;Immunoglobulin V-set domain;CD80-like C2-set immunoglobulin domain;Natural killer cell receptor 2B4;Immunoglobulin C1-set domain;Ig-like domain on T-cell surface glycoprotein CD3 epsilon chain	-	-	-	-	-	0.78	0.74	0.64	0.15	0.08	0.26	0.56	0.54	0.52	0.1	0.14	0.04
TR1875_c3_g2	NAC domain [Macleaya cordata]	NAC domain-containing protein 73 OS=Arabidopsis thaliana OX=3702 GN=NAC073 PE=2 SV=1	-	-	-	-	-	-	0.78	0.93	0.85	5.46	5.38	5.25	2.24	2.61	2.13	0.5	0.55	0.51
TR44289_c0_g2	-	-	-	-	-	-	-	-	0.78	1.05	1.64	0.17	0	0	1.15	1.63	1.19	0.07	0.29	0
TR1628_c0_g2	Protein kinase domain [Macleaya cordata]	Protein STRUBBELIG-RECEPTOR FAMILY 8 OS=Arabidopsis thaliana OX=3702 GN=SRF8 PE=2 SV=1	Protein kinase domain;Protein tyrosine kinase;Leucine rich repeat;Leucine rich repeat N-terminal domain;Leucine Rich repeats (2 copies)	-	-	-	-	-	0.75	0.54	0.68	0.07	0.02	0.14	2.24	2.02	1.71	0.1	0.12	0.13
TR25083_c0_g1	-	-	-	-	-	-	-	-	0.72	1.46	1.75	12.91	15.92	11.89	1.76	1.02	1.47	8.28	7.59	8.17
TR1545_c1_g1	D-galactoside/L-rhamnose binding SUEL lectin domain [Macleaya cordata]	Beta-galactosidase 15 OS=Arabidopsis thaliana OX=3702 GN=BGAL15 PE=2 SV=1	Glycosyl hydrolases family 35;Galactose binding lectin domain;Beta-galactosidase;Beta-galactosidase jelly roll domain	-	-	-	-	-	0.71	0.73	0.7	2.59	3.03	3.14	11.35	12.18	11.14	41.55	43.99	42.33
TR28043_c0_g1	Microtubule-associated protein [Macleaya cordata]	65-kDa microtubule-associated protein 1 OS=Arabidopsis thaliana OX=3702 GN=MAP65-1 PE=1 SV=1	Microtubule associated protein (MAP65/ASE1 family)	-	-	-	-	-	0.71	1.36	1.27	0.3	0.23	0.36	0.76	0.84	1.1	0.16	0.09	0.16
TR2096_c0_g1	PREDICTED: protein LURP-one-related 8-like [Nelumbo nucifera]	Protein LURP-one-related 8 OS=Arabidopsis thaliana OX=3702 GN=At2g38640 PE=2 SV=1	LURP-one-related	-	-	-	-	-	0.69	0.84	1.38	3.32	3.32	3.22	18.18	19.05	20.61	57.21	55.37	57.62
TR21165_c0_g1	hypothetical protein AQUCO_00700912v1 [Aquilegia coerulea]	Amino acid transporter AVT3B OS=Arabidopsis thaliana OX=3702 GN=AVT3B PE=2 SV=1	-	-	-	-	-	-	0.69	0	0.9	36.5	29.73	21.52	3.74	3.17	2.55	21.91	16.21	17.72
TR13827_c0_g1	hypothetical protein AQUCO_00700772v1 [Aquilegia coerulea]	Probable LRR receptor-like serine/threonine-protein kinase At4g37250 OS=Arabidopsis thaliana OX=3702 GN=At4g37250 PE=2 SV=1	Protein kinase domain;Protein tyrosine kinase;Leucine Rich repeats (2 copies);Leucine rich repeat;Leucine rich repeat N-terminal domain;Leucine Rich Repeat	-	-	-	-	-	0.68	0.69	0.94	0.17	0.27	0.21	2.19	1.79	2.04	0.4	0.3	0.32
TR10406_c0_g1	GYF [Macleaya cordata]	-	-	-	-	-	-	-	0.64	0.52	0.93	8.53	12.61	8.14	1.61	0.76	2.15	6.08	6.05	6.47
TR32124_c0_g2	Cupin 1 [Macleaya cordata]	Vicilin-like seed storage protein At2g18540 OS=Arabidopsis thaliana OX=3702 GN=At2g18540 PE=3 SV=1	Cupin;Cupin domain;Cupin;Cupin domain	-	-	-	-	-	0.64	0.83	0.91	0.26	0.2	0.31	13.92	13.99	13.11	0.31	0.32	0.23
TR3333_c1_g1	Lipase [Macleaya cordata]	GDSL esterase/lipase At1g28590 OS=Arabidopsis thaliana OX=3702 GN=At1g28590 PE=2 SV=2	-	-	-	-	-	-	0.64	0.6	0.78	1.83	2.08	1.96	1.01	0.78	1.01	1.99	1.66	1.96
TR14074_c1_g2	-	-	-	-	-	-	-	-	0.63	0.55	0.49	3.85	4.16	3.26	0.21	0.26	0.33	1.17	1.25	1.16
TR48818_c0_g1	Amino acid/polyamine transporter I [Macleaya cordata]	Amino-acid permease BAT1 homolog OS=Oryza sativa subsp. japonica OX=39947 GN=BAT1 PE=2 SV=1	Amino acid permease;Amino acid permease	-	-	-	-	-	0.62	0.54	0.73	2.85	2.19	2.78	0.62	0.5	0.11	2.17	2.2	1.28
TR7200_c0_g1	PREDICTED: uncharacterized endoplasmic reticulum membrane protein C16E8.02-like [Nelumbo nucifera]	-	Protein of unknown function (DUF962);Protein of unknown function (DUF962)	-	-	-	-	-	0.59	0.8	0.72	2.69	2.14	2.18	14.08	16.35	15.93	2.05	2.58	2.82
TR23193_c0_g1	-	-	-	-	-	-	-	-	0.57	0.49	0.42	1.84	1.34	1.11	4.06	3.56	4.39	17.94	18.59	18.39
TR7204_c1_g1	-	-	-	-	-	-	-	-	0.57	0.76	0.8	2.98	3.25	3.68	2.16	1.54	1.2	0.4	0.36	0.54
TR86983_c0_g1	Sieve element occlusion [Macleaya cordata]	Protein SIEVE ELEMENT OCCLUSION B OS=Arabidopsis thaliana OX=3702 GN=SEOB PE=1 SV=1	Sieve element occlusion N-terminus;Sieve element occlusion C-terminus	-	-	-	-	-	0.54	0.72	0.95	0.09	0.12	0.07	1.51	2.02	1.78	0.06	0.01	0.06
TR2604_c0_g1	Basic-leucine zipper domain [Macleaya cordata]	G-box-binding factor 2 OS=Arabidopsis thaliana OX=3702 GN=GBF2 PE=1 SV=1	-	-	-	-	-	-	0.48	0.73	0.75	1.67	2.17	2	4.21	4.77	4.62	0.98	1.02	0.99
TR53069_c0_g1	serine carboxypeptidase-like 13 isoform X1 [Helianthus annuus]|OTF96520.1 putative serine carboxypeptidase-like 9 [Helianthus annuus]	Serine carboxypeptidase-like 8 OS=Arabidopsis thaliana OX=3702 GN=SCPL8 PE=1 SV=2	-	-	-	-	-	-	0.47	0.95	1.43	12.64	10.74	8.34	1.16	1.54	0.28	6.04	6.93	3.18
TR778_c2_g1	PREDICTED: HIPL1 protein-like [Musa acuminata subsp. malaccensis]	HIPL1 protein OS=Arabidopsis thaliana OX=3702 GN=HIPL1 PE=3 SV=2	-	-	-	-	-	-	0.46	0.17	0.53	6.16	7.58	5.96	1.73	2.53	2.05	0.33	0.27	0.08
TR7250_c0_g1	protein CUP-SHAPED COTYLEDON 2-like [Coffea arabica]	Protein CUP-SHAPED COTYLEDON 2 OS=Arabidopsis thaliana OX=3702 GN=NAC098 PE=1 SV=1	No apical meristem (NAM) protein	-	-	-	-	-	0.41	0.31	0.42	2.73	2.65	1.77	6.09	7.23	5.56	2.57	2.54	2.88
TR17041_c2_g1	PREDICTED: BI1-like protein [Nelumbo nucifera]	Protein LIFEGUARD 2 OS=Arabidopsis thaliana OX=3702 GN=LFG2 PE=2 SV=1	Inhibitor of apoptosis-promoting Bax1	-	-	-	-	-	0.4	0.71	0.51	3.34	2.81	3.63	1.68	1.5	1.69	29.48	28.9	26.75
TR2604_c0_g2	protein NYNRIN-like [Citrus clementina]	-	-	-	-	-	-	-	0.26	0.28	0.38	1.25	1.26	1.23	2.81	2.92	2.7	0.58	0.77	0.56
TR10820_c1_g1	-	-	-	-	-	-	-	-	0.25	0.14	0.17	0.85	1.32	0.98	0	0.06	0.09	1.43	0.98	1.13
TR728_c2_g1	AAA+ ATPase domain [Macleaya cordata]	Protein HYPER-SENSITIVITY-RELATED 4 OS=Arabidopsis thaliana OX=3702 GN=HSR4 PE=2 SV=1	Domain associated at C-terminal with AAA;ATPase family associated with various cellular activities (AAA)	-	-	-	-	-	0.24	0.36	0.23	4.82	5.47	6.17	1.36	1.37	1.88	0	0.19	0.11
TR13652_c0_g1	Rubber elongation factor [Macleaya cordata]	Stress-related protein OS=Vitis riparia OX=96939 GN=SRP PE=2 SV=1	-	-	-	-	-	-	0.22	0.14	0.58	4.17	3.2	3.72	0.32	0.39	0.59	1.79	2.58	2.39
TR4860_c0_g1	-	-	-	-	-	-	-	-	0.22	0.2	0.08	0.71	0.74	0.7	2.07	2.61	2.22	0.37	0.68	0.66
TR29996_c0_g1	PREDICTED: probably inactive leucine-rich repeat receptor-like protein kinase At5g48380 [Nelumbo nucifera]|XP_010251402.1 PREDICTED: probably inactive leucine-rich repeat receptor-like protein kinase At5g48380 [Nelumbo nucifera]|XP_010251403.1 PREDICTED: probably inactive leucine-rich repeat receptor-like protein kinase At5g48380 [Nelumbo nucifera]	-	Leucine rich repeat;Leucine Rich repeats (2 copies)	-	-	-	-	-	0.19	0.82	0.7	3.66	3.62	5.62	0.16	0.08	0.17	16.54	15.15	13.46
TR10637_c0_g2	probable xyloglucan endotransglucosylase/hydrolase protein 6 [Abrus precatorius]	Probable xyloglucan endotransglucosylase/hydrolase protein 6 OS=Arabidopsis thaliana OX=3702 GN=XTH6 PE=2 SV=2	Glycosyl hydrolases family 16;Xyloglucan endo-transglycosylase (XET) C-terminus	-	-	-	-	-	0.18	0.23	0.37	2.58	2.31	3.1	0.74	0.92	0.94	2.87	1.63	1.58
TR5659_c0_g1	hypothetical protein MIMGU_mgv1a022591mg [Erythranthe guttata]	Protein ACCELERATED CELL DEATH 6 OS=Arabidopsis thaliana OX=3702 GN=ACD6 PE=1 SV=1	Domain of unknown function;Ankyrin repeats (3 copies);Ankyrin repeats (many copies);Ankyrin repeat;Ankyrin repeats (many copies)	-	-	-	-	-	0.15	0.15	0.14	2.57	3.32	3.01	0.21	0.28	0.07	5.45	4.73	5.27
TR15886_c0_g2	-	-	-	-	-	-	-	-	0.14	0.35	0.41	14.27	15.46	15.01	2.99	3.04	3.26	0.6	0.67	0.5
TR55062_c0_g1	PREDICTED: chlorophyllase-1 [Vitis vinifera]	Chlorophyllase-2, chloroplastic OS=Arabidopsis thaliana OX=3702 GN=CLH2 PE=1 SV=1	Chlorophyllase;Chlorophyllase enzyme	-	-	-	K08099|E3.1.1.14; chlorophyllase [EC:3.1.1.14]	ko00860(Metabolism);ko01100(Metabolism);ko01110(Metabolism)	0.14	0.05	0.11	1.56	1.45	1.26	0	0	0	0.82	0.92	1.51
TR28176_c0_g2	-	-	-	-	-	-	-	-	0.12	0.08	0.02	0.79	0.39	0.62	0	0.03	0.02	0.33	0.17	0.25
TR11783_c0_g1	-	-	-	-	-	-	-	-	0.11	0	0.06	1.16	0.85	0.81	0	0.03	0	0.7	0.41	0.55
TR7569_c0_g1	Meiotic nuclear division protein 1 [Macleaya cordata]	Meiotic nuclear division protein 1 homolog OS=Arabidopsis thaliana OX=3702 GN=MND1 PE=1 SV=1	Mnd1 family	-	-	-	-	-	0.1	0.05	0.12	2.75	2.02	4.32	0.7	0.48	0.72	1.43	1.69	2.09
TR3693_c3_g1	hypothetical protein BVC80_1013g2 [Macleaya cordata]	-	-	-	-	-	-	-	0.07	0.05	0.1	5.98	6.34	5.76	0.31	0.55	0.4	1.43	1.5	1.47
TR125028_c1_g1	-	-	-	-	-	-	-	-	0.05	0.1	0	0.74	0.97	0.88	0	0	0	0.34	0.62	0.55
TR6136_c0_g2	Signal transduction response regulator [Macleaya cordata]	-	-	-	-	-	-	-	0.03	0.03	0.08	0.68	0.58	0.67	0.04	0.06	0	1.33	0.71	1.59
TR9417_c0_g1	hypothetical protein AMTR_s00154p00046110 [Amborella trichopoda]	Replication protein A 70 kDa DNA-binding subunit B OS=Oryza sativa subsp. japonica OX=39947 GN=RPA1B PE=1 SV=1	Replication protein A OB domain;Replication factor-A C terminal domain	-	-	-	-	-	0.03	0.14	0	0.75	0.91	0.66	0	0.02	0.04	1.11	0.65	0.68
TR121102_c0_g1	Retrovirus-related Pol polyprotein from transposon RE1 [Vitis vinifera]	Retrovirus-related Pol polyprotein from transposon RE1 OS=Arabidopsis thaliana OX=3702 GN=RE1 PE=2 SV=1	Reverse transcriptase (RNA-dependent DNA polymerase);gag-polypeptide of LTR copia-type;Retrotransposon gag protein;GAG-pre-integrase domain	-	-	-	-	-	0.01	0.03	0	0.54	0.55	0.58	0.03	0.01	0.01	0.16	0.18	0.18
TR25370_c0_g2	-	-	-	-	-	-	-	-	0	0	2.85	30.66	34.34	41.23	1.17	0.56	1.09	9.34	10.01	14.74
TR26334_c0_g1	-	-	-	-	-	-	-	-	0	0	0.05	1.83	1.56	1.5	4.24	4.1	4.69	0.05	0.29	0.11
TR28559_c0_g1	-	-	-	-	-	-	-	-	0	0.19	0.23	3.39	3.04	1.84	0.23	0.22	0.46	5.42	3.62	3.43
TR29665_c0_g1	PREDICTED: probable apyrase 1 [Nelumbo nucifera]	Apyrase 2 OS=Arabidopsis thaliana OX=3702 GN=APY2 PE=1 SV=1	-	-	-	-	-	-	0	0.61	0	5.41	6.23	9.6	0	0	0	7.01	5.63	5.68
