# Supplementary material for: Integrative Metabolomic and Transcriptomic Landscape during Akebia trifoliata Fruit Ripening and Cracking
Source: Int J Mol Sci. 2023 Nov 24;24(23):16732. doi: 10.3390/ijms242316732 (PMC10706055; doi:10.3390/ijms242316732)
Supplement: Supplementary file 1 [file ijms-24-16732-s001.zip › Table S4.xlsx]

## Sheet: Cluster 1
Gene	G	T	P	C	Cluster
TR1001_c0_g2	-0.328397419182289	-0.728922518370112	1.47783444486436	-0.420514507311963	Cluster 1
TR1002_c0_g2	-0.0605701500191032	0.317993287600291	1.06754889408669	-1.32497203166788	Cluster 1
TR10020_c0_g1	-0.0885379277409296	-0.871399604608095	1.4212667347886	-0.461329202439579	Cluster 1
TR10028_c0_g1	-1.09348765742921	0.692596504332959	0.989190772070838	-0.588299618974584	Cluster 1
TR10031_c1_g1	-0.652738835130699	0.0012292633429957	1.41242358110202	-0.760914009314318	Cluster 1
TR100476_c1_g1	-0.505318960020666	-0.505318960020666	1.49995733515369	-0.48931941511236	Cluster 1
TR10061_c0_g1	0.0194106251309918	0.174695626178925	1.11749741825566	-1.31160366956558	Cluster 1
TR10064_c0_g1	-0.586760610762559	-0.26185127438402	1.47954876532903	-0.630936880182449	Cluster 1
TR10069_c0_g1	-0.22173834248302	-0.3025352626053	1.42872865830544	-0.904455053217115	Cluster 1
TR10074_c1_g1	-0.607273525489915	-0.784227400467108	1.4196526787943	-0.0281517528372808	Cluster 1
TR10076_c0_g2	-0.757818966003172	-0.366495333680752	1.47302219553184	-0.348707895847914	Cluster 1
TR10093_c0_g1	-0.299734995686565	-0.662513883454805	1.48319051371101	-0.520941634569638	Cluster 1
TR1010_c3_g1	-0.667761460060313	-0.549716973186566	1.47787068370367	-0.260392250456795	Cluster 1
TR10104_c0_g1	0.521747794288377	-0.748381032772674	1.1482136567653	-0.921580418281	Cluster 1
TR1011_c0_g4	-0.814629852167062	-0.901091395348972	1.0199760172241	0.695745230291935	Cluster 1
TR1011_c1_g1	0.518372519901161	0.0389059288694717	0.855930435128375	-1.41320888389901	Cluster 1
TR1011_c2_g1	-0.842894729171609	-0.859822244989454	1.07564807166697	0.627068902494094	Cluster 1
TR10138_c0_g1	0.539358276892059	-0.552402007893076	1.102847456136	-1.08980372513498	Cluster 1
TR10144_c0_g1	-0.521324747723529	-0.474595358571841	1.49972133308702	-0.503801226791646	Cluster 1
TR10146_c0_g2	-0.560729503880263	-0.54003360523647	1.49592542384665	-0.39516231472992	Cluster 1
TR101506_c0_g1	-0.614179494058266	-0.656658767422527	1.4673049007905	-0.196466639309705	Cluster 1
TR101547_c0_g1	-0.630272702526162	-0.742045201496319	1.43130894514562	-0.0589910411231382	Cluster 1
TR1016_c1_g1	0.240870931311312	-0.232682684354554	1.19753111742593	-1.20571936438269	Cluster 1
TR1016_c2_g2	-0.013687149218701	-0.583809557059201	1.41240851360671	-0.814911807328804	Cluster 1
TR10176_c0_g1	-0.409843255831102	-0.00836414807818561	1.38053654901298	-0.962329145103696	Cluster 1
TR10178_c0_g1	0.0424394222606826	-1.19783104054131	1.24699947637864	-0.0916078580980198	Cluster 1
TR10193_c2_g1	-0.200534935631686	0.2186623874402	1.19754478509996	-1.21567223690847	Cluster 1
TR10211_c0_g1	-0.167270804228562	-0.618739576806623	1.46077755731642	-0.674767176281238	Cluster 1
TR102142_c0_g1	0.288341686455795	-0.773819781279224	1.29159974542554	-0.806121650602113	Cluster 1
TR10228_c0_g1	0.6412100649901	-1.16193193163885	1.00305474896792	-0.482332882319168	Cluster 1
TR10229_c1_g1	0.337366589623911	-0.735286156872628	1.26347095329739	-0.865551386048678	Cluster 1
TR10250_c0_g1	-0.798204237121251	-0.263558002823055	1.46086435850493	-0.399102118560626	Cluster 1
TR10267_c2_g2	-0.0665204080049668	-0.637941617752552	1.43400551682838	-0.729543491070867	Cluster 1
TR10292_c0_g3	-0.725580843603324	-0.716201220509652	1.39957376019145	0.0422083039215228	Cluster 1
TR10303_c0_g1	-0.602253356076322	-1.01151068496401	1.20186293095828	0.41190111008205	Cluster 1
TR1031_c0_g1	-0.900998219630411	0.105648378539782	1.36223439084077	-0.566884549750142	Cluster 1
TR10315_c0_g1	0.12317788445397	0.322659093612615	0.956346750975239	-1.40218372904182	Cluster 1
TR103246_c1_g1	-0.52464212797582	-0.491680318888334	1.49976231348062	-0.483439866616462	Cluster 1
TR103461_c0_g1	-0.937785698303404	-0.763891661531911	1.06199572456875	0.63968163526656	Cluster 1
TR10365_c0_g1	-0.493756852497321	-1.03460824830288	1.27302437380084	0.25534072699936	Cluster 1
TR1041_c0_g2	-0.409661186800191	-0.613079155418217	1.49455701942966	-0.471816677211255	Cluster 1
TR10419_c0_g1	-0.77083715460329	-0.529075945820798	1.45026951721616	-0.150356416792067	Cluster 1
TR1042_c0_g1	-0.552992194756196	-0.534648293340649	1.49693878843125	-0.409298300334407	Cluster 1
TR10429_c0_g1	-0.652667740831662	-0.00811701013470974	1.41566669349438	-0.754881942528007	Cluster 1
TR1044_c0_g1	-1.26613707559401	-0.324993030205518	0.908323487912976	0.682806617886556	Cluster 1
TR1045_c0_g1	-0.584160537234381	-0.218886874752116	1.47119712107146	-0.668149709084967	Cluster 1
TR1045_c0_g2	-0.553452271636948	0.231751524834592	1.29844347475819	-0.976742727955837	Cluster 1
TR10488_c0_g1	-0.607789767046171	-0.62274372711945	1.47714710689953	-0.246613612733913	Cluster 1
TR10493_c0_g1	-0.297598320361322	-0.125850035973694	1.39619510497874	-0.972746748643726	Cluster 1
TR10496_c0_g1	0.569950940734442	-0.889123467545729	1.11710384383951	-0.797931317028218	Cluster 1
TR1050_c1_g2	-0.510077154127309	-0.506032934867628	1.49989981793432	-0.483789728939381	Cluster 1
TR10537_c0_g1	-0.555773853042419	-0.0648793668108592	1.42708551013283	-0.806432290279553	Cluster 1
TR10549_c0_g1	-0.634698195349257	-0.653559954497823	1.46272942197132	-0.174471272124239	Cluster 1
TR105542_c0_g1	0.706408879460444	-0.805260621207807	1.0105855853666	-0.911733843619236	Cluster 1
TR10560_c0_g1	-0.482965745677609	-0.56695978840415	1.49813512414839	-0.448209590066627	Cluster 1
TR10587_c0_g1	0.519058764729975	0.213730079594696	0.732788844324671	-1.46557768864934	Cluster 1
TR10587_c1_g1	-0.295675920989192	-0.455614497467331	1.4762751499923	-0.724984731535776	Cluster 1
TR1059_c2_g2	-0.935593561838756	-0.0319491081923346	1.39359948702177	-0.426056816990683	Cluster 1
TR1060_c0_g2	-0.433871224685702	-1.19019032910963	1.00749787851019	0.61656367528514	Cluster 1
TR10617_c1_g1	-0.197241634034791	0.319667475849489	1.13281689432242	-1.25524273613712	Cluster 1
TR10667_c0_g1	-0.490255159076486	-0.53343359510524	1.49955110124863	-0.475862347066901	Cluster 1
TR1067_c3_g1	-1.21890988785718	-0.2415529178152	1.17149950150339	0.288963304168991	Cluster 1
TR10670_c0_g1	0.236005328112867	0.439658007666016	0.785276040600613	-1.4609393763795	Cluster 1
TR10683_c0_g1	-0.56142807335187	-0.571776977929785	1.49282948536419	-0.359624434082534	Cluster 1
TR10686_c0_g1	-0.312916632768881	0.0622969040066191	1.32255611149685	-1.07193638273459	Cluster 1
TR10686_c1_g1	-0.618676957883291	0.691462482340149	0.997161685058952	-1.06994720951581	Cluster 1
TR1070_c0_g1	-1.27704378560398	0.365391641088405	1.09617492326521	-0.184522778749644	Cluster 1
TR10729_c0_g1	0.224893803139328	-1.1699531556574	1.22554488227611	-0.280485529758038	Cluster 1
TR107576_c0_g1	-1.18815964911369	-0.361158414431786	1.1335796475703	0.415738415975173	Cluster 1
TR10826_c0_g1	-0.702205524578541	-0.031766923741553	1.42446919952203	-0.690496751201939	Cluster 1
TR10834_c0_g1	0.410528627434455	0.0758796989096862	0.920284553443115	-1.40669287978726	Cluster 1
TR10836_c0_g1	-0.619469438019789	-0.361908727786272	1.49162068295149	-0.510242517145428	Cluster 1
TR108486_c1_g1	-0.52323847491241	-0.599809959045933	1.49314394060371	-0.370095506645363	Cluster 1
TR1085_c0_g1	-0.783726651085726	-0.555659130196112	1.43781994128348	-0.0984341600016407	Cluster 1
TR1085_c0_g2	-0.419479316753191	-0.445982367267009	1.49353828628301	-0.628076602262811	Cluster 1
TR10858_c0_g1	-0.287127763749682	-1.2633546371719	1.01967408515166	0.530808315769916	Cluster 1
TR10866_c0_g2	0.718213221899033	-0.63616669868124	0.977823116259809	-1.0598696394776	Cluster 1
TR1090_c1_g1	-0.52435337659352	-0.420567733003259	1.49757966171492	-0.552658552118136	Cluster 1
TR10942_c0_g1	-1.41945845096381	0.20305623375848	0.927644918143744	0.288757299061583	Cluster 1
TR10946_c0_g1	-0.549915781634041	-1.07186974386296	1.15264833325553	0.469137192241471	Cluster 1
TR10948_c0_g1	-0.591794723786729	-0.958540749795406	1.28956476028376	0.260770713298377	Cluster 1
TR10957_c0_g1	-0.505283339104531	-0.531617324204441	1.49939127662615	-0.462490613317176	Cluster 1
TR10962_c0_g1	-1.088470562558	0.41104869563371	1.1803820721407	-0.502960205216403	Cluster 1
TR1098_c0_g1	-0.728769451623156	-0.273474233278995	1.47371135713603	-0.471467672233879	Cluster 1
TR10983_c0_g1	0.148388818736109	-0.958115459246727	1.33549936862498	-0.525772728114361	Cluster 1
TR10997_c1_g1	-0.207215324696811	-1.17326745914539	1.2504373042049	0.130045479637309	Cluster 1
TR110_c3_g1	0.0840584063697567	0.290561114112379	1.00397914903351	-1.37859866951564	Cluster 1
TR11000_c0_g1	-0.926903060299406	-0.258219371065696	1.42078699545268	-0.235664564087575	Cluster 1
TR11008_c0_g1	-0.182076837465265	-0.33163995395459	1.42410097874618	-0.910384187326326	Cluster 1
TR11009_c0_g1	-0.192259329803267	-0.527339876031817	1.46117090650483	-0.741571700669742	Cluster 1
TR11010_c0_g1	-0.513250332538155	-0.513250332538155	1.49973307050114	-0.473232405424829	Cluster 1
TR11028_c0_g1	-0.39308822925317	0.106686155581965	1.32495537558968	-1.03855330191847	Cluster 1
TR11031_c0_g1	-0.705404943638764	-0.651611543225889	1.43911963876293	-0.0821031518982742	Cluster 1
TR11045_c1_g1	-1.36306140003693	0.547554579502016	0.912590965836693	-0.0970841453017761	Cluster 1
TR11055_c0_g1	-0.628006908743443	-0.495224433971366	1.49154463583259	-0.368313293117783	Cluster 1
TR11065_c0_g4	-0.295771075463732	-1.13903329061565	1.25860032112226	0.176204044957117	Cluster 1
TR110809_c2_g1	-0.5212688946969	-0.477855478186408	1.49976419732345	-0.500639824440142	Cluster 1
TR11085_c0_g1	-0.00537883227038995	-0.650838704717168	1.41463288711252	-0.758415350124965	Cluster 1
TR11085_c0_g2	-0.250362048260218	-0.523894894059223	1.47412342938278	-0.699866487063338	Cluster 1
TR11089_c0_g1	0.0543990046591936	-0.150762955769766	1.26671967992123	-1.17035572881065	Cluster 1
TR11120_c0_g1	-0.60088089523666	-1.06274636211895	1.08249718800536	0.581130069350246	Cluster 1
TR11138_c0_g1	-0.837937040010049	-0.842834392669371	1.13618581696278	0.544585615716642	Cluster 1
TR11138_c0_g2	-0.43305898559155	-0.64578971535582	1.49164761703756	-0.412798916090191	Cluster 1
TR11141_c0_g1	-0.973709718085459	-0.382376517029181	1.38025129381165	-0.0241650586970116	Cluster 1
TR11144_c0_g1	0.636349352587861	-0.208076137512856	0.89492940697277	-1.32320262204777	Cluster 1
TR11174_c0_g1	-0.5	-0.5	1.5	-0.5	Cluster 1
TR11216_c2_g1	-1.04198550650692	-0.474955773307177	1.27718433474732	0.239756945066771	Cluster 1
TR11218_c0_g1	0.563502560572605	-0.737599085193805	1.11740200103502	-0.943305476413822	Cluster 1
TR1122_c1_g3	-1.27638396457754	0.479164818040534	1.04027376438365	-0.243054617846647	Cluster 1
TR11242_c0_g1	0.506674226560471	-0.86047260890011	1.16185641607832	-0.808058033738682	Cluster 1
TR11243_c0_g1	0.596344185682402	-0.91240853839244	1.09663111459871	-0.780566761888669	Cluster 1
TR11245_c0_g1	0.555509345467463	-0.790259954354521	1.12716356132105	-0.892412952433991	Cluster 1
TR11254_c0_g1	-0.0982916252414255	-0.283311155107638	1.38186461368828	-1.00026183333921	Cluster 1
TR1126_c0_g2	-0.16904888702976	-0.251898071303805	1.39777539203526	-0.976828433701694	Cluster 1
TR11270_c2_g1	-0.125927620289737	0.27883973064156	1.12660246009211	-1.27951457044393	Cluster 1
TR11272_c1_g2	-0.762472142168101	0.291740727225133	1.28957857686472	-0.81884716192175	Cluster 1
TR11276_c0_g1	-0.225836675052857	-0.514405759842618	1.46793838784357	-0.727695952948094	Cluster 1
TR1128_c1_g1	0.424397326097142	-0.766893413824659	1.21362744129533	-0.871131353567817	Cluster 1
TR112905_c0_g1	-0.58684276737561	-0.433753349799364	1.49687430518996	-0.476278188014988	Cluster 1
TR113_c11_g1	-0.693681002555083	-0.693681002555083	1.42690220614125	-0.0395402010310867	Cluster 1
TR1136_c0_g1	-0.757712575753055	-0.87035138061057	1.22819619911945	0.39986775724418	Cluster 1
TR1136_c0_g2	-0.427511173300189	-0.608760149998887	1.49530405776426	-0.45903273446518	Cluster 1
TR11360_c0_g1	-0.505279388603128	-0.519685677250932	1.4997370196736	-0.474771953819543	Cluster 1
TR11360_c0_g2	-0.492587680020615	-0.537584710079591	1.4993962275902	-0.469223837489993	Cluster 1
TR11369_c0_g1	-0.053011797994425	-0.337113861032509	1.37985078080635	-0.989725121779412	Cluster 1
TR11374_c0_g1	-0.208766035538941	-0.424900284096904	1.45153796474723	-0.817871645111382	Cluster 1
TR11398_c0_g1	-0.539766360257679	-1.10567896206551	1.07999795613013	0.565447366193056	Cluster 1
TR11448_c0_g1	-0.681819628873581	-0.828613656619735	1.3501187551916	0.16031453030172	Cluster 1
TR11457_c0_g1	0.616267217289198	-0.493887911728223	1.02711202881533	-1.14949133437631	Cluster 1
TR11459_c0_g1	0.279805174498029	-1.02798336602113	1.2643345563994	-0.516156364876307	Cluster 1
TR1147_c0_g1	-0.103596002686283	0.255536806626164	1.13076606568482	-1.2827068696247	Cluster 1
TR11485_c0_g1	-1.16203859019738	0.184994351033781	1.24288797324177	-0.265843734078174	Cluster 1
TR11488_c0_g1	-0.305087939264632	-0.6388706360601	1.48520107082015	-0.541242495495417	Cluster 1
TR11489_c0_g1	-0.765782030021186	0.445844501990095	1.2000698532421	-0.880132325211005	Cluster 1
TR115025_c0_g1	-0.4798291824042	-0.495424738471262	1.49974310474443	-0.524489183868968	Cluster 1
TR11533_c0_g1	-0.470081062122052	-0.558533340882499	1.4986954651266	-0.470081062122052	Cluster 1
TR11542_c0_g1	-0.867043955070056	0.731293842377194	0.990975822657892	-0.85522570996503	Cluster 1
TR1155_c1_g1	-0.0811434011197679	0.0231838288913622	1.25192676013356	-1.19396718790515	Cluster 1
TR1156_c0_g3	-0.490288435898843	-0.503971910903836	1.49996434315018	-0.505703996347506	Cluster 1
TR11576_c0_g1	-0.0525264484062387	-1.39208606402029	0.811426139092113	0.633186373334417	Cluster 1
TR11577_c0_g1	-0.281564640663899	-0.578544552157441	1.48269737592062	-0.62258818309928	Cluster 1
TR11581_c0_g1	-0.11152799125188	-0.789686678940855	1.44001688512744	-0.538802214934707	Cluster 1
TR11598_c0_g1	-0.898788082264589	0.289220407424247	1.28527992716336	-0.675712252323017	Cluster 1
TR1160_c8_g1	-1.33719916415012	0.744933940773484	0.786837600387855	-0.194572377011221	Cluster 1
TR11600_c0_g1	-0.620523083828543	-1.01461573873915	1.17017862883544	0.464960193732251	Cluster 1
TR11613_c0_g1	0.452495546262205	0.21017552695239	0.793721695902556	-1.45639276911715	Cluster 1
TR116169_c0_g1	-0.350633492007719	-0.570638820326287	1.49191113266029	-0.570638820326287	Cluster 1
TR11622_c0_g1	-0.0952949480406137	-0.563180873184228	1.43760404447535	-0.779128223250511	Cluster 1
TR11646_c0_g1	-0.901069908213756	-0.787999040042042	1.10972645875743	0.579342489498365	Cluster 1
TR11653_c1_g1	-1.03560335030574	-0.393634821107307	1.32748793510878	0.101750236304269	Cluster 1
TR116638_c0_g1	-0.518415327936599	-0.00727235930973188	1.40148752983261	-0.875799842586279	Cluster 1
TR11673_c6_g1	-0.906293286617263	-0.360568296826223	1.42278300909807	-0.155921425654583	Cluster 1
TR11702_c0_g1	-0.239781158595474	-0.680035089131428	1.47406449956234	-0.554248251835441	Cluster 1
TR11717_c0_g1	-0.5	-0.5	1.5	-0.5	Cluster 1
TR11725_c1_g2	-0.418181591465041	0.282729456440375	1.23734450328088	-1.10189236825621	Cluster 1
TR11733_c0_g2	0.103710120158672	-0.62061452856856	1.36986723338835	-0.852962824978464	Cluster 1
TR1174_c0_g2	0.0596526174922851	0.193515931745806	1.08315660512033	-1.33632515435842	Cluster 1
TR1174_c0_g3	-0.91180094712729	0.106438274834755	1.36001759094572	-0.554654918653187	Cluster 1
TR117490_c0_g1	-0.741714440368964	-0.412063577982758	1.47534920273827	-0.321571184386544	Cluster 1
TR11752_c0_g1	-0.15264416768667	0.39939977710497	1.05703216871747	-1.30378777813577	Cluster 1
TR11771_c0_g1	-1.20562522774964	-0.399855603173249	1.02387268085271	0.58160815007018	Cluster 1
TR11782_c0_g1	-0.764949237044811	0.0138100668372353	1.40817718731492	-0.657038017107345	Cluster 1
TR118_c0_g1	-0.736408942179002	-0.968726104486224	1.03357697154284	0.67155807512239	Cluster 1
TR11807_c0_g1	-0.558063076053293	-0.547238576733294	1.49558498937989	-0.390283336593305	Cluster 1
TR118221_c0_g2	-0.361794950527669	-0.586599579981754	1.49284324246854	-0.544448711959113	Cluster 1
TR11842_c0_g1	-0.462460620058788	-0.622159251445995	1.4938476144345	-0.409227742929718	Cluster 1
TR11870_c0_g1	-0.5	-0.5	1.5	-0.5	Cluster 1
TR1188_c1_g2	-1.07824938116046	-0.589851473284609	1.05560547815895	0.612495376286126	Cluster 1
TR11905_c0_g1	-0.516829791388387	-0.456865103883827	1.49930000678322	-0.525605111511005	Cluster 1
TR1195_c2_g2	-0.525402324035299	-0.560270653232212	1.49696076938564	-0.41128779211813	Cluster 1
TR1195_c4_g1	-0.784512536220663	-0.505248120516821	1.45033769576719	-0.160577039029709	Cluster 1
TR11951_c1_g1	-0.781260995165948	-0.942693991568599	0.948432387818995	0.775522598915552	Cluster 1
TR1196_c0_g1	-0.402846775798343	-0.838915149878046	1.44639580416578	-0.204633878489387	Cluster 1
TR1200_c0_g2	-0.755373960404691	0.314642752266579	1.27707940625847	-0.836348198120355	Cluster 1
TR12015_c0_g1	-0.779114615496608	-0.874832109106739	1.18744479867518	0.466501925928165	Cluster 1
TR12018_c0_g1	0.400279456634573	-1.08323508772709	1.1879894528829	-0.505033821790388	Cluster 1
TR12018_c3_g1	-0.812272585740066	-0.812272585740066	1.23703898378762	0.387506187692508	Cluster 1
TR12019_c0_g1	-0.533497631995857	-0.491722939767796	1.49953738976976	-0.474316818006104	Cluster 1
TR12094_c0_g2	0.0472945748558136	-0.718149928964431	1.39773658920027	-0.726881235091658	Cluster 1
TR1211_c0_g2	-0.878989827147009	-0.705808273676514	1.27892708372276	0.305871017100766	Cluster 1
TR12127_c0_g1	-0.449784671327028	-0.481536427840014	1.4981664631805	-0.566845364013458	Cluster 1
TR12128_c0_g2	-0.650408170063174	-0.862497790735948	1.3432342642609	0.169671696538219	Cluster 1
TR12137_c0_g1	-0.142851799833131	-0.378355851618768	1.42263039703666	-0.901422745584765	Cluster 1
TR1214_c2_g1	-0.546717960305628	-0.738468727176913	1.45804138010527	-0.172854692622726	Cluster 1
TR12152_c0_g1	0.305243595823995	-0.845205191324926	1.28158231748486	-0.741620721983931	Cluster 1
TR12157_c0_g1	-1.20325004380429	-0.230785493259495	1.20214580699444	0.231889730069349	Cluster 1
TR121590_c0_g1	-0.491569908473586	-0.531393293463851	1.49959934103967	-0.476636139102237	Cluster 1
TR12169_c1_g1	-0.495077935068485	-0.448403920987955	1.49856923779989	-0.555087381743453	Cluster 1
TR1218_c1_g1	-0.526325702724986	-0.591809460451267	1.49384822313079	-0.375713059954539	Cluster 1
TR1219_c0_g1	-0.130211481749071	0.0282243466814928	1.27104431820268	-1.16905718313511	Cluster 1
TR1219_c0_g2	0.201873217767394	0.0497640955426599	1.0835427595515	-1.33518007286155	Cluster 1
TR1219_c2_g1	0.581638311731181	-1.10051514942362	1.07059398156793	-0.551717143875499	Cluster 1
TR12196_c0_g1	-0.0849684214701711	-0.903182850442188	1.41299337926321	-0.424842107350855	Cluster 1
TR12210_c2_g1	-0.646799144360476	-0.696393966931247	1.44444920737371	-0.101256096081991	Cluster 1
TR12220_c0_g2	0.0650425313318074	-0.319114919346681	1.32320899678146	-1.06913660876659	Cluster 1
TR12221_c0_g1	0.251638814076492	-0.743732494937189	1.30964022792699	-0.817546547066294	Cluster 1
TR12226_c0_g1	-0.13019979297479	-0.650998964873948	1.45222846010342	-0.671029702254685	Cluster 1
TR12268_c0_g1	-0.155548678406562	-1.33933472446169	0.927231732319631	0.567651670548619	Cluster 1
TR12275_c0_g1	0.0254671499721106	-0.448221839509144	1.37522609849397	-0.952471408956932	Cluster 1
TR12317_c0_g1	-0.440864163950134	-0.839216426376506	1.44068110719419	-0.160600516867549	Cluster 1
TR12322_c0_g1	-0.530514387719911	-0.517117559747186	1.49910505014793	-0.451473102680833	Cluster 1
TR12335_c0_g1	0.551511007188442	0.116078348944999	0.775151590163815	-1.44274094629726	Cluster 1
TR12337_c0_g1	-0.58975888142591	-0.441923172563551	1.49683655223138	-0.465154498241922	Cluster 1
TR12342_c0_g1	-0.349660868027362	-1.11311469919544	1.26470605808425	0.198069509138548	Cluster 1
TR12346_c0_g1	0.0228563343480508	-0.899968164954503	1.38852231164409	-0.511410481037638	Cluster 1
TR12373_c0_g1	-0.540964168860448	0.0938342970433143	1.36343122885084	-0.916301357033704	Cluster 1
TR123846_c0_g1	-0.567884221644969	-0.510917779348295	1.49714931160946	-0.418347310616199	Cluster 1
TR12396_c0_g1	-0.333309966468521	0.147276496811672	1.28673149845987	-1.10069802880302	Cluster 1
TR124_c1_g1	-0.475992306100248	0.0802683065361812	1.35732083509782	-0.961596835533755	Cluster 1
TR1240_c1_g4	-1.04036899437179	-0.486092067137773	1.27131771405264	0.255143347456931	Cluster 1
TR124295_c0_g3	-0.433959981743587	-0.532215071949682	1.49839012564295	-0.532215071949682	Cluster 1
TR12454_c1_g1	-0.809258847306821	0.0204396528318841	1.40276580361042	-0.613946609135484	Cluster 1
TR1249_c0_g1	0.380675976328381	-0.930223250426494	1.23361914133483	-0.684071867236714	Cluster 1
TR1250_c0_g1	0.017615301796595	-0.812261138398534	1.40335237646205	-0.608706539860106	Cluster 1
TR12510_c0_g1	-1.07544287857809	-0.341755564835857	1.3095984042405	0.107600039173443	Cluster 1
TR12543_c0_g1	-0.177082168154623	-0.655436625819596	1.46327920675571	-0.630760412781487	Cluster 1
TR1263_c2_g1	-0.768840732628133	-0.487802344722288	1.45939220005392	-0.202749122703503	Cluster 1
TR12639_c0_g1	0.388670220018245	-0.192199559349681	1.08343603455635	-1.27990669522492	Cluster 1
TR12640_c0_g1	-0.530584964978968	-0.471740052042299	1.49956453133612	-0.497239514314855	Cluster 1
TR12647_c0_g1	-0.629676062517811	0.157419015629453	1.34680713371865	-0.874550086830293	Cluster 1
TR1265_c1_g1	0.465879893501033	0.0838969599040143	0.870709655235543	-1.42048650864059	Cluster 1
TR12671_c0_g1	-0.662460207974118	-0.290895810881623	1.48218341734922	-0.528827398493484	Cluster 1
TR12677_c1_g1	-0.811480985348209	-0.592161800118963	1.41095342497481	-0.00731063950764145	Cluster 1
TR1268_c1_g2	-0.502245846640676	-0.501366385067688	1.49999500119579	-0.496382769487422	Cluster 1
TR12723_c0_g1	-0.41225881457454	-0.248840906094542	1.45961904619634	-0.798519325527262	Cluster 1
TR12724_c0_g1	-0.66960504144685	-0.574446958231833	1.47285121446773	-0.228799214789049	Cluster 1
TR12739_c0_g1	-0.512163177997116	-0.512163177997116	1.49977532768331	-0.475448971689079	Cluster 1
TR1279_c0_g1	-0.911842889082891	-0.167846230083285	1.4223143584014	-0.342625239235228	Cluster 1
TR128123_c0_g1	-0.569911520127718	-0.774926670992454	1.43740100177179	-0.092562810651616	Cluster 1
TR12852_c0_g1	-0.401530370693304	0.30975200024912	1.21606340838544	-1.12428503794125	Cluster 1
TR12855_c0_g1	-0.653093069244691	-0.83212816265591	1.36634578009261	0.118875451807987	Cluster 1
TR12878_c0_g1	-0.016955959280245	-0.857217941390157	1.40734462026032	-0.533170719589922	Cluster 1
TR1289_c0_g1	-1.10817904703472	-0.490162976660089	1.15577362237524	0.442568401319562	Cluster 1
TR12928_c0_g1	-0.794345104353575	-0.719005156311793	1.35120558987979	0.162144670785575	Cluster 1
TR12938_c0_g1	-0.0824085732994925	-0.885739554500473	1.41681702687498	-0.448668899075015	Cluster 1
TR12947_c0_g1	-0.0958060354941495	-1.11282395073974	1.31917541180406	-0.110545425570172	Cluster 1
TR129723_c0_g1	0.0934806602414479	-0.975554582519722	1.34947722348551	-0.467403301207238	Cluster 1
TR12986_c0_g1	0.179613327106738	-0.699546642415717	1.34237328679773	-0.822439971488748	Cluster 1
TR1299_c3_g1	-0.651335782555716	-1.03594659854413	1.04253240018776	0.644749980912079	Cluster 1
TR12990_c0_g1	-1.03066642375578	-0.680588494527029	0.927493050304215	0.783761867978591	Cluster 1
TR12995_c0_g1	-0.349196637998546	0.105571076604212	1.31287108084725	-1.06924551945291	Cluster 1
TR13000_c1_g1	0.192908252094027	-0.828965880501955	1.33619317272121	-0.700135544313286	Cluster 1
TR13045_c0_g1	-0.349297326974012	-0.555800149210219	1.49165336487644	-0.586555888692208	Cluster 1
TR1305_c0_g3	0.389380648657213	-0.828709435693903	1.23581361732448	-0.796484830287789	Cluster 1
TR1305_c1_g1	-0.322231611845167	-0.444560279304906	1.47987851365928	-0.713086622509212	Cluster 1
TR13054_c1_g1	-0.720857909182815	-0.518511829412201	1.46924083656972	-0.229871097974706	Cluster 1
TR1306_c0_g2	-0.726636417590503	-0.177593323189085	1.45999492677913	-0.555765185999541	Cluster 1
TR13066_c0_g1	-0.0657808834933648	0.0735198109631726	1.2188810764947	-1.22662000396451	Cluster 1
TR1308_c2_g1	-0.486637739542413	-0.523054283080554	1.49979800440711	-0.490105981784141	Cluster 1
TR13106_c0_g1	-0.640171402561903	-0.99641885459059	1.17754170591211	0.459048551240378	Cluster 1
TR13106_c0_g2	-0.802758012456618	-0.835685851722872	1.21605916738478	0.422384696794713	Cluster 1
TR13116_c0_g1	-0.408335536987371	-0.702957380130158	1.48344682424526	-0.372153907127731	Cluster 1
TR13177_c0_g1	-0.171607202932821	-0.515064678491002	1.45452904015581	-0.767857158731985	Cluster 1
TR1320_c0_g1	0.352563703088499	-0.500811513551587	1.21734259745651	-1.06909478699343	Cluster 1
TR132003_c0_g2	-0.226388781185142	-0.644337300296174	1.47326852986639	-0.602542448385071	Cluster 1
TR1322_c1_g1	-0.362970565103751	-0.824751632348487	1.45487651805564	-0.267154320603402	Cluster 1
TR1322_c1_g2	-0.69288189508877	-0.608231165824531	1.45787367066189	-0.15676060974859	Cluster 1
TR1325_c0_g1	-0.291025976505884	-0.302377863721938	1.44731207340893	-0.853908233181111	Cluster 1
TR132684_c0_g1	-0.5	-0.5	1.5	-0.5	Cluster 1
TR13269_c0_g1	-1.18854987012614	-0.0854193951836032	1.25688538627302	0.0170838790367205	Cluster 1
TR1328_c0_g1	-1.04281940511637	-0.556542676662552	1.20205425262822	0.397307829150699	Cluster 1
TR13297_c0_g1	-0.633916631561605	-0.433334055604799	1.49301558896151	-0.425764901795108	Cluster 1
TR13300_c0_g2	0.664904255590579	-1.1411412567654	0.993862545341132	-0.517625544166311	Cluster 1
TR13318_c0_g1	-0.719619870654867	-0.0552272866410794	1.43119154375903	-0.656344386463078	Cluster 1
TR13338_c0_g1	0.02830629657289	-0.963390162670429	1.37139126499691	-0.436307398899374	Cluster 1
TR1334_c0_g1	-0.324903521249545	0.329569237612136	1.17788130353784	-1.18254701990043	Cluster 1
TR13340_c0_g1	0.403124780496258	-1.01319330603267	1.20637713122486	-0.596308605688449	Cluster 1
TR13394_c0_g3	-1.04065149647188	-0.658970540085643	0.988455810128465	0.71116622642906	Cluster 1
TR13401_c0_g1	-0.0333704322133	-1.1345946952522	1.3014468563187	-0.1334817288532	Cluster 1
TR13401_c1_g1	-0.556013542346077	-0.223392006240439	1.47072276663658	-0.691317218050065	Cluster 1
TR13447_c0_g1	-0.38483562754521	-0.369594612592925	1.47964853495106	-0.725218294812921	Cluster 1
TR134628_c2_g1	-0.892237632879341	-0.811354901286879	1.06916860823785	0.63442392592837	Cluster 1
TR13494_c0_g1	-0.386063043906911	-0.697813483118126	1.48443959136038	-0.40056306433534	Cluster 1
TR13501_c0_g1	-0.539400489475817	-0.536055370161238	1.49777717310262	-0.422321313465562	Cluster 1
TR1351_c0_g1	-0.706393744529536	0.356778990644735	1.2501216080993	-0.900506854214497	Cluster 1
TR13531_c0_g1	-0.292176255234936	-0.572665460260475	1.48425537659348	-0.619413661098065	Cluster 1
TR135637_c0_g1	-0.518045762932093	-0.545088934895921	1.49836074662088	-0.435226048792867	Cluster 1
TR13569_c0_g1	-0.208544640108413	-0.980159808509538	1.39724908872636	-0.208544640108413	Cluster 1
TR13572_c0_g1	-0.596586530676356	-0.107487944993166	1.44397826633677	-0.739903790667245	Cluster 1
TR13574_c0_g1	-0.0570860481770665	-0.631571040943099	1.43077571542203	-0.742118626301862	Cluster 1
TR13599_c0_g1	-0.569825583156042	-0.524379371002493	1.49622913859378	-0.402024184435244	Cluster 1
TR136004_c0_g1	-0.36295127102241	-0.588939798262778	1.49289390722425	-0.541002837939064	Cluster 1
TR13616_c0_g1	-1.32084035366577	0.518635054123001	0.97757110921026	-0.175365809667489	Cluster 1
TR13626_c0_g1	-0.769335491596131	-0.842848637442078	1.25227601916742	0.359908109870784	Cluster 1
TR1367_c0_g1	-0.642140769746337	-0.71980042620943	1.43664932192001	-0.0747081259642394	Cluster 1
TR13687_c0_g1	-0.353941689945938	-0.327276372285494	1.46657227032619	-0.785354208094757	Cluster 1
TR13688_c0_g1	-0.684724284038668	-0.470840776659995	1.48381683243954	-0.32825177174088	Cluster 1
TR1369_c3_g1	-0.436995449072038	-0.575893758068041	1.49750693358218	-0.484617726442097	Cluster 1
TR13773_c1_g1	-0.498694754365894	0.367815588061722	1.20724748228848	-1.0763683159843	Cluster 1
TR1380_c0_g1	-1.24464879309721	-0.326420170357421	1.02023685736536	0.550832106089277	Cluster 1
TR13825_c0_g1	-0.403595094182046	0.101313994835822	1.33036901415563	-1.02808791480941	Cluster 1
TR13827_c0_g1	-0.0774824213363993	-0.754434102485994	1.43546380581119	-0.603547281988795	Cluster 1
TR13880_c0_g1	0.121488162140966	-1.35045536756697	1.06522229123601	0.163744914189998	Cluster 1
TR13905_c0_g1	0.772210783378184	-1.19718584537155	0.875863237522906	-0.450888175529544	Cluster 1
TR139242_c0_g1	-0.514885598509164	-0.51844471554955	1.49957464634927	-0.466244332290556	Cluster 1
TR1393_c0_g2	0.200501176942324	-1.10329257258637	1.26841118889182	-0.365619793247768	Cluster 1
TR139395_c0_g1	-0.506783193611145	-0.472774974507222	1.49970173352034	-0.520143565401972	Cluster 1
TR1394_c0_g1	-0.523253674125781	0.417086261984318	1.18149162940285	-1.07532421726139	Cluster 1
TR13949_c0_g1	-0.282210859671308	-0.0364143044737174	1.35686634527065	-1.03824118112563	Cluster 1
TR13958_c0_g1	-0.359683823086479	-0.776934371167545	1.4686007361401	-0.331982541886076	Cluster 1
TR1396_c4_g1	-0.310924395585416	-0.607349726091719	1.48695967422455	-0.568685552547419	Cluster 1
TR1397_c1_g1	-0.590124573533969	-0.601266507491455	1.48466269983495	-0.293271618809531	Cluster 1
TR1400_c1_g1	-0.710681507177795	-0.99934620555983	0.985669066030218	0.724358646707407	Cluster 1
TR14019_c1_g1	-0.548776135046927	-0.768286589065698	1.44632999147923	-0.12926726736661	Cluster 1
TR14026_c0_g1	0.362559233639977	-0.302350841049945	1.14788609350996	-1.2080944861	Cluster 1
TR14033_c0_g1	-1.31457474405591	0.432246545845692	1.03099655040648	-0.148668352196264	Cluster 1
TR14034_c1_g1	-0.515954711565714	-0.507939881094791	1.4997751518716	-0.475880559211096	Cluster 1
TR14082_c0_g1	0.786439264726007	-1.02583286333944	0.926085530583846	-0.686691931970408	Cluster 1
TR14082_c0_g2	-0.358494206048511	-0.473105736606771	1.48861720504158	-0.657017262386304	Cluster 1
TR14105_c0_g1	-1.47169389370487	0.282405020980301	0.748203017958517	0.441085854766048	Cluster 1
TR1411_c0_g2	0.699660583870493	-0.93050865545267	1.01486366506841	-0.784015593486236	Cluster 1
TR1413_c2_g1	0.378554722487752	-0.699571340826536	1.23655905763611	-0.915542439297322	Cluster 1
TR14167_c0_g1	0.382586341367438	-1.00840638320689	1.21870218673998	-0.592882144900533	Cluster 1
TR14177_c0_g1	-0.52523550673833	-0.520377837311849	1.4991982267479	-0.453584882697726	Cluster 1
TR14195_c0_g3	0.0806374105741317	-0.728143782049995	1.3852785010571	-0.737772129581235	Cluster 1
TR14211_c0_g1	-0.540214930679053	-0.544732407451282	1.49716709359623	-0.412219755465898	Cluster 1
TR14217_c0_g1	-0.734212346090394	-0.343833244422357	1.47753752163696	-0.399491931124207	Cluster 1
TR14227_c0_g1	-0.445051366205922	-0.407652091734836	1.49223105139633	-0.639527593455568	Cluster 1
TR14305_c0_g1	-0.652163508924968	-0.52215170865165	1.48508083369755	-0.310765616120933	Cluster 1
TR14341_c1_g1	-0.883615129088592	-0.788003032162866	1.15292253542939	0.518695625822069	Cluster 1
TR14354_c0_g1	-0.917080848969561	0.708949025089944	1.00813852191689	-0.800006698037277	Cluster 1
TR1438_c0_g1	-1.3153629835632	-0.198276818782757	0.962919147874837	0.550720654471121	Cluster 1
TR14425_c0_g1	-0.304233838490982	-0.214505886124978	1.42703495671379	-0.90829523209783	Cluster 1
TR14441_c1_g1	-1.03752830807602	-0.540469767177673	1.22853770370507	0.349460371548616	Cluster 1
TR14452_c0_g1	0.263411499775048	-0.767273690628045	1.30430149404352	-0.800439303190521	Cluster 1
TR14480_c1_g1	-0.474375587098385	-0.497329244538629	1.49963895276264	-0.527934121125622	Cluster 1
TR14491_c0_g1	-0.630299381862763	-0.639823603499114	1.46775058431615	-0.197627598954272	Cluster 1
TR145494_c0_g1	-0.421121827792972	-1.04123528849911	1.30964260731221	0.152714508979869	Cluster 1
TR14582_c0_g1	0.511734468742065	-0.98148628705518	1.14714755631536	-0.677395738002246	Cluster 1
TR14611_c0_g1	-0.515712713646025	0.3607977112374	1.21584804920708	-1.06093304679845	Cluster 1
TR1463_c0_g4	-0.852629785832154	-0.49333534444972	1.42259300405609	-0.0766278737742176	Cluster 1
TR146508_c0_g1	-0.5	-0.5	1.5	-0.5	Cluster 1
TR14651_c0_g1	0.0974315238558012	-1.13410293768152	1.28219885394234	-0.245527440116619	Cluster 1
TR1468_c1_g1	-1.2039491949594	0.634141179024417	0.98705453082931	-0.417246514894327	Cluster 1
TR1471_c7_g1	-0.43993161174079	-0.700631826105703	1.48273246920044	-0.342169031353948	Cluster 1
TR14711_c0_g1	0.372006898730831	-0.982775697782155	1.22984195187682	-0.61907315282549	Cluster 1
TR14736_c0_g1	-0.537352304967644	-0.523164785364538	1.49855675807808	-0.438039667745901	Cluster 1
TR14738_c0_g1	-0.643810888325621	-0.628750984505139	1.46708563051199	-0.194523757681231	Cluster 1
TR14747_c0_g1	-0.486819610863056	-0.388223233979399	1.49332429155039	-0.618281446707932	Cluster 1
TR14752_c0_g1	-0.69739830349557	-0.677401219524371	1.43229113943714	-0.0574916164171975	Cluster 1
TR14759_c1_g1	0.480957294591493	-0.361486000690129	1.08718877450242	-1.20666006840378	Cluster 1
TR14767_c3_g1	-0.722350662250696	-0.730086680052578	1.39345020656393	0.0589871357393473	Cluster 1
TR1477_c5_g1	-0.152757140534083	-0.654480029185916	1.45777825571728	-0.650541085997285	Cluster 1
TR14772_c0_g1	-1.49377155381733	0.56533508036779	0.559206786813668	0.369229686635874	Cluster 1
TR14799_c0_g1	0.392186728044673	0.310789482601439	0.7671073737226	-1.47008358436871	Cluster 1
TR148_c0_g1	0.488391744897217	0.111107123634555	0.833703093171517	-1.43320196170329	Cluster 1
TR14804_c4_g1	-0.543316534870374	-0.632056102403187	1.48617443990652	-0.310801802632954	Cluster 1
TR14843_c0_g1	-0.523377169300109	-0.53291086453826	1.49876498926045	-0.442476955422085	Cluster 1
TR1495_c0_g1	-1.03964627416026	0.736353234394435	0.967405738291245	-0.664112698525421	Cluster 1
TR1496_c1_g1	0.644778262129971	-1.09000341699826	1.0279202280724	-0.582695073204115	Cluster 1
TR14986_c1_g1	0.121649083978674	-0.724783197822517	1.36880776006255	-0.765673646218709	Cluster 1
TR14990_c1_g1	-0.0319648742372695	-0.531547131218048	1.412610326671	-0.849098321215687	Cluster 1
TR14993_c0_g1	0.38603388537554	-0.401568448167311	1.16742239380168	-1.15188783100991	Cluster 1
TR15044_c0_g1	-0.629259544048387	-0.638866559988057	1.46827226944624	-0.200146165409792	Cluster 1
TR15087_c1_g1	-1.00358495973465	-0.700395894193901	1.01087315842554	0.693107695503017	Cluster 1
TR15115_c0_g1	-0.420196449864368	-0.525929179114405	1.49757650136043	-0.551450872381655	Cluster 1
TR15125_c0_g1	-1.30967674448015	0.115668314828687	1.12546405288023	0.068544376771233	Cluster 1
TR15181_c0_g1	-0.713062537642274	-0.514084808667618	1.47215195209363	-0.245004605783741	Cluster 1
TR15224_c0_g2	-0.571909809964539	-0.0166575672805206	1.41219153722635	-0.823624159981293	Cluster 1
TR15231_c0_g4	-0.546600263960829	-0.482670408526814	1.49915510992765	-0.469884437440011	Cluster 1
TR15263_c0_g1	-0.579913352126178	-0.118081904279086	1.44584731683947	-0.747852060434211	Cluster 1
TR15276_c0_g1	0.0140978770241529	-0.590217090339542	1.40284397194072	-0.826724758625333	Cluster 1
TR15314_c0_g1	-0.030343821621074	-0.960887684667337	1.38570118736237	-0.394469681073959	Cluster 1
TR15375_c0_g1	-0.992611769323445	-0.647508089947586	1.17393743136839	0.466182427902643	Cluster 1
TR15428_c0_g1	-1.27290435532705	0.739074671109651	0.854705649640496	-0.320875965423095	Cluster 1
TR15444_c0_g1	-1.0727745767034	-0.475155862740776	1.23512532803751	0.312805111406667	Cluster 1
TR15444_c1_g1	-0.945132161722357	-0.446672627042153	1.38097482709115	0.0108299616733566	Cluster 1
TR1545_c0_g1	-0.634781962994833	-0.846314315358972	1.36663952475817	0.114456753595631	Cluster 1
TR1545_c2_g1	0.334083164450721	-0.746247068485709	1.26593199096461	-0.853768086929619	Cluster 1
TR15456_c2_g1	-0.53603910769408	0.661034774062206	1.00236909375978	-1.12736476012791	Cluster 1
TR1551_c0_g1	-1.05351174344226	-0.61621967621415	1.07609672999545	0.593634689660961	Cluster 1
TR15554_c0_g1	-0.74859403300748	-0.904620283789526	1.18347571071914	0.469738606077864	Cluster 1
TR1556_c0_g3	-0.863621813532187	-0.848788614444802	1.03997206934887	0.672438358628115	Cluster 1
TR1556_c2_g2	-1.19373823540397	0.773986558210757	0.876148342077888	-0.45639666488468	Cluster 1
TR156_c0_g3	-0.598083822935785	-0.222605189702557	1.47241264032173	-0.651723627683389	Cluster 1
TR15683_c0_g1	-0.699270405072329	-0.018065587024553	1.42013138975937	-0.702795397662485	Cluster 1
TR1569_c1_g1	-0.754762967210824	-0.898128688538911	1.18538336375468	0.467508291995058	Cluster 1
TR15762_c0_g1	-0.453001987378037	-0.762950715584062	1.46629590651312	-0.25034320355102	Cluster 1
TR15779_c0_g1	-1.08884261074916	-0.572682156681977	1.06111498305134	0.600409784379801	Cluster 1
TR15786_c0_g2	-0.486335200469494	-0.405279333724579	1.49503043107289	-0.603415896878817	Cluster 1
TR1582_c0_g1	-0.501029218058426	-0.502568872505725	1.49999483953992	-0.496396748975765	Cluster 1
TR15862_c0_g1	-0.470945620380489	-0.476113747901811	1.49897231983017	-0.551912951547871	Cluster 1
TR159_c12_g1	-0.0368601937258788	0.0939340420756266	1.19379466131556	-1.2508685096653	Cluster 1
TR159_c5_g1	-0.997686130004006	-0.695307497710778	1.05632550336788	0.636668124346909	Cluster 1
TR15927_c0_g2	-1.15077559200293	0.697714335308865	0.963510272569384	-0.510449015875317	Cluster 1
TR15950_c0_g1	-0.774933625700367	0.368657744265223	1.24741742855457	-0.841141547119427	Cluster 1
TR15966_c0_g1	-0.386457781648495	-0.591326967100709	1.49461383023093	-0.516829081481722	Cluster 1
TR1599_c2_g1	-0.226697636125846	0.0579777229673765	1.29494113123593	-1.12622121807746	Cluster 1
TR15992_c0_g1	-0.51231480858058	-0.51231480858058	1.49976965505108	-0.475140037889925	Cluster 1
TR16077_c0_g1	-0.938775709206142	-0.334040299587071	1.41006391949587	-0.137247910702652	Cluster 1
TR16096_c0_g1	0.740845848821562	-0.882867799811675	0.982495138565934	-0.84047318757582	Cluster 1
TR161_c0_g1	0.0463103374320188	-0.991662141770552	1.3580053697244	-0.412653565385867	Cluster 1
TR16116_c0_g1	-0.371978234548726	-0.36517625948648	1.47685972871875	-0.739705234683548	Cluster 1
TR16120_c0_g1	-0.786076145368046	-0.821524900514294	1.25931702657046	0.348284019311885	Cluster 1
TR16124_c0_g1	-0.36773319043976	-0.681616898564584	1.48634102071051	-0.436990931706169	Cluster 1
TR16144_c1_g1	-0.0483582548034819	-0.815642564352061	1.42173269122237	-0.557731872066824	Cluster 1
TR16145_c0_g1	-0.739476727941491	-0.779996000705409	1.34726581940025	0.172206909246649	Cluster 1
TR1615_c0_g1	-0.148940188752831	-0.631506400312004	1.45663504600269	-0.676188456937853	Cluster 1
TR16153_c2_g1	-0.822837105446367	-0.685109006251482	1.35256056388823	0.155385547809615	Cluster 1
TR1618_c0_g1	0.651637314013494	-0.540636812626302	1.01148618131115	-1.12248668269834	Cluster 1
TR1619_c3_g1	-0.758043986335595	-0.787861925438656	1.3250989316921	0.220806980082155	Cluster 1
TR162422_c0_g1	0.577331189222364	-0.816712414021881	1.11241863289187	-0.873037408092356	Cluster 1
TR16275_c0_g1	-0.45680997359756	-0.631092169187687	1.49297208956699	-0.405069946781741	Cluster 1
TR1628_c0_g2	-0.0596981679379769	-0.708915744263477	1.43275603051145	-0.664142118309994	Cluster 1
TR16287_c0_g1	0.429674560933479	-0.794295590211608	1.21138778082492	-0.846766751546787	Cluster 1
TR162872_c0_g1	-0.523262414643993	-0.397531516425648	1.49582789203883	-0.575033960969193	Cluster 1
TR16372_c0_g1	-0.396913586279268	0.0915954429875235	1.33322255904062	-1.02790441574887	Cluster 1
TR1639_c0_g2	-0.607188877072313	-0.691125800993124	1.45874250846247	-0.160427830397033	Cluster 1
TR164_c0_g2	-1.27267225933861	-0.124322087310043	1.13954860832521	0.257445738323452	Cluster 1
TR16415_c4_g1	-0.538627016613309	-0.573946820981395	1.49478457772078	-0.382210740126072	Cluster 1
TR16421_c0_g1	-0.850735015896854	-0.762549069127058	1.25016548067769	0.363118604346218	Cluster 1
TR1643_c2_g1	-0.673796753397902	-0.43797550667397	1.48759332962481	-0.375821069552933	Cluster 1
TR164682_c0_g1	-0.180776080654775	-1.2821195874131	1.08743765440026	0.37545801366761	Cluster 1
TR16469_c0_g1	-0.130340307506434	-0.593891001745057	1.4502446423003	-0.726013333048812	Cluster 1
TR1650_c3_g1	-0.645232678433088	-0.661400921883384	1.45723779393682	-0.150604193620345	Cluster 1
TR16509_c0_g1	-0.462704618013811	0.138044103052715	1.3272650275629	-1.00260451260181	Cluster 1
TR16520_c0_g1	-0.499932675233438	-0.479834879244154	1.49979802570031	-0.520030471222722	Cluster 1
TR16523_c2_g1	-0.183850799954833	-0.548269349865305	1.46095724964108	-0.728837099820945	Cluster 1
TR16539_c0_g1	0.175553704826299	-0.772436301235717	1.34591173700163	-0.74902914059221	Cluster 1
TR16540_c0_g1	0.732353799287651	-0.967103775583015	0.98363546405452	-0.748885487759156	Cluster 1
TR16545_c0_g1	-0.920446258736685	-0.415685407171406	1.40541256710333	-0.0692809011952341	Cluster 1
TR1658_c0_g1	-0.951396835331421	-0.351792505269566	1.40057226216473	-0.0973829215637431	Cluster 1
TR16593_c0_g1	-0.40267996193516	-0.656458973315518	1.49030429642241	-0.43116536117173	Cluster 1
TR1661_c0_g1	-1.10606265757781	-0.469780746950305	1.18433703339375	0.391506371134365	Cluster 1
TR16625_c0_g1	-0.283442870043504	-0.887777945456482	1.43579608148613	-0.264575265986145	Cluster 1
TR16633_c0_g1	0.157638873309049	-0.472916619927147	1.31992107386583	-1.00464332724774	Cluster 1
TR16650_c0_g1	-0.52329339441022	-0.861736496047313	1.40820354232122	-0.0231736518636865	Cluster 1
TR16738_c0_g1	-0.0725174950888741	-0.629605536831218	1.43546220411023	-0.733339172190137	Cluster 1
TR1674_c1_g1	-0.0399702659564308	-0.998667406660795	1.37421113397625	-0.335573461359026	Cluster 1
TR16759_c0_g1	-0.556263041580664	-0.438018061868065	1.49824348092574	-0.503962377477014	Cluster 1
TR1678_c0_g1	-0.53829769226246	-0.499029775501673	1.49927087743617	-0.46194340967204	Cluster 1
TR16785_c0_g1	-0.453321280454826	-0.632388838619525	1.49290793757766	-0.407197818503312	Cluster 1
TR168_c11_g1	-0.825192806100886	-0.825192806100886	1.19682927567659	0.453556336525184	Cluster 1
TR1685_c2_g1	-1.46639109294088	0.590554033712252	0.680197107547548	0.195639951681084	Cluster 1
TR16865_c0_g1	0.118108405550712	-0.507866143868064	1.34643582327812	-0.956678084960773	Cluster 1
TR16875_c0_g1	0.667139296296573	-1.23323071591559	0.944043974926784	-0.377952555307766	Cluster 1
TR16887_c0_g1	-0.604639323899092	-0.8076699068873	1.40785680572086	0.00445242506553085	Cluster 1
TR1689_c2_g2	-0.704820590777372	-0.933478964255949	1.19982827841781	0.438471276615513	Cluster 1
TR169_c0_g4	-1.14018979559797	0.255814684984849	1.2306881605138	-0.346313049900681	Cluster 1
TR16926_c0_g1	0.0152725421390736	0.454157174135601	0.923586890410276	-1.39301660668495	Cluster 1
TR16930_c0_g1	0.0756649908457977	-0.731428244842712	1.38719149883963	-0.731428244842712	Cluster 1
TR16939_c0_g1	-0.693546697550001	-0.747004658010244	1.39975449099848	0.0407968645617648	Cluster 1
TR1697_c0_g2	0.300416476172344	-0.176305686891515	1.13606073111826	-1.26017152039909	Cluster 1
TR16973_c0_g1	-0.665992339486015	-0.853036996533152	1.34048670883781	0.178542627181357	Cluster 1
TR16975_c0_g1	0.488425080849054	-0.31930959409724	1.06548188628592	-1.23459737303773	Cluster 1
TR1699_c2_g1	-1.28823510754889	-0.0398338557323051	1.14204075042826	0.186028212852931	Cluster 1
TR16996_c0_g1	-0.230780380054504	-0.668635602635253	1.47322943521198	-0.573813452522225	Cluster 1
TR170_c0_g2	-0.0674253237744989	-0.695444053788403	1.43519617748576	-0.67232679992286	Cluster 1
TR17007_c0_g2	-0.676240692732268	-0.51105212656866	1.48153495277985	-0.294242133478926	Cluster 1
TR17008_c2_g1	-1.27884475568909	0.45980935036012	1.04894008050902	-0.22990467518006	Cluster 1
TR1704_c0_g1	-0.639463714372538	-0.446202679493271	1.4922155138709	-0.40654912000509	Cluster 1
TR1706_c0_g1	-0.645142109600097	-0.658868073758323	1.45806440731656	-0.154054223958139	Cluster 1
TR17079_c0_g1	-0.82874327192233	-0.682278128746398	1.34968588815288	0.161335512515846	Cluster 1
TR1709_c1_g1	0.128978011792703	-0.955954675640036	1.34288871101815	-0.515912047170813	Cluster 1
TR17106_c0_g2	-0.237294623997521	-1.30605466278951	0.924888495108448	0.618460791678578	Cluster 1
TR1714_c3_g1	0.243480838732322	-1.41925742467869	0.930816968964836	0.244959616981531	Cluster 1
TR17212_c1_g1	-0.667068585068117	-0.554776478563665	1.47717592485024	-0.255330861218458	Cluster 1
TR17235_c0_g1	-0.495712852717476	-0.495712852717476	1.4999725478668	-0.508546842431844	Cluster 1
TR17281_c0_g1	0.45326837774309	-0.910611444246907	1.19323185669082	-0.735888790187002	Cluster 1
TR17351_c0_g1	-0.451412876317967	-0.978061232022262	1.3542386289539	0.0752354793863278	Cluster 1
TR17351_c0_g2	-0.41382887666943	-0.915439636268739	1.40869021654139	-0.0794217036032239	Cluster 1
TR17367_c0_g1	-0.789520582684293	-0.582733592109708	1.42624128467502	-0.053987109881023	Cluster 1
TR17379_c0_g1	-1.3982958113242	0.0672402349520716	0.943370460521604	0.387685115850527	Cluster 1
TR17385_c0_g1	0.204257299282395	-0.986328034432103	1.30744647804721	-0.525375742897505	Cluster 1
TR174_c0_g1	-0.940942601351718	-0.723663870886913	1.15283425585458	0.511772216384045	Cluster 1
TR17421_c2_g3	-0.755746035926355	-0.964991099499633	0.953029137674199	0.76770799775179	Cluster 1
TR17479_c2_g4	-1.28396901028691	-0.252776167605375	0.999386569936483	0.537358607955798	Cluster 1
TR175_c0_g1	-0.863501530441977	-0.155863027681967	1.4344848991779	-0.415120341053953	Cluster 1
TR175_c0_g2	-0.495179873154197	-0.553298476345035	1.49866317502181	-0.450184825522581	Cluster 1
TR17554_c0_g1	-0.326976508356201	-0.810218898215968	1.46023243892408	-0.32303703235191	Cluster 1
TR17564_c0_g1	-0.31594777820721	-0.80515724123773	1.46151327080368	-0.340408251358737	Cluster 1
TR17578_c0_g2	-0.00294323099938463	-0.309039254935399	1.3509430287176	-1.03896054278282	Cluster 1
TR17614_c0_g1	-0.381187246402439	-0.551032703027323	1.49483302449969	-0.562613075069928	Cluster 1
TR1764_c2_g1	-0.204574018269829	0.0262274382397218	1.30193003421978	-1.12358345418967	Cluster 1
TR17682_c0_g1	0.36614878089429	0.0586647218007427	0.964933527550147	-1.38974703024518	Cluster 1
TR17691_c0_g1	-1.29873634484745	0.607132844136005	0.939736054401817	-0.248132553690367	Cluster 1
TR17705_c0_g1	-0.829215711092227	-0.891903500494649	0.994320175537459	0.726799036049416	Cluster 1
TR17775_c0_g1	-0.776588032479708	-0.606886475522496	1.42372051080798	-0.0402460028057771	Cluster 1
TR1779_c1_g1	-0.632023103387594	0.0497295163163122	1.39308618869744	-0.810792601626155	Cluster 1
TR178304_c0_g1	-0.5	-0.5	1.5	-0.5	Cluster 1
TR178557_c0_g1	-0.5	-0.5	1.5	-0.5	Cluster 1
TR1786_c1_g1	-0.967914637535948	-0.751654906103062	0.959022992454033	0.760546551184977	Cluster 1
TR17877_c0_g1	-0.442630076833065	-0.523324031858932	1.49877154702456	-0.532817438332563	Cluster 1
TR17887_c0_g1	-0.537906092710893	-0.62598428333022	1.48789229153364	-0.324001915492526	Cluster 1
TR179_c0_g1	-0.71587614195761	-1.00155283295999	0.928112362867396	0.789316612050202	Cluster 1
TR1793_c1_g1	0.657051701390516	-0.198741097228257	0.871699078168263	-1.33000968233052	Cluster 1
TR17934_c0_g1	0.19952652597473	-1.11908355872783	1.26135464681416	-0.341797614061059	Cluster 1
TR17934_c1_g1	-0.076888204580585	-0.292175177406223	1.37629886199247	-1.00723548000566	Cluster 1
TR17934_c1_g2	-0.076888204580585	-0.292175177406223	1.37629886199247	-1.00723548000566	Cluster 1
TR1795_c1_g3	-0.583998814373369	-1.06939018958071	1.09918524314167	0.554203760812411	Cluster 1
TR17951_c0_g1	-0.555378530172337	-0.491610056754591	1.49863061463701	-0.451642027710078	Cluster 1
TR17956_c0_g1	0.505970168838906	-0.702162683286645	1.15443805869775	-0.95824554425001	Cluster 1
TR17964_c0_g1	-0.215102016964282	-0.908345088780598	1.42704823826018	-0.303601132515301	Cluster 1
TR17974_c0_g1	-0.463716873212625	-0.549989779856834	1.49899175294314	-0.485285099873677	Cluster 1
TR17978_c0_g1	-0.807853925417211	-0.268376430534891	1.45904140661355	-0.382811050661444	Cluster 1
TR1801_c0_g1	-0.299742841249435	0.295646030438412	1.19005919278842	-1.1859623819774	Cluster 1
TR18027_c0_g1	-0.00665697877060274	0.0490694826905292	1.2028542980656	-1.24526680198552	Cluster 1
TR18029_c0_g1	-0.170775405714935	-1.25900028402865	1.14128248844029	0.288493201303291	Cluster 1
TR18048_c0_g1	-0.904630885121664	-0.567120474682999	1.35916987060841	0.112581489196253	Cluster 1
TR18050_c0_g1	-0.525666440980095	-0.492553594304184	1.49973601402983	-0.481515978745547	Cluster 1
TR1810_c0_g2	-0.84797985433411	-0.836709849001874	1.12673639247364	0.557953310862346	Cluster 1
TR18139_c0_g1	-0.763351553368673	-0.81911405560539	1.28834841884978	0.294117190124287	Cluster 1
TR18162_c0_g1	-0.742610239389846	-0.791367477329584	1.33519820819589	0.198779508523545	Cluster 1
TR1819_c0_g1	-0.456533068982522	0.456533068982522	1.1364759376799	-1.1364759376799	Cluster 1
TR18190_c0_g1	-1.15863336820765	0.0155691190501703	1.28006172232213	-0.136997473164647	Cluster 1
TR18224_c0_g2	-0.495497150257728	-0.410352055225374	1.49595201688789	-0.590102811404788	Cluster 1
TR1824_c0_g1	-1.3709577268457	0.580072221349015	0.880850410196651	-0.0899649046999626	Cluster 1
TR18343_c0_g1	-0.518852642955619	-0.527652877644063	1.49915938321238	-0.452653862612696	Cluster 1
TR1836_c6_g1	-0.553310041495532	-0.425495421910064	1.4978102823284	-0.519004818922809	Cluster 1
TR1838_c0_g1	-0.670340328987346	-0.805762617671658	1.37521334158919	0.100889605069813	Cluster 1
TR1839_c3_g1	-0.063939418552553	-1.08610606919674	1.33495137383371	-0.18490588608441	Cluster 1
TR18392_c0_g1	-0.284425865782094	-0.93636829970959	1.41573773642098	-0.1949435709293	Cluster 1
TR18400_c1_g1	-0.567985737861656	-0.390815874675452	1.49552208042473	-0.53672046788762	Cluster 1
TR18445_c2_g1	-0.628680132631499	-0.775243599134548	1.41549453175313	-0.0115707999870828	Cluster 1
TR184816_c0_g1	-0.533452639832334	-0.533452639832334	1.49826172048603	-0.431356440821361	Cluster 1
TR1851_c0_g1	-0.943060840866302	-0.665571723511185	1.23663628386519	0.371996280512294	Cluster 1
TR18533_c0_g1	0.403284672288331	-0.678735306893158	1.2191002130305	-0.943649578425669	Cluster 1
TR185397_c0_g1	-0.5	-0.5	1.5	-0.5	Cluster 1
TR1863_c0_g1	0.347993849220719	-0.328075254132673	1.16712789831599	-1.18704649340404	Cluster 1
TR18654_c0_g1	0.405004408826735	-0.813510296692318	1.22668482327636	-0.818178935410781	Cluster 1
TR18674_c0_g1	0.311525829922742	-1.21427837879238	1.1658686095382	-0.26311606066856	Cluster 1
TR18686_c0_g1	-0.557138568000541	-0.927892624102167	1.3449909372165	0.140040254886212	Cluster 1
TR18731_c0_g1	-0.508051011576333	-0.543525895177673	1.49881383215661	-0.447236925402608	Cluster 1
TR18749_c1_g1	-0.487618199737583	-0.509866938889107	1.49993583113196	-0.502450692505266	Cluster 1
TR1875_c0_g2	-0.727842074708075	-0.530084340583212	1.46504546227413	-0.207119046982844	Cluster 1
TR18754_c0_g1	-0.152310380417754	-0.621520808154307	1.45722070939218	-0.683389520820123	Cluster 1
TR1876_c5_g1	-0.288557421877185	0.512381429721085	1.03463744802352	-1.25846145586742	Cluster 1
TR18762_c0_g1	-1.46173189909251	0.647309179766119	0.644580795446767	0.169841923879624	Cluster 1
TR18782_c0_g1	-0.359892134036727	-0.454171181744081	1.48704477088525	-0.672981455104446	Cluster 1
TR1883_c1_g1	-0.642776088056208	0.0401570296981115	1.39758765284128	-0.794968594483187	Cluster 1
TR1885_c0_g1	-0.683173652283349	-0.701391616344239	1.42808596055082	-0.0435206919232355	Cluster 1
TR1885_c1_g1	-0.00439822183582404	0.347459525030091	1.01598924407533	-1.3590505472696	Cluster 1
TR18884_c0_g1	-0.550576800319668	-0.443826398571703	1.49856678105975	-0.504163582168379	Cluster 1
TR189_c4_g1	0.466421986789788	-0.94392631417479	1.18147387562868	-0.703969548243679	Cluster 1
TR18928_c0_g1	-0.47709706127757	-0.82233312571963	1.44088107451166	-0.141450887514455	Cluster 1
TR1897_c4_g1	-0.842982640701983	-0.65395016975669	1.35728720129188	0.139645609166793	Cluster 1
TR1904_c1_g1	-1.4830858651494	0.335852248827482	0.695245543133527	0.451988073188387	Cluster 1
TR1905_c1_g3	0.258083158595488	-0.334695550502395	1.22541133923825	-1.14879894733134	Cluster 1
TR19063_c0_g1	0.181576470571474	-0.571253718203715	1.32726411719573	-0.937586869563492	Cluster 1
TR1915_c2_g1	-0.421971215196425	-0.0631937568651649	1.40453220903544	-0.919367236973853	Cluster 1
TR19170_c0_g1	-0.287832019684469	-1.15875893699106	1.23716207407055	0.20942888260498	Cluster 1
TR19187_c0_g1	-0.516123721195186	-0.467356125491704	1.49960356788208	-0.516123721195186	Cluster 1
TR191928_c0_g1	-0.613915541121428	-0.565448524717105	1.48632183639925	-0.306957770560714	Cluster 1
TR192_c2_g1	-0.0432245645357995	-0.174388760368572	1.32207547390533	-1.10446214900096	Cluster 1
TR192452_c0_g1	-0.483004598154303	-0.838902723110106	1.43206626470311	-0.110158943438701	Cluster 1
TR19257_c1_g1	-0.469399396448877	-0.745188952819433	1.46948475742898	-0.254896408160666	Cluster 1
TR19298_c0_g1	-0.928512832705108	-0.741863494156958	1.14536870671878	0.525007620143286	Cluster 1
TR1930_c8_g1	0.16920672002667	-0.927062170286967	1.3341115756469	-0.576256125386603	Cluster 1
TR19307_c0_g1	0.60248637083896	-1.29613844252855	0.945348680559816	-0.251696608870224	Cluster 1
TR19318_c0_g1	-1.19837454179182	-0.354297518861395	1.11763975265274	0.435032308000471	Cluster 1
TR19368_c0_g2	-0.704214241694361	-0.613164319535898	1.45253078943423	-0.135152228203968	Cluster 1
TR19399_c1_g3	-0.321426843792608	-0.600436655413171	1.48836652888131	-0.566503029675535	Cluster 1
TR19404_c0_g1	-0.649083021705698	-0.0562630103381261	1.43127609226013	-0.725930060216309	Cluster 1
TR19456_c0_g1	-0.226942124111784	-0.0458913436569538	1.34247896410171	-1.06964549633297	Cluster 1
TR1946_c0_g1	0.548099229730115	-0.109883038853456	0.919201229211249	-1.35741742008791	Cluster 1
TR19468_c0_g1	-0.51041095212252	-0.609563631563539	1.49292386658353	-0.37294928289747	Cluster 1
TR1947_c3_g1	-0.497374245418129	-0.456117395567778	1.49899887789611	-0.545507236910206	Cluster 1
TR19508_c1_g1	-0.629485247210469	-0.913938831723987	1.30901325465943	0.234410824275029	Cluster 1
TR19521_c2_g1	-1.04764682561102	0.765025821492696	0.940445755083378	-0.657824750965057	Cluster 1
TR195836_c0_g1	-0.505222894691387	-0.502290735622554	1.49997767067878	-0.492464040364841	Cluster 1
TR19606_c0_g1	-0.488561072801861	-0.511395475425512	1.49993482234106	-0.499978274113687	Cluster 1
TR19614_c3_g2	-1.2243535008975	0.116469822591177	1.21488440962992	-0.107000731323602	Cluster 1
TR19632_c0_g1	-0.220253954479496	-1.02947751797015	1.37010055120416	-0.120369078754516	Cluster 1
TR19635_c1_g1	-1.15096865995098	0.218551378511281	1.23847978656105	-0.30606250512135	Cluster 1
TR19646_c0_g1	-0.408068592162379	0.680114320270632	0.944236386395148	-1.2162821145034	Cluster 1
TR19649_c0_g1	-0.51541425204938	-0.543464007262951	1.49855817228507	-0.439679912972736	Cluster 1
TR19653_c0_g1	-0.705449308559497	-0.493305953153346	1.47701178609831	-0.278256524385466	Cluster 1
TR1966_c0_g1	0.632397082219269	-0.808393624561645	1.0706188201906	-0.89462227784822	Cluster 1
TR1966_c0_g2	-0.531933492977838	-0.669880882119438	1.48014761732995	-0.278333242232674	Cluster 1
TR1966_c0_g3	0.156451962913632	-0.538760487386645	1.33399721220579	-0.951688687732782	Cluster 1
TR1966_c3_g1	-0.130551619183297	0.382329741893943	1.05840062695031	-1.31017874966095	Cluster 1
TR1969_c6_g1	0.226158570623676	-0.197687847012168	1.19186714731726	-1.22033787092877	Cluster 1
TR19740_c0_g1	-0.220015937049036	0.554447731261771	0.970382096090907	-1.30481389030364	Cluster 1
TR19740_c0_g2	0.243604788898842	-0.507104705747679	1.28257258184308	-1.01907266499425	Cluster 1
TR1975_c0_g1	0.435147301683631	-1.09678250090518	1.16413458705348	-0.502499387831933	Cluster 1
TR19784_c0_g1	0.111304516150624	-1.43304564543929	0.834783871129682	0.486957258158981	Cluster 1
TR1980_c1_g1	-0.981006155946396	0.687859593523166	1.01878559712533	-0.725639034702103	Cluster 1
TR1980_c1_g2	-1.18769497634265	0.496005271591151	1.08885968732005	-0.397169982568547	Cluster 1
TR1983_c0_g1	-1.47772276207536	0.315955372567909	0.725202625127323	0.436564764380129	Cluster 1
TR19861_c0_g1	-0.543011520547562	-0.521228823448233	1.49833837904671	-0.434098035050916	Cluster 1
TR19874_c0_g2	-0.0302689466646307	-1.33304441111033	1.06425616472841	0.299057193046551	Cluster 1
TR19874_c2_g1	-0.53718648466969	-0.917495500365045	1.36435859380709	0.0903233912276468	Cluster 1
TR19889_c0_g2	-0.713392766329929	-0.747981506515622	1.38787319995095	0.0735010728945987	Cluster 1
TR19896_c0_g1	-0.877245261974583	-0.741120997185424	1.24024330141234	0.378122957747665	Cluster 1
TR1993_c0_g1	-1.14322455304829	0.673129268891365	0.98652612499598	-0.516430840839057	Cluster 1
TR1993_c1_g1	-1.28514789415527	-0.285846638302167	0.913314868721559	0.657679663735881	Cluster 1
TR2000_c0_g1	-0.743397427882332	0.359192485754086	1.25147358253022	-0.867268640401979	Cluster 1
TR20029_c0_g1	-0.433389588064511	-0.553775584749098	1.49813684763041	-0.5109716748168	Cluster 1
TR20030_c0_g1	0.550647817707087	-0.828960767790645	1.13185027909877	-0.853537329015207	Cluster 1
TR20040_c0_g1	-0.5	-0.5	1.5	-0.5	Cluster 1
TR20047_c0_g1	-0.745256046332841	-0.745256046332841	1.36910446607011	0.121407626595576	Cluster 1
TR2008_c1_g1	-0.678117200385298	-0.598077137389001	1.46517781984889	-0.188983482074591	Cluster 1
TR20108_c0_g2	-0.128094445928155	-0.666091118826408	1.45173705385243	-0.657551489097864	Cluster 1
TR2016_c0_g1	-1.06199457400277	-0.635357531710507	0.966968584959816	0.73038352075346	Cluster 1
TR2016_c1_g1	0.201767453764909	-0.861985115931431	1.32969071212042	-0.669473049953903	Cluster 1
TR20171_c0_g1	-0.075659024657412	-0.426441775341777	1.41000909588813	-0.907908295888945	Cluster 1
TR2019_c0_g1	-1.14210417403632	-0.167109286232027	1.29125914701089	0.0179543132574654	Cluster 1
TR2019_c0_g3	-1.11667481630066	-0.197191980971004	1.30924839033622	0.00461840693544576	Cluster 1
TR2019_c0_g4	-1.22751118520607	-0.373057477028593	0.991509836428751	0.609058825805913	Cluster 1
TR20213_c0_g1	-1.49552267261934	0.523014090516696	0.578400169067739	0.39410841303491	Cluster 1
TR20246_c0_g1	-0.502127227157956	-0.500694932226076	1.49999675225946	-0.497174592875431	Cluster 1
TR2028_c1_g1	-1.02120338286472	0.788465793539404	0.92518952588233	-0.692451936557012	Cluster 1
TR2028_c2_g1	-0.715815739912248	-0.600568821764831	1.4520722338878	-0.135687672210725	Cluster 1
TR2028_c3_g1	-1.10056409309987	0.52787936145408	1.1067441441608	-0.534059412515006	Cluster 1
TR2029_c0_g1	-0.996992792741199	0.447061661118864	1.1846163552947	-0.634685223672367	Cluster 1
TR202901_c0_g1	-0.5	-0.5	1.5	-0.5	Cluster 1
TR20335_c0_g1	-0.555175553575586	-0.128538182354939	1.44673826522899	-0.763024529298465	Cluster 1
TR20345_c0_g1	-1.17124291990942	0.656141321624651	0.987278063379148	-0.472176465094375	Cluster 1
TR20349_c0_g1	-0.5	-0.5	1.5	-0.5	Cluster 1
TR20374_c0_g1	-0.246315613616452	-1.04877107218696	1.35492693571396	-0.0598402499105433	Cluster 1
TR20392_c0_g1	-0.283872612190741	-0.515380373589015	1.47999604608182	-0.680743060302067	Cluster 1
TR2045_c2_g1	-0.536411525642133	-0.172837498877392	1.45709283034177	-0.747843805822244	Cluster 1
TR20451_c0_g1	0.719831622081725	-0.793590460017993	0.998476120952071	-0.924717283015803	Cluster 1
TR20490_c0_g1	0.694859977153893	-0.849181611034864	1.02165873125477	-0.867337097373802	Cluster 1
TR20581_c0_g1	0.260942597003387	-0.441314332568826	1.25656566001229	-1.07619392444686	Cluster 1
TR20590_c0_g1	-0.330422873143396	-0.853003992894805	1.44697811116812	-0.263551245129917	Cluster 1
TR205905_c0_g1	-0.498267176765864	-0.480913125154775	1.49980185025333	-0.520621548332692	Cluster 1
TR20603_c0_g1	-0.73402183894197	-0.465328933800772	1.47301947242359	-0.27366869968085	Cluster 1
TR20614_c0_g1	0.104922903781999	-1.4204946973563	0.887809185847685	0.427762607726612	Cluster 1
TR20621_c0_g1	-1.00016163295503	-0.715198802351899	0.949703773254618	0.765656662052308	Cluster 1
TR20641_c0_g1	0.317743771711228	-0.917479554603588	1.26874060181178	-0.669004818919421	Cluster 1
TR2065_c0_g1	-1.22701278323885	0.746595079748508	0.881159252224919	-0.400741548734575	Cluster 1
TR20670_c0_g1	-0.759615963455585	0.294596683074935	1.28798936922869	-0.822970088848044	Cluster 1
TR2068_c0_g2	-0.568474703438533	0.0614972634326645	1.38143852735327	-0.8744610873474	Cluster 1
TR20698_c0_g1	0.622858702540748	-0.983044976224396	1.06913828066585	-0.708952006982205	Cluster 1
TR20715_c0_g1	-1.47603722986738	0.383627067472778	0.743010045179619	0.349400117214984	Cluster 1
TR20726_c0_g1	-0.352457545609393	-0.553861857386188	1.49198194118863	-0.585662538193051	Cluster 1
TR20750_c0_g1	-0.450212059377706	-0.638947245841723	1.49218756798113	-0.403028262761702	Cluster 1
TR20755_c0_g1	-0.114502681988187	-0.0641812053602314	1.30729225934744	-1.12860837199902	Cluster 1
TR20761_c0_g1	-0.596719221325971	-0.90192642961073	1.34408559033096	0.154560060605744	Cluster 1
TR20793_c3_g1	0.0522885391369193	-1.00227023337237	1.35291102523171	-0.402929330996259	Cluster 1
TR20797_c0_g1	-0.166016677671401	-1.26169702484558	1.13893088719422	0.288782815322767	Cluster 1
TR20799_c0_g1	-1.21731535259958	0.762359109708825	0.873024141763332	-0.418067898872581	Cluster 1
TR2082_c0_g1	0.493568283351208	-0.0675293646854267	0.94046993257021	-1.36650885123599	Cluster 1
TR208211_c0_g1	-0.56513508722034	-0.475560361580228	1.49834086525277	-0.457645416452206	Cluster 1
TR2084_c2_g1	-1.36077147802581	-0.0609061438927924	0.969689922503667	0.451987699414933	Cluster 1
TR20874_c0_g1	-0.808010733339025	-0.20299777044478	1.45282718063421	-0.441818676850403	Cluster 1
TR20892_c0_g2	-0.245283672276541	-0.646102461787053	1.47649443222948	-0.585108298165888	Cluster 1
TR20931_c0_g1	0.447727007334538	-0.678433500196877	1.19068011994207	-0.95997362707973	Cluster 1
TR2094_c2_g1	-0.541328561761516	0.459772469594056	1.15707705762584	-1.07552096545838	Cluster 1
TR21014_c0_g2	-0.547028096362105	-0.668125919220892	1.47822859627622	-0.263074580693226	Cluster 1
TR2102_c0_g1	-0.674338946333526	-0.332036072261865	1.48518132117949	-0.478806302584097	Cluster 1
TR21022_c0_g1	-0.572076146495494	-0.509758483478556	1.49687026566686	-0.415035635692809	Cluster 1
TR2103_c3_g1	0.537834615061856	-0.275715778788733	1.00919528893629	-1.27131412520942	Cluster 1
TR2110_c1_g1	-1.20582418775435	0.766984545428851	0.875709627369459	-0.436869985043963	Cluster 1
TR21108_c0_g1	-0.533085763658349	-0.236197062833688	1.4718701110198	-0.702587284527763	Cluster 1
TR21134_c0_g2	-0.523231375766102	-0.458599707188272	1.4993596644342	-0.517528581479823	Cluster 1
TR21141_c1_g1	-0.391450511330492	-0.506196310071644	1.49468355547719	-0.597036734075056	Cluster 1
TR21190_c0_g2	-0.494002090871651	-0.467111722448436	1.49935489740412	-0.538241084084038	Cluster 1
TR2121_c1_g1	-0.707387925284619	-0.657609678731303	1.43600480865815	-0.0710072046422296	Cluster 1
TR2124_c2_g1	-0.13670297347505	-0.559415714149672	1.44943932868936	-0.753320641064636	Cluster 1
TR21242_c0_g1	-0.388234664412279	0.687498884896744	0.930145550154418	-1.22940977063888	Cluster 1
TR21286_c0_g1	-0.987374959557811	-0.721013342560821	1.00574472624726	0.702643575871373	Cluster 1
TR2131_c1_g1	-1.36482749109252	0.22701757630059	1.03709468309982	0.100715231692108	Cluster 1
TR2131_c4_g1	-1.44314297845871	0.442165987760846	0.832791154862452	0.168185835835414	Cluster 1
TR21345_c0_g1	0.576285926019762	-0.429670855660728	1.03856689519451	-1.18518196555354	Cluster 1
TR21381_c0_g1	-0.53620635484792	-0.466698123663931	1.49939184411178	-0.496487365599926	Cluster 1
TR21390_c0_g1	-0.540520161947081	-0.377569230771858	1.49437927126546	-0.57628987854652	Cluster 1
TR21390_c1_g1	-0.613878243975867	-0.504440339757328	1.49280141223101	-0.374482828497813	Cluster 1
TR21414_c0_g1	-1.32483648255585	0.716352085557339	0.826985612284341	-0.218501215285829	Cluster 1
TR21420_c0_g1	-0.694139020507566	-0.791722927523365	1.37040725322429	0.115454694806645	Cluster 1
TR2143_c1_g1	-0.994231875378565	-0.491607325384675	1.31996645738154	0.165872743381697	Cluster 1
TR2146_c0_g1	-0.479848448835203	-0.50595062376236	1.49984033066005	-0.514041258062491	Cluster 1
TR21467_c0_g1	-0.471362902843318	-0.592656443150441	1.49650611412326	-0.432486768129497	Cluster 1
TR21497_c0_g1	-0.582353122309761	-0.582353122309761	1.48884619005609	-0.324139945436565	Cluster 1
TR2152_c0_g1	-1.2703126287168	0.715269573079528	0.877795992686023	-0.322752937048748	Cluster 1
TR215570_c0_g1	-0.450830819909102	-0.524136644284565	1.49910410847823	-0.524136644284565	Cluster 1
TR21561_c0_g1	0.161359161002263	-0.361514423530701	1.28819367740218	-1.08803841487374	Cluster 1
TR216_c4_g1	-0.55099482476406	-0.545461532941543	1.49632314956717	-0.399866791861569	Cluster 1
TR2164_c1_g2	-0.546238653450274	-0.690338420924887	1.47283366988586	-0.236256595510701	Cluster 1
TR2165_c0_g2	-0.799272124476186	-0.544185276239105	1.43415494675514	-0.0906975460398509	Cluster 1
TR2165_c0_g3	0.445359891488139	0.107168734695273	0.872109643418416	-1.42463826960183	Cluster 1
TR2167_c1_g1	-0.791732679819759	-0.933058340152394	0.949313477890274	0.77547754208188	Cluster 1
TR21689_c0_g1	-0.960168139551616	-0.592088729091539	1.28738051869279	0.26487634995036	Cluster 1
TR21696_c0_g1	-0.45694985694927	-0.532478758924356	1.49924870420546	-0.509820088331831	Cluster 1
TR2170_c0_g1	-0.787245037724914	-0.709361674277653	1.36358192723465	0.133024784767922	Cluster 1
TR21756_c0_g1	-0.143583865751193	-0.748845084456221	1.45130153536206	-0.558872585154643	Cluster 1
TR21877_c0_g1	-0.494256187800349	-0.60430925546166	1.49455996350762	-0.395994520245608	Cluster 1
TR21882_c0_g2	0.289588954970381	-0.465860492778438	1.24649158878555	-1.07022005097749	Cluster 1
TR21886_c1_g2	-0.453253075320865	-0.636449440258915	1.49241866264187	-0.402716147062093	Cluster 1
TR21938_c1_g1	-0.759419153633809	-0.376672565848609	1.47249268783363	-0.33640096835121	Cluster 1
TR2194_c0_g3	-0.640192803757175	-0.389636416217054	1.4916598495503	-0.461830629576072	Cluster 1
TR2197_c1_g1	0.700325729060274	-1.01558623176058	1.00274381969263	-0.687483316992325	Cluster 1
TR21970_c0_g1	-0.979913572411235	-0.611233218434731	1.24294867875704	0.348198112088921	Cluster 1
TR2198_c0_g1	-0.60433539096074	-0.826947719154071	1.39632155857163	0.0349615515431839	Cluster 1
TR2198_c0_g2	-0.160022679106758	-0.694955634977922	1.45849241814445	-0.603514104059774	Cluster 1
TR2199_c0_g1	-0.461432576107278	0.515934087961289	1.09511433333526	-1.14961584518927	Cluster 1
TR2204_c0_g1	-0.342732294449952	-0.378882556744876	1.47405011832058	-0.752435267125756	Cluster 1
TR2207_c3_g1	-0.470177386225596	0.108179058817711	1.343261853932	-0.981263526524116	Cluster 1
TR22087_c0_g1	-0.45052173593138	0.531998706654996	1.07968292937276	-1.16115990009638	Cluster 1
TR2216_c0_g2	-0.868336642464462	-0.814797581657405	1.12933956389887	0.553794660223	Cluster 1
TR22202_c0_g1	-0.576303899574162	-1.07078687513471	1.11063010769786	0.536460667011009	Cluster 1
TR2223_c1_g1	0.0725995979455301	-0.358573637498284	1.3315289141201	-1.04555487456735	Cluster 1
TR2224_c2_g1	0.544557315732624	-1.12934318992478	1.08518989405456	-0.500404019862411	Cluster 1
TR22288_c0_g1	-1.11412605980849	0.462856267754024	1.14184903068648	-0.490579238632017	Cluster 1
TR22303_c0_g1	-0.667716365821713	-0.740287630683645	1.41635424664638	-0.00835025014101718	Cluster 1
TR2237_c3_g1	-0.671507178726398	0.245673358070634	1.30791816344271	-0.882084342786941	Cluster 1
TR22373_c0_g1	-0.516158689293364	-1.09400654114978	1.15179132633542	0.458373904107722	Cluster 1
TR22381_c0_g1	0.193121754309784	-0.63190779521624	1.33005271890052	-0.891266677994069	Cluster 1
TR2265_c7_g1	-0.275779454933694	-0.531670968405824	1.4796628447404	-0.67221242140088	Cluster 1
TR22661_c1_g1	-1.38069150395356	0.595125648255844	0.856980933488415	-0.0714150777907017	Cluster 1
TR22675_c1_g1	-0.620920420565066	-0.620920420565066	1.47468599884203	-0.2328451577119	Cluster 1
TR22750_c0_g1	-0.564655335903188	-0.295415705538754	1.484557406315	-0.624486364873062	Cluster 1
TR22759_c0_g1	-0.0278876658046006	0.155876373943602	1.153941251666	-1.28192995980501	Cluster 1
TR228_c4_g1	-0.161202332716209	-0.613295289677772	1.45915352059026	-0.68465589819628	Cluster 1
TR228_c4_g2	0.230207922939488	-0.516970826441052	1.29199561573546	-1.00523271223389	Cluster 1
TR228_c4_g3	-0.954786603332559	-0.683505786122835	1.19277796917919	0.445514420276202	Cluster 1
TR22907_c0_g1	-0.728451044083296	-0.581124819074071	1.45296039112233	-0.143384527964961	Cluster 1
TR2292_c2_g1	-0.533368119215462	0.588954871093997	1.06011876796919	-1.11570551984773	Cluster 1
TR22937_c0_g1	-0.663183228412951	-0.56919630667113	1.4754987663244	-0.243119231240323	Cluster 1
TR22953_c0_g1	-0.58166653756349	-0.314347447959843	1.48758123010918	-0.591567244585847	Cluster 1
TR2297_c1_g1	-0.470076861202526	-0.582224261968516	1.4973286673992	-0.445027544228155	Cluster 1
TR22991_c2_g1	0.108246186662855	-0.856128930878946	1.36783817692153	-0.619955432705444	Cluster 1
TR2301_c0_g1	-0.807421538780742	0.614629048908606	1.08425178064842	-0.891459290776288	Cluster 1
TR2317_c2_g1	-0.685549077683626	-0.450962270371804	1.48499622365418	-0.348484875598746	Cluster 1
TR23180_c0_g1	0.337231812673628	-0.845921372802106	1.2646192975261	-0.755929737397626	Cluster 1
TR232_c0_g1	-1.0608988707319	-0.0626501453841679	1.34898075471625	-0.225431738600175	Cluster 1
TR2325_c0_g1	0.296685998875474	-1.14682054974293	1.21101118802205	-0.3608766371546	Cluster 1
TR23293_c0_g1	0.569266575244881	-0.572706252436692	1.08521815401668	-1.08177847682486	Cluster 1
TR2331_c1_g1	-0.645762648214449	-0.74101559989624	1.42561502094953	-0.0388367728388456	Cluster 1
TR23379_c0_g2	-1.40155479315196	-0.0208058066459807	0.819937925548412	0.602422674249525	Cluster 1
TR2342_c0_g2	-0.702055933332399	-0.978709553484977	1.10187726108715	0.578888225730224	Cluster 1
TR23486_c1_g1	-0.535360349259868	-0.415787479374415	1.49737843879283	-0.546230610158545	Cluster 1
TR23518_c0_g1	-0.577809266288878	-0.139561154611535	1.4516968699312	-0.734326449030786	Cluster 1
TR23555_c1_g1	-0.501031862152749	-0.591105005910547	1.4955894911451	-0.403452623081802	Cluster 1
TR23563_c0_g1	0.364862136850508	0.19787783943806	0.873918253225716	-1.43665822951428	Cluster 1
TR2357_c3_g3	-0.769466220138031	-0.669101060989592	1.39953638590323	0.0390308952243929	Cluster 1
TR23619_c0_g1	-0.552867012548279	-0.592514846117478	1.49119907368599	-0.345817215020238	Cluster 1
TR2366_c3_g1	-0.216020571780603	-0.407856145397062	1.45044119084513	-0.826564473667469	Cluster 1
TR23750_c0_g2	-0.382184794276629	-0.578953203211131	1.49468310632939	-0.53354510884163	Cluster 1
TR23756_c0_g1	-0.527208799052261	-0.497401941155314	1.49965753794018	-0.475046797732603	Cluster 1
TR2377_c2_g2	-1.12312570550586	-0.552322568866036	0.960127097741025	0.715321176630873	Cluster 1
TR2379_c0_g1	-0.578045124217097	-0.577587266692964	1.49009731228875	-0.334464921378684	Cluster 1
TR2390_c0_g2	-1.10945101127116	-0.35728083413817	1.26525769082014	0.201474154589194	Cluster 1
TR2390_c1_g1	-1.02112846196491	-0.31160645142872	1.36354279651601	-0.0308078831223864	Cluster 1
TR23924_c3_g1	-0.528246610745179	-0.508560401649085	1.49943292615246	-0.4626259137582	Cluster 1
TR23954_c0_g1	-0.432722212129361	-0.621234858997598	1.49429595585706	-0.440338884730098	Cluster 1
TR240_c1_g2	-0.942530229944506	-0.765270003686909	1.0378943668645	0.66990586676691	Cluster 1
TR24041_c0_g1	-0.202535993624453	-0.098083468610584	1.35533520261898	-1.05471574038394	Cluster 1
TR2405_c0_g2	-0.466536072729865	-0.527667252390136	1.49952154408595	-0.505318218965951	Cluster 1
TR24062_c0_g1	-0.131447879270206	0.0622647849174657	1.25452011092968	-1.18533701657694	Cluster 1
TR2415_c0_g2	0.0231691319375983	-1.31278657741339	1.1162416530953	0.173375792380501	Cluster 1
TR2418_c0_g1	-1.31252249143333	-0.00141228087701895	1.11197860689662	0.201956165413737	Cluster 1
TR2418_c0_g2	-1.06891898703251	-0.280793500600703	1.33353116725961	0.0161813203735996	Cluster 1
TR24186_c0_g1	0.526238936552016	-0.945918586886334	1.14264342298055	-0.722963772646228	Cluster 1
TR24195_c0_g1	-0.968939060802128	0.266794062806071	1.28474113009738	-0.582596132101324	Cluster 1
TR24196_c2_g1	-1.14695293833489	0.644692501286278	1.00701968224174	-0.504759245193132	Cluster 1
TR24206_c0_g1	-0.678984805179141	-0.39905247321932	1.48734731933735	-0.409310040938888	Cluster 1
TR24212_c1_g1	-0.621810997009776	-0.88529722187002	1.34258395640838	0.164524262471419	Cluster 1
TR24217_c0_g1	-0.338001154608633	-0.583897526369224	1.49048086239313	-0.568582181415277	Cluster 1
TR2422_c1_g1	-0.616101390622376	-1.05904818302216	1.0564046013699	0.61874497227463	Cluster 1
TR24281_c0_g2	-0.402895546612519	-0.468293084613392	1.49363305541279	-0.622444424186877	Cluster 1
TR24342_c0_g1	0.0699805255000164	-0.538325644479455	1.37339041646673	-0.905045297487293	Cluster 1
TR24446_c2_g1	-0.579962448986978	-0.579962448986978	1.48951569950618	-0.329590801532229	Cluster 1
TR2449_c0_g1	-1.3199144377742	0.736461055266883	0.813857932538262	-0.230404550030949	Cluster 1
TR24529_c0_g1	-0.58971451230761	-0.691719184706764	1.46312951972537	-0.181695822710993	Cluster 1
TR24532_c0_g1	-0.713910895004823	0.0624911824875979	1.39207102049348	-0.740651307976259	Cluster 1
TR24541_c0_g1	0.0203952051220133	-1.19368865129155	1.25237289951679	-0.0790794533472445	Cluster 1
TR24594_c0_g1	-0.368122942371612	-0.813294872681469	1.45822343838677	-0.276805623333693	Cluster 1
TR24602_c0_g3	0.186556832043147	-0.814066176188279	1.33981724830988	-0.712307904164744	Cluster 1
TR24647_c1_g1	-0.844575346225267	-0.463366240536042	1.43391586019309	-0.125974273431784	Cluster 1
TR2465_c0_g2	-0.0383346277102592	-0.691780302554722	1.42652733366803	-0.696412403403045	Cluster 1
TR24721_c0_g1	-0.13851028923896	-0.518996384979717	1.44573591057051	-0.788229236351831	Cluster 1
TR24724_c0_g1	0.330313258487755	-0.437441882862162	1.21412440957661	-1.10699578520221	Cluster 1
TR24726_c0_g1	-1.07378216062057	-0.3351018690107	1.31363061633553	0.0952534132957332	Cluster 1
TR24753_c0_g2	0.0949847882233647	-1.31234084953506	1.12237127308833	0.0949847882233647	Cluster 1
TR2476_c0_g1	-1.05748657637585	-0.644569231335351	0.945250142522837	0.756805665188362	Cluster 1
TR24793_c3_g1	0.0304848874448091	-0.791732853851076	1.40103579384418	-0.639787827437911	Cluster 1
TR248_c1_g1	-0.247188634002202	-1.28325199948512	1.01122623000901	0.51921440347831	Cluster 1
TR248_c1_g2	-0.381635801412752	-1.23066825848831	0.947657439463127	0.66464662043794	Cluster 1
TR2480_c0_g1	-1.11457998441793	-0.555092079671388	1.00169201878302	0.667980045306306	Cluster 1
TR2483_c2_g1	-0.890995875145142	0.27513952624482	1.29301321401063	-0.677156865110308	Cluster 1
TR2485_c1_g1	-0.863345600741849	-0.863345600741849	0.959619934597718	0.76707126688598	Cluster 1
TR24866_c0_g1	-0.606506907870419	-0.637015303638549	1.47416568351603	-0.230643472007061	Cluster 1
TR2497_c0_g1	-0.792155698442497	-0.375135802021045	1.46412225643165	-0.296830755968108	Cluster 1
TR2499_c0_g1	-0.404539083504959	-0.59871784358734	1.49526392054428	-0.492006993451977	Cluster 1
TR2500_c0_g2	-1.29960181735943	-0.167517832843858	1.05508187565888	0.412037774544406	Cluster 1
TR25055_c0_g1	0.300990451574507	0.238307427074052	0.893792768993096	-1.43309064764165	Cluster 1
TR2510_c0_g1	-0.400869849086693	-0.834985682467657	1.44811835435623	-0.212262822801885	Cluster 1
TR25100_c0_g1	-1.06590287361262	-0.573544789486888	1.12875709711803	0.510690565981476	Cluster 1
TR2513_c3_g1	-0.809717556505545	-0.677610163947433	1.36781531235486	0.119512408098122	Cluster 1
TR25163_c1_g1	-0.433130940949274	-0.627432671468574	1.49369455336712	-0.433130940949274	Cluster 1
TR25203_c0_g1	-0.740960992394395	-0.740960992394395	1.37495911187096	0.106962872917826	Cluster 1
TR2523_c0_g1	-0.591781128536996	-0.51431838651796	1.4947353803854	-0.388635865330447	Cluster 1
TR25243_c0_g1	-0.850771271552891	-0.853991282792047	1.06892163030224	0.635840924042695	Cluster 1
TR25276_c0_g1	0.14365879423276	-1.45554007337715	0.667098604172799	0.644782674971594	Cluster 1
TR2532_c1_g1	0.0356997465441781	-0.549017872074974	1.38925721640148	-0.875939090870683	Cluster 1
TR2535_c1_g2	0.0620081966323622	-0.65697291875047	1.3900824839989	-0.795117761880796	Cluster 1
TR2537_c1_g1	-0.364614305534795	-0.614781413649684	1.4920681091138	-0.512672389929321	Cluster 1
TR25470_c0_g1	-0.786525844477723	-0.462662261457484	1.45738612359107	-0.208198017655868	Cluster 1
TR25532_c0_g1	-0.0136208941320799	-0.980704377509752	1.37571030734007	-0.381385035698237	Cluster 1
TR25566_c0_g2	-0.5	-0.5	1.5	-0.5	Cluster 1
TR25595_c0_g1	-0.535815155638854	-0.535815155638854	1.49800237129671	-0.426372060019003	Cluster 1
TR2561_c6_g1	-0.217655480687065	-0.40078094750399	1.44956222271482	-0.831125794523764	Cluster 1
TR2565_c4_g1	-1.4744941775276	0.35839536612491	0.751157411193303	0.364941400209383	Cluster 1
TR25672_c0_g1	-0.571122119277558	-1.02420438509274	1.21736050894026	0.377965995430033	Cluster 1
TR25684_c0_g1	-1.31596656088384	-0.231460988048076	0.866965616406643	0.680461932525269	Cluster 1
TR2572_c0_g2	-0.712269785959031	-1.00373568302667	0.938155856186448	0.777849612799249	Cluster 1
TR25729_c0_g1	-0.946874471668418	-0.706398415371677	1.17143667129846	0.481836215741632	Cluster 1
TR25744_c0_g1	-1.06921975935392	-0.595581915540944	1.07351178672323	0.591289888171637	Cluster 1
TR25744_c0_g2	-1.09282609262623	-0.588179991371674	0.993611993086603	0.687394090911301	Cluster 1
TR2576_c0_g1	-1.20051542071123	-0.432598533349454	0.954561759745639	0.678552194315041	Cluster 1
TR2576_c2_g3	0.172601179458373	-1.28821223638674	1.14450138310381	-0.0288903261754356	Cluster 1
TR25791_c0_g1	0.770031587663361	-0.90406905762963	0.956042770473694	-0.822005300507424	Cluster 1
TR25837_c0_g1	0.0974789136924712	-0.80712540537366	1.37640226133769	-0.666755769656502	Cluster 1
TR2584_c3_g1	-0.143820587857012	-1.35730679790055	0.822473986807285	0.678653398950273	Cluster 1
TR259_c0_g3	-0.84453308496849	-0.85002111564913	1.10072433537837	0.593829865239252	Cluster 1
TR25943_c0_g1	-0.646749160616136	-0.85818638620218	1.34946699859328	0.155468548225033	Cluster 1
TR2598_c0_g1	0.29146825186107	-0.389339196633149	1.22338680965098	-1.1255158648789	Cluster 1
TR25994_c0_g1	-0.145630128990785	-0.627566770842508	1.4557184363327	-0.682521536499408	Cluster 1
TR26019_c0_g1	-0.504593495055672	0.232744533774125	1.28793673271773	-1.01608777143618	Cluster 1
TR2604_c0_g1	-0.785998356065148	-0.0489171182324535	1.42524535743294	-0.590329883135335	Cluster 1
TR2604_c0_g2	-0.849463083605253	-0.00300163633782782	1.40476580610339	-0.552301086160306	Cluster 1
TR2608_c1_g1	-0.454411956221489	-0.544397583482771	1.49898738195554	-0.500177842251282	Cluster 1
TR2611_c0_g1	-0.60199506328586	-0.622072022144795	1.47847979847121	-0.254412713040559	Cluster 1
TR26143_c0_g1	-1.43315679993475	0.105350437877935	0.827347367955389	0.500458994101423	Cluster 1
TR26166_c1_g1	-0.447883183618024	-0.600354054636926	1.49612042187298	-0.447883183618024	Cluster 1
TR26172_c0_g1	-0.499249394192027	-0.654511940375071	1.48704042077036	-0.333279086203257	Cluster 1
TR26190_c0_g1	-0.681950384235196	-0.849462437247073	1.33172082144443	0.199692000037843	Cluster 1
TR26200_c0_g1	-0.756269416443428	-0.822162197282064	1.29239704235778	0.286034571367712	Cluster 1
TR26309_c0_g1	-0.533131621179162	-0.487758717249021	1.49957447489118	-0.478684136462993	Cluster 1
TR26316_c0_g1	-0.89786016039748	-0.719743555826154	1.2374599123039	0.380143803919736	Cluster 1
TR2632_c1_g2	0.688578580721592	-1.1540801444238	0.969504711434645	-0.504003147732439	Cluster 1
TR26334_c0_g1	-0.755420189598103	0.0472655881526804	1.39723712346082	-0.689082522015393	Cluster 1
TR26349_c0_g1	-0.459325988003305	-0.520029863069821	1.49938571414295	-0.520029863069821	Cluster 1
TR26377_c0_g2	0.238052723637638	-0.671505947192844	1.31182245579039	-0.878369232235181	Cluster 1
TR26400_c0_g2	-0.0586904957037103	-0.880357435555653	1.41308655040471	-0.474038619145352	Cluster 1
TR2642_c0_g1	-1.40555464324031	0.0167994578873346	0.867313188575519	0.521441996777458	Cluster 1
TR26439_c0_g1	-0.735938174267297	-0.534853163605236	1.46149245044303	-0.190701112570495	Cluster 1
TR26476_c0_g1	-0.478369297157084	-0.51534470176826	1.49981484954081	-0.506100850615466	Cluster 1
TR26479_c1_g1	-0.472014044244027	-0.534601541823346	1.49949212950451	-0.492876543437134	Cluster 1
TR26480_c0_g1	-0.495402419888733	-0.495402419888733	1.49996843799644	-0.509163598218975	Cluster 1
TR26484_c0_g1	-0.473357432364596	-1.10174459148616	1.18856123847006	0.386540785380697	Cluster 1
TR26588_c0_g1	-0.703137908486351	0.168460123908188	1.34768099126551	-0.813003206687343	Cluster 1
TR2661_c1_g1	0.17496044008227	-0.0216600848004835	1.13932046050542	-1.2926208157872	Cluster 1
TR26637_c0_g1	-0.603866009556548	-0.655297525661966	1.47017221222291	-0.211008677004398	Cluster 1
TR2664_c1_g1	-0.495463925815094	-1.11927923074106	1.12203947545312	0.492703681103032	Cluster 1
TR2667_c0_g1	-0.20118901690082	-0.489640739927297	1.45922636354571	-0.768396606717589	Cluster 1
TR26676_c0_g1	-0.878962034120782	0.741085636611639	0.982369332252639	-0.844492934743497	Cluster 1
TR26722_c0_g1	-0.831043141701404	-0.831043141701404	1.17562200533369	0.486464278069115	Cluster 1
TR2677_c4_g2	-0.171715868986683	-0.662609822135052	1.46201025176797	-0.627684560646236	Cluster 1
TR26933_c0_g1	0.494473966902655	-0.680171613861731	1.1595306560119	-0.973833009052828	Cluster 1
TR2700_c1_g1	0.255838754679372	-0.156998168559914	1.15577956089411	-1.25462014701357	Cluster 1
TR27011_c0_g1	-0.0139725157250297	-0.434418216178191	1.38835997158702	-0.939969239683804	Cluster 1
TR27041_c0_g1	-0.566359670805297	-0.56974597675929	1.49251434922233	-0.356408701657743	Cluster 1
TR2714_c5_g1	-0.161097066763238	-1.15629539367561	1.27888460895378	0.0385078514850722	Cluster 1
TR2714_c5_g2	0.133372027701098	-1.29048106474758	1.14750964063198	0.00959939641450371	Cluster 1
TR27142_c0_g1	-0.899541268188275	-0.819857007292367	1.00199246076873	0.717405814711914	Cluster 1
TR2716_c4_g1	-0.667642551061601	-1.00633712988482	1.10197570699857	0.57200397394785	Cluster 1
TR27217_c0_g2	-0.362553322789819	-1.11829827733761	1.25106428286628	0.229787317261153	Cluster 1
TR2723_c0_g1	-0.398949230938322	-0.518451910494886	1.49582030837626	-0.578419166943048	Cluster 1
TR273_c2_g1	0.408143707149309	-0.669695880100351	1.2149166153977	-0.95336444244666	Cluster 1
TR27369_c2_g1	0.450304391409022	-0.464159911144685	1.14308037819213	-1.12922485845647	Cluster 1
TR27496_c0_g2	-1.49370914237413	0.587615308261296	0.533787951779345	0.372305882333493	Cluster 1
TR2755_c1_g1	-0.367521572898929	-0.782980742262937	1.46689045183138	-0.316388136669513	Cluster 1
TR2759_c0_g1	-1.47278953281276	0.266203126002511	0.729984776120199	0.476601630690047	Cluster 1
TR27604_c0_g2	-0.182165777547895	-0.702023684950433	1.46265410543139	-0.578464642933064	Cluster 1
TR27615_c0_g1	0.67749010589581	-0.621255749279952	1.00954059257992	-1.06577494919578	Cluster 1
TR27624_c1_g1	-0.821925966845139	-0.795566189338065	1.24656550762317	0.370926648560032	Cluster 1
TR2770_c0_g3	-0.556828204448961	0.429716359389403	1.18096531273241	-1.05385346767285	Cluster 1
TR27792_c0_g1	-0.842941210647286	-0.873831233870443	1.0199648052723	0.696807639245431	Cluster 1
TR27813_c0_g1	-0.672666219463842	-0.634410320726562	1.45691214357809	-0.14983560338768	Cluster 1
TR2793_c0_g1	-0.562184515972575	-0.0964606140006562	1.43786602744728	-0.779220897474052	Cluster 1
TR27977_c0_g1	-0.532527443123027	-0.535513179688395	1.49819995512185	-0.430159332310431	Cluster 1
TR28_c1_g1	-0.0197963069192173	-0.833758744662615	1.41170806874574	-0.558153017163903	Cluster 1
TR28_c5_g1	0.409896429274772	0.191736991031915	0.842476877977644	-1.44411029828433	Cluster 1
TR2805_c1_g1	-0.726017311070991	-0.681971771471133	1.41694500892743	-0.00895592638530444	Cluster 1
TR28096_c0_g1	-0.827600094603251	-0.622176756291738	1.38709976204914	0.0626770888458449	Cluster 1
TR28109_c0_g1	-0.081044765687046	-0.618499527611667	1.43747821244918	-0.737933919150471	Cluster 1
TR283_c1_g1	-0.176157231632417	0.584233696277297	0.923874977410303	-1.33195144205518	Cluster 1
TR283_c1_g2	-0.864708609370766	0.51818935046851	1.1540045044176	-0.807485245515348	Cluster 1
TR2830_c0_g1	-0.123376351831716	0.23105025888485	1.15562516215707	-1.26329906921021	Cluster 1
TR2830_c1_g1	-0.364886007504554	-0.00337232908969088	1.36714221296069	-0.998883876366442	Cluster 1
TR28367_c0_g1	0.169932659619456	-0.509102886682809	1.32163088530092	-0.982460658237567	Cluster 1
TR2838_c1_g1	-0.355047514512966	-1.01279896003629	1.35945174889318	0.00839472565607875	Cluster 1
TR28485_c2_g1	-0.568065949092168	-0.568065949092168	1.49251289454876	-0.356380996364426	Cluster 1
TR2855_c2_g2	-0.683965849497113	-0.993803153912566	1.1006970239359	0.577071979473782	Cluster 1
TR28619_c0_g1	-1.00134072576694	-0.683907690706364	1.07667111475362	0.60857730171969	Cluster 1
TR28636_c0_g1	-0.5	-0.5	1.5	-0.5	Cluster 1
TR2868_c0_g1	0.594925998834236	-0.177307748517919	0.9153400012321	-1.33295825154842	Cluster 1
TR28763_c1_g1	0.16516802520273	0.078237485622346	1.09010896633802	-1.3335144771631	Cluster 1
TR288_c4_g1	-0.0975201886793336	-0.606288667040898	1.44168202267536	-0.737873166955131	Cluster 1
TR288_c6_g1	-0.612106422310349	-0.622582739863684	1.47626477417694	-0.241575612002902	Cluster 1
TR28844_c0_g1	-0.876896737375149	-0.83183138042225	1.053402718774	0.655325399023398	Cluster 1
TR28878_c0_g1	-0.628113794168787	-0.849258993093739	1.36833591834814	0.109036868914386	Cluster 1
TR28881_c0_g1	0.333430566746914	0.382009854617325	0.757395260888686	-1.47283568225293	Cluster 1
TR290_c0_g1	-0.0582524528902979	0.568591613772061	0.872457840056597	-1.38279700093836	Cluster 1
TR290_c0_g2	0.356169147821288	0.0186321865408846	0.996355718154413	-1.37115705251658	Cluster 1
TR290_c11_g1	-0.854836316275404	-0.871721971905535	0.960371663963725	0.766186624217214	Cluster 1
TR29032_c1_g1	0.0965845519766586	-0.575490775885796	1.36746157946276	-0.888555355553628	Cluster 1
TR29048_c0_g1	-0.72642403520465	0.23451484601095	1.31747771214282	-0.825568522949116	Cluster 1
TR29049_c0_g1	-0.482484742474231	-0.981492935033196	1.33707758085667	0.126900096650756	Cluster 1
TR29142_c0_g1	-0.331617095686054	-0.901375327200348	1.42810494227216	-0.195112519385754	Cluster 1
TR2920_c0_g1	-0.952177961604221	-0.661664267982516	1.22722704796089	0.386615181625844	Cluster 1
TR29314_c0_g1	-0.241939326200084	-0.668585019714212	1.47504944038116	-0.564525094466864	Cluster 1
TR294_c3_g1	-0.373051058291485	-0.364632416637516	1.47694544516812	-0.73926197023912	Cluster 1
TR29418_c0_g1	-0.630742783686017	-0.771720397817449	1.4164796878076	-0.0140165063041335	Cluster 1
TR2945_c0_g1	-0.82056129401539	-0.305496032699157	1.45727381577497	-0.331216489060426	Cluster 1
TR29476_c0_g1	-0.432485158202823	-0.550363249204697	1.4981668187468	-0.515318411339275	Cluster 1
TR2950_c1_g1	-0.504489062276077	-0.521454535838651	1.49970778700977	-0.473764188895037	Cluster 1
TR29508_c0_g1	-0.557862998358611	-0.894736789637965	1.37175007808953	0.0808497099070451	Cluster 1
TR29532_c0_g1	0.336558043353337	-0.819057185151926	1.26581564978025	-0.78331650798166	Cluster 1
TR2954_c0_g1	-0.666295754922533	-0.527922821620337	1.48149281850721	-0.287274241964343	Cluster 1
TR2954_c0_g2	-0.550252896313253	-0.596543575622531	1.49094562941964	-0.344149157483853	Cluster 1
TR29738_c0_g1	-0.269272414335042	0.615204643337715	0.942646062772315	-1.28857829177499	Cluster 1
TR29752_c0_g1	-0.89591161014097	-0.833094023885526	0.929949333089955	0.799056300936541	Cluster 1
TR29804_c0_g1	-0.233543299265999	-0.724811492817364	1.46935007630842	-0.51099528422506	Cluster 1
TR2984_c0_g1	-0.572332867539919	-0.454391227862879	1.49796412893383	-0.471240033531028	Cluster 1
TR2987_c0_g1	-0.469485345045113	-0.502689599438909	1.49957763402518	-0.527402689541162	Cluster 1
TR2987_c0_g2	-0.850595501712567	-0.505247547293248	1.42023447119447	-0.0643914221886518	Cluster 1
TR29885_c0_g1	-0.540563868881509	-0.540563868881509	1.49742405057981	-0.416296312816794	Cluster 1
TR2991_c0_g1	-1.07294621902608	-0.62719957760372	0.921344337308241	0.77880145932156	Cluster 1
TR2991_c0_g2	-1.05878882891315	-0.604668537332108	1.0864804947664	0.576976871478852	Cluster 1
TR2997_c1_g1	-0.213445956498027	-0.588422299372267	1.47021044193679	-0.668342186066492	Cluster 1
TR29999_c0_g1	-0.499836297972583	0.321211414057616	1.23627222288517	-1.0576473389702	Cluster 1
TR300_c3_g1	-1.26039139174801	-0.315343340469025	0.97562005460035	0.600114677616681	Cluster 1
TR30036_c0_g1	-0.382554202915245	-0.620983334034513	1.49285105230647	-0.489313515356708	Cluster 1
TR30143_c0_g3	-0.0237200476425542	-0.814388302394361	1.41529617600573	-0.577187825968819	Cluster 1
TR30159_c0_g1	-1.05470439209675	-0.519292993052288	1.22242925445012	0.351568130698917	Cluster 1
TR3018_c0_g2	-1.00605227693612	-0.588530721512054	1.22749083467114	0.367092163777026	Cluster 1
TR3018_c10_g1	0.36223218895062	-1.42021794986101	0.911158996847042	0.146826764063351	Cluster 1
TR30396_c0_g1	-0.732761443136688	-0.752424980263544	1.3726836656833	0.112502757716937	Cluster 1
TR3047_c0_g1	-1.44549926341694	0.661843226708035	0.679436285609259	0.104219751099647	Cluster 1
TR305_c0_g1	-0.485986176975599	-1.12723950314468	1.11637080270114	0.496854877419143	Cluster 1
TR3058_c0_g1	0.635031414817909	-0.406579969925712	0.982435756523803	-1.210887201416	Cluster 1
TR30591_c0_g1	-0.623953525143243	-0.467893469934328	1.49347106070492	-0.401624065627353	Cluster 1
TR3064_c0_g1	-0.96771535068749	-0.718282009918338	1.09429969928866	0.591697661317166	Cluster 1
TR30668_c0_g1	0.315152419515816	-0.975002797877057	1.26060967806327	-0.600759299702025	Cluster 1
TR30744_c0_g1	-0.47933732588217	-0.597739693669225	1.49585129398092	-0.418774274429521	Cluster 1
TR3088_c0_g1	-0.350600256911626	-0.753561932083087	1.47393704977614	-0.369774860781425	Cluster 1
TR3097_c0_g1	-0.36898895632476	-0.106662520288497	1.40815648071962	-0.932505004106363	Cluster 1
TR3101_c0_g1	-0.268880137272417	-0.433357791742746	1.46766171819919	-0.765423789184024	Cluster 1
TR3102_c0_g1	-1.05211625787374	-0.561026069607119	1.17885267334288	0.434289654137977	Cluster 1
TR3104_c0_g1	-0.0691665500886388	-1.20641843299515	1.24037527769826	0.0352097053855344	Cluster 1
TR3105_c0_g2	0.632041942174081	-0.783217368546507	1.06948572912408	-0.918310302751654	Cluster 1
TR31111_c0_g1	-0.458032800414071	-0.827071705560524	1.44268085264111	-0.157576346666516	Cluster 1
TR31118_c1_g1	0.374941682950993	-0.816913855696528	1.24431418283455	-0.802342010089019	Cluster 1
TR3112_c0_g1	-0.3750035321196	0.292839015530432	1.21799392829956	-1.1358294117104	Cluster 1
TR31124_c0_g1	-0.584997674997895	-0.806137778514825	1.41677874902662	-0.0256432955138967	Cluster 1
TR3114_c0_g1	-0.357084235771444	-1.04326995629987	1.33404723858054	0.0663069534907791	Cluster 1
TR3114_c1_g1	-0.327519696248197	-0.92170843479684	1.41925201707552	-0.170023886030485	Cluster 1
TR31350_c0_g1	-0.787804830835319	-0.564119274882078	1.43335349670038	-0.0814293909829781	Cluster 1
TR31395_c0_g3	-0.721809035235508	-0.631110517719005	1.4398389655745	-0.0869194126199826	Cluster 1
TR3151_c0_g4	0.725587313785407	-0.613820937663194	0.966491754204256	-1.07825813032647	Cluster 1
TR3160_c0_g1	0.0736997293229355	0.322587339823342	0.987601808554371	-1.38388887770065	Cluster 1
TR3179_c0_g1	0.714158098063027	-0.829988888393759	1.00511871814295	-0.889287927812223	Cluster 1
TR31890_c0_g1	-0.686424245522613	0.220333708439357	1.32200225063614	-0.855911713552888	Cluster 1
TR3192_c0_g1	-0.543345410680246	-0.545445341412467	1.49690062361795	-0.408109871525237	Cluster 1
TR3197_c3_g1	-0.785716591553816	-0.804398711597555	1.2805258852837	0.309589417867672	Cluster 1
TR320_c0_g1	-0.146007837817294	-0.308410441668158	1.40625891061771	-0.951840631132259	Cluster 1
TR320_c1_g2	0.546864700462425	-0.491701823753698	1.08094164314237	-1.1361045198511	Cluster 1
TR32028_c0_g1	-0.576252311294024	-0.085150685174031	1.43568015700401	-0.774277160535957	Cluster 1
TR32037_c1_g1	-1.42021059601159	0.125903109788951	0.901647687514604	0.392659798708037	Cluster 1
TR32124_c0_g2	-0.447107333154709	-0.528193540575614	1.49896164494701	-0.523660771216682	Cluster 1
TR32347_c0_g1	-0.468775521978874	-0.497000841917392	1.49947012173373	-0.533693757837464	Cluster 1
TR32495_c0_g1	-0.499519129462396	-0.62992555396219	1.49096523353617	-0.361520550111587	Cluster 1
TR325_c0_g1	-1.482176982703	0.442580404212659	0.702682753795856	0.336913824694485	Cluster 1
TR32571_c1_g1	0.0547610612999667	-0.478246602019709	1.36902653249917	-0.945540991779424	Cluster 1
TR3259_c12_g1	-1.27648615038681	-0.204103398265428	1.08150746818292	0.399082080469317	Cluster 1
TR326_c0_g1	-0.489010385681657	-0.896435620016221	1.39896011052224	-0.0135141048243651	Cluster 1
TR3261_c1_g3	0.576609920669011	0.0403565798135255	0.804074279617974	-1.42104078010051	Cluster 1
TR32611_c0_g1	-0.0273286631426355	-0.592121034757103	1.41805396529009	-0.798604267390349	Cluster 1
TR3264_c3_g1	-0.99155289563539	0.0370154969865852	1.36041135072062	-0.405873952071818	Cluster 1
TR32736_c0_g1	-0.430636633788648	0.108640852901087	1.3337955314001	-1.01179975051254	Cluster 1
TR3275_c0_g1	-0.560465587363141	-0.600822163664467	1.489103129605	-0.32781537857739	Cluster 1
TR32847_c0_g1	-0.351455768137529	0.227094496335019	1.2490197298426	-1.12465845804009	Cluster 1
TR3287_c0_g1	-0.751035938139338	-0.460375276365932	1.46890925043876	-0.257498035933487	Cluster 1
TR3290_c0_g1	0.151485541947262	-0.593445372578104	1.34508188453373	-0.903122053902887	Cluster 1
TR32969_c0_g1	-0.569701164095355	-0.51078687618477	1.49701205580796	-0.416524015527834	Cluster 1
TR32971_c0_g2	0.0147066329464428	-0.4467944413325	1.37940294272409	-0.947315134338031	Cluster 1
TR3303_c0_g1	-0.811769353928331	-0.491634960829835	1.44223810768353	-0.138833792925369	Cluster 1
TR3308_c0_g1	0.377782929032628	-0.512056509674137	1.20425232803069	-1.06997874738918	Cluster 1
TR33106_c0_g1	-0.93911774248112	-0.661199971535488	1.24757592781638	0.352741786200226	Cluster 1
TR33183_c0_g1	-0.365132441537724	-0.605505855644848	1.49253600879016	-0.521897711607588	Cluster 1
TR3324_c0_g1	-0.382935452328737	-0.669964548128295	1.48827346067223	-0.435373460215195	Cluster 1
TR33247_c0_g1	-0.623935172853968	-0.71462830699694	1.44521188759311	-0.106648407742199	Cluster 1
TR33263_c0_g1	-0.548745396642445	-0.548745396642445	1.49624578151173	-0.398754988226844	Cluster 1
TR33298_c0_g1	-0.684677295587623	-0.684677295587623	1.43463329550604	-0.0652787043307987	Cluster 1
TR3337_c2_g1	-0.964367468873633	-0.558045003279185	1.30879700097761	0.213615471175206	Cluster 1
TR33416_c0_g1	0.142129872358809	-0.61232533165619	1.35185976845182	-0.881664309154445	Cluster 1
TR3347_c1_g1	-0.0294038801585877	-0.558673723013167	1.41522153632855	-0.827143933156794	Cluster 1
TR335_c0_g2	-1.11178844051235	0.11347119135126	1.29059152991433	-0.292274280753246	Cluster 1
TR33517_c0_g1	-0.084540653823461	-0.633505282028771	1.43923798182284	-0.721192045970607	Cluster 1
TR33576_c0_g1	0.230908745331015	-1.25664800801802	1.1615014289626	-0.135762166275599	Cluster 1
TR3359_c4_g1	-0.949231387346719	0.715284031260664	1.00013924722852	-0.766191891142471	Cluster 1
TR33592_c0_g2	0.386524470430789	-0.573516392200391	1.21246754055787	-1.02547561878827	Cluster 1
TR336_c0_g1	0.699356040223696	-0.492195440200677	0.956416638792406	-1.16357723881543	Cluster 1
TR33692_c0_g1	-0.695378480615366	-0.618752752723866	1.45397318674122	-0.139841953401988	Cluster 1
TR337_c1_g1	0.334621165371839	-0.383878451736683	1.19498176721111	-1.14572448084627	Cluster 1
TR3370_c0_g2	-0.565634196104437	-0.556121743783992	1.49404954257983	-0.3722936026914	Cluster 1
TR33717_c0_g2	-0.645037195405062	0.547169482998777	1.11658162790807	-1.01871391550179	Cluster 1
TR33760_c0_g1	-0.593291846947939	-0.745240864792579	1.44282499217025	-0.104292280429731	Cluster 1
TR338_c0_g1	-1.1794487914761	-0.347045585533564	1.1653462859461	0.36114809106357	Cluster 1
TR3385_c0_g1	-0.994999578953961	-0.431389745151069	1.34824799591493	0.0781413281901017	Cluster 1
TR339_c0_g1	-1.09693947839375	0.750960030762794	0.93880038052067	-0.592820932889709	Cluster 1
TR3395_c0_g1	-0.371041604901446	-1.16334097175867	1.17450011777074	0.359882458889373	Cluster 1
TR3407_c0_g2	-0.614996490012191	-1.07870913480824	0.956046557605968	0.737659067214466	Cluster 1
TR3409_c0_g1	-0.501473889210727	-0.754700420500116	1.46174303876318	-0.20556872905234	Cluster 1
TR34124_c0_g1	0.199454749935622	-1.46673867129529	0.68791536202286	0.579368559336807	Cluster 1
TR34141_c0_g2	-0.508582895065512	-0.508582895065512	1.49988853798981	-0.482722747858791	Cluster 1
TR3418_c0_g1	0.687649860013322	-0.488532392130676	0.965488187291432	-1.16460565517408	Cluster 1
TR34268_c0_g1	-0.500650380340779	-0.347585295905382	1.48919571731939	-0.640960041073227	Cluster 1
TR3427_c0_g3	-0.469570249850264	-0.344105507257659	1.48620367879916	-0.672527921691242	Cluster 1
TR34398_c0_g1	-0.537612373760836	-0.537612373760836	1.49779249809089	-0.422567750569217	Cluster 1
TR344_c12_g1	-0.119905394543466	-1.34392651749462	0.964383457601125	0.499448454436958	Cluster 1
TR34401_c0_g1	-0.726703878389501	-0.301787324912583	1.47651604337231	-0.448024840070224	Cluster 1
TR3448_c1_g1	0.526897633648181	-1.34313925699453	0.949060099456284	-0.132818476109939	Cluster 1
TR3453_c0_g2	-0.4393868576493	-0.470567098090742	1.49696970690801	-0.587015751167964	Cluster 1
TR3457_c0_g1	-0.524635742102055	-0.524635742102055	1.49906617893069	-0.449794694726584	Cluster 1
TR3458_c0_g2	0.191034223292176	-0.89657166146328	1.33020762844552	-0.624670190274416	Cluster 1
TR34583_c0_g1	-0.829751053766661	-0.647769099415748	1.37136401314438	0.106156140038032	Cluster 1
TR3463_c0_g1	0.206305267143042	-0.851919397261269	1.32860592040119	-0.682991790282966	Cluster 1
TR3476_c0_g2	-0.106980419963867	0.362920918358435	1.06032492192035	-1.31626542031492	Cluster 1
TR3476_c0_g3	-1.17210566092548	-0.389181054406164	1.13834317789376	0.422943537437883	Cluster 1
TR3479_c4_g1	-0.126705334876623	0.10279866791877	1.23119334832945	-1.2072866813716	Cluster 1
TR34883_c0_g1	-0.5	-0.5	1.5	-0.5	Cluster 1
TR3489_c2_g2	-0.990602538754	-0.705342766145819	1.05178991601463	0.644155388885189	Cluster 1
TR34950_c0_g2	-0.222885649783661	-1.07728064062103	1.33731389870197	-0.0371476082972769	Cluster 1
TR34996_c0_g1	-0.518648747300693	-0.454180288966237	1.49921399856776	-0.526384962300827	Cluster 1
TR3511_c0_g1	-0.807314521701489	-0.846257337219557	1.19075147449477	0.462820384426271	Cluster 1
TR3525_c1_g1	-0.917441184568131	-0.66431336335267	1.27358614232477	0.308168405596033	Cluster 1
TR3525_c2_g1	-0.384838710485019	-0.62086683778351	1.49297946091325	-0.487273912644726	Cluster 1
TR3531_c0_g1	-0.774581256018921	-0.147016838961098	1.44916598404511	-0.527567889065093	Cluster 1
TR35377_c0_g1	-0.618644927903514	-0.999878843430263	1.20150616698502	0.417017604348754	Cluster 1
TR3547_c0_g1	-0.811207707204561	-0.486201626031193	1.44366206976377	-0.146252736528015	Cluster 1
TR3554_c1_g1	-0.792222605438717	-0.620486347452732	1.40974154743396	0.00296740545748442	Cluster 1
TR3554_c2_g1	-0.658258530349563	-0.696824942247541	1.44010488064492	-0.085021408047813	Cluster 1
TR3555_c1_g1	-0.929243248700405	-0.611336290120624	1.3069844067087	0.233595132112329	Cluster 1
TR3562_c0_g2	-0.624767029655841	-0.661294966977476	1.4632070147037	-0.177145018070385	Cluster 1
TR3566_c0_g1	-0.236886834204156	-0.623970001584565	1.4754185659439	-0.61456173015518	Cluster 1
TR3568_c0_g1	-0.501251289933952	-0.502358122239447	1.49999495229683	-0.496385540123432	Cluster 1
TR35789_c0_g1	-0.5	-0.5	1.5	-0.5	Cluster 1
TR3585_c1_g1	0.0410576336785757	-0.983307260515558	1.36205239815725	-0.419802771320271	Cluster 1
TR3589_c1_g2	-0.529878201193596	-0.83167839404734	1.4226077792915	-0.0610511840505665	Cluster 1
TR35905_c0_g2	0.0041986982274685	-0.888024675109626	1.39606716063334	-0.512241183751179	Cluster 1
TR35935_c0_g1	-0.681891668993962	-0.326679647722072	1.48400401305738	-0.475432696341347	Cluster 1
TR3595_c0_g1	-1.49015020942224	0.461150763971052	0.651197193218536	0.377802252232654	Cluster 1
TR3595_c1_g1	-0.499576479036907	-0.504619522358416	1.4999901979411	-0.495794196545776	Cluster 1
TR360_c6_g1	-1.0831593349374	-0.284648873222744	1.32041460161953	0.047393606540618	Cluster 1
TR36169_c0_g1	-0.39551659749122	-0.161266809809086	1.43220186044383	-0.875418453143524	Cluster 1
TR362_c0_g1	-0.652101017619728	-0.146863625218881	1.45636999003735	-0.657405347198739	Cluster 1
TR3623_c0_g1	-0.521772301282688	-0.550933228300483	1.49783018703545	-0.425124657452282	Cluster 1
TR3624_c0_g1	-1.02440766648766	0.277662858267703	1.26631091422089	-0.519566106000929	Cluster 1
TR3636_c0_g1	-0.287228218164048	-0.346146827018212	1.45622698020234	-0.822851935020083	Cluster 1
TR36391_c0_g1	-0.646355127503454	-0.714792729239113	1.43718963644886	-0.0760417797062886	Cluster 1
TR36449_c0_g1	-1.15666827970268	0.366126494835022	1.17488352820194	-0.384341743334277	Cluster 1
TR3646_c0_g1	0.486918996501393	-0.280807320380135	1.05081073311436	-1.25692240923562	Cluster 1
TR3653_c1_g1	-0.516093204026742	-0.516093204026742	1.49960507966161	-0.467418671608131	Cluster 1
TR36541_c0_g1	-0.544734901517387	-0.549653501079621	1.49648391680962	-0.402095514212609	Cluster 1
TR3668_c1_g1	-1.2783392763685	-0.0529428811684583	1.15394920605038	0.177332951486584	Cluster 1
TR3670_c0_g1	0.266458534255326	-1.41259524324399	0.945062877600038	0.201073831388623	Cluster 1
TR3681_c2_g1	-0.748423192857611	-0.356045984951679	1.47504765194267	-0.37057847413338	Cluster 1
TR3689_c0_g1	-0.266144462080503	-0.502177689400072	1.47545050328571	-0.707128351805131	Cluster 1
TR369_c0_g1	-0.956612137596683	-0.709658830736193	1.14381867666834	0.522452291664531	Cluster 1
TR3690_c1_g1	-0.00153131934618668	0.0717056928627534	1.18810407533504	-1.25827844885161	Cluster 1
TR36908_c0_g1	-0.501649659085503	-0.486562451293457	1.49991990799249	-0.511707797613533	Cluster 1
TR3695_c2_g1	-0.227310845446664	-1.11437406919477	1.30583891729527	0.0358459973461689	Cluster 1
TR3695_c3_g1	-1.38900875170165	0.0235788522665403	0.945297622685843	0.420132276749263	Cluster 1
TR3696_c0_g1	-0.537511439653589	-0.956750335247611	1.32992635855503	0.16433541634617	Cluster 1
TR36961_c1_g1	-0.758004952409408	-0.105719327157291	1.44212005250458	-0.578395772937882	Cluster 1
TR36976_c0_g1	-0.5	-0.5	1.5	-0.5	Cluster 1
TR370_c5_g1	-0.624056786888713	-0.434153620508164	1.49402984515399	-0.435819437757116	Cluster 1
TR37127_c0_g1	-0.683585927024663	-0.683585927024663	1.43553044675179	-0.0683585927024663	Cluster 1
TR37145_c0_g1	0.385471816394816	-0.378971448496084	1.16031566992369	-1.16681603782242	Cluster 1
TR3719_c0_g1	0.568034484337284	-0.404035026917071	1.03617839006408	-1.20017784748429	Cluster 1
TR372_c2_g1	0.0536287464911262	-0.284904963753326	1.31755507224443	-1.08627885498223	Cluster 1
TR3726_c0_g1	0.00352910217994355	-0.706141263459618	1.41303112435135	-0.710418963071671	Cluster 1
TR37273_c0_g1	0.236882804709012	-0.29736352080493	1.22473450094234	-1.16425378484642	Cluster 1
TR3731_c1_g1	-0.914713466686429	-0.768305086690675	1.12144752177302	0.56157103160408	Cluster 1
TR3734_c1_g1	-1.00423285821636	0.234461702854488	1.29049870163608	-0.520727546274208	Cluster 1
TR3738_c0_g1	-0.0126105000153975	-0.138975510478973	1.29420131601326	-1.14261530551889	Cluster 1
TR37464_c0_g1	-0.326375625750942	-1.26606432527058	0.902586268075892	0.689853682945634	Cluster 1
TR37479_c0_g1	0.734134376556369	-0.598078584762139	0.955225038221994	-1.09128083001622	Cluster 1
TR37561_c0_g1	-0.215709625830831	-0.729043925276355	1.4662793553311	-0.521525804223909	Cluster 1
TR37684_c0_g1	-0.326208157864156	-0.502348974899152	1.48618814373279	-0.657631010969479	Cluster 1
TR3769_c0_g1	-0.254008309595108	-0.419563073763241	1.46208507441057	-0.788513691052225	Cluster 1
TR37743_c0_g1	-0.928878610542183	0.650487959390461	1.05442733557139	-0.776036684419669	Cluster 1
TR3777_c0_g2	-0.429430700636834	-0.437649470027012	1.49376133666497	-0.626681166001121	Cluster 1
TR378_c0_g1	0.317799505674568	-0.604313049650603	1.25967161575671	-0.973158071780672	Cluster 1
TR3780_c0_g1	-0.0382837234704223	0.543003832896808	0.882609107763684	-1.38732921719007	Cluster 1
TR3782_c0_g1	-1.17882345681052	0.720421167593826	0.931448348083198	-0.473046058866509	Cluster 1
TR37962_c0_g1	-0.441544111784739	-0.0771317461702231	1.41358598902963	-0.894910131074668	Cluster 1
TR3804_c0_g1	0.0425216974268339	-0.210551961227324	1.29639764004172	-1.12836737624123	Cluster 1
TR38073_c0_g1	-0.586966376679587	-0.358888013169805	1.49257164355666	-0.546717253707273	Cluster 1
TR3815_c0_g1	-0.825149463937046	-0.864988259108182	1.11212776171052	0.578009961334708	Cluster 1
TR3829_c0_g1	-0.630869073380562	-0.697196551807476	1.4495396642499	-0.121474039061863	Cluster 1
TR3832_c0_g2	-1.35659967266631	0.678930421864298	0.823124313319068	-0.145455062517057	Cluster 1
TR38391_c0_g2	0.694101478926364	-1.27688479613812	0.890545293716845	-0.307761976505086	Cluster 1
TR3843_c7_g1	-0.736026660531688	0.51162572606185	1.15415199723111	-0.929751062761267	Cluster 1
TR3843_c8_g1	-0.464028058227744	-0.708094764178701	1.47946608175209	-0.307343259345649	Cluster 1
TR38440_c0_g1	0.626605870413121	-0.433253201828501	0.998988787687205	-1.19234145627182	Cluster 1
TR38487_c0_g1	-0.499244154653491	-0.863837396226165	1.41487036360305	-0.0517888127233913	Cluster 1
TR3851_c0_g1	-0.842576133593712	-0.790041410635831	1.22446315817216	0.408154386057386	Cluster 1
TR3860_c0_g1	-1.10534758646392	-0.0304887833573497	1.32031934708524	-0.184482977263965	Cluster 1
TR38640_c0_g1	-0.841619624235477	0.62287041134694	1.07885468610051	-0.860105473211974	Cluster 1
TR387_c0_g1	0.427127581910922	-1.21688190993884	1.11073486520712	-0.320980537179194	Cluster 1
TR3873_c1_g1	-0.606914608982732	-0.641694815801226	1.47294175876325	-0.224332333979291	Cluster 1
TR3873_c1_g2	-0.59565557525944	-0.59565557525944	1.48469374728845	-0.293382596769575	Cluster 1
TR38748_c0_g1	-0.238035367886266	-0.570326351244275	1.47454123865117	-0.666179519520624	Cluster 1
TR3883_c1_g2	-0.484878194463383	-0.961334187037825	1.35356816072284	0.0926442207783636	Cluster 1
TR3888_c2_g1	-0.532736606231554	0.72487111995441	0.946116923635274	-1.13825143735813	Cluster 1
TR3889_c0_g1	0.322089045565168	-1.37014054806249	1.00867384488904	0.0393776576082807	Cluster 1
TR38925_c0_g1	-0.442646132809837	-0.498158444033528	1.49834828404642	-0.557543707203058	Cluster 1
TR39018_c0_g1	-0.612740756755158	-0.558188320541663	1.48752803746443	-0.31659896016761	Cluster 1
TR39050_c0_g1	0.52265261388424	-0.492737486953464	1.09940246739114	-1.12931759432191	Cluster 1
TR3910_c0_g1	-0.987778765557037	-0.691445135889926	1.10066776733498	0.578556134111979	Cluster 1
TR3925_c1_g1	-0.151982956800205	-0.184909529202672	1.36968755374831	-1.03279506774543	Cluster 1
TR3925_c1_g2	-0.471055609235656	-0.199821920468533	1.45640698098868	-0.785529451284495	Cluster 1
TR3929_c0_g2	-0.384184282570469	0.214139495484745	1.26656568489783	-1.0965208978121	Cluster 1
TR393_c4_g1	-1.05635411217791	-0.570795934400171	1.15599242494785	0.471157621630232	Cluster 1
TR3941_c4_g1	-0.510133101674697	-0.525591680513325	1.49948214734684	-0.463757365158816	Cluster 1
TR3946_c0_g1	-0.602039754322664	-0.275095153081028	1.48192452778372	-0.604789620380031	Cluster 1
TR395_c0_g1	-1.42830662809297	0.587157130356707	0.782113433966962	0.0590360637693025	Cluster 1
TR39594_c0_g1	0.426576620684101	-1.04901452418411	1.18411254288233	-0.561674639382319	Cluster 1
TR398_c2_g1	-0.585570264283045	-0.526272009672104	1.49455008825339	-0.382707814298246	Cluster 1
TR3988_c0_g1	-0.510982599359304	-0.509356913576816	1.49984292396179	-0.479503411025672	Cluster 1
TR3992_c0_g1	-0.0257333074110217	-0.863952907479357	1.40846969229657	-0.518783477406191	Cluster 1
TR4_c2_g1	-0.558556423436888	-1.07755502651706	1.12502441094512	0.511087039008824	Cluster 1
TR40021_c0_g1	-0.433427590906987	-0.564320253688014	1.49785660333383	-0.500108758738831	Cluster 1
TR40075_c0_g1	-0.0938997821060093	-0.78542341107363	1.43657890941624	-0.557255716236598	Cluster 1
TR40106_c1_g1	0.680760004494984	-0.753698576405161	1.02789357821564	-0.954955006305464	Cluster 1
TR4013_c0_g1	-0.87292741415321	-0.824296360439939	1.09176715586293	0.605456618730221	Cluster 1
TR4017_c0_g1	0.502140630929311	-0.14686564414367	0.976306853450304	-1.33158184023594	Cluster 1
TR4024_c5_g1	-0.648922392909592	0.408858617497951	1.21157186653062	-0.971508091118984	Cluster 1
TR4026_c0_g1	-1.3662925093369	0.284684391773979	1.02415771606625	0.0574504014966654	Cluster 1
TR4031_c0_g1	-0.572206771109332	-0.54895308520068	1.4940493196309	-0.372889463320886	Cluster 1
TR4033_c2_g1	-0.123915621096655	-0.951723069247506	1.4039512122188	-0.328312521874643	Cluster 1
TR40443_c0_g1	0.0389112179615898	-0.945989118639962	1.37337462739841	-0.466296726720035	Cluster 1
TR40460_c0_g1	-0.187444034138936	-0.62197338600647	1.46547153963168	-0.656054119486276	Cluster 1
TR405_c6_g1	-0.697072697008902	-0.547317948802386	1.47080556274257	-0.22641491693128	Cluster 1
TR4055_c0_g1	-0.750039308547812	-0.615936646312653	1.43302728597805	-0.0670513311175798	Cluster 1
TR40568_c0_g1	-0.704389976358943	0.143168694381899	1.35900129897895	-0.797780017001905	Cluster 1
TR40598_c0_g1	-0.156242070300444	-1.33851289398742	0.930168956871367	0.564586007416493	Cluster 1
TR40750_c0_g1	-0.562551947226006	-0.718710379745827	1.46104999599136	-0.17978766901953	Cluster 1
TR4076_c0_g1	-0.589966901464099	-0.412775477133585	1.49605941224514	-0.493317033647455	Cluster 1
TR40767_c0_g1	0.259158446791799	-1.25848477918846	1.15147847773096	-0.152152145334294	Cluster 1
TR40767_c1_g1	-0.480485908340501	-0.49882188402739	1.49979946584342	-0.52049167347553	Cluster 1
TR4077_c0_g1	-0.500489380520707	-0.501905461690937	1.4999975957315	-0.497602753519853	Cluster 1
TR40785_c0_g1	-0.403066568591409	-1.22596727502763	0.87642794674516	0.752605896873879	Cluster 1
TR4079_c1_g2	-0.185793748041389	-0.637687699321544	1.46525252576231	-0.641771078399377	Cluster 1
TR40790_c0_g1	-1.00823465252743	-0.403570254723047	1.34777369728607	0.0640312099643992	Cluster 1
TR4086_c0_g1	0.332271582658526	-0.253890534523597	1.148678028737	-1.22705907687193	Cluster 1
TR40975_c0_g1	-0.611588381355783	-0.0855828736019934	1.43845060631043	-0.74127935135265	Cluster 1
TR410_c0_g2	-0.374730241735593	-0.50898142399217	1.49305562402825	-0.609343958300486	Cluster 1
TR4104_c0_g1	-0.364256005407234	-0.561224648721706	1.49329533180912	-0.567814677680182	Cluster 1
TR41064_c0_g1	-0.0413041084469368	-0.674633771299967	1.42728641411081	-0.71134853436391	Cluster 1
TR41065_c0_g1	-0.44277378510755	-0.649297246712484	1.49103680992048	-0.398965778100442	Cluster 1
TR4112_c0_g1	-0.479715283879519	-1.06601378942341	1.2412920460617	0.304437027241229	Cluster 1
TR4113_c1_g1	-0.286165025559766	-0.747208677850501	1.47216007593524	-0.438786372524975	Cluster 1
TR4131_c0_g1	0.0568093439173988	0.267815478467738	1.03609422477923	-1.36071904716437	Cluster 1
TR4138_c3_g1	-0.503304196968169	-0.526523698579686	1.4995928124105	-0.469764916862644	Cluster 1
TR41466_c0_g1	-0.3676109608636	-0.487287462949164	1.49093109994838	-0.636032676135613	Cluster 1
TR41472_c0_g2	-0.479603796878421	-0.621304918683409	1.49331182209872	-0.39240310653689	Cluster 1
TR41494_c0_g1	-0.785827241831492	0.271093240631825	1.30056124303116	-0.785827241831492	Cluster 1
TR41506_c0_g1	-0.170223797490347	-0.570750379820575	1.45923556672141	-0.718261389410488	Cluster 1
TR4157_c0_g1	-0.312696262925057	-0.364302079743458	1.46551773015646	-0.788519387487942	Cluster 1
TR4159_c0_g1	-0.511783880378956	-0.417266080558144	1.49709443644749	-0.568044475510391	Cluster 1
TR4171_c0_g1	-0.861930762619419	-0.786383046373892	1.19846149862222	0.449852310371091	Cluster 1
TR41725_c0_g1	-0.420898682414419	-0.792279872780082	1.46076601543828	-0.247587460243776	Cluster 1
TR41738_c0_g1	0.0480989088084664	-0.795481953370791	1.39486835544553	-0.647485310883202	Cluster 1
TR4179_c0_g1	-0.909459099643735	-0.810484990914208	0.995792493399654	0.72415159715829	Cluster 1
TR4182_c0_g1	-1.00161767633387	-0.526643600035465	1.28930550647722	0.238955769892118	Cluster 1
TR4189_c0_g1	-0.495502777006107	-0.535521863243197	1.4994298541607	-0.4684052139114	Cluster 1
TR41902_c0_g2	-0.394014625048963	-0.0140719508946057	1.37905118767137	-0.970964611727803	Cluster 1
TR42055_c0_g1	-0.530287203003218	-0.652367710169426	1.48404116523922	-0.301386252066577	Cluster 1
TR421_c5_g1	-0.95988733543046	-0.037253744842879	1.38741341004987	-0.390272329776526	Cluster 1
TR42192_c0_g1	-0.829555298801394	-0.423602705770925	1.44730924471733	-0.194151240145007	Cluster 1
TR4226_c0_g1	-0.49927627387087	-0.503773132980039	1.49999397599851	-0.496944569147596	Cluster 1
TR4228_c0_g2	0.237805126133214	-0.786988039848637	1.3170159411158	-0.767833027400378	Cluster 1
TR4228_c0_g3	-0.70222746208881	-0.664225515378189	1.43558417839802	-0.0691312009310228	Cluster 1
TR42362_c1_g1	-1.42097308444937	0.627094858130762	0.766036805555928	0.0278414207626766	Cluster 1
TR4253_c0_g1	-0.581379635691868	-1.05590711115447	1.14012739022407	0.497159356622274	Cluster 1
TR4255_c0_g1	0.507644483658062	-0.956491645391618	1.15358689353292	-0.704739731799365	Cluster 1
TR4274_c0_g1	-0.691106071976725	-0.551830482520355	1.47158882063804	-0.22865226614096	Cluster 1
TR42749_c2_g1	-0.6048891138261	-0.704870785532893	1.45473332333384	-0.14497342397485	Cluster 1
TR4277_c0_g1	-0.458624493269829	-0.636598177225286	1.49224088854959	-0.397018218054479	Cluster 1
TR4290_c3_g1	-0.117765549668068	-1.00636015170895	1.38106871883462	-0.256943017457604	Cluster 1
TR4297_c1_g1	-0.731744896437677	0.188521098474412	1.33966226170583	-0.796438463742569	Cluster 1
TR42972_c0_g1	-0.454572510098502	-0.604596440824081	1.49573858933402	-0.436569638411433	Cluster 1
TR430_c6_g1	0.0771242021302401	-0.348557115442855	1.32645611785544	-1.05502320454282	Cluster 1
TR4306_c0_g1	-0.407758714837722	-0.571368209519249	1.49652086758953	-0.517393943232559	Cluster 1
TR4308_c0_g1	-0.881625061238258	-0.843925053636737	0.967097048811115	0.75845306606388	Cluster 1
TR43169_c0_g1	0.306960770943576	-0.529470998381897	1.25157966101192	-1.0290694335736	Cluster 1
TR43339_c0_g1	-1.27449645139521	0.623378355115592	0.948086490949758	-0.296968394670136	Cluster 1
TR4355_c4_g1	-1.12559524552742	0.177844048793332	1.26516905597282	-0.317417859238733	Cluster 1
TR437_c1_g1	-0.916909013033198	-0.482463346009987	1.38793957833205	0.0114327807111368	Cluster 1
TR4372_c0_g1	-0.465209475032874	-0.199783210136817	1.45556338813967	-0.790570702969976	Cluster 1
TR43727_c0_g1	-0.508527338735744	-0.560073969562759	1.49782613806961	-0.429224829771106	Cluster 1
TR43777_c0_g1	-0.541316354492955	-0.541316354492955	1.49732535482554	-0.414692645839633	Cluster 1
TR438_c0_g1	-0.565666408719498	-0.536227906552937	1.49577402147567	-0.393879706203234	Cluster 1
TR4383_c2_g1	-0.596397831777961	-0.536019376002917	1.49243980843952	-0.360022600658639	Cluster 1
TR43910_c0_g1	0.0291212607412292	-1.10832092350443	1.31045673335531	-0.231257070592114	Cluster 1
TR4398_c0_g1	-0.76900279993944	0.0209793802429386	1.40561847627689	-0.657595056580387	Cluster 1
TR4409_c0_g2	-0.837045848171516	-0.640356837119197	1.3703412804111	0.107061404879614	Cluster 1
TR44253_c0_g1	-0.0960151253023871	-0.591251034756804	1.4402268795358	-0.752960719476613	Cluster 1
TR44289_c0_g2	0.736297458805792	-0.90822478421222	0.985467495626703	-0.813540170220274	Cluster 1
TR4436_c0_g1	0.406801202577685	-0.796060669520604	1.22541553220013	-0.836156065257213	Cluster 1
TR4436_c0_g3	-1.25316296413367	0.463526313079073	1.0667420273204	-0.2771053762658	Cluster 1
TR4436_c8_g1	-1.30819832456241	-0.103569890415011	1.08094788539938	0.330820329578043	Cluster 1
TR4439_c0_g1	-0.656514342194807	0.408050789846986	1.21317998499174	-0.96471643264392	Cluster 1
TR4440_c0_g1	-0.662918256635783	0.115496498172821	1.3685543961574	-0.821132637694443	Cluster 1
TR4448_c0_g1	-0.979191742718182	0.149900040778351	1.3297554469512	-0.500463745011366	Cluster 1
TR44511_c0_g1	0.0151407679701735	-1.40451486186311	0.870653767607695	0.518720326285236	Cluster 1
TR4457_c0_g2	-0.253457625055461	0.574226947256798	0.969787044064664	-1.290556366266	Cluster 1
TR4490_c0_g1	-1.06362432340359	-0.436810972843659	1.27569192606468	0.224743370182574	Cluster 1
TR4490_c2_g1	-0.625053380829538	-0.053358215436668	1.42923791348218	-0.75082631721597	Cluster 1
TR45046_c0_g1	-0.67750972520277	-1.01018240846499	1.06334516120733	0.624346972460432	Cluster 1
TR4510_c0_g1	-0.672227442028367	-0.634538126514493	1.45701625377693	-0.150250685234072	Cluster 1
TR45119_c0_g1	-0.59975397054329	-0.34771728253288	1.49121707072826	-0.543745817652088	Cluster 1
TR4518_c0_g1	-0.560619494446883	-0.551459045191215	1.49498531852502	-0.382906778886923	Cluster 1
TR4518_c0_g2	-0.601497289027151	-0.508162605003382	1.49405815090377	-0.384398256873234	Cluster 1
TR45238_c0_g1	-0.354068557431288	-0.525738161034337	1.49137968130149	-0.611572962835862	Cluster 1
TR45456_c0_g1	0.756223054440379	-0.779491456115467	0.965638669516176	-0.942370267841087	Cluster 1
TR4548_c0_g1	-0.205681950829535	-0.763961531652557	1.46051469286518	-0.490871210383091	Cluster 1
TR4552_c0_g1	-0.58021742247095	-1.07858599224224	1.07858599224224	0.580217422470949	Cluster 1
TR4566_c0_g1	-1.0345731650844	-0.641660163323482	1.07586812609036	0.600365202317515	Cluster 1
TR4568_c0_g1	-0.504190439314541	-0.515222588628387	1.49984191488918	-0.480428886946256	Cluster 1
TR4573_c0_g1	0.2192525593428	-0.550296657721394	1.304448474861	-0.973404376482407	Cluster 1
TR4579_c0_g1	-1.00935868355853	-0.687368696269498	1.03447846980094	0.662248910027091	Cluster 1
TR4581_c0_g1	-0.470360640329782	-0.464535740759135	1.49845541454906	-0.563559033460142	Cluster 1
TR4585_c0_g1	-0.563952725927076	-0.513677870514972	1.49731634596917	-0.419685749527126	Cluster 1
TR4585_c0_g2	-0.525666459046096	-0.530010809947303	1.49880106091655	-0.443123791923155	Cluster 1
TR4595_c0_g1	-0.799509166820541	0.0223781191730939	1.40304025967065	-0.625909212023205	Cluster 1
TR4602_c2_g1	0.214637306557307	-0.669797825990391	1.32341696053174	-0.868256441098655	Cluster 1
TR46038_c0_g1	-0.385636941221072	-0.525200786615365	1.49480223882835	-0.583964510991909	Cluster 1
TR46042_c0_g1	-0.595741070079157	-0.564386276917096	1.48935267519789	-0.32922532820164	Cluster 1
TR4611_c1_g1	-1.14137655544672	-0.178123578361276	1.29022260712628	0.0292775266817155	Cluster 1
TR4611_c1_g2	-0.858752043677862	-0.507520866268923	1.41512575323994	-0.048852843293156	Cluster 1
TR46110_c0_g1	-0.664207324164436	-0.451063165098947	1.48861766108926	-0.373347171825877	Cluster 1
TR46269_c0_g1	-0.346131086972923	-1.2382564389902	1.00640434362182	0.577983182341306	Cluster 1
TR4633_c0_g1	-0.212922886766313	0.195025235290993	1.21652259965928	-1.19862494818396	Cluster 1
TR4638_c0_g1	-1.05261573905248	-0.287701719326931	1.34506701257975	-0.0047495542003392	Cluster 1
TR4641_c0_g2	-0.78804634459787	-0.476625620467627	1.45456265051077	-0.18989068544527	Cluster 1
TR46471_c0_g1	-0.598426826147743	-0.598426826147743	1.48373505919061	-0.286881406895122	Cluster 1
TR4656_c0_g1	0.142975639449975	0.200165895229965	1.02855808501285	-1.37169961969279	Cluster 1
TR4659_c0_g1	-1.24253800469163	-0.293556527111396	1.07637393274178	0.459720599061242	Cluster 1
TR4666_c1_g1	-0.508223705683564	-0.510137106734768	1.49987193872039	-0.48151112630206	Cluster 1
TR46703_c0_g1	0.308238096500755	-1.40981031022477	0.944926623699038	0.156645590024974	Cluster 1
TR4674_c0_g1	-0.803299776926468	0.506252585580525	1.1620075055205	-0.864960314174556	Cluster 1
TR46852_c0_g1	0.00314631390848875	-0.73938376849484	1.41269494491142	-0.676457490325066	Cluster 1
TR4689_c0_g2	-0.760017408122519	-0.605845889517634	1.43210887204069	-0.0662455744005365	Cluster 1
TR46954_c0_g1	-0.204302233413014	-0.812225952349299	1.45216155116996	-0.435633365407646	Cluster 1
TR4698_c0_g1	-1.2995485196207	-0.154433009203106	1.06632315878335	0.38765837004045	Cluster 1
TR47093_c0_g1	-0.140510619312048	-0.714262314836243	1.45324409047738	-0.598471156329092	Cluster 1
TR47244_c0_g1	-0.519956708518989	-0.554505327025234	1.49768261224573	-0.423220576701503	Cluster 1
TR47335_c1_g1	-0.579590101237712	-0.905849429749007	1.35109745454089	0.134342076445827	Cluster 1
TR4734_c0_g1	-1.02806632300359	-0.240429441789217	1.36934398712631	-0.100848222333505	Cluster 1
TR4746_c0_g1	-0.271082906326219	-0.522027164698727	1.47810251593895	-0.684992444914009	Cluster 1
TR47556_c0_g2	-0.60140205169517	-0.252926096507315	1.47821251958719	-0.623884371384709	Cluster 1
TR477_c1_g2	-0.515000766103071	-0.43357087205145	1.49822342300296	-0.549651784848442	Cluster 1
TR4770_c1_g1	0.0851511303889123	-1.29706954429622	1.14260935428843	0.0693090596188825	Cluster 1
TR478_c1_g1	-0.716106740568166	0.53107887408741	1.13846534461752	-0.953437478136765	Cluster 1
TR47837_c0_g1	0.0491673216620369	-0.951660825947424	1.36903675650071	-0.466543252215327	Cluster 1
TR47850_c0_g1	-0.235673658859968	-1.21328291042724	1.18418739698774	0.264769172299471	Cluster 1
TR4801_c0_g2	-0.637108796136646	-1.06026314580949	0.969926823969222	0.727445117976917	Cluster 1
TR4808_c1_g2	0.380934641034231	-0.176830257739456	1.08175323146231	-1.28585761475708	Cluster 1
TR4814_c0_g1	-0.541548793216101	-0.839069484879509	1.41475164511864	-0.0341333670230279	Cluster 1
TR48324_c0_g2	-0.311854958704961	-0.646928315795254	1.48552223394786	-0.526738959447649	Cluster 1
TR48348_c0_g1	-0.758311334547742	-0.534241227485756	1.45380466068562	-0.161252098652119	Cluster 1
TR48491_c0_g1	-0.674844760792501	-0.825647345938375	1.35735095690147	0.143141149829403	Cluster 1
TR485_c7_g1	-1.09733068018048	-0.202978956433102	1.32441824829721	-0.0241086116836253	Cluster 1
TR4853_c4_g1	-0.52806873746203	-0.52806873746203	1.49878332838488	-0.442645853460819	Cluster 1
TR4853_c5_g1	-0.537432692703794	-0.59445472906494	1.49255180175298	-0.360664379984244	Cluster 1
TR4860_c0_g1	-0.823471538423473	-0.236547979719918	1.45308044685092	-0.393060928707532	Cluster 1
TR48602_c0_g1	0.121924272647384	-0.894775605654426	1.35747187956441	-0.584620546557366	Cluster 1
TR4863_c0_g1	-0.665501321282213	-0.892527621805109	1.30187934028971	0.256149602797611	Cluster 1
TR48642_c0_g1	0.555080578159181	-0.488660679917912	1.07378835490052	-1.14020825314179	Cluster 1
TR48643_c0_g1	-1.36853932854945	0.605799155581597	0.865736272122715	-0.102996099154865	Cluster 1
TR4882_c0_g1	0.216175712835444	-0.410149595704004	1.27304655657	-1.07907267370144	Cluster 1
TR4887_c0_g1	-0.808391435947177	-0.873037886803391	1.13286689120625	0.548562431544316	Cluster 1
TR4891_c0_g1	-0.655209122723672	-0.690847105143042	1.44357908516296	-0.0975228572962467	Cluster 1
TR48964_c0_g1	-0.709808049221067	-0.682693962756961	1.42445789959644	-0.0319558876184109	Cluster 1
TR4898_c0_g1	-1.22617292416907	-0.229773209958126	1.16604535520806	0.289900778919132	Cluster 1
TR49075_c0_g2	-0.684238550448747	-0.628759749061011	1.45477745861175	-0.141779159101993	Cluster 1
TR4913_c0_g1	0.189448553091073	-0.266828948015597	1.24075460827252	-1.163374213348	Cluster 1
TR4921_c1_g1	-0.958819375092704	0.251750602933694	1.29356468229025	-0.586495910131243	Cluster 1
TR4923_c1_g1	-0.490259199039388	-0.298286575871548	1.48049772993679	-0.691951955025852	Cluster 1
TR49314_c0_g1	0.378730014385367	-1.04071188826903	1.21257256706575	-0.550590693182088	Cluster 1
TR4936_c0_g1	-0.572298811713018	-0.585478005127751	1.4897852183875	-0.332008401546728	Cluster 1
TR4944_c0_g1	-1.14346636536653	0.181513664908792	1.25455923582287	-0.292606535365133	Cluster 1
TR4949_c0_g2	-0.258896503146114	-0.259409169488978	1.42777576487511	-0.909470092240014	Cluster 1
TR49499_c0_g1	-0.759122821514298	-0.911557123023193	1.14935463337707	0.521325311160421	Cluster 1
TR4953_c0_g2	-0.214830703747704	-1.01022140558822	1.3815917687407	-0.156539659404782	Cluster 1
TR4960_c0_g1	-1.07666897405904	-0.437753173135565	1.25841904427996	0.256003102914646	Cluster 1
TR4971_c0_g1	-0.238147018004508	-0.463515415530725	1.46489458392041	-0.763232150385179	Cluster 1
TR4980_c2_g1	-0.611859875566793	-0.785663550365476	1.41703200167498	-0.0195085757427092	Cluster 1
TR4983_c0_g1	-0.65880081117917	-0.575299496807905	1.47539454730992	-0.241294239322846	Cluster 1
TR4984_c1_g1	-0.420440626511825	-0.652098362906166	1.49094940514038	-0.418410415722391	Cluster 1
TR4986_c1_g1	-1.34805529661055	0.320921915131926	1.03904483014876	-0.0119114486701356	Cluster 1
TR4986_c6_g2	-0.845495524730855	-0.809077914189684	1.18903498416924	0.465538454751303	Cluster 1
TR4994_c0_g1	-0.608878122953486	-0.619793709901156	1.47755835361556	-0.248886520760919	Cluster 1
TR50100_c0_g1	-0.321283862359289	-0.726101528931992	1.47790576685273	-0.430520375561447	Cluster 1
TR5011_c0_g1	-0.999401958539028	-0.544543188229294	1.27832478938934	0.265620357378986	Cluster 1
TR5018_c0_g1	-0.683745236844494	-0.828392802607003	1.34893371360761	0.163204325843884	Cluster 1
TR50186_c0_g1	-0.526377563416856	-0.529008007155874	1.49881528986798	-0.443429719295251	Cluster 1
TR5026_c0_g1	-1.09206505662877	-0.130078488133308	1.33344843210004	-0.111304887337958	Cluster 1
TR5040_c0_g1	-0.550826438316319	-0.956224209666779	1.32213092891721	0.184919719065883	Cluster 1
TR5051_c0_g1	0.148470968278113	0.151548086791649	1.05622092977124	-1.356239984841	Cluster 1
TR5058_c1_g1	0.141470448954111	-0.807397645135894	1.35921055652596	-0.69328336034418	Cluster 1
TR5058_c3_g1	-0.699885817709186	-0.738343483621398	1.40130120167624	0.0369280996543404	Cluster 1
TR50588_c0_g1	-1.3134806428034	0.746212307125524	0.811383687660504	-0.244115351982623	Cluster 1
TR5061_c3_g1	-1.20115084865406	-0.211227323835832	1.21373888940709	0.198639283082802	Cluster 1
TR5064_c1_g1	-0.264705623842236	0.274929548048352	1.18952028507662	-1.19974420928274	Cluster 1
TR5064_c2_g1	-0.665766143705529	-0.653099555549157	1.45331982083347	-0.134454121578787	Cluster 1
TR5065_c0_g2	-0.37247534412783	-0.80182774266624	1.46146284930603	-0.287159762511958	Cluster 1
TR5066_c0_g1	-0.563620642470895	-0.604157673464652	1.4881767724439	-0.320398456508351	Cluster 1
TR5075_c1_g1	0.169135419102224	-0.739028877898133	1.34862907165258	-0.778735612856668	Cluster 1
TR50751_c1_g1	-0.294561971054088	-0.500359586147538	1.48072514815865	-0.685803590957022	Cluster 1
TR51115_c0_g1	-0.595455070892176	-1.09190336040086	0.965316118489098	0.722042312803933	Cluster 1
TR51117_c1_g3	-0.50648611846096	-0.502382939779757	1.49996825664717	-0.49109919840645	Cluster 1
TR5118_c1_g1	-0.258295042436963	0.179771726315122	1.24298148465737	-1.16445816853553	Cluster 1
TR5118_c1_g2	0.155599081883643	0.194981479779751	1.02394234529881	-1.37452290696221	Cluster 1
TR51185_c0_g1	-0.5	-0.5	1.5	-0.5	Cluster 1
TR5129_c1_g1	-0.799962220976709	-0.811569895283505	1.25459613132623	0.356935984933985	Cluster 1
TR5146_c2_g1	-0.953048184533806	0.260442596974704	1.29076495863287	-0.59815937107377	Cluster 1
TR5151_c0_g1	-0.757274989185781	-0.784260289468571	1.32902603892738	0.212509239726967	Cluster 1
TR5152_c2_g1	-0.0808394262814541	0.00464594403916401	1.26090921222912	-1.18471572998683	Cluster 1
TR5156_c0_g1	0.573383198603507	-1.28611184896066	0.974084712976423	-0.261356062619273	Cluster 1
TR517_c1_g1	-0.262918146122224	-1.17118083272627	1.23226282626982	0.201836152578677	Cluster 1
TR5173_c0_g2	0.331978944206852	-0.100182994997334	1.07844047555954	-1.31023642476905	Cluster 1
TR5178_c0_g1	-0.553203192197485	-1.11776246165416	0.991223315051798	0.679742338799842	Cluster 1
TR518_c3_g1	-1.43723208095601	0.113524268655792	0.812477609007138	0.511230203293076	Cluster 1
TR51800_c0_g1	-0.62152135569696	0.35839552627781	1.23850605916256	-0.975380229743405	Cluster 1
TR5182_c0_g1	0.575072660080095	-0.276841567498707	0.979640248786815	-1.2778713413682	Cluster 1
TR5187_c0_g1	-1.04476072491913	-0.115850331843111	1.36182479101606	-0.201213734253824	Cluster 1
TR519_c1_g2	0.227335988526341	0.156214354808197	1.00203385634697	-1.38558419968151	Cluster 1
TR5193_c0_g1	-0.40526485732651	-0.54052611145768	1.49669518158186	-0.550904212797667	Cluster 1
TR51973_c1_g1	-0.50726154279325	-0.508753488507347	1.49990275790631	-0.483887726605717	Cluster 1
TR5198_c0_g1	0.506915864076898	0.233684618191478	0.728376979162975	-1.46897746143135	Cluster 1
TR52014_c0_g1	-0.560117562217058	-0.462249907040287	1.49859846989431	-0.476231000636968	Cluster 1
TR52015_c0_g1	-0.274726064618546	-0.00784931613195864	1.3422330585649	-1.05965767781439	Cluster 1
TR52070_c0_g1	-0.457578830709014	-0.526001833431857	1.4993190471643	-0.515738383023431	Cluster 1
TR52301_c0_g1	-0.487507386897481	-0.517392897205372	1.49987904857731	-0.494978764474453	Cluster 1
TR5240_c0_g1	0.197505610810867	-0.408699729301695	1.28280871972207	-1.07161460123124	Cluster 1
TR52535_c0_g1	0.329530669639201	-1.30873085030191	1.08087693003094	-0.101676749368229	Cluster 1
TR5255_c0_g1	-0.249670551911933	-0.238647569487565	1.41920898713737	-0.930890865737869	Cluster 1
TR5261_c0_g1	-0.0905938322950774	-0.565162634653731	1.4363401592907	-0.780583692341894	Cluster 1
TR5264_c1_g1	0.0831972305487096	-0.429981948536788	1.34558345357856	-0.998798735590477	Cluster 1
TR5275_c1_g1	0.521467648990136	-0.857369349504458	1.15196668178194	-0.816064981267616	Cluster 1
TR528_c1_g2	-0.269445130826542	-0.818087428045735	1.45666516437459	-0.369132605502314	Cluster 1
TR52800_c0_g1	-0.333891507255935	-0.376594411105198	1.47200121207417	-0.761515293713039	Cluster 1
TR5289_c0_g1	-0.425283732978562	-0.527622156805412	1.49790626950338	-0.545000379719405	Cluster 1
TR53043_c1_g1	0.298046575080001	-0.26332553500705	1.17453400683754	-1.20925504691049	Cluster 1
TR532_c1_g2	-0.0455214166499876	-0.712096507100691	1.4285360468853	-0.670918123134624	Cluster 1
TR5325_c0_g1	-0.531454832609344	-0.540084681041431	1.49799785700306	-0.426458343352288	Cluster 1
TR5329_c0_g1	0.303437307446707	-0.928389038528438	1.27443669127617	-0.649484960194442	Cluster 1
TR53312_c0_g1	-0.389104696628525	-0.52017154180866	1.49498120283591	-0.585704964398727	Cluster 1
TR5342_c0_g1	-0.495894092433787	-0.317131577310342	1.48424453662591	-0.671218866881781	Cluster 1
TR535_c2_g2	0.0906337733290239	0.0250321850146825	1.16373764954467	-1.27940360788837	Cluster 1
TR5356_c0_g1	-0.0498803110674422	-0.669063260609794	1.42985171330409	-0.710908141626858	Cluster 1
TR5360_c0_g1	-0.998987230389641	0.788005715667202	0.929752519733151	-0.718771005010713	Cluster 1
TR5369_c0_g1	-0.696277934740287	-0.223334431897828	1.47036922358072	-0.550756856942607	Cluster 1
TR5381_c0_g2	-0.425111208039937	-0.851916086231428	1.43792595866895	-0.160898664397586	Cluster 1
TR53859_c0_g1	-0.349365185786165	-0.802245982175639	1.46215799977173	-0.310546831809925	Cluster 1
TR53869_c1_g1	-0.616905348972877	-0.617478947623712	1.47634732747376	-0.241963030877166	Cluster 1
TR5387_c1_g2	-0.463415772878818	-0.914698346545881	1.39580082275328	-0.0176867033285779	Cluster 1
TR5398_c0_g1	-0.111574980998243	-1.011040981661	1.3783801498706	-0.255764187211357	Cluster 1
TR54129_c0_g1	-0.534106166661074	-0.492341473929682	1.49951310249057	-0.473065461899809	Cluster 1
TR5418_c0_g1	-1.11261193974229	0.369109836389281	1.19316900600256	-0.449666902649554	Cluster 1
TR5421_c0_g1	-1.30579554170876	-0.209113165042328	0.985155355310522	0.529753351440564	Cluster 1
TR54248_c0_g2	-0.497503095079914	-0.515951911955559	1.49988881199	-0.486433804954526	Cluster 1
TR5428_c0_g2	0.595031051875553	-1.0796116543946	1.06781060471377	-0.583230002194724	Cluster 1
TR544_c2_g1	-0.547162582947326	-0.786258837680612	1.43917553329843	-0.105754112670492	Cluster 1
TR5449_c0_g1	-0.513964747148015	-0.733410369525819	1.46629574952442	-0.218920632850585	Cluster 1
TR5449_c0_g2	-0.395867145662472	-0.6728409871255	1.48816371000361	-0.419455577215642	Cluster 1
TR5490_c0_g1	-0.0406318518621147	0.0517750353159389	1.21827609345772	-1.22941927691154	Cluster 1
TR54923_c0_g1	-0.600749194643685	0.0752586903180001	1.37974265583	-0.854252151504317	Cluster 1
TR54953_c0_g1	-0.587596155345476	-0.606222899141925	1.48421516436954	-0.290396109882137	Cluster 1
TR54962_c0_g1	0.525373366665996	-0.980696951109859	1.13830896110966	-0.682985376665795	Cluster 1
TR54983_c0_g1	-0.453999655878454	-0.522607812830236	1.49921528153893	-0.522607812830236	Cluster 1
TR5502_c0_g1	-0.65357166167012	-0.647607226143685	1.45895684634903	-0.157777958535222	Cluster 1
TR55061_c1_g1	0.0844438049042042	-1.07009223004023	1.31805765046127	-0.332409225325245	Cluster 1
TR553_c0_g1	-0.544871061305026	-0.589223293356989	1.49247854552634	-0.35838419086432	Cluster 1
TR55637_c0_g1	-0.476290761862132	-0.677863214511498	1.48471482124232	-0.330560844868693	Cluster 1
TR5582_c0_g1	-0.94026093510375	-0.76027419177012	1.0647234661071	0.63581166076677	Cluster 1
TR5584_c0_g1	-0.524280877446345	-0.521841794508702	1.49918232762222	-0.453059655667172	Cluster 1
TR5606_c0_g1	-0.248164124477214	-0.675396089481694	1.47562747104157	-0.552067257082657	Cluster 1
TR56094_c0_g1	-0.817944444436073	-0.641596244621067	1.38329602619595	0.0762446628611936	Cluster 1
TR5610_c0_g1	-0.506997211115422	-0.508306776194941	1.49991127324679	-0.484607285936431	Cluster 1
TR56115_c0_g1	-1.37091820961885	-0.0810160239751587	0.899119011175286	0.552815222418727	Cluster 1
TR56150_c1_g1	-0.464154821186021	-0.982007426756479	1.34538695396075	0.100775293981751	Cluster 1
TR56356_c1_g1	-0.578786095520018	-0.467778618144264	1.49758748616692	-0.451022772502642	Cluster 1
TR5657_c0_g1	-0.128514992207182	-0.494644034754263	1.43955282637829	-0.816393799416849	Cluster 1
TR56650_c1_g1	-0.35412158261924	-0.418566321450549	1.48198915937227	-0.70930125530248	Cluster 1
TR5668_c0_g2	0.239476920620003	-0.622373166959506	1.30544939736308	-0.922553151023576	Cluster 1
TR567_c0_g1	-0.84664079912341	-0.425660629233349	1.44009005383064	-0.167788625473879	Cluster 1
TR56737_c0_g1	-1.48470145588272	0.332149251258491	0.679111333619419	0.473440871004813	Cluster 1
TR5681_c0_g1	-0.734949225164141	-0.626872004460536	1.43576245316409	-0.0739412235394089	Cluster 1
TR56932_c0_g1	-0.758940508219806	-0.813709410874843	1.29880540581946	0.273844513275188	Cluster 1
TR571_c0_g2	0.697046728462542	-0.824269777172092	1.0192820587752	-0.892059010065655	Cluster 1
TR571_c15_g1	-0.129146890463155	-0.786621969184671	1.44409704790619	-0.528328188258361	Cluster 1
TR5710_c0_g1	-0.339003343726426	-0.994359473691991	1.37639887664427	-0.0430360592258493	Cluster 1
TR5729_c0_g1	0.133329226361715	-0.502229780129363	1.33812803866654	-0.969227484898894	Cluster 1
TR57354_c0_g1	-0.544241159084755	-0.490818714021221	1.49916736459543	-0.464107491489454	Cluster 1
TR57564_c0_g4	0.756929054980348	-0.682665898544859	0.952380465288704	-1.02664362172419	Cluster 1
TR576_c0_g1	-1.01265882713604	-0.617038167245021	1.17942349169717	0.45027350268389	Cluster 1
TR5773_c4_g4	-1.24860975002516	-0.34297611017095	0.964268899906851	0.627316960289255	Cluster 1
TR5779_c0_g1	0.230805765120883	-0.0341934466845756	1.1112870172487	-1.30789933568501	Cluster 1
TR578_c1_g2	0.638430763650906	-1.26897966602217	0.941094236789114	-0.310545334417848	Cluster 1
TR57803_c0_g1	-0.447744175266829	-0.577435591551014	1.49762706899595	-0.472447302178103	Cluster 1
TR57862_c0_g1	-0.84356447669153	-0.16638946266385	1.44058106345049	-0.430627124095113	Cluster 1
TR5789_c2_g1	0.334209777198124	-0.704523484737769	1.2629751045158	-0.892661396976158	Cluster 1
TR580_c0_g1	-1.22636373607969	-0.225423595271089	1.16825831265139	0.283529018699385	Cluster 1
TR58051_c0_g1	-0.514108851951071	-0.970104042382195	1.33081107490737	0.1534018194259	Cluster 1
TR5823_c0_g1	-0.685550860043204	-0.648846481485061	1.4478106515906	-0.113413310062331	Cluster 1
TR5827_c0_g1	-0.664776100725709	-0.977807109886069	1.17690810511174	0.46567510550004	Cluster 1
TR5841_c1_g1	-0.3198354288691	-0.611859081314801	1.4879300386519	-0.556235528468001	Cluster 1
TR586_c0_g1	-0.808346298503564	0.103246068638235	1.37415016973108	-0.669049939865755	Cluster 1
TR5868_c0_g1	-0.194088199527359	-0.957890259561125	1.40702738641197	-0.255048927323482	Cluster 1
TR58714_c0_g1	0.111481311561052	-0.833880210476666	1.36899050596971	-0.6465916070541	Cluster 1
TR5872_c0_g2	-0.315574257617381	-0.612346184265611	1.48741683099207	-0.559496389109077	Cluster 1
TR58875_c0_g1	-0.0952241009546843	-1.07920647748642	1.34107275511181	-0.166642176670698	Cluster 1
TR5911_c0_g1	-0.42799531679911	-0.964110521543978	1.37367065007584	0.0184351882672492	Cluster 1
TR59204_c0_g1	-0.628172698361793	-0.654437758920474	1.46427712614648	-0.181666668864212	Cluster 1
TR5931_c0_g1	-0.575351573597928	-0.585642937686879	1.48935334674791	-0.328358835463099	Cluster 1
TR5933_c0_g1	-0.63822613539649	-0.537015522375868	1.4858650194442	-0.310623361671844	Cluster 1
TR5937_c0_g1	0.477650573550355	-1.32933701937658	0.992424248671981	-0.140737802845752	Cluster 1
TR5954_c0_g1	-0.696397703876546	-0.426738697892877	1.48412081002589	-0.360984408256464	Cluster 1
TR59579_c0_g2	-0.0819174326394183	-0.676403943794055	1.43940631637835	-0.681084939944879	Cluster 1
TR5960_c0_g1	0.198575186390979	-0.426350087555277	1.28709945090246	-1.05932454973817	Cluster 1
TR5966_c0_g1	-0.616218635659595	-0.557117271449648	1.48709462004734	-0.313758712938101	Cluster 1
TR5971_c0_g1	-0.794947114781669	-0.44042524541077	1.45763030137496	-0.222257941182525	Cluster 1
TR59808_c0_g1	-0.363666131312381	-0.325952606583689	1.46813364122406	-0.778514903327985	Cluster 1
TR5986_c2_g2	-0.957578235086249	-0.440637220883191	1.37415570131903	0.0240597546504082	Cluster 1
TR5989_c0_g1	-1.4684294552047	0.353661033103322	0.777934082161855	0.336834339939528	Cluster 1
TR599_c6_g1	0.133230689694409	-0.752471923485322	1.36420720292725	-0.744965969136341	Cluster 1
TR601_c3_g1	-0.276868043647032	-0.8668393956396	1.44303113992992	-0.299323700643289	Cluster 1
TR60101_c0_g2	-0.768507491663314	-0.757683442484957	1.34218209811621	0.184008836032061	Cluster 1
TR6014_c0_g1	-0.0750172840039486	-0.675810014347458	1.43743587484556	-0.686608576494156	Cluster 1
TR60180_c0_g2	-0.698295643412981	-0.983383536714028	1.09707930368528	0.58459987644173	Cluster 1
TR6022_c0_g2	-0.758514109569305	-0.681355061747756	1.39956684289782	0.0403023284192353	Cluster 1
TR6031_c0_g1	-0.564305221208282	-0.582356709508408	1.49120990305387	-0.344547972337185	Cluster 1
TR6052_c0_g1	-0.740069752554052	-0.159114242703184	1.4552543391877	-0.556070343930465	Cluster 1
TR6055_c0_g1	-0.490762451348323	-1.0934898969275	1.1848756554586	0.399376692817221	Cluster 1
TR6066_c0_g1	-0.256809900463837	-0.493824857094065	1.47269138428318	-0.722056626725275	Cluster 1
TR60703_c0_g1	-0.644811676320132	-0.52125494792346	1.48654188852246	-0.320475264278868	Cluster 1
TR6073_c0_g1	-0.639162530274153	-0.245831742413136	1.47676755141192	-0.591773278724633	Cluster 1
TR60886_c0_g1	-0.176480626685987	-0.81682563280345	1.44752688882878	-0.454220629339345	Cluster 1
TR6089_c0_g2	-0.37083163800933	-0.124385533752346	1.41474013622995	-0.919522964468275	Cluster 1
TR609_c2_g1	0.665334279508229	-1.20613038725126	0.961899886980215	-0.421103779237182	Cluster 1
TR60951_c0_g1	-0.648003219327154	-0.549494416389059	1.48224964420914	-0.28475200849293	Cluster 1
TR6105_c1_g1	-0.413952144008555	0.0742145278102985	1.34575677096008	-1.00601915476183	Cluster 1
TR6112_c7_g1	0.575781013183422	-0.513035646362152	1.06482578399626	-1.12757115081754	Cluster 1
TR6122_c0_g1	-1.1368589089659	-0.174201765127698	1.29496974799747	0.016090926096133	Cluster 1
TR61251_c0_g1	-0.181159706616742	-0.751367307771078	1.45818714670197	-0.525660132314154	Cluster 1
TR6146_c0_g1	0.181484800849759	-1.24817097727283	1.18150309124639	-0.114816914823317	Cluster 1
TR61634_c0_g1	-0.234531984023901	-0.609783158462142	1.47494558841698	-0.630630445930933	Cluster 1
TR6165_c0_g1	-0.753011130369258	0.0172432701048727	1.40759536487673	-0.671827504612345	Cluster 1
TR61889_c0_g1	-0.680180172390509	-0.71181645947844	1.42464258769373	-0.0326459558247794	Cluster 1
TR61974_c0_g1	-0.735288346874361	-0.723709002829095	1.38952128543186	0.0694760642715931	Cluster 1
TR6202_c0_g1	0.143110226208805	-1.43846676607933	0.83656784527901	0.45878869459151	Cluster 1
TR62042_c0_g1	-1.27414668726346	0.491378458791367	1.03509770731091	-0.25232947883881	Cluster 1
TR62100_c0_g1	-0.426470011015958	-0.682352017625533	1.48655260982706	-0.377730581185563	Cluster 1
TR6214_c0_g1	0.113893749971434	-0.391505884619938	1.3210110215038	-1.0433988868553	Cluster 1
TR6214_c1_g1	0.689419842671452	-0.643082274615982	1.00398064120186	-1.05031820925733	Cluster 1
TR6216_c0_g1	-0.0852492165790865	-1.03074052772895	1.36657077485869	-0.250581030550648	Cluster 1
TR6218_c0_g1	-0.693400520732397	-0.697090047946137	1.4254949581189	-0.0350043894403652	Cluster 1
TR62241_c0_g1	-0.591982348095681	-0.816792482974829	1.40797951219712	0.000795318873393336	Cluster 1
TR62271_c0_g1	-0.590531500458405	-1.05153363898552	1.13516677031123	0.506898369132689	Cluster 1
TR62278_c1_g1	-0.228716262264266	-0.394358709935036	1.45128721055315	-0.828212238353849	Cluster 1
TR62387_c0_g1	-0.352461796680259	-0.575687601244423	1.4920882726131	-0.563938874688414	Cluster 1
TR62557_c0_g2	-0.87822879865114	-0.537207610091259	1.39269705341802	0.022739355324376	Cluster 1
TR6278_c0_g1	-0.484623890211924	-0.510643964854175	1.49990718731052	-0.504639332244425	Cluster 1
TR6278_c0_g2	-0.541638240622067	-0.322240472268825	1.48779111664542	-0.623912403754533	Cluster 1
TR63075_c0_g1	-0.0566792586875998	-0.688967877824825	1.43209593617336	-0.686448799660932	Cluster 1
TR6367_c0_g1	-0.301743635302239	-0.523764481140991	1.48370917438963	-0.658201057946395	Cluster 1
TR641_c1_g1	-0.831334985114713	-0.860786466068858	1.10710794313988	0.585013508043687	Cluster 1
TR6410_c1_g1	-0.708936749389811	-0.679507677333922	1.42627038075209	-0.0378259540283569	Cluster 1
TR6411_c0_g1	-1.05959392264776	0.801778971581939	0.903883902697118	-0.646068951631292	Cluster 1
TR6422_c0_g1	-0.524257755391127	-0.444810765146833	1.49886908920194	-0.529800568663985	Cluster 1
TR6433_c0_g1	-1.00750093380863	0.508277107813594	1.14459348706115	-0.645369661066116	Cluster 1
TR64338_c1_g1	-1.04697020679145	-0.612951015820293	1.1042553484569	0.555665874154845	Cluster 1
TR64689_c2_g1	-0.5	-0.5	1.5	-0.5	Cluster 1
TR6487_c0_g1	-0.877602588344176	-0.563643352514006	1.38150304165165	0.0597428992065286	Cluster 1
TR65202_c1_g1	0.471764380682509	-0.209069919054208	1.03038078123962	-1.29307524286792	Cluster 1
TR65313_c1_g1	-0.338422820078373	-0.757876456231849	1.47285424512982	-0.376554968819598	Cluster 1
TR65367_c0_g1	-0.52916614232158	-0.557016991917453	1.49698316577815	-0.410800031539122	Cluster 1
TR6537_c0_g2	-0.127346541202855	-0.337826974031211	1.40763198960238	-0.94245847436831	Cluster 1
TR657_c3_g1	-0.0730208289057998	0.00983968616461146	1.25481892509754	-1.19163778235635	Cluster 1
TR6573_c0_g1	0.530205840821371	0.0982546801361328	0.806427240943774	-1.43488776190128	Cluster 1
TR6582_c0_g1	-0.468309909838955	-0.885825777013613	1.41162784503304	-0.0574921581804677	Cluster 1
TR6584_c0_g1	-0.863426883447538	-0.858304377217461	0.994335375993968	0.727395884671031	Cluster 1
TR65855_c1_g1	-0.662470665200474	-0.126367236714541	1.45130856711549	-0.662470665200474	Cluster 1
TR6594_c0_g1	-0.50663163101883	-0.512164418553963	1.49986238646377	-0.481066336890973	Cluster 1
TR660_c0_g1	-0.510317532531907	-0.532933463208804	1.49921734003298	-0.455966344292269	Cluster 1
TR661_c2_g1	0.126073862931472	0.234408791514974	1.01645914229027	-1.37694179673672	Cluster 1
TR6610_c0_g1	-1.16013984812112	0.576405416922311	1.05063575246049	-0.466901321261678	Cluster 1
TR6613_c1_g1	0.0832938455478965	-0.678441806478833	1.38285696264465	-0.787709001713708	Cluster 1
TR6620_c0_g2	-0.60750382768414	0.499639127918566	1.14376776050086	-1.03590306073529	Cluster 1
TR66400_c0_g1	-0.177343262318306	-0.647220888481299	1.46340087682803	-0.638836726028429	Cluster 1
TR6641_c0_g1	-0.361334974133827	0.672363948335241	0.932831562198494	-1.24386053639991	Cluster 1
TR6656_c0_g1	-0.663540122345582	-0.663540122345582	1.45057824853466	-0.1234980038435	Cluster 1
TR66584_c0_g1	-0.232395985458708	-0.564664625825291	1.47312165989115	-0.676061048607151	Cluster 1
TR66700_c0_g1	-0.564537039288606	-1.10533186664451	1.01563906600988	0.654229839923245	Cluster 1
TR66721_c0_g1	-0.195301696528321	-0.784757726050162	1.45588537412021	-0.475825951541728	Cluster 1
TR6694_c0_g1	-0.755068086647136	-0.596806243099727	1.43748571585687	-0.0856113861100108	Cluster 1
TR6706_c0_g1	0.303948089285446	-1.11546719319671	1.22248070140479	-0.410961597493525	Cluster 1
TR671_c1_g1	-0.547654364081442	-0.554296912140476	1.49587809950857	-0.393926823286651	Cluster 1
TR67136_c0_g1	-0.545080887687266	-0.532816567714302	1.49760973892076	-0.419712283519195	Cluster 1
TR6722_c0_g1	-0.588184366415187	-0.430440199673311	1.49672364167106	-0.478099075582558	Cluster 1
TR67347_c0_g1	-0.977602570538055	-0.717926887738884	1.06161529144367	0.63391416683327	Cluster 1
TR6754_c3_g1	-0.00856065660845845	-1.06323355077054	1.3405988248846	-0.268804617505596	Cluster 1
TR6776_c0_g1	-0.860164995671745	-0.865304144264258	0.969371903262632	0.756097236673372	Cluster 1
TR679_c0_g5	-0.796269402225978	-0.877599886373282	1.14906785372983	0.524801434869433	Cluster 1
TR6791_c0_g2	-0.206088193150893	-1.31105212160724	0.968108487692086	0.549031827066051	Cluster 1
TR6796_c0_g2	-0.521146199615367	-0.227685232841665	1.46899139114882	-0.720159958691786	Cluster 1
TR68_c4_g1	-0.923995346146334	-0.494008127253965	1.37863657943882	0.0393668939614778	Cluster 1
TR6806_c2_g3	-1.03691366069854	-0.641249237537257	1.06874872922876	0.609414169007039	Cluster 1
TR6808_c0_g1	-0.162177997506417	-0.911987960003619	1.42169023788093	-0.347524280370894	Cluster 1
TR6843_c0_g1	0.212335039144615	-0.799110362372206	1.32880637400178	-0.742031050774192	Cluster 1
TR685_c2_g2	-0.953261467384262	-0.644057600337395	1.24630240501732	0.351016662704342	Cluster 1
TR685_c8_g1	-0.737699978444408	-0.594630891715796	1.4454792584624	-0.113148388302196	Cluster 1
TR6855_c0_g1	-0.545333196949832	-0.373515888321803	1.49406355328721	-0.575214468015576	Cluster 1
TR6860_c0_g1	-1.3721548582421	0.294712244379942	1.01300732028805	0.0644352935741092	Cluster 1
TR6869_c0_g1	0.0698264934503377	-0.744013326763943	1.38930643864982	-0.715119605336217	Cluster 1
TR690_c0_g1	-0.560990208958136	0.316610800677301	1.25249650734735	-1.00811709906651	Cluster 1
TR690_c0_g2	-0.517889962198115	0.226629423807619	1.29411029529655	-1.00284975690606	Cluster 1
TR69057_c0_g1	0.147590953951243	0.403435603465897	0.878532103994896	-1.42955866141204	Cluster 1
TR691_c2_g1	-1.05773847466972	0.654641685209179	1.02961544284689	-0.62651865338635	Cluster 1
TR6916_c0_g2	-0.949862008474362	-0.767547332822495	0.988869631270084	0.728539710026773	Cluster 1
TR6938_c1_g3	-0.75284407263495	0.306926731379056	1.28116485239193	-0.835247511136039	Cluster 1
TR6947_c0_g1	-0.692825255941203	0.169938270325201	1.34643398796121	-0.823547002345204	Cluster 1
TR696_c1_g3	-0.676289638744475	-0.818079891525024	1.36233006061799	0.132039469651508	Cluster 1
TR697_c2_g1	0.208726692477633	-0.503874030971441	1.30061056220609	-1.00546322371228	Cluster 1
TR697_c4_g1	-1.47752799915638	0.337456744198642	0.733058209217342	0.407013045740392	Cluster 1
TR6970_c0_g1	-0.699986256119588	-0.718739107906409	1.4118733604885	0.00685200353749212	Cluster 1
TR698_c0_g1	0.585811083805844	-0.270759526329882	0.968059826859795	-1.28311138433576	Cluster 1
TR7007_c0_g1	0.456426364926713	-0.76620972104163	1.19330748420598	-0.883524128091067	Cluster 1
TR701_c1_g1	-0.27239825439048	-0.615688033096485	1.4814386348402	-0.593352347353238	Cluster 1
TR70124_c0_g1	0.386801702113336	-0.695750714779835	1.2311802785644	-0.922231265897905	Cluster 1
TR702_c2_g1	-0.358771681386092	-1.10421216691799	1.2708607686668	0.192123079637283	Cluster 1
TR7022_c0_g1	-0.64587965331085	-0.675386845594087	1.45240957571932	-0.131143076814386	Cluster 1
TR7029_c0_g1	-1.28407706107613	0.518310508915878	1.01109546609308	-0.245328913932823	Cluster 1
TR7033_c0_g1	-0.229965562336036	-0.60695828747708	1.47404155530148	-0.637117705488363	Cluster 1
TR70397_c0_g1	0.20005210368722	-1.16280285268196	1.23782239156467	-0.275071642569927	Cluster 1
TR7047_c0_g2	-1.11395764287122	0.452108332043966	1.14813765422849	-0.486288343401242	Cluster 1
TR705_c0_g1	0.128224565547751	-0.501046646490505	1.34032017181827	-0.967498090875512	Cluster 1
TR705_c1_g1	0.351962567441675	-0.449527433464913	1.20405036430315	-1.10648549827992	Cluster 1
TR70585_c0_g1	-0.629380862848211	-0.402742498610899	1.49305679142824	-0.460933429969128	Cluster 1
TR707_c3_g1	-0.516982593734246	-0.615148797864934	1.49166285718757	-0.359531465588395	Cluster 1
TR707_c3_g2	-0.22153512842091	-0.895798449619296	1.43166454452327	-0.314330966483063	Cluster 1
TR70996_c0_g1	-1.11529496700036	0.494987248053007	1.12216184211786	-0.501854123170505	Cluster 1
TR710_c0_g1	-0.256223367436037	-0.39519197350304	1.45840399271419	-0.806988651775115	Cluster 1
TR71005_c0_g1	-0.473916323768389	-0.731733478776192	1.47264491452677	-0.266995111982191	Cluster 1
TR7101_c0_g1	-0.53628957961258	-0.541773914247041	1.49761509339583	-0.419551599536212	Cluster 1
TR71046_c0_g1	-1.11172484458758	0.703325980494257	0.97426618856591	-0.565867324472584	Cluster 1
TR713_c6_g1	0.683386556708724	-0.939410338760983	1.0273774843892	-0.771353702336936	Cluster 1
TR7137_c0_g2	-1.37451802375624	0.623182248096743	0.84475815853114	-0.0934223828716458	Cluster 1
TR7142_c0_g1	-0.925826712844119	-0.717515702454192	1.19431645956891	0.449025955729397	Cluster 1
TR7147_c1_g1	-0.88428144802601	-0.835105915663094	1.00546400992034	0.713923353768765	Cluster 1
TR7147_c1_g2	-0.660364945192274	-0.956180599165097	1.22241468774064	0.394130856616732	Cluster 1
TR71528_c0_g1	0.707562704216701	-0.866855098733241	1.01110479105789	-0.851812396541349	Cluster 1
TR71660_c0_g1	-0.448084035530144	-0.500057328797932	1.49868703515757	-0.550545670829497	Cluster 1
TR717_c3_g1	-0.824368599891727	-0.86679933665086	1.10926068956019	0.581907246982396	Cluster 1
TR7189_c0_g1	-0.551242568662111	-0.551242568662111	1.49583944616573	-0.393354308841512	Cluster 1
TR719_c0_g1	0.670313648116147	-1.26576993451374	0.918703984727715	-0.323247698330122	Cluster 1
TR7192_c1_g1	-0.161557503995582	-1.13777731537314	1.29589742566669	0.00343739370203373	Cluster 1
TR71929_c0_g1	-0.451545121726719	-0.523792341202995	1.49912980413271	-0.523792341202995	Cluster 1
TR72_c0_g2	-0.641559955040941	-0.231095068330742	1.47416962361163	-0.601514600239946	Cluster 1
TR7200_c0_g1	-0.662531874824113	-0.424219803865174	1.48957203128468	-0.402820352595391	Cluster 1
TR72011_c0_g1	0.617485932017862	-0.821316239674244	1.08257242348149	-0.878742115825113	Cluster 1
TR72070_c0_g1	0.184074304318337	-0.632755421094283	1.33453870630794	-0.885857589531996	Cluster 1
TR7209_c1_g1	-1.4119953139839	0.497637316962808	0.869853846723608	0.0445041502974868	Cluster 1
TR7226_c0_g1	0.144652580066158	0.217163847823106	1.0162676149405	-1.37808404282976	Cluster 1
TR7229_c0_g1	-0.541630530740032	-0.580674255445322	1.49380178077435	-0.371496994589001	Cluster 1
TR7247_c0_g1	-0.342636724437853	-0.580448514915266	1.49101734424326	-0.567932104890139	Cluster 1
TR7250_c0_g1	-1.03573946298047	-0.222040878338297	1.36609296489843	-0.108312623579657	Cluster 1
TR72665_c0_g1	-0.535120628556815	-0.902293613843575	1.37689869482535	0.0605155475750401	Cluster 1
TR7290_c0_g1	-0.425682209920278	-0.354405188724325	1.48295802432692	-0.70287062568232	Cluster 1
TR7292_c0_g1	0.141267906572575	-1.06999949037643	1.30218238632739	-0.373450802523538	Cluster 1
TR7293_c3_g1	-0.592673282834584	-0.979199336857139	1.26265177647368	0.309220843218044	Cluster 1
TR7318_c0_g1	0.621552757091009	-0.850728634007247	1.07990451092349	-0.850728634007247	Cluster 1
TR733_c1_g1	-0.841304435338881	-0.565429539197947	1.40445401671748	0.00227995781934661	Cluster 1
TR733_c1_g2	-0.626642789621143	-0.572675859642236	1.48288595544719	-0.283567306183808	Cluster 1
TR73384_c0_g1	-0.377123616632825	-1.22565175405668	0.989949493661167	0.612825877028341	Cluster 1
TR7345_c0_g1	-0.445424905786748	-0.881158233988928	1.42000994769091	-0.0934268079152363	Cluster 1
TR7366_c0_g1	-0.413426444986374	-0.674834050745957	1.48793163726278	-0.399671141530444	Cluster 1
TR7370_c1_g1	-0.0817151618391027	-0.12115536061514	1.3175902239024	-1.11471970144815	Cluster 1
TR7377_c0_g1	-0.248587729316485	-0.255367394661481	1.42372972244896	-0.919774598470996	Cluster 1
TR738_c1_g1	0.0307808378520842	-0.286110410854619	1.32862206663177	-1.07329249362923	Cluster 1
TR73929_c0_g1	0.129753093231452	-0.848955952857214	1.36055386331265	-0.641351003686891	Cluster 1
TR7396_c0_g1	-0.989105063530739	-0.716770208562429	1.01558206331932	0.690293208773843	Cluster 1
TR7404_c0_g1	-1.28302669242592	0.556452157395271	0.987886429208344	-0.261311894177691	Cluster 1
TR7416_c1_g1	-0.427274178147239	-0.24816812833774	1.46194048283771	-0.786498176352734	Cluster 1
TR7434_c0_g1	-0.51201117743005	-0.506889465120653	1.49986143910503	-0.480960796554329	Cluster 1
TR7436_c0_g1	0.00691834840500714	-0.715428182497303	1.41187525526805	-0.703365421175751	Cluster 1
TR7438_c0_g1	-0.722383100806864	0.429279724177867	1.20743028159998	-0.914326904970986	Cluster 1
TR7442_c0_g1	-0.59792046784876	-0.631230800319443	1.47731324507479	-0.248161976906588	Cluster 1
TR7445_c0_g1	0.0836481892955953	-0.186299258112696	1.26644424175561	-1.16379317293851	Cluster 1
TR746_c1_g1	-0.593980311392842	-0.809666779075917	1.41122981784824	-0.00758272737948315	Cluster 1
TR7463_c0_g1	0.2080118430306	-1.4679354278826	0.693965436435417	0.565958148416587	Cluster 1
TR74736_c0_g1	-1.4480862683126	0.477892483240808	0.804492371284778	0.165701413787014	Cluster 1
TR748_c1_g1	0.400892013365756	0.355517119619361	0.72334338594652	-1.47975251893164	Cluster 1
TR7483_c0_g1	0.494950430135432	-0.673401945762492	1.15825134671149	-0.979799831084426	Cluster 1
TR7497_c0_g1	-0.118662839973915	-0.550808107938623	1.44343603848867	-0.773965090576135	Cluster 1
TR75_c2_g1	-0.940575543348656	-0.484705352995731	1.37016061945576	0.0551202768886282	Cluster 1
TR7503_c0_g1	0.1220886357623	0.182353664479009	1.05307942421354	-1.35752172445485	Cluster 1
TR7577_c0_g1	0.0467077833692062	-0.844405774783543	1.39047297376834	-0.592774982353998	Cluster 1
TR7591_c0_g1	-0.941237482255185	-0.49615833253522	1.36478054408547	0.0726152707049321	Cluster 1
TR7594_c1_g1	-0.727536585959003	-0.1550901214436	1.4554934703501	-0.572866762947499	Cluster 1
TR7599_c0_g1	-1.16977784995274	-0.459246118870337	1.03113751218057	0.597886456642514	Cluster 1
TR761_c1_g1	-1.00166710459079	0.517330866323772	1.13987101833794	-0.655534780070917	Cluster 1
TR7614_c0_g1	-0.264247963433554	0.126069783093636	1.27423074550574	-1.13605256516582	Cluster 1
TR7625_c0_g1	-0.797080114688609	-0.78138319960062	1.29337963585296	0.285083678436268	Cluster 1
TR7632_c0_g1	0.315091827771677	0.214934638783986	0.899902260115908	-1.42992872667157	Cluster 1
TR7644_c0_g1	0.372288778012309	-1.16369511114539	1.16837798885624	-0.376971655723156	Cluster 1
TR7647_c0_g1	-0.267624657463668	-0.202735493377685	1.41345339402986	-0.94309324318851	Cluster 1
TR7647_c1_g1	-0.232730232943956	-0.920395443853737	1.42327986679796	-0.270154190000271	Cluster 1
TR7669_c0_g1	-0.495496089879711	-0.505897081391027	1.49998573953931	-0.498592568268576	Cluster 1
TR7677_c0_g1	-0.554890498292397	-0.534096029473945	1.49683042512825	-0.407843897361912	Cluster 1
TR770_c0_g2	-0.679259140361946	-0.557426419854766	1.47367523572383	-0.236989675507116	Cluster 1
TR770_c3_g1	-0.476066435099435	0.558610212152966	1.06731023352938	-1.14985401058291	Cluster 1
TR7703_c0_g1	-1.466716284337	0.477510691259022	0.750984375738462	0.238221217339512	Cluster 1
TR7706_c0_g1	0.651687793946847	-0.947098917675281	1.05177215049244	-0.756361026764009	Cluster 1
TR77110_c0_g1	-0.605303046378891	0.067255894042099	1.38354982029461	-0.845502667957817	Cluster 1
TR7712_c0_g2	-0.777878165830527	0.239537085985908	1.31621924567515	-0.777878165830527	Cluster 1
TR7717_c0_g1	0.430741630057156	-0.24514085142433	1.07705938573872	-1.26266016437155	Cluster 1
TR7720_c0_g1	0.618327553989721	-0.941673155617374	1.07781867209218	-0.754473070464523	Cluster 1
TR77287_c0_g1	-0.0900878941410994	-0.200225022883334	1.35131841211649	-1.06100549509206	Cluster 1
TR7741_c1_g1	-1.1533617391503	-0.194647950939722	1.27537985764982	0.0726298324401951	Cluster 1
TR7752_c2_g1	-0.743067056726428	0.133750544249043	1.36398087823168	-0.754664365754297	Cluster 1
TR7761_c0_g1	-1.44323758607928	0.527496872612026	0.78917217710428	0.126568536362979	Cluster 1
TR77639_c0_g1	-0.477999691395581	-0.567825136758509	1.49816010658884	-0.452335278434745	Cluster 1
TR7765_c0_g2	-0.593866417093439	-0.875925420388283	1.36732509019102	0.102466747290705	Cluster 1
TR7776_c0_g1	-0.974098549228242	-0.547677815022518	1.30553457012748	0.216241794123282	Cluster 1
TR77798_c0_g4	0.519892657331006	-0.54108681376521	1.11438874531041	-1.0931945888762	Cluster 1
TR7789_c0_g1	-0.504866035454399	-0.504866035454399	1.49996430823409	-0.490232237325286	Cluster 1
TR7789_c1_g1	-0.50646559618295	-0.529702653028504	1.49943150930715	-0.463263260095697	Cluster 1
TR7790_c0_g1	-0.0042636061795255	-0.534168945634856	1.40272643306394	-0.864293881249555	Cluster 1
TR77999_c0_g1	-0.651510857784017	-0.707487924323933	1.43829962637283	-0.0793008442648806	Cluster 1
TR780_c1_g1	-0.444702113241829	-0.584490596775606	1.49719290384823	-0.468000193830792	Cluster 1
TR7804_c0_g1	-0.872648487893074	0.130375856300978	1.35754455351165	-0.615271921919552	Cluster 1
TR7812_c0_g1	-1.24621293916065	-0.293389695067194	1.06618591644078	0.473416717787064	Cluster 1
TR78156_c0_g1	-0.448649456585018	-0.584617480557598	1.49722405205567	-0.463957114913057	Cluster 1
TR78193_c0_g1	-0.859900864363684	-0.353535907511096	1.44318968427881	-0.229752912404026	Cluster 1
TR7831_c0_g1	-1.19320885847002	0.291054462599944	1.18748694898247	-0.285332553112396	Cluster 1
TR78350_c0_g1	-0.754264407387693	0.421876702437184	1.21449353731917	-0.882105832368657	Cluster 1
TR784_c0_g1	-1.1638260764567	-0.489041351016441	0.968493655934521	0.684373771538622	Cluster 1
TR784_c4_g1	-0.262156278665605	-0.11986496517159	1.38347369478693	-1.00145245094973	Cluster 1
TR7842_c1_g1	-0.867278757569999	-0.671618231513808	1.32291689303476	0.215980096049045	Cluster 1
TR78751_c1_g1	-0.542917540295425	-0.371147019072014	1.49379006849645	-0.579725509129013	Cluster 1
TR788_c3_g1	-0.599887969414706	-0.397481408977905	1.49486994184533	-0.497500563452721	Cluster 1
TR788_c6_g1	-0.997509470216367	-0.314676629105471	1.37894756347983	-0.0667614641579932	Cluster 1
TR78903_c0_g2	-0.892249306252306	-0.785672308118399	1.13804250819863	0.539879106172075	Cluster 1
TR78926_c0_g1	-0.609352089314474	-0.554783245495267	1.48851679529058	-0.324381460480839	Cluster 1
TR7895_c0_g3	-0.427207469068514	0.471977550697834	1.11641450034805	-1.16118458197737	Cluster 1
TR78979_c0_g1	-0.673216684318824	-0.452160459617121	1.48710551162964	-0.361728367693696	Cluster 1
TR7901_c1_g1	-0.504443310017385	0.0510377937194061	1.37564657955329	-0.922241063255313	Cluster 1
TR7902_c2_g1	0.582489850103342	-0.96312678185404	1.10154021158157	-0.720903279830868	Cluster 1
TR7907_c0_g1	-0.281790072843852	-0.689940746773473	1.47895295073626	-0.507222131118933	Cluster 1
TR7908_c0_g1	-1.00300491359695	-0.674615707959645	1.0953929630938	0.582227658462799	Cluster 1
TR791_c0_g1	0.343189223669968	-0.813876947414161	1.2622450266837	-0.79155730293951	Cluster 1
TR79138_c0_g1	0.321438780255585	-0.923656132543142	1.26604483715785	-0.663827484870289	Cluster 1
TR7916_c0_g1	-0.944540733015406	0.0948665365037308	1.35700393520554	-0.507329738693865	Cluster 1
TR7920_c1_g1	0.185779068277014	0.176318097207351	1.01662434584922	-1.37872151133358	Cluster 1
TR79487_c0_g1	-0.711064277571059	-0.723176667166515	1.40373519601204	0.0305057487255306	Cluster 1
TR7952_c0_g1	-0.769155229688934	-0.359858874278978	1.47047763643071	-0.3414635324628	Cluster 1
TR7954_c0_g2	-0.424893639182833	-0.458241983673707	1.49501819364892	-0.611882570792377	Cluster 1
TR79567_c0_g1	-0.0485048424801492	-0.776077479682388	1.42604236891639	-0.601460046753851	Cluster 1
TR796_c7_g1	-1.35461846400376	0.0273552015504146	1.0400932003138	0.287170062139547	Cluster 1
TR7968_c0_g2	-0.555889719799285	-0.530368240554554	1.49699426694872	-0.41073630659488	Cluster 1
TR7970_c1_g1	-0.158605189737877	-0.287162873506228	1.40462581703113	-0.958857753787022	Cluster 1
TR7980_c0_g1	-0.116632424957376	-0.471194996827799	1.43224617847658	-0.844418756691402	Cluster 1
TR8012_c1_g1	-0.593193647825439	-0.670989536064841	1.46839739051871	-0.20421420662843	Cluster 1
TR80327_c0_g1	-0.5	-0.5	1.5	-0.5	Cluster 1
TR8038_c0_g1	-0.391822585971168	-0.167445549560328	1.43333390423641	-0.874065768704914	Cluster 1
TR8045_c1_g2	0.240461850038018	-0.67484454688089	1.31090492440081	-0.876522227557937	Cluster 1
TR80577_c0_g1	-0.714141251986705	-0.714141251986705	1.40696485466037	0.021317649313036	Cluster 1
TR8062_c2_g1	-0.143122497990517	-0.136620887860751	1.34853262606721	-1.06878924021594	Cluster 1
TR8078_c1_g2	-0.591405869220379	-0.531667902632462	1.49344916469793	-0.370375392845086	Cluster 1
TR8082_c0_g2	-1.05583060163613	-0.62669499155354	1.03751383779114	0.645011755398529	Cluster 1
TR8085_c0_g1	0.0944461384684596	-0.676993654820869	1.37826012282309	-0.795712606470679	Cluster 1
TR81_c1_g1	-0.562354598647179	-0.175933972353202	1.46007726596175	-0.721788694961372	Cluster 1
TR8100_c0_g2	-0.618560323923324	0.342348667301651	1.24761790035823	-0.971406243736559	Cluster 1
TR8102_c0_g1	0.247402381078072	-0.745083915107218	1.31180797408838	-0.814126440059238	Cluster 1
TR8134_c0_g1	-0.733605212347011	-0.544882788280952	1.46011559672161	-0.181627596093651	Cluster 1
TR8146_c0_g1	-0.0421434822726816	0.229749951744619	1.11612254664102	-1.30372901611295	Cluster 1
TR8159_c0_g1	-0.88213171804991	-0.646896593236601	1.32772132947512	0.20130698181139	Cluster 1
TR8183_c0_g1	-0.715397839090979	-0.780066570308243	1.364779681731	0.130684727668221	Cluster 1
TR8191_c0_g1	-1.2294552013492	-0.00283018480141353	1.21995071781049	0.0123346683401163	Cluster 1
TR8195_c0_g1	0.125039522540229	-1.44624794693214	0.760444443203841	0.560763981188067	Cluster 1
TR8246_c0_g1	-0.528679257191697	-0.533276268253753	1.49851068095355	-0.436555155508104	Cluster 1
TR82806_c0_g1	-0.680659717685856	-0.561910475690733	1.47245153848886	-0.229881345112268	Cluster 1
TR8283_c0_g2	-0.472513159525303	-0.516018207461137	1.49971568023248	-0.511184313246044	Cluster 1
TR8284_c1_g2	0.396207473225751	-1.46516991776771	0.784437614775816	0.284524829766144	Cluster 1
TR8305_c0_g1	-0.882619546974175	-0.652656637712913	1.32283425898859	0.212441925698498	Cluster 1
TR831_c0_g2	-0.350711550846902	-0.448853054787599	1.48511187580849	-0.685547270173985	Cluster 1
TR83169_c0_g1	-0.598171901660273	-0.883547630635717	1.35883532159838	0.122884210697611	Cluster 1
TR83231_c0_g1	-0.767326168518366	-0.767326168518366	1.33514753322196	0.199504803814775	Cluster 1
TR8328_c0_g1	0.0572004997560119	-0.40667204621055	1.35165564491946	-1.00218409846492	Cluster 1
TR833_c0_g4	-0.451071599568173	-0.592460124345098	1.49671359997065	-0.453181876057381	Cluster 1
TR834_c4_g1	0.325477782385384	-1.42311415310764	0.913789087784906	0.183847282937351	Cluster 1
TR8340_c0_g2	-0.881354162113712	-0.832221222309238	1.03349702842892	0.680078355994027	Cluster 1
TR8357_c0_g1	-1.18309202284825	-0.118176419790678	1.25877804451194	0.0424903981269853	Cluster 1
TR83676_c0_g1	-0.71226938600654	-0.78241712856779	1.36518298984587	0.129503524728462	Cluster 1
TR83723_c0_g1	-0.620122566153898	-0.582861982779844	1.48243892423915	-0.279454375305405	Cluster 1
TR83767_c1_g1	-0.992340156105247	-0.57905119906054	1.25756712612724	0.313824229038548	Cluster 1
TR8383_c3_g1	-0.696510258226887	-0.310693657131834	1.48112767295385	-0.473923757595126	Cluster 1
TR8390_c0_g1	-0.61861516494646	-0.69251308510296	1.45500526126321	-0.143877011213792	Cluster 1
TR83961_c0_g2	-0.51408097595281	-0.51408097595281	1.49969829536578	-0.471536343460163	Cluster 1
TR8399_c0_g1	0.514412047178566	-0.14815803147719	0.967168267593332	-1.33342228329471	Cluster 1
TR8424_c0_g1	0.0439809624578703	-1.00527914189417	1.35398534423872	-0.392687164802412	Cluster 1
TR8439_c0_g1	0.511378842179025	-0.638972384333712	1.14130916447028	-1.01371562231559	Cluster 1
TR8446_c0_g1	-0.719107303995639	-0.633060276167101	1.4402633467491	-0.0880957665863603	Cluster 1
TR845_c0_g2	-0.58651336378252	-0.300701808638868	1.48572205096456	-0.598506878543171	Cluster 1
TR846_c0_g1	-0.775130249782096	-0.70466386343827	1.37539946678507	0.104394646435299	Cluster 1
TR8480_c1_g1	-0.912662415715668	-0.679798149411943	1.2636468340748	0.328813731052811	Cluster 1
TR8497_c0_g1	-1.01390240655976	-0.574893117121515	1.22992285056906	0.358872673112218	Cluster 1
TR8498_c0_g1	-1.48215266121951	0.595135467548498	0.610298154619798	0.276719039051213	Cluster 1
TR8503_c0_g1	-0.87896108698842	-0.504935092525263	1.40429759739349	-0.0204014178798088	Cluster 1
TR8537_c0_g2	-0.874833132916778	-0.528841555943434	1.39820013859165	0.00547455026856555	Cluster 1
TR8538_c0_g1	-0.501229579930919	-0.49958987862933	1.49999941186418	-0.499179953303932	Cluster 1
TR8545_c1_g1	-0.244286671940421	0.587814804356638	0.954244812267269	-1.29777294468349	Cluster 1
TR8573_c0_g1	-0.67077724711645	0.567125133875498	1.10611612272845	-1.0024640094875	Cluster 1
TR8636_c0_g1	-0.838418649468516	-0.86932559402451	1.05774951039658	0.649994733096449	Cluster 1
TR86413_c0_g1	-0.65735847812286	-0.452310879442334	1.48961049629676	-0.379941138731561	Cluster 1
TR8661_c0_g1	0.302716186301268	-0.750083051712675	1.28332246793199	-0.835955602520586	Cluster 1
TR8667_c1_g1	-0.903698273307431	-0.81350579074577	1.01213193211752	0.705072131935683	Cluster 1
TR8684_c0_g1	0.353995280094398	-1.41798109371146	0.917987760244794	0.145998053372266	Cluster 1
TR8688_c0_g1	-0.530650856976337	-0.530650856976337	1.49854513631709	-0.437243422364417	Cluster 1
TR86983_c0_g1	0.0943172481916179	-0.705824681521888	1.37951931146202	-0.768011878131746	Cluster 1
TR87119_c0_g1	-0.476162670471738	-0.565910608361699	1.49829196310741	-0.456218684273969	Cluster 1
TR8745_c3_g1	-0.853027732787466	-0.660253103908943	1.3446030364277	0.168677800268708	Cluster 1
TR8759_c0_g1	-0.627405505710164	-0.646044608267071	1.46683080300514	-0.193380689027907	Cluster 1
TR876_c4_g1	-0.669601757887675	-0.302635380966777	1.48296930673369	-0.510732167879238	Cluster 1
TR8794_c0_g1	-1.17382291585169	-0.142717395047001	1.26454250030017	0.0519978105985198	Cluster 1
TR882_c0_g1	-1.26938176523049	-0.152164364226357	1.13215130412449	0.289394825332356	Cluster 1
TR882_c1_g1	-0.746324548986574	-0.910827523607146	1.17521446028418	0.481937612309539	Cluster 1
TR882_c1_g2	-0.845977778730687	-0.789356020240616	1.22020904272958	0.415124756241723	Cluster 1
TR8823_c0_g2	-0.0409689616739917	-0.395057844713492	1.39001834251043	-0.953991536122951	Cluster 1
TR8830_c0_g1	-0.306538901028714	-0.596447756414574	1.48652751276192	-0.583540855318629	Cluster 1
TR8849_c0_g1	-0.268974783107449	0.335038764923314	1.15297377788164	-1.2190377596975	Cluster 1
TR8852_c0_g1	-0.719101803126532	-0.0302534739179447	1.42377502638451	-0.674419749340029	Cluster 1
TR8859_c0_g1	0.0166428826356277	-0.179975358734114	1.29698371423229	-1.13365123813381	Cluster 1
TR8867_c0_g1	-0.507649710152297	-0.484612122009243	1.49991154231384	-0.507649710152297	Cluster 1
TR88672_c0_g1	-0.555856078932544	-0.480189806407695	1.4987742442422	-0.462728358901961	Cluster 1
TR887_c2_g1	-1.06915855720833	-0.615092510615827	1.01563396771158	0.668617100112582	Cluster 1
TR889_c0_g1	-0.206633972775145	-0.803289569163377	1.45418658340509	-0.444263041466562	Cluster 1
TR8891_c0_g1	-0.356198538797675	-1.06175879223184	1.31745601586011	0.100501315169402	Cluster 1
TR89_c7_g1	-1.34597305333644	0.0254414348515441	1.05763679168561	0.262894826799287	Cluster 1
TR8909_c0_g1	-0.497365328611856	-0.168980092038181	1.45166842971311	-0.785323009063069	Cluster 1
TR8913_c0_g1	-0.555795528201277	-0.721612978603868	1.46165011836358	-0.184241611558434	Cluster 1
TR8915_c0_g1	-0.520820837916146	-0.785614184837544	1.44636622789716	-0.139931205143471	Cluster 1
TR89501_c0_g1	-0.691172600421568	-0.691172600421568	1.42911627906715	-0.0467710782240159	Cluster 1
TR8964_c0_g1	0.447324334007376	-0.633618627455344	1.18426482902522	-0.997970535577248	Cluster 1
TR8995_c0_g1	-0.547464131365674	-0.551030672938089	1.49616418962802	-0.397669385324252	Cluster 1
TR9_c3_g1	-0.896730074711781	-0.640775405220212	1.31798880158332	0.219516678348672	Cluster 1
TR902_c0_g1	-0.364096111072084	-0.809318806607646	1.45962950766688	-0.286214589987146	Cluster 1
TR9023_c1_g1	-0.800450237383849	-0.666421360426553	1.38124203753213	0.0856295602782717	Cluster 1
TR9036_c0_g2	-0.509750013538129	-0.511362030578669	1.49983072962454	-0.478718685507742	Cluster 1
TR904_c0_g1	-0.49846762356833	-0.480866559894745	1.49980313662339	-0.520468953160311	Cluster 1
TR9046_c1_g1	-0.852206133166107	-0.382623161829681	1.44353283781198	-0.20870354281619	Cluster 1
TR9049_c0_g3	-0.0293536799106137	-0.776707689063386	1.42062492138828	-0.614563552414281	Cluster 1
TR9076_c0_g2	-0.733748229498265	-0.107128622030227	1.44430366453638	-0.603426813007886	Cluster 1
TR9079_c1_g1	-0.859246509382957	-0.482958692957185	1.42199837769829	-0.0797931753581438	Cluster 1
TR9086_c0_g1	-0.593947063308609	-0.52205480793276	1.49393778583929	-0.37793591459792	Cluster 1
TR9107_c0_g1	-0.53004866543505	-0.540382182995137	1.49805611922555	-0.427625270795365	Cluster 1
TR912_c1_g1	-0.228327880515175	-0.548277776778479	1.4712847502411	-0.694679092947444	Cluster 1
TR9124_c1_g2	-0.493809951884958	-0.519395959754644	1.49985178132105	-0.486645869681445	Cluster 1
TR9164_c0_g1	-0.371581280753186	-0.332956855034856	1.4709468794397	-0.766408743651662	Cluster 1
TR9186_c0_g1	-1.10872041023959	-0.249701648061076	1.30600162202599	0.0524204362746727	Cluster 1
TR9193_c0_g1	-0.232259447445659	-0.62115898735467	1.474577422155	-0.62115898735467	Cluster 1
TR9196_c0_g1	0.216897979252562	-0.675133146687553	1.32277218332901	-0.864537015894016	Cluster 1
TR9199_c3_g1	0.111275356880309	0.437045528260868	0.876118024722731	-1.42443890986391	Cluster 1
TR921_c1_g1	-1.18551745270628	0.333086898982842	1.17464114580072	-0.32221059207728	Cluster 1
TR922_c5_g1	-0.643876504161353	-0.593517447969962	1.47531479923962	-0.237920847108305	Cluster 1
TR923_c1_g1	-0.866007105557419	-0.120831857562815	1.42843439741865	-0.441595434298413	Cluster 1
TR9236_c0_g1	-0.926823456782061	-0.349831610812585	1.41411488972267	-0.137459822128022	Cluster 1
TR92494_c0_g1	-0.51875907175726	-0.499125375369049	1.49983033815567	-0.481945891029365	Cluster 1
TR925_c2_g1	-0.848107411182352	0.227746474020944	1.31924476695091	-0.698883829789501	Cluster 1
TR925_c6_g1	-0.400415884949718	-0.0597635649178681	1.39846741907812	-0.938287969210533	Cluster 1
TR925_c7_g1	0.618304777940125	-0.497640366494432	1.02658391733287	-1.14724832877856	Cluster 1
TR9262_c1_g1	-0.40582733124327	-0.169019400762787	1.43666490648369	-0.861818174477634	Cluster 1
TR9275_c0_g1	-0.15929361022927	-0.178730771439324	1.37016801248684	-1.03214363081825	Cluster 1
TR928_c10_g1	-1.46146725429212	0.194225495668452	0.741877712963102	0.525364045660566	Cluster 1
TR928_c2_g1	-1.06408770017254	0.496723763094242	1.13809169196536	-0.570727754887064	Cluster 1
TR9281_c0_g2	-0.00324620831364657	-0.786664481340369	1.41210061643629	-0.622189926782272	Cluster 1
TR9290_c0_g1	-0.601628578570922	-0.657421027897438	1.47013103975368	-0.211081433285316	Cluster 1
TR932_c3_g1	-0.53113721216872	-0.502231785656136	1.49946900034026	-0.466100002515407	Cluster 1
TR9338_c0_g1	-0.663296458580322	-0.985585289988674	1.16300691940034	0.485874829168653	Cluster 1
TR9339_c0_g1	-0.508028813218297	-0.512051061507525	1.49984521112606	-0.479765336400243	Cluster 1
TR9342_c0_g1	-1.13322875901493	0.0620499896866964	1.28998662769712	-0.218807858368878	Cluster 1
TR94_c0_g4	-1.17885041785057	0.0404287296268841	1.26227478057271	-0.123853092349025	Cluster 1
TR94_c4_g2	-0.0915253063487126	-0.300707434068994	1.3844502660617	-0.992217525643996	Cluster 1
TR9419_c0_g1	0.315737412615696	-1.48463762102274	0.66506391167987	0.503836296727175	Cluster 1
TR94447_c0_g1	-0.60862433057472	-0.60862433057472	1.47991810908169	-0.262669447932247	Cluster 1
TR9514_c0_g2	0.555635037640371	-1.46302750964048	0.717457171185984	0.189935300814129	Cluster 1
TR9526_c1_g1	0.0281955897234558	-0.544009025252555	1.3915352810576	-0.875721845528504	Cluster 1
TR9534_c0_g1	0.440490656666201	-1.48589690228546	0.683391124817234	0.362015120802021	Cluster 1
TR9558_c0_g1	-0.528192877656269	-0.50437741779415	1.49952341917553	-0.466953123725107	Cluster 1
TR9561_c0_g1	-0.119953973068447	-0.752046765285417	1.44591226219632	-0.573911523842453	Cluster 1
TR9579_c0_g1	-0.527773581392731	-0.22522821626314	1.46902582846257	-0.716024030806699	Cluster 1
TR960_c0_g2	-1.1111735194033	0.132562056038064	1.28582331245561	-0.307211849090374	Cluster 1
TR9617_c0_g1	-0.604722109193939	-0.797639591881575	1.41349155584595	-0.0111298547704404	Cluster 1
TR9629_c0_g1	0.144877119281964	0.0106406923766415	1.14019111389703	-1.29570892555564	Cluster 1
TR9639_c1_g1	0.177634671393191	-0.708448865909316	1.34375404359791	-0.812939849081782	Cluster 1
TR9650_c0_g2	0.559118427136681	-1.01160564511794	1.10989180312207	-0.657404585140808	Cluster 1
TR9662_c0_g1	-0.490020463615369	-0.541943161746799	1.49926790854504	-0.467304283182868	Cluster 1
TR9664_c0_g1	-1.147116298444	-0.440592464943288	1.1326706438557	0.455038119531593	Cluster 1
TR9688_c1_g1	-0.581403656031444	-1.0415520041205	1.17213464344307	0.450821016708874	Cluster 1
TR9735_c0_g1	-0.407595004739331	-0.369303859107764	1.48291163991344	-0.706012776066341	Cluster 1
TR9745_c0_g1	-1.46077081835467	0.269926697336407	0.800645516803253	0.390198604215009	Cluster 1
TR9748_c0_g1	-0.481367093504113	-0.515673879678126	1.49984980804511	-0.502808834862871	Cluster 1
TR97487_c0_g1	-0.667409545671774	-0.693973109678611	1.43775290187004	-0.0763702465196558	Cluster 1
TR9764_c0_g1	-0.348284459132046	-0.222950259305981	1.44013816146296	-0.868903443024932	Cluster 1
TR9770_c0_g1	-0.102311966470623	-0.695946233465009	1.44473491115111	-0.646476711215477	Cluster 1
TR9781_c0_g1	-0.913890529538784	-0.777197501616317	1.10135525354674	0.589732777608361	Cluster 1
TR9783_c0_g1	-0.620091126943801	0.544161601195581	1.11418325826193	-1.03825373251371	Cluster 1
TR97858_c0_g1	-0.461113117491591	-0.519162577018445	1.49943827152848	-0.519162577018445	Cluster 1
TR9787_c0_g1	-1.11472001646882	-0.561016540622079	0.976816509276804	0.698920047814098	Cluster 1
TR9799_c1_g1	-0.941829067440894	-0.617207710862626	1.2878070922151	0.271229686088421	Cluster 1
TR98072_c0_g1	-0.949683547308142	-0.737229879087596	1.10012265491551	0.58679077148023	Cluster 1
TR9849_c0_g1	-0.69152153440659	-0.329667192521241	1.48314366854435	-0.461954941616519	Cluster 1
TR98546_c1_g1	-0.587098088436784	-0.598260465255326	1.48566942232943	-0.300310868637317	Cluster 1
TR9874_c0_g2	-0.545707505016463	-0.454920722988407	1.49896871631104	-0.498340488306173	Cluster 1
TR9887_c0_g1	-0.844222022849003	-0.748465004131215	1.27528157356263	0.317405453417591	Cluster 1
TR9897_c0_g2	-0.404491187087461	-0.343648501564556	1.47825191492688	-0.73011222627486	Cluster 1
TR9921_c0_g1	-0.139983539940352	-1.34150892442837	0.944888894597374	0.536603569771349	Cluster 1
TR9925_c0_g1	-0.0150376635703779	-0.796996169230028	1.41469711896709	-0.602663286166683	Cluster 1
TR9930_c0_g1	-0.356877048241731	-0.442140344146578	1.48531169210241	-0.686294299714106	Cluster 1
TR996_c2_g1	0.231666318822955	-0.88483402905901	1.31402636708891	-0.66085865685285	Cluster 1
TR997_c7_g1	-0.677409611088788	-0.574541046605316	1.47076186399065	-0.218811206296548	Cluster 1
TR9979_c0_g1	-0.0061640640760688	-0.870583402743613	1.40214328130344	-0.525395814483755	Cluster 1
TR99895_c0_g1	-0.790138422407554	-0.570801363105051	1.43006595978746	-0.0691261742748582	Cluster 1

## Sheet: Cluster 2
Gene	G	T	P	C	Cluster
TR10_c0_g2	-1.18572606492239	-0.468227232668659	0.767663065844482	0.886290231746562	Cluster 2
TR10_c3_g1	-0.867327049906099	-0.771411555899133	0.425709620659041	1.21302898514619	Cluster 2
TR10_c5_g2	-0.770524597322287	-0.567628906000253	-0.101884294944553	1.44003779826709	Cluster 2
TR100_c0_g1	-0.696420274457738	-0.527720865827951	-0.250266000873377	1.47440714115907	Cluster 2
TR10017_c0_g1	-0.541191401720457	-0.651388745962179	-0.290186339836535	1.48276648751917	Cluster 2
TR10025_c0_g1	-0.491880532858555	-0.610846987317368	-0.391216609854944	1.49394413003087	Cluster 2
TR10029_c0_g1	-0.184531736504236	-0.500137547684184	-0.771537984659774	1.45620726884819	Cluster 2
TR10035_c0_g1	-1.34024168697414	0.147183876904786	0.111556917290919	1.08150089277843	Cluster 2
TR10043_c0_g1	-0.601023552287829	-0.557867745556129	-0.330510324725706	1.48940162256966	Cluster 2
TR10045_c0_g1	-0.890836648542194	0.125648909223859	-0.591538123199967	1.3567258625183	Cluster 2
TR100476_c0_g1	-0.557702171971232	-0.479645400797652	-0.461342433763847	1.49869000653273	Cluster 2
TR1006_c0_g2	-1.49259942092093	0.615778284588382	0.373002539851144	0.503818596481403	Cluster 2
TR1009_c2_g1	-0.468680712630683	-0.0647143484692778	-0.880885864482223	1.41428092558218	Cluster 2
TR10106_c0_g1	-0.216120805963101	-0.850917199235671	-0.377509719506974	1.44454772470575	Cluster 2
TR1014_c1_g2	-0.741755597025232	-0.621756971289567	-0.0711160957843669	1.43462866409917	Cluster 2
TR10154_c0_g1	-1.18215816742611	-0.118633119171859	0.0411340965972776	1.25965719000069	Cluster 2
TR10173_c0_g1	-0.4362745343782	-1.13320973362214	0.401427774416002	1.16805649358434	Cluster 2
TR10186_c2_g1	-0.375578123535425	-0.574571783260639	-0.544095276816237	1.4942451836123	Cluster 2
TR10193_c1_g1	-0.835707016899973	-0.475094436450634	-0.124592489098004	1.43539394244861	Cluster 2
TR102_c5_g1	-0.575565844134405	-0.714926930155341	-0.168669346625365	1.45916212091511	Cluster 2
TR102060_c0_g1	-0.786037932781059	0.159778292658726	-0.72622447396019	1.35248411408252	Cluster 2
TR10240_c0_g1	-1.47138218833262	0.240292840600183	0.51679419142779	0.714295156304652	Cluster 2
TR1025_c0_g1	-0.917684547466146	-0.350619859622953	-0.150265654124123	1.41857006121322	Cluster 2
TR102637_c0_g1	-0.826167802895416	0.0741127597050715	-0.631236263694919	1.38329130688526	Cluster 2
TR10271_c0_g1	-0.662529547774012	-0.419777953875641	-0.407304551817622	1.48961205346727	Cluster 2
TR10273_c0_g1	-1.20288736579078	-0.408339617983947	0.595500968481774	1.01572601529296	Cluster 2
TR10291_c0_g2	-0.75582097148055	-0.605491938478894	-0.0728446240162348	1.43415753397568	Cluster 2
TR1031_c1_g1	-0.734254521163133	-0.489733222123509	-0.245898508391046	1.46988625167769	Cluster 2
TR10343_c0_g1	-0.551392969619255	-0.50309577520005	-0.444065870909911	1.49855461572922	Cluster 2
TR10351_c0_g2	0.0376219668163784	-0.793332778519284	-0.642844911253771	1.39855572295668	Cluster 2
TR1038_c14_g1	-0.458517547260327	-0.63142652131136	-0.402939662743924	1.49288373131561	Cluster 2
TR10398_c0_g1	-0.574463414415556	-1.0457783879105	0.446976577322662	1.17326522500339	Cluster 2
TR1042_c1_g1	-0.176242973075704	-0.789902350080247	-0.486018226587597	1.45216354974355	Cluster 2
TR1042_c8_g1	-0.666005316826066	-0.507534598352983	-0.31051694835942	1.48405686353847	Cluster 2
TR1043_c2_g1	-0.762394885097458	-0.428797948790624	-0.277735185179982	1.46892801906806	Cluster 2
TR10436_c0_g1	-0.41697615338874	-0.611802618219946	-0.466078758346198	1.49485752995488	Cluster 2
TR1045_c4_g1	-1.17320506721845	-0.220670506553945	0.147642856902999	1.2462327168694	Cluster 2
TR104567_c0_g1	-0.565504714482424	-0.428789289003157	-0.503361339264576	1.49765534275016	Cluster 2
TR10475_c0_g1	-0.928471612170447	-0.800942848019732	0.842415616849233	0.886998843340946	Cluster 2
TR1051_c0_g2	-0.548163832701345	-0.635488627290527	-0.3012454480009	1.48489790799277	Cluster 2
TR10554_c0_g1	-0.677456155452167	-0.48545359213253	-0.321099397930921	1.48400914551562	Cluster 2
TR10569_c0_g1	-0.459626292072766	-0.743068800043687	-0.268524481235609	1.47121957335206	Cluster 2
TR1059_c0_g1	-0.886655045947258	-0.727307147714105	0.369699630783847	1.24426256287752	Cluster 2
TR106_c1_g1	-0.472109313116844	-0.836283386060825	-0.127403665456031	1.4357963646337	Cluster 2
TR106209_c1_g1	-0.774983353943655	-0.710578004833204	0.113879484918251	1.37168187385861	Cluster 2
TR10628_c0_g1	-1.10426911612204	-0.50317891104713	0.460608783208964	1.14683924396021	Cluster 2
TR1065_c2_g1	-0.73007230648859	-0.727570528911588	0.0672799469815089	1.39036288841867	Cluster 2
TR10667_c2_g1	-0.734231616839767	-0.130791494422918	-0.584755623213575	1.44977873447626	Cluster 2
TR1067_c2_g1	-1.49765626345788	0.443333515075926	0.478772935189606	0.575549813192344	Cluster 2
TR106778_c0_g1	-0.553517935400663	-0.515991295712482	-0.428429136440061	1.49793836755321	Cluster 2
TR10700_c1_g1	-0.873699998129871	-0.858315698823109	0.864725823534259	0.86728987341872	Cluster 2
TR10711_c0_g1	-0.379004882008902	-0.598810641282083	-0.516010025167525	1.49382554845851	Cluster 2
TR1073_c0_g1	-0.998093936694788	-0.639864154553393	0.463360568244132	1.17459752300405	Cluster 2
TR1078_c1_g1	-0.81154830441966	-0.560991034213758	-0.0501902043618318	1.42272954299525	Cluster 2
TR10803_c1_g1	-1.46035479469342	0.196167061973743	0.510034361131733	0.754153371587947	Cluster 2
TR10814_c0_g2	0.27601641374743	-0.518372289232978	-1.02462678469168	1.26698266017723	Cluster 2
TR108155_c0_g2	-0.658292150025263	-0.350261106239857	-0.47943541492406	1.48798867118918	Cluster 2
TR10820_c1_g1	-0.740670195586349	0.746411825009499	-0.976077001935499	0.970335372512348	Cluster 2
TR10821_c1_g1	-0.826967731505246	0.207189232601271	-0.710192683309135	1.32997118221311	Cluster 2
TR108310_c0_g1	-0.594006947634899	-0.534780448457225	-0.364068774356873	1.492856170449	Cluster 2
TR1088_c0_g2	-1.36526236477848	0.0675829426425534	0.268375994095028	1.0293034280409	Cluster 2
TR10886_c0_g1	-0.837396203893023	0.0886091312031703	-0.62824672303509	1.37703379572494	Cluster 2
TR10894_c0_g1	0.286609079264724	-0.655631391944397	-0.915469293475603	1.28449160615528	Cluster 2
TR10898_c0_g1	0.415316958113102	-1.34870970933636	-0.0685058899980373	1.0018986412213	Cluster 2
TR1091_c0_g1	-0.621123035318163	-0.697946613694766	-0.133277993867336	1.45234764288026	Cluster 2
TR1091_c1_g2	-0.774844717864087	-0.266924853594912	-0.424029195996489	1.46579876745549	Cluster 2
TR10910_c0_g1	-0.516055363985669	-0.46178135550339	-0.521616774731384	1.49945349422044	Cluster 2
TR1092_c2_g1	-0.576095426772579	-0.991728135030028	0.306651891024793	1.26117167077781	Cluster 2
TR10955_c0_g1	-1.18537595356068	-0.378971665153077	0.444777462575012	1.11957015613875	Cluster 2
TR10963_c1_g1	-1.26708123235792	-0.198593305733802	0.358027368083474	1.10764717000825	Cluster 2
TR1099_c0_g2	-0.698286595220373	-0.360132819581566	-0.425403919775213	1.48382333457715	Cluster 2
TR1100_c1_g1	-0.680081202943331	-0.891302415629551	0.281486333841917	1.28989728473096	Cluster 2
TR11041_c0_g1	-1.43571989515227	0.546208686537559	0.0949346799122806	0.794576528702434	Cluster 2
TR11042_c0_g1	-0.403133586637164	-0.742614501700038	-0.329799117121155	1.47554720545836	Cluster 2
TR11078_c0_g1	-0.965513101242785	0.816354210054541	-0.759154944857811	0.908313836046055	Cluster 2
TR1108_c1_g1	-0.530910822800527	-0.659792925472063	-0.291755584308026	1.48245933258062	Cluster 2
TR1108_c4_g1	-0.729926008788732	-0.628995995233088	-0.0782452580817298	1.43716726210355	Cluster 2
TR1108_c5_g2	-1.22366218189603	0.412285101716991	-0.302656529908054	1.11403361008709	Cluster 2
TR11084_c0_g1	-0.547216110279433	0.15200447507762	-0.942427745481246	1.33763938068306	Cluster 2
TR11096_c0_g1	-1.06146435965903	0.890871873285255	-0.644460504078695	0.815052990452467	Cluster 2
TR11113_c0_g1	-0.647575881358909	-0.680356963218778	-0.122181483842014	1.4501143284197	Cluster 2
TR11114_c0_g1	-0.00770896490357463	0.495943408796646	-1.39189644092323	0.903661997030156	Cluster 2
TR11117_c0_g1	-1.21025532959862	0.191342839477538	-0.190393247222066	1.20930573734315	Cluster 2
TR1112_c0_g1	-0.719277258008348	-0.0840306474046368	-0.635873704987327	1.43918161040031	Cluster 2
TR1114_c1_g1	-0.423313577007476	-0.465090090389863	-0.606956167084222	1.49535983448156	Cluster 2
TR1114_c1_g3	-1.37202035275631	0.667085324110735	-0.108016266429994	0.812951295075571	Cluster 2
TR11145_c0_g1	-1.04941748508861	-0.588084880109505	0.493042633615332	1.14445973158278	Cluster 2
TR11154_c0_g3	-1.19985327236636	-0.443378354587219	0.738963924312033	0.904267702641549	Cluster 2
TR11159_c0_g1	-0.258933577168321	-1.07457434524853	0	1.33350792241685	Cluster 2
TR11173_c0_g2	-0.638165479205132	-0.584049784509828	-0.25628086095759	1.47849612467255	Cluster 2
TR11190_c0_g1	-0.621507534953484	-1.0795959044016	0.876287021331931	0.824816418023153	Cluster 2
TR11196_c0_g1	-0.654316381207773	-0.554360822237745	-0.271476407564767	1.48015361101028	Cluster 2
TR11197_c0_g1	-1.06992082245773	-0.177424055985452	-0.0994650010827535	1.34680987952593	Cluster 2
TR11205_c0_g1	-0.848769557927131	-0.88149320353396	0.811955456619448	0.918307304841643	Cluster 2
TR11213_c0_g1	-0.914177366955502	-0.796913778000477	0.674863920108512	1.03622722484747	Cluster 2
TR11215_c0_g1	0.160183413917265	-1.41495348960251	0.323227245940196	0.931542829745048	Cluster 2
TR11228_c0_g1	-0.758089717290268	0.0512400328844381	-0.688893775446327	1.39574345985216	Cluster 2
TR11257_c1_g1	-0.0338652004367434	-0.139223601795502	-1.13093045902953	1.30401926126178	Cluster 2
TR11258_c0_g1	-0.0196680838580414	-0.676411057900465	-0.724298566424391	1.4203777081829	Cluster 2
TR11280_c1_g1	-0.620479110030696	-0.505964007037365	-0.365371207322781	1.49181432439084	Cluster 2
TR113_c2_g1	-0.243875758588668	-0.702385343432473	-0.526738042131777	1.47299914415292	Cluster 2
TR1130_c4_g1	-1.14176727362605	-0.369986136826878	0.299379955827074	1.21237345462586	Cluster 2
TR11303_c0_g1	-1.09709826751661	-0.290362638531099	0.0815454129208075	1.3059154931269	Cluster 2
TR11318_c0_g1	-1.04263366178785	-0.177716684960071	-0.1437161791397	1.36406652588763	Cluster 2
TR11332_c0_g2	-0.586507445351459	-0.440053289386195	-0.470449434963891	1.49701016970155	Cluster 2
TR11336_c0_g1	-0.674837410443083	-0.804305848479548	0.10563386384077	1.37350939508186	Cluster 2
TR1135_c1_g1	-0.216826267856232	-0.622540404909349	-0.632258108790861	1.47162478155644	Cluster 2
TR11355_c0_g1	-0.732268574803595	-0.488042458081187	-0.250372747176831	1.47068378006161	Cluster 2
TR1136_c0_g3	-1.23258593998838	-0.0209746463206566	0.0374650579106898	1.21609552839834	Cluster 2
TR11382_c0_g1	-0.830725571888168	-0.392090140052597	-0.227794507467664	1.45061021940843	Cluster 2
TR1140_c1_g1	-1.3670518636244	0.169764610515448	0.159553205371662	1.03773404773729	Cluster 2
TR11408_c0_g1	-0.609440263697059	-0.439958186356301	-0.445970854288567	1.49536930434193	Cluster 2
TR11423_c0_g1	-0.391445668518637	-0.415775255019241	-0.679925051311506	1.48714597484938	Cluster 2
TR114396_c0_g1	0.0968804742215137	-0.598958737094486	-0.868295785813044	1.37037404868602	Cluster 2
TR11456_c0_g1	-0.551929691315332	-0.467481432534844	-0.479545469503485	1.49895659335366	Cluster 2
TR11458_c0_g1	-0.25942556893833	-0.82654192894305	-0.368022318726467	1.45398981660785	Cluster 2
TR11460_c0_g1	-0.0084675719338855	-0.847698034714531	-0.550392175702553	1.40655778235097	Cluster 2
TR11467_c1_g1	0.347189613593683	0.356413206273203	-1.47093065504868	0.767327835181795	Cluster 2
TR11499_c2_g1	-0.518146575827205	0.12628662063172	-0.952721123295183	1.34458107849067	Cluster 2
TR11499_c2_g2	-0.586730142939471	-0.422536084966679	-0.487309887653193	1.49657611555934	Cluster 2
TR11518_c0_g1	-1.45982189227368	0.325907434958738	0.322188574186387	0.811725883128559	Cluster 2
TR11525_c0_g1	-0.966158391617928	-0.667323989460729	0.437871614861052	1.19561076621761	Cluster 2
TR11574_c0_g1	0.557267811780321	-0.863691144006891	-0.820580551059153	1.12700388328572	Cluster 2
TR11580_c0_g1	-0.244230180924508	-1.27082483972583	0.459483899705431	1.05557112094491	Cluster 2
TR1159_c0_g1	-0.938834458531566	-0.775079685051846	0.700287841395244	1.01362630218817	Cluster 2
TR11597_c0_g1	-0.666303838519613	-0.406937243659629	-0.415880919344456	1.4891220015237	Cluster 2
TR1160_c1_g2	-0.635101014892604	-0.380842361164122	-0.475780141740851	1.49172351779758	Cluster 2
TR1160_c5_g1	-0.572486573422895	0.414821254155868	-1.03645951596472	1.19412483523175	Cluster 2
TR11601_c0_g2	-0.241021089408758	-0.391335317212068	-0.821545003683613	1.45390141030444	Cluster 2
TR11604_c0_g2	-0.493120816909467	-0.255546165562861	-0.723682194415582	1.47234917688791	Cluster 2
TR116089_c0_g1	-0.544127453365711	-0.36030061101243	-0.588245895530498	1.49267395990864	Cluster 2
TR11623_c0_g1	-0.27850541210039	-0.762862650535851	-0.427538408542071	1.46890647117831	Cluster 2
TR1165_c0_g1	-0.867965560998223	-0.23462542110816	-0.338573392485192	1.44116437459158	Cluster 2
TR11673_c0_g1	-1.1308978326578	-0.54996726412172	0.785878154897793	0.894986941881726	Cluster 2
TR11729_c0_g2	-0.427286007381339	-0.602305813186084	-0.466179297560171	1.49577111812759	Cluster 2
TR11740_c0_g1	-0.504021801059969	-0.49982243957226	-0.496147998270514	1.49999223890274	Cluster 2
TR11784_c0_g1	-0.629124352622592	-0.743787195137468	-0.0580373752826336	1.43094892304269	Cluster 2
TR1180_c0_g1	-0.0205576972591482	-0.357189989877703	-0.994478604911305	1.37222629204816	Cluster 2
TR11809_c0_g1	-1.39799359514715	0.640883207391333	-0.0387423934548294	0.79585278121065	Cluster 2
TR11829_c0_g1	-0.834437744343709	0.187478396482402	-0.691233907030597	1.3381932548919	Cluster 2
TR11845_c0_g1	-0.21514804958251	-0.578850704829134	-0.676179584402174	1.47017833881382	Cluster 2
TR118567_c0_g1	-0.51142238263543	-0.503493353447284	-0.48499228534161	1.49990802142432	Cluster 2
TR118832_c0_g1	0.101445724149388	-0.710120069045718	-0.76808905427394	1.37676339917027	Cluster 2
TR11908_c0_g1	-0.594285206987552	-0.445049989886809	-0.457227169059959	1.49656236593432	Cluster 2
TR11923_c0_g1	-0.71423841069259	-0.465930492280388	-0.297714216366323	1.4778831193393	Cluster 2
TR1193_c4_g1	-0.647070044728655	-0.483240442195158	-0.359230534721886	1.4895410216457	Cluster 2
TR11936_c0_g1	-0.915726702625888	-0.121029335745247	-0.378662939867439	1.41541897823857	Cluster 2
TR1195_c0_g1	-0.863306480490591	-0.868110968729843	0.832677867965359	0.898739581255074	Cluster 2
TR1195_c1_g1	-0.698818499715843	-0.519283262378774	-0.257006751694056	1.47510851378867	Cluster 2
TR11977_c0_g1	-0.77610239593157	0.371651609134877	-0.841266325061005	1.2457171118577	Cluster 2
TR11994_c0_g1	-0.390223831950403	-0.473323240021502	-0.629083122257249	1.49263019422915	Cluster 2
TR1200_c0_g1	-0.96559949963981	-0.460904911050209	0.0660556152712858	1.36044879541873	Cluster 2
TR1200_c0_g4	-1.02129755580986	-0.286130399071473	-0.0605677487085599	1.36799570358989	Cluster 2
TR1200_c3_g1	-0.920964919102086	-0.197534259244259	-0.303097101035408	1.42159627938175	Cluster 2
TR12072_c1_g1	-0.516466775807191	-0.605877880502741	-0.370585499724978	1.49293015603491	Cluster 2
TR12076_c0_g1	-0.259161160219908	-0.629608908161687	-0.590378706614661	1.47914877499625	Cluster 2
TR12083_c0_g2	-0.371768298212885	-0.849100434189923	-0.224896871758412	1.44576560416122	Cluster 2
TR12087_c0_g1	-1.49655133252878	0.543117857597253	0.550335370655025	0.4030981042765	Cluster 2
TR12095_c0_g1	0.743498070450375	-0.128550018104526	-1.3661536185284	0.751205566182552	Cluster 2
TR1212_c1_g1	-0.193641648449207	0.00877457500731948	-1.12110220675714	1.30596928019903	Cluster 2
TR12142_c0_g1	-0.663306584181956	-0.610940274904433	-0.19200980068425	1.46625665977064	Cluster 2
TR12156_c1_g2	-0.530119010063554	-0.509891893622337	-0.459324102519296	1.49933500620519	Cluster 2
TR1218_c0_g1	-0.579796641254259	-0.517430872454601	-0.398525894570132	1.49575340827899	Cluster 2
TR12181_c1_g1	-0.268778374157187	-0.569323681709505	-0.642179673423849	1.48028172929054	Cluster 2
TR1223_c5_g1	0.871294862743659	-1.08894528987294	-0.609282565116687	0.82693299224597	Cluster 2
TR1225_c0_g1	-1.05553651750891	-0.248394421970724	-0.0458973118558549	1.34982825133548	Cluster 2
TR12273_c0_g1	-0.307936858272192	0.257653243270202	-1.16597646466617	1.21626007966816	Cluster 2
TR12286_c0_g1	-0.563266143904144	-0.561158506321715	-0.369363486320678	1.49378813654654	Cluster 2
TR1229_c0_g1	-0.718980554013597	0.0660480823897003	-0.737851434696368	1.39078390632026	Cluster 2
TR12301_c0_g1	-0.631398382396414	-0.501213148912617	-0.358009392080441	1.49062092338947	Cluster 2
TR12389_c0_g1	-0.707156278872182	-0.687218833124244	-0.0292831234422841	1.42365823543871	Cluster 2
TR124238_c0_g1	-0.40992252916585	-0.661538807701132	-0.418291141533986	1.48975247840097	Cluster 2
TR12437_c0_g1	-1.29190621278253	0.0362684222368765	0.107554631461082	1.14808315908457	Cluster 2
TR12470_c0_g1	-0.484966514774508	-0.554279182025835	-0.459551870115688	1.49879756691603	Cluster 2
TR12470_c0_g2	-0.73143411781194	-0.670801026539859	-0.0171784719681861	1.41941361631999	Cluster 2
TR125160_c0_g1	-0.157792577217068	-0.564878752759327	-0.732941852753837	1.45561318273023	Cluster 2
TR12528_c0_g1	-0.342230280629577	-0.504396827810967	-0.642067491401724	1.48869459984227	Cluster 2
TR12528_c0_g2	0.145114834992061	-0.881851689567143	-0.613947378812568	1.35068423338765	Cluster 2
TR125316_c0_g1	0.517537017470006	-0.80948097604283	-0.862561695783343	1.15450565435617	Cluster 2
TR12538_c0_g1	-0.566338723591481	-0.378978544358209	-0.54930598002482	1.49462324797451	Cluster 2
TR12551_c0_g1	-0.792758708342978	-0.924124938494173	0.710654814498481	1.00622883233867	Cluster 2
TR12556_c0_g2	0.00880854337170893	-0.9726465334833	-0.409537480290985	1.37337547040258	Cluster 2
TR12590_c1_g1	-0.751728092175608	-0.620089071425962	-0.0588911408616835	1.43070830446325	Cluster 2
TR1261_c2_g1	-0.0229952722267752	-0.729797323828703	-0.668476597890637	1.42126919394611	Cluster 2
TR1261_c6_g1	-0.276335210016026	-0.695643854779473	-0.505813580072812	1.47779264486831	Cluster 2
TR12621_c0_g1	0.0853596089531771	0.0807765427006574	-1.30216369899713	1.13602754734329	Cluster 2
TR12712_c0_g2	0.220369759586344	-1.18309210934828	-0.256308489837637	1.21903083959957	Cluster 2
TR12727_c0_g1	-1.29601583471552	0.767956808960676	-0.279644161488454	0.807703187243299	Cluster 2
TR1276_c1_g2	-0.534934552229888	-0.448842822114097	-0.515205197411686	1.49898257175567	Cluster 2
TR12763_c0_g1	-1.02871622687958	-0.685932372478016	0.832527169785918	0.882121429571676	Cluster 2
TR127871_c0_g1	-0.566553040310296	-0.175253150540343	-0.718400758728487	1.46020694957913	Cluster 2
TR1290_c2_g1	-0.815966046258532	-0.255793427634696	-0.384564435394155	1.45632390928738	Cluster 2
TR12902_c0_g1	0.326355103506072	-0.557855522336833	-1.01462436139167	1.24612478022243	Cluster 2
TR12919_c0_g1	-0.271093514094036	0.548799065117194	-1.2761231273207	0.998417576297546	Cluster 2
TR12938_c1_g3	-0.898020097716767	-0.811060982109184	0.660554820480676	1.04852625934528	Cluster 2
TR12939_c0_g1	-0.758590824916425	-0.547319735360262	-0.144628531105561	1.45053909138225	Cluster 2
TR12963_c0_g1	-0.368130406372908	-0.528187104795911	-0.596782832691484	1.4931003438603	Cluster 2
TR12967_c0_g1	-0.403883113594649	-0.145494514762796	-0.879607917051425	1.42898554540887	Cluster 2
TR12972_c0_g1	-0.593309975041122	-0.569647172517488	-0.326059499480077	1.48901664703869	Cluster 2
TR1299_c0_g2	-0.850814375224506	-0.563515188462856	0.01492151754891	1.39940804613845	Cluster 2
TR1299_c1_g1	-0.165085945276372	-0.300823448476622	-0.944694678346282	1.41060407209927	Cluster 2
TR1299_c4_g1	-0.490912160645918	-0.489384326650521	-0.519559048059607	1.49985553535604	Cluster 2
TR1300_c1_g1	-0.867747902096917	0.463885295148743	-0.785558318928517	1.18942092587669	Cluster 2
TR1300_c3_g1	-0.730137389997589	-0.804465742394214	0.200631082551187	1.33397204984062	Cluster 2
TR1302_c0_g3	-0.511593551570919	-0.554602255406782	-0.431863657113526	1.49805946409123	Cluster 2
TR13029_c0_g1	-0.644418857700743	-0.40621143622158	-0.441071058877067	1.49170135279939	Cluster 2
TR1305_c3_g1	-0.956611686350931	-0.520476445125497	0.137252257407146	1.33983587406928	Cluster 2
TR13098_c0_g1	-0.454543875864045	-0.318110241186092	-0.707679007973138	1.48033312502327	Cluster 2
TR131_c0_g1	-0.986299554780173	0.923287455449333	-0.734251157456815	0.797263256787654	Cluster 2
TR1310_c0_g1	-0.392556091720608	0.248404346564188	-1.10559240258361	1.24974414774003	Cluster 2
TR13125_c0_g1	-1.01416780612378	-0.587217876580362	0.385710447712521	1.21567523499162	Cluster 2
TR13138_c0_g1	0.115249908312431	-0.133307497633273	-1.20932737892813	1.22738496824898	Cluster 2
TR13140_c1_g1	-0.863595151488613	-0.628976019513778	0.136077329678547	1.35649384132384	Cluster 2
TR13143_c0_g1	0.526762341122144	-1.05430739003199	-0.59407521086435	1.12162025977419	Cluster 2
TR1316_c3_g1	-0.751055834914623	-0.571345762475586	-0.124644656897724	1.44704625428793	Cluster 2
TR1316_c3_g3	0.632804978584377	-0.821873237853969	-0.881736538941967	1.07080479821156	Cluster 2
TR1317_c0_g1	-0.607975965695978	-0.723149222797919	-0.115933820646091	1.44705900913999	Cluster 2
TR1317_c3_g1	-0.862522699906764	-0.790694263938798	0.463088187890616	1.19012877595494	Cluster 2
TR1318_c0_g1	-0.720037647468875	-0.577068226623941	-0.159932135093315	1.45703800918613	Cluster 2
TR1319_c0_g1	-1.16969722590612	0.110134258978162	-0.197659924576653	1.25722289150461	Cluster 2
TR13221_c0_g1	0.74393739847061	-0.857532629973607	-0.866442059895411	0.980037291398408	Cluster 2
TR13222_c0_g1	-0.873254166422618	-0.547043795754777	0.028405959243548	1.39189200293385	Cluster 2
TR13240_c0_g1	-0.849774452523458	-0.281471033170231	-0.317213386588672	1.44845887228236	Cluster 2
TR1325_c3_g1	-0.802714167706683	-0.402974734437614	-0.253431924869329	1.45912082701363	Cluster 2
TR13279_c0_g1	-0.530858190258764	-0.602630592250079	-0.358627842250242	1.49211662475908	Cluster 2
TR13287_c0_g1	-0.986000256932147	-0.674514654892657	0.518665906389226	1.14184900543558	Cluster 2
TR13310_c0_g1	-0.906709461640771	-0.746135423987003	0.469202781212029	1.18364210441575	Cluster 2
TR13364_c1_g1	-0.557480626946896	-0.548807260522207	-0.389217318307926	1.49550520577703	Cluster 2
TR1337_c0_g1	-0.879866332836833	-0.491129829078395	-0.0372783330656124	1.40827449498084	Cluster 2
TR1337_c1_g2	-1.06254212776661	-0.581764667660825	0.521585868331151	1.12272092709628	Cluster 2
TR13371_c0_g1	-0.674814782662611	-0.597237650167539	-0.194297064719392	1.46634949754954	Cluster 2
TR13394_c0_g5	-0.5005455464587	-0.603979312516586	-0.389723654253822	1.49424851322911	Cluster 2
TR13396_c0_g1	-0.920159598920515	-0.727892254755146	0.459717182926836	1.18833467074883	Cluster 2
TR13506_c1_g1	0.213733496618749	-1.41327743799446	0.255162015787141	0.944381925588571	Cluster 2
TR1351_c1_g1	-0.604686372456457	-0.352119986793632	-0.53466806696011	1.4914744262102	Cluster 2
TR13515_c0_g1	0.196242038939035	-1.0816910588676	-0.393763246034786	1.27921226596335	Cluster 2
TR13515_c0_g2	0.147174387060803	-1.16716283406632	-0.230236282000492	1.25022472900601	Cluster 2
TR13550_c0_g1	-0.358342290706466	-1.0750268721194	0.129899080381094	1.30347008244477	Cluster 2
TR13554_c0_g1	-0.808014324338786	-0.393196408760288	-0.25702387244163	1.4582346055407	Cluster 2
TR13586_c0_g1	-0.692406299411794	-0.530202773927333	-0.252429236535193	1.47503830987432	Cluster 2
TR1359_c1_g1	-1.48085111477768	0.342264078792983	0.424820238501843	0.713766797482854	Cluster 2
TR13599_c0_g2	-0.576744226110002	-0.508891964214707	-0.41088314147706	1.49651933180177	Cluster 2
TR13607_c0_g1	-1.40998680070481	0.525345335897122	0.0271977149374535	0.857443749870235	Cluster 2
TR1363_c0_g1	0.234758222837619	-0.907020406418074	-0.637581991570352	1.30984417515081	Cluster 2
TR13655_c0_g1	0.401280061672141	-0.863536410220167	-0.765475737629305	1.22773208617733	Cluster 2
TR13678_c0_g1	-0.80850200476599	-0.506702258211133	-0.124924610270631	1.44012887324775	Cluster 2
TR1369_c1_g1	-1.26343463216453	-0.26662251765783	0.480328801058261	1.0497283487641	Cluster 2
TR1369_c1_g2	-1.29135209183278	-0.273930743685993	0.65552622394311	0.909756611575662	Cluster 2
TR1372_c0_g2	-0.504066302544529	-0.624716533550048	-0.362585137701949	1.49136797379653	Cluster 2
TR13746_c0_g1	-0.562760641663921	-0.540873985692549	-0.392044725087214	1.49567935244368	Cluster 2
TR13760_c0_g1	-0.469176010414228	-0.400852081710336	-0.623455849423018	1.49348394154758	Cluster 2
TR13787_c0_g1	-1.27202012373022	0.64593578912111	-0.306934027454712	0.933018362063826	Cluster 2
TR13795_c0_g1	-0.323775529897618	-0.984277610888757	-0.0777061271754283	1.3857592679618	Cluster 2
TR13816_c2_g1	-0.690716891430203	0.475941738622305	-0.958756282134462	1.17353143494236	Cluster 2
TR13817_c0_g1	-1.37658637110198	-0.0671821876984006	0.5512052079502	0.892563350850183	Cluster 2
TR13824_c0_g1	-0.099141767054334	-0.511260485005681	-0.822293479685943	1.43269573174596	Cluster 2
TR13875_c0_g1	-0.455173634141189	-0.523431131029517	-0.520648896102004	1.49925366127271	Cluster 2
TR13950_c0_g2	-1.16730256027461	-0.0739520800288897	-0.0357183515785794	1.27697299188208	Cluster 2
TR1397_c0_g1	-1.19189659998689	-0.202976658838935	0.165766023298291	1.22910723552754	Cluster 2
TR1397_c2_g1	0.245093578771214	-0.992381781479987	-0.541748630886228	1.289036833595	Cluster 2
TR13986_c0_g1	-0.502135677947706	-0.495031876000699	-0.502823142652255	1.49999069660066	Cluster 2
TR140_c4_g1	-0.552330905162892	-0.633159818113559	-0.299259427710208	1.48475015098666	Cluster 2
TR140_c6_g1	-0.754058803640295	-0.441986362569014	-0.273981246058169	1.47002641226748	Cluster 2
TR14064_c0_g1	-0.329497653200144	-0.88109131006638	-0.226073842537724	1.43666280580425	Cluster 2
TR14085_c0_g2	-0.525891402832485	-0.569837759615144	-0.400400139575337	1.49612930202297	Cluster 2
TR14097_c0_g2	-0.466533624616747	-0.480727601986992	-0.551697488838218	1.49895871544196	Cluster 2
TR141_c0_g1	-0.538358574449218	0.0719588193570735	-0.906148095607594	1.37254785069974	Cluster 2
TR1413_c0_g2	-0.717583128337242	-0.13213958515211	-0.601442506409827	1.45116521989918	Cluster 2
TR1417_c0_g1	-0.625554935152186	-0.580514420962581	-0.275709421291705	1.48177877740647	Cluster 2
TR1417_c1_g1	-0.785945974284484	-0.657102371942765	0.0472426541919635	1.39580569203529	Cluster 2
TR14179_c1_g1	-0.712397204057071	-0.653761201686654	-0.0692146625918835	1.43537306833561	Cluster 2
TR1418_c0_g1	-0.762431527570219	-0.670690350771467	0.0302834952539573	1.40283838308773	Cluster 2
TR14207_c0_g1	-1.28588988109544	0.0201337219639542	0.110856758283459	1.15489940084802	Cluster 2
TR14224_c1_g2	-0.508063856335816	-0.508063856335816	-0.483773950853625	1.49990166352526	Cluster 2
TR14248_c0_g1	0.103764961367726	-1.40634639130301	0.365753090778439	0.936828339156845	Cluster 2
TR14250_c0_g1	-0.604195566303237	-0.35333218446258	-0.534072337521006	1.49160008828682	Cluster 2
TR14255_c0_g1	0.774548842327959	-0.346393720783254	-1.26012418425476	0.831969062710049	Cluster 2
TR14263_c0_g1	-0.132161955892719	-1.24752962305414	0.202799266793839	1.17689231215302	Cluster 2
TR14268_c0_g1	-0.775202552143669	0.713211521994571	-0.94072174939456	1.00271277954366	Cluster 2
TR14333_c0_g1	-0.941338438605647	-0.363554421432137	-0.0993306109220492	1.40422347095983	Cluster 2
TR14336_c1_g1	-1.3212916270534	-0.22753011409923	0.813102539725168	0.73571920142746	Cluster 2
TR14349_c0_g1	0.0261861605391699	-0.574492297543017	-0.848110954605366	1.39641709160921	Cluster 2
TR1437_c1_g1	-0.794101803483566	-0.302426621420143	-0.367364853013425	1.46389327791713	Cluster 2
TR14370_c0_g1	-0.524370493885099	0.0282900104439823	-0.892395494615819	1.38847597805694	Cluster 2
TR1441_c1_g2	-0.891884524103358	-0.758518613957061	0.459636083182772	1.19076705487765	Cluster 2
TR14413_c0_g1	-1.18423600865175	0.051279550226915	-0.123869623394443	1.25682608181928	Cluster 2
TR14424_c0_g1	-0.330836688915832	-1.23827446422783	0.53338976376226	1.0357213893814	Cluster 2
TR14456_c0_g1	0.129771865506347	-1.42749052056982	0.421490439206565	0.876228215856905	Cluster 2
TR1447_c0_g1	-0.824714430681193	-0.496750153508	-0.113848584632559	1.43531316882175	Cluster 2
TR14476_c0_g2	-1.10559548883662	-0.304172168275806	0.116914661171402	1.29285299594102	Cluster 2
TR14486_c0_g1	-0.879993319404267	-0.615093833184858	0.143545009548214	1.35154214304091	Cluster 2
TR145_c0_g1	-1.41943181423455	0.750686375437638	0.0196720207058076	0.649073418091103	Cluster 2
TR1451_c0_g2	-1.3383412614316	0.702959707568629	-0.188686285142833	0.824067839005805	Cluster 2
TR14512_c0_g1	-0.78953872867359	-0.511675313432241	-0.145708864089976	1.44692290619581	Cluster 2
TR14532_c0_g1	-0.39736254374776	0.275256345408605	-1.11344296112654	1.23554915946569	Cluster 2
TR14535_c0_g1	-0.499240050515182	-0.622935366978177	-0.369791463519024	1.49196688101238	Cluster 2
TR145403_c0_g1	-0.810119161886605	-0.736333501852646	0.222880078588815	1.32357258515044	Cluster 2
TR145591_c0_g1	-1.06654723028162	0.28246287285834	-0.466822650949368	1.25090700837265	Cluster 2
TR14586_c1_g1	-0.655847082064245	-0.978492239351561	0.445091017331503	1.1892483040843	Cluster 2
TR14620_c0_g1	-0.551801407704206	-0.402697802504598	-0.542018591978439	1.49651780218724	Cluster 2
TR14626_c1_g1	-0.234455749472488	-0.707143496483196	-0.529618791219102	1.47121803717479	Cluster 2
TR14633_c0_g1	-0.222055975070152	-0.251663438412838	-0.941094370535404	1.41481378401839	Cluster 2
TR14665_c0_g1	-0.672085342531668	-0.65937450863036	-0.1175752135871	1.44903506474913	Cluster 2
TR1468_c9_g1	-1.3895823649727	0.635012922257334	-0.0592538895252506	0.813823332240614	Cluster 2
TR1471_c0_g1	-0.774658849169195	-0.222966284954426	-0.463622300620127	1.46124743474375	Cluster 2
TR147122_c0_g1	-1.06202769406682	-0.459320902010594	0.258742673901559	1.26260592217586	Cluster 2
TR14739_c0_g1	-0.729930772932202	-0.960564361690612	0.604799783286681	1.08569535133613	Cluster 2
TR1477_c1_g3	-1.26787021059737	-0.32648715656651	0.710797092481732	0.883560274682152	Cluster 2
TR1477_c3_g1	0.116614704377019	-1.18511544251719	-0.176754372449724	1.24525511058989	Cluster 2
TR1482_c0_g1	-0.74471067676804	-0.466502325631347	-0.258761221328619	1.46997422372801	Cluster 2
TR14833_c0_g1	-0.829652780200171	-0.710264591677744	0.212496706065315	1.3274206658126	Cluster 2
TR1484_c0_g2	-0.849824392590528	-0.811354975641985	0.484364931579375	1.17681443665314	Cluster 2
TR1485_c1_g1	-0.815288214626149	-0.535043021169168	-0.0789354593484958	1.42926669514381	Cluster 2
TR1485_c2_g1	-1.00143974413293	-0.718514894287963	0.830542591043348	0.889412047377549	Cluster 2
TR14944_c0_g1	-0.661848381890331	-0.550809801264138	-0.266395191239155	1.47905337439362	Cluster 2
TR14994_c0_g1	-0.926156825908926	-0.771940872309012	0.620386513847371	1.07771118437057	Cluster 2
TR15009_c0_g1	-0.484034764980262	-0.453138928917692	-0.561274355136687	1.49844804903464	Cluster 2
TR15017_c0_g1	-0.502649727490032	-0.475128144269546	-0.521945302441665	1.49972317420124	Cluster 2
TR1504_c1_g1	-0.405414207659502	-0.640818074776086	-0.445824135802131	1.49205641823772	Cluster 2
TR1509_c1_g1	-0.272735973912957	-0.335141662859142	-0.842476800773499	1.4503544375456	Cluster 2
TR152_c1_g1	0.610570665621611	-0.94294926151414	-0.75109266170098	1.08347125759351	Cluster 2
TR152_c1_g2	-0.630470741610279	-0.673440056746958	-0.153927175675105	1.45783797403234	Cluster 2
TR152_c4_g2	-0.618523368669209	-0.617915056258856	-0.239457835246646	1.47589626017471	Cluster 2
TR1521_c0_g1	-0.951069590877587	-0.451576553836534	0.027588278208663	1.37505786650546	Cluster 2
TR15245_c0_g1	-0.607602135075347	-0.20429273677096	-0.656948956414629	1.46884382826094	Cluster 2
TR15264_c0_g1	-1.10836615189325	0.290680248790766	-0.413569459661659	1.23125536276414	Cluster 2
TR15277_c0_g1	-1.46552184091934	0.21118873690104	0.524772012905614	0.729561091112683	Cluster 2
TR1528_c4_g1	-0.452736078523453	-0.309712635535362	-0.716146160573461	1.47859487463228	Cluster 2
TR1528_c5_g1	-0.264893078600842	-0.622986317023224	-0.592292610872734	1.4801720064968	Cluster 2
TR1528_c7_g1	-0.782453872280335	-0.513647023160684	-0.153196676383587	1.44929757182461	Cluster 2
TR1530_c0_g1	-1.49241291590548	0.409371945852942	0.445007721671082	0.638033248381456	Cluster 2
TR1530_c3_g1	-1.47456389892858	0.244473944848544	0.683357313782388	0.546732640297652	Cluster 2
TR15322_c0_g1	0.555836783727768	-0.629758811231205	-1.03348680759613	1.10740883509957	Cluster 2
TR15332_c0_g1	0.593148662204201	-1.08323457545524	-0.577965371971505	1.06805128522254	Cluster 2
TR1534_c0_g1	-0.703203992620291	0.181973464930349	-0.820252251469963	1.3414827791599	Cluster 2
TR15350_c0_g1	-0.62390240668296	-0.470244913741934	-0.399244554934701	1.49339187535959	Cluster 2
TR15363_c0_g1	-1.3964508527031	0.132373665233226	0.29038331366696	0.973693873802909	Cluster 2
TR15368_c0_g1	-0.838163596180038	-0.0882992443301499	-0.501268017812697	1.42773085832288	Cluster 2
TR15419_c0_g1	0.144439850726668	0.52499993647358	-1.4481464475051	0.778706660304855	Cluster 2
TR1542_c0_g2	-0.687024601870829	-0.687669392675025	-0.057708776975541	1.4324027715214	Cluster 2
TR1542_c3_g1	-0.327575840687974	-1.21746101218258	0.443190843283729	1.10184600958682	Cluster 2
TR15420_c0_g2	-0.826240204170882	-0.521947136650148	-0.0795951773838957	1.42778251820493	Cluster 2
TR1545_c1_g1	-0.709926654864635	-0.595911262938291	-0.149666730489415	1.45550464829234	Cluster 2
TR15476_c0_g1	-0.517309439393857	-0.46492367337929	-0.517309439393857	1.499542552167	Cluster 2
TR155_c2_g1	-0.664388455244361	-0.507424991276243	-0.312573794626165	1.48438724114677	Cluster 2
TR15506_c0_g1	-0.620357713589628	-0.644865672645021	-0.203722409647952	1.4689457958826	Cluster 2
TR1552_c0_g1	-1.22012241827801	-0.0955479980851628	0.0936200266104476	1.22205038975273	Cluster 2
TR1555_c2_g1	-0.911248787381556	-0.751029220369414	0.496477480750486	1.16580052700048	Cluster 2
TR15560_c1_g2	-0.673401944766526	-0.727221593373598	-0.0196901153440508	1.42031365348417	Cluster 2
TR15566_c0_g1	-0.398329964880644	-0.548942289910142	-0.548942289910142	1.49621454470093	Cluster 2
TR1561_c1_g2	0.336401411934895	-0.127438391607815	-1.29795559334686	1.08899257301978	Cluster 2
TR15689_c0_g1	-0.743381023874566	-0.0409071151657731	-0.641818531049198	1.42610667008954	Cluster 2
TR15699_c0_g1	-0.561241039299129	-0.203749116636556	-0.701684294630854	1.46667445056654	Cluster 2
TR15739_c0_g1	-1.21436376534043	0.768725686316418	-0.42335617507281	0.86899425409682	Cluster 2
TR1579_c3_g1	0.750332768371962	-0.304603943585248	-1.28231712054901	0.836588295762299	Cluster 2
TR1581_c1_g1	-0.88152960833082	-0.342780722966301	-0.211233877252296	1.43554420854942	Cluster 2
TR15837_c0_g1	-0.556456165326587	-0.963796626219253	0.209731844447712	1.31052094709813	Cluster 2
TR15842_c0_g1	-0.599876410903234	-0.449733070215752	-0.446547004630872	1.49615648574986	Cluster 2
TR159_c1_g1	-0.380785887145778	-0.625124093430318	-0.486563713792937	1.49247369436903	Cluster 2
TR15905_c0_g1	-0.548671398016198	-0.522348332444207	-0.426927219745737	1.49794695020614	Cluster 2
TR15906_c0_g1	-0.445224641579349	-0.509594469277569	-0.543925044049952	1.49874415490687	Cluster 2
TR15911_c0_g1	-0.664644164313598	-0.509864016459746	-0.309560295707703	1.48406847648105	Cluster 2
TR15961_c0_g1	-1.32785158498022	0.366526458486963	-0.0851976333041123	1.04652275979737	Cluster 2
TR15961_c1_g1	-0.918882459628346	-0.721406041172288	0.43938503106473	1.2009034697359	Cluster 2
TR15961_c1_g2	-0.842400721945707	-0.842400721945707	0.558284465229016	1.1265169786624	Cluster 2
TR1599_c0_g1	-0.772145806078516	-0.947675928862992	0.74413568010227	0.975686054839237	Cluster 2
TR1601_c1_g1	-0.77984949454655	-0.676401304970872	0.067072132259931	1.38917866725749	Cluster 2
TR1602_c1_g1	-0.550767229506012	-0.40216467642384	-0.543553513336975	1.49648541926683	Cluster 2
TR1602_c1_g2	-0.501831079870067	-0.361408392049922	-0.627851440734299	1.49109091265429	Cluster 2
TR1603_c1_g1	-0.0739223059789356	-0.84820130468614	-0.500690258022277	1.42281386868735	Cluster 2
TR16161_c0_g1	-0.695768076051431	-0.600725650152466	-0.162489680589513	1.45898340679341	Cluster 2
TR16194_c0_g1	0.312884171219702	-0.63441155158912	-0.945567080978879	1.2670944613483	Cluster 2
TR16197_c1_g1	-0.361705448605767	-0.628411586892563	-0.500959096029846	1.49107613152818	Cluster 2
TR162_c2_g1	-0.762572220621093	-0.78689238357499	0.227528635635351	1.32193596856073	Cluster 2
TR16231_c0_g1	-0.602835259380794	-0.669000104922588	-0.194818711873061	1.46665407617644	Cluster 2
TR162956_c0_g1	-0.524887294308297	-0.412796373141844	-0.55937680851336	1.4970604759635	Cluster 2
TR16324_c0_g2	-0.57512764636223	-0.562510586478598	-0.354679572284325	1.49231780512515	Cluster 2
TR16325_c0_g2	-0.465945260522181	-0.543041742217875	-0.490235932837262	1.49922293557732	Cluster 2
TR1634_c1_g1	-0.619210577103216	-0.392047640689262	-0.482185478237166	1.49344369602964	Cluster 2
TR163764_c0_g1	-0.632830310966258	-0.403512010128311	-0.456431618013991	1.49277393910856	Cluster 2
TR16390_c0_g1	-0.81715510735698	-0.481603480450474	-0.143378135401286	1.44213672320874	Cluster 2
TR16440_c0_g1	-0.344921258418432	-0.548301123940057	-0.597771902039912	1.4909942843984	Cluster 2
TR16452_c0_g1	-0.958061355057775	-0.690094741848692	0.472170086528052	1.17598601037841	Cluster 2
TR1646_c5_g1	-1.08168273826509	-0.501504385122558	0.3883473145867	1.19483980880095	Cluster 2
TR1649_c0_g1	-0.435796929022239	-0.517887007209543	-0.544705279764758	1.49838921599654	Cluster 2
TR16530_c0_g2	-0.249865631510396	-0.709741026928304	-0.51352752488333	1.47313418332203	Cluster 2
TR16538_c0_g1	0.304432668968939	-0.890103136890137	-0.692946741748348	1.27861720966955	Cluster 2
TR16547_c0_g1	-1.31177589935072	-0.248626319149434	0.779363983596374	0.781038234903778	Cluster 2
TR1657_c3_g1	-0.460521485723885	-0.718721816631836	-0.298086501428807	1.47732980378453	Cluster 2
TR1658_c2_g1	-0.606244885255693	-0.768015920693445	-0.0539236784792506	1.42818448442839	Cluster 2
TR16630_c0_g1	0.00334842697146719	-0.526920644328149	-0.875157049360733	1.39872926671742	Cluster 2
TR1669_c1_g1	-0.310035831712759	-0.580811691257544	-0.596144985108555	1.48699250807886	Cluster 2
TR16697_c0_g1	-1.03550030682739	-0.610258826357931	0.50581355045315	1.13994558273217	Cluster 2
TR1673_c4_g1	-0.78299290061282	-0.478366452014417	-0.194721422227861	1.4560807748551	Cluster 2
TR1674_c0_g2	-0.742236200107247	-0.213003766035192	-0.509160925349508	1.46440089149195	Cluster 2
TR1679_c0_g1	-0.900545485300107	-0.588867749894411	0.139282506145796	1.35013072904872	Cluster 2
TR1681_c0_g1	0.874263451626858	-0.776541389169564	-0.951045072129017	0.853323009671724	Cluster 2
TR1684_c2_g1	-0.518517752297407	-0.54450861707422	-0.435346985011608	1.49837335438323	Cluster 2
TR1685_c1_g1	-0.0768410937752632	-0.85016986152951	-0.496086101413098	1.42309705671787	Cluster 2
TR1689_c0_g1	-1.46954141057814	0.395281145307314	0.305631428545419	0.768628836725403	Cluster 2
TR1689_c2_g1	0.193914556380615	-0.749708589023838	-0.781791775967589	1.33758580861081	Cluster 2
TR169_c8_g2	-1.08301086747946	-0.494453155083932	0.377388379321746	1.20007564324164	Cluster 2
TR16901_c0_g2	-0.575741009044474	-0.419110846335481	-0.502074768135678	1.49692662351563	Cluster 2
TR16910_c0_g1	-0.63741734287594	-0.643546355788208	-0.18387038736806	1.46483408603221	Cluster 2
TR16940_c0_g1	-1.37040769062548	-0.118045018895462	0.731929998625527	0.756522710895415	Cluster 2
TR16954_c0_g1	-0.976525245445916	-0.401875963954161	0.00549774249858818	1.37290346690149	Cluster 2
TR16960_c1_g1	0.32811234010823	-0.805993676301899	-0.79269182467589	1.27057316086956	Cluster 2
TR16963_c0_g1	-0.309646498780878	-0.625485927537374	-0.551170767829963	1.48630319414821	Cluster 2
TR16971_c0_g1	-0.364689410702548	-0.537358682708652	-0.590945698158822	1.49299379157002	Cluster 2
TR1701_c0_g1	-0.625378264961254	-1.03795860294656	0.55945602037529	1.10388084753252	Cluster 2
TR17017_c0_g1	0.000244479603501542	-0.213919653064043	-1.10382540981046	1.31750058327101	Cluster 2
TR1702_c0_g1	-0.31335976673845	-0.506196546269804	-0.664869329427493	1.48442564243575	Cluster 2
TR17027_c0_g1	-0.538735857783882	-0.555167888304523	-0.402584747755711	1.49648849384412	Cluster 2
TR17041_c2_g1	-0.593335508280468	-0.389306104674542	-0.512073797285461	1.49471541024047	Cluster 2
TR17069_c0_g1	-0.428556730448929	-0.705793172053778	-0.347926211575806	1.48227611407851	Cluster 2
TR17095_c0_g1	-1.07476557533346	-0.564787144804384	0.518256975877668	1.12129574426018	Cluster 2
TR17143_c1_g1	-0.406545305507158	-0.511752791148721	-0.577960950216256	1.49625904687213	Cluster 2
TR17174_c0_g1	-0.194076577014508	-1.2320591686876	0.250773105131105	1.17536264057101	Cluster 2
TR1719_c4_g1	-1.03997366929402	-0.669586752592287	0.921150120872362	0.788410301013939	Cluster 2
TR17327_c0_g1	0.56063673344853	-0.795965732673839	-0.888425739028733	1.12375473825404	Cluster 2
TR1733_c0_g1	-0.973201122545831	-0.751581064936385	0.879253489428783	0.845528698053433	Cluster 2
TR1738_c1_g1	-1.14100343177431	-0.51195384597077	0.63955546314283	1.01340181460225	Cluster 2
TR1740_c13_g1	-0.695135881731828	-0.55057778697747	-0.225007817052436	1.47072148576173	Cluster 2
TR1740_c13_g2	-0.348643365883407	-0.614320596415482	-0.527826745628945	1.49079070792783	Cluster 2
TR17417_c0_g1	-0.959833055008549	-0.76609171416707	0.828207258558995	0.897717510616625	Cluster 2
TR17433_c0_g1	-0.380234715493271	-0.00662453987587493	-0.985669103311436	1.37252835868058	Cluster 2
TR17441_c0_g2	-1.11054003893435	-0.131260269557341	-0.0785416090462783	1.32034191753797	Cluster 2
TR1748_c2_g2	-0.571197544204968	-0.664605923094701	-0.238960923835807	1.47476439113548	Cluster 2
TR17490_c0_g1	-0.828980806916063	-0.0139810264979199	-0.567787253802534	1.41074908721652	Cluster 2
TR1757_c1_g1	-1.08763728803377	-0.55265145044061	0.531745399733569	1.10854333874081	Cluster 2
TR1757_c2_g1	-0.186092160713445	-0.854052101817332	-0.400529484979268	1.44067374751005	Cluster 2
TR1757_c3_g2	-1.20043337565166	0.111641454878439	-0.146169739892389	1.23496166066561	Cluster 2
TR1764_c7_g1	-1.03525615851448	-0.400252250618781	0.110423723779482	1.32508468535378	Cluster 2
TR17641_c0_g1	-0.69505967013374	-0.607941786331552	-0.154226409702475	1.45722786616777	Cluster 2
TR1782_c0_g1	-0.797481083699833	-0.658003373851894	0.0675006146476938	1.38798384290403	Cluster 2
TR1784_c2_g1	-1.06795033441631	-0.415343639795459	0.199940776538251	1.28335319767352	Cluster 2
TR17857_c0_g1	-1.03708948040909	-0.240931491802354	-0.0854647112532243	1.36348568346467	Cluster 2
TR17899_c0_g2	-1.02549425503633	-0.364045092233374	0.0426872766546406	1.34685207061506	Cluster 2
TR17899_c1_g1	-1.21331537664238	-0.426819633911432	0.801773100549129	0.838361910004685	Cluster 2
TR17928_c0_g1	-0.431607428217511	-0.662014401175731	-0.395910573252153	1.48953240264539	Cluster 2
TR1798_c0_g1	-0.718835180147041	-0.594356220533065	-0.13957665521072	1.45276805589083	Cluster 2
TR18_c0_g6	-0.839655309398347	-0.549382339486997	-0.0225743394657915	1.41161198835114	Cluster 2
TR18_c0_g7	-0.889074053197593	-0.56445003996672	0.0807832018790964	1.37274089128522	Cluster 2
TR18040_c0_g1	-0.843250000622408	-0.372245495770252	-0.232385597307122	1.44788109369978	Cluster 2
TR1805_c2_g1	-0.51737742620636	-0.652841049054281	-0.315283322201534	1.48550179746217	Cluster 2
TR1805_c4_g1	-0.85551438952222	-0.386893141305047	-0.199351104842884	1.44175863567015	Cluster 2
TR18058_c0_g1	-0.707791775006809	-0.991628360407287	0.660382838097526	1.03903729731657	Cluster 2
TR1806_c0_g1	-0.250024497494569	-0.59145922528333	-0.6360495815244	1.4775333043023	Cluster 2
TR18111_c0_g1	-0.780095097061273	-0.803258047981438	0.295327624232104	1.28802552081061	Cluster 2
TR1818_c0_g1	-0.547235558509324	-0.542393421835232	-0.407208871423827	1.49683785176838	Cluster 2
TR1818_c2_g2	-0.57265060492941	-0.447774329738676	-0.477445345538127	1.49787028020621	Cluster 2
TR1826_c1_g1	-0.447422650498763	-0.649363410539312	-0.39412230119438	1.49090836223246	Cluster 2
TR18276_c0_g1	-0.574570045749069	-0.440608359308485	-0.482471386321167	1.49764979137872	Cluster 2
TR1828_c0_g2	-0.956623247590483	-0.621613741256136	0.313170848999379	1.26506613984724	Cluster 2
TR18282_c0_g1	-0.988565566820608	-0.685846924349226	0.562867475845227	1.11154501532461	Cluster 2
TR1831_c4_g1	-0.327656549946398	-0.671847776460636	-0.485579583288225	1.48508390969526	Cluster 2
TR18311_c0_g1	-0.5	-0.5	-0.5	1.5	Cluster 2
TR1834_c0_g1	-1.00805443623809	-0.382064571887656	0.034893809667614	1.35522519845813	Cluster 2
TR18359_c0_g1	-0.47829704532991	-0.542714155812053	-0.47829704532991	1.49930824647187	Cluster 2
TR1839_c3_g2	-0.254629036520107	-1.29251679146513	0.589542629779015	0.957603198206219	Cluster 2
TR18402_c0_g1	-0.611078209583989	-0.337547963389251	-0.541240699917248	1.48986687289049	Cluster 2
TR18407_c0_g1	-0.567234652548064	-0.513847861720011	-0.415972078535247	1.49705459280332	Cluster 2
TR18441_c0_g1	-0.181357242238561	-0.573669228649015	-0.707148158936596	1.46217462982417	Cluster 2
TR1847_c0_g1	-0.584359589124159	-0.375549604016845	-0.534139466123666	1.49404865926467	Cluster 2
TR18477_c0_g1	-0.767392574511691	-0.280402967833193	-0.420439314548475	1.46823485689336	Cluster 2
TR18488_c0_g1	-0.731560574147974	-0.582090643890402	-0.137891273688323	1.4515424917267	Cluster 2
TR18527_c0_g1	-0.403232487868346	-0.361998658687092	-0.715922359159522	1.48115350571496	Cluster 2
TR18572_c0_g1	-0.626928196592625	-0.438331690581142	-0.428472821922265	1.49373270909603	Cluster 2
TR1858_c0_g3	-1.3524814684625	0.309537268560746	0.00614974705749832	1.03679445284425	Cluster 2
TR1859_c0_g1	-0.50431149059095	-1.10439027078897	0.463740126520958	1.14496163485897	Cluster 2
TR186_c0_g1	-0.948703443892243	-0.631459500442468	0.314285712663515	1.2658772316712	Cluster 2
TR186_c1_g1	-0.680984345270316	-0.563412253747081	-0.227673898530913	1.47207049754831	Cluster 2
TR18601_c0_g1	0.521193792133079	-1.02327289751311	-0.630784662850547	1.13286376823058	Cluster 2
TR18688_c0_g1	-0.898681260188936	-0.76616793764097	0.501141292545037	1.16370790528487	Cluster 2
TR18714_c0_g1	-0.88975187216141	0.496113932375192	-0.7739377345053	1.16757567429152	Cluster 2
TR18721_c0_g1	-0.240708067966099	-0.708237199977176	-0.523077147695561	1.47202241563884	Cluster 2
TR18733_c0_g1	-0.610774014985166	-0.47006880293001	-0.414010313223585	1.49485313113876	Cluster 2
TR18749_c0_g1	-0.668392057884804	-0.0785970316270344	-0.691418177877037	1.43840726738888	Cluster 2
TR1879_c1_g1	-1.00786932145488	-0.677194492816232	0.612437338874497	1.07262647539662	Cluster 2
TR1887_c0_g4	-0.826228335496188	-0.603529986277206	0.0326058051313596	1.39715251664203	Cluster 2
TR18873_c0_g1	-0.663159144546034	-0.307113745472004	-0.513659418967988	1.48393230898603	Cluster 2
TR1888_c0_g1	-0.923091135388465	-0.581207050025246	0.169635313707297	1.33466287170641	Cluster 2
TR1889_c0_g1	-0.657752407833429	-0.596304832031561	-0.217202550084414	1.4712597899494	Cluster 2
TR18892_c0_g1	-0.872817628913028	-0.726497324650806	0.335175580693697	1.26413937287014	Cluster 2
TR18894_c0_g1	0.0523363667473078	-0.800635057262013	-0.644739496738116	1.39303818725282	Cluster 2
TR1891_c0_g2	-0.411608517333919	-0.306688699189979	-0.754077564762729	1.47237478128663	Cluster 2
TR18943_c1_g1	-1.37475061118117	-0.00969499725797703	0.416884882093021	0.967560726346128	Cluster 2
TR1897_c2_g2	-1.36198787741442	-0.0576866127581585	0.451067610602946	0.968606879569628	Cluster 2
TR1897_c5_g1	-0.932837023453252	-0.657506272037534	0.329927254361691	1.26041604112909	Cluster 2
TR19033_c0_g1	0.218854204488178	-0.974675243566629	-0.548501452857334	1.30432249193578	Cluster 2
TR19044_c0_g1	-1.36963788278824	-0.0717886962914186	0.520609364444066	0.920817214635597	Cluster 2
TR19064_c0_g1	-1.01738855388777	-0.699842003302967	0.839889526858224	0.877341030332511	Cluster 2
TR1910_c0_g1	-0.501078838671161	-0.665931429009617	-0.317743679434	1.48475394711478	Cluster 2
TR1912_c1_g2	-0.740304609520088	-0.0237848870528542	-0.657057504835099	1.42114700140804	Cluster 2
TR19124_c0_g1	-1.03974011413066	-0.591441109322577	0.470075187036452	1.16110603641678	Cluster 2
TR19124_c1_g1	-1.00202662535604	-0.607332934161567	0.397205698831595	1.21215386068601	Cluster 2
TR19213_c0_g2	-1.49318529227895	0.494027847631327	0.38301035378159	0.616147090866036	Cluster 2
TR1925_c2_g1	-0.964996763584147	-0.708489317245254	0.548172163283445	1.12531391754596	Cluster 2
TR19253_c0_g1	-0.622410529506467	-0.563712249324147	-0.298955989757027	1.48507876858764	Cluster 2
TR19294_c0_g1	-1.48866538415855	0.34897497136061	0.649358491012781	0.490331921785162	Cluster 2
TR19336_c0_g1	-0.975329965619393	-0.66183347364118	0.450780246069366	1.18638319319121	Cluster 2
TR19388_c0_g1	-0.420921801404563	-0.538388350633743	-0.538388350633743	1.49769850267205	Cluster 2
TR194_c2_g1	-0.853141749056786	-0.315706854722987	-0.278528422370918	1.44737702615069	Cluster 2
TR19441_c0_g1	-0.71109093979131	-0.283009437575806	-0.482780805276374	1.47688118264349	Cluster 2
TR19472_c0_g1	-0.625207520755703	-0.288697693472131	-0.569730846409604	1.48363606063744	Cluster 2
TR1949_c0_g1	-0.950356342164345	-0.0379247264634472	-0.402250787243446	1.39053185587124	Cluster 2
TR1952_c0_g1	-0.729051987113052	-0.450357483394262	-0.296342099760194	1.47575157026751	Cluster 2
TR1957_c2_g1	-0.684054105308244	-0.508395767155016	-0.287696829475319	1.48014670193858	Cluster 2
TR1957_c2_g2	-0.689738325046028	-0.605497740473816	-0.164421158576353	1.4596572240962	Cluster 2
TR1957_c2_g3	-0.832645471633163	-0.528859566550375	-0.0609216320478525	1.42242667023139	Cluster 2
TR1957_c4_g2	-0.16221807976831	-0.656733107079635	-0.641011531066847	1.45996271791479	Cluster 2
TR19628_c0_g1	-0.618085116254749	-0.76037809265872	-0.0489132106388653	1.42737641955233	Cluster 2
TR19635_c0_g1	-1.37228282514693	0.242281482283683	0.106913336028868	1.02308800683438	Cluster 2
TR19635_c2_g1	-1.33965072775306	-0.0315282622942141	0.322081596255338	1.04909739379193	Cluster 2
TR1964_c1_g3	-0.851237075259862	-0.654487550337203	0.155602669053899	1.35012195654317	Cluster 2
TR19660_c0_g1	-0.700579323906839	-0.421589947809782	-0.361362812408385	1.48353208412501	Cluster 2
TR19668_c0_g1	-0.529602130166743	-0.482409861141983	-0.487653446589179	1.49966543789791	Cluster 2
TR1967_c3_g1	0.254704174280141	-0.463468554569114	-1.05719677817647	1.26596115846545	Cluster 2
TR1969_c2_g1	-0.660622380574026	-0.54712122607402	-0.272174463880042	1.47991807052809	Cluster 2
TR19692_c0_g2	-1.23125599291446	0.0637996300486327	-0.0481187571210171	1.21557511998684	Cluster 2
TR19698_c0_g1	-0.805877212632199	-0.603007159825577	-0.000705562785947812	1.40958993524372	Cluster 2
TR19718_c0_g1	-1.29419294907652	0.694075375500056	-0.275811612098275	0.875929185674743	Cluster 2
TR1978_c0_g2	0.311143370383709	0.12216258143048	-1.3986828153836	0.965376863569411	Cluster 2
TR1982_c0_g1	0.022466442342157	-0.850268433257016	-0.569437903980054	1.39723989489491	Cluster 2
TR19832_c0_g1	-0.5017251322347	-0.439656043710819	-0.556897655367038	1.49827883131256	Cluster 2
TR19833_c0_g1	-1.4313892846907	0.340127954844465	0.199211810790531	0.892049519055706	Cluster 2
TR19838_c0_g1	-0.559696495275992	-0.466496370287607	-0.472445314435802	1.4986381799994	Cluster 2
TR19841_c0_g1	-0.516842575201796	-0.503542243552052	-0.479435392436889	1.49982021119074	Cluster 2
TR19996_c0_g1	-0.76922162296073	-0.400678397236045	-0.299194177274296	1.46909419747107	Cluster 2
TR200_c1_g1	-1.37651592817582	0.240713635435282	0.119438538622162	1.01636375411837	Cluster 2
TR2001_c1_g1	-0.746345200841552	-0.27043754165246	-0.45413364259132	1.47091638508533	Cluster 2
TR20044_c0_g1	-0.535494646365485	-0.400855992422163	-0.559974401627907	1.49632504041556	Cluster 2
TR20072_c0_g1	-1.11596798165866	-0.330893363450536	0.176429223766988	1.27043212134221	Cluster 2
TR20144_c0_g1	-0.909442487944523	-0.774034070667965	0.561792787408641	1.12168377120385	Cluster 2
TR2017_c0_g1	-1.20986256850632	-0.165601865947716	0.157233686551422	1.21823074790262	Cluster 2
TR20183_c0_g1	0.88842935351492	-0.747688069789784	-0.97639265584313	0.835651372117994	Cluster 2
TR20235_c0_g1	-1.468618156257	0.619885727073682	0.202184950407545	0.646547478775776	Cluster 2
TR2026_c0_g1	-0.749711006963558	-0.584149826259105	-0.109957614354655	1.44381844757732	Cluster 2
TR2026_c5_g1	-0.893750981318861	-0.770117230094099	0.497344862881426	1.16652334853153	Cluster 2
TR204_c7_g1	-0.365651611807178	-0.576157586455049	-0.551552992015687	1.49336219027791	Cluster 2
TR2041_c1_g1	-0.821412793745979	-0.899302588490758	0.725997795183625	0.994717587053111	Cluster 2
TR2043_c0_g1	-0.980279597639938	-0.738883542414593	0.771997124665473	0.947166015389059	Cluster 2
TR2045_c0_g1	-0.759134873686358	-0.531869965902905	-0.163040045077248	1.45404488466651	Cluster 2
TR2045_c1_g2	-0.93616312146401	-0.447931874469463	-0.00260931189011332	1.38670430782359	Cluster 2
TR20471_c0_g1	0.293083088734434	-1.36398893655958	0.0454443440959008	1.02546150372924	Cluster 2
TR20530_c0_g1	-0.697306853164868	-0.7636207551185	0.0733900805157574	1.38753752776761	Cluster 2
TR2056_c0_g1	-0.407570920443057	-0.657286145222173	-0.425407722212994	1.49026478787822	Cluster 2
TR2061_c0_g1	0.653495348756645	-0.893675149990767	-0.814106381483757	1.05428618271788	Cluster 2
TR2065_c1_g1	-1.00578979469182	0.161383324920156	-0.473852334885203	1.31825880465687	Cluster 2
TR20664_c0_g1	0.171782162035971	-0.978411444639656	-0.515346486107911	1.3219757687116	Cluster 2
TR2070_c1_g2	-0.994921238225497	-0.0761987632169133	-0.310216698374679	1.38133669981709	Cluster 2
TR20722_c0_g1	0.0223589599211497	-0.768804237288761	-0.658729357676947	1.40517463504456	Cluster 2
TR20723_c0_g1	-0.842348549165873	-0.149476288419714	-0.446490761033277	1.43831559861886	Cluster 2
TR20724_c1_g1	-0.699851145861184	-0.348920039675044	-0.434390366396597	1.48316155193282	Cluster 2
TR207273_c0_g1	-0.5	-0.5	-0.5	1.5	Cluster 2
TR20748_c0_g1	-0.768144180344695	-0.614914899115987	-0.0417534808041719	1.42481256026485	Cluster 2
TR2077_c0_g1	-0.794677154160235	-0.510554644594423	-0.139850866897035	1.44508266565169	Cluster 2
TR2079_c0_g1	-1.12483970066636	-0.485466945881709	0.486944473379311	1.12336217316876	Cluster 2
TR2087_c0_g3	-0.811447636223822	-0.342797196580076	-0.305459661553513	1.45970449435741	Cluster 2
TR20918_c0_g1	0.060458004124387	-0.906870061865805	-0.52961211612963	1.37602417387105	Cluster 2
TR20920_c0_g1	0.651272821954412	-0.977312747691194	-0.722291419639652	1.04833134537643	Cluster 2
TR20926_c0_g1	-0.362721261573872	-0.578666942882968	-0.551673732719331	1.49306193717617	Cluster 2
TR2093_c0_g1	-0.990632610587184	0.618385470254604	-0.699021184740026	1.07126832507261	Cluster 2
TR20934_c4_g1	-0.478043239905692	-0.441358866579596	-0.578091530795046	1.49749363728033	Cluster 2
TR20956_c0_g1	-0.840137050079138	-0.888940736780543	0.797088515111389	0.931989271748292	Cluster 2
TR2096_c0_g1	-0.741254312165577	-0.651334733345474	-0.0305661877643875	1.42315523327544	Cluster 2
TR2099_c0_g1	-0.841640151525718	-0.464586890946543	-0.128770847726913	1.43499789019917	Cluster 2
TR20995_c0_g1	0.692293805222988	-0.184279645994608	-1.33976283169053	0.831748672462151	Cluster 2
TR210_c0_g3	-0.510481876119142	-0.578316179477317	-0.407498563272713	1.49629661886917	Cluster 2
TR210_c0_g4	-1.05369416485491	-0.226413976928171	-0.0737830571259764	1.35389119890906	Cluster 2
TR210_c1_g1	-0.356404902209006	-0.641771689326949	-0.491599947453535	1.48977653898949	Cluster 2
TR2103_c1_g1	-0.538914293304568	-0.649243203744874	-0.295358019313705	1.48351551636315	Cluster 2
TR210740_c0_g1	-0.522947754313358	-0.467999663539878	-0.508646196440808	1.49959361429404	Cluster 2
TR2112_c0_g2	-0.407760820710628	-0.923263321690323	-0.074590394032432	1.40561453643338	Cluster 2
TR2115_c3_g1	-1.0333444395442	-0.660479984874432	0.671634049757715	1.02219037466091	Cluster 2
TR21154_c0_g2	-0.752068712961921	-0.913624214264852	0.506950021329887	1.15874290589689	Cluster 2
TR2116_c1_g1	-0.915206800765416	-0.771957040645612	0.575983410481713	1.11118043092931	Cluster 2
TR21261_c0_g1	0.0897351357501202	-0.371342960136677	-1.04545080918636	1.32705863357292	Cluster 2
TR21266_c0_g1	-0.504996164461744	-0.620555927496468	-0.366324448820075	1.49187654077829	Cluster 2
TR21284_c0_g1	-0.684763110068085	-0.46605357868164	-0.333355656709985	1.48417234545971	Cluster 2
TR213_c1_g2	-1.24823124730529	-0.189357204883531	0.287092753270863	1.15049569891796	Cluster 2
TR21301_c0_g1	-0.701614786051804	-0.554405466974797	-0.212102316013126	1.46812256903973	Cluster 2
TR2133_c1_g1	-0.966665789590295	-0.0622512524186421	-0.360854820930827	1.38977186293976	Cluster 2
TR2133_c1_g2	-1.27609289215636	-0.0512087721638173	0.16963679481503	1.15766486950515	Cluster 2
TR2135_c0_g2	-0.559543906903273	-0.661715075138083	-0.256350043044018	1.47760902508537	Cluster 2
TR21356_c1_g1	-0.413165992934604	-0.584387935952548	-0.498776964443576	1.49633089333073	Cluster 2
TR2138_c0_g1	0.615536790504739	-0.943300329907263	-0.75197424470579	1.07973778410831	Cluster 2
TR21419_c1_g1	0.446566358769076	-1.13023472561424	-0.461112494233867	1.14478086107903	Cluster 2
TR21435_c0_g1	-0.554571810778283	-0.00560173546240684	-0.845862054823441	1.40603560106413	Cluster 2
TR2144_c0_g1	-1.41370445068488	0.766018691662342	0.00375955526788918	0.643926203754646	Cluster 2
TR2149_c1_g1	-0.625734411298796	-0.428647695551523	-0.439467310732482	1.4938494175828	Cluster 2
TR2156_c0_g2	-0.576177290086852	-0.33817464476993	-0.576177290086852	1.49052922494364	Cluster 2
TR2165_c0_g1	-1.2668939860106	-0.257263603380269	0.472884320390457	1.05127326900042	Cluster 2
TR2166_c0_g1	0.784532019751272	-0.453644245051381	-1.1959711914991	0.865083416799204	Cluster 2
TR2166_c11_g1	-1.05934062581326	-0.186398703606272	-0.107582155523489	1.35332148494302	Cluster 2
TR2167_c1_g2	-0.957266461544402	-0.456643022160169	0.0453098001124478	1.36859968359212	Cluster 2
TR2170_c3_g1	-1.04136695601333	-0.665027391986894	0.759916427361082	0.946477920639146	Cluster 2
TR2175_c13_g2	-0.647768543754365	-0.555757212877209	-0.277808810240497	1.48133456687207	Cluster 2
TR2175_c3_g1	-0.426541948711594	-0.566137495562661	-0.50487056111136	1.49755000538562	Cluster 2
TR2175_c6_g1	-0.71348420203758	-0.547350666427998	-0.205194694279692	1.46602956274527	Cluster 2
TR2175_c8_g1	-1.02217481803155	0.180043797464987	-0.464414739207438	1.30654575977401	Cluster 2
TR21793_c0_g1	-0.627816367548244	-0.36099441134024	-0.502253094038595	1.49106387292708	Cluster 2
TR21800_c1_g1	-0.606715465151112	-0.58202355668566	-0.296302901585427	1.4850419234222	Cluster 2
TR2181_c0_g1	-1.03434007584305	-0.67815274385118	0.811897594981459	0.900595224712767	Cluster 2
TR21917_c0_g1	-0.901955669816339	-0.797517619729761	0.619153812621115	1.08031947692498	Cluster 2
TR2192_c0_g2	-0.658058918077223	-0.61500345130768	-0.193645096902826	1.46670746628773	Cluster 2
TR21951_c0_g2	-0.996871600620131	-0.648348932436011	0.48164445263218	1.16357608042396	Cluster 2
TR2217_c0_g2	0.0923839981161606	-0.181457820404056	-1.1708994679804	1.25997329026829	Cluster 2
TR2220_c0_g1	-0.294952604194419	-0.540721218464166	-0.647866648823144	1.48354047148173	Cluster 2
TR2226_c0_g1	-0.939358806363569	0.00828158995889848	-0.452089872371646	1.38316708877632	Cluster 2
TR2228_c0_g1	0.450117799867301	-1.11762073565016	-0.480354720774417	1.14785765655727	Cluster 2
TR22284_c0_g1	-0.73319948692879	-0.392269021684175	-0.352471691110873	1.47794019972384	Cluster 2
TR2232_c0_g1	-0.694753831191782	-0.35425566639977	-0.435080988345349	1.4840904859369	Cluster 2
TR2236_c0_g1	-1.46556922772232	0.219762615080506	0.505017400218117	0.740789212423694	Cluster 2
TR22360_c0_g1	-0.412362313236614	-0.412362313236614	-0.664631022510778	1.48935564898401	Cluster 2
TR22384_c0_g1	-0.758603484745563	0.338988403929168	-0.844130125421516	1.26374520623791	Cluster 2
TR224_c0_g2	-0.391927516012884	-0.594127976535444	-0.508783626314883	1.49483911886321	Cluster 2
TR22426_c0_g1	-0.611568566196003	-0.607577906710221	-0.260390531447238	1.47953700435346	Cluster 2
TR2245_c2_g2	-0.582953305750752	-1.10839233894875	0.871234721262085	0.820110923437415	Cluster 2
TR22639_c0_g1	-0.28236385524339	-0.60695808179884	-0.593709337857802	1.48303127490003	Cluster 2
TR2265_c1_g2	-0.651292640158028	-0.601568437623614	-0.218880904194206	1.47174198197585	Cluster 2
TR2268_c2_g1	-0.552133092624513	-0.747732562501805	-0.153565679689621	1.45343133481594	Cluster 2
TR227_c0_g1	-0.543005715915357	-0.337766174910326	-0.609180451185148	1.48995234201083	Cluster 2
TR2272_c0_g1	-0.6924110331413	-0.509368463166785	-0.276314262051693	1.47809375835978	Cluster 2
TR2273_c1_g1	-0.341368391045036	-0.790403768433834	-0.333634735460299	1.46540689493917	Cluster 2
TR22771_c0_g1	-0.77214353340161	-0.569399286618402	-0.0972488524996837	1.4387916725197	Cluster 2
TR22800_c0_g1	-0.447478414070341	-0.283911983941679	-0.741483896073757	1.47287429408578	Cluster 2
TR2281_c0_g1	-1.06789351425761	-0.173307752655441	-0.107162230594244	1.3483634975073	Cluster 2
TR2288_c0_g1	-0.0588358673386034	-0.998546540025833	-0.319959010014523	1.37734141737896	Cluster 2
TR22883_c0_g1	-0.82435332895769	-0.279634926076072	-0.351568505488867	1.45555676052263	Cluster 2
TR2295_c0_g1	-0.41751708134442	0.243864785077059	-1.08601908747618	1.25967138374354	Cluster 2
TR22982_c0_g2	-0.579701777138752	-0.0923925258345261	-0.766122094751778	1.43821639772506	Cluster 2
TR2311_c0_g1	-0.661319682832002	-0.361771050475126	-0.465291533716105	1.48838226702323	Cluster 2
TR2316_c0_g1	0.206728512547862	-0.96786530874681	-0.549709908365907	1.31084670456485	Cluster 2
TR23193_c0_g1	-0.6705380777076	-0.557677221262056	-0.247611096080704	1.47582639505036	Cluster 2
TR2322_c10_g1	-0.633648747216814	-0.258708660106273	-0.586634983102528	1.47899239042562	Cluster 2
TR2323_c1_g2	-0.641335190238185	-0.537971159003927	-0.30586189313625	1.48516824237836	Cluster 2
TR23233_c0_g1	-0.637536127000371	-0.591113593480927	-0.248618457293025	1.47726817777432	Cluster 2
TR2324_c0_g1	-0.740826562882226	-0.484192160990027	-0.243761190531116	1.46877991440337	Cluster 2
TR2328_c0_g1	-0.723580439749364	-0.534036401522137	-0.207981997968738	1.46559883924024	Cluster 2
TR2328_c1_g1	-0.543465666162496	-0.678703071515432	-0.254120519825982	1.47628925750391	Cluster 2
TR2329_c0_g1	-0.959695913355529	-0.236637348498624	-0.210344309776554	1.40667757163071	Cluster 2
TR23292_c0_g1	0.754427438482929	-0.943698874776039	-0.777820537350617	0.967091973643727	Cluster 2
TR23338_c0_g1	-0.708382500412368	-0.0834914958291932	-0.647540646649805	1.43941464289137	Cluster 2
TR2336_c0_g2	-0.43182137011913	-0.464710444853168	-0.599515047466756	1.49604686243905	Cluster 2
TR23369_c0_g1	-0.460618985338872	-0.0234213043392647	-0.913430869231322	1.39747115890946	Cluster 2
TR23378_c0_g1	-0.623262405545435	-0.595880251329902	-0.260289663618592	1.47943232049393	Cluster 2
TR23383_c0_g1	-0.39314962279133	-0.527492207463745	-0.574907237348126	1.4955490676032	Cluster 2
TR2345_c0_g2	-1.47556499491282	0.348569508602188	0.38163539084113	0.7453600954695	Cluster 2
TR23487_c0_g1	0.258073582806728	-0.941523622791441	-0.610477509673845	1.29392754965856	Cluster 2
TR23524_c0_g1	-0.10266821224212	-1.36476205700883	0.575272765943519	0.892157503307427	Cluster 2
TR23531_c0_g1	-0.836899627819868	-0.317444686414433	-0.298205614510528	1.45254992874483	Cluster 2
TR2354_c0_g1	-0.511554454666387	-0.526522069668424	-0.461340520466005	1.49941704480082	Cluster 2
TR2357_c1_g1	-0.9604783482146	-0.297356069817626	-0.145029494174855	1.40286391220708	Cluster 2
TR2358_c1_g1	0.190639677936797	-0.086429505244663	-1.26675659475765	1.16254642206551	Cluster 2
TR2365_c0_g1	-0.125316390009424	-0.449490660286752	-0.85650477016559	1.43131182046177	Cluster 2
TR23654_c0_g1	0.395076762327592	-0.76312065140113	-0.863315888049182	1.23135977712272	Cluster 2
TR23732_c0_g1	-0.505969882003256	-0.505969882003256	-0.488006454239827	1.49994621824634	Cluster 2
TR23750_c0_g1	-0.7391863230002	-0.663678042693728	-0.0158964800645204	1.41876084575845	Cluster 2
TR23758_c1_g1	-0.621477129429935	-0.577991556441907	-0.283534974453693	1.48300366032553	Cluster 2
TR238_c3_g1	-0.779713680906973	-0.507966946394231	-0.163920621965255	1.45160124926646	Cluster 2
TR2383_c0_g1	-0.763681527828556	-0.475668485234595	-0.223691992101954	1.4630420051651	Cluster 2
TR2388_c0_g2	-0.685545974951933	-0.607773952583436	-0.167065825828622	1.46038575336399	Cluster 2
TR2391_c0_g1	-0.810059946245013	-0.35969634310329	-0.289837962417941	1.45959425176624	Cluster 2
TR23944_c1_g1	-0.607196561606435	-0.0820535894062749	-0.747859857731478	1.43711000874419	Cluster 2
TR23971_c0_g1	-0.590829975265139	-0.545381515629359	-0.356012933813609	1.49222442470811	Cluster 2
TR240_c1_g1	-0.534060679668413	-0.958970271521384	0.163169738417982	1.32986121277181	Cluster 2
TR2405_c0_g3	-0.73636716806949	-0.556850302561781	-0.163167598357188	1.45638506898846	Cluster 2
TR2406_c1_g1	-0.131506715418376	-0.641889655555123	-0.679043969204925	1.45244034017842	Cluster 2
TR2406_c3_g1	-1.3726494842223	0.703987511209597	-0.111023120047392	0.779685093060091	Cluster 2
TR24062_c0_g2	-0.745229118947772	-0.745229118947772	0.1213163682008	1.36914186969474	Cluster 2
TR24063_c0_g3	0.377205189689931	-1.00436562555994	-0.595347949992542	1.22250838586255	Cluster 2
TR24079_c0_g1	-0.390640221472454	-0.800458268943778	-0.269698976434543	1.46079746685078	Cluster 2
TR242_c0_g1	0.230225497776424	0.0647120318074277	-1.35148589505512	1.05654836547127	Cluster 2
TR2423_c0_g1	-0.460494388752477	-0.483959070981903	-0.55435311767018	1.49880657740456	Cluster 2
TR2430_c0_g1	-0.333193338411823	-0.74948673451271	-0.391707058778248	1.47438713170278	Cluster 2
TR2431_c0_g1	-0.872284923110095	-0.368073984896167	-0.196642265903432	1.43700117390969	Cluster 2
TR2433_c1_g1	0.17461932329979	-1.42086303854904	0.328084047576164	0.918159667673087	Cluster 2
TR2433_c2_g1	-1.02897477277868	-0.109815186801299	-0.230833192581113	1.36962315216109	Cluster 2
TR24383_c1_g1	-0.590337561503567	-0.602447049944666	-0.29163684662313	1.48442145807136	Cluster 2
TR24397_c0_g1	-0.580811760116701	-0.504108100723155	-0.411481150012467	1.49640101085232	Cluster 2
TR244_c0_g1	-0.689126981681373	-0.624635098112701	-0.140599240790841	1.45436132058491	Cluster 2
TR2442_c2_g1	-0.631758725715582	-0.527667167656457	-0.328668600778718	1.48809449415076	Cluster 2
TR245_c0_g1	-0.67007926827529	-0.902290110272788	0.285838009544005	1.28653136900407	Cluster 2
TR24526_c0_g1	-0.365091506443685	-0.332982018654242	-0.7717169668569	1.46979049195483	Cluster 2
TR2455_c0_g1	-0.845932275006993	-0.223007182954715	-0.37749260578368	1.44643206374539	Cluster 2
TR2459_c0_g1	-1.23697867904543	-0.386288955172139	0.771848866751341	0.851418767466228	Cluster 2
TR246_c1_g1	-0.499218261561705	-0.597928084823071	-0.397840605239221	1.494986951624	Cluster 2
TR24614_c0_g1	-0.699043842469796	-0.608603950179696	-0.148038798692358	1.45568659134185	Cluster 2
TR24615_c0_g1	-0.781413644657482	-0.305436771981907	-0.380013793507112	1.4668642101465	Cluster 2
TR2463_c0_g1	-0.208731681807293	-1.10185039829682	-0.00936830519107106	1.31995038529518	Cluster 2
TR2465_c0_g1	-0.618133621071486	-0.639612575390177	-0.213101911061875	1.47084810752354	Cluster 2
TR2465_c18_g1	-1.22501022080727	-0.102208829981884	0.112180423150848	1.2150386276383	Cluster 2
TR2465_c2_g1	-0.182230758579898	-0.668179448126294	-0.613719681194371	1.46412988790056	Cluster 2
TR2468_c0_g1	-0.0719228260093165	-0.735574356913463	-0.627690117899488	1.43518730082227	Cluster 2
TR2470_c0_g1	-0.648005476796296	-0.580387846944323	-0.248579024578977	1.4769723483196	Cluster 2
TR2470_c0_g2	-0.59673789727878	-0.587228129991469	-0.301935111372132	1.48590113864238	Cluster 2
TR24799_c0_g1	-0.840406173304258	-0.832755416824597	0.519957180752319	1.15320440937654	Cluster 2
TR24886_c0_g3	-0.557481629504497	-0.529557683840586	-0.409883630995256	1.49692294434034	Cluster 2
TR24951_c0_g1	-0.00910988141559912	-0.490111620159235	-0.898234307578077	1.39745580915291	Cluster 2
TR24968_c1_g1	-0.509364271031958	-0.584825644518174	-0.401562308908793	1.49575222445893	Cluster 2
TR2501_c0_g1	0.161251095742401	-1.45970232742729	0.637406163798497	0.661045067886388	Cluster 2
TR25044_c0_g1	-0.34094281017707	-0.694580299456478	-0.447940819753917	1.48346392938747	Cluster 2
TR25082_c0_g1	-0.745912841740165	-0.809320087762934	0.239452783533133	1.31578014596997	Cluster 2
TR25082_c0_g3	-0.605398219300541	-0.75129399607764	-0.0795270492084028	1.43621926458658	Cluster 2
TR2512_c1_g1	-0.956540441961224	-0.306045917727045	-0.141462965812373	1.40404932550064	Cluster 2
TR2513_c1_g2	-0.127459881811373	-0.286249597167219	-0.979787030412612	1.3934965093912	Cluster 2
TR2514_c0_g1	-0.805639683205223	-0.512931785230093	-0.121268660382689	1.439840128818	Cluster 2
TR2529_c1_g1	-0.978378914453195	-0.745538165933442	0.839570006681804	0.884347073704833	Cluster 2
TR25308_c0_g1	-0.213622225293235	-0.617033992241548	-0.64028539091292	1.4709416084477	Cluster 2
TR2538_c0_g1	0.124441657997094	-1.15907562523728	-0.226263625881044	1.26089759312123	Cluster 2
TR25397_c0_g1	-0.4145999975364	-0.835652339163621	-0.195917849161003	1.44617018586102	Cluster 2
TR25411_c0_g1	-0.462725677562893	0.462725677562893	-1.13396867122684	1.13396867122684	Cluster 2
TR2550_c2_g1	-0.958832623454277	-0.744575918939968	0.657479697592688	1.04592884480156	Cluster 2
TR25508_c0_g1	0.453740697442547	-1.04850970105313	-0.573784741928057	1.16855374553864	Cluster 2
TR2561_c1_g2	-0.551073384403392	-0.613169968237546	-0.324136957561011	1.48838031020195	Cluster 2
TR2561_c2_g1	-0.622903575790217	-0.55415678156894	-0.309291032440899	1.48635138980006	Cluster 2
TR2563_c1_g1	-0.726314254333202	-0.760777340751294	0.115865649829131	1.37122594525536	Cluster 2
TR2565_c2_g1	-1.09729377950713	-0.519433743909649	0.477281442143997	1.13944608127278	Cluster 2
TR257_c1_g1	-1.31469800646232	-0.168574841520954	0.474145766371609	1.00912708161166	Cluster 2
TR25716_c0_g1	0.385360510851277	-0.78647145130138	-0.836872826017624	1.23798376646773	Cluster 2
TR2573_c1_g1	-0.979817268806931	-0.739639219628631	0.774210302464901	0.945246185970661	Cluster 2
TR2574_c2_g1	-0.44035263471227	-0.334595066127129	-0.70656996253004	1.48151766336944	Cluster 2
TR2575_c1_g1	-0.279876754425866	-0.431889022742036	-0.758082015170485	1.46984779233839	Cluster 2
TR2576_c2_g2	-0.853853252898684	-0.0559421096726721	-0.507895469396631	1.41769083196799	Cluster 2
TR25786_c0_g1	-0.330661054471229	-0.62634420598761	-0.531553474254084	1.48855873471292	Cluster 2
TR258_c0_g1	-0.182467559729904	-0.830199267136984	-0.433008833932526	1.44567566079941	Cluster 2
TR25829_c0_g1	-0.838981727854115	-0.759796935562266	0.329936634549371	1.26884202886701	Cluster 2
TR2584_c0_g2	-0.877779001861065	-0.302405570763111	-0.258918043994079	1.43910261661826	Cluster 2
TR25869_c0_g1	-0.11812885112545	-0.918749807520629	-0.377212860239053	1.41409151888513	Cluster 2
TR25970_c0_g1	-0.663043939502657	-0.642406609734751	-0.152130586329632	1.45758113556704	Cluster 2
TR25976_c0_g1	-0.671474226849342	-0.481395368787374	-0.332638001608443	1.48550759724516	Cluster 2
TR25987_c2_g1	0.884315497218312	-0.989458671979786	-0.732740482507428	0.837883657268902	Cluster 2
TR26028_c2_g1	-0.333650446369317	-0.622355605272334	-0.533030379867615	1.48903643150927	Cluster 2
TR26037_c0_g2	-0.347457647264387	-0.704457750107926	-0.430533142894645	1.48244854026696	Cluster 2
TR26096_c1_g1	-0.650537301391497	-1.00399639768836	0.510998314722111	1.14353538435775	Cluster 2
TR26119_c0_g1	-0.46041515169564	-0.204700705592591	-0.791035849687459	1.45615170697569	Cluster 2
TR26207_c1_g1	-0.00950094339303221	-1.38785030613718	0.477897452669522	0.919453796860695	Cluster 2
TR26221_c0_g1	-0.52199077519891	-0.416271124525713	-0.558992652934529	1.49725455265915	Cluster 2
TR2623_c0_g1	0.0167572114746871	0.601736230227392	-1.41522267818037	0.796729236478295	Cluster 2
TR263_c1_g2	-0.962107918753596	-0.423742183936778	0.00936793571378142	1.37648216697659	Cluster 2
TR263_c2_g1	0.757138342135446	-0.665398892822203	-1.04080132557681	0.94906187626357	Cluster 2
TR2632_c1_g1	-0.765816048779239	-0.52902752489055	-0.157359462077926	1.45220303574772	Cluster 2
TR26330_c0_g1	-0.678825417021119	-0.493311689647205	-0.310839170918765	1.48297627758709	Cluster 2
TR2634_c0_g2	-0.743954738160047	-0.0586597603305166	-0.628497432112681	1.43111193060325	Cluster 2
TR2634_c3_g1	-0.522184434143871	-1.04966485646364	0.344239231433586	1.22761005917393	Cluster 2
TR2638_c1_g1	-0.581304475666207	-0.612496907351147	-0.290328640177512	1.48413002319487	Cluster 2
TR26404_c1_g1	-0.562412204515577	-0.515117067824207	-0.419831277725417	1.4973605500652	Cluster 2
TR2641_c0_g1	-0.736347624359748	-0.309943590267888	-0.429315545187459	1.47560675981509	Cluster 2
TR26443_c0_g1	-0.727488840505441	-0.480910884419898	-0.264526147446871	1.47292587237221	Cluster 2
TR26448_c0_g1	-0.604230814619968	-1.03653763121938	0.492943911336951	1.14782453450239	Cluster 2
TR2645_c0_g1	-0.799217997807167	0.380888696521575	-0.822502614197509	1.2408319154831	Cluster 2
TR26468_c0_g1	-0.675305858975717	-0.725657611618643	-0.019252140716413	1.42021561131077	Cluster 2
TR26542_c0_g1	-0.793465837452838	-0.934200655735466	0.915142815759693	0.81252367742861	Cluster 2
TR26542_c1_g1	-0.633588098843557	-0.348495811036463	-0.507675319285091	1.48975922916511	Cluster 2
TR2666_c0_g1	-0.731574605883795	-0.488414338101011	-0.250837543746075	1.47082648773088	Cluster 2
TR2666_c0_g2	-0.796855530448117	-0.412939559052991	-0.250292523267331	1.46008761276844	Cluster 2
TR26681_c0_g1	-0.715681745201003	-0.279954655276496	-0.480389116641769	1.47602551711927	Cluster 2
TR26693_c0_g1	-0.662138042047554	-0.635634851572001	-0.16211118174213	1.45988407536168	Cluster 2
TR26737_c0_g1	-1.28188661623036	-0.214315418651014	0.438645576491327	1.05755645839005	Cluster 2
TR26741_c0_g1	-0.537888495913809	-0.92753670396204	0.109568908422384	1.35585629145346	Cluster 2
TR2692_c0_g1	-0.915819435894557	-0.716920427133674	0.419897907384087	1.21284195564414	Cluster 2
TR2693_c0_g1	-1.30578037663571	0.577905726309149	-0.226004123710322	0.953878774036887	Cluster 2
TR27031_c0_g1	-1.35281898071425	-0.154868166142372	0.822167764373475	0.685519382483147	Cluster 2
TR2715_c0_g2	-0.382368289653071	-0.852690544238445	-0.208312022208089	1.44337085609961	Cluster 2
TR27157_c0_g1	0.0869131333584798	0.386219083055835	-1.40518792043487	0.932055704020554	Cluster 2
TR2716_c3_g2	-0.613401960562176	-1.03361157511484	0.508024317284263	1.13898921839276	Cluster 2
TR2723_c2_g1	-0.886464827155559	-0.46949652995423	-0.0549714063693159	1.4109327634791	Cluster 2
TR27255_c1_g1	-0.641586768812689	-0.592834924713917	-0.24157163774584	1.47599333127245	Cluster 2
TR2727_c0_g1	-0.843478139829756	-0.528652426365791	-0.0445851443922956	1.41671571058784	Cluster 2
TR2744_c0_g1	-0.615687091195658	-0.572543546218716	-0.296720600408461	1.48495123782283	Cluster 2
TR2744_c0_g2	0.23939511029298	-0.0784572210203886	-1.28951483779664	1.12857694852405	Cluster 2
TR2744_c0_g3	-0.649797628520476	-0.579052105546009	-0.247963058025505	1.47681279209199	Cluster 2
TR27531_c0_g1	-1.00001351579085	0.347756416520654	-0.58664710221758	1.23890420148777	Cluster 2
TR2763_c0_g2	-0.0357383722607481	-0.969922800657976	-0.378161846014892	1.38382301893362	Cluster 2
TR2764_c0_g1	-0.680195346450017	-0.520071539211784	-0.279224159729482	1.47949104539128	Cluster 2
TR27695_c0_g1	0.0539676341862879	-0.735707876837741	-0.713510392339526	1.39525063499098	Cluster 2
TR27731_c0_g1	-0.651001824246801	-0.337805070313632	-0.498877686622119	1.48768458118255	Cluster 2
TR2774_c0_g1	-0.553858381775253	-0.460497287808582	-0.484468379502727	1.49882404908656	Cluster 2
TR27761_c0_g1	-0.583669677401654	-0.551355785227168	-0.357472432180252	1.49249789480907	Cluster 2
TR278_c0_g1	-1.069968732177	-0.63327126232283	0.894171031595264	0.809068962904562	Cluster 2
TR2781_c1_g1	-0.863864168961422	-0.257692706828428	-0.321941294980772	1.44349817077062	Cluster 2
TR2785_c0_g1	-0.648654595594259	-0.573444976092388	-0.256027025474598	1.47812659716124	Cluster 2
TR27906_c0_g1	-0.379951087089679	-0.538207195177301	-0.576406945405347	1.49456522767233	Cluster 2
TR2792_c0_g1	-1.08083509172123	-0.611055518148969	0.729412604888777	0.962478004981423	Cluster 2
TR2799_c0_g1	-1.41097835658142	0.444697634895783	0.068089234940086	0.898191486745547	Cluster 2
TR28_c2_g3	0.301692292910631	-0.424080939396362	-1.10534920934491	1.22773785583064	Cluster 2
TR2812_c0_g1	-0.866301453105831	-0.741400993880175	0.352468470389932	1.25523397659607	Cluster 2
TR28185_c0_g1	-0.619726579144097	-0.619726579144097	-0.235772067380087	1.47522522566828	Cluster 2
TR2819_c1_g1	-0.800076473786529	-0.577581554562202	-0.0451009424243446	1.42275897077308	Cluster 2
TR2819_c2_g2	-1.00613761492701	-0.330525670894982	-0.0334893851567605	1.37015267097876	Cluster 2
TR2824_c1_g1	-0.971353396567412	-0.381775713078734	-0.0288575493791882	1.38198665902533	Cluster 2
TR28259_c0_g1	-0.562404235590798	-0.473015482914115	-0.463083399283372	1.49850311778829	Cluster 2
TR2826_c0_g1	0.0176035721529828	-0.938602057258329	-0.45998899408447	1.38098747918982	Cluster 2
TR2829_c0_g1	-0.452841985344553	-0.313698265836659	-0.712799114006008	1.47933936518722	Cluster 2
TR28339_c0_g1	-0.635797942752649	-0.602290543571173	-0.237277987990717	1.47536647431454	Cluster 2
TR2834_c0_g1	-1.03549946717736	-0.569186497784173	0.40468794281491	1.19999802214663	Cluster 2
TR2835_c0_g2	-0.822750625895986	-0.106133981668729	-0.505197752743149	1.43408236030786	Cluster 2
TR28412_c0_g1	-0.817360019910468	0.452168100902222	-0.832486312413768	1.19767823142201	Cluster 2
TR2847_c0_g1	-1.05468844957691	-0.381282867710261	0.121643124069725	1.31432819321745	Cluster 2
TR2847_c1_g1	-1.27836889941937	0.235511329194169	-0.0976557870302087	1.14051335725541	Cluster 2
TR28498_c0_g1	-0.626053274704389	-0.524951503634115	-0.338302080119763	1.48930685845827	Cluster 2
TR2853_c0_g1	-0.918439203794015	-0.386036560000359	-0.108227993114259	1.41270375690863	Cluster 2
TR28559_c0_g1	-0.869423774412084	0.469463254353951	-0.785849934399937	1.18581045445807	Cluster 2
TR2860_c0_g1	0.523481324055331	-0.515786841095184	-1.11287871880259	1.10518423584244	Cluster 2
TR28697_c0_g1	0.075970103587085	-0.578145364586461	-0.874498102438559	1.37667336343793	Cluster 2
TR2870_c0_g1	-0.723075525001813	-0.563471167040131	-0.172833520037557	1.4593802120795	Cluster 2
TR2870_c2_g1	-0.73778807506368	-0.763610657690909	0.140179734262099	1.36121899849249	Cluster 2
TR28757_c0_g1	-1.23319816445126	0.273868141784425	-0.207379922391675	1.16670994505851	Cluster 2
TR2876_c0_g1	-0.387633140142919	-0.798978799732455	-0.274838453045501	1.46145039292088	Cluster 2
TR28780_c1_g1	-0.422952945227708	-0.653616791618464	-0.414184211571397	1.49075394841757	Cluster 2
TR2883_c0_g1	-0.316586175240331	-0.56963507291288	-0.601541238271593	1.4877624864248	Cluster 2
TR28897_c0_g1	-0.507919596845872	-0.461190993936052	-0.53026805910709	1.49937864988901	Cluster 2
TR290_c5_g1	-1.08194358200264	-0.55473299269168	0.516415874212531	1.12026070048179	Cluster 2
TR29054_c0_g1	-0.45880373703686	-0.654195593040999	-0.376812582429695	1.48981191250755	Cluster 2
TR29060_c0_g2	-0.82067249015441	-0.692275229634816	0.163706507162483	1.34924121262674	Cluster 2
TR2909_c3_g1	0.250851443039535	-0.714484733426969	-0.845009061512581	1.30864235190001	Cluster 2
TR2910_c0_g2	-1.29765919431446	-0.186584889929886	0.442308397124282	1.04193568712006	Cluster 2
TR29558_c0_g1	-0.584249405911467	-0.809115156640279	-0.0220850290894369	1.41544959164118	Cluster 2
TR2958_c0_g1	-1.00484218474896	-0.258307683296307	-0.118690195757379	1.38184006380265	Cluster 2
TR29603_c0_g1	-0.511220892662411	-0.548095842297077	-0.439147127467382	1.49846386242687	Cluster 2
TR29644_c0_g1	-0.589325758124104	-0.761447481009492	-0.0863872027374387	1.43716044187104	Cluster 2
TR29700_c0_g1	-0.751158129164965	-0.660496103517202	-0.00238278400740949	1.41403701668958	Cluster 2
TR29704_c0_g1	-1.17524770228393	-0.197861175029546	0.122227494760859	1.25088138255262	Cluster 2
TR2972_c2_g1	-0.911339049619541	-0.819491997753164	0.86713961510364	0.863691432269066	Cluster 2
TR29724_c0_g1	-0.999405812998055	-0.719530844890637	0.914657853674539	0.804278804214153	Cluster 2
TR29823_c0_g1	-0.73116846126892	-0.314451921225709	-0.431090138540603	1.47671052103523	Cluster 2
TR2985_c0_g1	-0.792019937644532	-0.278922275592331	-0.392281061394561	1.46322327463142	Cluster 2
TR2986_c1_g1	-0.586524721661528	-0.603209232343366	-0.295187496678669	1.48492145068356	Cluster 2
TR29924_c0_g1	-0.746084147223742	-0.612858647762413	-0.0769676162753352	1.43591041126149	Cluster 2
TR29996_c0_g1	-0.639755112592513	-0.102807075096903	-0.702135134821673	1.44469732251109	Cluster 2
TR30001_c0_g1	-0.499566770672866	-0.615745089433997	-0.377579535973678	1.49289139608054	Cluster 2
TR30007_c0_g1	-0.363855037885018	0.0964060356789366	-1.05424664823095	1.32169565043703	Cluster 2
TR30008_c0_g1	-0.753008778594174	-0.303445986174206	-0.415925671371918	1.4723804361403	Cluster 2
TR3001_c0_g1	-0.882204947492956	0.176335557177409	-0.632330346290887	1.33819973660643	Cluster 2
TR3009_c0_g2	-0.334598981085205	-0.61747761493642	-0.53725830085921	1.48933489688084	Cluster 2
TR3010_c0_g1	-0.660994390516891	-0.528011037331882	-0.293591821143246	1.48259724899202	Cluster 2
TR30140_c0_g2	-0.661453833496476	-0.55593060760562	-0.260907557209197	1.47829199831129	Cluster 2
TR302_c1_g1	-0.649959073767841	-0.602689322948362	-0.219180023846926	1.47182842056313	Cluster 2
TR3021_c0_g2	-0.547131406883498	-0.609826342941569	-0.332422721753115	1.48938047157818	Cluster 2
TR3023_c0_g1	-1.19433660397911	-0.442860304590912	0.682165378570844	0.955031529999182	Cluster 2
TR3024_c1_g1	-1.37796059558526	0.372785433957872	0.0245357716617708	0.980639389965613	Cluster 2
TR3045_c0_g1	-0.510037735852789	-0.551480866440988	-0.436794183278595	1.49831278557237	Cluster 2
TR3046_c0_g1	-1.46287361830282	0.185773667722775	0.709249265840392	0.567850684739657	Cluster 2
TR3051_c0_g1	-0.0722556821094291	-0.890830121040412	-0.450506903890334	1.41359270704018	Cluster 2
TR30611_c0_g1	-0.52080859452934	-0.496725803778316	-0.482276129327702	1.49981052763536	Cluster 2
TR30625_c0_g1	-0.604159988303903	-0.686765135795636	-0.170043574889898	1.46096869898944	Cluster 2
TR3064_c1_g1	-0.57056423036074	-0.516978374758261	-0.409070594108213	1.49661319922721	Cluster 2
TR30644_c1_g1	-0.868102207739009	-0.614669384764576	0.12119457308591	1.36157701941768	Cluster 2
TR3067_c0_g1	-0.983001212098255	-0.390616068507025	0.00207676312415112	1.37154051748113	Cluster 2
TR30702_c0_g1	-0.60274117023085	-0.577981584290687	-0.305626138948891	1.48634889347043	Cluster 2
TR3078_c0_g2	-0.182648457242092	-0.776757724754833	-0.495760098228537	1.45516628022546	Cluster 2
TR3086_c0_g1	-0.772935664599008	-0.543370323806696	-0.12956155499652	1.44586754340222	Cluster 2
TR3099_c0_g1	-0.399028808031005	-0.466132751723907	-0.627901187412153	1.49306274716706	Cluster 2
TR3115_c0_g1	-1.3684420974498	-0.121723463554296	0.778645592855938	0.71151996814816	Cluster 2
TR31215_c0_g1	-0.723719641998067	-0.551661623040086	-0.186506142482443	1.4618874075206	Cluster 2
TR3127_c0_g1	-0.695209177050583	-0.316004171386629	-0.470495099620091	1.4817084480573	Cluster 2
TR31290_c0_g1	-0.820556278506508	-0.497435671426225	-0.119044434187473	1.43703638412021	Cluster 2
TR3136_c2_g1	-0.514462725026993	-0.53024379021187	-0.45449467732446	1.49920119256332	Cluster 2
TR31410_c0_g1	-0.596405531557795	-0.492577394013523	-0.4064885703226	1.49547149589392	Cluster 2
TR315_c5_g1	0.305410872454409	0.0219709584281166	-1.35797983450071	1.03059800361819	Cluster 2
TR31528_c0_g1	0.161252670068498	0.114210026983745	-1.34665934418974	1.0711966471375	Cluster 2
TR3158_c0_g1	-1.3821983713098	0.40477402459612	0.0154223707060358	0.962001976007642	Cluster 2
TR31623_c0_g1	-1.49011234945532	0.643875706554766	0.364249685422411	0.481986957478139	Cluster 2
TR31697_c0_g1	-0.445527146613324	0.654162176643979	-1.18870976886101	0.980074738830359	Cluster 2
TR3171_c0_g1	-0.507186732767235	-0.597561921481327	-0.389816357813868	1.49456501206243	Cluster 2
TR3171_c1_g2	-0.293469360876049	-0.0167281347173083	-1.04187340321597	1.35207089880933	Cluster 2
TR3174_c1_g2	-0.785803831881707	-0.0900584166875664	-0.559774864508992	1.43563711307827	Cluster 2
TR3175_c0_g1	-0.83106028188138	-0.349388453447719	-0.273064954667951	1.45351368999705	Cluster 2
TR31751_c0_g1	-0.763562960362917	-0.469111136127158	-0.231355004756668	1.46402910124674	Cluster 2
TR3178_c0_g2	-0.238784421275873	-0.468997094095688	-0.75798747061418	1.46576898598574	Cluster 2
TR3188_c3_g1	-0.883758811792021	0.643000597283895	-0.822101220271647	1.06285943477977	Cluster 2
TR31913_c0_g1	-0.52411838110167	-1.13467262539813	0.653293041397218	1.00549796510259	Cluster 2
TR31918_c0_g1	-0.612977494356825	-0.646047571123667	-0.211412276473741	1.47043734195423	Cluster 2
TR3211_c0_g1	-0.42032515054152	-0.683455529335805	-0.382735096428051	1.48651577630538	Cluster 2
TR3213_c0_g1	-0.32957768431889	-0.133123535234689	-0.944789361714153	1.40749058126773	Cluster 2
TR3223_c2_g1	0.735077565014597	-0.642252465480397	-1.05707186290007	0.964246763365865	Cluster 2
TR3233_c0_g1	-0.747316294844168	-0.480577917619651	-0.239487461282108	1.46738167374593	Cluster 2
TR32419_c0_g1	-0.66458535397893	-0.513706516859389	-0.305350027503833	1.48364189834215	Cluster 2
TR325_c0_g2	-0.980891369688267	-0.501263783399233	0.154479421325269	1.32767573176223	Cluster 2
TR3250_c0_g1	0.831512679671896	-0.566834044571629	-1.12033183764332	0.855653202543051	Cluster 2
TR32559_c0_g1	-0.931263932905425	-0.796560944001163	0.916584761037653	0.811240115868935	Cluster 2
TR32580_c1_g1	-0.466037427231203	-0.536304711159633	-0.497037699552569	1.49937983794341	Cluster 2
TR32604_c0_g1	-0.791215281231997	-0.409800897890824	-0.261124567542374	1.4621407466652	Cluster 2
TR32611_c2_g1	-0.674400923668468	-0.527525949366806	-0.277838493053979	1.47976536608925	Cluster 2
TR32763_c0_g1	0.0904914805470102	-0.362207232802835	-1.05235559110804	1.32407134336386	Cluster 2
TR3280_c1_g1	-0.54955502340339	-0.531923338265285	-0.415882247705196	1.49736060937387	Cluster 2
TR3281_c0_g1	-0.219661537480967	0.455930193881407	-1.28345939620917	1.04719073980873	Cluster 2
TR32879_c0_g1	-0.889069162901124	-0.641536494856433	0.205566234771382	1.32503942298617	Cluster 2
TR32882_c0_g1	0.198752988814664	-1.466522610118	0.578257582156398	0.689512039146938	Cluster 2
TR3297_c0_g1	-1.06989111575613	-0.588973121015206	0.572013796263637	1.0868504405077	Cluster 2
TR3315_c0_g2	-0.785681210675914	-0.542574561686606	-0.112462798090139	1.44071857045266	Cluster 2
TR3317_c0_g1	-0.552439994338871	-0.540825764858994	-0.403288836807823	1.49655459600569	Cluster 2
TR33276_c0_g1	-0.533966072658357	-0.358559752595387	-0.599684973908616	1.49221079916236	Cluster 2
TR33289_c0_g1	-0.765181399833449	-0.961253940941694	0.853247880161728	0.873187460613414	Cluster 2
TR3329_c0_g2	-0.527957426693456	-0.318883534750585	-0.639830298697975	1.48667126014202	Cluster 2
TR33313_c0_g1	-0.670864068093919	-0.453669886814751	-0.362891584108683	1.48742553901735	Cluster 2
TR3333_c1_g1	-1.05295119107361	0.919731089039963	-0.653290884972676	0.786510987006319	Cluster 2
TR3338_c0_g1	-0.780035058435657	-0.703565391834954	0.110925475679508	1.3726749745911	Cluster 2
TR33397_c0_g1	0.628042866144164	0.0173527982675016	-1.41745654006273	0.772060875651068	Cluster 2
TR3346_c1_g1	-0.536878867023934	-0.526489338876398	-0.435061491178079	1.49842969707841	Cluster 2
TR33475_c0_g1	-0.361942286367184	-0.626677215824324	-0.50258271764129	1.4912022198328	Cluster 2
TR335_c0_g1	-1.11430456484789	0.318555410158007	-0.420733823791826	1.21648297848171	Cluster 2
TR335_c0_g6	-0.841746514771539	0.273322125352643	-0.729495030632159	1.29791942005106	Cluster 2
TR335_c2_g1	-1.02247630551381	-0.693523294167534	0.882902932741884	0.833096666939456	Cluster 2
TR33530_c0_g1	-0.691630310368532	0.392890801769321	-0.928280858066374	1.22702036666558	Cluster 2
TR3359_c1_g1	-0.162779770201427	-0.100451092387997	-1.07850172851698	1.34173259110641	Cluster 2
TR3365_c0_g1	-0.15306087683872	-0.820858752962003	-0.469205325912521	1.44312495571324	Cluster 2
TR33706_c0_g2	-0.557980066166995	-0.701685193871975	-0.207698817386105	1.46736407742507	Cluster 2
TR33717_c1_g1	-0.769618107628696	-0.956525362338522	0.824590829602174	0.901552640365044	Cluster 2
TR33726_c0_g1	-0.784379295386569	-0.506477176341853	-0.159268842393215	1.45012531412164	Cluster 2
TR338_c3_g3	-0.774643722946367	-0.448456019226547	-0.240162466404185	1.4632622085771	Cluster 2
TR3383_c0_g1	-0.734107561121708	-0.429571516619684	-0.312442268734289	1.47612134647568	Cluster 2
TR3386_c0_g1	-0.320649190974063	-0.24461157521735	-0.874432581202199	1.43969334739361	Cluster 2
TR339_c1_g1	-0.631923837957838	-0.578914774288085	-0.269927732107818	1.48076634435374	Cluster 2
TR340_c2_g1	-0.657956315648379	-0.224880132702049	-0.589800063906005	1.47263651225643	Cluster 2
TR3413_c0_g1	-0.858222718979571	-0.56126189678381	0.0238230120999296	1.39566160366345	Cluster 2
TR34138_c0_g1	-0.274250438460309	-0.511968670412899	-0.691695620224101	1.47791472909731	Cluster 2
TR3417_c2_g1	-0.348508917193535	-0.934336384982046	-0.127573779228467	1.41041908140405	Cluster 2
TR3420_c0_g1	-0.533421505066678	-0.597040583652612	-0.36213937041224	1.49260145913153	Cluster 2
TR34240_c0_g1	-0.893919319790478	-0.836432546813599	0.911165351683542	0.819186514920535	Cluster 2
TR3439_c0_g1	-0.245307454996619	-0.65670398733154	-0.574116662871231	1.47612810519939	Cluster 2
TR344_c6_g1	-0.142439913134051	-0.736013049599788	-0.57372856652446	1.4521815292583	Cluster 2
TR34432_c0_g1	-0.742974419998658	0.238627127881756	-0.811749050741871	1.31609634285877	Cluster 2
TR3445_c0_g1	0.00347164076215994	-0.256207088247363	-1.07829162072671	1.33102706821191	Cluster 2
TR34472_c1_g1	-1.32322560742445	0.8482215432208	-0.218995380249734	0.693999444453382	Cluster 2
TR3453_c1_g1	-1.30468222111631	-0.262429365595229	0.806092068264661	0.761019518446873	Cluster 2
TR34552_c0_g1	-0.533848357496675	-0.430522868948932	-0.533848357496675	1.49821958394228	Cluster 2
TR3465_c0_g1	-0.668839560071192	0.192248204013579	-0.857634203533629	1.33422555959124	Cluster 2
TR347_c3_g1	-0.984654884653615	0.0973932185746086	-0.458409267803249	1.34567093388226	Cluster 2
TR3470_c0_g1	-0.244205922358539	-0.882652778197855	-0.310178764128601	1.43703746468499	Cluster 2
TR3476_c0_g1	-0.19290247570223	-1.33140532249383	0.643008252340768	0.881299545855287	Cluster 2
TR3482_c0_g1	-0.829136449898784	-0.381797290820622	-0.241168622035026	1.45210236275443	Cluster 2
TR3486_c0_g2	-1.01175692133804	-0.696519438441709	0.727440620114136	0.98083573966561	Cluster 2
TR34884_c0_g1	-0.689259189729576	-0.66370017044168	-0.08810332325394	1.4410626834252	Cluster 2
TR34885_c0_g1	-0.691824291451833	-0.653916111098308	-0.0979294659132733	1.44366986846342	Cluster 2
TR34939_c0_g1	-0.62490785287442	-0.0902058380305254	-0.725415750401468	1.44052944130641	Cluster 2
TR3496_c0_g1	-0.73921577890144	-0.763343070804601	0.142171125753931	1.36038772395211	Cluster 2
TR3508_c0_g1	0.0674612673971837	-0.263316559840622	-1.10767048726344	1.30352577970688	Cluster 2
TR3511_c2_g1	-0.561700391640865	-0.799736965314925	-0.0669970488817718	1.42843440583756	Cluster 2
TR3525_c0_g1	-0.639980006053674	-0.342275493725646	-0.506584669804273	1.48884016958359	Cluster 2
TR353_c0_g1	-0.7448001540183	-0.594864445964356	-0.102844346892247	1.4425089468749	Cluster 2
TR3534_c0_g1	-1.35341565136556	-0.108100291642617	0.520322737106462	0.941193205901717	Cluster 2
TR3537_c1_g2	-1.07119044540248	-0.523020563672442	0.40452038706206	1.18969062201286	Cluster 2
TR35373_c0_g1	-0.784397206972959	-0.656805446011717	0.0442896068329277	1.39691304615175	Cluster 2
TR35472_c0_g1	-0.805413561063913	-0.857836928943813	0.490873353784515	1.17237713622321	Cluster 2
TR3548_c1_g1	-1.29456482809411	0.132024181281501	0.0196115552592736	1.14292909155333	Cluster 2
TR3555_c1_g2	-0.663458606156846	-0.381238727877912	-0.444290730693262	1.48898806472802	Cluster 2
TR35579_c0_g1	-0.520914194327627	-0.518099709711719	-0.460402775085607	1.49941667912495	Cluster 2
TR35700_c0_g1	-0.703101564990187	0.463996871069624	-0.943878319707397	1.18298301362796	Cluster 2
TR3572_c6_g1	-0.668046260519031	-0.729668976374036	-0.0238087765803428	1.42152401347341	Cluster 2
TR3578_c0_g1	-0.5915103682678	-0.611380225599793	-0.279706453211906	1.4825970470795	Cluster 2
TR35889_c0_g1	-0.460122601769937	0.323127220815802	-1.08789586781244	1.22489124876657	Cluster 2
TR3590_c0_g1	-0.730563010793348	0.334387049716359	-0.868679400893584	1.26485536197057	Cluster 2
TR3592_c0_g1	-0.31345126646046	-0.59887030583909	-0.57508538589087	1.48740695819042	Cluster 2
TR360_c1_g1	-0.619893721640413	-1.08113390502457	0.842335795896603	0.858691830768382	Cluster 2
TR36006_c0_g1	-0.517325713115501	-0.513299832079582	-0.469015140684481	1.49964068587956	Cluster 2
TR3609_c0_g1	-0.683497393048232	-0.174802959729566	-0.603791131521867	1.46209148429967	Cluster 2
TR36136_c0_g1	-0.312116377473919	-1.1836866390992	0.310433809401284	1.18536920717184	Cluster 2
TR36196_c0_g2	-0.448450544479687	-0.170713172806698	-0.825774311768585	1.44493802905497	Cluster 2
TR36208_c0_g1	-0.583827511212264	-0.446588674279902	-0.466837027269922	1.49725321276209	Cluster 2
TR36253_c0_g1	-0.954192130051733	-0.630733800073014	0.325720450177618	1.25920547994713	Cluster 2
TR36303_c0_g1	-0.700466554232405	-0.583356731263451	-0.178131165982419	1.46195445147828	Cluster 2
TR3632_c0_g1	-0.568709293951471	-0.210829925172041	-0.689183536906923	1.46872275603043	Cluster 2
TR3634_c0_g1	-0.557435133362361	-0.367901151905099	-0.568300138668828	1.49363642393629	Cluster 2
TR36381_c0_g1	-0.97877460338218	-0.172981925301328	-0.245342162404488	1.397098691088	Cluster 2
TR36435_c0_g2	-0.510770985699456	-0.567247717775301	-0.419187095846733	1.49720579932149	Cluster 2
TR3683_c0_g1	-1.08884467305764	-0.600717579984168	0.730226852047812	0.959335400993995	Cluster 2
TR3687_c0_g1	-0.00661969508883972	-0.675810689524299	-0.733582573935993	1.41601295854913	Cluster 2
TR36927_c0_g1	-0.526637437589772	-0.472453589431088	-0.500541776436242	1.4996328034571	Cluster 2
TR37013_c1_g2	-0.558932713117921	-0.579444005342431	-0.353819790872812	1.49219650933316	Cluster 2
TR371_c0_g1	-0.986414008109212	-0.735303108885638	0.815241526631551	0.906475590363299	Cluster 2
TR37101_c0_g1	-0.814000918422676	-0.638086603678345	0.0642398229039727	1.38784769919705	Cluster 2
TR3714_c0_g2	-0.821718656900344	-0.288322335754507	-0.346520733156805	1.45656172581166	Cluster 2
TR3717_c0_g2	-0.279801312151988	-0.22846162184887	-0.916413471910639	1.4246764059115	Cluster 2
TR3717_c0_g3	-0.887847353455507	-0.836271158648963	0.747854824694888	0.976263687409582	Cluster 2
TR3719_c0_g2	-1.49419537935994	0.39751639530496	0.485060400973558	0.611618583081421	Cluster 2
TR372_c1_g1	-1.36027848390193	-0.106876188154427	0.557582292389646	0.909572379666709	Cluster 2
TR372_c2_g2	0.428132037408985	-1.05898007364475	-0.549526714512637	1.1803747507484	Cluster 2
TR3730_c10_g1	-1.43857106619414	0.469073915415486	0.137962916298672	0.831534234479981	Cluster 2
TR3731_c0_g1	-1.38012842040874	0.442388260165281	-0.0106400169467865	0.948380177190242	Cluster 2
TR37365_c0_g1	-0.831169164884352	0.317215679736125	-0.761958471123743	1.27591195627197	Cluster 2
TR3738_c1_g1	-0.984521659511579	-0.736797430661302	0.804192992922039	0.917126097250842	Cluster 2
TR374_c0_g1	-0.657584182583771	-0.678844935430003	-0.1108012311794	1.44723034919317	Cluster 2
TR37409_c0_g1	-0.622982394269049	-0.510564518611477	-0.357551298966447	1.49109821184697	Cluster 2
TR37443_c1_g1	-0.700168897753995	-0.0373865856936572	-0.688665332925177	1.42622081637283	Cluster 2
TR37508_c0_g1	-1.38381637704841	0.0362018672870737	0.377404466467748	0.970210043293586	Cluster 2
TR37539_c0_g1	-0.901032544698788	0.487455807310367	-0.758873148209772	1.17244988559819	Cluster 2
TR3756_c0_g1	-1.34303463343698	-0.0581861099365154	0.3756776369791	1.02554310639439	Cluster 2
TR37688_c0_g1	-0.573076348026219	0.0362888471163937	-0.855482623605283	1.39227012451511	Cluster 2
TR3771_c0_g1	-0.920961533571517	-0.68318350520764	0.355726521774549	1.24841851700461	Cluster 2
TR37736_c2_g1	-0.279436861886095	-0.719038754365441	-0.477087325171383	1.47556294142292	Cluster 2
TR37747_c0_g1	-0.713376096368599	-0.637786576223582	-0.0897625551722078	1.44092522776439	Cluster 2
TR3775_c0_g2	-0.818979830348227	-0.304891947711161	-0.33382330041368	1.45769507847307	Cluster 2
TR3776_c0_g1	-0.869452903550438	-0.629580995857706	0.147799365460792	1.35123453394735	Cluster 2
TR3778_c2_g1	-0.967877847189754	-0.690950399817396	0.505419955826824	1.15340829118033	Cluster 2
TR3784_c0_g2	-0.183696579064791	-0.549103061175133	-0.728187713766686	1.46098735400661	Cluster 2
TR37884_c0_g1	-0.479545512873353	-0.115934080035316	-0.837887214800694	1.43336680770936	Cluster 2
TR38_c0_g1	-0.690700409932609	-0.541206685978573	-0.241726672258462	1.47363376816964	Cluster 2
TR3805_c0_g1	-0.713459634679323	-0.66529830926141	-0.0515214178889306	1.43027936182966	Cluster 2
TR3819_c1_g1	-1.00691580058887	-0.231600574074241	-0.144129112621309	1.38264548728442	Cluster 2
TR38221_c0_g1	-0.447131011067294	-0.551952933075744	-0.499541972071519	1.49862591621456	Cluster 2
TR38236_c0_g1	-0.504372875847438	-0.506253110240159	-0.489331000705669	1.49995698679327	Cluster 2
TR38239_c0_g1	-0.189572699825602	-0.703253563869169	-0.571164198829395	1.46399046252417	Cluster 2
TR38267_c0_g1	-0.574691299869419	-0.619628401847749	-0.289573135593118	1.48389283731029	Cluster 2
TR3830_c0_g1	-0.924749370528571	0.0279490611329264	-0.484855451827726	1.38165576122337	Cluster 2
TR3841_c0_g1	-0.548362596040196	-0.632271176523738	-0.304832143249449	1.48546591581338	Cluster 2
TR3846_c1_g1	-1.33762607559984	0.765860247716563	-0.194094419833287	0.765860247716563	Cluster 2
TR3856_c0_g1	-1.20091168704942	-0.427846671012944	0.658925887762979	0.96983247029939	Cluster 2
TR3862_c0_g1	-1.45572476047879	0.75296108300627	0.168383702106888	0.534379975365631	Cluster 2
TR38706_c0_g1	-0.574121515163344	-0.94848474933635	0.208312966082285	1.31429329841741	Cluster 2
TR38729_c0_g1	0.0203671892563734	-0.126389463122117	-1.16723279768341	1.27325507154916	Cluster 2
TR3875_c0_g1	-0.0134713121200328	-0.782372357740375	-0.619680357521516	1.41552402738192	Cluster 2
TR3876_c0_g2	-0.494568791060201	-0.59808318918908	-0.402555992723419	1.4952079729727	Cluster 2
TR3883_c0_g1	-1.07316249184278	-0.630312644915202	0.84417235240466	0.859302784353324	Cluster 2
TR3886_c0_g1	-0.817811225873339	-0.483724040994537	-0.13986465326736	1.44139992013524	Cluster 2
TR3886_c1_g3	0.795963630938746	-1.16179901990263	-0.506193025818838	0.872028414782721	Cluster 2
TR38870_c0_g1	-0.357258939061808	-0.614572339954007	-0.519678431672689	1.4915097106885	Cluster 2
TR38904_c0_g1	-0.969995203665667	-0.745378809157284	0.730671783326378	0.984702229496573	Cluster 2
TR3901_c1_g1	-0.816201178743473	-0.837062834343954	0.461597420036585	1.19166659305084	Cluster 2
TR3906_c1_g2	0.379153827907536	-0.64307019918048	-0.965283166162689	1.22919953743563	Cluster 2
TR39063_c0_g1	-0.630989799885251	-0.665689673106147	-0.163454665961592	1.46013413895299	Cluster 2
TR39087_c0_g1	-0.842243967768236	-0.855226533745395	0.605312138685071	1.09215836282856	Cluster 2
TR39177_c0_g1	-0.191745527468191	-1.29275669691704	0.433916595660849	1.05058562872438	Cluster 2
TR3918_c0_g1	0.112217730681183	-0.785524114768288	-0.698645871660274	1.37195225574738	Cluster 2
TR3923_c0_g1	-0.938803402841599	-0.436543582321343	-0.0131432476397824	1.38849023280272	Cluster 2
TR393_c1_g1	-0.756933797267309	-0.551192811787095	-0.142064856678843	1.45019146573325	Cluster 2
TR393_c1_g3	-1.04699415447946	0.541683079922997	-0.608365089761639	1.1136761643181	Cluster 2
TR393_c11_g1	-0.757731140772302	-0.297894300725786	-0.415566833706634	1.47119227520472	Cluster 2
TR393_c3_g2	-0.56262281679596	-0.453887513989127	-0.481895091984827	1.49840542276991	Cluster 2
TR393_c41_g1	-0.474139046073762	-0.496470237478413	-0.529009973525191	1.49961925707737	Cluster 2
TR3944_c0_g1	-0.472529331689363	-0.386389015307779	-0.633214152631933	1.49213249962908	Cluster 2
TR395_c2_g1	0.843959385183608	-0.867201706521478	-0.864570500332286	0.887812821670156	Cluster 2
TR3955_c0_g1	-0.366277209190563	-0.25643403787926	-0.830177981233446	1.45288922830327	Cluster 2
TR39635_c0_g1	-0.644879035815033	-0.539846977531839	-0.29951938654487	1.48424539989174	Cluster 2
TR39635_c2_g1	-0.130627906585742	-0.559028620866939	-0.758033986997563	1.44769051445024	Cluster 2
TR3965_c1_g2	-0.784160847235455	-0.326519434750501	-0.356161773430954	1.46684205541691	Cluster 2
TR3966_c0_g1	0.0311727319659706	-0.586367713146459	-0.840678064046709	1.3958730452272	Cluster 2
TR3970_c0_g1	-0.359056445809781	-0.681057244187236	-0.445945550133856	1.48605924013087	Cluster 2
TR3979_c0_g1	-0.880030775133136	-0.847840661049394	0.780442609686559	0.947428826495971	Cluster 2
TR3984_c1_g1	-0.488317457147527	-0.488317457147527	-0.523162706815141	1.4997976211102	Cluster 2
TR3986_c0_g1	-1.2309471274638	-0.397487616416403	0.835108837256592	0.79332590662361	Cluster 2
TR3987_c1_g1	0.309850180357733	-0.649140194124785	-0.931502353232934	1.27079236699998	Cluster 2
TR3989_c0_g1	-1.11678137958591	0.566452494135515	-0.524991786088061	1.07532067153846	Cluster 2
TR39947_c0_g1	-0.586347381017483	-0.60873664395912	-0.288890030507152	1.48397405548376	Cluster 2
TR39967_c0_g1	0.714146526934739	-0.211540062544144	-1.32808986634857	0.825483401957973	Cluster 2
TR4005_c7_g2	-0.806045849642819	-0.130100657223554	-0.505368775170605	1.44151528203698	Cluster 2
TR40153_c0_g1	-0.00947299987753886	-0.492827042409509	-0.895776110371151	1.3980761526582	Cluster 2
TR4024_c1_g2	-0.830499882813346	-0.867500145976796	0.60805251752947	1.08994751126067	Cluster 2
TR404_c1_g1	-0.575307635389304	-0.544590783520439	-0.37422308964982	1.49412150855956	Cluster 2
TR4048_c0_g1	-1.36610996384503	-0.102566211721768	0.584807347536399	0.883868828030397	Cluster 2
TR4049_c0_g1	-0.780406721305831	-0.900248048287684	0.550311373500672	1.13034339609284	Cluster 2
TR4056_c0_g2	0.605564195421036	-1.37994885635907	-0.0760556363421281	0.85044029728016	Cluster 2
TR406_c0_g1	-1.01957651738756	-0.695344881448626	0.914388368182584	0.800533030653602	Cluster 2
TR4062_c1_g1	-0.500774246279124	-1.10558746339186	0.459158657945678	1.14720305172531	Cluster 2
TR4067_c1_g1	-0.706358541427083	-0.448119934883848	-0.326595884745856	1.48107436105679	Cluster 2
TR40751_c0_g1	-0.150111806451413	-0.607305125592775	-0.698743789421047	1.45616072146523	Cluster 2
TR40793_c0_g1	-0.90077410006715	-0.346086891078431	-0.18015482001343	1.42701581115901	Cluster 2
TR4080_c1_g1	-0.376257324456523	-0.700048488132256	-0.407665638393323	1.4839714509821	Cluster 2
TR4085_c0_g1	-0.763872477746206	-0.458130893523804	-0.243389560353424	1.46539293162343	Cluster 2
TR4114_c0_g1	-0.265390460859594	-0.732647070138987	-0.474314866217147	1.47235239721573	Cluster 2
TR412_c1_g1	0.233556843971992	-0.966658256206134	-0.566804578871586	1.29990599110573	Cluster 2
TR4135_c0_g1	0.0240443826654676	-0.272015146502382	-1.07907007770853	1.32704084154544	Cluster 2
TR41456_c0_g1	-1.49435330074237	0.521286035142687	0.382276425771303	0.590790839828378	Cluster 2
TR4148_c0_g1	0.0095385448876889	-0.486465789272122	-0.91252079425555	1.38944803863998	Cluster 2
TR4153_c0_g1	-0.757703123890775	-0.967862614987127	0.875809284176328	0.849756454701574	Cluster 2
TR4156_c1_g1	-0.702678306376669	-0.344526482627896	-0.435362090100411	1.48256687910498	Cluster 2
TR4159_c3_g2	-0.904400209929587	-0.789418856263529	0.597543722333295	1.09627534385982	Cluster 2
TR41638_c0_g2	-0.246193496432503	-0.691365298200864	-0.536679338798524	1.47423813343189	Cluster 2
TR4166_c17_g1	-0.818226376048795	-0.879117641243124	0.606629229498502	1.09071478779342	Cluster 2
TR4175_c0_g1	-1.31510007597803	-0.0158445792286512	0.226978369914048	1.10396628529263	Cluster 2
TR41752_c0_g1	-1.23320748976832	-0.0954672955519332	0.122397848021416	1.20627693729883	Cluster 2
TR4179_c5_g1	-0.760265440669855	-0.702226976796676	0.075719055516664	1.38677336194987	Cluster 2
TR41817_c0_g1	-0.0152345592961375	-0.831806937569106	-0.563678693957086	1.41072019082233	Cluster 2
TR4182_c0_g2	0.0869555137532747	-0.975641881930395	-0.462762081677024	1.35144844985414	Cluster 2
TR4186_c0_g1	-0.808138708718756	-0.839045580964426	0.445236294850537	1.20194799483265	Cluster 2
TR41897_c0_g1	-0.527296372632986	-0.444257573793146	-0.527296372632986	1.49885031905912	Cluster 2
TR4193_c0_g1	-0.71167700449523	-0.589775151847398	-0.155125103471933	1.45657725981456	Cluster 2
TR4195_c0_g1	-0.60422790386958	-0.398154387181429	-0.492286734310584	1.49466902536159	Cluster 2
TR42007_c0_g1	-0.736154188075734	-0.142253641642775	-0.573722724923345	1.45213055464185	Cluster 2
TR4202_c0_g1	-1.02916879411098	-0.592132178791104	0.439245953830862	1.18205501907122	Cluster 2
TR4211_c0_g1	-0.980765591075014	-0.232155515176491	-0.183670406633841	1.39659151288534	Cluster 2
TR42142_c0_g1	-0.505180252365618	-0.589044167778092	-0.401348738045412	1.49557315818912	Cluster 2
TR42234_c0_g2	-0.543081923791354	-0.525976981309736	-0.429048973913904	1.49810787901499	Cluster 2
TR4225_c0_g1	-0.206665201533639	-0.44893177087972	-0.799331955324175	1.45492892773753	Cluster 2
TR4228_c1_g1	-0.660297400630637	-0.132551544067862	-0.660015943938126	1.45286488863663	Cluster 2
TR4259_c0_g1	-0.521731617722751	-0.494180152599422	-0.483896859278743	1.49980862960092	Cluster 2
TR4261_c1_g1	-0.65717169704315	-0.479516332659544	-0.351481949362393	1.48816997906509	Cluster 2
TR4261_c1_g2	-0.663368802121667	-0.487223213813616	-0.335918670010546	1.48651068594583	Cluster 2
TR42702_c0_g1	0.323673443789095	-0.683657659921237	-0.90698843175159	1.26697264788373	Cluster 2
TR4290_c0_g1	-0.0418000873909847	-1.04435412140421	-0.268622267031987	1.35477647582719	Cluster 2
TR4291_c0_g1	-0.854564501895859	-0.760141087019671	0.366746410887059	1.24795917802847	Cluster 2
TR4292_c0_g2	-0.648863396827983	-0.492605765777444	-0.347099806588181	1.48856896919361	Cluster 2
TR4294_c0_g1	-0.109334346316907	-0.668781107744237	-0.668781107744237	1.44689656180538	Cluster 2
TR4298_c0_g1	-0.734880764901681	-0.947842199224504	0.571391909936929	1.11133105418926	Cluster 2
TR4299_c0_g1	-0.639735632561054	-0.547039699734374	-0.297473726739466	1.48424905903489	Cluster 2
TR4299_c2_g2	-0.537962140536664	-1.12218454835942	0.638690141885415	1.02145654701067	Cluster 2
TR4309_c0_g1	-0.431797676184819	-0.0484670861023776	-0.920874635945176	1.40113939823237	Cluster 2
TR4310_c0_g1	-0.683552622256916	-0.63700553322555	-0.131883418922204	1.45244157440467	Cluster 2
TR43173_c0_g1	-1.30121707442617	0.188784817647174	-0.0149413170169778	1.12737357379598	Cluster 2
TR43276_c0_g1	-0.462707865133702	-0.517003733350887	-0.51977065721129	1.49948225569588	Cluster 2
TR43294_c0_g1	-0.685804391989123	-0.557115301122175	-0.229090033058132	1.47200972616943	Cluster 2
TR4340_c0_g1	-0.092772739126171	-0.603736440774925	-0.743609185918998	1.44011836582009	Cluster 2
TR4350_c0_g1	0.880550151186307	-0.93295028954927	-0.796254276428498	0.84865441479146	Cluster 2
TR43561_c0_g1	-0.950216315111253	-0.317463402656622	-0.138429527098069	1.40610924486594	Cluster 2
TR43563_c0_g1	-1.4760287627232	0.498408225963664	0.270799517545594	0.706821019213944	Cluster 2
TR4364_c0_g1	-0.854885328981403	-0.30532038368993	-0.286762730055382	1.44696844272672	Cluster 2
TR4368_c0_g1	-0.927121499046405	-0.310226835573429	-0.180916223422363	1.4182645580422	Cluster 2
TR437_c2_g1	-0.86162721885864	-0.575220034443362	0.0496727638343058	1.3871744894677	Cluster 2
TR43727_c1_g1	-0.477651332976672	-0.514951653990035	-0.507203278127356	1.49980626509406	Cluster 2
TR43735_c0_g1	-0.436561086015163	-0.985060912034213	0.0671632440023326	1.35445875404704	Cluster 2
TR43787_c0_g1	-0.949997866316115	-0.711670875463292	0.50644485556225	1.15522388621716	Cluster 2
TR4380_c0_g1	-1.11987161908608	-0.218156808912872	0.0353206262049412	1.30270780179401	Cluster 2
TR4385_c0_g1	-1.04633489272787	-0.252019911905348	-0.0575073424268703	1.35586214706008	Cluster 2
TR4385_c2_g1	-1.10581230001545	-0.586166319141005	0.879098066712418	0.812880552444035	Cluster 2
TR44049_c0_g1	-1.39124075126103	0.641175230358167	-0.0562701222088522	0.806335643111718	Cluster 2
TR44049_c1_g1	-1.04053311606861	-0.138581159927874	-0.185984884895498	1.36509916089198	Cluster 2
TR4406_c0_g1	-0.331863901800268	-1.12088426602743	0.188672403941267	1.26407576388643	Cluster 2
TR4413_c0_g1	-0.915656141929593	-0.467193661506323	-0.0111301220928293	1.39397992552875	Cluster 2
TR442_c2_g1	-0.498036334520277	-1.07203487244634	0.354838413648377	1.21523279331824	Cluster 2
TR443_c2_g1	-0.827683271978483	-0.640368262263873	0.0908767811247476	1.37717475311761	Cluster 2
TR4434_c6_g1	-0.523564654888736	-0.318953180564402	-0.643924345667756	1.48644218112089	Cluster 2
TR4436_c1_g1	-1.12707709648971	-0.519853012772567	0.596241958003309	1.05068815125897	Cluster 2
TR444_c0_g1	-0.933268763717813	-0.779920544879523	0.693461955557209	1.01972735304013	Cluster 2
TR444_c0_g2	-0.575974544189586	-0.647596475446238	-0.254329121564356	1.47790014120018	Cluster 2
TR445_c0_g1	-1.18239818161438	-0.0992337268340968	0.0200112211571519	1.26162068729132	Cluster 2
TR445_c2_g1	-0.786293649503663	-0.743181468874971	0.190378554645391	1.33909656373324	Cluster 2
TR44543_c0_g1	-0.866118717171502	-0.146661590647278	-0.419748812348172	1.43252912016695	Cluster 2
TR4458_c0_g1	-0.341573876949967	-0.676985456240139	-0.467010869313793	1.4855702025039	Cluster 2
TR4467_c0_g1	-0.430919744089113	-0.680853195660798	-0.374900177357528	1.48667311710744	Cluster 2
TR4468_c0_g1	-0.871575974773303	-0.419592905730966	-0.138870330485761	1.43003921099003	Cluster 2
TR44683_c0_g1	-1.41970970557448	0.0876045916325442	0.454513234234732	0.877591879707199	Cluster 2
TR4475_c0_g1	-1.21492837440054	-0.423750892040317	0.789764665427441	0.848914601013419	Cluster 2
TR44872_c1_g1	-0.804643351001469	0.066377498158764	-0.649597869886122	1.38786372272883	Cluster 2
TR4493_c1_g1	-1.24635887632697	-0.362765577309305	0.703691186188764	0.90543326744751	Cluster 2
TR450_c0_g1	-1.04180007961068	-0.599013845787047	0.496601590763017	1.14421233463471	Cluster 2
TR4502_c0_g1	-0.326330279703085	-0.625466369430914	-0.536362002277944	1.48815865141194	Cluster 2
TR4504_c0_g1	-0.778606006552431	-0.654869327712314	0.0320869959104029	1.40138833835434	Cluster 2
TR4514_c1_g1	-0.490832331601521	-0.508437508488233	-0.50069123065808	1.49996107074783	Cluster 2
TR4519_c2_g1	-0.264615249745872	-0.676387277723684	-0.536905342800892	1.47790787027045	Cluster 2
TR45195_c0_g2	-0.739605545470275	-0.64271398929513	-0.0452160595484012	1.42753559431381	Cluster 2
TR4528_c1_g1	-0.81245498406297	-0.116706240804625	-0.50871951119965	1.43788073606724	Cluster 2
TR4529_c0_g1	-0.893315716578594	0.106327043624213	-0.576301003949995	1.36328967690438	Cluster 2
TR45318_c0_g1	-0.120924628825097	-0.784603987027958	-0.537130328037061	1.44265894389012	Cluster 2
TR4532_c0_g1	-1.17376036757551	-0.45373671170907	0.599230213599376	1.02826686568521	Cluster 2
TR4533_c2_g1	-0.26371975614645	-0.844624725841189	-0.341050417717278	1.44939489970492	Cluster 2
TR45332_c0_g1	-1.33970322677041	0.487826718443573	-0.12377692856031	0.975653436887147	Cluster 2
TR4534_c1_g1	-0.951112419255484	-0.775393702501538	0.906485443571942	0.82002067818508	Cluster 2
TR454_c3_g1	-0.858400040337666	-0.781207346920257	0.426924412111897	1.21268297514603	Cluster 2
TR4546_c1_g2	-0.487761437774617	-0.577948294730267	-0.43156100137433	1.49727073387921	Cluster 2
TR4554_c0_g1	-1.32491795512017	-0.215148001627453	0.84877995936164	0.691285997385988	Cluster 2
TR4564_c0_g1	-0.711656905982408	-0.725737504287088	0.0353970596270449	1.40199735064245	Cluster 2
TR4567_c0_g1	-0.634184927993451	-0.477512764931239	-0.380061180251394	1.49175887317608	Cluster 2
TR4574_c0_g2	-0.645087520206219	-0.533159362622545	-0.306831447760922	1.48507833058969	Cluster 2
TR459_c0_g1	-0.88960687772574	-0.502593891531121	-0.00635512725077995	1.39855589650764	Cluster 2
TR4603_c0_g1	0.154568726530222	-0.702077227733659	-0.806364561296219	1.35387306249966	Cluster 2
TR46090_c0_g1	-0.39562500765346	-0.531267867420361	-0.568946439577833	1.49583931465165	Cluster 2
TR46169_c0_g1	-0.548589074479327	-0.454587198263324	-0.495713019107825	1.49888929185048	Cluster 2
TR4618_c0_g1	-0.000774057339167278	-0.386254612244412	-0.984600935420624	1.3716296050042	Cluster 2
TR4638_c2_g1	-0.902022823269561	-0.771287344201822	0.527230455842762	1.14607971162862	Cluster 2
TR466_c0_g2	-0.247912684811636	-0.6948538630636	-0.531440994765225	1.47420754264046	Cluster 2
TR4664_c0_g1	-1.37998104807973	-0.0908871492370327	0.788656303166552	0.682211894150207	Cluster 2
TR4671_c0_g2	-0.227743759337139	-0.576950856987417	-0.668048360722273	1.47274297704683	Cluster 2
TR4691_c0_g1	-1.49408562138587	0.619817179177546	0.41103665566511	0.463231786543219	Cluster 2
TR4693_c21_g2	-0.565719416182508	-0.243689753987758	-0.66604404171241	1.47545321188268	Cluster 2
TR46938_c0_g1	-0.74242941108431	-0.312133406809732	-0.420167781634733	1.47473059952878	Cluster 2
TR46986_c0_g1	-0.40549966614018	-0.475194921258024	-0.613680298310362	1.49437488570857	Cluster 2
TR47_c0_g1	-0.759850579753051	-0.640835569491855	-0.0176388279975719	1.41832497724248	Cluster 2
TR4703_c6_g1	-0.841540876634087	-0.577346398138732	0.0195670033952121	1.39932027137761	Cluster 2
TR4711_c0_g1	0.285155637211393	-0.828565436425558	-0.749206084560122	1.29261588377429	Cluster 2
TR4725_c0_g2	-0.432089005228136	-0.594069378139959	-0.470251920312073	1.49641030368017	Cluster 2
TR4729_c1_g1	-0.847932470982434	-0.740768809562853	0.30943507234904	1.27926620819625	Cluster 2
TR47299_c0_g1	-0.232116965748678	-0.491077390121353	-0.7437217065825	1.46691606245253	Cluster 2
TR4737_c0_g1	-0.253868764839524	-0.17060759139024	-0.974428078989411	1.39890443521918	Cluster 2
TR4747_c0_g1	-1.06615361758804	0.555717136580638	-0.588648522452083	1.09908500345948	Cluster 2
TR47512_c0_g1	-0.705242706032712	-0.0717268769229372	-0.659285964531189	1.43625554748684	Cluster 2
TR4755_c0_g1	-0.786272769070731	0.74760834666505	-0.93515964937917	0.97382407178485	Cluster 2
TR476_c1_g1	-0.653471984270843	-0.495646663170352	-0.338422581388339	1.48754122882953	Cluster 2
TR4760_c0_g1	-1.24296514801255	0.0794834519913868	-0.0394979117257811	1.20297960774694	Cluster 2
TR4762_c2_g1	-0.751790838375178	-0.447196260184047	-0.27115018065727	1.4701372792165	Cluster 2
TR4774_c0_g1	-0.192598976121567	0.707467526149518	-1.33675130951701	0.821882759489062	Cluster 2
TR47798_c0_g1	-1.05161516924602	-0.634296152761709	0.655038879466884	1.03087244254085	Cluster 2
TR4792_c0_g1	-0.0529986521821355	-0.697366445944597	-0.680598510790927	1.43096360891766	Cluster 2
TR4798_c0_g1	-0.551178743505419	-0.693788982865236	-0.226010839246677	1.47097856561733	Cluster 2
TR48334_c0_g1	-0.658320074520671	-0.201599372414189	-0.608366247727774	1.46828569466263	Cluster 2
TR48459_c0_g2	-0.539135705853092	-0.421215306457422	-0.537364007293079	1.49771501960359	Cluster 2
TR48484_c0_g2	-0.634065473267741	-0.184285039028555	-0.646559374218829	1.46490988651512	Cluster 2
TR485_c0_g1	-0.781641746268264	-0.702080116041116	0.111224582375543	1.37249727993384	Cluster 2
TR485_c2_g1	-0.710964526125557	-0.578852819447803	-0.169844192669292	1.45966153824265	Cluster 2
TR48519_c0_g1	-0.403921846491428	-0.565490585088	-0.527021837803102	1.49643426938253	Cluster 2
TR4853_c3_g1	-0.520978075556559	-0.506921331528051	-0.471779471456783	1.49967887854139	Cluster 2
TR4855_c1_g1	-0.583875768344383	-1.10792819976824	0.861456051655648	0.830347916456972	Cluster 2
TR4856_c0_g1	-1.43363325435305	0.688472836606008	0.0618803366654049	0.683280081081639	Cluster 2
TR4876_c0_g1	-0.0530538778453419	0.419378272491749	-1.35666344775945	0.990339053113045	Cluster 2
TR48762_c0_g1	-0.513046036692004	-1.15749584670156	0.806704904019053	0.86383697937451	Cluster 2
TR488_c0_g2	-0.723317506332172	-0.569498087264065	-0.165009985270152	1.45782557886639	Cluster 2
TR4881_c0_g2	-0.808808470873863	-0.920773994042191	0.831054324880943	0.898528140035111	Cluster 2
TR48890_c0_g1	-0.892409093201002	-0.663498457071614	0.25214408744594	1.30376346282668	Cluster 2
TR4894_c0_g1	0.00711027830301374	-0.846891796794109	-0.562480664673555	1.40226218316465	Cluster 2
TR4904_c0_g1	-0.909107747979204	-0.602294233970243	0.177515561043278	1.33388642090617	Cluster 2
TR4911_c0_g1	-0.850934211060228	-0.509091932558573	-0.058871498670918	1.41889764228972	Cluster 2
TR4911_c5_g1	-0.649237324269477	-0.621832739117671	-0.196331961376027	1.46740202476318	Cluster 2
TR4917_c0_g1	-0.658203424763579	-0.726842888053636	-0.0420825280885469	1.42712884090576	Cluster 2
TR4921_c0_g1	-0.909020747370383	-0.334814782446156	-0.18058361505588	1.42441914487242	Cluster 2
TR493_c3_g1	-0.467200493083189	-0.586071108633031	-0.443816109696335	1.49708771141256	Cluster 2
TR4941_c0_g1	-0.721767334166111	-0.998511958215204	0.825895210628032	0.894384081753283	Cluster 2
TR4951_c0_g1	-0.541679970101788	-0.99206213239048	0.244275071071833	1.28946703142044	Cluster 2
TR49610_c0_g2	-0.417851632297832	-0.896206210304298	-0.104167648300364	1.41822549090249	Cluster 2
TR4963_c0_g1	-1.45652631943771	0.732443169581249	0.162154256463592	0.561928893392874	Cluster 2
TR497_c0_g1	-0.287915526910437	-0.801579433154138	-0.372060958984588	1.46155591904916	Cluster 2
TR4985_c0_g2	-0.84674844497706	-0.328411780061196	-0.274006214087203	1.44916643912546	Cluster 2
TR4986_c6_g1	-0.839509171745424	-0.88986603811907	0.801467843343594	0.9279073665209	Cluster 2
TR499_c1_g1	-0.864934220789705	-0.184471447919464	-0.388323164686498	1.43772883339567	Cluster 2
TR500_c0_g1	0.0850029493469185	-0.57039910147967	-0.886375582155458	1.37177173428821	Cluster 2
TR5004_c0_g1	-0.437013327740512	-0.627850957144514	-0.428779216827141	1.49364350171217	Cluster 2
TR5017_c0_g1	-0.583746293261065	-0.236066605904221	-0.654862592947692	1.47467549211298	Cluster 2
TR50268_c0_g1	-0.477243384264311	-0.467650552419803	-0.553986039020382	1.4988799757045	Cluster 2
TR503_c3_g1	0.22068772013701	-1.1056565677216	-0.375206090350193	1.26017493793478	Cluster 2
TR5037_c0_g1	-0.928320611118799	0.544362735910491	-0.748281193890536	1.13223906909884	Cluster 2
TR50495_c0_g1	-0.524938340327386	-0.624078299843292	-0.340599978102498	1.48961661827318	Cluster 2
TR5055_c4_g1	-1.48957583171238	0.331201777106998	0.562543721920429	0.595830332684951	Cluster 2
TR5056_c0_g1	-1.01886336012627	-0.678175925735537	0.672417828252877	1.02462145760893	Cluster 2
TR5059_c0_g1	-0.162799622251571	-0.549189418221504	-0.743647027958006	1.45563606843108	Cluster 2
TR50676_c0_g1	-0.58450686993241	-0.283484237517683	-0.615119341025433	1.48311044847553	Cluster 2
TR5069_c0_g3	-1.09065115534023	-0.0049801422618275	-0.230082572496431	1.32571387009849	Cluster 2
TR508_c0_g2	-0.773605348779595	-0.68473162724878	0.0698870628401409	1.38844991318823	Cluster 2
TR5080_c0_g1	0.0809216407946176	-0.904317059643483	-0.546600870298564	1.36999628914743	Cluster 2
TR5083_c0_g1	-0.802660236935592	-0.637404521336539	0.044547824829472	1.39551693344266	Cluster 2
TR51058_c0_g1	-0.808808273190142	-0.441926169887397	-0.20178515681651	1.45251959989405	Cluster 2
TR511_c0_g1	0.486032095496254	-0.992315528304852	-0.65540691665404	1.16169034946264	Cluster 2
TR5118_c0_g1	-1.49237086583406	0.581546654123948	0.355832199326981	0.554992012383128	Cluster 2
TR5120_c0_g2	-0.835085816816093	-0.364127880194151	-0.252151867291031	1.45136556430128	Cluster 2
TR51301_c0_g1	-1.19645618942983	-0.0767172912096073	0.0233487408029241	1.24982473983652	Cluster 2
TR5132_c1_g1	-0.552852069255766	-0.545753734130211	-0.397544524132808	1.49615032751879	Cluster 2
TR514_c0_g2	-1.04246776734735	-0.669205651161597	0.83983976141794	0.871833657091005	Cluster 2
TR514_c0_g3	-0.16950330860343	0.0805035564930433	-1.17222263294729	1.26122238505768	Cluster 2
TR51407_c1_g1	-0.879989737118565	-0.655799241355796	0.21281723137054	1.32297174710382	Cluster 2
TR515_c0_g1	-0.6744722291275	-0.6128821061454	-0.1751091731844	1.4624635084573	Cluster 2
TR5152_c0_g3	-0.262360712655641	-0.738025949893278	-0.470913721638881	1.4713003841878	Cluster 2
TR5152_c0_g4	-0.495458100746879	-0.829000882655448	-0.1091922501506	1.43365123355293	Cluster 2
TR5153_c0_g1	-0.393058794146891	-1.07468222448751	0.180051472165447	1.28768954646896	Cluster 2
TR5157_c0_g1	-0.555217675030854	0.0925362791718089	-0.903589549560017	1.36627094541906	Cluster 2
TR5157_c0_g2	-0.830315038553069	-0.370216167833276	-0.252048698304149	1.45257990469049	Cluster 2
TR5163_c0_g1	-0.553876970404859	-0.713457696401621	-0.197335024672742	1.46466969147922	Cluster 2
TR51656_c0_g1	-0.812038181221247	-0.84739770516584	0.479255826122447	1.18018006026464	Cluster 2
TR5170_c0_g1	-1.1229780284711	-0.0221755146514151	-0.163201821310976	1.30835536443349	Cluster 2
TR5179_c0_g1	-1.25074740565623	0.581851891875972	-0.326373209403647	0.995268723183906	Cluster 2
TR5183_c0_g2	-0.98608276854051	0.480934713649516	-0.660868717370583	1.16601677226158	Cluster 2
TR5183_c1_g1	0.496921603091009	-1.48707707937996	0.334661487795985	0.655493988492963	Cluster 2
TR5192_c0_g1	-0.611696982209852	-0.386243244420997	-0.495690786220314	1.49363101285116	Cluster 2
TR520_c1_g1	-1.48771803905702	0.319452832992121	0.617472728307454	0.550792477757447	Cluster 2
TR52020_c0_g1	-0.869653705380324	-0.613067838624337	0.121433893477542	1.36128765052712	Cluster 2
TR5204_c0_g1	-0.34876207980384	-0.842612330349074	-0.258327718637117	1.44970212879003	Cluster 2
TR5210_c1_g3	-1.26634915002797	-0.290922164608301	0.555950733413769	1.0013205812225	Cluster 2
TR5211_c0_g1	-0.976370602963901	-0.714043259045936	0.612727730385311	1.07768613162452	Cluster 2
TR5219_c0_g1	-0.603957391173968	-0.679021777354075	-0.180443236009873	1.46342240453792	Cluster 2
TR52587_c0_g1	-0.560791616289892	-0.222200451737505	-0.687763302997038	1.47075537102443	Cluster 2
TR5262_c0_g1	-1.45118909272354	0.273344306351866	0.338249362173558	0.839595424198118	Cluster 2
TR5270_c0_g1	-1.22879612178442	0.046069868179321	-0.0365369300735882	1.21926318367869	Cluster 2
TR5270_c1_g1	-0.725937536561292	-0.38385792716482	-0.369722406115379	1.47951786984149	Cluster 2
TR5279_c0_g1	-0.398144947832697	-0.652296019348186	-0.440252817669583	1.49069378485047	Cluster 2
TR5281_c0_g1	-0.628906003837167	-0.637126997351378	-0.20278450668388	1.46881750787242	Cluster 2
TR530_c0_g2	-0.837312693188721	-0.175710473698179	-0.430218184134433	1.44324135102133	Cluster 2
TR5301_c0_g1	-0.16707537986759	-0.997389388906522	-0.22377975121659	1.3882445199907	Cluster 2
TR53017_c0_g2	-0.493406024655495	-0.809185880435012	-0.140346602568674	1.44293850765918	Cluster 2
TR53028_c1_g1	-0.562860475296206	-0.401452969290051	-0.532011259131207	1.49632470371746	Cluster 2
TR5303_c0_g1	-1.45486771388346	0.147899313379645	0.592646184819145	0.71432221568467	Cluster 2
TR53137_c0_g1	-0.75121343840828	-0.787860346494297	0.208029819170141	1.33104396573244	Cluster 2
TR5315_c0_g1	-0.59077145691136	-0.428545885219453	-0.477213556727025	1.49653089885784	Cluster 2
TR53209_c0_g1	-1.43062752592041	0.0567164265050937	0.630954324296861	0.742956775118459	Cluster 2
TR5331_c0_g1	-0.754327514987763	0.494980128563877	-0.907715852483603	1.16706323890749	Cluster 2
TR5333_c0_g1	-0.139302570143156	-0.486869378817168	-0.815520987019126	1.44169293597945	Cluster 2
TR5349_c0_g1	-0.449676078494363	-0.507698798300087	-0.541545384853426	1.49892026164788	Cluster 2
TR535_c1_g2	-0.66602771224553	-0.548336068314593	-0.264137496322274	1.4785012768824	Cluster 2
TR5359_c0_g1	-0.929008402345716	-0.321702338183716	-0.165628926589636	1.41633966711907	Cluster 2
TR53643_c0_g1	-0.121282398116292	-0.632714197401859	-0.695547247028371	1.44954384254652	Cluster 2
TR5373_c0_g1	-0.551399141520006	-0.489269660785357	-0.458204920418033	1.49887372272339	Cluster 2
TR5386_c0_g1	-0.479332103902566	-0.803294491367749	-0.165654236674373	1.44828083194469	Cluster 2
TR539_c0_g2	-0.498468659858553	-0.620418179090003	-0.373470402646317	1.49235724159487	Cluster 2
TR53993_c1_g1	-0.606448146203546	-0.509418535657796	-0.377516865026447	1.49338354688779	Cluster 2
TR5404_c0_g1	-0.553395763186173	-0.705323220478191	-0.208520435133294	1.46723941879766	Cluster 2
TR5409_c0_g1	-1.27822919682878	-0.292084047239156	0.63043883463501	0.939874409432928	Cluster 2
TR54091_c0_g1	-0.465596794015017	-0.64906616266034	-0.375592952792784	1.49025590946814	Cluster 2
TR5413_c0_g1	0.469436824309842	-1.45362397451094	0.19018776578376	0.793999384417334	Cluster 2
TR5419_c0_g1	-0.750769119307946	-0.268632980310777	-0.450661311757717	1.47006341137644	Cluster 2
TR542_c0_g2	-0.437429497037551	0.32491802267064	-1.10494069273983	1.21745216710674	Cluster 2
TR5422_c0_g1	-0.792649688122351	-0.687294369074114	0.105852278100352	1.37409177909611	Cluster 2
TR54248_c0_g1	-0.515838976564262	-0.476676824132337	-0.507272255719778	1.49978805641638	Cluster 2
TR5425_c1_g1	-0.133286614035222	-1.28642538037325	0.310135253611335	1.10957674079714	Cluster 2
TR543_c0_g3	-0.721519582286284	-0.727853752601646	0.054128364513097	1.39524497037483	Cluster 2
TR5433_c0_g1	-1.27118444249843	0.144750743715354	-0.0404017787449514	1.16683547752803	Cluster 2
TR5445_c0_g1	-0.972750480364775	-0.644798834397047	0.402721660059694	1.21482765470213	Cluster 2
TR5445_c0_g2	-0.428649569477452	-0.53473675389662	-0.53473675389662	1.49812307727069	Cluster 2
TR5452_c1_g1	-0.00340222092354305	-0.862963330724593	-0.53635012206445	1.40271567371259	Cluster 2
TR5458_c0_g2	-0.987408365841702	-0.687746706196238	0.564670107121527	1.11048496491641	Cluster 2
TR5458_c0_g3	-1.10332690360503	-0.588725011885003	0.893737391414425	0.798314524075612	Cluster 2
TR5459_c0_g1	-0.833140086332133	-0.822980782003421	0.469443602625202	1.18667726571035	Cluster 2
TR5466_c1_g1	-0.575010390768887	-0.657307591419561	-0.243493838877714	1.47581182106616	Cluster 2
TR5480_c0_g1	-1.38418759005708	0.102580506204981	0.285667232469567	0.995939851382537	Cluster 2
TR5486_c0_g1	-0.685980811769553	-0.346844230669999	-0.452030977749005	1.48485602018856	Cluster 2
TR5494_c0_g1	-0.648476929808288	-0.562176170787976	-0.269486332412484	1.48013943300875	Cluster 2
TR55_c3_g1	-0.581901069145515	-1.0634283722092	0.52521156670727	1.12011787464744	Cluster 2
TR5511_c0_g1	-1.28563283205519	0.0740946065483917	0.0545224463280621	1.15701577917874	Cluster 2
TR5544_c0_g1	-1.23404431006816	-0.304874791809791	0.453192258095635	1.08572684378232	Cluster 2
TR5549_c0_g1	0.556001480036122	-0.670405076751374	-0.999887435291297	1.11429103200655	Cluster 2
TR55506_c0_g1	-1.02348456810888	-0.656079851351847	0.6035934632437	1.07597095621703	Cluster 2
TR556_c0_g1	-1.03718277450792	-0.204327725061553	-0.124841126535788	1.36635162610526	Cluster 2
TR5577_c0_g1	-1.47065558559998	0.407808491598181	0.301160208505641	0.761686885496157	Cluster 2
TR558_c0_g1	0.0182816579401921	-0.778976985890623	-0.645208757059949	1.40590408501038	Cluster 2
TR5588_c0_g1	-0.393902012742869	-0.532062947461102	-0.569743202384257	1.49570816258823	Cluster 2
TR5594_c0_g1	-1.49984879413283	0.519823370885788	0.492496933228709	0.487528490018331	Cluster 2
TR5612_c0_g1	-0.803680116390072	-0.539805718981245	-0.0899102059056188	1.43339604127694	Cluster 2
TR56150_c2_g1	-0.196645522446099	-1.21825554172651	0.219489743264013	1.1954113209086	Cluster 2
TR5619_c0_g1	-0.895065217783992	-0.376372333661298	-0.154510747503059	1.42594829894835	Cluster 2
TR562_c0_g1	-1.02161330356986	-0.129304327341018	-0.223691030421171	1.37460866133205	Cluster 2
TR5622_c0_g1	-1.10892736182606	0.506289470673214	-0.514881049569487	1.11751894072233	Cluster 2
TR5634_c1_g1	-0.923253810602656	-0.681170593127734	0.356948128183703	1.24747627554669	Cluster 2
TR5636_c0_g1	-0.819759968516489	0.142537855750214	-0.680791135758455	1.35801324852473	Cluster 2
TR56473_c0_g1	0.0919923480717234	-0.856183464263043	-0.609492373553853	1.37368348974517	Cluster 2
TR5659_c0_g1	-0.81325083749702	0.353362487678866	-0.796703130756936	1.25659148057509	Cluster 2
TR5659_c0_g2	-0.650483698319635	-0.566743268191131	-0.261688844151578	1.47891581066234	Cluster 2
TR56593_c0_g1	-0.6413107253682	0.0248866848650347	-0.786802113809941	1.40322615431311	Cluster 2
TR566_c0_g1	-0.911452155712153	-0.331320784700378	-0.180872594797799	1.42364553521033	Cluster 2
TR5660_c1_g1	-0.182533933673652	-0.600233641747076	-0.681005693729948	1.46377326915068	Cluster 2
TR5661_c0_g1	-0.791091118317009	-0.164576092843681	-0.494390556570655	1.45005776773134	Cluster 2
TR56700_c0_g1	-0.676815912474986	0.308889505226123	-0.906638138206368	1.27456454545523	Cluster 2
TR5673_c0_g1	-0.566215300760923	-0.48244236326393	-0.449531566390112	1.49818923041496	Cluster 2
TR5719_c0_g1	0.626324287961468	-0.55428698966558	-1.1079069673099	1.03586966901402	Cluster 2
TR5724_c0_g2	-0.552548476650304	-0.491803189576698	-0.454421474454479	1.49877314068148	Cluster 2
TR5725_c0_g2	-0.509549503861486	-0.765302627545452	-0.181734240009074	1.45658637141601	Cluster 2
TR5726_c0_g1	-0.00842125205389294	-1.4113722959796	0.704873571037232	0.714919976996262	Cluster 2
TR574_c1_g1	-0.734904386173093	0.460547593481413	-0.914053174830082	1.18840996752176	Cluster 2
TR5743_c2_g1	-0.707204137180281	-0.755458812778035	0.0757962593115654	1.38686669064675	Cluster 2
TR5745_c3_g1	-0.763446197227069	-0.711894147757134	0.0965609541994552	1.37877939078475	Cluster 2
TR575_c0_g2	-1.28766753779203	-0.0441697950905357	0.189963836290136	1.14187349659243	Cluster 2
TR5752_c0_g1	-0.449594520906488	-0.718056579145854	-0.310756746408733	1.47840784646108	Cluster 2
TR57550_c0_g1	-0.752927236296914	-0.321028898054905	-0.39933121244274	1.47328734679456	Cluster 2
TR57568_c1_g1	-0.737772864224026	-0.887888228578406	0.396922683984081	1.22873840881835	Cluster 2
TR5771_c0_g2	-1.09195324181052	0.418173168411037	-0.501495174663586	1.17527524806307	Cluster 2
TR57754_c0_g1	-0.570777632736423	0.60378495901578	-1.09100630981861	1.05799898353925	Cluster 2
TR5782_c0_g1	-0.823848614301302	-0.241671286200135	-0.38789256860694	1.45341246910838	Cluster 2
TR5787_c0_g1	-0.581537347473837	-0.745181003301606	-0.119720895444549	1.44643924621999	Cluster 2
TR5800_c0_g1	-0.547492126401639	-0.468764144681099	-0.482862314445944	1.49911858552868	Cluster 2
TR5803_c0_g1	-0.682560025212354	-0.863820778795717	0.229003541357553	1.31737726265052	Cluster 2
TR5805_c0_g1	-0.874676516931521	-0.0774453166033118	-0.466190435239543	1.41831226877438	Cluster 2
TR5817_c0_g1	-0.901338470709338	-0.734261095651021	0.423555801682925	1.21204376467743	Cluster 2
TR5830_c0_g2	0.75413678601654	-0.963418764911083	-0.755940941007011	0.965222919901553	Cluster 2
TR5837_c0_g1	-0.863592460563942	-0.705386446225578	0.271756277872077	1.29722262891744	Cluster 2
TR5838_c2_g1	-0.351372031525499	-0.3382243409165	-0.778671976317967	1.46826834875997	Cluster 2
TR5856_c1_g1	-0.577439137403219	-0.480931203575383	-0.439111098916654	1.49748143989526	Cluster 2
TR5861_c0_g1	-1.30026351995566	0.559944603889227	-0.230565425130858	0.970884341197287	Cluster 2
TR587_c1_g1	-0.683320895797317	-0.614953332481903	-0.160846517278073	1.45912074555729	Cluster 2
TR5872_c0_g1	0.663737319087022	-0.877102565917311	-0.833365645514426	1.04673089234472	Cluster 2
TR5878_c1_g1	-0.950915515687085	-0.623846735737071	0.304350661827797	1.27041158959636	Cluster 2
TR5884_c0_g1	-0.364553646273125	-1.09001050543381	0.170012257310668	1.28455189439626	Cluster 2
TR5887_c0_g1	0.832319950577746	-0.87968062215962	-0.851615038999991	0.898975710581865	Cluster 2
TR58928_c0_g2	-0.175626810704618	-0.708297137676866	-0.577059520886602	1.46098346926808	Cluster 2
TR58980_c0_g1	-0.644073712387338	-0.683043676907362	-0.123206869534342	1.45032425882904	Cluster 2
TR5900_c0_g1	-0.66018699453217	-0.140401759018154	-0.654212451595228	1.45480120514555	Cluster 2
TR5900_c0_g3	-1.3248541487167	-0.220533495681067	0.804434775100506	0.74095286929726	Cluster 2
TR5914_c3_g1	-0.760218916748896	-0.659177161991132	0.00962302426264416	1.40977305447738	Cluster 2
TR5930_c0_g1	-1.45914193382562	0.163704278984996	0.597587164750109	0.697850490090512	Cluster 2
TR5930_c1_g2	-1.37462792789399	0.652569641725434	-0.0993331263513803	0.821391412519932	Cluster 2
TR5935_c0_g1	-0.907261913088491	-0.493427552990349	0.0102579338551239	1.39043153222372	Cluster 2
TR5977_c0_g1	-0.374557779412645	-0.687401162610623	-0.423826193574474	1.48578513559774	Cluster 2
TR5979_c0_g1	-1.06681480006908	-0.419941352220175	0.204706787293957	1.2820493649953	Cluster 2
TR598_c1_g1	-1.30410576425767	-0.255291791469476	0.684111413546085	0.875286142181061	Cluster 2
TR5984_c0_g1	-0.518744568057624	-1.05068616035155	0.340077163012337	1.22935356539684	Cluster 2
TR5985_c0_g1	0.0318439626549361	-0.60503529044379	-0.824404810955574	1.39759613874443	Cluster 2
TR6002_c0_g1	-0.218953276249654	-0.308178203836645	-0.902228379613185	1.42935985969948	Cluster 2
TR601_c0_g1	-0.859654717062949	-0.623369206689142	0.119931468145488	1.3630924556066	Cluster 2
TR60101_c0_g3	-0.530088815243996	-0.518689055776383	-0.450290498970707	1.49906836999109	Cluster 2
TR6017_c0_g1	-1.25764272466229	-0.0419822680221085	0.114994908060557	1.18463008462384	Cluster 2
TR6036_c0_g1	-1.13811783837577	-0.535046353221724	0.739953994676592	0.933210196920902	Cluster 2
TR6047_c0_g1	-0.782648907979872	-0.346842550973249	-0.337829877813006	1.46732133676613	Cluster 2
TR60486_c0_g1	-0.508809711818486	-0.482263118158391	-0.508809711818486	1.49988254179536	Cluster 2
TR605_c1_g2	-0.609933252479369	-0.568134400190431	-0.308541528080186	1.48660918074999	Cluster 2
TR6059_c3_g1	-0.992258164077273	-0.560323068356838	0.278190448963588	1.27439078347052	Cluster 2
TR6086_c0_g1	-0.713264023018069	0.146492910011687	-0.791132827126224	1.35790394013261	Cluster 2
TR6088_c0_g2	0.48442375400196	-1.20799693598535	-0.360812175394563	1.08438535737795	Cluster 2
TR6089_c0_g1	-0.65949135724948	-0.912805918312194	0.28825450051964	1.28404277504203	Cluster 2
TR610_c0_g1	0.0732073049764518	-0.0546417636567755	-1.23228780509353	1.21372226377385	Cluster 2
TR6100_c0_g1	-1.48080982736175	0.269024129642105	0.588343144300832	0.623442553418816	Cluster 2
TR6105_c9_g1	-0.642956307041197	-0.496407678470009	-0.349859049898821	1.48922303541003	Cluster 2
TR61089_c1_g1	-1.06761104234644	-0.452102455411141	0.259334284628738	1.26037921312884	Cluster 2
TR6127_c0_g1	0.0953677718533641	-0.842446062000607	-0.626992372397649	1.37407066254489	Cluster 2
TR6136_c0_g2	-0.777278127861102	0.284804199521625	-0.801011811154571	1.29348573949405	Cluster 2
TR6139_c0_g2	-1.41815587941226	0.123119642264088	0.387598873794348	0.907437363353827	Cluster 2
TR6145_c0_g1	-0.737536336462822	-0.619998056511141	-0.079583892477033	1.437118285451	Cluster 2
TR6194_c3_g1	-0.00642723076935669	-0.836825446170221	-0.564310861549504	1.40756353848908	Cluster 2
TR6196_c0_g1	-0.537474087351198	-0.570172130688152	-0.387608055390154	1.4952542734295	Cluster 2
TR6197_c0_g1	-0.541070582870016	-0.499714869529633	-0.45835915618925	1.4991446085889	Cluster 2
TR6200_c0_g1	-0.891996592445148	0.381911838655278	-0.726892498373469	1.23697725216334	Cluster 2
TR6211_c1_g1	-0.413857803277571	-0.321889402549222	-0.739927587678083	1.47567479350488	Cluster 2
TR6212_c0_g1	-0.61686604752797	-0.344719261853866	-0.528742326452545	1.49032763583438	Cluster 2
TR62447_c1_g1	-0.610312838218496	-0.626282463181348	-0.239229184476418	1.47582448587626	Cluster 2
TR6258_c0_g1	-0.689440187784812	-0.679350050117713	-0.0660588700392949	1.43484910794182	Cluster 2
TR6259_c3_g1	-0.595212556600679	-0.362374586800964	-0.535090076135964	1.49267721953761	Cluster 2
TR6272_c0_g2	-0.717334195124538	-0.603139738053143	-0.130278183419479	1.45075211659716	Cluster 2
TR6279_c0_g1	-0.784267881982684	-0.582232104986781	-0.0624941174605971	1.42899410443006	Cluster 2
TR6300_c0_g1	-0.610964254307151	-0.71171911779205	-0.127782171755483	1.45046554385468	Cluster 2
TR6301_c0_g1	-1.06783518536424	-0.541281191987095	0.435698506568096	1.17341787078324	Cluster 2
TR6310_c1_g1	-0.328503301283985	-0.607403539980929	-0.553120943187564	1.48902778445248	Cluster 2
TR6318_c0_g1	0.145697014434988	-0.95719550181126	-0.525186912498214	1.33668539987449	Cluster 2
TR6319_c0_g1	-1.09249416105824	-0.101746869186045	-0.138745730708243	1.33298676095253	Cluster 2
TR6324_c0_g1	-1.26300854340832	0.565181905269478	-0.299892439530743	0.997719077669588	Cluster 2
TR6329_c0_g1	-0.539765639704372	-0.503347717025523	-0.456004417543019	1.49911777427291	Cluster 2
TR6345_c0_g1	-0.616905810859323	-0.970214907372193	0.336048519421469	1.25107219881005	Cluster 2
TR6349_c0_g1	-0.539614726833536	-0.460742903179426	-0.498864284612246	1.49922191462521	Cluster 2
TR635_c0_g1	-0.33424101867666	-0.607821974280455	-0.547569025724857	1.48963201868197	Cluster 2
TR6350_c0_g1	-0.272391488841011	-0.583696047516451	-0.62520332200651	1.48129085836397	Cluster 2
TR6377_c0_g1	-0.319196985992523	-0.74450685237046	-0.411039883474742	1.47474372183773	Cluster 2
TR640_c2_g1	0.426627005735763	-0.269012770679971	-1.24782388465357	1.09020964959778	Cluster 2
TR6403_c1_g1	-0.118307371334337	-0.823934702936362	-0.494079695334884	1.43632176960558	Cluster 2
TR6411_c1_g2	-0.300530489658728	-0.727600132857973	-0.448159502122664	1.47629012463936	Cluster 2
TR6414_c0_g1	-0.744699034507188	-0.450022427304343	-0.277060070902674	1.47178153271421	Cluster 2
TR6415_c0_g1	-0.85769435853926	-0.85297576917785	0.663506257896642	1.04716386982047	Cluster 2
TR642_c1_g1	-0.664174875639831	-0.524155379551529	-0.294110864130548	1.48244111932191	Cluster 2
TR6429_c1_g1	-0.449443796174791	-0.831949154621421	-0.160826116619606	1.44221906741582	Cluster 2
TR64356_c0_g1	-0.845959100938961	-0.429307207726216	-0.164519088675126	1.4397853973403	Cluster 2
TR6442_c0_g1	-0.884649506701041	-0.356357955543296	-0.192009190972472	1.43301665321681	Cluster 2
TR6443_c0_g2	-0.729444386629392	-0.399030991607331	-0.35008085901147	1.47855623724819	Cluster 2
TR6443_c0_g3	-0.71930194608336	-0.1452272337698	-0.589451713536245	1.4539808933894	Cluster 2
TR645_c0_g1	-0.632558546766909	-0.480614489932726	-0.378641339490533	1.49181437619017	Cluster 2
TR64598_c0_g2	-0.603312593838123	-0.583033178919194	-0.299121370054195	1.48546714281151	Cluster 2
TR64863_c0_g1	-0.397117178573608	-0.46938803471177	-0.626595773321585	1.49310098660696	Cluster 2
TR6496_c0_g1	-0.695085610098478	-0.689449607731513	-0.0436149728625324	1.42815019069252	Cluster 2
TR6500_c0_g1	-0.748833692738581	0.122989317518395	-0.74260638552246	1.36845076074265	Cluster 2
TR65026_c0_g1	-0.593071723239966	-0.425096129576969	-0.4781410538916	1.49630890670853	Cluster 2
TR6504_c0_g1	-0.68129196705118	-0.597543524718934	-0.185528580912194	1.46436407268231	Cluster 2
TR6508_c0_g2	-0.609100839852675	-1.02034089733282	0.453915912501675	1.17552582468382	Cluster 2
TR6516_c1_g1	0.198754044739627	-0.472884005622684	-1.02468024317659	1.29881020405964	Cluster 2
TR65223_c0_g2	-0.708808666702648	-0.495965271035564	-0.271074135991098	1.47584807372931	Cluster 2
TR654_c10_g1	-0.672359139005586	-0.581294378081027	-0.217035334382795	1.47068885146941	Cluster 2
TR654_c8_g1	-0.293033983273433	-0.52511220008638	-0.664171212589684	1.4823173959495	Cluster 2
TR65450_c0_g1	-1.32285342265049	-0.223689942780871	0.818677855758095	0.727865509673261	Cluster 2
TR65509_c0_g1	-0.73485235773287	-0.52797310159693	-0.200414279381692	1.46323973871149	Cluster 2
TR6553_c0_g1	-0.467914116976018	-0.21502411733869	-0.776926763591682	1.45986499790639	Cluster 2
TR6556_c0_g1	-0.421255052038655	-0.571880630567211	-0.504016358922477	1.49715204152834	Cluster 2
TR6569_c0_g1	0.0557803927779772	-0.708410988280313	-0.741879223947099	1.39450981944943	Cluster 2
TR6584_c1_g1	0.606224607943181	-0.99942075552502	-0.685543715524532	1.07873986310637	Cluster 2
TR6595_c0_g1	-0.689348235057004	-0.503993338867041	-0.286153563963372	1.47949513788742	Cluster 2
TR661_c8_g1	-0.523988854685921	-0.50127406689658	-0.474429317690996	1.4996922392735	Cluster 2
TR6614_c1_g1	0.0789986455433557	-0.58023143105982	-0.874433283428179	1.37566606894464	Cluster 2
TR6617_c0_g1	-0.652312065094672	-0.162489286973041	-0.645247313487149	1.46004866555486	Cluster 2
TR6645_c0_g1	-0.471469691476566	-0.853170260891356	-0.103343570762387	1.42798352313031	Cluster 2
TR6650_c0_g1	-0.634018206431594	-0.728092766484757	-0.0740036787852762	1.43611465170163	Cluster 2
TR6654_c0_g1	-0.563927061534528	-0.515940262184948	-0.417337249822798	1.49720457354227	Cluster 2
TR6661_c0_g1	-0.236134678687526	-0.851801179743864	-0.357939202277809	1.4458750607092	Cluster 2
TR6675_c0_g1	-0.553737308508451	-0.539665687344431	-0.403132930644889	1.49653592649777	Cluster 2
TR6685_c0_g1	-0.706300667245865	-1.00176716958227	0.714653077205905	0.993414759622233	Cluster 2
TR6689_c1_g1	-0.953289826255697	-0.515379957394013	0.123136667035595	1.34553311661411	Cluster 2
TR6689_c1_g2	-0.758771467499215	-0.372409105584524	-0.341546024528797	1.47272659761254	Cluster 2
TR6699_c0_g1	-0.45522563330663	-0.457087285334239	-0.584920724563364	1.49723364320423	Cluster 2
TR672_c0_g1	-0.910846287572161	-0.29603999497585	-0.219488238699267	1.42637452124728	Cluster 2
TR672_c0_g2	-0.70273583614844	-0.585556752144893	-0.172381947276894	1.46067453557023	Cluster 2
TR672_c2_g1	-0.634455996152633	-0.534259056277026	-0.318162671022918	1.48687772345258	Cluster 2
TR6754_c1_g1	0.733320014026634	-0.296737091404429	-1.28573853996422	0.849155617342014	Cluster 2
TR6759_c2_g1	-0.659606066038621	-0.254146657961429	-0.563627752049334	1.47738047604938	Cluster 2
TR6763_c0_g1	-0.407717150668153	-0.637135975508948	-0.447616076727421	1.49246920290452	Cluster 2
TR6768_c0_g1	-0.0438604796777561	-0.699026394864238	-0.68531999496494	1.42820686950693	Cluster 2
TR67862_c0_g1	0.579478475977785	-0.14726669796805	-1.34506862200868	0.912856843998946	Cluster 2
TR679_c0_g1	-0.301850579493913	-0.575381081735537	-0.608536294128461	1.48576795535791	Cluster 2
TR68039_c1_g1	-0.885538420856629	-0.320077147872605	-0.229843966013453	1.43545953474269	Cluster 2
TR6806_c2_g1	-0.465688631666656	-0.557996623244234	-0.475023147668883	1.49870840257977	Cluster 2
TR6806_c3_g1	-0.697053258076496	0.10163560516357	-0.780837850435133	1.37625550334806	Cluster 2
TR68064_c7_g1	-0.82483839797755	-0.858300401952298	0.553052565693759	1.13008623423609	Cluster 2
TR6809_c0_g1	-1.25921451370282	0.745794727138122	-0.345938053215059	0.859357839779755	Cluster 2
TR682_c0_g1	-1.29054984483303	-0.274793883310455	0.65263547286233	0.912708255281154	Cluster 2
TR68318_c0_g1	-0.172071946147858	-0.243933410247921	-0.980348597401779	1.39635395379756	Cluster 2
TR6895_c0_g1	-0.180948386755946	-0.758027025599231	-0.518392675571087	1.45736808792626	Cluster 2
TR69028_c0_g1	0.585825042251783	-0.877963345260161	-0.813961314212388	1.10609961722077	Cluster 2
TR6909_c0_g1	-0.662559732353666	-0.939272347846106	0.356028947088333	1.24580313311144	Cluster 2
TR6932_c1_g1	-1.45450132449637	0.139311425151179	0.648763523093715	0.666426376251478	Cluster 2
TR6944_c0_g2	0.125003013194348	-1.26139404223388	-0.0431828591035018	1.17957388814303	Cluster 2
TR6944_c1_g1	-0.783451458311884	-0.703498182679569	0.11666364397874	1.37028599701271	Cluster 2
TR6946_c1_g1	-0.541684519640435	-0.485801474237904	-0.471830712887272	1.49931670676561	Cluster 2
TR6955_c0_g1	-0.349140817934674	-0.762299751946737	-0.360617454990564	1.47205802487197	Cluster 2
TR6957_c0_g1	0.398449177144001	-0.727443910565653	-0.898033772339843	1.2270285057615	Cluster 2
TR69589_c0_g1	-0.245248466644956	-0.598123958220431	-0.633411507377979	1.47678393224337	Cluster 2
TR696_c3_g1	-0.426583110330209	-0.583979511445076	-0.486277152827107	1.49683977460239	Cluster 2
TR69715_c0_g1	-1.35423424616072	-0.154642582651699	0.797916201222023	0.710960627590397	Cluster 2
TR6977_c0_g1	-0.628098251881305	-1.0232643321526	0.513492646680213	1.13786993735369	Cluster 2
TR6995_c0_g2	-0.530073684077618	-0.762325043295761	-0.160874109596361	1.45327283696974	Cluster 2
TR701_c0_g2	-0.611541435070305	-0.499209366960824	-0.38268733916345	1.49343814119458	Cluster 2
TR701_c7_g3	-0.206478007623237	-0.255951074875795	-0.948814176932252	1.41124325943128	Cluster 2
TR7019_c0_g1	0.685656503989818	-1.02250251803045	-0.676453060983243	1.01329907502388	Cluster 2
TR7033_c1_g1	-0.481011951283096	-0.749089158700131	-0.236688420472635	1.46678953045586	Cluster 2
TR7033_c5_g1	-0.518635759321952	-0.398372394841499	-0.578767441562178	1.49577559572563	Cluster 2
TR7040_c0_g1	-0.729004186335227	-0.497128155982818	-0.244172486507462	1.47030482882551	Cluster 2
TR7054_c0_g1	-0.584653284451565	-0.563149728534887	-0.343245439726596	1.49104845271305	Cluster 2
TR7061_c0_g1	-0.34192460998274	-0.786134359703906	-0.338417690905993	1.46647666059264	Cluster 2
TR7064_c0_g1	-0.757358549892852	-0.563989356721352	-0.125247126462477	1.44659503307668	Cluster 2
TR709_c0_g1	-0.739006815658735	-0.484458755069717	-0.245802823128883	1.46926839385733	Cluster 2
TR7090_c0_g1	-0.717644541703987	-0.693637316891906	-0.00428700443072881	1.41556886302662	Cluster 2
TR7099_c0_g1	-0.243043343009611	-0.166647592664525	-0.984531508123678	1.39422244379781	Cluster 2
TR71159_c0_g2	-0.509013075693194	-0.912054145866645	0.0399566578189197	1.38111056374092	Cluster 2
TR7119_c0_g2	0.625890358533803	-0.219196932235124	-1.31634136553898	0.909647939240297	Cluster 2
TR7123_c1_g2	-0.866452434305879	-0.675098826729521	0.220634008735671	1.32091725229973	Cluster 2
TR713_c0_g1	-0.0536045227839122	-0.699639834986394	-0.677878206411343	1.43112256418165	Cluster 2
TR714_c5_g1	-0.898122287516664	-0.516530049639097	0.026902606752036	1.38774973040372	Cluster 2
TR7148_c0_g1	-0.367245058677536	-0.971059020184159	-0.0473137805658176	1.38561785942751	Cluster 2
TR7153_c0_g1	-0.455245562571393	-0.740234923799983	-0.276964546643006	1.47244503301438	Cluster 2
TR71540_c0_g1	-0.5	-0.5	-0.5	1.5	Cluster 2
TR7156_c0_g1	-0.148686555353165	-1.30319392633068	0.39008355110301	1.06179693058084	Cluster 2
TR7160_c0_g1	-0.472955572968551	-0.00335429484374867	-0.915722492343365	1.39203236015566	Cluster 2
TR7162_c0_g1	-0.602181031329237	-0.353436971329186	-0.536059192595046	1.49167719525347	Cluster 2
TR71660_c1_g1	-0.281037373792709	-0.453983449972838	-0.738109146554478	1.47312997032002	Cluster 2
TR71670_c0_g1	-0.796980714304375	-0.78146770769991	0.28505149635704	1.29339692564725	Cluster 2
TR71792_c0_g1	-0.43950191696047	-0.711194011081489	-0.329911828575522	1.48060775661748	Cluster 2
TR7182_c0_g1	-0.788770258540693	-0.478330558392147	-0.186897370497594	1.45399818743043	Cluster 2
TR7183_c0_g2	-0.507237439210292	-0.497923209263049	-0.494818465947301	1.49997911442064	Cluster 2
TR7190_c3_g1	-0.845094612965693	-0.850498895062995	0.597848707014099	1.09774480101459	Cluster 2
TR7194_c1_g1	-1.05215545023784	-0.656750828012036	0.881535647496568	0.827370630753307	Cluster 2
TR720_c0_g1	-0.117668466993495	-0.758008724819612	-0.569179684176262	1.44485687598937	Cluster 2
TR720_c1_g1	-0.369110604176445	0.0107899341407182	-1.00393815790619	1.36225882794191	Cluster 2
TR7210_c0_g2	-0.837149443752448	-0.0962875184389262	-0.496156703293575	1.42959366548495	Cluster 2
TR7221_c0_g1	-0.380839257665786	-0.0926013263502424	-0.932534483667935	1.40597506768396	Cluster 2
TR72316_c0_g1	0.110698870811625	-1.42715370573311	0.452738495594851	0.863716339326632	Cluster 2
TR72344_c0_g1	-0.626717451538743	-0.590201095991031	-0.262873764334432	1.47979231186421	Cluster 2
TR7253_c0_g1	-0.724892225583362	-0.606349459958164	-0.115650358872917	1.44689204441444	Cluster 2
TR72646_c0_g1	-0.257612277857909	-0.229594024072759	-0.931606938356244	1.41881324028691	Cluster 2
TR72733_c2_g1	0.20730862047074	-0.0414617240941479	-1.29567887794212	1.12983198156553	Cluster 2
TR728_c1_g1	-0.375673960153937	-0.77781351493903	-0.314493754383214	1.46798122947618	Cluster 2
TR73_c4_g1	0.0324860411015723	-0.458541907584141	-0.948419907912277	1.37447577439485	Cluster 2
TR7312_c1_g1	-0.72945721365789	-0.60628831004171	-0.109365492004021	1.44511101570362	Cluster 2
TR7335_c0_g1	0.0635720093613472	-0.830845740843968	-0.61918402181428	1.3864577532969	Cluster 2
TR7341_c0_g1	-0.507682554494137	-0.394691439762415	-0.592685044475799	1.49505903873235	Cluster 2
TR7348_c1_g2	-1.38421326688111	0.0520338859417714	0.354725631043905	0.977453749895429	Cluster 2
TR7352_c0_g1	0.624580546583636	0.0211722219180891	-1.41853886851199	0.772786100010261	Cluster 2
TR7353_c1_g2	-0.405323524387042	-0.652421268171272	-0.4330650513556	1.49080984391391	Cluster 2
TR7365_c0_g1	-0.511037907311474	-0.536589802677048	-0.451416818125135	1.49904452811366	Cluster 2
TR737_c0_g1	-1.43360848405636	0.417332448070203	0.151632862652035	0.864643173334123	Cluster 2
TR7378_c0_g1	-0.820820584574062	-0.740785924400173	0.252512454967228	1.30909405400701	Cluster 2
TR738_c0_g1	-1.01431176644207	-0.491300336401228	0.206746660056976	1.29886544278632	Cluster 2
TR73877_c1_g1	-0.281337537016224	-0.988760227357114	-0.118817232428281	1.38891499680162	Cluster 2
TR7392_c0_g1	-0.552185328007871	-0.602933213732883	-0.33469438918639	1.48981293092714	Cluster 2
TR74_c2_g1	-0.758041191523774	-0.348309551237904	-0.366620265014824	1.4729710077765	Cluster 2
TR741_c1_g1	-0.845018983882829	-0.509932375566664	-0.0668244264117349	1.42177578586123	Cluster 2
TR741_c1_g3	-0.913661128024239	-0.709826523206982	0.397308322045255	1.22617932918597	Cluster 2
TR7419_c0_g1	-0.714390987163204	-1.00220318343039	0.781204532725231	0.935389637868369	Cluster 2
TR74252_c0_g1	-0.518683306865625	-0.462099673389375	-0.518683306865625	1.49946628712063	Cluster 2
TR7437_c0_g1	0.272881914960512	0.101888332753174	-1.38005604637709	1.0052857986634	Cluster 2
TR745_c0_g3	-0.85083815855354	-0.711361557450908	0.256788315983527	1.30541140002092	Cluster 2
TR74502_c0_g1	-0.507383259581311	-1.15840255303443	0.751515494626231	0.914270317989512	Cluster 2
TR74650_c0_g1	-0.539173353583953	-0.496607036195746	-0.463499900449363	1.49928029022906	Cluster 2
TR7480_c4_g1	-0.465570430755941	-0.516994383659951	-0.516994383659951	1.49955919807584	Cluster 2
TR7482_c0_g1	-0.839957606268025	-0.395927153615324	-0.210914465010033	1.44679922489338	Cluster 2
TR7487_c0_g1	-0.447815919445622	-0.873354701781766	-0.102292976523112	1.4234635977505	Cluster 2
TR74899_c0_g1	-0.724769509449802	-0.180880514406577	-0.555116061454668	1.46076608531105	Cluster 2
TR7493_c1_g1	-0.794018939230237	-0.667783813756431	0.0770034265390213	1.38479932644765	Cluster 2
TR74990_c0_g1	-0.499547859922209	-0.642147965650974	-0.347401303600724	1.48909712917391	Cluster 2
TR7516_c0_g1	0.778022393459243	-0.222292112416927	-1.32449050315085	0.768760222108538	Cluster 2
TR7526_c0_g1	-0.989695914822339	-0.564864038876728	0.280740809741129	1.27381914395794	Cluster 2
TR7534_c0_g1	-0.616631514893758	-0.895741193302591	0.175765091043441	1.33660761715291	Cluster 2
TR7556_c0_g1	-1.0089208407532	0.0969331532432031	-0.426282170259683	1.33826985776968	Cluster 2
TR7556_c1_g1	-0.800847976762834	0.0950704841629922	-0.67193884569437	1.37771633829421	Cluster 2
TR7581_c0_g1	-0.300054752487844	0.0574121554693929	-1.07810216194373	1.32074475896218	Cluster 2
TR7595_c2_g1	0.105550414862454	-0.310945816756961	-1.09544214343737	1.30083754533187	Cluster 2
TR7617_c0_g1	-0.179840539589283	-1.20627925753452	0.167758229435998	1.21836156768781	Cluster 2
TR762_c0_g2	-0.416431618146253	-0.40049165190142	-0.671471078063575	1.48839434811125	Cluster 2
TR7661_c0_g1	-0.433277488266393	-0.549643442257938	-0.515290727116817	1.49821165764115	Cluster 2
TR76754_c0_g2	-0.784092310292844	-0.482270876416598	-0.188638396172654	1.4550015828821	Cluster 2
TR76788_c0_g2	-0.72865899884551	-0.649656280674457	-0.0514928430936323	1.4298081226136	Cluster 2
TR7681_c0_g2	-0.523037490351476	-0.366906896216707	-0.602837571798135	1.49278195836632	Cluster 2
TR76843_c0_g1	-0.588390540750291	-0.473379358563973	-0.435042297835201	1.49681219714947	Cluster 2
TR7692_c0_g1	-1.35027317035635	0.643083849209064	-0.152936266581798	0.86012558772908	Cluster 2
TR7698_c0_g1	-0.908974306603165	-0.0490519112823828	-0.446311834754519	1.40433805264007	Cluster 2
TR7705_c2_g1	-0.419058791259513	-0.560526118484946	-0.517780595150643	1.4973655048951	Cluster 2
TR7712_c0_g1	-0.50472637241198	-0.209020512589943	-0.749210732953942	1.46295761795586	Cluster 2
TR7712_c0_g3	-0.542201069860167	-0.256161518194734	-0.678248022780803	1.4766106108357	Cluster 2
TR7739_c0_g1	-0.411032796053152	-0.606160453080582	-0.477882085960697	1.49507533509443	Cluster 2
TR7739_c1_g1	-0.757973857413758	0.14288555660403	-0.745046116578155	1.36013441738788	Cluster 2
TR7748_c0_g1	-0.819733479398294	-0.00621010211665388	-0.583749598965452	1.4096931804804	Cluster 2
TR7756_c0_g1	-0.810807338977509	-0.887596891972593	0.612057907696114	1.08634632325399	Cluster 2
TR7760_c0_g1	-0.694007423409504	-0.585606510248316	-0.1838169770319	1.46343091068972	Cluster 2
TR7763_c1_g1	0.545658731924893	-0.076858728182833	-1.37160327359116	0.902803269849105	Cluster 2
TR7770_c0_g2	-0.649252320280699	-0.850163593691528	0.144906647862593	1.35450926610963	Cluster 2
TR778_c1_g1	-0.442668858312065	-0.366235133274784	-0.677849550734466	1.48675354232131	Cluster 2
TR7784_c0_g1	-0.525488436880089	-0.553947408167828	-0.417991140788673	1.49742698583659	Cluster 2
TR77938_c0_g1	-0.826231687908902	-0.760074443077984	0.302518543536617	1.28378758745027	Cluster 2
TR78193_c1_g1	-0.759041377278251	-0.872832929578909	0.409420248532877	1.22245405832428	Cluster 2
TR782_c1_g1	-0.785729222913744	-0.142248542660487	-0.518819230139885	1.44679699571412	Cluster 2
TR7875_c0_g3	-0.935623431367235	-0.793379239966712	0.849786419315195	0.879216252018752	Cluster 2
TR7879_c0_g1	-0.84296494790608	-0.662057150423974	0.153117744254434	1.35190435407562	Cluster 2
TR790_c2_g1	-1.00282952132994	-0.389962361502028	0.0359689229954767	1.35682295983649	Cluster 2
TR7901_c3_g1	-0.34356132793212	-0.694930867862697	-0.445068083912064	1.48356027970688	Cluster 2
TR7908_c1_g1	-0.74330480719022	-0.940844074518456	0.573623641664685	1.11052524004399	Cluster 2
TR791_c0_g2	-0.624850107310763	-0.561012607169924	-0.299170657439699	1.48503337192039	Cluster 2
TR7913_c0_g2	-0.840798390528897	-0.500656052331247	-0.085133735563176	1.42658817842332	Cluster 2
TR7924_c0_g1	-0.209419392011268	-0.800507892406707	-0.445129530205768	1.45505681462374	Cluster 2
TR79317_c0_g1	-0.540420716794668	-0.416601173089923	-0.540420716794668	1.49744260667926	Cluster 2
TR797_c5_g1	-1.08609507302475	-0.499164106310869	0.395950024723809	1.18930915461181	Cluster 2
TR7974_c0_g1	-1.3618324288729	-0.104813119186965	0.561709744375216	0.904935803684645	Cluster 2
TR7993_c0_g1	-0.798928639666723	-0.403315449659439	-0.258050304643633	1.4602943939698	Cluster 2
TR8014_c0_g1	-0.737801717362873	-0.598477658059086	-0.107956902305835	1.44423627772779	Cluster 2
TR8021_c0_g1	-0.188982941274326	-0.563603993003964	-0.710776549040607	1.4633634833189	Cluster 2
TR8038_c1_g1	-0.673990168892617	-0.40924771302645	-0.404835338762014	1.48807322068108	Cluster 2
TR8045_c0_g2	-0.257293181476613	-0.39153310224702	-0.809168411310508	1.45799469503414	Cluster 2
TR8054_c1_g1	-0.788910626798422	-0.676472542383891	0.0821798606138727	1.38320330856844	Cluster 2
TR806_c1_g3	-1.46151640614855	0.271992414933651	0.391653332646865	0.797870658568035	Cluster 2
TR8064_c0_g1	-0.783763624022715	-0.734708717256001	0.170577289438799	1.34789505183992	Cluster 2
TR8074_c0_g1	-1.30620258726523	0.395650995867356	-0.145866030408753	1.05641762180663	Cluster 2
TR809_c0_g1	-0.95914532945288	-0.735503671071639	0.620215529347976	1.07443347117654	Cluster 2
TR8117_c0_g1	-0.655670477436262	-0.685473680956092	-0.104311212319405	1.44545537071176	Cluster 2
TR812_c0_g1	-0.560082250512774	-0.484724923573976	-0.453695436010941	1.49850261009769	Cluster 2
TR8169_c0_g1	-0.735061316395209	-0.673324001188431	-0.00803800931029157	1.41642332689393	Cluster 2
TR817_c4_g1	-0.975174801097962	-0.68888495123434	0.52387066277128	1.14018908956102	Cluster 2
TR8171_c0_g1	-1.4158114642827	0.0108328431649718	0.637766500763082	0.767212120354642	Cluster 2
TR818_c1_g1	-0.566543565275838	-0.433509043875034	-0.497732605930595	1.49778521508147	Cluster 2
TR81829_c0_g2	-0.73734194602731	-0.45288515466652	-0.283209173854821	1.47343627454865	Cluster 2
TR8183_c2_g2	-0.459443660293642	-0.912639220039319	-0.0262420223014502	1.39832490263441	Cluster 2
TR8200_c0_g1	-0.829475274524737	-0.38009965789753	-0.242549320564388	1.45212425298665	Cluster 2
TR8215_c0_g1	-0.644349927217681	-0.830699600669638	0.102361088234174	1.37268843965315	Cluster 2
TR8223_c1_g1	-0.36892128583509	-1.0591611109459	0.113056523078495	1.3150258737025	Cluster 2
TR8224_c0_g1	-0.912478321644749	-0.452775027711518	-0.0351545360138724	1.40040788537014	Cluster 2
TR8224_c3_g1	-0.279516761922147	-0.593360143729469	-0.609706153198601	1.48258305885022	Cluster 2
TR8226_c0_g1	0.135712240445836	0.246864354647597	-1.38448940227319	1.00191280717976	Cluster 2
TR8232_c0_g1	-0.539167354067953	-0.4759464032591	-0.484296340158383	1.49941009748544	Cluster 2
TR8238_c0_g1	-1.01694112329904	0.639792451740722	-0.673219087904787	1.0503677594631	Cluster 2
TR8240_c0_g1	-0.655008382233494	-0.419668533480705	-0.415913110362309	1.49059002607651	Cluster 2
TR8258_c0_g1	0.376935146415377	-0.643721760206219	-0.963865696755229	1.23065231054607	Cluster 2
TR8260_c0_g1	-0.488890319026982	-0.861813153768115	-0.0683096140313899	1.41901308682649	Cluster 2
TR8267_c0_g1	-0.752971834457493	-0.906520608386634	0.487477161210903	1.17201528163322	Cluster 2
TR828_c0_g1	-0.951665106613291	-0.775359486195351	0.893878560075277	0.833146032733364	Cluster 2
TR8302_c0_g1	-0.516476726851727	-0.446043171966279	-0.536353680991179	1.49887357980918	Cluster 2
TR8309_c0_g1	-0.698614431743279	-0.383827555795374	-0.401852162189119	1.48429414972777	Cluster 2
TR831_c1_g1	-0.901533647506167	-0.319393192850307	-0.208039449707902	1.42896629006438	Cluster 2
TR8330_c0_g1	-0.921054008697194	-0.472529314708271	0.00493245631219497	1.38865086709327	Cluster 2
TR8341_c1_g1	-0.728813973491879	-0.472337171298745	-0.272449556778117	1.47360070156874	Cluster 2
TR8377_c1_g1	-0.878801592619923	-0.571760755424582	0.0738474334995489	1.37671491454496	Cluster 2
TR8401_c0_g3	-0.765503300244725	-0.571627087519428	-0.103862256817124	1.44099264458128	Cluster 2
TR84051_c0_g1	0.255761911493944	-0.729349757178903	-0.833367759461129	1.30695560514609	Cluster 2
TR84124_c0_g1	-0.623415781738513	-0.349077666220295	-0.517901121923814	1.49039456988262	Cluster 2
TR8419_c1_g1	-0.369611485293693	-0.287703122901739	-0.803725805971049	1.46104041416648	Cluster 2
TR8423_c0_g1	-1.11701444785293	0.496838314358913	-0.50019620262856	1.12037233612258	Cluster 2
TR84285_c0_g1	-1.11255191951958	0.499807978686902	-0.507474649746406	1.12021859057908	Cluster 2
TR8443_c0_g1	-1.11872259254786	-0.29113439038333	0.12620050203567	1.28365648089552	Cluster 2
TR8446_c0_g2	-0.648501925005689	-0.597476726552647	-0.22737395377325	1.47335260533159	Cluster 2
TR845_c1_g2	-0.416073648479282	-0.599058917967553	-0.480554172013244	1.49568673846008	Cluster 2
TR845_c5_g1	-0.482638064403564	0.140511050401414	-0.988417345934595	1.33054435993675	Cluster 2
TR8462_c0_g1	-0.632777371168515	-0.850430064865977	0.118542984960225	1.36466445107427	Cluster 2
TR849_c0_g2	-1.09694640664824	-0.541985349235664	0.536701124186243	1.10223063169766	Cluster 2
TR8491_c0_g2	-0.721755594661393	-0.106390271046973	-0.61666398419997	1.44480984990834	Cluster 2
TR851_c3_g1	-1.34912895346132	0.68781703228577	-0.163354195423977	0.824666116599528	Cluster 2
TR8513_c0_g1	-0.910437515921837	-0.820425155954282	0.859805563440087	0.871057108436032	Cluster 2
TR8523_c0_g1	-0.66777850815343	-0.613131378032938	-0.183491872258033	1.4644017584444	Cluster 2
TR8525_c0_g1	-0.689391080376555	-0.955188687455735	0.461711734777723	1.18286803305457	Cluster 2
TR8556_c1_g1	0.549363684750127	-1.39573128860361	-0.0195151089959898	0.865882712849469	Cluster 2
TR8557_c0_g1	-0.863728768651235	-0.812502680230404	0.530759193915833	1.14547225496581	Cluster 2
TR8570_c0_g1	-0.677917451176681	-0.24147698408517	-0.555062293719428	1.47445672898128	Cluster 2
TR86_c0_g1	-0.979692905479448	-0.721924559989422	0.662028779822367	1.0395886856465	Cluster 2
TR86_c3_g2	-1.17848202357102	-0.248220370051846	0.197683228043406	1.22901916557946	Cluster 2
TR8607_c0_g1	-0.34566349916034	-0.230303008509489	-0.865621652673596	1.44158816034343	Cluster 2
TR8607_c0_g2	-0.491628798411702	-0.205590224790348	-0.763365443351988	1.46058446655404	Cluster 2
TR8608_c1_g2	-0.259789761203163	-0.839986894556893	-0.35071617762427	1.45049283338433	Cluster 2
TR8611_c0_g1	-0.762326056085916	0.291035809589451	-0.818655567619358	1.28994581411582	Cluster 2
TR8618_c0_g1	-0.367852023287363	-0.727986871261004	-0.383286373914804	1.47912526846317	Cluster 2
TR862_c0_g3	-0.868117627849449	-0.568234788177239	0.0503712671026915	1.385981148924	Cluster 2
TR862_c9_g1	-0.338345241310035	-0.586543134589369	-0.565607463236174	1.49049583913558	Cluster 2
TR8640_c0_g1	-1.00661184243927	-0.708031230505269	0.769503709432859	0.945139363511685	Cluster 2
TR865_c0_g1	-0.654804472677279	-0.661556390239536	-0.137800499338781	1.4541613622556	Cluster 2
TR8667_c1_g2	-1.49860011476375	0.454391235748819	0.486465911213441	0.55774296780149	Cluster 2
TR868_c0_g2	-0.933763396650539	-0.378939203847462	-0.0929473518871134	1.40564995238511	Cluster 2
TR8687_c0_g1	-0.765238443071831	-0.287368022925709	-0.416522190532769	1.46912865653031	Cluster 2
TR87_c0_g1	0.251680936389055	-0.476321772174327	-1.04624389259252	1.27088472837779	Cluster 2
TR87_c1_g1	-0.682025431202409	-0.104926989415755	-0.658708322443352	1.44566074306152	Cluster 2
TR8710_c0_g1	-0.519251564941376	0.189615264243158	-0.984114793408472	1.31375109410669	Cluster 2
TR8720_c1_g2	-0.53560045489191	-0.461468904041819	-0.502241257009369	1.4993106159431	Cluster 2
TR8727_c0_g1	-0.300169684914408	-0.421208770706286	-0.75113087760726	1.47250933322795	Cluster 2
TR8727_c2_g1	0.0407903303461827	-0.271446442951215	-1.08842687233087	1.3190829849359	Cluster 2
TR8739_c0_g1	-0.296957871910066	-0.657381674228352	-0.528882753401833	1.48322229954025	Cluster 2
TR875_c1_g1	-0.931848419045791	-0.661569378584256	0.336005988937408	1.25741180869264	Cluster 2
TR8782_c0_g1	-0.650469353017019	-0.510547648398761	-0.325651110153207	1.48666811156899	Cluster 2
TR88_c0_g1	-1.27947460003966	-0.199621894001253	0.400997934698475	1.07809855934244	Cluster 2
TR88_c1_g1	-1.28858386389582	0.367772245408683	-0.164233359734784	1.08504497822192	Cluster 2
TR88063_c0_g1	-0.651537748270431	-0.550483072853319	-0.279341769498229	1.48136259062198	Cluster 2
TR88063_c0_g2	-0.656166278928615	-0.47281117298289	-0.35979487923186	1.48877233114337	Cluster 2
TR8821_c0_g1	-0.686306966481	0.384925295193553	-0.929910804412823	1.23129247570027	Cluster 2
TR885_c0_g1	-1.39267149497866	0.0436304313034104	0.401934218170603	0.947106845504648	Cluster 2
TR887_c2_g2	-0.777359150614487	0.325067313036133	-0.81974127392842	1.27203311150677	Cluster 2
TR8876_c0_g1	-0.49395717293768	-1.1706784998623	0.83478762226468	0.829848050535304	Cluster 2
TR888_c3_g1	-1.10146631111177	-0.590995756382665	0.897621969084839	0.794840098409593	Cluster 2
TR8898_c0_g1	-0.0365828103334967	-0.723653716909483	-0.665349862940473	1.42558639018345	Cluster 2
TR89_c2_g1	-0.614095316984042	-0.6262166161103	-0.234698654332169	1.47501058742651	Cluster 2
TR891_c1_g1	-0.687719310967299	-0.701642146305552	-0.0366119003339252	1.42597335760678	Cluster 2
TR8925_c0_g1	-0.338568198568698	-1.05547025674559	0.0646892091558058	1.32934924615849	Cluster 2
TR8955_c0_g3	0.382583663093124	0.350677519848057	-1.47609420885588	0.742833025914701	Cluster 2
TR89643_c0_g2	-0.81005738830759	-0.291480368423034	-0.358118768079697	1.45965652481032	Cluster 2
TR8989_c0_g1	-0.69722267376569	-0.681784771001203	-0.0515156103119295	1.43052305507882	Cluster 2
TR8994_c0_g1	-0.931814643574921	-0.797373724850181	0.843732662341471	0.885455706083632	Cluster 2
TR9_c7_g1	-0.585007929653215	-0.522221729366754	-0.387679871610052	1.49490953063002	Cluster 2
TR901_c3_g1	-0.723952831323177	-0.38552062078462	-0.370412039957006	1.4798854920648	Cluster 2
TR902_c3_g1	-1.05987442016919	-0.247937889243662	-0.0389165131612441	1.34672882257409	Cluster 2
TR9046_c0_g1	-0.529749884633476	-0.524563522126575	-0.444545357734385	1.49885876449444	Cluster 2
TR9054_c0_g1	-1.00459368920125	0.0876320664410699	-0.425460032721138	1.34242165548132	Cluster 2
TR908_c0_g1	-0.822761497802082	-0.446220878267642	-0.177540926522422	1.44652330259215	Cluster 2
TR910_c1_g1	-0.944941942295452	0.637245497326361	-0.755454903734887	1.06315134870398	Cluster 2
TR913_c0_g1	-1.00450914308069	-0.636028706014682	0.473320333661834	1.16721751543354	Cluster 2
TR913_c0_g2	-0.945771583900105	-0.688525972112584	0.432451594484692	1.201845961528	Cluster 2
TR9130_c0_g1	-0.718668885239463	-0.492345223602147	-0.262776778285442	1.47379088712705	Cluster 2
TR9134_c1_g1	-0.700223330948046	0.235570963052957	-0.850781081439192	1.31543344933428	Cluster 2
TR9147_c1_g3	-0.658168330576732	-0.272688257776702	-0.549265888485243	1.48012247683868	Cluster 2
TR9159_c0_g1	-0.692819825326535	-0.484273691633174	-0.303839118647355	1.48093263560706	Cluster 2
TR9166_c0_g1	-1.46131859599268	0.168437535208443	0.660689022796459	0.63219203798778	Cluster 2
TR9167_c0_g1	0.154068414578701	-1.06380571971008	-0.390935500937792	1.30067280606917	Cluster 2
TR9183_c0_g1	-0.55073165884668	-0.571398223587922	-0.371836707805308	1.49396659023991	Cluster 2
TR919_c0_g1	-0.168165061326977	-0.292929377723318	-0.948352447739623	1.40944688678992	Cluster 2
TR919_c1_g1	-0.774384233640547	-0.601316036379081	-0.0512278265802519	1.42692809659988	Cluster 2
TR9234_c0_g1	-0.686819628687634	-0.792732142665614	0.105221780191166	1.37432999116208	Cluster 2
TR9266_c0_g1	-0.812121807537003	-0.0172791873944044	-0.5843507009744	1.41375169590581	Cluster 2
TR927_c1_g1	-0.778810875720985	-0.502949589909023	-0.171228252623682	1.45298871825369	Cluster 2
TR928_c7_g1	-0.707710404323918	0.311689535554559	-0.879853043238308	1.27587391200767	Cluster 2
TR929_c0_g2	-1.30573255665314	0.22068391741119	-0.0309283045476169	1.11597694378957	Cluster 2
TR93_c0_g1	-0.730615785855416	-0.678005412017812	-0.00786999444701861	1.41649119232025	Cluster 2
TR9305_c0_g1	-0.746529080628756	0.882261640743076	-0.977563225504193	0.841830665389874	Cluster 2
TR9308_c0_g1	0.103618361725487	-1.2902102413208	0.0362409048399491	1.15035097475537	Cluster 2
TR9312_c0_g1	-0.494440571160713	-0.333264697369785	-0.658974275655621	1.48667954418612	Cluster 2
TR9332_c0_g1	-1.40270744838515	0.563003300689744	-0.00611011334081896	0.84581426103622	Cluster 2
TR9333_c0_g1	-0.672623088765064	-0.771018237750125	0.046891438188193	1.396749888327	Cluster 2
TR9341_c0_g1	-0.64162231765984	-0.58617347539294	-0.249519790201049	1.47731558325383	Cluster 2
TR9356_c0_g1	-0.702191275196314	-0.482756501697465	-0.294042596488456	1.47899037338224	Cluster 2
TR936_c0_g1	-0.646145102490414	-0.620859589709253	-0.201476525299235	1.4684812174989	Cluster 2
TR9372_c0_g3	-0.578897426739838	-0.496197794348433	-0.421814326108118	1.49690954719639	Cluster 2
TR9374_c0_g2	0.599355075984198	-0.488277687384809	-1.15011379445616	1.03903640585678	Cluster 2
TR9383_c0_g1	-0.269584629042496	-0.841164623428102	-0.33985837504009	1.45060762751069	Cluster 2
TR9417_c0_g1	-0.822904788603574	0.819086204897757	-0.906913630131549	0.910732213837367	Cluster 2
TR945_c0_g1	-1.32914385331455	0.224272411973671	0.0173151494538496	1.08755629188703	Cluster 2
TR9455_c0_g1	-0.802188531954323	-0.197512719697145	-0.453506859192884	1.45320811084435	Cluster 2
TR946_c0_g1	-0.364668623731994	-0.557950544384977	-0.570701782205834	1.49332095032281	Cluster 2
TR9481_c0_g1	0.212285236604221	-1.44629814638747	0.391437486147942	0.842575423635311	Cluster 2
TR94987_c0_g1	-0.468241228576674	-0.229654313338836	-0.765610427278905	1.46350596919442	Cluster 2
TR9506_c0_g1	-0.690719079302416	-0.598005108926253	-0.172611597788563	1.46133578601723	Cluster 2
TR9514_c0_g1	-0.439342424471823	0.716168324513089	-1.20043104674886	0.923605146707598	Cluster 2
TR9578_c0_g1	-0.0568391298252035	-1.39423041982999	0.718847818377574	0.732221731277622	Cluster 2
TR959_c0_g1	-1.2702300884773	-0.0326750639199895	0.133443433203528	1.16946171919376	Cluster 2
TR9597_c0_g1	-0.490007561528905	-0.0751922612956503	-0.856371838374627	1.42157166119918	Cluster 2
TR96_c3_g1	-0.726444579893507	-0.445211720407631	-0.305147594002253	1.47680389430339	Cluster 2
TR961_c0_g1	-0.699077581427896	-0.441476671889647	-0.34239939899032	1.48295365230786	Cluster 2
TR961_c1_g1	0.212259153068001	-0.536180164054498	-0.981497948700451	1.30541895968695	Cluster 2
TR9649_c0_g1	-0.32909854942108	-0.312275620377191	-0.816963491693864	1.45833766149214	Cluster 2
TR966_c1_g1	-1.19863060551079	0.251564448070165	-0.251564448070165	1.19863060551079	Cluster 2
TR967_c2_g1	-0.666427639324969	-0.64187838363691	-0.148353691701113	1.45665971466299	Cluster 2
TR9699_c0_g1	-1.0878131290627	-0.588378069773809	0.656897674872241	1.01929352396427	Cluster 2
TR9705_c0_g1	-0.479208486545371	-0.582392094414354	-0.435553883216186	1.49715446417591	Cluster 2
TR9709_c0_g1	-0.706684042164978	-0.577352130184657	-0.17739869921875	1.46143487156838	Cluster 2
TR973_c2_g1	-0.563651602863775	-0.39698126044393	-0.535384065641503	1.49601692894921	Cluster 2
TR9730_c0_g1	-0.255315223365105	-0.642870639344956	-0.580023815132007	1.47820967784207	Cluster 2
TR9741_c0_g1	-0.566431764701901	-0.52071428984908	-0.409597579783071	1.49674363433405	Cluster 2
TR9756_c0_g1	-0.871879216548987	-0.845120775120373	0.697949347263	1.01905064440636	Cluster 2
TR9788_c0_g1	-0.433521714444246	-0.640227860921438	-0.418556563568069	1.49230613893375	Cluster 2
TR979_c2_g2	-1.14398904819539	0.121923895228151	-0.248610442613652	1.27067559558089	Cluster 2
TR9861_c0_g1	-0.466884377100306	-0.85718476378732	-0.10303853528697	1.42710767617459	Cluster 2
TR9910_c0_g1	-1.33301091885649	-0.110618155504175	0.431286516403917	1.01234255795675	Cluster 2
TR99133_c0_g1	-1.15702593703884	-0.387497113538278	0.373287064240683	1.17123598633643	Cluster 2
TR9926_c0_g1	-0.90727919354694	-0.791645570839977	0.618195136779533	1.08072962760738	Cluster 2
TR9940_c0_g1	-1.04750367048227	-0.662544083152414	0.883657234552619	0.826390519082063	Cluster 2
TR99432_c0_g1	-0.331836436305973	-0.694782538515631	-0.456275099920713	1.48289407474232	Cluster 2
TR9957_c0_g1	0.364850987304648	-0.506616686781782	-1.06933084360206	1.2110965430792	Cluster 2
TR9961_c0_g1	-0.444563009447355	-0.54622502847749	-0.507893447531701	1.49868148545655	Cluster 2
TR9961_c1_g1	0.122391682247567	-1.44739313297629	0.584209689756607	0.740791760972118	Cluster 2
TR9976_c0_g1	-0.714270880883836	0.56117512666631	-0.963447418782705	1.11654317300023	Cluster 2
TR9981_c0_g1	-0.783055258434638	-0.624134633654013	-0.00604888191206524	1.41323877400072	Cluster 2

## Sheet: Cluster 3
Gene	G	T	P	C	Cluster
TR0_c1_g1	1.23830067342929	-0.853555102801124	0.383839220638467	-0.768584791266635	Cluster 3
TR10_c0_g1	0.785913853776027	0.179912450746655	0.487540530109763	-1.45336683463245	Cluster 3
TR10_c8_g1	1.30863228889404	0.232990911969265	-0.620985500095862	-0.920637700767445	Cluster 3
TR10003_c0_g1	1.47958559185232	-0.535191973960652	-0.274135739280593	-0.670257878611071	Cluster 3
TR1002_c0_g3	1.30454366376011	0.262152636126287	-0.750384710525183	-0.816311589361212	Cluster 3
TR100274_c0_g1	1.07175437473296	0.630362358386753	-0.799168238467885	-0.902948494651825	Cluster 3
TR10033_c0_g1	1.47380170015877	-0.653262163391759	-0.230666693812184	-0.589872842954823	Cluster 3
TR1004_c0_g1	1.05475372963606	-0.431498392742098	0.556439177883537	-1.17969451477749	Cluster 3
TR10042_c0_g1	1.48005782029998	-0.345443683430681	-0.414954040314308	-0.719660096554994	Cluster 3
TR10051_c0_g1	1.46848197509551	-0.354307487162649	-0.336480695355724	-0.777693792577136	Cluster 3
TR10059_c0_g1	1.43235361442762	-0.665569024262943	-0.0582756288525158	-0.708508961312165	Cluster 3
TR10070_c0_g1	1.48633085116544	-0.412857391262355	-0.685391936378565	-0.388081523524517	Cluster 3
TR10088_c0_g2	1.00068341295998	-0.245276465622924	0.531458870029165	-1.28686581736622	Cluster 3
TR1009_c0_g1	1.23712734326865	-0.187636280855657	0.139932141655066	-1.18942320406806	Cluster 3
TR10099_c0_g1	1.49997310610984	-0.494119150045579	-0.4976422812402	-0.508211674824062	Cluster 3
TR100994_c0_g1	1.45068352549511	-0.596564760403215	-0.131366667839382	-0.722752097252514	Cluster 3
TR1010_c2_g1	1.49881914735734	-0.550335645901463	-0.453488870226066	-0.494994631229808	Cluster 3
TR10105_c1_g1	0.974150971164803	0.63967027376596	-0.394816991755131	-1.21900425317563	Cluster 3
TR10119_c0_g2	1.40677985934656	-0.828800537289446	3.63218462889649e-16	-0.577979322057114	Cluster 3
TR10120_c0_g1	1.47477015410529	-0.463981249731513	-0.282990216778394	-0.727798687595382	Cluster 3
TR10124_c0_g1	1.44190235578551	-0.662881999995571	-0.0911239407001998	-0.687896415089744	Cluster 3
TR101336_c0_g1	1.49192280147471	-0.553184858973767	-0.352026728437852	-0.586711214063087	Cluster 3
TR10136_c2_g1	1.43202151206614	-0.561877142902287	-0.0779777617257389	-0.792166607438114	Cluster 3
TR1014_c1_g3	1.43156776679878	-0.719952341954961	-0.0565719375398852	-0.655043487303935	Cluster 3
TR10152_c0_g2	1.37303890677554	-0.870367035820426	0.0884330143346956	-0.591104885289808	Cluster 3
TR101588_c0_g1	1.47602397872275	-0.486416992988177	-0.276754496010515	-0.712852489724053	Cluster 3
TR1016_c0_g1	1.25003266932676	0.350725699706377	-0.671545704461008	-0.929212664572134	Cluster 3
TR1016_c2_g1	1.49140510959891	-0.524945918606677	-0.611917002948786	-0.354542188043446	Cluster 3
TR1016_c2_g3	1.48715712715453	-0.623079502950473	-0.54784153623109	-0.316236087972964	Cluster 3
TR101632_c0_g3	1.48138340563619	-0.714048116385788	-0.408534991962018	-0.358800297288381	Cluster 3
TR10186_c1_g1	1.47571466329246	-0.268503525626626	-0.499940907984929	-0.707270229680909	Cluster 3
TR1019_c1_g1	1.48946132065543	-0.34957018449834	-0.500556234473117	-0.639334901683976	Cluster 3
TR10196_c0_g1	1.11738026993623	0.00943505656158441	0.183758958747053	-1.31057428524487	Cluster 3
TR102_c0_g1	1.18054421640829	0.335699919345068	-0.34331923661016	-1.17292489914319	Cluster 3
TR10200_c0_g1	1.49602369433915	-0.539738543837769	-0.396427320441705	-0.559857830059678	Cluster 3
TR10224_c0_g1	1.48935228014775	-0.527373894730719	-0.337801634292143	-0.624176751124885	Cluster 3
TR102257_c0_g1	1.11951433234295	-0.818050553947605	0.567613691293547	-0.869077469688892	Cluster 3
TR102328_c0_g1	1.47221690875119	-0.57027526935419	-0.226678454345808	-0.675263185051195	Cluster 3
TR10237_c0_g1	1.456007357883	-0.336520274393812	-0.295006867233008	-0.824480216256182	Cluster 3
TR1026_c0_g2	1.33819037503499	0.104346913898297	-0.44028703764679	-1.00225025128649	Cluster 3
TR10267_c0_g1	1.29535159303738	-1.14392316737245	-0.0437865327223904	-0.107641892942543	Cluster 3
TR1027_c0_g1	1.47864355412087	-0.538968112811395	-0.267808458257856	-0.671866983051618	Cluster 3
TR10270_c1_g1	1.05974914327544	-0.504972673268073	0.579363154473606	-1.13413962448098	Cluster 3
TR10284_c0_g1	1.29205509109095	-1.11399282910689	-0.281073487925253	0.103011225941192	Cluster 3
TR10288_c0_g2	1.3970764388609	-0.660327972904118	0.044387951054539	-0.781136417011316	Cluster 3
TR10289_c1_g1	1.27394519001974	-0.306276480340407	0.154549152375882	-1.12221786205521	Cluster 3
TR102892_c0_g2	1.48070956811976	-0.600609101928096	-0.267598114720439	-0.612502351471227	Cluster 3
TR10294_c0_g1	0.918798124150954	-0.298536929929174	-1.27820180678413	0.657940612562355	Cluster 3
TR103074_c0_g1	1.49559355613774	-0.537440936433238	-0.391529369980775	-0.56662324972373	Cluster 3
TR10316_c2_g1	1.49997225496326	-0.506897382659019	-0.492097459077733	-0.500977413226504	Cluster 3
TR10324_c0_g1	0.96833644984742	-0.928731687072474	0.754470730862714	-0.794075493637659	Cluster 3
TR103246_c0_g1	1.48088315339367	-0.478809624955926	-0.306549295668107	-0.695524232769633	Cluster 3
TR10345_c0_g1	1.36588523308945	-0.473278628049858	0.0596569699222513	-0.952263574961845	Cluster 3
TR1035_c0_g2	0.873489912545951	0.427484036928765	0.126689376628802	-1.42766332610352	Cluster 3
TR103502_c0_g1	1.46557823018499	-0.669617639653487	-0.189514426317025	-0.606446164214479	Cluster 3
TR103510_c0_g2	1.48518120316085	-0.603073579465316	-0.297036240632171	-0.585071383063366	Cluster 3
TR10353_c0_g1	1.48938832718831	-0.341910487249789	-0.630602497806114	-0.51687534213241	Cluster 3
TR10370_c0_g1	1.18558057338847	-0.835140386017916	0.471129299902875	-0.821569487273433	Cluster 3
TR1038_c1_g2	0.920233942479538	0.567601923253776	-0.142183038521157	-1.34565282721216	Cluster 3
TR103914_c0_g1	1.42727126606231	-0.885990745998757	-0.145291086964426	-0.395989433099123	Cluster 3
TR104_c0_g1	0.548106424201515	0.25999382066833	0.669604747177273	-1.47770499204712	Cluster 3
TR10403_c0_g1	1.38998334720552	-0.701269999698818	0.0673493163031421	-0.756062663809849	Cluster 3
TR104048_c0_g2	1.46144497432482	-0.610032586880331	-0.171160222218222	-0.680252165226268	Cluster 3
TR10420_c0_g1	1.48297620520693	-0.354624744723396	-0.425549693668075	-0.702801766815458	Cluster 3
TR1043_c3_g1	1.47783664703441	-0.365469587130847	-0.37764699645618	-0.734720063447383	Cluster 3
TR104356_c0_g1	1.47544882563237	-0.551779807006713	-0.247349568658182	-0.676319449967475	Cluster 3
TR104360_c0_g1	1.49643453574782	-0.415787850872213	-0.496133329301626	-0.584513355573981	Cluster 3
TR10449_c1_g1	1.15299424816274	0.519112264869593	-0.796325277061859	-0.87578123597047	Cluster 3
TR1045_c3_g1	1.47323086558587	-0.23494624579029	-0.55702677857502	-0.681257841220559	Cluster 3
TR104597_c0_g1	1.48790646204805	-0.580460953678029	-0.316845498732548	-0.59060000963747	Cluster 3
TR10462_c0_g1	1.45189150426683	-0.194831029065218	-0.449712717773825	-0.807347757427786	Cluster 3
TR10462_c2_g1	1.47878914743035	-0.571875490607831	-0.259943404821741	-0.646970252000778	Cluster 3
TR10468_c0_g1	1.45547731079573	-0.553863551820597	-0.160662709688418	-0.740951049286714	Cluster 3
TR104715_c0_g1	1.47592294370869	-0.590369177483476	-0.241514663515967	-0.644039102709246	Cluster 3
TR1048_c0_g1	0.775123967718222	-0.342439649805084	0.829676498005665	-1.2623608159188	Cluster 3
TR10480_c0_g1	1.35294223677204	-0.553992134445383	0.12181152353769	-0.920761625864345	Cluster 3
TR10483_c0_g1	1.44260282961828	-0.643669183121219	-0.0949675843949339	-0.703966062102129	Cluster 3
TR10495_c0_g1	1.41793578144622	-0.587511240121145	-0.028245732698132	-0.802178808626947	Cluster 3
TR104955_c0_g2	1.35775905482796	-1.00999515522625	0.0209644904015217	-0.368728390003235	Cluster 3
TR10501_c0_g1	1.36398149558313	-0.854709099258314	0.119093415678025	-0.628365812002841	Cluster 3
TR10518_c0_g1	1.48770773271953	-0.65200550670934	-0.496640122226037	-0.339062103784149	Cluster 3
TR10521_c0_g1	0.691371740104026	0.43168602237801	0.361786591967734	-1.48484435444977	Cluster 3
TR10525_c0_g1	1.34844755493864	-0.382774865418389	0.0505072229058287	-1.01617991242608	Cluster 3
TR105293_c0_g1	1.47443665656583	-0.577979169373806	-0.235909865050533	-0.660547622141492	Cluster 3
TR1053_c0_g1	1.39313512297635	-0.31082276422388	-0.107068793349102	-0.975243565403366	Cluster 3
TR105442_c0_g1	1.4190294478724	-0.643701394492311	-0.0192640093036932	-0.756064044076396	Cluster 3
TR105521_c3_g1	1.47186126506785	-0.60606052091029	-0.218996658816323	-0.646804085341234	Cluster 3
TR1056_c4_g1	1.48961130268854	-0.341622149743471	-0.626018254098442	-0.521970898846623	Cluster 3
TR105796_c0_g2	1.49819125767608	-0.523340781790961	-0.430986526180791	-0.543863949704332	Cluster 3
TR1058_c3_g1	1.43477607613202	-0.463595100070958	-0.128588421917492	-0.842592554143567	Cluster 3
TR105838_c0_g1	1.4953670693248	-0.399492224359765	-0.504277070093473	-0.591597774871564	Cluster 3
TR105866_c0_g1	1.49677735740395	-0.527954195157031	-0.408212006564714	-0.560611155682208	Cluster 3
TR1059_c1_g1	1.08953417172623	0.223200117770636	0.0149976363719399	-1.3277319258688	Cluster 3
TR1059_c5_g1	1.48926301210422	-0.413250992887558	-0.410690722022019	-0.66532129719464	Cluster 3
TR10590_c0_g1	1.3879758667943	-0.594053670987961	0.0532982732849011	-0.847220469091242	Cluster 3
TR10590_c0_g2	1.37698132678367	-0.643688604911768	0.0920083553925025	-0.825301077264406	Cluster 3
TR10591_c0_g2	1.37380524530223	-0.565233678332158	0.0785579010563337	-0.887129468026403	Cluster 3
TR106041_c0_g1	1.19691531500407	-0.804338898492253	0.453086315297471	-0.845662731809286	Cluster 3
TR10606_c2_g1	1.4891712189521	-0.491967234953433	-0.351752702716761	-0.645451281281903	Cluster 3
TR10609_c0_g1	1.14875018064503	0.524449272047221	-0.88917243443857	-0.784027018253676	Cluster 3
TR10612_c0_g1	0.972965558022136	-0.657639493962408	-1.04398494181937	0.728658877759643	Cluster 3
TR106182_c0_g1	1.44453691890355	-0.540775359384406	-0.125933987801848	-0.777827571717297	Cluster 3
TR106215_c0_g2	1.45698041918743	-0.631449299872974	-0.150345071398327	-0.675186047916124	Cluster 3
TR10625_c0_g1	1.18268783525921	-0.818511909902863	0.47555011612067	-0.839726041477019	Cluster 3
TR1063_c4_g1	1.46337315524729	-0.204918755449603	-0.518111102996789	-0.740343296800899	Cluster 3
TR1064_c0_g1	1.41226663671123	-0.757412499624042	-0.657133211810227	0.0022790747230412	Cluster 3
TR10642_c0_g1	1.3875325894583	-0.735521311239433	0.0747451315956655	-0.726756409814534	Cluster 3
TR10651_c0_g1	1.40703950477099	-0.0308832200344817	-0.497837506955845	-0.878318777780659	Cluster 3
TR10663_c0_g1	1.47342154758276	-0.633818207619402	-0.226363645578358	-0.613239694385006	Cluster 3
TR10666_c0_g1	1.4262729097896	-0.769676685334027	-0.0474208384329023	-0.609175386022666	Cluster 3
TR10670_c1_g1	1.47427915661631	-0.682129162016504	-0.242045831683276	-0.550104162916535	Cluster 3
TR10673_c0_g1	1.01289520569799	0.704689309354623	-0.824093580454538	-0.893490934598078	Cluster 3
TR10675_c0_g1	1.49167875150231	-0.544915086938078	-0.351354515516058	-0.59540914904817	Cluster 3
TR10676_c0_g1	1.47860005245635	-0.518987333790065	-0.274909132255133	-0.68470358641115	Cluster 3
TR1068_c1_g1	1.42948238679725	-0.0921567979713268	-0.504547948710597	-0.832777640115323	Cluster 3
TR10688_c0_g1	1.46836557840632	-0.759436105904957	-0.443540071526111	-0.265389400975251	Cluster 3
TR10693_c0_g1	1.17191122249356	-0.27480147488545	0.309305695947301	-1.20641544355541	Cluster 3
TR10700_c0_g3	1.4941557361424	-0.569131276015175	-0.373762297958684	-0.551262162168544	Cluster 3
TR10709_c0_g1	1.49885965773254	-0.550214304737262	-0.493295583557545	-0.455349769437734	Cluster 3
TR107215_c0_g1	1.46464401892713	-0.544010635601506	-0.200424971011081	-0.720208412314544	Cluster 3
TR10727_c0_g1	1.34477260452489	0.154615498140492	-0.602048616850495	-0.897339485814885	Cluster 3
TR10736_c0_g1	1.49383785465189	-0.512434424872932	-0.380513062517251	-0.600890367261712	Cluster 3
TR10737_c0_g1	1.46252107985626	-0.469292478371458	-0.225003243054808	-0.768225358429989	Cluster 3
TR10743_c0_g1	1.44966034642343	-0.606120029236773	-0.125693093620529	-0.717847223566132	Cluster 3
TR10749_c0_g1	1.4992423538511	-0.480660512270293	-0.544528346661305	-0.474053494919498	Cluster 3
TR1075_c0_g2	1.45622101014924	-0.796321293131718	-0.447335865862838	-0.212563851154682	Cluster 3
TR10753_c1_g3	1.40503774478456	-0.0248924576387179	-0.499220875873527	-0.880924411272319	Cluster 3
TR10769_c0_g1	0.997440153778082	-0.0497693327713338	0.407526081919811	-1.35519690292656	Cluster 3
TR10769_c0_g2	1.49892701396879	-0.53048763100264	-0.522056584245742	-0.446382798720412	Cluster 3
TR10781_c0_g1	1.03732526758012	0.159983108759698	0.169977069366717	-1.36728544570653	Cluster 3
TR107817_c1_g3	1.47920253189983	-0.587853131901043	-0.259749058281856	-0.631600341716934	Cluster 3
TR10793_c0_g1	1.48191986024684	-0.395838359999155	-0.373572452249202	-0.712509047998479	Cluster 3
TR10799_c0_g1	1.485268926003	-0.602446931263558	-0.297628913535934	-0.585193081203504	Cluster 3
TR10800_c0_g2	0.853004276057604	-1.27748890160756	-0.312310931725916	0.736795557275867	Cluster 3
TR10810_c0_g1	1.44877519316693	-0.170714777065467	-0.472916254764336	-0.805144161337131	Cluster 3
TR10811_c0_g1	1.44383098628211	-0.649239436784572	-0.0988394366448154	-0.69575211285272	Cluster 3
TR108123_c0_g1	1.49970407023112	-0.502210369938827	-0.522991488694916	-0.474502211597374	Cluster 3
TR10823_c0_g1	1.49850414375922	-0.53107257465056	-0.436358994458103	-0.53107257465056	Cluster 3
TR10827_c0_g1	1.49925692824651	-0.456654403832882	-0.511673006704313	-0.530929517709314	Cluster 3
TR10837_c0_g1	1.49977130940207	-0.523257434668868	-0.48125683790615	-0.495257036827056	Cluster 3
TR108536_c0_g2	1.47038252879414	-0.529337710365891	-0.230736950672311	-0.710307867755939	Cluster 3
TR108536_c0_g3	1.48623876580066	-0.626181815032764	-0.309318727907751	-0.550738222860142	Cluster 3
TR10870_c0_g1	1.4038669395997	-0.698000042886838	0.0297083672436261	-0.73557526395649	Cluster 3
TR108722_c0_g1	1.4898348878305	-0.372067346768176	-0.465997392235598	-0.651770148826721	Cluster 3
TR10873_c0_g2	1.46592251329371	-0.240096387586149	-0.467826770508248	-0.75799935519931	Cluster 3
TR10876_c0_g1	1.46950098292799	-0.328973836149371	-0.367850641448976	-0.77267650532964	Cluster 3
TR1089_c3_g1	0.950601470170367	-0.901852676828297	0.776197390173037	-0.824946183515107	Cluster 3
TR1089_c5_g1	1.49888818616939	-0.51132719235917	-0.447735141720305	-0.53982585208992	Cluster 3
TR10891_c0_g1	1.48397080296275	-0.459636974368994	-0.336191615538464	-0.688142213055294	Cluster 3
TR10891_c0_g2	1.3783972220234	-0.867381666541557	-0.584978333248957	0.0739627777671096	Cluster 3
TR10906_c0_g1	1.48174797744422	-0.698608970137771	-0.461265578867507	-0.321873428438939	Cluster 3
TR109100_c0_g1	1.48335114797325	-0.649732321013078	-0.294218409515356	-0.539400417444819	Cluster 3
TR10929_c0_g1	1.44713788079383	-0.762157919110968	-0.129994702829832	-0.554985258853031	Cluster 3
TR10935_c1_g1	1.35702773768075	-1.0474908322263	-0.236414419093473	-0.0731224863609795	Cluster 3
TR109465_c0_g1	1.5	-0.5	-0.5	-0.5	Cluster 3
TR10950_c0_g1	1.08298712800649	0.582807925448049	-1.05654593668181	-0.609249116772725	Cluster 3
TR109617_c0_g1	1.48344758640427	-0.535391114431323	-0.296075888496405	-0.651980583476539	Cluster 3
TR1098_c1_g1	1.19738775649148	0.438352307787289	-0.68317215554422	-0.952567908734551	Cluster 3
TR10980_c0_g1	1.4982880616429	-0.510787467330262	-0.436086028875291	-0.551414565437351	Cluster 3
TR10991_c0_g3	1.47626968989728	-0.574104879404499	-0.246044948316214	-0.65611986217657	Cluster 3
TR10992_c0_g1	1.36010456138894	-0.611801428155715	0.123761982602669	-0.872065115835896	Cluster 3
TR11_c3_g1	1.37943071713259	-0.914335302926967	-0.509138540550855	0.0440431263452297	Cluster 3
TR11000_c0_g2	0.889174197934748	0.352712805356539	0.189556732220056	-1.43144373551134	Cluster 3
TR1101_c1_g1	0.980274299796218	0.713992255491913	-0.6303294768556	-1.06393707843253	Cluster 3
TR1101_c3_g1	1.49842716732772	-0.541241218065812	-0.52143861238238	-0.435747336879527	Cluster 3
TR11035_c0_g1	1.49672389605531	-0.458794762107406	-0.445901232493146	-0.592027901454756	Cluster 3
TR11038_c0_g1	1.20849876597232	0.424206045257048	-0.931932385509564	-0.700772425719801	Cluster 3
TR1104_c1_g1	0.997149356119399	0.692349075323499	-0.622102135608819	-1.06739629583408	Cluster 3
TR11045_c2_g1	1.48466216284923	-0.566256346741359	-0.295805554267874	-0.622600261840002	Cluster 3
TR11047_c0_g1	1.42807000076287	-0.0530971349007824	-0.766611575136133	-0.608361290725958	Cluster 3
TR11052_c0_g1	1.47040153821044	-0.603523019414733	-0.212147485612451	-0.654731033183255	Cluster 3
TR11065_c0_g2	1.01875804252123	0.694727826749568	-0.781018482036587	-0.932467387234212	Cluster 3
TR1107_c0_g1	1.41758350613307	-0.0745876381014769	-0.467690749884654	-0.875305118146943	Cluster 3
TR1107_c12_g1	1.48791304195117	-0.415993605233829	-0.397110050390103	-0.674809386327239	Cluster 3
TR1107_c2_g1	1.24930052006849	-0.905606490529997	0.357332681504306	-0.701026711042799	Cluster 3
TR1107_c20_g2	1.4998550015538	-0.518889808846702	-0.485900787886911	-0.495064404820186	Cluster 3
TR11079_c0_g1	1.22018138907733	-0.489533850707673	0.343404343033741	-1.0740518814034	Cluster 3
TR111001_c0_g1	1.47953403298976	-0.632934177600526	-0.262042812382383	-0.584557043006855	Cluster 3
TR11105_c0_g1	1.49176691491683	-0.489710469588981	-0.373050553278006	-0.629005892049847	Cluster 3
TR11115_c0_g1	1.45562996120979	-0.567217308828227	-0.157180700036737	-0.731231952344822	Cluster 3
TR1114_c2_g4	1.35767865236189	-0.305127779602982	-0.0214615869445522	-1.03108928581436	Cluster 3
TR1115_c2_g1	1.37154616607689	-0.051655098149928	-0.309847940742529	-1.01004312718444	Cluster 3
TR11154_c0_g1	1.49760475290841	-0.565918407804918	-0.503899952155064	-0.427786392948425	Cluster 3
TR1116_c0_g1	0.857999538996443	0.162921476498739	0.41586382088615	-1.43678483638133	Cluster 3
TR11161_c1_g2	0.878423068813854	-0.88050710930926	0.853414582868975	-0.851330542373569	Cluster 3
TR11164_c0_g1	1.49402982705536	-0.551848855038468	-0.372385812749535	-0.569795159267361	Cluster 3
TR11165_c0_g1	1.36696991087714	-0.79010770681467	-0.701188944567696	0.124326740505227	Cluster 3
TR11179_c0_g1	1.49234670797479	-0.359210470761652	-0.597148135359457	-0.535988101853684	Cluster 3
TR11186_c0_g1	0.840676681653664	-1.44697080115923	0.21442857846817	0.391865541037394	Cluster 3
TR11191_c0_g1	1.44852641753191	-0.11555196493132	-0.664423798355092	-0.668550654245496	Cluster 3
TR11198_c0_g1	1.48012206292531	-0.505644231761282	-0.288796142958297	-0.685681688205735	Cluster 3
TR1120_c5_g1	1.48708681768716	-0.435781392379782	-0.677385744779614	-0.373919680527763	Cluster 3
TR1122_c1_g2	1.03978727161401	-0.701009463819973	-0.997049148169226	0.658271340375186	Cluster 3
TR11221_c0_g1	1.38418192757376	-0.786810689811346	0.0798266873413723	-0.67719792510379	Cluster 3
TR11224_c0_g1	1.34889643454845	0.168931098326278	-0.763412827698806	-0.754414705175921	Cluster 3
TR11233_c0_g1	1.17218458484834	-0.606302371473278	0.458095125113143	-1.0239773384882	Cluster 3
TR112426_c0_g1	1.49978612193942	-0.497189371930604	-0.480753359635377	-0.521843390373444	Cluster 3
TR11248_c0_g1	1.16038193547778	0.463433101047096	-0.566595585971565	-1.05721945055331	Cluster 3
TR112537_c0_g1	1.46374833026046	-0.687621308633982	-0.183819557753639	-0.592307463872836	Cluster 3
TR11255_c0_g1	1.29262266140296	-0.163253746742168	0.0118299816479829	-1.14119889630878	Cluster 3
TR112576_c0_g1	1.49887842275625	-0.526965464635234	-0.444947493485781	-0.526965464635234	Cluster 3
TR112624_c0_g1	1.4816727887773	-0.703675977594341	-0.330490515319589	-0.447506295863367	Cluster 3
TR11263_c0_g1	1.12901665894685	-1.10592111753645	0.489447819889625	-0.512543361300024	Cluster 3
TR112716_c0_g1	1.49306879223366	-0.581086232653101	-0.363178895408188	-0.548803664172374	Cluster 3
TR11279_c0_g1	1.49670598342861	-0.520630677330182	-0.409128225842664	-0.566947080255767	Cluster 3
TR11284_c0_g1	1.48340017158948	-0.496274646071068	-0.311866580864332	-0.675258944654076	Cluster 3
TR11284_c0_g3	1.47959660912782	-0.612347903579632	-0.260760590519556	-0.606488115028631	Cluster 3
TR112902_c0_g1	1.46543093781798	-0.654130050895256	-0.187108138127934	-0.624192748794787	Cluster 3
TR113_c3_g1	1.22214384978338	-0.525912924342876	0.354526428884531	-1.05075735432504	Cluster 3
TR11303_c1_g1	1.29713340020107	-0.7666695708988	0.277431320717563	-0.807895150019833	Cluster 3
TR1131_c0_g1	1.43360866297931	-0.144676103603417	-0.428640591727537	-0.860291967648355	Cluster 3
TR11315_c0_g1	1.44587862700269	-0.726667940333158	-0.607351881715171	-0.111858804954363	Cluster 3
TR1132_c0_g1	1.45478655160485	-0.314582070044179	-0.31067876401804	-0.82952571754263	Cluster 3
TR11330_c0_g1	1.48850418298871	-0.3353630604175	-0.517326613703966	-0.635814508867247	Cluster 3
TR113494_c0_g1	1.48348567229054	-0.69364347134404	-0.339227099124457	-0.45061510182204	Cluster 3
TR11353_c0_g1	1.1955638950112	0.447633809631937	-0.721096123135196	-0.922101581507939	Cluster 3
TR11362_c0_g1	1.27131870371499	0.311924817332388	-0.662932913984182	-0.920310607063198	Cluster 3
TR11386_c0_g2	1.44636798431912	-0.575738712204696	-0.121032179917596	-0.749597092196823	Cluster 3
TR11397_c0_g1	1.2100824441241	0.427442057377168	-0.740498212075939	-0.897026289425325	Cluster 3
TR113974_c0_g1	1.07846054308748	0.622648218597725	-0.816301327406173	-0.884807434279036	Cluster 3
TR11399_c0_g1	1.49363367340746	-0.5585512638553	-0.367818140788753	-0.567264268763408	Cluster 3
TR11400_c0_g1	1.49848121874745	-0.539221493517794	-0.436591462518244	-0.522668262711415	Cluster 3
TR11405_c0_g2	0.712767901747599	0.0162238237419325	0.690488553695926	-1.41948027918546	Cluster 3
TR11435_c0_g1	0.862488882755343	0.131340263901684	0.43716638564377	-1.4309955323008	Cluster 3
TR114367_c0_g1	1.42266037590957	-0.44650954746747	-0.100627702327471	-0.875523126114629	Cluster 3
TR11461_c0_g1	1.00813540117724	0.673617745332066	-1.08145433944468	-0.600298807064631	Cluster 3
TR11470_c0_g1	1.49740624714723	-0.580123114404547	-0.442400717703803	-0.474882415038884	Cluster 3
TR11473_c0_g1	1.47171449346917	-0.457658280927849	-0.272027737638883	-0.742028474902434	Cluster 3
TR11501_c0_g1	1.47854247009871	-0.61954350289483	-0.254658985852476	-0.604339981351399	Cluster 3
TR115076_c0_g1	1.13543962470275	-0.719019224445016	0.535794248331614	-0.952214648589346	Cluster 3
TR11522_c0_g2	1.48645176100584	-0.581348196144125	-0.30611202437331	-0.598991540488408	Cluster 3
TR11528_c1_g1	0.949687463218109	0.196251898021457	0.264583423639957	-1.41052278487952	Cluster 3
TR11530_c0_g1	1.48185563333999	-0.315356899168988	-0.473035348753482	-0.69346338541752	Cluster 3
TR11540_c0_g1	1.42547359936435	-0.0764581724861112	-0.51286326658492	-0.836152160293317	Cluster 3
TR11549_c0_g1	1.43353615432891	-0.604785258358686	-0.0710134948524393	-0.757737401117786	Cluster 3
TR11553_c1_g1	1.37560947277345	-0.551170125454682	0.0694752258976489	-0.893914573216418	Cluster 3
TR11557_c0_g1	1.33550598685447	-0.720534139635196	0.196577131106686	-0.811548978325958	Cluster 3
TR115670_c0_g1	1.03110949954042	-0.661710636016844	0.661091462594914	-1.03049032611849	Cluster 3
TR115702_c0_g1	1.46282656962065	-0.735545563255582	-0.198349365372292	-0.528931640992778	Cluster 3
TR11572_c1_g1	1.44718899935244	-0.71679805791345	-0.115086413849568	-0.615304527589421	Cluster 3
TR11609_c0_g1	1.1770449133416	-0.81663074202266	0.484146101928435	-0.844560273247376	Cluster 3
TR116131_c0_g2	1.48307432138193	-0.501548770503707	-0.307400859340982	-0.67412469153724	Cluster 3
TR11615_c0_g1	1.38677511123146	-0.359304796247917	-0.0555282008793487	-0.971942114104192	Cluster 3
TR116166_c0_g1	1.09068357513625	0.0830719550886948	0.159666730158557	-1.3334222603835	Cluster 3
TR11624_c0_g2	1.4174746703122	-0.838610668823449	-0.0445280001145195	-0.534336001374233	Cluster 3
TR11630_c0_g1	1.45216122469919	-0.742682548889551	-0.564465842358573	-0.145012833451062	Cluster 3
TR11630_c4_g1	1.44157682390265	-0.324292897420573	-0.248377002859014	-0.868906923623062	Cluster 3
TR11634_c0_g1	1.49194835042705	-0.590266570151396	-0.352962191282667	-0.548719588992991	Cluster 3
TR11648_c0_g1	1.37424303457915	-0.807471532828644	-0.669928657926849	0.103157156176347	Cluster 3
TR11651_c0_g3	1.49102205570678	-0.561790387588095	-0.343147642148404	-0.586084025970282	Cluster 3
TR116557_c0_g1	1.45444297592633	-0.830440021738583	-0.300272098255759	-0.32373085593199	Cluster 3
TR11656_c0_g1	1.38187938216458	-0.853205830654646	-0.598029240198119	0.0693556886881845	Cluster 3
TR11662_c1_g1	0.72426688316389	0.23309738768493	0.511981762236543	-1.46934603308536	Cluster 3
TR116748_c0_g1	1.49704526808845	-0.427231016183015	-0.489752628307359	-0.580061623598078	Cluster 3
TR116822_c0_g1	1.49908494802314	-0.526737767252063	-0.45038166962096	-0.521965511150119	Cluster 3
TR11689_c0_g1	1.45759296165826	-0.546898516192437	-0.171056364095432	-0.739638081370389	Cluster 3
TR11689_c1_g1	1.35234809774435	-0.642477667699141	0.14826407716134	-0.858134507206545	Cluster 3
TR11696_c1_g2	1.09069935480176	0.257339531446729	-0.0276654907224775	-1.32037339552601	Cluster 3
TR117020_c0_g1	1.49586206108221	-0.551107075135552	-0.393647910811108	-0.551107075135552	Cluster 3
TR11711_c1_g1	1.42869956469515	-0.554304202695931	-0.0702639130177942	-0.804131448981421	Cluster 3
TR11718_c0_g1	1.37451867512748	0.108045765758029	-0.737686143518886	-0.744878297366621	Cluster 3
TR11721_c0_g1	1.19659837514627	0.447827710481519	-0.734082189034923	-0.910343896592866	Cluster 3
TR11728_c0_g1	1.49252850261331	-0.497396955528441	-0.619654961262212	-0.375476585822656	Cluster 3
TR117307_c0_g1	1.49964580781174	-0.509702220320039	-0.469753303450842	-0.520190284040861	Cluster 3
TR11751_c0_g1	1.3923909009765	0.0193206535165718	-0.526398909614085	-0.885312644878991	Cluster 3
TR117512_c0_g1	1.45822670005023	-0.49858486435541	-0.193000592653707	-0.766641243041115	Cluster 3
TR11765_c3_g1	1.4807761721247	-0.573349310548283	-0.270873690022811	-0.636553171553606	Cluster 3
TR11767_c0_g1	1.41223390148019	-0.685059342205426	0.00512513223595091	-0.732299691510712	Cluster 3
TR117701_c0_g1	1.49426454438499	-0.470006058471242	-0.407929786597682	-0.616328699316062	Cluster 3
TR11788_c0_g1	1.20725020349149	-0.680507053745009	0.42245928002854	-0.949202429775022	Cluster 3
TR117918_c0_g1	1.43489678388668	-0.300054386161202	-0.245625494183961	-0.889216903541518	Cluster 3
TR11798_c0_g1	1.49568549182427	-0.494189850884623	-0.407999393479153	-0.59349624746049	Cluster 3
TR11813_c0_g1	1.48051870621056	-0.506600928216881	-0.290538496796434	-0.683379281197247	Cluster 3
TR11816_c0_g2	1.48369715655436	-0.537334032259452	-0.296952586244373	-0.649410538050536	Cluster 3
TR1182_c0_g1	1.40732002903766	-0.300829263621099	-0.155255946263941	-0.95123481915262	Cluster 3
TR1182_c1_g1	1.35304494938319	-0.348849708595132	0.0191361107434803	-1.02333135153153	Cluster 3
TR118221_c0_g1	1.3255114842885	0.219529155678808	-0.797529970630605	-0.7475106693367	Cluster 3
TR118271_c0_g1	1.28295763131852	-1.1584108726426	-0.0156471054323042	-0.10889965324362	Cluster 3
TR11836_c0_g2	0.877891276541156	-0.410634239379413	0.754177600714217	-1.22143463787596	Cluster 3
TR11840_c0_g1	1.29254205344236	-1.00404514870927	-0.51815562494826	0.229658720215163	Cluster 3
TR1185_c0_g1	0.811097955049016	-0.464283657028057	0.843062406479519	-1.18987670450048	Cluster 3
TR11850_c0_g1	0.91608517978779	-1.36756555492676	-0.0813714629610932	0.532851838100061	Cluster 3
TR11850_c1_g1	1.49419489494889	-0.426912827128255	-0.44537567321802	-0.621906394602617	Cluster 3
TR11860_c0_g1	0.928577076278615	-1.06693798376189	-0.634316554729673	0.772677462212951	Cluster 3
TR118629_c0_g1	1.48625597363088	-0.590921049756857	-0.304413874117169	-0.590921049756857	Cluster 3
TR1187_c5_g1	1.15854006496458	0.489511637426453	-0.997412799693614	-0.650638902697415	Cluster 3
TR11919_c0_g1	1.47586681302219	-0.53047679130723	-0.256442406798022	-0.68894761491694	Cluster 3
TR11920_c0_g1	1.15474447758454	-0.133779625659137	0.240344980573909	-1.26130983249931	Cluster 3
TR11922_c2_g1	1.48194781621763	-0.513841202608122	-0.295396633383413	-0.672709980226092	Cluster 3
TR11924_c1_g1	1.43638027523303	-0.222165460445094	-0.332976594750227	-0.881238220037713	Cluster 3
TR11929_c0_g1	1.38140281949067	-0.00519669128819244	-0.419097868006574	-0.957108260195903	Cluster 3
TR119440_c0_g1	1.46154630626097	-0.544836788724505	-0.18737773157192	-0.729331785964549	Cluster 3
TR11946_c0_g2	1.44841193324639	-0.26124730575119	-0.339443778220934	-0.847720849274269	Cluster 3
TR119474_c0_g1	1.44951986707335	-0.556964173132165	-0.137769150647914	-0.754786543293273	Cluster 3
TR1195_c1_g2	0.962030177686459	0.354701914569858	0.0770905425404683	-1.39382263479679	Cluster 3
TR1195_c3_g1	1.11296768536506	-0.565501566315927	-1.07736585317911	0.529899734129979	Cluster 3
TR11957_c0_g1	1.49261879193599	-0.618890718607605	-0.376188476016387	-0.497539597311996	Cluster 3
TR11961_c0_g1	1.12487016012248	-0.288475763194509	0.388546584688107	-1.22494098161608	Cluster 3
TR11968_c0_g1	1.4991756682482	-0.541693096659937	-0.496830886617638	-0.460651684970622	Cluster 3
TR1197_c5_g1	1.16103753505929	0.359851522617528	-0.332690533548626	-1.18819852412819	Cluster 3
TR11973_c0_g1	0.663558367628541	0.383880469647783	0.441620422779294	-1.48905926005562	Cluster 3
TR119796_c0_g1	1.47456591400422	-0.542722176682108	-0.24576098566737	-0.686082751654741	Cluster 3
TR11980_c0_g1	1.05149336528747	-1.23397340319537	0.512560479438269	-0.330080441530371	Cluster 3
TR11981_c0_g1	1.49964054420682	-0.515359473455122	-0.515359473455122	-0.46892159729658	Cluster 3
TR11984_c0_g1	1.43716898688879	-0.387870072160882	-0.18289808280757	-0.866400831920343	Cluster 3
TR11986_c0_g1	1.47259370399851	-0.752603041368031	-0.3058512276197	-0.414139435010783	Cluster 3
TR12_c2_g1	1.49794467600313	-0.559326447096004	-0.431801892519212	-0.506816336387913	Cluster 3
TR120056_c0_g2	1.48519992563897	-0.66359996677486	-0.320514269666769	-0.501085689197343	Cluster 3
TR120210_c0_g1	1.41706400829676	-0.683521575803781	-0.00922009985417726	-0.724322332638802	Cluster 3
TR12024_c0_g1	1.45498169422692	-0.635047258806223	-0.142014787834303	-0.67791964758639	Cluster 3
TR120322_c0_g1	1.04375714413461	-0.793499583260232	0.665318881348964	-0.915576442223345	Cluster 3
TR12040_c0_g2	1.45825561315812	-0.15746422113914	-0.613882253426503	-0.686909138592481	Cluster 3
TR12046_c1_g1	1.13068908822486	-0.97546188110507	-0.693230595432717	0.538003388312922	Cluster 3
TR12077_c0_g2	1.07888153671498	-1.03713446021489	0.595363158146785	-0.637110234646874	Cluster 3
TR12078_c0_g1	1.49231702683601	-0.622056661953624	-0.374471920877555	-0.495788444004829	Cluster 3
TR12099_c0_g1	1.31724792994757	-0.787557404310172	0.237312680208214	-0.767003205845615	Cluster 3
TR1210_c1_g1	0.990058860268062	0.457133844386506	-0.105685056380035	-1.34150764827453	Cluster 3
TR12103_c0_g1	1.48662350549804	-0.341443169349391	-0.666526619610944	-0.478653716537709	Cluster 3
TR1211_c0_g1	1.46461987129702	-0.277754851923389	-0.401838423493482	-0.785026595880152	Cluster 3
TR12117_c1_g2	1.29531348652726	-0.777188091916358	0.281268071360206	-0.799393465971111	Cluster 3
TR121204_c0_g2	1.48046105261956	-0.536483906196792	-0.278502574255165	-0.665474572167605	Cluster 3
TR12126_c1_g1	1.49582837019859	-0.395356550270646	-0.531911447633967	-0.568560372293976	Cluster 3
TR12150_c0_g1	1.17805575396988	0.398111780546029	-0.462861072556347	-1.11330646195956	Cluster 3
TR121659_c0_g2	1.35736156170223	-0.887505636497611	-0.595150838592516	0.125294913387898	Cluster 3
TR12167_c0_g1	1.34946794343311	-0.590864161483201	0.141311191518575	-0.899914973468481	Cluster 3
TR12177_c0_g2	1.46417347203917	-0.56547389264961	-0.191857213577546	-0.706842365812013	Cluster 3
TR12181_c0_g1	1.44562465133533	-0.561087193440652	-0.122779079976425	-0.761758377918251	Cluster 3
TR12182_c0_g1	1.47610453656825	-0.449501381469702	-0.298700918008899	-0.727902237089647	Cluster 3
TR12182_c0_g2	1.46227263428168	-0.487424211427226	-0.21446665302798	-0.760381769826473	Cluster 3
TR12186_c1_g1	1.49108993999328	-0.542214523633921	-0.34701729512571	-0.601858121233653	Cluster 3
TR12188_c0_g1	1.47873713126671	-0.546303272866424	-0.266001070034437	-0.666432788365847	Cluster 3
TR121934_c0_g2	1.45295547117946	-0.514826741756503	-0.165888616788207	-0.772240112634755	Cluster 3
TR12210_c3_g1	1.49109959031701	-0.536556318443388	-0.348522072917469	-0.606021198956148	Cluster 3
TR12210_c3_g2	1.49654325860024	-0.511927238964661	-0.409984185554452	-0.574631834081129	Cluster 3
TR122100_c0_g1	1.49921691824044	-0.534278167407502	-0.508373771411987	-0.456564979420956	Cluster 3
TR12228_c0_g1	1.49443223281943	-0.376571392406605	-0.564401191040408	-0.55345964937242	Cluster 3
TR12230_c0_g1	1.41105723501986	-0.449686150269197	-0.0656056317214764	-0.89576545302919	Cluster 3
TR12232_c0_g1	1.41323773101603	-0.176428911456197	-0.296858202552578	-0.93995061700725	Cluster 3
TR12239_c0_g1	1.19445266724779	0.457260712113974	-0.83350270434	-0.818210675021763	Cluster 3
TR122489_c0_g1	1.43517350585275	-0.603387122963417	-0.0765801394114496	-0.755206243477884	Cluster 3
TR12254_c0_g1	1.49897109929141	-0.519894430912204	-0.447706152120657	-0.531370516258553	Cluster 3
TR12267_c0_g1	0.794677901843194	-0.333441559553429	0.806429146232742	-1.26766548852251	Cluster 3
TR1227_c0_g1	1.32524297629721	0.150656694227452	-0.481148651920084	-0.99475101860458	Cluster 3
TR1231_c8_g1	1.48378822584925	-0.36984893018504	-0.413522980983952	-0.700416314680255	Cluster 3
TR12312_c0_g1	1.49173710023627	-0.469231857820798	-0.385190331046923	-0.637314911368546	Cluster 3
TR1235_c0_g1	1.47764128614186	-0.529194560690574	-0.265952204238789	-0.682494521212496	Cluster 3
TR12352_c0_g1	1.48325494837357	-0.289798881294329	-0.640332359596606	-0.55312370748263	Cluster 3
TR12356_c0_g1	1.49124078634234	-0.582166072746258	-0.564253270507912	-0.344821443088168	Cluster 3
TR12358_c0_g1	0.808295264036205	0.107932602022639	0.520474991975835	-1.43670285803468	Cluster 3
TR1238_c1_g1	0.951888902421034	0.651235893196116	-1.24019366305278	-0.362931132564365	Cluster 3
TR12381_c0_g1	1.46991900393797	-0.672515644959993	-0.212778616514849	-0.584624742463128	Cluster 3
TR123869_c0_g1	1.28114487654807	-0.640572438274037	0.289290778575372	-0.929863216849409	Cluster 3
TR12409_c0_g1	1.47669351810891	-0.695610748957803	-0.26713799447398	-0.513944774677126	Cluster 3
TR1241_c1_g1	1.44981077593602	-0.613915089331758	-0.124864085965781	-0.711031600638477	Cluster 3
TR1241_c1_g2	1.46618186320476	-0.215066528211912	-0.522087039477785	-0.729028295515067	Cluster 3
TR12419_c0_g1	1.08221146571759	-0.569042375518549	0.572070347110058	-1.0852394373091	Cluster 3
TR12433_c1_g1	1.46850452740802	-0.520949930114018	-0.225608237450952	-0.721946359843048	Cluster 3
TR1244_c0_g1	1.48754670020032	-0.626500349659498	-0.32097474372105	-0.540071606819767	Cluster 3
TR124616_c0_g1	0.920161081630931	-0.0488492881905908	0.5054405941353	-1.37675238757564	Cluster 3
TR12468_c1_g1	1.48172235226107	-0.710690105858826	-0.418478842659854	-0.352553403742396	Cluster 3
TR12473_c1_g1	1.39011283704789	-0.612644807379048	0.0528678260174813	-0.830335855686324	Cluster 3
TR12474_c0_g1	1.49326160054021	-0.58034321256012	-0.365186097101047	-0.547732290879041	Cluster 3
TR12486_c0_g1	1.36427330327167	-0.85627134389604	0.11783550604074	-0.625837465416372	Cluster 3
TR12491_c0_g1	0.99966426766132	-0.650835925563122	0.696287656166183	-1.04511599826438	Cluster 3
TR12491_c0_g2	1.32134284308098	-0.00134830902355206	-0.222470988886084	-1.09752354517135	Cluster 3
TR12493_c0_g1	1.45053868645239	-0.142328430612239	-0.554172400043398	-0.754037855796755	Cluster 3
TR12496_c1_g2	1.48657691127648	-0.401139801455557	-0.401139801455557	-0.684297308365363	Cluster 3
TR12517_c0_g3	1.3887067348379	-0.0203786739588918	-0.424435832924215	-0.943892227954793	Cluster 3
TR12520_c0_g1	1.48589181595576	-0.568766886182941	-0.303529126452309	-0.613595803320513	Cluster 3
TR12522_c0_g1	1.46284753994888	-0.51332817001345	-0.204780289647584	-0.74473908028785	Cluster 3
TR12523_c0_g1	1.49341201885073	-0.462343994877075	-0.40506243798965	-0.626005585984004	Cluster 3
TR12532_c1_g1	1.44940137493226	-0.663277062965955	-0.118923983563212	-0.667200328403092	Cluster 3
TR125417_c0_g1	1.10908607876281	-0.762626554243819	0.577873329064117	-0.924332853583108	Cluster 3
TR12542_c0_g1	1.4018768462139	-0.605408227511093	0.020717391815969	-0.817186010518776	Cluster 3
TR12546_c1_g1	1.49989380172452	-0.506147278156265	-0.483318930163312	-0.510427593404944	Cluster 3
TR12565_c0_g1	1.48069620873895	-0.573024848583185	-0.270467728531263	-0.637203631624502	Cluster 3
TR12584_c0_g1	1.48487837650937	-0.562621078766553	-0.297858218170528	-0.624399079572292	Cluster 3
TR12587_c0_g2	1.11961139129313	-0.0575026998549339	0.236775822932081	-1.29888451437027	Cluster 3
TR12601_c0_g1	1.46383980541614	-0.55040376683647	-0.194949018791891	-0.718487019787783	Cluster 3
TR1263_c3_g1	1.4824507294658	-0.297588935809998	-0.669346191006487	-0.515515602649319	Cluster 3
TR12634_c0_g2	1.46013767313306	-0.585945215108413	-0.170113126966959	-0.70407933105769	Cluster 3
TR12637_c0_g1	1.45373540011441	-0.67276427901735	-0.136434713926596	-0.644536407170469	Cluster 3
TR126397_c0_g1	1.49535624133042	-0.557285768626966	-0.387321780541323	-0.550748692162134	Cluster 3
TR126552_c0_g2	1.44886246270254	-0.705667395496059	-0.623253685073161	-0.119941382133324	Cluster 3
TR126661_c0_g1	1.44787445903528	-0.59138534242286	-0.122355588087488	-0.734133528524929	Cluster 3
TR1268_c2_g1	1.49330575798344	-0.52188194310148	-0.372034652507986	-0.599389162373977	Cluster 3
TR12685_c0_g1	1.47748840823102	-0.71739009064126	-0.297876367704095	-0.462221949885665	Cluster 3
TR12712_c1_g1	1.49943216306995	-0.497622542609286	-0.534548053346036	-0.467261567114625	Cluster 3
TR127346_c0_g1	1.4612975179113	-0.663450405942209	-0.168529202795609	-0.629317909173478	Cluster 3
TR12745_c0_g1	1.26622454819063	-0.716629212380231	0.33021904630625	-0.879814382116653	Cluster 3
TR12749_c0_g1	1.49032827015664	-0.361219211546793	-0.490396942828428	-0.638712115781416	Cluster 3
TR12754_c0_g1	1.49274006015894	-0.460892092307138	-0.399841087542573	-0.632006880309229	Cluster 3
TR12756_c0_g1	1.04142294767851	-0.799899882	0.668678688836084	-0.910201754514595	Cluster 3
TR127690_c0_g1	1.49867352130807	-0.529288769075914	-0.440095983156247	-0.529288769075914	Cluster 3
TR127705_c0_g1	1.44950217923051	-0.213391505984593	-0.406604752178983	-0.829505921066933	Cluster 3
TR1279_c0_g2	0.873000309013517	-1.0300147530807	0.841597420200082	-0.684582976132902	Cluster 3
TR127904_c0_g1	1.49086650983439	-0.580779323108177	-0.341282695022331	-0.568804491703885	Cluster 3
TR12799_c0_g1	1.43439357899648	-0.612346895162211	-0.0721531858710451	-0.749893497963226	Cluster 3
TR12806_c0_g1	1.4097314221716	-0.526694486108054	-0.0259627434777965	-0.85707419258575	Cluster 3
TR1282_c0_g1	1.44689939177872	-0.592808192364503	-0.118561638472901	-0.735529560941315	Cluster 3
TR12826_c0_g1	1.49760867398221	-0.552113796859801	-0.420986770105598	-0.524508107016811	Cluster 3
TR12832_c0_g1	1.44809245190724	-0.598802892139818	-0.121480658549011	-0.727808901218414	Cluster 3
TR12836_c0_g1	1.42323159354327	-0.698583589585839	-0.0277829471873006	-0.69686505677013	Cluster 3
TR12837_c0_g1	1.39099968860938	0.0624326610686438	-0.77666230369393	-0.676770045984099	Cluster 3
TR12862_c0_g1	1.46964101252935	-0.648276174510022	-0.613873458781463	-0.207491379237868	Cluster 3
TR128633_c0_g1	1.47079782362673	-0.530404673237708	-0.232231235309483	-0.708161915079535	Cluster 3
TR128863_c0_g1	1.3463935076694	-0.837884371725595	0.167576874345119	-0.676086010288929	Cluster 3
TR128903_c0_g1	1.3342018524103	-0.865031970244038	0.190600264630042	-0.6597701467963	Cluster 3
TR12895_c0_g1	1.47914972245923	-0.573547851565826	-0.261618318258096	-0.643983552635313	Cluster 3
TR1290_c1_g1	1.49141242202599	-0.468160029484436	-0.383188575616406	-0.640063816925144	Cluster 3
TR129007_c0_g1	1.01156769769322	-0.868105698904127	0.706996364952413	-0.850458363741509	Cluster 3
TR12911_c0_g1	1.48784361209596	-0.574513870017252	-0.316719184753101	-0.596610557325608	Cluster 3
TR129141_c0_g1	1.47640606550435	-0.554961145189577	-0.251303160085846	-0.670141760228923	Cluster 3
TR12915_c0_g1	1.47153485757884	-0.53919763598629	-0.23247573018822	-0.699861491404326	Cluster 3
TR129273_c0_g1	1.34865996141202	-0.00723845433621673	-0.295638704832461	-1.04578280224334	Cluster 3
TR1294_c0_g2	1.45500580146932	-0.482393047864816	-0.18859235225417	-0.784020401350337	Cluster 3
TR12944_c0_g1	1.46439584505706	-0.531384146307626	-0.203903218931996	-0.72910847981744	Cluster 3
TR12945_c0_g1	1.47113423700791	-0.498990646800706	-0.247073038707146	-0.725070551500055	Cluster 3
TR12946_c0_g1	1.49538788548929	-0.522484923845657	-0.392764528959839	-0.580138432683798	Cluster 3
TR12949_c0_g1	1.00488376525592	0.686786912301034	-1.05518852691291	-0.636482150644041	Cluster 3
TR12950_c0_g1	1.49124189290334	-0.542628107285532	-0.348175419928973	-0.600438365688833	Cluster 3
TR12952_c0_g1	1.46199247192619	-0.495712435198559	-0.20927998209391	-0.757000054633717	Cluster 3
TR129623_c0_g1	1.5	-0.5	-0.5	-0.5	Cluster 3
TR129644_c0_g1	1.47704491142016	-0.579879954375002	-0.249051668762592	-0.648113288282562	Cluster 3
TR12983_c0_g1	1.46977596312674	-0.496446789541976	-0.242109518052491	-0.73121965553227	Cluster 3
TR13_c1_g1	1.14877653691779	-0.52505209743766	-1.08971717890697	0.465992739426839	Cluster 3
TR1300_c2_g1	0.845330669568565	0.501901949012863	0.0767144938817819	-1.42394711246321	Cluster 3
TR13041_c0_g1	1.47039096447386	-0.670704650461761	-0.214969439250564	-0.584716874761535	Cluster 3
TR13054_c2_g1	1.45207049805209	-0.181410362349303	-0.475184885459101	-0.795475250243689	Cluster 3
TR1309_c10_g1	1.15409446755311	0.505819578802348	-0.698512751679433	-0.961401294676027	Cluster 3
TR131_c1_g1	1.21029037575124	-0.313993155295233	0.27120219122185	-1.16749941167785	Cluster 3
TR13110_c0_g1	1.48398056919629	-0.594103977794976	-0.28857020455985	-0.601306386841462	Cluster 3
TR131112_c0_g1	1.45532341929127	-0.27378252358514	-0.824284292120059	-0.35725660358607	Cluster 3
TR13131_c0_g1	1.07980372826797	-1.13437864594216	0.549647385147232	-0.495072467473039	Cluster 3
TR13149_c0_g1	1.48214324734824	-0.499915299580642	-0.302765603971374	-0.679462343796224	Cluster 3
TR1315_c2_g1	1.16141330255102	-0.642293822212714	0.483351852542772	-1.00247133288108	Cluster 3
TR13151_c0_g1	1.0008323391276	-0.387795970044132	0.604536731383866	-1.21757310046733	Cluster 3
TR13174_c0_g1	1.48991687968454	-0.586413789261703	-0.333202732073137	-0.570300358349704	Cluster 3
TR13188_c0_g1	1.47872534993163	-0.56814859498674	-0.260348001765933	-0.650228753178956	Cluster 3
TR13189_c0_g2	1.49992593228527	-0.492626705740293	-0.493275112065717	-0.51402411447926	Cluster 3
TR13198_c0_g1	1.02554826076022	0.685502726146111	-0.770410755007472	-0.940640231898863	Cluster 3
TR13215_c0_g1	1.17398311156939	-0.968858589877592	0.472780529093554	-0.677905050785347	Cluster 3
TR13245_c0_g1	1.44165418791577	-0.53185907599943	-0.119565218635531	-0.790229893280807	Cluster 3
TR1325_c0_g2	0.895284964675951	-1.01784137515363	-0.698640780632664	0.821197191110347	Cluster 3
TR1327_c1_g1	1.47818563341636	-0.532867731386897	-0.267468495511374	-0.677849406518093	Cluster 3
TR13295_c0_g1	1.42997718489719	-0.392240898783778	-0.156332608083529	-0.881403678029883	Cluster 3
TR1330_c0_g1	0.906679953546364	0.633187994142171	-0.226147353122442	-1.31372059456609	Cluster 3
TR1332_c0_g2	1.2183132909619	0.184505747938954	-0.202550959289468	-1.20026807961138	Cluster 3
TR13369_c0_g3	1.37014532417472	0.0627102170723926	-0.931173804667971	-0.501681736579142	Cluster 3
TR13390_c0_g1	1.06754100945523	0.637336964558012	-0.873094901432627	-0.831783072580612	Cluster 3
TR13402_c0_g1	1.49595696552558	-0.531546927780455	-0.39697808530439	-0.567431952440739	Cluster 3
TR13419_c1_g1	0.682760933375543	0.122102219831182	0.645191019581333	-1.45005417278806	Cluster 3
TR13427_c0_g1	1.47571828611314	-0.63529316907792	-0.601183468724743	-0.239241648310477	Cluster 3
TR1343_c0_g1	1.47976402081576	-0.471851415040868	-0.30431816226402	-0.703594443510868	Cluster 3
TR13449_c0_g1	1.48140614234371	-0.503286840676193	-0.296992587960863	-0.68112671370665	Cluster 3
TR13454_c0_g1	1.35824082792731	-0.782799561593175	0.146353308817907	-0.721794575152043	Cluster 3
TR13469_c0_g1	1.49011393150692	-0.571100934101772	-0.33478330619759	-0.58422969120756	Cluster 3
TR13472_c0_g1	1.48872492663053	-0.518266236593985	-0.336563332927568	-0.633895357108977	Cluster 3
TR13475_c0_g1	1.41760218498892	-0.562427900677707	-0.0348930033017717	-0.820281281009442	Cluster 3
TR1348_c0_g1	0.720678715553152	0.326188118521931	-1.47901136156655	0.432144527491471	Cluster 3
TR13481_c0_g1	1.43438494098692	-0.644933980985095	-0.066866064918187	-0.722584895083635	Cluster 3
TR13481_c1_g1	1.49022874725608	-0.521411864164091	-0.346486593605815	-0.622330289486173	Cluster 3
TR13481_c1_g2	1.49589328623928	-0.519278345740757	-0.399524293840304	-0.577090646658217	Cluster 3
TR13482_c0_g1	1.38213530020938	-0.761584757258231	-0.708489523636743	0.0879389806855913	Cluster 3
TR134852_c0_g1	1.13869043592787	-0.792283444119139	0.53942268005121	-0.885829671859939	Cluster 3
TR1351_c5_g1	1.49387146338564	-0.534172220240926	-0.373791214648008	-0.585908028496705	Cluster 3
TR13513_c0_g1	1.27227853591298	-1.0158503038685	0.269578397790347	-0.526006629834823	Cluster 3
TR1352_c0_g1	1.20203960680566	0.343526135747072	-0.424426842583817	-1.12113889996892	Cluster 3
TR1352_c1_g2	1.12318464195181	0.55005993355076	-0.702427234076892	-0.970817341425674	Cluster 3
TR13520_c0_g1	1.46580357153032	-0.705327263132413	-0.200278111753648	-0.560198196644262	Cluster 3
TR1353_c1_g3	0.93263804906275	0.679129841184575	-0.375726379668349	-1.23604151057898	Cluster 3
TR135528_c0_g1	1.47277628152004	-0.560701630020321	-0.231756673741733	-0.680317977757989	Cluster 3
TR135775_c0_g1	1.49086768543529	-0.588140463061628	-0.341942129686993	-0.560785092686669	Cluster 3
TR13578_c0_g1	1.4440769517785	-0.855191013196592	-0.364787705981625	-0.224098232600282	Cluster 3
TR135827_c0_g1	1.42833962974971	-0.681529512549679	-0.0443908111622396	-0.702419306037792	Cluster 3
TR13604_c0_g1	1.48273092637464	-0.56098667179483	-0.284808617988145	-0.636935636591669	Cluster 3
TR13613_c0_g1	1.40376140039217	0.0119758293323752	-0.591347032168895	-0.824390197555652	Cluster 3
TR136147_c0_g1	1.31093436096483	-0.667834485774537	0.239101235647674	-0.882201110837968	Cluster 3
TR13615_c0_g1	1.49570947048435	-0.522124303344931	-0.396500410810812	-0.577084756328608	Cluster 3
TR136195_c0_g1	1.4871433655022	-0.398515542389479	-0.408235433667272	-0.680392389445453	Cluster 3
TR13630_c0_g1	1.21456151370276	-0.477981521823732	0.347635611930778	-1.0842156038098	Cluster 3
TR13634_c0_g1	1.48149001915031	-0.598156560010824	-0.272467065184213	-0.610866393955277	Cluster 3
TR1364_c1_g1	1.38964106794983	-0.989016531761615	-0.127876114581289	-0.272748421606927	Cluster 3
TR13667_c0_g1	1.45748690786963	-0.561054100018634	-0.166122163692668	-0.730310644158333	Cluster 3
TR13669_c0_g1	1.47679717196489	-0.244780920587395	-0.626505553082358	-0.605510698295135	Cluster 3
TR13672_c0_g2	1.47687220205672	-0.659483813497026	-0.250789619217179	-0.566598769342516	Cluster 3
TR13682_c0_g1	1.47260155682978	-0.562796238550787	-0.23036737225654	-0.679437946022453	Cluster 3
TR1369_c5_g1	0.992116205601003	0.700393155726864	-1.06173193341188	-0.630777427915989	Cluster 3
TR13701_c0_g1	1.17010634179756	-0.840374503087485	-0.824509876621391	0.494778037911317	Cluster 3
TR13736_c0_g1	1.38589067479167	-0.936831126535154	0	-0.44905954825652	Cluster 3
TR13739_c0_g1	1.46291844698091	-0.519100094089999	-0.202643352238342	-0.741175000652566	Cluster 3
TR137478_c0_g1	1.47670927127477	-0.497543555011715	-0.274644042366467	-0.704521673896588	Cluster 3
TR13753_c0_g1	1.46350828180613	-0.603783632804554	-0.180838633065849	-0.678886015935726	Cluster 3
TR1376_c0_g1	1.02026538090518	0.584836037227325	-0.397057132766248	-1.20804428536626	Cluster 3
TR137708_c0_g1	1.49940723930557	-0.524792533756949	-0.460532223500996	-0.514082482047623	Cluster 3
TR13772_c0_g1	1.4902642743283	-0.342594934925076	-0.534031108797455	-0.613638230605771	Cluster 3
TR13799_c0_g1	1.14314222729109	-1.21803015740265	-0.284133617187959	0.359021547299514	Cluster 3
TR13801_c1_g1	1.45664186730153	-0.606511292706936	-0.697991582579577	-0.152138992015012	Cluster 3
TR13805_c0_g2	1.49674320772442	-0.576165664908969	-0.415225535046129	-0.50535200776932	Cluster 3
TR13826_c0_g1	1.45908047691576	-0.502315735364673	-0.194601047790171	-0.762163693760919	Cluster 3
TR13840_c0_g1	1.49001662811168	-0.547136230643503	-0.337312142192839	-0.605568255275333	Cluster 3
TR13845_c0_g1	1.48171239028523	-0.713526504992788	-0.370797417708467	-0.397388467583975	Cluster 3
TR138657_c0_g2	1.47674657613915	-0.58614204915481	-0.24646962490962	-0.64413490207472	Cluster 3
TR1387_c0_g1	1.49182951150749	-0.516813597815974	-0.360976542303753	-0.614039371387759	Cluster 3
TR13932_c0_g3	1.45826854896095	-0.656604198385993	-0.154873946840227	-0.646790403734732	Cluster 3
TR13934_c0_g1	1.36295990381195	-0.994592362241152	-0.390677125074381	0.0223095835035834	Cluster 3
TR13936_c0_g1	1.45230330884901	-0.577947323589741	-0.141760664276729	-0.732595320982536	Cluster 3
TR13951_c1_g2	1.32287978900545	-0.840955016025078	-0.702837900810363	0.220913127829987	Cluster 3
TR13973_c0_g1	1.47131296529477	-0.563236994526904	-0.224145334556625	-0.683930636211241	Cluster 3
TR139944_c0_g1	1.47329089543164	-0.482553052738334	-0.265395279097328	-0.725342563595983	Cluster 3
TR140_c5_g1	1.49177720574528	-0.458928501784872	-0.392736890950515	-0.640111813009895	Cluster 3
TR14048_c0_g1	1.42532869378802	-0.586300254726294	-0.0502543075479681	-0.78877413151376	Cluster 3
TR14061_c0_g1	1.45094667464957	-0.614012474177852	-0.129059946801714	-0.707874253670008	Cluster 3
TR14073_c0_g1	1.45913469314753	-0.548337241373914	-0.176583179425498	-0.734214272348122	Cluster 3
TR140732_c0_g1	1.49870053999762	-0.487474457034023	-0.455731934250412	-0.555494148713189	Cluster 3
TR14088_c0_g1	1.49477603962605	-0.490709305937845	-0.400116818687782	-0.603949915000425	Cluster 3
TR14109_c0_g1	1.07823614032303	0.487847475592839	-0.351125890076375	-1.21495772583949	Cluster 3
TR14110_c3_g1	1.07894806790272	0.617511158359417	-0.936445492896698	-0.760013733365436	Cluster 3
TR14116_c0_g1	1.46356679688869	-0.581774323896932	-0.185228596397678	-0.696563876594085	Cluster 3
TR1413_c1_g1	1.03838343086464	0.63421903085587	-0.590611819275976	-1.08199064244454	Cluster 3
TR14137_c0_g1	1.49474324055007	-0.513120813920173	-0.38917858833559	-0.592443838294306	Cluster 3
TR14145_c0_g1	1.00820298610019	-0.973066063594168	0.702171725563876	-0.737308648069897	Cluster 3
TR14148_c0_g2	1.43520602965469	-0.705922286348204	-0.0680529398350068	-0.661230803471484	Cluster 3
TR14152_c0_g1	1.05134838183057	0.625500514588889	-0.617625245811132	-1.05922365060832	Cluster 3
TR1416_c0_g1	1.48458573616416	-0.293653021819136	-0.577963075968633	-0.612969638376392	Cluster 3
TR14202_c0_g1	1.37346568664874	-0.577325858617505	0.083265492785754	-0.879405320816985	Cluster 3
TR14216_c0_g1	1.45316135508918	-0.708324881626387	-0.138744048978364	-0.606092424484434	Cluster 3
TR1422_c1_g1	1.37074151858329	0.109286864012897	-0.656701335324134	-0.823327047272049	Cluster 3
[truncated: 2,771 more rows]

## Sheet: Cluster 4
Gene	G	T	P	C	Cluster
[truncated: 1,528 more rows]
