# Supplementary material for: Integrative Metabolomic and Transcriptomic Landscape during Akebia trifoliata Fruit Ripening and Cracking
Source: Int J Mol Sci. 2023 Nov 24;24(23):16732. doi: 10.3390/ijms242316732 (PMC10706055; doi:10.3390/ijms242316732)
Supplement: Supplementary file 1 [file ijms-24-16732-s001.zip › Table S5.xlsx]

## Sheet: Sheet1
gene_id	Family	Family_name	FPKM_ G1	FPKM_ G2	FPKM_ G3	FPKM_ T1	FPKM_ T2	FPKM_ T3	FPKM_ P1	FPKM_ P2	FPKM_ P3	FPKM_ C1	FPKM_ C2	FPKM_ C3
TR1438_c1_g1	AP2	AP2 domain	75.33	81.3	79.45	9.66	11.93	13.43	5.19	6.16	6.35	6.84	5.51	6.33
TR1485_c1_g1	AP2	AP2 domain	7.46	7.86	7.46	12.84	13.72	13.51	22.85	22.76	22.6	54.32	54.33	52.61
TR17614_c0_g1	AP2	AP2 domain	0.12	0.24	0.5	0	0.07	0.35	1.4	1.49	2.83	0.09	0.04	0.26
TR2082_c0_g1	AP2	AP2 domain	9.52	10.91	11.05	7.7	9.61	9.06	11.51	11.5	12.54	5.43	4.8	4.31
TR23750_c0_g1	AP2	AP2 domain	0.22	0.27	0.19	0.33	0.27	0.27	1.02	0.97	0.51	2.39	1.96	1.76
TR23750_c0_g2	AP2	AP2 domain	0.43	0.53	0.45	0.2	0.2	0.23	3.09	2.93	2.83	0.26	0.2	0.35
TR2456_c1_g3	AP2	AP2 domain	6.94	6.6	7.13	3.25	3.25	3.05	2.94	2.79	3.54	1.78	1.74	1.29
TR2664_c1_g1	AP2	AP2 domain	0.57	0.37	0.61	0.2	0.13	0.09	1.81	1.37	1.3	1.26	1.1	0.98
TR4310_c0_g1	AP2	AP2 domain	0.39	0.14	0.17	0.41	0.24	0.32	0.9	1.63	1.37	4.5	4.73	3.86
TR5468_c0_g1	AP2	AP2 domain	8.51	8.95	9.78	1.98	2.33	2.09	9.7	9.64	8.96	1.44	1.57	1.64
TR6403_c0_g1	AP2	AP2 domain	2.29	3.37	2.41	0.77	0.5	0.58	0.32	0.47	0.33	0.16	0.53	0.48
TR690_c0_g1	AP2	AP2 domain	4.44	5.29	5.56	8.68	8.63	8.52	12	11.06	14.01	3.36	3.64	2.92
TR690_c0_g2	AP2	AP2 domain	25.24	23.4	26.27	33.16	34.8	35.72	46.75	46.56	51.62	19.02	18.57	18.58
TR6953_c0_g1	AP2	AP2 domain	8.94	9.1	10.32	6.79	7.24	7.4	2.99	2.68	3.03	2.75	2.65	2.37
TR7510_c0_g1	AP2	AP2 domain	183.02	187.67	192.58	238.65	236.53	239.54	116.18	116.51	113.86	46.82	46.05	47.6
TR9861_c0_g1	AP2	AP2 domain	9.98	11.61	10.96	7.82	7.21	7.34	14.15	14.52	13.37	28.1	27.26	26.59
TR989_c0_g1	AP2	AP2 domain	52.36	57.84	57.45	8.59	10.35	9.43	5.2	4.76	5.24	7.38	6.42	5.69
TR1218_c1_g1	ARF	Auxin response factor	0.09	0.24	0.06	0.09	0.08	0.02	2.5	2.15	1.91	0.18	0.25	0.42
TR14330_c0_g2	ARF	Auxin response factor	1.14	0.83	1.02	0.35	0.31	0.25	0.23	0.24	0.4	0.08	0	0.05
TR14480_c1_g1	ARF	Auxin response factor	0.04	0.02	0.02	0.03	0	0.02	1.08	1.06	0.52	0	0.01	0
TR4747_c0_g1	ARF	Auxin response factor	0.71	0.65	0.75	1.32	1.23	1.53	0.86	0.83	1	1.67	1.3	1.77
TR1114_c1_g3	B3	B3 DNA binding domain	13.56	13.67	11.32	26.24	25.17	27.68	22.59	21.33	19.76	26.98	27.09	27.92
TR12749_c0_g1	B3	B3 DNA binding domain	3.99	3.93	3.64	1.12	1.3	1.4	0.77	1.08	1.43	0.9	1.01	0.75
TR216_c4_g1	B3	B3 DNA binding domain	0.09	0	0.18	0.08	0.17	0.18	19.26	20.93	19.28	1.86	1.09	1.69
TR7183_c0_g2	B3	B3 DNA binding domain	4.32	3.98	3.89	3.36	5.29	3.6	4.22	3.66	4.39	7.99	8.62	8.51
TR7419_c0_g1	B3	B3 DNA binding domain	0.44	0.51	0.51	0.33	0.3	0.27	1.44	1.25	1.68	1.5	1.62	1.55
TR11624_c0_g2	bZIP_1	bZIP transcription factor	4.97	4.33	4.8	1.18	1.73	2.07	2.62	2.88	2.69	1.87	1.99	2.35
TR14728_c0_g1	bZIP_1	bZIP transcription factor	5.74	1.51	1.26	0.51	0.55	0.87	1.04	0.68	0.46	0.54	0.33	0.9
TR38221_c0_g1	bZIP_1	bZIP transcription factor	0.2	0.07	0.04	0.03	0.08	0.04	0.12	0.07	0.04	1.53	1.17	0.58
TR1042_c0_g1	bZIP_2	Basic region leucine zipper	0.03	0.03	0	0.08	0.03	0.07	4.75	4.21	4.51	0.48	0.21	0.31
TR1136_c0_g1	bZIP_2	Basic region leucine zipper	2.21	1.98	2	1.71	1.88	1.95	5.91	5.91	5.83	4.49	4.36	4.02
TR1136_c0_g2	bZIP_2	Basic region leucine zipper	0.14	0.09	0.06	0.01	0.02	0.03	1.13	0.78	0.82	0.07	0.16	0.02
TR2199_c0_g1	bZIP_2	Basic region leucine zipper	18.34	18.33	19.87	26.95	26.24	27.38	29.54	32.48	32.79	12.52	13.34	13.76
TR3209_c0_g1	bZIP_2	Basic region leucine zipper	4.4	4.11	4.34	1.54	1.35	1.16	3.3	3.31	2.92	4.33	3.91	3.9
TR32877_c0_g1	bZIP_2	Basic region leucine zipper	6.02	0.83	1.35	0.27	0.37	0.44	0.96	0.65	0.33	0.16	0.15	0
TR3359_c1_g1	bZIP_2	Basic region leucine zipper	27.94	26.78	26.76	28.21	26.52	28.34	20.46	18.83	18.83	40.69	40.24	38.93
TR4229_c1_g1	bZIP_2	Basic region leucine zipper	53.11	52.04	55.36	33.13	31.71	33.89	20.85	23.29	22.93	8.42	8.47	9.33
TR43639_c0_g1	bZIP_2	Basic region leucine zipper	2.87	0.62	0.52	0.19	0.1	0.4	0.65	0.31	0.53	0.04	0.06	0.25
TR4427_c2_g1	bZIP_2	Basic region leucine zipper	3	1.88	3	5.18	4.49	5.18	4.37	3.55	4.88	0.27	0.51	0.47
TR4464_c1_g1	bZIP_2	Basic region leucine zipper	30.14	35.6	35.71	17.12	17.11	16.57	13.62	13.21	12.64	0.6	0.58	1.29
TR4585_c0_g2	bZIP_2	Basic region leucine zipper	0.06	0	0	0.05	0	0	1.63	1.41	1.68	0.08	0	0.17
TR7101_c0_g1	bZIP_2	Basic region leucine zipper	0.02	0.12	0.08	0.04	0.08	0.03	8.28	8.99	8.91	0.78	0.52	0.41
TR8309_c0_g1	bZIP_2	Basic region leucine zipper	2.13	1.95	2.73	4.11	4.07	3.52	3.81	3.87	3.74	14.55	12.91	13.26
TR1250_c0_g1	CBFB_NFYA	CCAAT-binding transcription factor (CBF-B/NF-YA) subunit B	3.5	5.37	4.43	2.27	2.55	3.18	7.65	7.51	6.99	2.95	2.64	3.71
TR3775_c0_g2	CG-1	CG-1 domain	1.94	2.08	2.06	3.31	2.59	2.49	2.67	2.82	2.77	5.4	5.49	5.42
TR89643_c0_g2	CSD	'Cold-shock' DNA-binding domain	29.82	37.69	42.03	48.92	45.1	46.57	48.16	48.01	40.43	84.75	82.99	77.7
TR672_c2_g1	E2F_TDP	E2F/DP family winged-helix DNA-binding domain	8.38	6.96	7.46	8.14	7.59	8.41	9.4	8.63	9	16.83	16.7	17.64
TR4878_c0_g1	ERF	Ethylene-responsive transcription factor	4.24	4.75	3.44	0.56	1.21	0.79	0.57	0.6	0.77	0.49	0.64	0.28
TR4986_c5_g1	ERF	Ethylene-responsive transcription factor	17.61	20.18	19.73	3.1	3.9	4.17	0.88	0.65	1.03	1.51	1.35	1.38
TR5163_c0_g1	ERF	Ethylene-responsive transcription factor	15.83	17.49	16.8	11.95	13.04	13.39	24.37	25.09	26.89	69.37	65.52	63.73
TR5349_c0_g1	ERF	Ethylene-responsive transcription factor	0.58	0.46	0.25	0.42	0.27	0.48	0.49	0.32	0.29	1.55	1.82	1.95
TR6543_c0_g1	ERF	Ethylene-responsive transcription factor	17.65	17.23	18.9	4.96	4.6	5.02	5.25	4.49	4.83	4.87	5.2	4.39
TR671_c3_g1	ERF	Ethylene-responsive transcription factor	52.01	45.02	44.72	32.17	30.33	33.9	31.74	32.63	32.11	6.63	5.17	5.26
TR908_c1_g3	ERF	Ethylene-responsive transcription factor	59.01	60.06	63.8	37.1	38.27	38.48	20.48	18.42	17.13	7.07	5.61	7.1
TR908_c4_g1	ERF	Ethylene-responsive transcription factor	399.69	425.23	415.41	383.04	361.96	369.82	363.38	370.45	358.42	146.66	140.96	150.3
TR9524_c0_g1	ERF	Ethylene-responsive transcription factor	18.29	20.72	19.93	4.8	7.7	6.11	12.35	12.92	12.26	8.93	8	6.92
TR10196_c0_g1	ERF	Ethylene-responsive transcription factor	10.91	10.45	9.7	5.82	5.52	7.39	7.6	5.74	7.33	1.28	1.31	1.45
TR1059_c5_g1	ERF	Ethylene-responsive transcription factor	41	41.99	47.01	16.58	15.28	16.4	17.35	16.5	14.52	13.17	11.04	13.22
TR11729_c0_g2	ERF	Ethylene-responsive transcription factor	0.29	0.29	0.63	0.12	0.16	0.12	0.25	0.52	0.26	3.51	3.25	3.35
TR1182_c0_g1	ERF	Ethylene-responsive transcription factor	6.57	6.2	6.22	2.02	2.32	1.86	2.49	2.55	2.25	0.37	0.4	0.56
TR1182_c0_g2	ERF	Ethylene-responsive transcription factor	47.18	45.71	55.47	63.48	58.63	61.1	8.24	9.86	8.34	1.89	2	3.04
TR12184_c0_g1	ERF	Ethylene-responsive transcription factor	8.27	8.95	8.84	7.46	8.6	7.88	1.57	1.65	1.63	2.24	2.08	2.4
TR1231_c8_g1	ERF	Ethylene-responsive transcription factor	36.94	43.2	40.71	16.47	14.72	15.81	16.24	14.22	14.8	12.27	9.13	12.43
TR16697_c1_g1	ERF	Ethylene-responsive transcription factor	156.88	159.79	173.41	142.68	140.44	145.15	70.51	63.86	69.58	61.57	66.86	71.3
TR19368_c0_g2	ERF	Ethylene-responsive transcription factor	0.21	0.2	0.21	0.34	0.2	0.24	1.3	1.43	1.68	0.6	0.54	0.48
TR19914_c0_g1	ERF	Ethylene-responsive transcription factor	6.27	6.9	9.58	6.94	6.51	6.32	6.83	7.07	7	2.44	2.99	2.85
TR2325_c0_g1	ERF	Ethylene-responsive transcription factor	2.75	3.24	2.79	1.27	1.8	1.1	3.67	4.24	3.79	2.18	2.36	2.14
TR2327_c1_g1	ERF	Ethylene-responsive transcription factor	3.45	3.7	4.1	1.14	1.03	0.84	2	1.85	1.35	0.28	0.5	0.57
TR26204_c0_g1	ERF	Ethylene-responsive transcription factor	4.89	5.61	5.89	0.7	1.08	0.86	1.92	2.28	2.06	1.15	0.92	1
TR2843_c2_g1	ERF	Ethylene-responsive transcription factor	11.04	10.6	10.45	1.04	1.26	1.12	0.74	0.68	0.65	0.84	0.47	0.49
TR31039_c0_g1	ERF	Ethylene-responsive transcription factor	18.32	18.48	19.97	6.78	7.2	7.34	11.8	12.71	11.59	5.54	6.15	5.58
TR3147_c0_g1	ERF	Ethylene-responsive transcription factor	17.58	17.31	15.65	5.15	6.24	5.95	13.82	16.24	13.32	13.64	12.74	13.44
TR3333_c0_g1	ERF	Ethylene-responsive transcription factor	154.67	154.46	165.58	75.8	70.75	76.19	30.98	30.59	32.84	10.02	10.05	10.84
TR35110_c0_g1	ERF	Ethylene-responsive transcription factor	0.91	0.98	1.45	0.77	1.17	1.11	0.23	0.32	0.4	0.33	0.16	0.05
TR3521_c2_g1	ERF	Ethylene-responsive transcription factor	4.19	3.47	4.03	0.88	1.26	1.04	0.92	0.7	0.34	0	0.08	0
TR3689_c0_g1	ERF	Ethylene-responsive transcription factor	4.09	3.02	3.39	2.44	3.07	2.56	9.69	9.11	9.63	2.42	2.05	1.49
TR112716_c0_g1	Ets	Ets-domain	2.09	0.38	0.25	0.09	0	0.06	0.12	0.3	0	0	0.11	0.08
TR32047_c0_g1	Ets	Ets-domain	1.01	0.34	0.28	0.07	0.02	0.16	0.42	0.13	0.08	0.12	0.04	0.06
TR58687_c0_g1	Ets	Ets-domain	2.5	0.51	0.62	0.04	0.17	0.12	0.52	0.17	0.21	0.18	0.05	0.33
TR10683_c0_g1	GATA	GATA transcription factor	0.08	0.14	0.35	0.12	0.15	0.28	1.31	1.4	1.83	0.26	0.27	0.43
TR1331_c0_g2	GATA	GATA zinc finger	50.61	49.26	50.36	51.88	50	48.66	41.17	43.35	43.4	6.85	6.44	6.9
TR2829_c0_g1	GATA	GATA zinc finger	6.68	5.68	5.74	6.54	6.16	7.07	4.64	5.6	4.74	13.16	14.42	13.71
TR3723_c0_g1	GATA	GATA zinc finger	10.13	9.76	10.27	4.2	4.2	4.41	2.86	3.25	3.5	1.7	1.43	1.14
TR43787_c0_g1	GATA	GATA zinc finger	0.22	0.12	0.19	0.23	0.23	0.25	0.5	0.52	0.61	0.73	0.68	0.71
TR5729_c0_g1	GATA	GATA zinc finger	1.99	1.56	2.33	0.91	1.6	1.07	4.47	2.86	2.91	0.71	0.47	0.71
TR635_c0_g1	GATA	GATA zinc finger	4.89	4.66	4.4	4.17	4.32	3.78	4.28	3.97	4.39	9.22	7.99	7.94
TR6754_c3_g1	GATA	GATA zinc finger	0.34	1.05	0.56	0.12	0.04	0.25	1.24	1.39	1.29	0.69	0.46	0.42
TR11065_c0_g2	HLH	Helix-loop-helix DNA-binding domain	1.57	2.23	1.99	1.18	1.92	1.77	0.29	0.24	0.15	0	0.05	0.2
TR11065_c0_g4	HLH	Helix-loop-helix DNA-binding domain	0.9	0.64	0.9	0.16	0.57	0.37	1.56	1.97	1.38	1	1.18	1.01
TR11114_c0_g1	HLH	Helix-loop-helix DNA-binding domain	4.06	3.85	3.92	4.92	4.42	3.96	2.36	2.59	2.84	5.06	4.34	5.09
TR113_c10_g1	HLH	Helix-loop-helix DNA-binding domain	15.14	14.69	11.43	20.38	20.45	20.02	12.21	11.68	11.86	1.96	2.37	1.82
TR11460_c0_g1	HLH	Helix-loop-helix DNA-binding domain	1.32	1.27	1.38	0.62	0.43	0.69	0.84	0.77	0.92	2.07	2.65	3.01
TR13845_c0_g1	HLH	Helix-loop-helix DNA-binding domain	3.19	2.87	3.41	0.62	0.89	0.53	1.16	0.96	1.08	1.02	1.01	1.08
TR17857_c0_g1	HLH	Helix-loop-helix DNA-binding domain	18.92	17.71	15.79	32.28	37.02	30.49	35.15	32.86	41.03	61.67	65.73	67.85
TR18305_c0_g1	HLH	Helix-loop-helix DNA-binding domain	0.93	1	1.24	0.14	0.04	0.16	0.12	0.24	0.09	0	0.07	0.1
TR204_c7_g1	HLH	Helix-loop-helix DNA-binding domain	5.17	4.9	5.12	4.07	3.65	3.62	3.87	3.89	4.03	15.97	17.96	15.26
TR21286_c0_g1	HLH	Helix-loop-helix DNA-binding domain	0.09	0.14	0.11	0.24	0.18	0.21	0.63	0.97	0.91	0.85	0.71	0.62
TR2265_c1_g2	HLH	Helix-loop-helix DNA-binding domain	1.98	2.88	2.22	2.77	2.82	2.28	4.66	5	4.29	13.43	13.27	14.11
TR2362_c2_g2	HLH	Helix-loop-helix DNA-binding domain	12.13	14.68	14.62	4.08	5.05	4.83	2.36	2.17	2.62	8.15	8.64	8.76
TR29136_c0_g1	HLH	Helix-loop-helix DNA-binding domain	1.8	0.35	0.44	0.13	0.15	0.13	0.34	0.15	0.2	0	0.02	0.09
TR2954_c0_g1	HLH	Helix-loop-helix DNA-binding domain	0.35	0.33	0.76	0.47	0.67	0.53	1.49	2.01	1.51	0.69	0.68	0.7
TR2954_c0_g2	HLH	Helix-loop-helix DNA-binding domain	0.24	0.24	0.25	0.12	0.07	0.12	7.19	6.97	5.09	1	0.9	0.7
TR30638_c0_g1	HLH	Helix-loop-helix DNA-binding domain	7.11	5.42	5.44	0.65	0.75	0.28	1.21	1.1	1.03	0	0.13	0.26
TR3337_c4_g1	HLH	Helix-loop-helix DNA-binding domain	35.32	35.95	42.24	13.43	11.61	13.5	13.81	13.42	13.2	7.3	7.09	6.78
TR4853_c5_g1	HLH	Helix-loop-helix DNA-binding domain	0.24	0.19	0.22	0.14	0.08	0.33	1.06	1.52	1.63	0.27	0.38	0.31
TR5042_c0_g1	HLH	Helix-loop-helix DNA-binding domain	12.48	12.85	14.14	4.7	5.3	5.52	6.25	5.14	5.63	1.65	2.88	2.43
TR5295_c1_g2	HLH	Helix-loop-helix DNA-binding domain	4.67	4.83	4.65	4.59	3.93	3.55	3.28	3.24	3.92	0.13	0.28	0.24
TR6584_c1_g1	HLH	Helix-loop-helix DNA-binding domain	11.25	8.7	8.91	4.57	4.97	5.15	6.17	5.18	6.11	11.23	10.85	10.95
TR7330_c0_g1	HLH	Helix-loop-helix DNA-binding domain	2.44	2.18	2.21	1.09	1.53	1.3	0.34	0.45	0.67	0.21	0.14	0.13
TR7421_c0_g1	HLH	Helix-loop-helix DNA-binding domain	31.07	29.31	33.4	7.46	7.52	7.14	5.73	5.23	6.28	1.05	0.84	1.29
TR8686_c0_g1	HLH	Helix-loop-helix DNA-binding domain	3.08	3.61	3.85	0.83	0.94	0.82	1.07	1.3	1.66	0.68	0.47	0.26
TR94987_c0_g1	HLH	Helix-loop-helix DNA-binding domain	17.98	16.82	17.98	18.92	19.2	18.8	15.85	15.47	16.3	28.4	28.79	29.11
TR1122_c1_g3	Homeobox	Homeobox domain	1.07	0.59	0.52	1.78	1.8	1.76	2.17	2.21	1.97	1.55	1.41	1.08
TR11581_c0_g1	Homeobox	Homeobox domain	19.11	17.73	20.68	13.67	13.96	14.05	31.91	30.41	31.44	15.5	16.05	15.99
TR136004_c0_g1	Homeobox	Homeobox domain	0.05	0.16	0.12	0	0	0	1.09	1.32	0.63	0	0.07	0
TR1555_c2_g1	Homeobox	Homeobox domain	6.68	6.96	7.03	8.55	9.29	8.35	23.58	22.94	22.65	29.22	32.93	30.08
TR1967_c3_g1	Homeobox	Homeobox domain	15.65	15.39	17.03	12.27	12.05	11.4	8.9	7.98	8.63	21.69	23.89	19.88
TR2133_c1_g2	Homeobox	Homeobox domain	12.42	12.94	13.57	37.28	36.82	39.04	42.04	43.14	41.34	61.67	62.87	61.84
TR2595_c1_g1	Homeobox	Homeobox domain	13.44	14.23	15.56	3.91	4.24	4.15	8.13	8.03	9.25	1.79	1.89	1.95
TR2715_c0_g1	Homeobox	Homeobox domain	3.99	5.07	4.2	12.57	12.15	12.78	10.49	11.13	10.07	10.43	10.65	11.07
TR2715_c0_g2	Homeobox	Homeobox domain	1.46	1.09	1.25	0.91	0.65	0.97	1.51	1.39	1.37	3.22	2.76	2.75
TR2715_c0_g3	Homeobox	Homeobox domain	1.33	2.01	1.91	0.83	0.7	0.81	0.77	0.63	0.53	0.46	0.48	0.42
TR3306_c2_g1	Homeobox	Homeobox domain	11.78	11.73	13.5	4.8	4.45	4.83	9.81	10.02	9.84	3.9	4.54	5.13
TR3838_c0_g3	Homeobox	Homeobox domain	10.69	11.91	10.45	13.05	12.49	12.67	7.87	7.77	8.64	1.97	1.88	2.25
TR4436_c4_g1	Homeobox	Homeobox domain	2.8	2.97	2.91	2.92	3.05	2.52	3.92	2.88	2.42	1.13	1.24	1.36
TR4671_c1_g1	Homeobox	Homeobox domain	2.74	2.93	2.81	0.96	1.09	1.64	0.36	0.21	0.07	0.62	0.65	0.98
TR10146_c0_g2	HSF_DNA-bind	HSF-type DNA-binding	0.1	0.36	0.24	0.21	0.28	0.29	3.38	2.97	2.3	0.5	0.48	0.36
TR2978_c2_g1	HSF_DNA-bind	HSF-type DNA-binding	12.3	12.04	7.07	57.79	19.62	15.54	6.78	4.05	6.8	3.72	3.6	0.15
TR31218_c0_g1	HSF_DNA-bind	HSF-type DNA-binding	8.66	8.79	8.98	6.4	6.72	6.98	8.91	8.92	8.99	2.42	2.09	2.14
TR3940_c0_g1	HSF_DNA-bind	HSF-type DNA-binding	23.34	23.3	24.92	11.91	11.89	12	5.14	5.4	5.79	1.38	1.35	1.1
TR3940_c0_g2	HSF_DNA-bind	HSF-type DNA-binding	6.84	8.48	7.3	11.78	12.01	10.86	1.87	2.24	2.78	1.1	0.88	0.83
TR27769_c0_g1	HTH_3	Helix-turn-helix	8.41	8.81	9.87	6.6	6.64	6.34	4.8	6.24	4.15	1.05	1.06	1.58
TR60240_c1_g1	IRF	Interferon regulatory factor transcription factor	2.08	0.63	0.43	0.11	0.11	0.11	0.27	0.21	0	0.06	0.03	0.06
TR146117_c0_g1	MYC	Transcription factor MYC2	11.78	11.71	12.61	1.33	0.77	0.91	1.63	1.17	0.97	0.63	0.53	0.67
TR12532_c1_g1	NAM	No apical meristem (NAM) protein	11.62	10.78	11.47	3.57	4.43	4.33	5.13	5.84	6.91	3.6	4.38	4.31
TR1411_c0_g2	NAM	No apical meristem (NAM) protein	12.69	11.51	12.47	4.79	4.19	4.21	14.48	13.19	13.54	5.08	4.86	5.36
TR14195_c0_g3	NAM	No apical meristem (NAM) protein	2.06	3.93	3.25	1.69	1.19	1.32	3.67	4.56	9.14	1.53	1.09	1.52
TR1528_c3_g1	NAM	No apical meristem (NAM) protein	9.77	10	10.91	2.93	2.99	3.74	5.08	3.88	4.39	3.54	3.08	2.83
TR1875_c3_g1	NAM	No apical meristem (NAM) protein	15.85	18.93	16.88	23.78	23.71	24.41	13.02	12.28	12.05	5.14	5.7	5.06
TR1964_c0_g1	NAM	No apical meristem (NAM) protein	5.27	5.99	5.03	1.74	1.74	2.19	2.27	1.99	2.05	0.26	0.18	0.49
TR2086_c0_g1	NAM	No apical meristem (NAM) protein	66.71	70.58	67.19	54.32	52.46	54.77	32.22	32.46	32.63	12.18	11.34	12.69
TR21250_c0_g1	NAM	No apical meristem (NAM) protein	0.81	0.73	0.84	0.02	0.03	0.03	0.31	0.28	0.18	0.13	0.12	0.09
TR2161_c0_g1	NAM	No apical meristem (NAM) protein	3.05	3.14	3.27	1.33	1.58	1.47	1.49	1.63	1.13	2.15	1.48	2.09
TR38904_c0_g1	NAM	No apical meristem (NAM) protein	0.39	0.1	0.2	0.47	0.57	0.49	2.08	2.38	2.59	3.05	2.78	2.17
TR4664_c0_g1	NAM	No apical meristem (NAM) protein	18.19	15.75	15.48	46.22	44.65	45.14	62.25	63.67	69.17	62.57	67.29	58.08
TR6417_c0_g1	NAM	No apical meristem (NAM) protein	3.33	3.2	3.03	1.42	1.35	0.88	1.05	1.17	1.84	2.1	2.21	2.13
TR6572_c0_g1	NAM	No apical meristem (NAM) protein	8.13	7.17	7.47	11.87	10.62	11.25	2.46	1.93	2.43	0.66	0.49	0.37
TR7250_c0_g1	NAM	No apical meristem (NAM) protein	0.41	0.31	0.42	2.73	2.65	1.77	6.09	7.23	5.56	2.57	2.54	2.88
TR990_c1_g1	NAM	No apical meristem (NAM) protein	4.1	4.58	4.26	7.69	9.34	9.45	2.2	2.4	2.89	0.19	0.36	0.19
TR37975_c0_g1	Not1	CCR4-Not complex component, Not1	1.15	0.4	0.28	0.07	0.02	0.08	0.1	0.14	0.04	0.05	0.04	0.05
TR18199_c0_g1	SAND	SAND domain	1.36	0.34	0.26	0.03	0	0	0.09	0.08	0.05	0	0.05	0
TR60348_c0_g1	SAND	SAND domain	1.6	0.19	0.71	0.04	0	0.11	0.33	0.1	0.06	0.07	0	0
TR10049_c1_g1	SBP	SBP domain	0.94	0.84	1.39	1.44	1.05	1.56	0.29	0.44	0.69	0.97	0.79	0.82
TR186_c0_g1	SBP	SBP domain	14.73	15.4	15.91	37.81	37.74	38.32	104.67	106.8	104.61	176.4	174.14	169
TR4235_c0_g1	SBP	SBP domain	10.09	10.74	11.8	4.25	4.27	5.36	3.64	3.65	3.56	2.51	1.61	2.08
TR1397_c2_g1	SRF-TF	SRF-type transcription factor (DNA-binding and dimerisation domain)	4	4.18	4.03	1.45	1.14	0.86	2.18	2.26	2.2	6.14	6.75	6.71
TR14177_c0_g1	SRF-TF	SRF-type transcription factor (DNA-binding and dimerisation domain)	0	0.04	0	0.03	0	0.05	5.77	5.1	5.84	0.36	0.09	0.18
TR1983_c0_g1	SRF-TF	SRF-type transcription factor (DNA-binding and dimerisation domain)	2.55	1.65	2.68	7.88	7.54	8.86	9.9	9.55	8.8	7.65	9.21	8.59
TR25044_c0_g1	SRF-TF	SRF-type transcription factor (DNA-binding and dimerisation domain)	1.17	0.87	0.79	0.4	0.41	0.07	0.57	0.86	0.81	5.17	4.37	3.35
TR5424_c1_g2	SRF-TF	SRF-type transcription factor (DNA-binding and dimerisation domain)	1.45	1.27	1.5	2.74	2.52	2.6	2.39	2.87	2.92	1.02	0.84	0.69
TR7721_c0_g1	SRF-TF	SRF-type transcription factor (DNA-binding and dimerisation domain)	2.93	3.01	3.12	5.52	6.03	5.66	1.64	1.93	2.15	0.99	1.09	1.28
TR87119_c0_g1	SRF-TF	SRF-type transcription factor (DNA-binding and dimerisation domain)	0	0	0.09	0	0	0	0.82	0.88	0.37	0	0.11	0
TR97487_c0_g1	SRF-TF	SRF-type transcription factor (DNA-binding and dimerisation domain)	0.04	0	0.08	0	0	0.08	0.77	1.26	1.26	0.3	0.36	0.35
TR1108_c5_g2	TCP	TCP family transcription factor	6.96	7.21	7.67	14.68	16.65	16.55	11.44	13.13	11.93	18.89	20.96	19.2
TR3395_c2_g2	TCP	TCP family transcription factor	2.01	2.14	1.85	4.12	3.31	5.31	1.63	2.37	1.45	3.17	2.61	2.77
TR5069_c0_g3	TCP	TCP family transcription factor	1.66	2.22	2.1	4.01	3.75	3.67	3.42	3.47	3.41	5.66	6.19	6.26
TR10769_c0_g1	WRKY	WRKY DNA -binding domain	62.19	57.76	62.12	38.58	36.26	37.11	47.78	49.7	45.09	8.03	8.22	8.29
TR14538_c0_g2	WRKY	WRKY DNA -binding domain	1.86	2.34	2.88	2.16	2.1	2.46	2.24	1.87	2.15	0.44	0.57	0.44
TR1969_c2_g1	WRKY	WRKY DNA -binding domain	5.53	8.96	8.93	8.59	8.88	9.43	10.97	13.1	11.26	29.62	31	28.43
TR20345_c0_g1	WRKY	WRKY DNA -binding domain	0	0.06	0.14	0.85	0.45	0.39	0.64	0.84	0.48	0.22	0.29	0.26
TR26488_c0_g1	WRKY	WRKY DNA -binding domain	7.14	8.05	6.82	4.48	4.89	5.15	0.88	0.98	0.77	0.25	0.08	0
TR36062_c0_g1	WRKY	WRKY DNA -binding domain	2.69	2.39	2.56	2	1.96	2.51	0.56	0.51	0.37	0.12	0.03	0.06
TR36179_c0_g1	WRKY	WRKY DNA -binding domain	16.37	16.35	16.29	7.19	7.74	7.13	4.83	5.85	6.7	0.86	1	0.98
TR3695_c2_g1	WRKY	WRKY DNA -binding domain	54.14	55.61	58.13	36.07	35.8	34.02	85.86	89.04	100.12	62.32	63.52	60.43
TR40295_c0_g1	WRKY	WRKY DNA -binding domain	2.89	2.47	2.94	1.59	1.35	1.46	1.8	1.78	1.15	0.15	0.12	0.2
TR4704_c0_g3	WRKY	WRKY DNA -binding domain	5.77	7.29	6.23	7.78	6.76	7.46	3.79	4.57	3.75	1.19	1.24	1.03
TR7981_c0_g1	WRKY	WRKY DNA -binding domain	5.4	5.59	4.31	4.18	5.11	4.09	1.33	1.76	1.39	0.6	0.97	1.13
TR8480_c0_g1	WRKY	WRKY DNA -binding domain	2.39	2.68	3.06	3.07	3.25	3.17	1.21	1.51	1.11	0.83	1.08	0.75
TR64732_c0_g1	YABBY	YABBY protein	4.19	3.95	4.94	7.87	6.4	5.37	1.49	2.51	2.47	3.38	2.82	2.58
TR12186_c1_g1	zf-A20	A20-like zinc finger	2.73	0.74	0.63	0.06	0.17	0.12	0.3	0.31	0.1	0.07	0.07	0.1
TR5746_c0_g1	zf-A20	A20-like zinc finger	5.47	6.09	5.72	1.47	2.12	1.66	3.12	2.6	2.04	1.85	1.4	2.07
TR10666_c0_g1	zf-C2H2	Zinc finger, C2H2 type	2.52	0.47	0.41	0.13	0.13	0.13	0.89	0.35	0.14	0.33	0.11	0.17
TR8370_c0_g1	zf-C2H2	Zinc finger, C2H2 type	1.14	0.84	1.25	2.66	2.39	2.39	2.02	2.26	1.67	2	1.64	1.62
TR13449_c0_g1	zf-C4	Zinc finger, C4 type (two domains)	2.18	0.31	0.75	0.02	0.24	0.19	0.47	0.21	0.06	0.1	0.03	0.07
TR104_c0_g1	zf-C5HC2	C5HC2 zinc finger	37.83	39.28	39.41	34.36	33.76	34.67	40.44	39.52	42.35	6.6	6.38	7
TR113_c4_g2	zf-Dof	Dof domain, zinc finger	9.57	9.66	10.95	27.65	26.52	28.51	8.22	10.35	8.71	4.68	4.48	4.54
TR1249_c0_g1	zf-Dof	Dof domain, zinc finger	3.51	3.67	3.3	2.01	2.14	1.75	4.96	4.15	4.35	2.46	2.18	2.12
TR19_c2_g1	zf-Dof	Dof domain, zinc finger	9.6	8.47	9.59	7.69	6.81	6.92	2.07	2.63	2.09	1.71	1.58	1.6
TR2938_c1_g2	zf-Dof	Dof domain, zinc finger	33.62	30.03	36.81	36.04	37.32	39.46	18.77	18.72	17.98	17.31	17.96	16.61
TR477_c1_g1	zf-Dof	Dof domain, zinc finger	26.96	27.51	27.65	36.03	34.47	36.49	18.26	17.47	17.2	19.62	19.87	20.13
TR477_c1_g2	zf-Dof	Dof domain, zinc finger	1.84	2.14	1.78	2.28	2.34	2.08	10.47	9.24	9.29	1.93	1.99	1.44
TR5908_c0_g1	zf-Dof	Dof domain, zinc finger	32.43	32.7	34.47	20.32	22.56	21.9	12.13	11.58	10.31	7.64	7.28	9.89
TR6272_c0_g2	zf-Dof	Dof domain, zinc finger	3.02	2.61	3.61	3.88	3.05	3.02	4.23	4.01	4.65	7.07	7.86	7.79
TR2781_c0_g2	zf-NF-X1	NF-X1 type zinc finger	22.89	25.12	23.65	27.16	27.13	27.06	13.07	13.48	14.19	10.9	11.02	11.39
TR7156_c0_g1	zf-TAZ	TAZ zinc finger	1.2	1.35	1.21	0.68	0.64	0.79	1.65	1.48	1.4	2.28	1.53	1.68
TR336_c0_g1	Zim	ZIM motif	3.54	3.76	3.54	2.33	2.45	2.12	4.03	4.49	3.17	1.69	1.61	1.38
TR4926_c2_g2	Zim	ZIM motif	13.79	14.01	14.04	1.78	1.57	2.02	3.54	4.11	3.73	2.04	1.97	2.17
TR61977_c0_g1	Zim	ZIM motif	0.9	0.99	1.5	0.34	0.22	0.38	0.39	0.5	0.47	0.67	0.52	0.52
TR7417_c1_g1	Zim	ZIM motif	41.12	43.3	46.5	15.84	15.61	15.53	10.39	10.57	10.75	4.41	3.57	3.41
TR8086_c0_g1	Zim	ZIM motif	15.24	14.97	16.39	7.66	7	7.98	5.49	5.11	4.38	1.76	1.43	1.36

## Sheet: Sheet2
gene_id	Family	Family_name	FPKM_ G1	FPKM_ G2	FPKM_ G3	FPKM_ T1	FPKM_ T2	FPKM_ T3	FPKM_ P1	FPKM_ P2	FPKM_ P3	FPKM_ C1	FPKM_ C2	FPKM_ C3
TR4878_c0_g1	ERF	Ethylene-responsive transcription factor	4.24	4.75	3.44	0.56	1.21	0.79	0.57	0.6	0.77	0.49	0.64	0.28
TR4986_c5_g1	ERF	Ethylene-responsive transcription factor	17.61	20.18	19.73	3.1	3.9	4.17	0.88	0.65	1.03	1.51	1.35	1.38
TR5163_c0_g1	ERF	Ethylene-responsive transcription factor	15.83	17.49	16.8	11.95	13.04	13.39	24.37	25.09	26.89	69.37	65.52	63.73
TR5349_c0_g1	ERF	Ethylene-responsive transcription factor	0.58	0.46	0.25	0.42	0.27	0.48	0.49	0.32	0.29	1.55	1.82	1.95
TR6543_c0_g1	ERF	Ethylene-responsive transcription factor	17.65	17.23	18.9	4.96	4.6	5.02	5.25	4.49	4.83	4.87	5.2	4.39
TR671_c3_g1	ERF	Ethylene-responsive transcription factor	52.01	45.02	44.72	32.17	30.33	33.9	31.74	32.63	32.11	6.63	5.17	5.26
TR908_c1_g3	ERF	Ethylene-responsive transcription factor	59.01	60.06	63.8	37.1	38.27	38.48	20.48	18.42	17.13	7.07	5.61	7.1
TR908_c4_g1	ERF	Ethylene-responsive transcription factor	399.69	425.23	415.41	383.04	361.96	369.82	363.38	370.45	358.42	146.66	140.96	150.3
TR9524_c0_g1	ERF	Ethylene-responsive transcription factor	18.29	20.72	19.93	4.8	7.7	6.11	12.35	12.92	12.26	8.93	8	6.92
TR10196_c0_g1	ERF	Ethylene-responsive transcription factor	10.91	10.45	9.7	5.82	5.52	7.39	7.6	5.74	7.33	1.28	1.31	1.45
TR1059_c5_g1	ERF	Ethylene-responsive transcription factor	41	41.99	47.01	16.58	15.28	16.4	17.35	16.5	14.52	13.17	11.04	13.22
TR11729_c0_g2	ERF	Ethylene-responsive transcription factor	0.29	0.29	0.63	0.12	0.16	0.12	0.25	0.52	0.26	3.51	3.25	3.35
TR1182_c0_g1	ERF	Ethylene-responsive transcription factor	6.57	6.2	6.22	2.02	2.32	1.86	2.49	2.55	2.25	0.37	0.4	0.56
TR1182_c0_g2	ERF	Ethylene-responsive transcription factor	47.18	45.71	55.47	63.48	58.63	61.1	8.24	9.86	8.34	1.89	2	3.04
TR12184_c0_g1	ERF	Ethylene-responsive transcription factor	8.27	8.95	8.84	7.46	8.6	7.88	1.57	1.65	1.63	2.24	2.08	2.4
TR1231_c8_g1	ERF	Ethylene-responsive transcription factor	36.94	43.2	40.71	16.47	14.72	15.81	16.24	14.22	14.8	12.27	9.13	12.43
TR16697_c1_g1	ERF	Ethylene-responsive transcription factor	156.88	159.79	173.41	142.68	140.44	145.15	70.51	63.86	69.58	61.57	66.86	71.3
TR19368_c0_g2	ERF	Ethylene-responsive transcription factor	0.21	0.2	0.21	0.34	0.2	0.24	1.3	1.43	1.68	0.6	0.54	0.48
TR19914_c0_g1	ERF	Ethylene-responsive transcription factor	6.27	6.9	9.58	6.94	6.51	6.32	6.83	7.07	7	2.44	2.99	2.85
TR2325_c0_g1	ERF	Ethylene-responsive transcription factor	2.75	3.24	2.79	1.27	1.8	1.1	3.67	4.24	3.79	2.18	2.36	2.14
TR2327_c1_g1	ERF	Ethylene-responsive transcription factor	3.45	3.7	4.1	1.14	1.03	0.84	2	1.85	1.35	0.28	0.5	0.57
TR26204_c0_g1	ERF	Ethylene-responsive transcription factor	4.89	5.61	5.89	0.7	1.08	0.86	1.92	2.28	2.06	1.15	0.92	1
TR2843_c2_g1	ERF	Ethylene-responsive transcription factor	11.04	10.6	10.45	1.04	1.26	1.12	0.74	0.68	0.65	0.84	0.47	0.49
TR31039_c0_g1	ERF	Ethylene-responsive transcription factor	18.32	18.48	19.97	6.78	7.2	7.34	11.8	12.71	11.59	5.54	6.15	5.58
TR3147_c0_g1	ERF	Ethylene-responsive transcription factor	17.58	17.31	15.65	5.15	6.24	5.95	13.82	16.24	13.32	13.64	12.74	13.44
TR3333_c0_g1	ERF	Ethylene-responsive transcription factor	154.67	154.46	165.58	75.8	70.75	76.19	30.98	30.59	32.84	10.02	10.05	10.84
TR35110_c0_g1	ERF	Ethylene-responsive transcription factor	0.91	0.98	1.45	0.77	1.17	1.11	0.23	0.32	0.4	0.33	0.16	0.05
TR3521_c2_g1	ERF	Ethylene-responsive transcription factor	4.19	3.47	4.03	0.88	1.26	1.04	0.92	0.7	0.34	0	0.08	0
TR3689_c0_g1	ERF	Ethylene-responsive transcription factor	4.09	3.02	3.39	2.44	3.07	2.56	9.69	9.11	9.63	2.42	2.05	1.49
