# Supplementary material for: Integrative Metabolomic and Transcriptomic Landscape during Akebia trifoliata Fruit Ripening and Cracking
Source: Int J Mol Sci. 2023 Nov 24;24(23):16732. doi: 10.3390/ijms242316732 (PMC10706055; doi:10.3390/ijms242316732)
Supplement: Supplementary file 1 [file ijms-24-16732-s001.zip › Table S6.xlsx]

## Sheet: Y_loading
Y	Loading_1	Loading_2
TR17248_c0_g1	3.34979e-05	-0.0232772
TR95403_c0_g1	0.000715903	-0.0232109
TR43_c0_g1	0.000415973	-0.0232122
TR20185_c0_g1	-0.000367181	-0.0232067
TR38520_c0_g2	-0.000741363	-0.0231799
TR48354_c0_g1	9.13262e-05	-0.0231717
TR5679_c1_g2	-0.00027596	-0.0231591
TR3178_c0_g3	-5.25281e-05	-0.023153
TR8129_c0_g1	0.0023793	-0.0230265
TR344_c17_g1	0.000374187	-0.0231437
TR3399_c1_g1	8.34038e-05	-0.0231429
TR2290_c0_g1	-0.000842756	-0.023122
TR8456_c0_g2	-0.000916445	-0.0231163
TR12088_c0_g1	-0.000244036	-0.0231309
TR16147_c0_g1	0.00303573	-0.0229006
TR97_c3_g1	-0.00113503	-0.0230707
TR921_c2_g1	-0.000597964	-0.0230903
TR12978_c1_g1	-4.63494e-05	-0.0230968
TR20204_c0_g1	0.001477	-0.0230409
TR7164_c0_g1	0.000288171	-0.0230844
TR2950_c2_g1	0.00117107	-0.0230466
TR25371_c0_g1	-0.000259115	-0.0230748
TR7556_c0_g2	-0.000295028	-0.0230731
TR335_c0_g8	0.00266013	-0.0228863
TR11359_c0_g1	-0.0012799	-0.022995
TR18303_c0_g1	0.000278194	-0.0230252
TR1515_c0_g2	-0.00182103	-0.022952
TR19697_c0_g1	-0.00251875	-0.0228856
TR66703_c0_g1	-0.00431024	0.0226141
TR29619_c0_g1	-0.000595635	-0.0230107
TR18759_c0_g1	0.00349025	-0.0227514
TR570_c0_g1	-0.00128396	-0.0229805
TR45025_c0_g1	0.00110667	-0.022986
TR39562_c1_g1	0.00333475	-0.0227693
TR964_c0_g1	0.00154657	-0.0229588
TR6244_c0_g1	-0.00187877	-0.0229193
TR282_c0_g2	-0.000420975	-0.0229916
TR16746_c0_g1	0.00318823	-0.0227705
TR49665_c0_g1	-0.000138592	-0.0229838
TR7617_c1_g1	-0.00121558	-0.0229518
TR6443_c0_g1	-0.00193676	-0.0228978
TR4508_c0_g1	0.000150648	-0.0229786
TR193_c3_g1	-0.000466675	-0.0229683
TR43510_c0_g1	0.00148602	-0.0229107
TR25758_c0_g1	-0.000568434	-0.0229513
TR16424_c0_g1	0.000395537	-0.0229499
TR19203_c0_g1	-0.00267762	-0.0227955
TR43400_c0_g1	-0.00207789	-0.0228577
TR9419_c0_g1	0.00170481	0.0228863
TR3693_c3_g1	0.00310707	-0.0227373
TR8808_c0_g1	-0.000173988	-0.0229477
TR5925_c1_g1	-0.000243482	-0.0229311
TR3873_c0_g1	-0.000911976	-0.022906
TR18679_c0_g1	-0.000722284	-0.0229069
TR3659_c4_g1	0.000123268	-0.0229137
TR17860_c0_g1	0.00182289	-0.0228394
TR1954_c0_g2	-0.00154928	-0.0228565
TR4278_c1_g1	0.000255823	-0.0229008
TR13733_c2_g2	0.00242958	-0.0227729
TR4821_c0_g1	-0.0031187	-0.0226888
TR43490_c0_g1	-0.000319647	-0.0228892
TR25414_c1_g3	0.000136678	-0.0228882
TR5183_c0_g1	-0.000910205	-0.0228663
TR16586_c1_g1	-0.0033189	-0.0226376
TR58065_c0_g1	4.4915e-05	-0.0228695
TR2290_c1_g1	-0.0021841	-0.0227584
TR15886_c0_g2	0.000458058	-0.0228521
TR7713_c0_g1	-0.002613	-0.0226958
TR3942_c0_g1	-0.00303004	-0.0226343
TR283_c0_g1	0.00401465	-0.0224764
TR208_c1_g1	0.00189834	-0.0227469
TR47196_c0_g1	0.000538379	-0.0228139
TR1305_c2_g1	-0.00332721	-0.0225712
TR9534_c0_g1	0.000308547	0.0228108
TR20252_c0_g1	0.000571701	-0.0228042
TR6655_c0_g1	0.000719355	-0.0227933
TR36594_c0_g1	0.00130671	-0.0227597
TR12450_c0_g1	0.000174564	-0.022793
TR74303_c0_g2	-0.00276454	-0.0226246
TR56708_c0_g1	0.00277588	-0.022617
TR3116_c0_g2	-0.000856332	-0.0227659
TR1724_c0_g1	-0.00131456	-0.022743
TR42_c0_g1	-0.00403072	-0.0224188
TR95309_c0_g1	0.000548822	-0.0227706
TR8823_c0_g1	0.000298426	-0.0227745
TR24655_c0_g1	-0.000254292	-0.0227747
TR15252_c0_g1	0.00148218	-0.0227177
TR35874_c0_g1	0.000383011	-0.0227509
TR8013_c0_g1	-0.00205212	-0.0226518
TR79387_c0_g1	-0.00119474	-0.0227059
TR102116_c0_g1	0.000105513	-0.0227326
TR14570_c0_g1	0.00198906	-0.0226358
TR2266_c1_g1	-0.00344797	-0.0224598
TR227_c1_g2	2.16557e-05	-0.0227229
TR113_c6_g1	0.0021128	-0.0226227
TR3519_c1_g1	-0.00186951	-0.0226365
TR32451_c0_g1	0.00388435	-0.0223725
TR27132_c0_g1	0.000732533	-0.0226901
TR61500_c0_g2	0.000686604	-0.022685
TR782_c2_g1	0.000820764	-0.0226774
TR36502_c0_g1	-0.000964897	-0.0226712
TR1331_c2_g2	0.00506106	-0.0221197
TR8607_c1_g1	-0.0036866	-0.0223896
TR10188_c0_g1	-0.00228127	-0.0225696
TR13460_c0_g1	0.000521402	-0.0226631
TR810_c1_g1	-0.00333994	-0.0224207
TR10817_c0_g2	-0.00231532	-0.0225442
TR7088_c0_g1	0.00292579	-0.0224605
TR6252_c0_g1	0.00328689	-0.0224094
TR15361_c0_g1	-0.00110217	-0.0226215
TR17663_c0_g1	-0.00403596	-0.0222856
TR20653_c0_g1	0.00625563	-0.0217501
TR6402_c0_g1	-0.00109533	-0.0225994
TR64567_c0_g1	0.000416865	-0.0226186
TR602_c1_g3	-0.00448969	-0.0221657
TR597_c0_g3	0.00231902	-0.0224931
TR10444_c0_g1	-0.00289812	-0.0224218
TR207794_c0_g1	-0.000789047	-0.0225893
TR251_c0_g1	-0.00294485	-0.0224088
TR30578_c0_g1	-0.00134585	-0.0225477
TR5394_c1_g1	0.000217374	-0.0225865
TR113_c4_g2	-0.00381662	-0.0222592
TR762_c0_g1	-0.00277492	-0.0224026
TR4835_c0_g1	-0.00118245	-0.022537
TR701_c15_g1	-0.000232015	-0.0225664
TR34403_c0_g1	0.00156669	-0.0225131
TR35590_c1_g1	0.000332047	-0.0225643
TR55628_c1_g1	-0.00137359	-0.0225229
TR53907_c0_g1	0.00493933	-0.022017
TR20053_c0_g1	-0.00107965	-0.0225377
TR19368_c0_g1	-0.00484678	0.0220332
TR7500_c0_g1	7.19713e-05	-0.0225597
TR13546_c0_g1	0.00123147	-0.0225249
TR32882_c0_g1	0.00379951	0.0222339
TR6705_c0_g1	-0.00126221	-0.0225164
TR454_c0_g2	0.00388837	-0.0222058
TR7970_c5_g1	-0.000418531	-0.0225373
TR32338_c0_g1	-0.00327648	-0.0223005
TR21990_c0_g1	0.00285603	-0.0223567
TR12834_c0_g1	0.000166485	-0.022536
TR845_c3_g2	-0.000270131	-0.0225334
TR35588_c0_g1	-0.00239332	-0.022407
TR25237_c0_g1	0.00437397	-0.0221048
TR3278_c0_g2	-0.00205462	-0.0224388
TR14074_c1_g2	0.00212046	-0.0224286
TR12907_c0_g2	7.59672e-05	-0.0225235
TR121102_c0_g1	0.00372111	-0.0222122
TR56734_c0_g1	0.00195641	-0.0224263
TR132928_c0_g1	-0.00068642	-0.0224847
TR87520_c0_g1	-0.000652411	-0.0224832
TR7459_c0_g1	0.00574527	-0.0217342
TR57360_c0_g1	0.00411183	-0.0220991
TR3539_c5_g1	0.00202345	-0.022384
TR25276_c0_g1	0.00340366	0.0222141
TR7463_c0_g1	0.00331274	0.022227
TR20598_c0_g1	0.000116264	-0.0224706
TR50753_c0_g1	0.0040775	-0.0220924
TR43929_c1_g1	0.000159684	-0.0224608
TR33670_c0_g4	0.000306591	-0.0224445
TR8589_c0_g1	0.00221608	-0.02233
TR28719_c0_g2	-0.000533127	-0.0224284
TR16570_c0_g1	-0.00154348	-0.0223786
TR15601_c3_g1	0.00261812	-0.0222732
TR13513_c0_g2	-0.000659233	-0.0224101
TR64633_c0_g1	0.00169329	-0.0223534
TR6637_c0_g1	-0.00177464	-0.0223454
TR26235_c0_g1	0.000739774	-0.0223932
TR36399_c0_g1	0.00189256	-0.0223253
TR121102_c0_g2	0.000834561	-0.0223896
TR3332_c0_g1	0.00163022	-0.0223359
TR15946_c0_g3	-0.00406663	-0.02201
TR125574_c0_g1	-0.000249908	-0.022372
TR1238_c3_g1	0.00170562	-0.0222986
TR40290_c1_g1	0.000865071	-0.0223464
TR6105_c7_g1	0.000852434	-0.0223433
TR9293_c0_g1	0.000665135	-0.0223472
TR30686_c0_g1	0.00364575	-0.022054
TR18391_c0_g1	-0.000291661	-0.0223513
TR1120_c1_g2	-4.30976e-06	-0.0223505
TR6038_c0_g1	0.000218614	-0.0223489
TR10209_c2_g2	-0.00582876	-0.0215764
TR8229_c0_g1	0.00344904	-0.0220801
TR10588_c0_g1	-0.00302781	-0.0221405
TR3585_c0_g1	-0.00275703	-0.0221681
TR49937_c0_g1	-0.000717123	-0.0223231
TR3962_c0_g2	-0.0053291	-0.0216895
TR31647_c0_g1	0.001531	-0.0222678
TR15830_c1_g1	-0.000150526	-0.0223147
TR32132_c0_g1	-0.00477744	-0.0217949
TR6881_c0_g1	-0.00377713	-0.0219882
TR728_c2_g1	1.45783e-05	-0.0223093
TR18229_c1_g1	-0.00457262	-0.0218248
TR1753_c4_g1	-0.0014191	-0.0222527
TR21485_c0_g1	-0.000316455	-0.0222838
TR2433_c1_g1	0.00498564	0.02172
TR4179_c4_g1	0.00194036	-0.0221967
TR5668_c0_g1	-0.00452874	-0.0218117
TR4159_c1_g1	-0.00239144	-0.0221445
TR31843_c0_g3	-0.00201501	-0.0221775
TR1954_c0_g1	-0.000952487	-0.0222465
TR38082_c0_g1	0.000500093	-0.0222478
TR6202_c0_g1	0.00306909	0.0220371
TR18209_c0_g1	-0.000872143	-0.0222309
TR5540_c0_g1	-0.000643093	-0.0222368
TR15456_c1_g1	0.00247398	-0.022105
TR13075_c2_g1	-0.00426801	-0.0218248
TR4299_c11_g1	-0.000651208	-0.0222265
TR9817_c0_g1	-0.00526461	-0.021603
TR11616_c0_g1	-0.00586441	-0.0214456
TR1120_c1_g1	-0.00636754	-0.0212881
TR6065_c1_g1	-0.00265841	-0.0220603
TR52299_c0_g1	-0.000798328	-0.0221942
TR9726_c0_g1	-0.0048544	-0.0216684
TR12071_c7_g2	0.00243003	-0.0220693
TR8195_c0_g1	0.0042779	0.0217862
TR76773_c0_g1	-0.00353722	-0.0219135
TR1353_c6_g1	-0.00649938	-0.021224
TR15767_c0_g1	0.000334071	-0.0221906
TR416_c5_g2	-0.0015399	-0.0221369
TR1213_c0_g1	0.00461538	-0.0217023
TR9514_c0_g2	-0.00167703	0.0221241
TR11761_c0_g1	0.00213103	-0.0220771
TR2356_c0_g1	-0.00598201	-0.0213526
TR5726_c0_g1	0.00578408	0.0213966
TR14456_c0_g1	0.00506691	0.0215761
TR6686_c0_g1	-0.00637435	-0.0212228
TR6007_c4_g1	-0.000206231	-0.0221553
TR28261_c0_g3	0.00184025	-0.022076
TR17645_c0_g1	0.00460584	-0.0216644
TR6076_c0_g1	0.00754289	-0.0208242
TR8568_c0_g1	-0.00570318	-0.0213965
TR168961_c0_g1	0.000121948	-0.0221347
TR646_c0_g3	0.00615572	-0.0212572
TR1616_c0_g2	-0.0021118	-0.0220268
TR132977_c0_g1	-0.000122655	-0.022124
TR37111_c0_g1	0.00162893	-0.0220616
TR3306_c3_g1	-0.00233849	-0.0219959
TR778_c2_g1	9.59819e-05	-0.0221168
TR3147_c0_g1	-0.00475344	0.0215999
TR9625_c0_g1	0.00481633	-0.0215854
TR53158_c0_g1	0.0044455	-0.0216645
TR15193_c0_g1	-0.000809287	-0.0220988
TR39694_c0_g1	-0.0035788	-0.0218216
TR65009_c0_g1	-0.00312985	-0.0218813
TR8608_c0_g1	-0.00410939	-0.0217181
TR293_c0_g1	0.00370772	-0.0217846
TR6292_c1_g1	-0.000179256	-0.022097
TR15823_c0_g1	-0.00555501	-0.0213642
TR13067_c0_g1	-0.00589048	-0.0212647
TR19813_c0_g1	0.000393245	-0.0220615
TR3458_c0_g1	0.00178571	-0.0219839
TR2271_c1_g1	0.0045413	-0.0215738
TR6021_c0_g1	-0.0072413	-0.0208214
TR7617_c1_g2	-0.00425297	-0.0216229
TR23119_c0_g1	-0.0011768	-0.0220051
TR129496_c0_g1	-0.00100518	-0.0220119
TR16457_c0_g1	-0.00294407	-0.0218352
TR13506_c1_g1	0.00453578	0.0215511
TR38438_c1_g1	0.000824877	-0.0219964
TR23813_c0_g2	-2.23035e-05	-0.0220116
TR8751_c0_g1	-0.00496747	-0.0214417
TR354_c0_g1	-0.00153466	-0.021956
TR40661_c0_g1	-0.00486037	-0.0214651
TR53931_c0_g1	-0.000415134	-0.0220021
TR27719_c0_g1	-0.00551203	-0.021298
TR78882_c0_g1	0.00122053	-0.0219647
TR12057_c1_g2	0.000416591	-0.0219941
TR19876_c0_g1	-0.00491653	-0.0214333
TR7721_c0_g1	-0.00661412	-0.0209655
TR8959_c0_g1	-0.00464933	-0.0214751
TR64103_c0_g1	0.000447481	-0.0219676
TR9372_c0_g2	-0.0067752	-0.0208931
TR53187_c0_g1	0.000259294	-0.0219582
TR646_c3_g1	-0.00622991	-0.0210566
TR5638_c0_g1	-0.00165992	-0.0218945
TR6022_c1_g2	-0.00494644	-0.0213905
TR3670_c0_g1	0.000333208	0.0219304
TR18171_c0_g1	-0.00416682	-0.0215332
TR4676_c0_g1	-0.00683814	-0.020839
TR17665_c0_g1	-0.000365942	-0.021929
TR25603_c0_g1	-0.00249498	-0.0217847
TR9792_c0_g1	-0.00248649	-0.0217831
TR23524_c0_g1	0.00712756	0.0207311
TR15290_c0_g1	-0.00432455	-0.021487
TR25370_c0_g2	0.00383558	-0.0215749
TR16326_c0_g1	-0.00608257	0.0210467
TR57096_c0_g1	0.00334346	-0.0216496
TR3275_c0_g2	-0.00511419	-0.0212985
TR35439_c0_g1	0.00382324	-0.0215652
TR184_c9_g1	0.0033351	-0.0216457
TR4457_c3_g1	0.00481036	-0.0213655
TR1617_c0_g1	-0.00735299	-0.0206269
TR3021_c2_g2	-0.00179019	-0.0218202
TR2251_c0_g1	-0.00372014	-0.021573
TR14789_c0_g1	0.00045947	-0.0218865
TR6556_c0_g2	-0.00281647	-0.0217039
TR1948_c1_g1	-0.00133308	0.0218333
TR11576_c0_g1	0.00573316	0.0211033
TR4967_c0_g1	0.00609862	-0.021
TR48980_c0_g1	0.000350158	-0.0218617
TR1680_c2_g1	-0.00524678	-0.0212244
TR1594_c3_g1	0.00419679	-0.0214513
TR9961_c1_g1	0.0049561	0.0212864
TR6836_c0_g1	0.00289991	-0.0216601
TR33104_c0_g1	0.00351801	-0.0215656
TR2331_c3_g1	-0.00739087	-0.0205623
TR8935_c0_g2	-0.003806	-0.0215157
TR10347_c0_g1	-0.00546508	-0.0211433
TR20459_c0_g1	0.000419892	-0.0218291
TR7155_c0_g2	-0.00400051	-0.0214533
TR32057_c0_g1	-0.00431462	-0.021392
TR189_c2_g2	0.000769789	-0.0218051
TR8919_c0_g1	-0.00674863	0.0207462
TR4472_c1_g1	-0.00199729	-0.0217243
TR15635_c0_g1	-0.00437552	-0.0213725
TR32694_c0_g1	-0.00239153	-0.0216819
TR7014_c0_g1	0.00500029	-0.0212325
TR60614_c0_g1	-0.0014802	0.0217615
TR1122_c0_g2	-0.00636643	-0.0208595
TR8486_c0_g1	0.00289088	-0.0216139
TR28078_c0_g1	-0.00649161	0.0208162
TR4681_c0_g1	-0.00443618	-0.0213483
TR8727_c1_g2	-0.000479239	-0.0217984
TR4093_c0_g1	-0.00136764	-0.0217562
TR28673_c0_g1	-0.00478293	-0.0212673
TR11043_c0_g1	-0.00676173	-0.0207227
TR17129_c2_g1	-0.00714328	-0.0205908
TR5276_c2_g1	-0.0025409	-0.0216451
TR13093_c0_g1	0.00210729	-0.0216914
TR484_c0_g1	-0.0075569	-0.0204359
TR21565_c0_g1	0.00274022	-0.0216148
TR34082_c0_g1	0.00580425	-0.0209971
TR1936_c3_g1	3.77625e-05	-0.021778
TR3982_c0_g1	0.00236568	-0.0216461
TR1930_c4_g2	0.00478126	-0.0212415
TR1412_c0_g1	0.00760348	-0.0203986
TR12104_c0_g1	0.00144196	-0.0217191
TR5485_c0_g1	-0.00688527	-0.0206484
TR6620_c0_g1	0.00496892	-0.0211883
TR8069_c0_g1	0.000898484	-0.0217377
TR12072_c2_g1	0.0056946	-0.0209974
TR52850_c0_g2	0.00119941	-0.0217183
TR356_c0_g1	0.00558004	-0.0210179
TR20098_c2_g1	-0.00205139	-0.0216441
TR2501_c0_g1	0.00398885	0.0213718
TR30123_c0_g2	0.000222653	-0.0217375
TR8613_c0_g1	0.00701615	-0.0205743
TR17675_c1_g1	-0.00455473	-0.0212527
TR12018_c1_g1	0.00319625	-0.0214952
TR36388_c0_g1	-0.000971783	-0.0217089
TR18387_c0_g1	0.00438972	-0.021275
TR11162_c0_g1	0.00647789	-0.0207335
TR12692_c0_g1	-0.00176252	-0.021646
TR70327_c0_g1	0.00262047	-0.0215579
TR38909_c0_g1	0.00023401	-0.0217148
TR1603_c1_g3	0.00635159	-0.0207607
TR16814_c0_g3	0.00220214	-0.0215971
TR1875_c3_g2	-0.000438568	-0.0217042
TR81227_c0_g1	-0.000261462	-0.0216983
TR5638_c0_g2	-0.00258666	-0.021541
TR38148_c0_g1	0.00074687	-0.0216777
TR11215_c0_g1	0.00495249	0.0211149
TR3021_c1_g1	0.00401551	-0.0213113
TR11698_c0_g1	0.00563916	-0.0209394
TR1474_c0_g1	0.00299714	-0.0214714
TR55859_c1_g1	-0.000202074	-0.0216781
TR7245_c0_g2	-0.00779318	-0.0202296
TR3982_c0_g2	-0.00199554	-0.021585
TR4431_c0_g3	-0.00120272	-0.0216373
TR1714_c3_g1	0.00120782	0.0216304
TR8486_c2_g1	-0.000456849	-0.0216577
TR3209_c0_g1	-0.0021614	0.0215506
TR3390_c2_g1	-0.00294299	-0.0214545
TR701_c0_g1	0.00657719	-0.0206223
TR7815_c0_g1	-0.00907572	0.0196436
TR51777_c1_g1	-0.0025597	-0.0214769
TR2217_c0_g1	-0.0045488	-0.0211451
TR578_c2_g1	0.0053476	-0.0209555
TR7853_c0_g1	-0.00770031	-0.0202078
TR5326_c1_g1	0.00350571	-0.0213385
TR1098_c2_g1	-0.0010776	-0.0215947
TR39515_c0_g2	-0.00275208	-0.0214448
TR20526_c0_g3	-0.00333675	-0.0213595
TR11858_c0_g1	0.00472337	-0.0210941
TR10481_c0_g1	0.00323065	-0.0213723
TR8789_c0_g1	-0.00648191	-0.0206089
TR8677_c0_g1	-0.00469616	0.0210852
TR41676_c0_g1	-0.00579365	-0.0208042
TR2714_c0_g1	-0.0035283	0.0213032
TR22066_c0_g1	0.00107808	-0.0215629
TR45477_c0_g1	-0.00658686	-0.0205484
TR20537_c0_g1	-0.00147478	-0.0215199
TR1842_c1_g1	0.0032203	-0.0213263
TR1827_c0_g1	0.00745749	-0.0202365
TR325_c1_g3	-0.0044996	0.0210894
TR36_c2_g2	-0.00269124	-0.021392
TR990_c1_g1	-0.00773494	-0.0201135
TR33016_c0_g1	-0.00286163	-0.0213576
TR24967_c0_g1	-0.00504854	-0.0209426
TR3151_c1_g1	-0.0023688	-0.021408
TR26346_c0_g2	0.00553348	-0.0208046
TR11201_c2_g1	0.000392567	-0.0215229
TR14524_c0_g1	0.00258484	-0.021363
TR32043_c0_g1	-0.00715163	-0.0202932
TR21584_c0_g1	-0.00294963	-0.0213094
TR7517_c0_g2	-0.00127398	-0.0214705
TR11267_c1_g2	0.00311249	-0.0212792
TR8845_c1_g1	-0.00689522	-0.0203671
TR46703_c0_g1	-4.43107e-05	0.0215009
TR928_c0_g1	-0.00711504	-0.0202889
TR26876_c0_g1	-0.00289552	-0.0212997
TR110295_c2_g1	-0.0018883	-0.0214117
TR5413_c0_g1	0.00142817	0.0214429
TR18346_c0_g1	0.00320343	-0.0212421
TR46430_c0_g1	-0.00386926	-0.0211297
TR21112_c0_g1	-0.00848069	-0.0197356
TR29855_c0_g1	0.00701293	-0.0202911
TR1646_c8_g1	-0.00637885	-0.0204974
TR34913_c0_g1	0.00686316	-0.0203373
TR9249_c0_g1	-0.00558392	-0.0207138
TR908_c19_g1	0.00466846	-0.0209296
TR41310_c0_g3	0.00152238	-0.021388
TR9565_c0_g1	0.00377517	-0.0211049
TR10961_c0_g1	-0.00787428	-0.0199412
TR4286_c0_g1	-0.00686744	0.0203093
TR7866_c0_g1	-0.00872967	-0.0195785
TR42737_c0_g1	-0.00407407	-0.0210444
TR2362_c2_g1	0.00201284	-0.0213361
TR73652_c0_g1	-0.00304477	-0.0211946
TR14698_c1_g1	-0.00765287	-0.0199923
TR36_c3_g1	-0.00480745	-0.0208564
TR2804_c0_g2	-0.00732342	-0.0200948
TR79462_c0_g1	6.75226e-05	-0.0213846
TR4024_c2_g1	-0.00895732	-0.0194145
TR10767_c0_g1	0.00592813	-0.0205409
TR8556_c1_g1	0.00179432	0.0213005
TR3664_c1_g1	-0.00335039	-0.0211013
TR12389_c0_g2	0.00130693	-0.0213253
TR8029_c0_g1	-0.00750522	0.0199895
TR820_c0_g1	-0.00697072	-0.0201762
TR1759_c1_g1	-0.00829046	-0.0196614
TR7443_c0_g2	-0.00421815	-0.0209165
TR62804_c0_g1	-0.00218888	-0.0212244
TR9004_c1_g1	0.000873099	-0.0213137
TR23323_c0_g1	0.00197771	-0.021237
TR5614_c3_g1	-0.00810197	-0.0197253
TR5425_c1_g1	0.00859509	0.0195134
TR6512_c1_g1	-0.00581968	0.0205061
TR115773_c0_g2	0.00138592	-0.0212688
TR5015_c0_g1	-0.00514575	-0.0206828
TR338_c8_g1	0.00665021	-0.0202492
TR12204_c0_g1	0.00462939	-0.0208029
TR1449_c3_g1	-0.00843072	-0.0195617
TR5288_c0_g1	-0.00842405	-0.0195646
TR11580_c0_g1	0.0093303	0.0191452
TR10851_c0_g2	0.000377051	-0.0212911
TR341_c8_g1	-0.00807056	-0.0197024
TR14702_c0_g1	0.00273799	-0.0211143
TR15976_c0_g1	-0.00299725	-0.0210759
TR2649_c2_g1	-0.00530117	-0.020612
TR3782_c1_g1	0.0018209	-0.0212015
TR5552_c0_g1	-0.00862831	-0.0194513
TR4830_c0_g1	-0.0035514	-0.0209793
TR23573_c0_g1	0.00399593	-0.020893
TR5855_c1_g1	0.00309217	-0.0210399
TR5555_c0_g1	-0.00863881	-0.0194289
TR17453_c0_g1	-0.00199466	-0.0211624
TR12524_c0_g1	-0.00438657	-0.0207975
TR8965_c0_g1	-0.0064194	-0.0202613
TR5644_c0_g1	-0.00736416	-0.0199331
TR14203_c0_g1	1.44979e-05	-0.0212433
TR57114_c0_g1	0.00553893	-0.0205075
TR2392_c1_g1	-0.0096211	-0.0189357
TR63289_c0_g1	0.00405357	-0.0208419
TR10064_c1_g1	0.00941846	-0.0190268
TR4056_c0_g2	0.000610161	0.0212179
TR70900_c0_g1	-0.0083477	-0.0195101
TR35194_c0_g1	-0.00319492	0.0209708
TR3348_c0_g1	0.0080824	-0.0196035
TR6944_c0_g1	-0.0042828	0.0207584
TR8284_c1_g2	-0.000288002	0.0211932
TR3218_c0_g1	-0.00939655	-0.018985
TR7447_c1_g1	0.0100554	-0.0186392
TR12608_c1_g1	-0.00257672	-0.0210187
TR2345_c0_g1	0.0085313	-0.0193808
TR1736_c1_g1	-0.00388634	-0.0208133
TR10126_c2_g1	0.00344801	-0.0208835
TR6280_c0_g1	-0.00799319	-0.0195964
TR9145_c1_g1	0.000107185	-0.0211487
TR1309_c1_g1	-0.00909659	-0.01909
TR898_c2_g1	-0.00113418	-0.0211132
TR3245_c0_g1	0.00930407	-0.0189851
TR41393_c0_g1	0.00123013	-0.0211047
TR11160_c0_g1	-0.00605435	-0.0202544
TR33559_c0_g1	0.000502385	-0.0211229
TR2195_c2_g2	-0.00257189	-0.0209701
TR14754_c0_g1	-0.00250029	-0.0209772
TR2364_c2_g1	-0.00754901	0.0197297
TR14248_c0_g1	0.00588134	0.0202885
TR3417_c5_g1	-0.00673697	-0.0200166
TR9785_c0_g1	-0.00532433	0.0204229
TR6949_c0_g1	-0.00678367	-0.0199853
TR7033_c4_g1	0.00354735	-0.0208041
TR17419_c0_g1	0.000688337	-0.0210901
TR18217_c0_g1	-0.000679863	-0.0210903
TR344_c12_g1	0.0052993	0.0204234
TR5813_c0_g2	0.00703233	-0.019892
TR14431_c0_g1	0.00582907	-0.0202746
TR315_c6_g1	-0.00107411	-0.0210676
TR25717_c0_g1	0.00620849	-0.0201577
TR2691_c0_g1	-0.0102584	0.0184266
TR182_c2_g1	-0.00878561	-0.019168
TR40830_c0_g1	-0.00818954	-0.0194275
TR3169_c0_g1	0.0113124	-0.0177828
TR5104_c0_g2	-0.00837941	-0.0193348
TR43737_c0_g1	-0.00230451	-0.0209458
TR28060_c0_g1	-0.00504336	-0.0204591
TR31936_c0_g1	-0.00630302	-0.0201033
TR9934_c0_g2	-0.00795297	-0.0194983
TR18567_c0_g2	-0.00434066	-0.0206043
TR200_c2_g1	-0.00880535	0.0191265
TR7216_c0_g1	-0.000284183	-0.0210533
TR9481_c0_g1	0.00437726	0.0205934
TR76832_c0_g1	0.000464185	-0.0210464
TR22211_c0_g1	-0.00193385	-0.0209614
TR14295_c0_g1	-0.00483297	-0.0204863
TR19166_c0_g1	0.00131138	-0.0210058
TR11980_c0_g1	-0.00946687	0.0187959
TR9350_c0_g2	0.00592651	-0.0201861
TR71055_c0_g1	0.00332242	-0.0207736
TR3120_c0_g1	-0.00087949	-0.0210157
TR3070_c1_g1	0.000213084	-0.0210327
TR3448_c1_g1	-0.00349135	0.0207417
TR1839_c3_g2	0.0088242	0.0190891
TR8052_c3_g1	0.00581335	-0.0202058
TR8257_c0_g1	0.000888207	-0.0210059
TR27056_c0_g2	-0.0032188	-0.0207725
TR9430_c0_g1	0.00599393	-0.0201457
TR2478_c2_g1	-0.00285084	-0.0208229
TR32483_c0_g1	0.00198778	-0.0209214
TR9514_c0_g3	-0.00149407	-0.0209574
TR6954_c0_g1	0.00465155	-0.0204858
TR4982_c0_g1	-0.00365198	-0.0206867
TR24171_c0_g1	0.00476458	-0.0204589
TR53043_c0_g1	-0.00976337	-0.0185992
TR1580_c5_g1	-0.0101936	-0.0183651
TR98057_c0_g1	-0.00113713	-0.0209591
TR43564_c0_g2	0.00630819	-0.0200177
TR100842_c0_g1	0.0101028	-0.0183943
TR270_c1_g1	-0.00834974	-0.0192433
TR13932_c0_g4	0.000945632	-0.0209521
TR6296_c0_g1	-0.0092914	-0.0188024
TR3476_c0_g1	0.00742055	0.0196139
TR9629_c1_g1	0.000568884	-0.0209614
TR5168_c0_g1	-0.00257296	-0.0208036
TR9353_c0_g1	-0.0110783	0.0177927
TR2584_c3_g1	0.00634895	0.019965
TR88328_c0_g1	0.00460303	-0.0204307
TR1136_c4_g1	0.00323987	-0.0206843
TR20502_c0_g1	-0.011898	0.017226
TR5032_c0_g1	0.00217792	-0.0208217
TR1619_c1_g1	-0.00927237	-0.0187672
TR4443_c0_g1	-0.0104585	-0.0181234
TR2211_c1_g1	0.00136074	-0.0208802
TR33260_c1_g1	-0.00942283	-0.0186801
TR22171_c0_g1	-0.0118202	0.0172622
TR56_c1_g1	0.00553237	-0.020172
TR982_c1_g1	0.00597407	-0.0200439
TR6275_c0_g1	-0.00999823	-0.0183656
TR11704_c0_g1	0.00640212	-0.0199048
TR834_c4_g1	4.10152e-05	0.0209087
TR2535_c1_g1	-0.00883329	0.0189504
TR10873_c0_g3	-0.00935834	-0.0186904
TR9020_c0_g1	-0.00511874	-0.0202444
TR13373_c0_g1	-0.00987908	-0.0183961
TR28849_c0_g1	-0.00636437	-0.0198828
TR246_c2_g1	0.0083938	-0.0191088
TR726_c0_g2	-0.0042241	-0.0204261
TR20518_c0_g1	0.00306384	-0.0206292
TR23914_c0_g1	-0.00977585	0.0184142
TR46164_c0_g1	-0.0072574	-0.0195426
TR2078_c1_g1	-0.00329361	-0.020584
TR10267_c0_g1	-0.0100209	0.0182669
TR1095_c0_g3	0.00279606	-0.0206445
TR6791_c0_g2	0.00602916	0.0199401
TR22290_c0_g1	-0.00400558	-0.0204427
TR22531_c0_g1	-0.00629484	-0.0198565
TR31918_c1_g1	-0.000363137	-0.0208221
TR108_c2_g1	-0.00709348	-0.0195796
TR3015_c0_g1	-0.0102213	-0.0181312
TR65966_c0_g1	-0.00303911	-0.020588
TR11334_c0_g1	-0.00985654	-0.0183244
TR3889_c0_g1	-0.000410637	0.0208028
TR3940_c0_g2	-0.00992487	-0.0182778
TR10898_c0_g1	0.00272321	0.0206133
TR17455_c0_g1	-0.00391104	-0.0204156
TR8100_c0_g1	-0.0086214	-0.018914
TR7540_c0_g1	0.00662904	-0.0197002
TR2910_c0_g1	-0.00524837	-0.0201109
TR72316_c0_g1	0.00573188	0.0199746
TR1128_c0_g1	-0.00843079	-0.018988
TR1034_c1_g2	0.00267524	-0.0205996
TR38633_c0_g1	-0.00250854	-0.0206171
TR34820_c0_g1	0.00697291	-0.0195625
TR40102_c1_g1	0.0044537	-0.020283
TR26105_c0_g1	8.6279e-06	-0.0207659
TR5937_c0_g1	-0.0031983	0.0205153
TR10456_c1_g1	-0.000308296	-0.0207588
TR11713_c0_g1	0.00759863	-0.0193164
TR6572_c0_g1	-0.0104912	-0.0179011
TR73590_c0_g1	-0.010346	-0.0179775
TR6432_c0_g3	0.00469779	-0.0202016
TR364_c1_g2	-0.000839963	-0.0207182
TR1542_c3_g1	0.00999917	0.0181599
TR477_c1_g1	-0.00749174	-0.0193259
TR12956_c0_g1	-0.00983406	-0.0182437
TR9470_c0_g1	-0.00716424	0.0194401
TR9547_c0_g1	-0.00243236	-0.0205733
TR3243_c0_g1	0.00747665	-0.0193128
TR21596_c0_g1	-0.00366606	-0.0203818
TR1432_c1_g1	-0.00723142	0.0194038
TR57268_c0_g1	0.00262738	-0.0205362
TR16523_c1_g3	-0.00533093	0.0199998
TR16523_c1_g4	-0.00533093	0.0199998
TR6878_c0_g5	0.00582499	-0.0198608
TR640_c6_g1	-0.00852986	-0.0188484
TR417_c5_g1	-0.0119057	0.0169184
TR28176_c0_g2	0.00355773	-0.0203723
TR1413_c0_g3	-0.0106704	-0.0177105
TR3947_c0_g2	-0.00622833	-0.0197142
TR19563_c1_g1	-0.00488305	-0.020085
TR3871_c0_g1	-0.00370325	-0.0203346
TR14632_c2_g1	0.00950493	-0.0183539
TR13004_c0_g2	0.00584499	-0.0198176
TR1033_c0_g1	-0.00977079	-0.0181851
TR9815_c0_g1	-0.000611005	-0.0206229
TR6991_c0_g1	-0.00935099	-0.0183767
TR88063_c0_g3	-0.0091875	0.0184524
TR15334_c0_g1	-0.0050016	-0.0199936
TR25406_c1_g2	0.00657613	-0.0195323
TR16443_c0_g2	0.00611383	-0.0196813
TR78412_c0_g1	-0.00955429	-0.0182537
TR15680_c0_g1	-0.0101461	-0.0179309
TR53069_c0_g1	0.00503436	-0.0199747
TR19601_c0_g1	-0.00828609	-0.0188584
TR1932_c2_g1	-0.00492707	-0.0199952
TR8111_c0_g1	-0.00851582	-0.0187483
TR8023_c0_g1	0.00577317	-0.0197637
TR56449_c0_g1	0.000358335	-0.0205849
TR502_c10_g1	-0.0101527	-0.0179025
TR2078_c0_g1	0.00905501	-0.0184561
TR14757_c0_g1	0.0120402	-0.0166589
TR20471_c0_g1	0.00478341	0.0199895
TR25083_c0_g1	0.00668642	-0.0194342
TR617_c1_g1	-0.0109393	-0.0173975
TR416_c2_g1	-0.00887805	-0.0185308
TR16523_c0_g2	-0.00952378	-0.0181989
TR26207_c1_g1	0.00733603	0.0191846
TR28081_c0_g1	-0.00799324	-0.0189195
TR1418_c0_g2	0.0104503	-0.0176789
TR16293_c0_g1	-0.0081897	-0.0188296
TR75459_c0_g1	-0.00587659	-0.0196692
TR32349_c1_g1	0.00426275	-0.0200773
TR4734_c0_g2	-0.00169812	0.0204524
TR34384_c0_g1	-0.0103887	-0.0176975
TR24653_c0_g1	0.00510124	-0.0198736
TR14594_c0_g1	-0.00710954	-0.0192446
TR10101_c0_g1	-0.00379654	-0.0201604
TR6806_c4_g1	-0.000496219	-0.0205041
TR7906_c0_g1	0.00382018	-0.0201431
TR9720_c0_g1	1.50634e-05	-0.0205017
TR31786_c0_g1	0.0074714	-0.0190916
TR36136_c0_g1	0.0103563	0.0176907
TR20999_c0_g1	-0.00678995	-0.0193416
TR322_c0_g1	-0.0109346	-0.0173388
TR58822_c0_g1	-0.0026299	-0.0203261
TR15755_c0_g2	-0.0111255	-0.0172124
TR15575_c0_g1	0.00429865	-0.0200353
TR4426_c0_g1	-0.0063902	-0.019468
TR3645_c1_g1	0.0121755	-0.0164761
TR2621_c0_g2	0.00872687	-0.0185284
TR2135_c1_g1	-0.0099227	-0.0179087
TR8917_c0_g1	0.010024	-0.0178439
TR1351_c3_g1	-0.00342295	-0.0201773
TR13652_c0_g1	0.00754826	-0.0190216
TR17791_c0_g2	-0.00975191	-0.0179882
TR36285_c0_g1	-0.00528783	-0.0197622
TR37464_c0_g1	0.00786541	0.0188832
TR1978_c0_g1	-0.00253286	-0.0202953
TR11342_c0_g2	-0.0090276	-0.0183483
TR7204_c1_g1	-0.00122357	-0.0204045
TR22201_c0_g1	0.00358662	-0.0201196
TR1875_c3_g1	-0.0105969	-0.0174738
TR5925_c0_g1	-0.0095263	-0.0180765
TR22071_c0_g1	-0.00449014	-0.0199316
TR23_c2_g1	-0.00418704	-0.019997
TR4955_c0_g1	0.00682594	-0.019256
TR4317_c0_g1	0.0125162	-0.0161374
TR39177_c0_g1	0.00794421	0.0188085
TR14342_c1_g1	-0.00477691	-0.0198434
TR2173_c0_g1	-0.00807365	-0.0187382
TR70056_c0_g1	0.00101278	-0.0203783
TR194_c1_g1	-0.00950843	-0.0180516
TR73836_c0_g1	0.00303092	-0.0201694
TR52212_c0_g1	0.00523433	-0.0197108
TR129686_c0_g1	-0.00725335	-0.0190474
TR7617_c0_g1	0.00932169	0.0181179
TR2561_c0_g1	-0.0108004	-0.0172762
TR1510_c1_g1	0.00517054	-0.0197063
TR8000_c3_g2	0.00396529	-0.0199826
TR72373_c0_g1	0.00483192	-0.0197888
TR69387_c0_g1	0.00221219	-0.0202478
TR4077_c2_g1	-0.0114268	-0.0168586
TR1376_c0_g2	0.0105677	-0.0173848
TR4985_c1_g1	-0.00385611	0.0199755
TR10173_c0_g1	0.0114494	0.0168077
TR4657_c0_g1	0.00976548	-0.0178353
TR46031_c0_g1	0.00155214	-0.0202727
TR11739_c3_g1	-0.00653332	-0.0192491
TR1741_c0_g1	-0.0123776	0.0161154
TR14447_c1_g1	0.00525889	-0.0196218
TR71352_c0_g1	-0.0118557	0.0164828
TR13369_c0_g1	-0.00947715	-0.0179496
TR11309_c0_g1	0.00832608	-0.0185068
TR22591_c0_g1	0.00510643	-0.0196387
TR52970_c0_g1	0.00927768	-0.0180405
TR12344_c0_g1	0.00890009	-0.0182217
TR416_c1_g1	-0.00745837	0.0188523
TR93621_c1_g1	-0.00482164	0.0196918
TR3453_c0_g3	0.00906254	-0.0181321
TR8757_c0_g1	0.000472201	-0.0202588
TR2245_c3_g1	-0.000271218	-0.0202624
TR28564_c0_g1	-0.00499378	-0.0196281
TR16657_c0_g2	-0.00963076	-0.0178114
TR5183_c1_g1	0.00132942	0.0202046
TR118_c1_g1	-0.0112104	-0.016861
TR16497_c0_g1	0.00109069	-0.0202178
TR1876_c1_g1	0.00611263	-0.0193023
TR17000_c0_g1	0.00198849	-0.0201489
TR2040_c1_g1	-0.00421102	-0.0197985
TR93105_c0_g1	-0.0118392	0.0164172
TR28378_c0_g1	-0.00876672	-0.0182407
TR17174_c0_g1	0.00896416	0.0181395
TR6028_c0_g1	-0.0112866	0.0167932
TR1376_c0_g5	-0.0106841	-0.0171815
TR4036_c1_g1	-0.00937883	-0.0179226
TR7904_c0_g1	-0.00732182	-0.0188559
TR70673_c0_g1	0.00272633	-0.0200405
TR105570_c0_g1	0.00704713	-0.0189555
TR2823_c0_g3	0.00675547	-0.0190609
TR11850_c0_g1	-0.00259237	0.020041
TR8684_c0_g1	-0.00138897	0.0201589
TR123308_c2_g1	0.00660876	-0.0190821
TR10_c1_g1	-0.00534174	-0.0194729
TR37586_c1_g1	0.0049347	-0.0195752
TR34124_c0_g1	0.00314127	0.0199387
TR24584_c0_g2	-0.00249075	0.0200299
TR9328_c0_g1	-0.0117439	-0.016415
TR9308_c0_g1	0.00722734	0.0188442
TR12123_c0_g1	-0.0102112	-0.0174088
TR875_c6_g1	0.00647747	-0.0191114
TR7748_c1_g1	-0.00324039	-0.019914
TR3929_c1_g1	-0.0101121	-0.0174534
TR1255_c0_g1	-0.011741	-0.016399
TR649_c1_g1	-0.0122041	0.0160567
TR18338_c0_g1	-0.012033	0.0161842
TR2436_c1_g1	0.00876165	-0.0181585
TR960_c0_g1	-0.00736415	-0.0187663
TR1986_c2_g1	0.001105	-0.020129
TR10406_c0_g1	0.00790943	-0.0185342
TR6600_c0_g2	-0.000437505	-0.0201461
TR5194_c0_g1	-0.011167	-0.0167726
TR25143_c0_g1	-0.00958294	-0.0177229
TR4870_c0_g2	0.0014154	-0.020098
TR40911_c0_g1	0.00628485	-0.0191387
TR5807_c0_g1	-0.000281897	-0.020133
TR60611_c1_g1	-0.000387321	-0.0201252
TR7510_c0_g1	-0.011898	-0.0162317
TR9959_c0_g1	-0.0112439	0.0166876
TR10858_c0_g1	0.0066053	0.0190049
TR125028_c1_g1	0.00688907	-0.0189031
TR8733_c2_g2	-0.00029547	-0.020116
TR41425_c0_g2	0.0088498	-0.018055
TR28539_c0_g1	-0.00953387	-0.0176995
TR339_c3_g1	-0.0100032	-0.0174337
TR54746_c0_g1	-0.0068959	-0.0188783
TR9176_c0_g1	0.00124185	-0.0200591
TR609_c2_g1	-0.00671806	0.0189307
TR9364_c0_g1	0.010356	-0.0172096
TR13981_c0_g1	-0.00162203	-0.0200141
TR65883_c0_g1	-0.00191335	-0.0199879
TR55290_c0_g1	0.00673354	-0.0189116
TR12842_c0_g1	-0.00265767	-0.0198958
TR11783_c0_g1	0.00638929	-0.0190282
TR72192_c0_g2	-0.00161841	0.0200017
TR7139_c0_g1	-0.000376832	-0.0200563
TR6725_c0_g1	-0.0111095	-0.016701
TR1036_c0_g1	-0.0117855	-0.0162256
TR4405_c0_g2	0.00626978	-0.0190433
TR40544_c0_g1	0.000509052	-0.0200405
TR70899_c0_g1	0.0102565	-0.0172227
TR8419_c3_g1	-0.0127278	0.0154832
TR1470_c1_g1	-0.00313086	0.0197961
TR3128_c1_g1	-0.0122251	-0.0158809
TR6577_c0_g1	-0.00217821	-0.019921
TR4406_c0_g1	0.0106151	0.0169961
TR163229_c0_g1	0.00237437	-0.0198961
TR21165_c0_g1	0.00788273	-0.018413
TR23494_c0_g1	-0.00474222	-0.0194564
TR1182_c2_g1	-0.0118723	-0.0161196
TR34889_c0_g1	0.00176587	-0.0199348
TR4476_c0_g1	0.00386278	-0.019633
TR10123_c0_g1	0.011733	-0.0162067
TR10198_c0_g2	-4.39531e-05	-0.0199981
TR13413_c0_g1	0.00982578	-0.0174097
TR34370_c0_g1	0.00162501	-0.0199225
TR1468_c8_g1	0.00567909	-0.0191638
TR14424_c0_g1	0.008252	0.0182029
TR30068_c0_g1	-0.013097	0.015083
TR10411_c0_g1	-0.00266788	-0.0197951
TR46001_c0_g1	-0.00329731	-0.0196994
TR91769_c0_g1	-0.000731601	-0.0199492
TR52825_c0_g1	-0.0104127	-0.0170096
TR6854_c4_g1	0.00395221	-0.0195468
TR7970_c0_g3	-0.011554	-0.0162524
TR10148_c0_g1	-0.0109373	-0.0166689
TR38635_c0_g1	-0.000576685	-0.0199214
TR2514_c2_g1	-0.00777278	-0.0183469
TR8241_c0_g1	-0.0114745	-0.0162783
TR37813_c0_g1	-0.00884708	-0.0178363
TR32392_c1_g1	0.00471615	-0.0193415
TR2415_c0_g2	0.00262783	0.0197333
TR442_c2_g1	0.0118534	0.0159911
TR16611_c0_g1	-0.00827189	-0.0181047
TR7738_c0_g1	0.00709742	-0.0185771
TR8438_c0_g1	-0.0117924	-0.0160116
TR12574_c0_g1	-0.00083366	-0.0198674
TR9235_c1_g1	-0.00145993	-0.0198271
TR14263_c0_g1	0.00895143	0.0177501
TR3880_c0_g1	-0.0121205	-0.0157506
TR18452_c0_g2	0.0111104	-0.0164781
TR9780_c0_g1	-0.0108984	0.0166125
TR4872_c0_g1	-0.00822795	-0.0180815
TR11263_c0_g1	-0.0103832	0.0169293
TR1701_c0_g1	0.0124478	0.0154723
TR9524_c0_g1	-0.0137403	0.0143366
TR4409_c0_g1	-0.0109616	0.0165578
TR28856_c0_g1	0.00590524	-0.0189533
TR64732_c0_g1	-0.00598925	-0.018923
TR48354_c0_g2	-0.00762287	-0.0183249
TR496_c2_g1	0.00784023	-0.0182299
TR41919_c0_g1	-0.00197174	-0.0197444
TR37714_c0_g1	0.00115875	-0.019807
TR3810_c0_g1	-0.0100691	-0.0170906
TR5410_c0_g1	-0.00674753	-0.0186498
TR1060_c0_g2	0.00844088	0.0179439
TR18043_c0_g1	0.00921287	-0.0175596
TR753_c0_g2	-0.00918068	-0.017576
TR23924_c2_g1	-0.000275531	-0.019818
TR34788_c0_g1	0.00277864	-0.0196218
TR47660_c1_g1	-0.00951532	-0.0173774
TR5396_c0_g1	-0.00892558	-0.0176851
TR69170_c0_g1	-0.00573704	-0.0189576
TR43794_c0_g3	-0.00815776	-0.0180458
TR1859_c0_g1	0.0117867	0.0159145
TR19883_c0_g3	-0.0021493	-0.0196811
TR46269_c0_g1	0.00765341	0.018256
TR22339_c0_g1	0.0105379	-0.016757
TR2116_c0_g2	-0.0118987	-0.0158144
TR18073_c1_g3	0.0105479	-0.0167449
TR1685_c0_g1	-0.00622073	-0.0187823
TR38_c1_g1	-0.0124906	-0.0153403
TR7027_c2_g1	0.00184538	-0.0196854
TR876_c1_g1	-0.0108222	-0.0165324
TR1188_c4_g1	-0.0110187	-0.0163864
TR12468_c0_g1	-0.0120469	-0.0156459
TR23500_c0_g1	-0.000176032	-0.0197437
TR18986_c0_g1	-0.0098003	0.0171369
TR10198_c0_g1	-0.00512004	-0.0190646
TR4855_c1_g1	0.0106767	0.0166035
TR195369_c0_g1	-0.00664532	0.0185863
TR1413_c3_g1	-0.0125302	-0.0152492
TR29685_c1_g1	-0.011396	-0.0161117
TR5153_c0_g1	0.0114837	0.0160334
TR6334_c2_g1	-0.00229432	-0.0195875
TR56518_c0_g1	-0.013664	0.0142207
TR15690_c0_g1	-0.0121629	-0.0155194
TR40785_c0_g1	0.00840162	0.0178357
TR1931_c0_g1	0.0131051	-0.0147287
TR36903_c2_g1	-0.0121778	0.0155006
TR5984_c0_g1	0.0120504	0.0155871
TR128903_c0_g1	-0.0135823	0.014268
TR18282_c0_g2	-0.00185329	-0.0196064
TR1573_c0_g1	0.0125589	-0.0151688
TR2781_c0_g2	-0.0120132	-0.0155931
TR1935_c0_g1	0.00115628	-0.0196447
TR1929_c0_g1	0.0127976	-0.0149461
TR20922_c0_g1	0.00578278	-0.0188063
TR10264_c1_g1	0.0042052	-0.019213
TR3468_c0_g1	-0.00513888	0.0189835
TR908_c9_g2	-0.00777267	-0.0180631
TR7569_c0_g1	0.00784459	-0.0180309
TR31913_c0_g1	0.0111207	0.0162112
TR10800_c0_g2	-0.00219518	0.0195346
TR14625_c0_g1	-0.00101201	-0.0196263
TR3408_c0_g1	0.00121593	-0.0196124
TR14265_c0_g1	-0.0101524	-0.0168157
TR18519_c0_g1	-0.0128378	-0.0148626
TR16274_c0_g2	-0.00363391	-0.0192964
TR2007_c0_g2	-0.00517097	-0.0189258
TR2636_c3_g1	-0.0079545	0.0179324
TR9712_c0_g1	0.0106034	-0.0165028
TR51147_c0_g1	0.000860369	-0.0195933
TR20701_c0_g4	0.00179393	-0.0195288
TR6977_c0_g1	0.0124039	0.0151864
TR7297_c0_g1	-0.0114587	-0.0159114
TR33390_c1_g1	0.0013179	-0.0195633
TR14586_c1_g1	0.0130605	0.0146205
TR4079_c0_g1	0.0103067	-0.0166731
TR1311_c0_g1	-0.0125291	-0.0150739
TR503_c4_g1	-0.00392623	-0.0192026
TR5392_c1_g1	-0.00868059	-0.0175697
TR13736_c0_g1	-0.0127925	0.0148372
TR1278_c1_g1	-0.0128877	-0.0147505
TR15048_c1_g1	-0.0127278	-0.0148855
TR2632_c1_g2	-0.00746226	0.0181069
TR11879_c0_g1	-0.00929709	-0.0172313
TR3519_c2_g1	-0.0131972	0.0144621
TR4299_c2_g2	0.0110021	0.0161943
TR13550_c0_g1	0.0109669	0.0162169
TR17139_c2_g1	0.00501994	-0.0189124
TR5156_c0_g1	-0.00498334	0.0189204
TR19669_c0_g2	-0.00468669	-0.0189958
TR8876_c0_g1	0.00942379	0.0171445
TR4389_c0_g1	-0.0130186	-0.0146011
TR12486_c0_g1	-0.0142511	0.0133933
TR477_c2_g1	0.0106573	-0.0163977
TR2634_c3_g1	0.0117558	0.015626
TR1412_c1_g2	0.00803095	-0.017827
TR1092_c2_g1	0.0129303	0.0146633
TR47510_c0_g1	-0.0120331	0.0154071
TR12743_c0_g1	-0.0109922	-0.0161604
TR5711_c0_g1	-0.011888	0.0155115
TR83809_c1_g1	-0.00234025	-0.0194025
TR4426_c5_g1	-0.00703271	-0.0182319
TR5238_c0_g1	0.00188362	-0.0194494
TR7708_c0_g2	-0.0124412	0.0150659
TR9869_c0_g1	0.00764941	-0.0179787
TR2716_c3_g2	0.012106	0.0153318
TR1182_c0_g2	-0.0120611	-0.0153659
TR5251_c0_g1	0.00406415	-0.0191044
TR113_c10_g1	-0.00995926	-0.0168
TR3395_c2_g2	0.00379353	-0.0191576
TR8278_c0_g2	-0.0122652	-0.0151928
TR24249_c0_g1	-0.00838681	-0.0176325
TR20614_c0_g1	0.00083116	0.0195046
TR74079_c0_g1	-0.00842976	-0.0176084
TR48762_c0_g1	0.0106651	0.0163493
TR21291_c0_g1	-0.0119245	0.0154472
TR982_c0_g1	-0.0125068	-0.0149709
TR9961_c2_g1	-0.0124437	-0.0150193
TR8774_c1_g1	-0.00827082	0.0176602
TR31564_c0_g1	-0.00351826	-0.0191751
TR1978_c1_g1	-0.0127536	0.0147345
TR45993_c0_g1	-0.0130323	-0.0144843
TR9982_c0_g2	-0.0115283	-0.0157043
TR29784_c0_g1	-0.0131829	0.0143291
TR1022_c0_g3	0.00660956	-0.0183135
TR55_c3_g1	0.0123173	0.0150757
TR11221_c0_g1	-0.0144181	0.0130808
TR3479_c0_g4	-0.0128349	-0.0146336
TR1010_c0_g3	0.00188048	-0.0193729
TR13011_c0_g1	-0.00702245	-0.0181506
TR9765_c0_g1	-0.0117331	-0.0155261
TR31363_c0_g1	-0.00213827	-0.0193426
TR24018_c1_g1	-0.0101413	0.0165986
TR618_c0_g1	-0.00468692	-0.018876
TR50939_c0_g1	-0.0105272	0.0163521
TR1477_c3_g1	0.00690347	0.0181811
TR6508_c0_g2	0.0121678	0.015164
TR19054_c0_g1	0.00825128	-0.0176027
TR14935_c0_g1	-0.00873181	0.0173675
TR3018_c10_g1	6.2008e-05	0.0194385
TR8480_c0_g1	-0.012378	-0.0149847
TR33576_c0_g1	-0.000812553	0.0194129
TR4951_c0_g1	0.0125632	0.0148215
TR3886_c1_g4	-0.0125181	0.0148578
TR7191_c0_g1	0.00153685	-0.0193652
TR11836_c0_g1	-0.0119293	-0.0153288
TR33281_c0_g1	-0.0072711	-0.0180096
TR2463_c0_g1	0.0100706	0.0166048
TR9513_c0_g1	-0.0118506	0.0153823
TR47342_c0_g1	-0.00787664	0.0177409
TR833_c0_g3	-0.0121358	-0.0151485
TR6971_c0_g1	-0.00973099	0.0167882
TR118271_c0_g1	-0.00959528	0.0168551
TR4969_c2_g1	-0.00274017	-0.0191989
TR8152_c0_g1	-0.0101937	-0.0164935
TR1967_c0_g1	-0.0098683	-0.0166901
TR5429_c0_g1	0.0056349	-0.0185499
TR645_c0_g2	-0.0134798	0.0139329
TR24143_c0_g1	-0.0116392	0.0154949
TR56150_c2_g1	0.00841369	0.0174568
TR7359_c0_g1	-0.0130113	0.0143568
TR11159_c0_g1	0.0102229	0.0164585
TR1973_c0_g1	-0.010185	-0.0164763
TR57939_c0_g1	-0.00700921	0.0180538
TR2140_c0_g2	-0.0137449	0.0136425
TR3134_c0_g1	-0.0136351	0.0137507
TR56944_c0_g1	0.00391296	-0.0189608
TR16131_c0_g1	-0.0141047	0.0132613
TR1091_c1_g1	-0.0109468	-0.0159647
TR5799_c1_g1	-0.0134304	0.01394
TR4034_c0_g1	-0.00941535	-0.016913
TR10971_c0_g1	-0.0128502	-0.0144699
TR14145_c0_g1	-0.0114326	0.0156053
TR14226_c0_g1	-0.0107008	-0.0161124
TR5013_c0_g1	-0.011565	-0.0155035
TR18265_c0_g1	-0.0129346	0.0143806
TR1922_c0_g1	-0.0132853	0.0140549
TR12803_c0_g1	-0.00852266	-0.0173577
TR240_c1_g1	0.0128402	0.0144574
TR9582_c0_g1	-0.0110732	-0.0158499
TR11344_c0_g1	0.00900542	-0.0171047
TR23440_c0_g1	-0.0122357	0.0149632
TR7694_c0_g1	-0.014527	0.0127492
TR7489_c0_g1	-0.0123833	-0.0148361
TR2361_c1_g1	-0.00581921	0.0184275
TR47790_c0_g1	0.00286229	-0.0191108
TR7763_c0_g1	-0.000769274	-0.0193055
TR1111_c2_g1	-0.0127229	-0.0145388
TR21250_c0_g1	-0.014381	0.0128998
TR6579_c0_g1	-0.0142745	0.0130139
TR40767_c0_g1	-0.00149934	0.019258
TR6096_c1_g1	-0.0131758	-0.0141247
TR13039_c1_g1	0.00342356	-0.01901
TR63720_c0_g1	-0.0136247	0.0136886
TR7128_c0_g1	-0.000804759	-0.0192963
TR65313_c3_g1	0.00105926	-0.0192824
TR2739_c1_g1	-0.0136008	-0.0137064
TR3039_c1_g1	-0.0127027	-0.0145389
TR23683_c0_g1	0.0092991	-0.0169191
TR21769_c0_g1	0.00646151	-0.0181907
TR1110_c1_g1	0.00309559	-0.0190509
TR1599_c3_g1	-0.00424087	0.0188276
TR3730_c1_g1	-0.010247	-0.0163506
TR4056_c1_g1	-0.0130255	-0.014236
TR30754_c1_g1	0.00233121	-0.0191529
TR2938_c1_g2	-0.0118289	-0.015237
TR4247_c0_g1	0.0131378	-0.0141198
TR8912_c0_g2	-0.00487094	0.0186607
TR7908_c1_g1	0.0134891	0.0137677
TR24188_c0_g1	0.0018807	-0.0191783
TR54076_c0_g1	-0.0148802	0.0122426
TR578_c1_g2	-0.00578163	0.0183809
TR6909_c0_g1	0.0136691	0.0135707
TR3069_c0_g2	-0.0091383	-0.0169545
TR15133_c0_g1	-0.0100835	-0.0164084
TR739_c0_g2	-0.0117585	0.0152511
TR32227_c0_g1	-0.0135208	-0.0137116
TR51115_c0_g1	0.0100159	0.0164424
TR1256_c0_g1	-0.0134949	-0.0137294
TR1398_c2_g1	-0.013097	-0.014107
TR97_c1_g1	0.0113945	-0.0155138
TR8631_c1_g1	0.00790638	-0.0175488
TR2283_c1_g1	-0.0134259	-0.0137911
TR2538_c0_g1	0.00722987	0.0178323
TR4804_c2_g1	-0.00212974	0.0191222
TR68350_c0_g1	-0.013079	0.0141109
TR13454_c0_g1	-0.0143704	0.0127917
TR29671_c1_g2	0.000185676	-0.0192369
TR3945_c0_g1	-0.0125277	0.0145977
TR223_c1_g1	-0.0119595	0.0150666
TR13513_c0_g1	-0.0111733	0.0156582
TR7156_c0_g1	0.00666368	0.0180412
TR52337_c0_g2	-0.0123681	0.0147199
TR62350_c0_g1	0.0035307	-0.0188983
TR33621_c0_g1	0.0141901	-0.0129702
TR1865_c0_g1	-0.0118891	-0.0151067
TR18235_c0_g1	-0.00993479	0.0164523
TR16876_c0_g1	-0.0150848	0.0118984
TR4214_c0_g1	-0.012619	-0.0144763
TR5209_c2_g1	0.00998005	-0.0164005
TR3264_c1_g1	-0.0141203	0.0130011
TR17106_c0_g1	-0.00172106	-0.0191145
TR34249_c0_g1	0.00948418	-0.0166836
TR6345_c0_g1	0.0129284	0.0141802
TR1957_c4_g3	0.0130845	-0.0140342
TR10637_c0_g2	0.0092612	-0.0168038
TR10398_c0_g1	0.0125577	0.014487
TR40923_c0_g1	-0.013514	0.0135914
TR13515_c0_g2	0.00678159	0.0179262
TR3094_c0_g1	-0.00875009	-0.0170458
TR2942_c0_g1	-0.0116439	-0.0152137
TR4289_c0_g1	-0.00636225	-0.0180681
TR21741_c0_g1	-0.014065	0.0130003
TR28964_c0_g1	-0.00656282	-0.0179908
TR28069_c0_g1	-0.0142959	0.0127358
TR11860_c1_g1	-0.00854307	-0.0171335
TR8519_c0_g4	-0.0137031	0.0133675
TR13880_c0_g1	0.000770062	0.0191266
TR7419_c0_g1	0.012318	0.0146418
TR654_c8_g2	0.0125534	-0.0144399
TR26448_c0_g1	0.0124984	0.0144812
TR120266_c0_g1	0.00997135	-0.0163239
TR113_c4_g3	-0.00435821	-0.0186183
TR44511_c0_g1	0.00495459	0.018468
TR19224_c0_g1	-0.0124844	0.0144807
TR8812_c1_g1	-0.0114813	0.0152879
TR64_c0_g1	-0.0107286	-0.0158204
TR1364_c1_g1	-0.0119062	0.0149535
TR47488_c0_g1	-0.0131521	-0.0138681
TR4298_c0_g1	0.0130532	0.0139597
TR719_c0_g1	-0.00509501	0.0184178
TR17676_c0_g1	-0.0113135	0.0153994
TR3532_c0_g1	0.00945194	-0.0166057
TR10228_c0_g1	-0.00652538	0.0179573
TR11303_c1_g1	-0.0144512	0.0124967
TR16049_c0_g1	0.00800941	-0.0173313
TR16419_c0_g2	-0.0119823	-0.0148641
TR74502_c0_g1	0.00996563	0.0162792
TR2144_c0_g1	0.0143472	-0.0125851
TR31843_c0_g1	-0.00942356	0.0165934
TR1742_c0_g1	-0.00991973	0.0162968
TR31790_c0_g1	-0.0114736	0.0152397
TR1074_c4_g1	-0.0025378	-0.0188991
TR9989_c0_g1	0.00286672	-0.0188515
TR8525_c0_g1	0.0129514	0.0139944
TR20_c2_g2	-0.0126819	-0.0142238
TR34472_c1_g1	0.0133029	-0.0136401
TR3895_c2_g1	-0.00335775	-0.0187509
TR43735_c0_g1	0.0124483	0.0144166
TR10097_c0_g1	0.00214438	-0.0189237
TR1988_c0_g1	0.00842996	-0.017076
TR6872_c0_g1	0.00308337	-0.018792
TR15509_c0_g2	0.00233386	-0.0188989
TR4500_c3_g1	-0.0146141	0.0122017
TR28818_c0_g1	-0.0138716	-0.0130392
TR4119_c0_g1	-0.0118343	-0.0149101
TR96289_c0_g1	0.00187084	-0.0189424
TR16875_c0_g1	-0.0058177	0.0181234
TR29802_c0_g1	0.00930807	-0.0166007
TR56960_c0_g2	-0.0153786	0.0112118
TR6685_c0_g1	0.0121629	0.0146366
TR553_c0_g2	-0.0142124	0.0126524
TR6629_c0_g1	-0.00924064	-0.0166329
TR55_c0_g1	-0.00878724	-0.0168768
TR2041_c1_g1	0.0137791	0.0131205
TR499_c0_g1	-0.012847	-0.0140329
TR21154_c0_g2	0.0131428	0.0137533
TR248_c1_g2	0.00808371	0.0172163
TR3674_c0_g2	-0.0141665	0.0126878
TR14401_c0_g1	-0.0117835	0.0149245
TR1978_c4_g1	0.0040768	-0.0185732
TR64729_c0_g1	-0.0130383	0.0138336
TR1014_c1_g3	-0.0147977	0.0119324
TR20453_c0_g1	0.00493088	-0.0183575
TR8679_c0_g1	-0.0139425	0.0129184
TR28650_c0_g1	-0.0116955	0.0149797
TR8911_c0_g1	-0.010236	0.0160118
TR4372_c0_g2	-0.00425456	-0.0185186
TR12268_c0_g1	0.005593	0.0181528
TR11190_c0_g1	0.0099829	0.0161587
TR16237_c0_g2	0.00521528	-0.0182585
TR1628_c1_g1	-0.00896731	0.016737
TR1939_c1_g1	-0.00996036	-0.0161563
TR26204_c0_g1	-0.0149876	0.0116372
TR26096_c1_g1	0.0127762	0.0140286
TR9665_c0_g1	-0.0147798	0.0118982
TR4953_c0_g1	0.0117967	-0.0148564
TR1912_c1_g1	-0.0120976	-0.0146093
TR97920_c0_g1	-0.00555802	-0.0181336
TR1100_c1_g1	0.0135219	0.0132973
TR20_c12_g1	-0.0147342	0.0119355
TR2723_c1_g1	-0.0139938	-0.0127945
TR3076_c0_g1	0.00851	-0.0169427
TR5607_c3_g1	-0.0118511	-0.0147963
TR4035_c2_g1	-0.0132662	-0.0135416
TR3817_c0_g1	-0.0136791	-0.0131195
TR23788_c0_g2	-0.0143544	0.0123659
TR1299_c2_g1	0.00924413	-0.0165351
TR78193_c1_g1	0.0140619	0.0126916
TR1735_c0_g1	-0.00273261	-0.0187421
TR6428_c0_g1	0.00736435	-0.0174469
TR19439_c0_g1	-0.0119113	-0.0147222
TR6088_c0_g2	0.00299125	0.0186916
TR27734_c0_g1	-0.0113363	0.0151454
TR4704_c0_g3	-0.0131242	-0.0136241
TR7323_c0_g1	-0.0127097	0.0140111
TR18058_c0_g1	0.0129925	0.0137434
TR24074_c0_g1	-0.0105672	-0.0156828
TR5642_c0_g1	-0.00838876	0.0169481
TR3647_c2_g1	0.00838857	-0.0169477
TR876_c3_g3	0.00918981	-0.0165216
TR3846_c1_g1	0.0141978	-0.012483
TR19251_c0_g1	-0.0119372	0.0146579
TR2331_c2_g1	-0.0127391	-0.0139636
TR3651_c3_g1	-0.0146186	0.0119802
TR1188_c0_g3	0.00776466	-0.0172301
TR27177_c0_g1	-0.0136265	-0.0130837
TR3581_c0_g1	-0.00267377	-0.0186998
TR1079_c0_g1	-0.014015	-0.012662
TR56960_c0_g1	-0.014995	0.0114811
TR3128_c0_g1	0.00772923	-0.0172274
TR9997_c0_g1	-0.00905398	-0.0165638
TR3991_c0_g1	-0.011897	0.0146499
TR145_c0_g1	0.0143847	-0.0122148
TR26741_c0_g1	0.0126737	0.0139791
TR3135_c0_g1	-0.0145296	0.0120374
TR58845_c0_g1	0.00858689	-0.0168007
TR5803_c0_g1	0.0137732	0.0128865
TR2714_c5_g2	0.000908883	0.0188372
TR9857_c0_g1	0.00985907	-0.0160699
TR3825_c0_g1	-0.0138741	-0.0127585
TR2406_c3_g1	0.0147594	-0.0117215
TR8923_c2_g1	0.00270783	-0.0186496
TR4186_c0_g1	0.0142135	0.0123685
TR1367_c0_g2	-0.00497316	-0.0181677
TR10080_c0_g1	-0.0131025	-0.0135319
TR38706_c0_g1	0.0126579	0.0139473
TR18429_c0_g1	-0.00551403	-0.0180085
TR31384_c0_g2	0.00279117	-0.0186257
TR12685_c0_g1	-0.0144503	0.0120717
TR1898_c0_g1	-0.0130953	-0.0135295
TR796_c1_g1	-0.0132051	-0.0134193
TR3901_c1_g1	0.0143043	0.0122399
TR7969_c0_g1	-0.0111	-0.0152056
TR244_c2_g1	-0.0124455	0.0141114
TR1555_c1_g1	-0.00968911	-0.0161288
TR5870_c0_g1	0.00558071	-0.0179661
TR122354_c0_g1	-0.0130741	-0.0135269
TR5459_c0_g1	0.0143715	0.0121393
TR4941_c0_g1	0.0124174	0.014131
TR179_c0_g1	0.0115182	0.0148699
TR40598_c0_g1	0.00490487	0.0181519
TR245_c0_g1	0.0133756	0.0132098
TR50464_c0_g1	0.013438	-0.0131452
TR3197_c0_g1	-0.014529	0.0119241
TR13167_c0_g1	-0.0135756	-0.0129982
TR14739_c0_g1	0.0121315	0.0143523
TR17923_c0_g1	0.0107552	-0.0154002
TR56288_c0_g1	0.00840981	-0.0167946
TR2062_c0_g1	-0.0131406	-0.0134158
TR66700_c0_g1	0.00921689	0.0163609
TR15922_c0_g1	-0.0130433	0.0135075
TR18688_c0_g1	0.0152288	0.0109798
TR13933_c0_g1	-0.0129293	-0.0136109
TR935_c0_g1	-0.0138148	-0.0127104
TR7584_c0_g1	0.00593611	-0.0178054
TR1455_c2_g1	-0.0143278	-0.0121153
TR11624_c0_g2	-0.0131863	0.0133482
TR7285_c0_g1	-0.0141247	-0.0123392
TR4110_c0_g1	-0.00600278	-0.0177683
TR5842_c0_g1	-0.0139169	-0.0125691
TR10534_c0_g1	0.0103693	-0.0156239
TR3537_c0_g1	-0.0146318	0.0117248
TR66335_c0_g1	0.00645652	-0.0176023
TR5969_c0_g1	0.00462431	-0.0181667
TR3306_c2_g1	-0.0131406	0.0133682
TR98252_c0_g1	-0.00656682	-0.0175549
TR8733_c2_g3	0.00252503	-0.0185694
TR33306_c0_g1	0.00933868	-0.016247
TR6587_c0_g1	-0.00771056	0.0170784
TR4212_c0_g1	-0.0135929	-0.0128931
TR5253_c2_g1	-0.0145343	0.0118198
TR48591_c0_g1	-0.0118995	0.0144689
TR17010_c0_g1	-0.0128249	-0.013653
TR8156_c0_g1	-0.00898805	-0.0164318
TR387_c0_g1	-0.00369656	0.0183565
TR97080_c0_g1	0.0123571	-0.0140632
TR17776_c0_g1	-0.0115566	0.0147262
TR1484_c0_g2	0.0148195	0.0114346
TR24348_c0_g1	-0.00340551	-0.0184052
TR6809_c0_g1	0.0142396	-0.0121474
TR3479_c0_g1	-0.0145594	-0.0117613
TR32078_c0_g1	0.00419278	-0.0182385
TR6089_c0_g1	0.0128095	0.0136429
TR19874_c0_g2	0.00355552	0.0183693
TR2864_c1_g1	-0.0147209	0.0115473
TR23851_c0_g1	-0.0142959	0.0120681
TR2245_c2_g2	0.00952538	0.016102
TR22273_c1_g1	-0.0121961	-0.0141851
TR53540_c0_g1	-0.0128814	-0.0135628
TR57568_c1_g1	0.0134063	0.0130432
TR7148_c0_g1	0.011261	0.0149321
TR1569_c2_g1	0.00641375	-0.0175669
TR8267_c0_g1	0.0131673	0.0132734
TR70_c0_g2	-0.0145564	0.0117302
TR37143_c0_g1	-0.00405997	-0.018248
TR2715_c0_g1	0.0130901	-0.0133451
TR6882_c0_g1	-0.0151016	0.011013
TR31039_c0_g1	-0.0152621	0.0107886
TR30092_c0_g1	-0.00569199	-0.017802
TR54929_c0_g2	-0.00277929	0.018475
TR24834_c0_g1	0.00819025	-0.0167899
TR6862_c0_g2	0.000671007	-0.0186683
TR557_c1_g1	0.0112519	-0.014911
TR162_c2_g1	0.0146264	0.0116181
TR9921_c0_g1	0.00557203	0.017828
TR20076_c2_g1	-0.0135782	-0.0128258
TR73319_c0_g1	-0.0125764	-0.0138019
TR11186_c0_g1	-0.00238139	0.018516
TR13131_c0_g1	-0.010354	0.0155334
TR26542_c0_g1	0.0127822	0.0136045
TR25082_c0_g1	0.0144026	0.0118703
TR5938_c0_g1	-0.0130023	0.0133849
TR8907_c0_g1	-0.0101272	-0.015673
TR5233_c0_g1	-0.0102692	-0.0155795
TR5663_c1_g1	-0.0151626	0.0108746
TR16213_c0_g1	-0.0125831	-0.0137746
TR753_c0_g1	-0.0098711	-0.0158303
TR10_c3_g1	0.0149509	0.0111543
TR454_c3_g1	0.0148026	0.0113473
TR1317_c3_g1	0.0145939	0.0116121
TR674_c3_g1	-0.0111522	-0.0149452
TR1353_c1_g1	-0.0146952	-0.0114783
TR6415_c0_g1	0.0137929	0.0125463
TR27082_c0_g3	0.00484138	-0.0180028
TR1451_c0_g2	0.0147715	-0.0113671
TR103396_c0_g1	0.000770383	-0.0186197
TR20854_c0_g1	-0.0135922	0.0127442
TR60786_c0_g1	-0.0159677	0.00959702
TR86050_c0_g1	-0.0153281	0.0105885
TR928_c9_g1	-0.0130873	-0.0132578
TR4881_c0_g2	0.0128168	0.0135146
TR1241_c1_g1	-0.0156148	0.0101417
TR6305_c4_g1	-0.0060037	-0.0176225
TR979_c3_g1	-0.0146362	0.0115056
TR127346_c0_g1	-0.0148975	0.0111633
TR7770_c0_g2	0.0136507	0.0126541
TR8925_c0_g1	0.0110324	0.0149916
TR1528_c3_g1	-0.0155161	0.010279
TR590_c2_g2	0.00755843	-0.0170057
TR73877_c1_g1	0.0111463	0.0148988
TR4153_c0_g1	0.0128622	0.0134429
TR33426_c0_g1	-0.0136596	0.0126311
TR16401_c0_g1	-0.0147858	-0.0112823
TR12712_c0_g2	0.00606109	0.0175807
TR57695_c0_g1	-0.0146863	0.0114026
TR5746_c0_g1	-0.015136	0.010798
TR12551_c0_g1	0.0129741	0.0133093
TR3835_c0_g1	-0.00756555	-0.0169725
TR7961_c0_g1	-0.000670725	-0.0185695
TR3838_c0_g3	-0.0127448	-0.0135198
TR10501_c0_g1	-0.0130866	0.013188
TR131_c0_g1	0.0115789	-0.0145253
TR63637_c0_g1	-0.015353	0.0104546
TR18397_c1_g1	-0.0156291	0.0100361
TR8223_c1_g1	0.0118352	0.0143138
TR2026_c5_g1	0.0148989	0.0110896
TR19778_c0_g1	0.00220612	-0.0184373
TR1400_c1_g1	0.0113855	0.014668
TR4963_c0_g1	0.0143227	-0.011813
TR89_c3_g1	-0.0109725	-0.0149642
TR10284_c0_g1	-0.00805868	0.0167118
TR40344_c0_g1	-0.0157435	0.00981588
TR94_c2_g1	-0.0102593	-0.0154573
TR9117_c0_g1	0.0111217	-0.0148486
TR5792_c0_g1	-0.0113505	-0.0146731
TR3059_c0_g1	-0.0140082	-0.0121599
TR15965_c0_g1	0.00436803	-0.0180278
TR2224_c2_g1	-0.00592681	0.0175758
TR48818_c0_g1	0.00593501	-0.0175695
TR4856_c0_g1	0.0147962	-0.011179
TR11809_c0_g1	0.0153812	-0.0103585
TR3922_c0_g1	-0.014352	-0.011743
TR17833_c0_g1	-0.0119047	-0.0142179
TR2833_c1_g1	0.00512235	-0.0178201
TR55964_c0_g1	-0.0102878	0.0154223
TR44861_c0_g1	-0.0159595	0.00943094
TR10277_c0_g1	0.0106406	-0.015177
TR34069_c0_g2	-0.0127139	0.0134852
TR770_c0_g1	-0.0123594	0.0138099
TR12766_c0_g1	-0.0119073	-0.0142014
TR42388_c0_g1	-0.0144224	0.0116377
TR207194_c0_g1	-0.0159117	0.00949304
TR1059_c0_g1	0.0152046	0.0105864
TR1940_c1_g2	-0.0151772	0.0106229
TR35472_c0_g1	0.0136195	0.0125543
TR2812_c0_g1	0.01505	0.0107974
TR23979_c2_g1	-0.000202432	-0.0185184
TR4642_c0_g1	-0.0136394	0.0125271
TR2589_c0_g2	0.0116372	-0.0144051
TR8478_c0_g1	-0.0156872	0.00982095
TR5872_c0_g3	-0.0126885	0.0134719
TR2026_c1_g1	-0.0144348	0.0115739
TR49790_c0_g1	-0.0149825	0.0108536
TR39087_c0_g1	0.0143166	0.0117152
TR20263_c0_g1	-0.00027968	-0.0184956
TR8370_c0_g1	0.00766362	-0.0168354
TR517_c1_g1	0.00496451	0.0178187
TR47493_c0_g1	-0.0152021	0.0105356
TR52480_c0_g1	0.000594603	-0.0184848
TR4638_c2_g1	0.0146913	0.0112317
TR18291_c0_g1	-0.0152268	0.0104937
TR26030_c0_g2	-0.0131574	0.0129921
TR25953_c0_g1	-0.00739177	0.0169475
TR20916_c0_g1	0.00158454	-0.0184207
TR4355_c0_g1	-0.00558721	-0.017618
TR17870_c0_g3	-0.0143449	0.0116537
TR50488_c0_g1	-0.0124619	0.0136483
TR2951_c9_g1	0.00072202	-0.0184659
TR12705_c0_g1	-0.0111452	-0.0147404
TR4166_c17_g1	0.0131202	0.013012
TR1114_c1_g3	0.0149708	-0.0108309
TR4162_c1_g1	-0.0125714	-0.013537
TR41148_c0_g1	-0.014647	0.0112535
TR24799_c0_g1	0.0140908	0.0119423
TR3562_c0_g1	-0.0141839	0.0118287
TR9135_c0_g1	-0.0121064	0.0139408
TR13799_c0_g1	-0.00548486	0.0176301
TR13934_c0_g1	-0.00971153	0.015703
TR1468_c9_g1	0.0152903	-0.0103461
TR27321_c1_g1	-0.0139334	-0.0121112
TR47979_c0_g1	-0.0146059	0.0112894
TR21997_c0_g1	-0.0135073	-0.0125807
TR6116_c0_g1	-0.0100179	0.0155036
TR11120_c0_g1	0.00969075	0.0157064
TR51190_c0_g1	-0.0151318	0.0105624
TR26072_c0_g1	0.00689908	-0.017115
TR2572_c0_g2	0.011188	0.0146718
TR4291_c0_g1	0.0147801	0.0110443
TR32311_c0_g1	-0.0103545	-0.0152705
TR9273_c0_g1	-0.00194523	-0.0183471
TR6011_c0_g1	-0.0139533	-0.0120659
TR7868_c1_g1	-0.012985	-0.0130978
TR14567_c0_g1	-0.0134953	0.0125712
TR21917_c0_g1	0.0145685	0.0113098
TR2269_c0_g1	-0.0155128	0.0099748
TR12938_c1_g3	0.0145982	0.01127
TR30533_c0_g1	-0.0139252	-0.012091
TR28644_c0_g1	-0.0149194	0.0108341
TR77938_c0_g1	0.0146572	0.0111862
TR870_c0_g1	-0.0155681	0.00987574
TR8449_c0_g1	-0.0129259	-0.0131416
TR9750_c0_g1	-0.012453	0.0135897
TR5884_c0_g1	0.010368	0.0152389
TR4729_c1_g1	0.0149928	0.010719
TR5738_c0_g1	-0.0112792	-0.0145727
TR1555_c2_g1	0.0148233	0.0109421
TR13396_c0_g1	0.015034	0.0106487
TR2327_c1_g1	-0.0161049	0.00894523
TR1300_c3_g1	0.0141967	0.0117377
TR8360_c0_g1	-0.0152012	0.0104013
TR10021_c0_g1	-0.0142775	-0.0116355
TR595_c0_g3	-0.00854155	-0.0163162
TR19703_c0_g1	-0.00988168	0.0155411
TR18111_c0_g1	0.0143963	0.011484
TR851_c3_g1	0.0147716	-0.0109963
TR1704_c1_g1	-0.0157631	0.00951262
TR1599_c0_g1	0.0124818	0.0135338
TR106041_c0_g1	-0.0133265	0.0127019
TR19219_c1_g1	-0.0152154	0.0103631
TR11225_c0_g1	0.0128606	-0.0131675
TR4438_c0_g1	-0.0156157	0.00974076
TR9221_c0_g1	0.00473866	-0.0177801
TR928_c6_g1	-0.0113851	-0.014455
TR14971_c0_g1	-0.0135423	0.0124563
TR17986_c0_g1	-0.014657	0.0111194
TR1570_c1_g1	-0.0138777	-0.0120761
TR9181_c0_g1	-0.0113971	-0.0144397
TR14984_c0_g1	-0.0114906	0.0143637
TR7824_c0_g1	-0.014274	-0.0116012
TR11336_c0_g1	0.0140416	0.011878
TR1530_c5_g1	0.00952967	-0.01573
TR5385_c1_g1	-0.0134053	-0.0125902
TR55062_c0_g1	0.00878247	-0.016158
TR6058_c0_g1	-0.0144583	-0.0113637
TR26532_c0_g1	-0.0110547	0.0146947
TR7106_c0_g1	0.00447346	-0.0178361
TR4770_c2_g1	-0.0138758	-0.0120658
TR15142_c0_g1	-0.0109183	-0.0147946
TR22351_c0_g1	-0.0159213	0.00919735
TR3979_c0_g1	0.0135888	0.0123864
TR18454_c0_g1	-0.00626219	-0.0172876
TR4049_c0_g1	0.0132293	0.012769
TR1089_c3_g1	-0.0114438	0.0143899
TR7484_c0_g1	-0.0147321	0.0109995
TR22536_c1_g1	0.00702953	-0.0169874
TR913_c0_g2	0.0155285	0.00984099
TR51656_c0_g1	0.0137405	0.0122019
TR4167_c4_g1	-0.0131938	-0.0127883
TR875_c1_g1	0.0157625	0.00943759
TR5837_c0_g1	0.0151273	0.010423
TR3335_c0_g1	-0.0150369	-0.0105524
TR516_c0_g1	-0.0156638	0.00959718
TR10231_c0_g1	0.0031292	-0.0180986
TR18892_c0_g1	0.0150606	0.0105093
TR3598_c0_g1	-0.015483	0.00987457
TR14082_c0_g1	-0.00893224	0.0160421
TR37010_c0_g1	-0.0123007	0.0136298
TR10370_c0_g1	-0.0127848	0.0131754
TR18723_c0_g1	-0.0137081	-0.0122116
TR10587_c2_g1	0.00212102	-0.0182354
TR2918_c1_g1	-0.00295188	0.0181176
TR71670_c0_g1	0.0144446	0.0113272
TR6146_c0_g1	0.000342641	0.018342
TR21500_c0_g2	0.0112197	-0.0145131
TR741_c1_g3	0.0152582	0.010183
TR53137_c0_g1	0.0142938	0.0114942
TR2465_c1_g1	-0.0146558	-0.0110279
TR38391_c0_g2	-0.00558864	0.0174684
TR1925_c2_g1	0.0153474	0.0100407
TR3343_c0_g1	-0.0139275	-0.0119309
TR162292_c0_g1	-0.0133984	0.0125186
TR22108_c0_g1	-0.0155703	0.00968096
TR73218_c0_g1	-0.0105939	0.0149632
TR32825_c0_g1	-0.0133997	0.0125125
TR22273_c0_g2	-0.00979097	-0.0154986
TR12242_c0_g1	-0.00842422	-0.0162802
TR37483_c1_g1	-0.0144233	0.0113128
TR10543_c0_g1	0.00993644	-0.015403
TR1467_c0_g1	-0.014206	-0.0115822
TR84758_c0_g1	-0.0158256	0.00924581
TR16452_c0_g1	0.0155313	0.00972406
TR3545_c2_g1	-0.0154573	0.00983783
TR1708_c0_g2	-0.012158	-0.0137056
TR745_c0_g3	0.0151562	0.0102891
TR7493_c0_g1	-0.014168	0.0116094
TR17961_c0_g1	-0.0135465	-0.0123252
TR38996_c0_g1	-0.0111052	0.0145633
TR10119_c0_g2	-0.0132961	0.0125944
TR2405_c0_g1	-0.0148226	0.0107556
TR9168_c0_g1	-0.0154151	0.00988622
TR129007_c0_g1	-0.0119612	0.0138653
TR4253_c0_g1	0.00929579	0.0157744
TR145403_c0_g1	0.0149091	0.0106264
TR57480_c1_g2	-0.00519495	-0.0175555
TR14307_c1_g1	-0.000814698	-0.0182857
TR2302_c0_g1	-0.012502	0.0133689
TR83725_c0_g1	-0.0121411	0.0136953
TR22965_c0_g1	-0.0136147	0.0122304
TR19718_c0_g1	0.0146652	-0.0109438
TR4952_c0_g1	0.00781894	-0.0165415
TR901_c15_g1	0.00479614	-0.0176561
TR11205_c0_g1	0.0129319	0.0129416
TR177470_c0_g1	-0.0152943	0.0100385
TR2554_c0_g1	-0.0148866	0.01063
TR41152_c0_g2	-0.0148331	0.0106949
TR5930_c1_g2	0.0147978	-0.010738
TR22202_c0_g1	0.00893023	0.015954
TR2636_c2_g1	-0.0145117	0.0111216
TR2167_c1_g1	0.0121352	0.0136746
TR3496_c0_g1	0.0144425	0.0112098
TR5634_c1_g1	0.0154411	0.00978714
TR31544_c0_g1	0.00634824	-0.0171386
TR9527_c0_g1	-0.0140559	0.0116809
TR6581_c0_g1	-0.0152644	0.0100445
TR11951_c1_g1	0.0118619	0.0138992
TR7644_c0_g1	-0.00379285	0.0178732
TR3947_c0_g1	-0.0152558	0.0100533
TR31625_c0_g1	0.0104205	-0.0150073
TR15216_c0_g2	-0.0147743	0.0107449
TR35848_c0_g1	-0.015535	0.00960802
TR6032_c0_g1	-0.0151055	0.0102675
TR19123_c0_g1	5.72928e-05	-0.018263
TR4687_c0_g1	-0.0139069	-0.011837
TR36716_c3_g1	-0.0152141	-0.0100964
TR3333_c1_g1	0.0114644	-0.0142103
TR7692_c0_g1	0.0150017	-0.0104054
TR10929_c0_g1	-0.0137521	0.0120078
TR71159_c0_g2	0.0120531	0.0137108
TR413_c2_g1	-0.0142063	0.0114647
TR2646_c1_g1	-0.0153264	0.00991519
TR444_c0_g1	0.0143186	0.011319
TR14371_c0_g1	-0.00762204	-0.0165828
TR13300_c0_g2	-0.00702219	0.0168425
TR411_c2_g1	-0.0140141	0.0116868
TR1380_c7_g1	-0.00678283	-0.0169357
TR9014_c2_g1	-0.00192039	-0.0181419
TR8924_c0_g1	-0.0121449	0.0136117
TR2550_c2_g1	0.0146529	0.0108644
TR33_c1_g1	-0.0137479	-0.0119887
TR1630_c0_g1	-0.0152475	-0.010011
TR12036_c0_g1	-0.0104792	-0.014929
TR13310_c0_g1	0.0147528	0.0107195
TR14755_c0_g1	-0.00971102	0.0154343
TR13932_c0_g3	-0.0145641	0.0109703
TR43834_c0_g1	-0.0116603	0.0140122
TR18253_c0_g1	-0.0151954	0.0100695
TR49244_c0_g1	-0.0150349	0.0103062
TR4541_c0_g1	-0.0151213	-0.0101786
TR3996_c0_g1	-0.0135743	-0.0121653
TR2422_c1_g1	0.0095706	0.015511
TR3359_c2_g1	-0.014926	-0.0104591
TR9234_c0_g1	0.0139943	0.0116758
TR9926_c0_g1	0.0144042	0.0111652
TR2870_c2_g1	0.0143803	0.011195
TR4763_c0_g1	-0.0133173	-0.0124404
TR9158_c0_g1	-0.0116497	-0.0140101
TR41490_c0_g1	-0.0137959	0.0119021
TR7984_c0_g2	-0.0103925	0.0149654
TR3717_c0_g3	0.0135425	0.0121847
TR7475_c0_g1	-0.0126997	0.0130596
TR18674_c0_g1	-0.00234602	0.0180624
TR4926_c2_g2	-0.0149216	0.0104446
TR13845_c0_g1	-0.0138788	0.011793
TR25829_c0_g1	0.0147763	0.0106461
TR8841_c0_g1	-0.0152851	0.00990085
TR15724_c0_g1	-0.0117286	-0.0139303
TR244_c1_g1	-0.0152235	0.00998797
TR2500_c4_g1	-0.0120925	0.0136105
TR4042_c0_g1	-0.0149898	-0.0103324
TR4552_c0_g1	0.00883301	0.0159188
TR134852_c0_g1	-0.0132688	0.0124632
TR11788_c0_g1	-0.0144198	0.0111098
TR3421_c0_g1	-0.0151214	-0.0101329
TR5063_c0_g1	-0.0128392	-0.0129008
TR27749_c0_g1	-0.0137023	0.0119765
TR28984_c1_g1	0.00960081	-0.0154581
TR20457_c0_g1	-0.0135315	0.0121639
TR189_c7_g1	-0.0142625	-0.0112948
TR42683_c0_g1	-0.00849217	-0.0160882
TR24256_c0_g1	-0.0108226	0.0146142
TR4240_c0_g4	-0.0148492	0.0104973
TR1795_c1_g3	0.00940678	0.0155628
TR2563_c1_g1	0.0143307	0.0111942
TR3104_c0_g1	0.0025465	0.0180052
TR676_c0_g1	-0.01192	-0.0137272
TR23764_c0_g3	0.00245753	-0.0180105
TR8930_c0_g1	-0.0147905	0.0105663
TR10625_c0_g1	-0.0129369	0.0127628
TR5994_c0_g1	-0.0140687	-0.0114993
TR29558_c0_g1	0.0135663	0.0120873
TR24139_c0_g1	-0.0152221	-0.00992119
TR11145_c0_g1	0.0161693	0.00828526
TR3929_c0_g4	-0.0163975	0.00782238
TR11265_c0_g1	-0.0133621	-0.0123093
TR2595_c1_g1	-0.0154759	0.00951579
TR21951_c0_g2	0.0155722	0.00935425
TR106209_c1_g1	0.0148952	0.0103938
TR3407_c0_g2	0.00948039	0.0154909
TR14994_c0_g1	0.014371	0.011104
TR9267_c0_g1	-0.0130835	0.0125954
TR36542_c0_g1	-0.0149818	0.0102635
TR9262_c0_g1	-0.0141564	-0.011374
TR1441_c1_g2	0.0144801	0.0109589
TR4589_c0_g2	-0.0145961	-0.010803
TR3771_c0_g1	0.015265	0.00983022
TR47539_c0_g1	-0.0152598	0.00983572
TR184299_c0_g1	-0.01546	0.00951482
TR5458_c0_g2	0.0151442	0.0100087
TR8215_c0_g1	0.0135098	0.0121238
TR3200_c0_g2	0.0126884	-0.012979
TR35595_c0_g1	-0.0117009	0.0138752
TR445_c2_g1	0.0145424	0.0108585
TR10480_c0_g1	-0.0155515	0.00935562
TR20_c6_g1	-0.0142206	-0.0112753
TR1219_c2_g1	-0.00635246	0.0169954
TR2508_c1_g1	0.00205441	-0.0180262
TR20668_c0_g1	-0.00844352	0.016058
TR43787_c0_g1	0.0151978	0.00990615
TR4111_c0_g1	0.0103514	-0.0148957
TR15336_c0_g1	-0.0125285	0.0131153
TR1045_c1_g1	-0.0086362	-0.0159494
TR2158_c0_g3	-0.0156211	0.00921248
TR3537_c3_g1	-0.00986009	-0.0152202
TR4725_c0_g1	-0.0147527	0.0105468
TR9333_c0_g1	0.0141863	0.011292
TR112_c1_g1	-0.0131705	-0.012461
TR305_c0_g1	0.00850169	0.016014
TR17421_c2_g3	0.0114198	0.0140824
TR5743_c2_g1	0.0142008	0.011271
TR7351_c0_g2	0.00155661	-0.0180621
TR11525_c0_g1	0.0154463	0.00948688
TR2825_c0_g1	-0.0146705	-0.0106437
TR15353_c0_g1	-0.0122833	0.0133268
TR15201_c0_g1	-0.0154019	0.00955272
TR7650_c0_g1	-0.0157037	0.00902874
TR18606_c0_g2	-0.012942	-0.0126729
TR2158_c0_g1	-0.0159353	0.00860567
TR1159_c0_g1	0.014302	0.0111103
TR49291_c0_g1	-0.0103384	0.0148684
TR28548_c0_g1	0.0048409	-0.0174456
TR19124_c1_g1	0.015894	0.00866611
TR575_c1_g1	-0.0127716	0.0128292
TR85_c0_g1	-0.0148937	0.0102895
TR73_c3_g1	-0.0153658	0.0095699
TR5178_c0_g1	0.00899844	0.0157046
TR12874_c0_g1	-0.0145225	-0.0108029
TR32051_c0_g1	-0.0130125	0.0125777
TR24391_c0_g1	-0.0133887	0.0121726
TR609_c3_g1	-0.0161337	0.00819031
TR3778_c2_g1	0.0151679	0.00986246
TR1101_c1_g1	-0.0148414	-0.0103438
TR1592_c0_g1	0.00958882	-0.0153373
TR72538_c0_g1	-0.0145739	-0.0107127
TR1195_c0_g1	0.0130995	0.0124698
TR1473_c1_g2	-0.0143477	0.0110069
TR5745_c3_g1	0.0148049	0.0103828
TR5985_c1_g1	-0.012748	0.0128189
TR1799_c2_g1	-0.0135919	0.0119174
TR12756_c0_g1	-0.0126211	0.0129367
TR528_c2_g2	-0.00909453	-0.0156175
TR2695_c1_g1	-0.0137326	0.0117486
TR6944_c1_g1	0.0148069	0.0103602
TR6563_c0_g1	-0.0150804	-0.00995697
TR8686_c0_g1	-0.0159355	0.00852107
TR2441_c1_g1	-0.0130365	-0.0125132
TR32036_c0_g1	-0.0123532	0.0131868
TR16680_c0_g1	-0.0156067	0.00910601
TR118_c0_g1	0.0110423	0.0143007
TR11356_c0_g1	0.00523427	-0.0172919
TR57832_c0_g1	-0.0147837	-0.0103813
TR11_c3_g1	-0.0106799	0.0145688
TR3730_c4_g1	0.011768	-0.0137039
TR4685_c0_g2	-0.0145746	0.0106705
TR912_c1_g2	-0.0140229	-0.0113833
TR23054_c0_g1	0.00506542	-0.0173345
TR10946_c0_g1	0.00795957	0.0162106
TR31641_c0_g1	-0.0146782	0.0105199
TR3735_c0_g1	-0.0143241	0.0109968
TR15033_c0_g2	-0.0101558	0.0149321
TR5340_c2_g1	-0.0142229	0.0111188
TR5445_c0_g1	0.0154975	0.0092597
TR4446_c0_g2	-0.0154367	-0.00935844
TR18443_c0_g1	-0.0150075	0.0100271
TR86_c0_g1	0.0147831	0.0103538
TR2490_c0_g1	-0.014327	-0.0109749
TR23822_c0_g1	-0.0144002	0.0108749
TR4607_c1_g1	-0.0143425	-0.0109482
TR29145_c0_g1	-0.0153637	0.00945811
TR6458_c0_g1	-0.0156915	0.00890167
TR1073_c0_g1	0.0155212	0.00919392
TR16165_c1_g1	-0.0152981	0.00955951
TR24062_c0_g2	0.0145292	0.0106916
TR10891_c0_g1	-0.0160482	0.00823675
TR18282_c0_g1	0.015105	0.00985944
TR8748_c0_g1	-0.0101568	0.014904
TR37463_c0_g1	-0.0144086	0.0108476
TR6223_c0_g1	-0.0160236	0.00827267
TR7840_c0_g1	-0.0161887	0.00794443
TR10105_c1_g1	-0.015595	-0.00905078
TR2837_c0_g1	-0.0131301	-0.0123554
TR7449_c0_g1	-0.0109815	0.0142958
TR7643_c1_g1	-0.0152428	0.00962069
TR8172_c0_g1	-0.00228335	0.0178795
TR5374_c1_g1	-0.0156808	0.00888466
TR696_c1_g1	-0.0129732	-0.0125099
TR5243_c0_g1	-0.0126185	0.0128664
TR14316_c0_g1	-0.00167972	-0.0179397
TR3417_c2_g1	0.0115348	0.0138421
TR120322_c0_g1	-0.0128824	0.0125937
TR61908_c0_g1	0.00422672	-0.0175086
TR5099_c0_g1	-0.0141069	-0.0111961
TR5184_c0_g1	-0.0144835	-0.0107045
TR6406_c0_g1	-0.0136063	-0.0117959
TR45046_c0_g1	0.0103211	0.0147553
TR4819_c0_g1	0.00534614	-0.0171936
TR4290_c0_g1	0.00811198	0.0160736
TR4351_c0_g1	-0.015012	0.00993908
TR1531_c0_g1	-0.0136269	0.011766
TR23947_c0_g1	-0.0142945	0.0109392
TR286_c0_g1	-0.0133504	-0.0120721
TR6974_c0_g1	-0.0160609	0.00811963
TR2989_c0_g1	-0.0115193	0.0138238
TR10700_c0_g3	-0.0151121	0.00976225
TR988_c1_g1	-0.0154489	0.00921634
TR12409_c1_g1	-0.0150087	-0.00991582
TR2485_c1_g1	0.0127214	0.0127176
TR15262_c0_g1	-0.0123981	0.0130324
TR485_c0_g1	0.0147535	0.0102833
TR44716_c0_g1	-0.0163186	0.00755112
TR9734_c0_g1	-0.0153374	0.00938325
TR8447_c1_g1	-0.0108745	-0.0143182
TR2692_c0_g1	0.0152537	0.00951697
TR9554_c0_g1	-0.0145595	-0.0105454
TR4725_c1_g1	-0.0117695	0.0135887
TR913_c0_g1	0.0154806	0.00913721
TR11634_c0_g1	-0.0149341	0.0100052
TR23359_c0_g1	-0.0138949	0.0113952
TR8994_c0_g1	0.0136568	0.0116785
TR20932_c0_g2	-0.0129045	0.0125013
TR54929_c0_g1	0.0104635	-0.0146055
TR2693_c0_g1	0.0152336	-0.00952397
TR1601_c1_g1	0.0149278	0.00999342
TR5102_c0_g1	-0.0152609	-0.00947629
TR2112_c0_g2	0.0120565	0.0133125
TR36253_c0_g1	0.0158147	0.00851265
TR4383_c3_g2	-0.0150163	-0.00985133
TR1710_c1_g2	-0.0148333	-0.0101225
TR24245_c0_g1	-0.0164309	0.00724285
TR16048_c1_g1	-0.0162834	0.00756479
TR5301_c0_g1	0.00978806	0.0150502
TR7190_c3_g1	0.0135339	0.0117919
TR46005_c0_g1	-0.0133442	0.0120038
TR1769_c1_g2	-0.0157905	0.00853328
TR1441_c1_g1	-0.0156824	-0.00872988
TR7148_c2_g4	-0.0151931	0.00955559
TR8396_c0_g2	-0.0139411	0.0113026
TR7353_c2_g1	-0.0147507	0.010223
TR10642_c0_g1	-0.0138924	0.0113613
TR36343_c0_g1	-0.0100691	0.0148553
TR6189_c0_g1	-0.0160263	0.00807401
TR19336_c0_g1	0.0151599	0.00960121
TR15261_c0_g2	-0.0149553	0.00991597
TR53960_c0_g1	-0.0155899	0.00888333
TR14866_c0_g1	-0.0134083	-0.0119219
TR62_c3_g1	-0.0154319	-0.00914991
TR7241_c0_g1	-0.014518	0.0105386
TR20530_c0_g1	0.0140473	0.0111563
TR22236_c0_g1	-0.0150999	-0.00967995
TR14833_c0_g1	0.0147557	0.0101925
TR271_c0_g1	-0.0101709	0.014766
TR3486_c0_g2	0.0148358	0.0100673
TR12532_c1_g1	-0.014398	0.0106838
TR186_c0_g1	0.0154806	0.00904344
TR2318_c0_g1	-0.0113901	0.0138446
TR7719_c0_g2	-0.0160321	0.00802138
TR6645_c0_g1	0.0128671	0.0124822
TR17789_c0_g1	-0.0139278	0.0112814
TR8319_c0_g1	-0.0155995	-0.00882561
TR8557_c0_g1	0.0138808	0.0113382
TR7924_c1_g1	-0.0120821	0.0132362
TR25256_c0_g1	-0.0135871	0.0116854
TR2043_c0_g1	0.0143781	0.0106938
TR12167_c0_g1	-0.0151626	0.00954051
TR7879_c0_g1	0.015313	0.00929526
TR23021_c0_g1	-0.0155438	0.00890181
TR1828_c0_g2	0.0154613	0.00904387
TR817_c4_g1	0.0151626	0.00953486
TR6315_c1_g1	-0.0161864	-0.00766904
TR13700_c0_g1	-0.0137729	-0.0114502
TR15917_c0_g1	-0.0161522	0.00773997
TR3089_c0_g2	-0.0150908	-0.00964433
TR1932_c0_g1	-0.0152948	0.00931518
TR335_c0_g9	-0.015604	0.00878188
TR11609_c0_g1	-0.0125073	0.0128126
TR15560_c1_g2	0.0142035	0.0108956
TR2972_c2_g1	0.0135861	0.0116555
TR12458_c0_g1	-0.00291858	-0.0176567
TR9948_c0_g1	-0.0151137	0.00958361
TR1337_c1_g2	0.015883	0.00823992
TR9307_c0_g1	-0.0149447	-0.00983821
TR2661_c0_g3	-0.0134419	-0.0118061
TR450_c0_g1	0.0157595	0.00846768
TR5211_c0_g1	0.0147286	0.0101542
TR13174_c0_g1	-0.0149797	0.00977851
TR2812_c0_g2	-0.0135697	-0.0116564
TR14674_c0_g1	-0.015903	-0.00818373
TR106_c1_g1	0.0128271	0.0124636
TR3755_c0_g1	-0.0159329	0.00812412
TR10152_c0_g2	-0.012244	0.0130347
TR7378_c0_g1	0.0144133	0.0105846
TR2753_c0_g1	-0.0159198	-0.00814476
TR1589_c0_g1	-0.0149664	-0.00978349
TR7291_c3_g1	-0.01487	0.00991971
TR2664_c1_g1	0.00719071	0.0163647
TR6188_c0_g2	-0.0165287	0.00679067
TR7181_c0_g1	-0.0160685	-0.00781751
TR3658_c0_g1	-0.014281	-0.0107387
TR32879_c0_g1	0.0152652	0.00928593
TR41839_c0_g1	-0.0150787	0.00958395
TR1671_c0_g1	-0.0141566	-0.0108983
TR51117_c1_g2	-0.0149122	0.00983871
TR3511_c2_g1	0.0134302	0.0117794
TR714_c1_g1	-0.0151433	0.00947343
TR2392_c1_g2	0.00817181	-0.0158821
TR19702_c3_g1	-0.0101107	-0.0147226
TR2576_c2_g3	0.000691171	0.017846
TR28_c2_g2	-0.0148354	-0.00994299
TR18161_c1_g2	-0.0113948	0.0137478
TR40445_c1_g1	-0.0165694	0.00665422
TR4202_c0_g1	0.0157435	0.00842075
TR14483_c0_g1	-0.0140024	-0.0110759
TR61089_c1_g1	0.0167485	0.00617324
TR5056_c0_g1	0.0147966	0.00998393
TR3550_c0_g2	-0.0157691	-0.00835999
TR47393_c0_g1	-0.00723187	-0.0163155
TR2236_c2_g1	-0.0154015	-0.00901523
TR8758_c0_g1	-0.016316	0.00722855
TR44049_c0_g1	0.0144271	-0.0105029
TR10700_c1_g1	0.0129759	0.01225
TR1964_c1_g3	0.0151211	0.00947397
TR12454_c3_g1	0.000107984	-0.0178432
TR535_c2_g3	-0.0150912	0.0095204
TR21702_c0_g1	-0.0155775	0.00869711
TR4455_c0_g1	-0.014175	-0.0108283
TR2731_c0_g1	0.010846	-0.01416
TR16081_c0_g1	-0.0142858	0.0106767
TR18732_c0_g1	-0.0143419	0.010599
TR51407_c1_g1	0.0150712	0.0095328
TR13795_c0_g1	0.0107433	0.0142325
TR2769_c0_g1	-0.0116413	-0.0135042
TR1980_c0_g1	-0.0150791	0.00950969
TR15753_c0_g1	-0.0149694	-0.0096805
TR15961_c1_g2	0.0133733	0.0117858
TR297_c0_g1	-0.0137468	0.0113474
TR90044_c0_g1	-0.0139662	0.0110758
TR360_c1_g1	0.00887119	0.01546
TR2698_c0_g1	-0.0157256	-0.00838931
TR3074_c0_g1	-0.0149609	-0.00968416
TR6034_c0_g1	0.00414116	-0.0173337
TR24619_c0_g1	-0.0121092	0.0130709
TR20562_c0_g1	-0.00799813	0.0159212
TR26468_c0_g1	0.0143766	0.0105226
TR10688_c0_g1	-0.0130752	0.0121013
TR14650_c0_g1	-0.0153846	0.00898334
TR6039_c0_g1	-0.0166002	0.00646641
TR12117_c1_g2	-0.0134042	0.011734
TR1058_c3_g1	-0.0159824	0.00786888
TR25382_c0_g1	0.0132973	-0.0118538
TR4024_c1_g2	0.0126931	0.0124963
TR61977_c0_g1	-0.0118066	0.0133345
TR4059_c0_g1	-0.0165911	0.00647133
TR8283_c0_g1	-0.01511	0.00942455
TR2452_c0_g1	-0.0150954	-0.00944701
TR3338_c0_g1	0.0145726	0.0102347
TR8513_c0_g1	0.0134443	0.0116766
TR502_c0_g2	-0.0141591	0.0107977
TR1417_c1_g1	0.0149987	0.00959109
TR36062_c0_g1	-0.0148192	-0.00986175
TR19628_c0_g1	0.0135865	0.0115005
TR49610_c0_g2	0.0121894	0.0129699
TR1376_c0_g1	-0.0157291	-0.00832688
TR1658_c2_g1	0.0137926	0.0112459
TR20693_c0_g1	0.000386888	-0.0177905
TR44_c0_g2	-0.0163326	-0.00705879
TR2439_c1_g1	-0.0157082	-0.0083561
TR9372_c0_g4	-0.0152164	-0.0092212
TR2411_c0_g1	-0.0154941	0.00873867
TR12409_c0_g1	-0.0137642	0.011268
TR21482_c0_g1	0.00224201	-0.0176463
TR6709_c0_g1	-0.0102543	0.0145346
TR5428_c0_g3	-0.0145376	-0.0102488
TR7184_c0_g1	-0.0155109	0.00870523
TR290_c11_g1	0.0121944	0.0129463
TR3298_c1_g1	-0.0157111	-0.00833359
TR27174_c0_g2	-0.00361632	-0.0174111
TR4574_c0_g1	-0.0149534	-0.00962111
TR2529_c1_g1	0.0142663	0.0106132
TR15337_c0_g1	-0.0163086	0.00707996
TR18345_c0_g1	-0.0155605	0.00859577
TR35673_c0_g2	-0.00821329	0.0157655
TR38058_c0_g1	-0.0158868	0.00797562
TR14403_c0_g1	-0.0151462	0.0093034
TR17029_c0_g1	-0.0164119	0.00682624
TR3627_c0_g1	-0.014219	0.0106631
TR47903_c0_g1	-0.0127238	-0.0124081
TR2834_c0_g1	0.015878	0.0079751
TR65292_c1_g1	0.0124017	-0.0127205
TR3776_c0_g1	0.0152244	0.00915527
TR44649_c0_g1	-0.0162334	0.00721517
TR347_c8_g1	-0.0164088	0.006803
TR15961_c1_g1	0.0145391	0.0102049
TR8169_c0_g1	0.0147498	0.00989709
TR9593_c0_g1	-0.0154426	-0.00877206
TR13520_c0_g1	-0.0137746	0.0112106
TR7756_c0_g1	0.0130011	0.0120987
TR14152_c0_g1	-0.0157096	-0.00828072
TR897_c0_g1	-0.00709003	-0.0162812
TR11398_c0_g1	0.00866233	0.0154999
TR30644_c1_g1	0.0154474	0.00875445
TR2855_c0_g3	-0.00886463	-0.015383
TR4748_c0_g1	-0.0145753	-0.010134
TR9081_c0_g1	-0.0094813	0.0150077
TR23764_c3_g1	-0.0156004	-0.00846365
TR9861_c0_g1	0.0122671	0.0128262
TR16888_c0_g1	-0.0142496	0.0105792
TR3973_c0_g1	-0.011233	-0.0137385
TR11615_c0_g1	-0.0165765	0.0063357
TR280_c0_g2	0.0032913	-0.0174377
TR20409_c0_g1	-0.00562043	-0.0168302
TR891_c1_g1	0.0143805	0.0103943
TR47033_c0_g1	-0.00412786	0.0172533
TR4653_c1_g1	-0.0164797	0.00656655
TR1645_c1_g1	-0.0142717	-0.010532
TR33717_c1_g1	0.0118843	0.013165
TR22038_c0_g1	0.00540701	-0.0168909
TR2779_c1_g1	-0.0144249	-0.0103154
TR1330_c0_g1	-0.0151881	-0.00915408
TR4926_c2_g1	-0.0158846	0.00787951
TR1888_c0_g1	0.015621	0.00838737
TR4770_c1_g1	0.0028564	0.0174981
TR81681_c0_g1	-0.0129175	0.0121434
TR11400_c0_g1	-0.0151113	0.00927203
TR113_c3_g1	-0.0153634	0.00884321
TR16239_c1_g1	-0.0108132	0.0140438
TR13140_c1_g1	0.015191	0.00913165
TR21162_c0_g1	0.00567919	-0.0167858
TR3337_c4_g1	-0.0164125	0.00668117
TR6412_c0_g3	-0.0155489	0.00849693
TR13905_c0_g1	-0.00587739	0.0167158
TR20797_c0_g1	0.0050064	0.0169964
TR17328_c0_g2	-0.0149856	0.00945289
TR23255_c0_g1	-0.0122457	0.0128033
TR60337_c0_g1	-0.0121318	-0.0129092
TR1343_c0_g1	-0.015764	0.00808018
TR3297_c0_g1	0.0156403	0.0083121
TR4968_c0_g1	-0.0137348	0.0111818
TR40_c2_g1	-0.01519	-0.00910296
TR3277_c0_g1	-0.0163207	0.00687178
TR24541_c0_g1	0.00155956	0.0176374
TR51194_c0_g1	-0.0154285	0.00868538
TR1089_c5_g1	-0.0152604	0.00897629
TR16697_c0_g1	0.0155741	0.00841538
TR5083_c0_g1	0.0150741	0.00927992
TR2655_c0_g1	-0.0163076	0.00688429
TR12389_c0_g1	0.0145103	0.0101372
[truncated: 6,415 more rows]

## Sheet: X_loading
X	Loading_1	Loading_2
14.16_409.1882m/z	-0.0062932	-0.0993419
4.57_323.1246m/z	0.00611778	-0.0989383
15.42_293.2473m/z	-0.0109272	-0.0983312
15.75_295.2630m/z	0.00375281	-0.0985885
14.60_263.2367m/z	0.00615652	-0.0976702
15.11_429.1946m/z	-0.00617005	-0.0976305
14.60_355.2832m/z	0.00569753	-0.0970372
14.70_653.2608m/z	-0.0618803	-0.0735201
14.26_335.2582m/z	-0.0169933	-0.0945662
14.26_243.2106m/z	-0.0179878	-0.0937513
14.26_261.2211m/z	-0.0176709	-0.0937922
15.37_365.2684m/z	-0.00263071	-0.0953521
14.26_353.2683m/z	-0.0156629	-0.0939925
10.84_929.5126m/z	0.0771857	0.0555136
14.71_309.1671m/z	0.00777028	-0.0943993
14.70_245.2261m/z	0.00481883	-0.0941044
14.70_337.2735m/z	0.00295774	-0.0941751
10.83_945.7187m/z	0.0753204	0.0553312
13.83_703.2256m/z	-0.0831163	-0.0422863
15.46_713.2560m/z	-0.078279	-0.0503851
14.70_354.2764n	0.000866159	-0.0928782
14.26_349.1982m/z	-0.0142062	-0.0913973
15.58_567.4195m/z	-0.0821925	-0.0418057
13.83_719.2211m/z	-0.0825987	-0.04041
13.83_721.2324m/z	-0.0806884	-0.0439418
13.35_689.2099m/z	-0.0840009	-0.0371587
15.18_273.1307m/z	-0.0688045	-0.0605245
15.20_827.4928m/z	-0.0819243	-0.0408381
3.73_482.1745m/z	-0.0273862	-0.0872657
0.94_129.0192m/z	-0.0301986	-0.0860867
6.05_501.3218m/z	-0.0827387	0.0378132
4.10_229.0858m/z	0.0245641	-0.087394
0.95_87.0086m/z	-0.0212355	-0.0882578
18.08_546.3906n	0.00855266	0.0898661
15.00_609.2711m/z	-0.0852587	-0.0296619
15.17_265.2524m/z	0.0024838	-0.0902096
5.20_553.1925m/z	-0.0869011	0.023211
15.07_357.2992m/z	0.00238903	-0.0898083
4.16_441.1731m/z	0.00305818	0.0897129
15.76_652.2898n	-0.0846749	-0.0293604
15.41_671.2710m/z	-0.0719499	-0.0532599
4.16_257.1382m/z	0.0163693	0.0876446
0.66_199.0009m/z	0.00727804	-0.0887776
4.43_281.1029m/z	0.0431532	-0.0776953
6.80_599.1983m/z	0.0815079	0.0352692
15.41_683.2455m/z	-0.0716654	-0.0523669
0.77_606.0743m/z	-0.0787836	-0.040321
3.79_448.1942m/z	0.00587183	-0.0880234
1.12_111.0086m/z	-0.030148	-0.0822303
0.95_130.9984m/z	-0.0166125	-0.0847084
5.65_521.3116m/z	-0.0812648	-0.0277856
1.12_191.0193m/z	-0.030462	-0.0800197
15.11_829.5077m/z	-0.0673386	-0.0521365
4.26_857.2342m/z	-0.0736482	0.0427158
15.11_824.5438m/z	-0.0662102	-0.0533362
11.17_943.5271m/z	0.072864	-0.0434987
6.81_355.1172m/z	0.0468357	0.0707166
15.07_339.2891m/z	0.00254199	-0.0847564
5.20_341.1017m/z	-0.0710455	0.0461791
6.65_693.2043m/z	-0.0821405	0.0203209
15.63_654.2700n	-0.0483973	-0.0694088
1.09_811.2395m/z	-0.0510464	-0.0670991
0.69_441.1005m/z	0.020449	-0.0813714
6.13_177.0190m/z	0.0727011	0.0417752
1.12_173.0089m/z	-0.0303444	-0.0781477
5.19_359.1124m/z	-0.0718815	0.0422631
15.18_269.1358m/z	0.00481425	-0.0828314
6.53_595.2033m/z	-0.0242899	0.0793157
7.02_287.0549m/z	-0.0771924	0.0300795
7.02_433.1130m/z	-0.0764509	0.0310324
6.67_365.0512m/z	0.0712824	0.0411366
4.53_329.1109n	0.0600773	-0.0561611
3.93_281.1389m/z	-0.0448895	0.0688838
3.81_272.0925m/z	0.027447	-0.0774685
3.66_430.1557m/z	-0.0264276	-0.0776808
4.47_337.0925m/z	0.0800558	0.0174799
6.24_535.1814m/z	0.00179087	0.0818074
5.13_179.0558m/z	0.0158579	-0.080262
6.13_537.1969m/z	0.0136041	0.080371
6.54_515.1172m/z	0.0723548	0.0373155
0.66_585.1428m/z	0.0537278	-0.0611157
6.17_827.4432m/z	0.0715163	0.0386706
4.36_404.1542m/z	0.0489478	-0.0648522
11.83_446.1935m/z	0.028033	-0.0761468
0.67_261.0370m/z	0.0324975	-0.0743015
6.18_665.3900m/z	0.0709939	0.0391768
6.54_337.0917m/z	0.0708392	0.0394498
6.17_467.3156m/z	0.0714291	0.0382732
6.18_811.4481m/z	0.0710761	0.0386096
7.19_679.3698m/z	-0.0594824	0.0548063
4.73_563.1403m/z	-0.07506	0.0295342
4.65_419.0973m/z	-0.0730054	0.0340179
6.54_355.1025m/z	0.0699845	0.0398628
12.33_471.3473m/z	-0.0792273	-0.0135649
3.77_799.2302m/z	0.0664635	0.0449748
3.87_730.1780m/z	0.0606897	-0.0524857
3.89_299.1133m/z	0.0431075	-0.0675946
5.21_612.2047n	-0.031794	0.07358
11.83_429.1907m/z	0.0296604	-0.0744501
6.91_355.1172m/z	0.0247055	0.0762059
6.14_375.1439m/z	0.0119506	0.0791988
10.98_857.4538m/z	-0.0365744	0.0711908
6.66_333.0614m/z	0.0704835	0.0376064
4.35_778.2914m/z	0.0168493	-0.078039
6.53_516.1268n	0.0702755	0.0377047
3.86_187.0732m/z	0.0571109	-0.0554583
7.13_285.0401m/z	-0.0742486	0.0285783
0.71_358.1491m/z	0.0250271	-0.0753723
6.17_973.5015m/z	0.0702391	0.0370515
4.65_565.1552m/z	-0.0734662	0.0298781
5.92_449.1782m/z	0.0714161	0.034292
14.16_439.3214m/z	-0.024169	-0.0753703
14.03_291.2319m/z	-0.0136376	-0.0778922
5.03_534.1606m/z	-0.0616413	0.049442
3.87_439.1384m/z	0.0721572	0.0321701
10.68_673.3922m/z	0.0765448	0.0194222
6.66_349.0561m/z	0.0700734	0.0362012
10.93_813.4638m/z	-0.0295049	0.0731361
3.69_496.1807m/z	0.0122248	-0.0778098
6.67_290.0786n	0.0702544	0.035521
4.34_579.1357m/z	-0.0730621	0.0290758
6.66_173.0452m/z	0.0706353	0.034455
6.97_469.3311m/z	0.0336813	0.0709683
7.13_431.0980m/z	-0.0734395	0.0277234
7.46_529.1347m/z	0.00342071	0.0784124
8.06_599.3585m/z	0.0778442	-0.00951706
5.74_551.1767m/z	-0.0580261	0.0525971
3.72_450.1959m/z	0.0425748	-0.0657279
4.23_473.1655m/z	0.0551462	-0.0555416
6.63_579.2084m/z	-0.0560982	0.0543037
5.63_623.1619m/z	-0.0721957	0.0296186
6.03_317.0655m/z	-0.0711303	0.0320317
3.86_205.0851m/z	0.0528913	-0.0573377
6.66_468.1054n	0.0692084	0.0358405
6.99_447.0931m/z	-0.0718871	0.0300698
6.66_134.0364n	0.0697198	0.0345186
4.16_286.1435m/z	-0.0248627	-0.073537
6.26_301.0349m/z	-0.0724105	0.027745
5.50_287.0548m/z	-0.0645678	0.042762
4.12_887.2453m/z	-0.0683472	0.0363245
0.73_133.0140m/z	-0.0656799	-0.0409346
15.12_425.3771m/z	-0.0667153	0.0391721
3.72_552.2073m/z	0.0470446	-0.0611995
11.21_643.2810m/z	-0.0770342	-0.00339013
6.66_177.0189m/z	0.068119	0.0360885
8.07_943.4904m/z	0.0765392	-0.00855208
5.03_696.2142m/z	-0.060208	0.0476451
5.83_449.1077m/z	-0.0655252	0.0399617
8.07_781.4371m/z	0.0762876	-0.00797757
8.07_524.0825m/z	0.0755566	-0.0124886
11.21_485.3262m/z	-0.0765342	-0.00110201
3.59_522.1969m/z	0.0411137	-0.0644824
14.14_423.3257m/z	-0.0253884	-0.0721271
7.22_317.0654m/z	-0.0717255	0.0263506
0.63_132.0301m/z	-0.0338734	-0.0684469
3.86_121.0645m/z	0.0510767	-0.0567056
5.83_595.1658m/z	-0.0656828	0.0385849
7.35_461.1085m/z	-0.0714225	0.0255759
6.26_445.0772m/z	-0.0712105	0.0260887
7.23_463.1238m/z	-0.0712424	0.0258877
5.25_367.1032m/z	-0.0581712	0.0482998
7.35_513.1392m/z	-0.00795992	0.0749983
7.59_501.3214m/z	0.0637652	0.040106
8.07_583.3634m/z	0.0745313	-0.0107162
6.41_435.1650m/z	-0.00403922	0.0751321
6.45_137.0959m/z	-0.0698124	0.0280353
10.35_691.2977m/z	0.0717868	0.0224094
4.06_138.0549m/z	0.059324	0.0460434
10.56_956.4993n	0.0749196	0.00425218
3.61_552.2072m/z	0.0482283	-0.0572538
6.45_133.1010m/z	-0.0687934	0.0290562
7.59_519.3323m/z	0.0645828	0.0373319
3.58_566.1230m/z	-0.0461748	-0.0585407
6.44_191.1430m/z	-0.0670577	0.0325228
7.48_455.3518m/z	0.0511904	0.0541335
7.59_483.3107m/z	0.0638728	0.038229
0.66_277.0325m/z	0.0518145	-0.0534448
8.07_187.1479m/z	0.0739182	-0.00804051
6.53_401.1595m/z	-0.0479612	0.0566387
3.62_490.1697m/z	0.0334035	-0.0662735
1.55_767.2460m/z	-0.0681648	-0.0290707
8.31_571.2032m/z	0.0724383	0.0155659
8.07_635.3797m/z	0.0735822	-0.00803553
3.92_320.1130m/z	-0.0643623	0.0363389
11.38_441.3364m/z	-0.073037	-0.0107775
3.86_247.0964m/z	0.0474931	-0.0565233
4.62_640.2024m/z	0.0541411	-0.0501886
10.93_469.3670m/z	0.064357	-0.0358095
3.84_311.0932m/z	0.0541994	0.049644
10.56_795.4526m/z	0.0731443	0.00704357
10.34_473.3625m/z	0.0452159	0.0578873
0.81_275.0213m/z	-0.0607897	-0.0410741
6.14_623.1614m/z	-0.0706634	0.0196704
3.91_941.2934m/z	0.0669336	0.0299318
4.25_785.2142m/z	-0.0647694	0.0338801
0.66_98.9838m/z	0.0463153	-0.0563859
9.34_685.4165m/z	0.0107541	0.0720412
8.07_797.4325m/z	0.0720379	-0.0100177
6.06_287.0549m/z	-0.0517406	0.0510862
0.73_115.0036m/z	-0.0567167	-0.0453949
3.86_329.0892m/z	0.0263874	-0.0675721
11.75_539.2990m/z	-0.0471438	-0.0549483
11.72_173.1322m/z	-0.0398322	-0.0603656
10.87_648.3744m/z	-0.0433496	-0.0578523
6.03_924.1408m/z	0.0558493	0.0458876
11.72_485.2900m/z	-0.0349708	-0.0630715
4.87_503.1911m/z	-0.0664429	0.028041
3.75_293.0874m/z	0.0351525	-0.0629401
11.38_471.3468m/z	-0.0717073	-0.00723206
11.72_196.1487n	-0.037911	-0.0610269
3.92_130.0648m/z	-0.0600494	0.0393016
6.53_580.2159n	-0.0372669	0.0613096
0.63_130.0497m/z	-0.0582863	-0.0417745
11.38_488.3500n	-0.0714057	-0.00582176
3.71_452.1665m/z	0.0193764	-0.0689453
11.38_425.3413m/z	-0.0714069	-0.00509275
6.53_418.1621m/z	-0.0409459	0.0587072
11.38_407.3308m/z	-0.0712951	-0.00611556
5.74_854.1216m/z	-0.070005	0.0142976
0.91_348.0703m/z	-0.0592388	-0.0398715
3.77_549.2080m/z	0.0686026	-0.0195167
7.48_473.3625m/z	0.050547	0.0502164
11.38_435.3257m/z	-0.0712193	-0.000841851
4.56_627.1564m/z	0.0649444	0.0292251
5.08_640.1645n	0.0710363	0.00455677
3.73_510.1948m/z	0.0705565	0.00915424
11.72_204.1512n	-0.0444923	-0.0552709
3.85_300.1208n	0.0398135	-0.0584448
6.32_857.4173m/z	-0.0674585	0.0211373
6.15_303.0498m/z	-0.0659724	0.0248795
11.39_287.1640m/z	-0.0697831	-0.00999427
3.99_492.1503m/z	-0.0573725	-0.0408976
5.99_535.1807m/z	-0.0374718	0.0584759
6.58_325.1431m/z	-0.0599484	0.0347296
1.54_326.1235m/z	0.00318183	-0.0688176
5.88_375.1436m/z	-0.0056954	0.0686215
9.48_978.5044m/z	0.0688448	0.000559582
9.04_415.1749m/z	0.0385241	-0.057042
4.76_455.3157m/z	0.0546127	0.0417215
9.48_995.4648m/z	0.0686633	0.00133515
4.80_735.2136m/z	-0.0196462	0.0656242
9.59_617.3689m/z	0.0682924	0.000846463
11.72_407.2945m/z	-0.0395131	-0.0556645
4.94_484.1820m/z	-0.0627938	0.0265034
1.41_180.1018m/z	0.0111615	-0.0671925
3.87_406.2068m/z	0.0327866	-0.0595286
3.92_338.1235m/z	-0.0568514	0.0366361
3.63_361.1135m/z	0.0481528	-0.0474882
9.59_941.4754m/z	0.0672515	0.000395948
10.93_423.3617m/z	0.0581014	-0.0337624
4.76_566.2484m/z	0.0541459	0.0394127
3.68_464.1567m/z	0.0306463	-0.059538
7.28_273.0756m/z	0.0668945	-0.00265946
8.18_471.3115m/z	0.066841	-0.00308929
11.72_472.3191n	-0.0338658	-0.0575544
9.48_637.4220m/z	0.0665178	0.00273713
4.45_520.1455m/z	-0.0420212	0.0515339
3.48_596.2335m/z	0.0195119	-0.0633648
3.77_492.1866m/z	0.0495254	-0.043983
13.12_421.3098m/z	-0.0104751	-0.0652964
4.46_406.1135m/z	0.0528166	0.0391584
6.52_521.2024m/z	-0.015535	0.0638711
3.71_453.1737m/z	0.0205472	-0.0622757
3.98_743.2016m/z	-0.0452937	0.0471226
3.98_873.2308m/z	-0.0454377	0.0468695
14.56_455.3527m/z	-0.0250776	-0.0600163
4.77_302.1234m/z	-0.0592549	0.0253166
7.76_795.4176m/z	-0.0103256	0.0634913
4.18_787.2292m/z	-0.0567632	0.0301651
12.36_435.2917m/z	-0.0287759	-0.0573952
5.29_499.3055m/z	0.0564105	0.0299803
4.94_712.3670n	-0.0286841	0.0567856
3.74_466.1867m/z	0.0608686	0.0179095
4.76_456.1863m/z	-0.0582037	0.0247083
3.94_494.1655m/z	0.00312763	-0.0630485
3.86_550.1905m/z	0.0307665	-0.0549585
8.11_809.4334m/z	0.0455361	-0.0432603
8.61_663.3749m/z	-0.061422	0.0127285
6.40_313.1432m/z	-0.00526406	0.0620131
3.79_480.1520m/z	0.0505618	-0.0357853
10.66_519.3321m/z	-0.0610092	-0.00448209
4.84_515.3003m/z	-0.0300795	0.0525725
3.74_494.1661m/z	0.00597691	-0.060229
12.36_453.2984m/z	-0.015766	-0.0583165
6.59_331.1540m/z	-0.0290952	0.0529398
8.08_913.4798m/z	0.0588266	-0.0133429
3.65_478.1707m/z	0.0344794	-0.0493063
3.78_187.0631n	0.0473172	-0.0371404
4.84_469.2951m/z	-0.0312141	0.0514164
5.28_609.1459m/z	-0.0454987	0.0392925
5.28_193.0504m/z	0.0513049	-0.030661
9.28_913.5157m/z	0.0407558	0.043148
10.27_521.3481m/z	-0.027783	0.0523904
6.40_540.2441m/z	0.00671123	0.0588014
10.66_501.3218m/z	-0.057495	-0.0128613
5.11_299.1134m/z	0.00916135	-0.058173
5.94_303.0497m/z	0.0387193	-0.0441608
5.95_273.0969m/z	0.039001	-0.0438102
3.28_259.1363m/z	0.0267261	0.0520157
10.76_487.3425m/z	0.0583319	-0.00103001
5.56_636.3536m/z	0.0419523	0.0400985
5.40_465.1031m/z	0.0132533	0.0556962
3.71_464.1893m/z	0.037588	-0.0430203
3.86_654.2395m/z	0.0057423	0.0558679
7.19_499.3056m/z	0.0519731	0.020567
3.55_418.1645m/z	-0.0120608	-0.0542293
7.19_471.3106m/z	0.0510902	0.0212858
4.35_757.2185m/z	-0.0462769	0.0301559
4.36_611.1610m/z	-0.0298511	0.0464054
4.69_755.2044m/z	0.0346782	0.042917
1.20_180.0663m/z	0.0548913	0.00379354
7.03_521.1663m/z	0.0405737	0.0370372
1.36_123.0439m/z	0.0542706	0.00715592
12.86_971.6611m/z	-0.0522785	-0.016039
7.19_535.3267m/z	0.051034	0.0196388
3.91_376.1364n	0.0459432	0.0296314
7.19_453.3003m/z	0.0497121	0.0217553
5.01_859.1246m/z	-0.0434166	0.0324226
3.57_496.1468m/z	0.0273316	-0.04643
4.69_281.1390m/z	-0.0171769	0.0509384
5.60_987.4804m/z	0.0525608	0.0110667
3.78_386.0779n	0.0301369	0.0444036
4.55_335.0769m/z	0.0422319	-0.0330968
4.37_771.1989m/z	0.0220509	0.0488055
0.65_333.0590m/z	0.0535192	0.00141377
5.61_640.2239m/z	-0.0100423	0.0523589
4.34_207.0650m/z	0.0041737	0.0531159
5.50_463.0878m/z	0.0116036	0.0519763
2.25_268.1040m/z	-0.0520451	0.0107229
6.60_506.2723n	0.0253868	-0.0465023
8.15_971.4852m/z	0.0489614	0.0200501
1.94_164.0705m/z	0.0323639	-0.0418118
5.19_301.0343m/z	-0.0347862	0.0391533
1.37_164.0471n	0.052245	0.00326734
5.19_449.1079m/z	-0.0294438	0.0431065
4.18_432.1267n	0.0135309	0.0500713
6.95_462.1759m/z	0.0473295	0.0211658
7.77_572.2482m/z	0.0397092	0.0332053
6.95_300.1229m/z	0.0472057	0.0211907
15.90_651.4585m/z	-0.0434059	0.0281019
4.36_355.1027m/z	0.0406086	0.0312549
5.32_537.1607m/z	0.0379758	0.0342456
4.18_127.0386m/z	0.0151136	0.0487983
6.55_461.1448m/z	0.0461412	-0.0208574
5.29_433.1132m/z	0.00989439	-0.0495681
7.03_623.1615m/z	-0.00826118	-0.0497459
5.02_739.1725m/z	-0.0432016	0.0250931
4.62_265.1431m/z	-0.0125968	0.0482802
4.37_175.0396m/z	0.0388288	0.0310632
7.77_649.3947m/z	0.0381365	0.030847
7.77_485.3261m/z	0.0291223	0.0392183
13.33_678.3830n	0.0265704	0.0404934
0.63_145.0616m/z	-0.0319975	-0.0352719
4.98_639.1928m/z	-0.0171021	0.0444183
0.68_245.0422m/z	0.0472248	-0.00379085
7.77_503.3367m/z	0.0337029	0.0324852
6.43_505.2644m/z	0.0331322	0.0318046
3.30_178.0862m/z	0.0276121	-0.0352045
5.19_611.1609m/z	-0.0235063	0.0379974
3.79_771.2323m/z	0.0234026	0.0379094
5.28_519.2958m/z	0.0164053	-0.0409027
4.40_385.1131m/z	0.0132173	0.0418514
5.28_565.3011m/z	0.0124709	-0.0409694
3.84_581.1504m/z	0.0411072	0.00473161
0.63_257.1026n	0.0314591	-0.0252898
3.89_517.1791m/z	0.0209729	-0.0344684
9.63_463.1835m/z	-0.0140857	0.0370998
4.21_522.2676n	0.0363424	0.00996523
7.52_491.1557m/z	-0.0314066	0.0201223
5.04_771.1990m/z	-0.0296396	0.021842
5.24_727.2085m/z	0.0268865	0.0246786
5.24_287.0548m/z	0.0244202	0.0262857
4.92_794.1007m/z	0.0295559	0.0173798
11.36_485.2925m/z	0.00888506	-0.0325954
5.19_607.1306m/z	0.0292428	0.016403
3.94_442.2079m/z	0.0328437	0.0017103
8.36_517.3165m/z	-0.0328598	-0.00059949
5.95_727.1871m/z	0.0326873	0.00123773
4.34_593.1511m/z	0.013938	-0.0286673
4.89_771.1985m/z	0.0266748	0.0158577
10.58_485.3261m/z	-0.0265306	-0.0152962
6.04_623.1614m/z	0.0275816	-0.0130753
4.27_595.1658m/z	0.0169412	-0.0245582
11.06_439.3558m/z	0.0131885	0.0257868
5.56_595.1661m/z	0.00066406	0.0274309
5.94_625.1769m/z	0.0267015	-0.000428574
5.93_479.1187m/z	0.0259684	-0.000739904
5.99_461.1449m/z	0.00678061	-0.0209956
3.94_771.1982m/z	-0.0117813	0.016595
10.38_899.5010m/z	0.0097404	0.015236
10.38_587.3947m/z	0.00942069	0.0153791
3.93_428.1919m/z	-0.0158576	-0.007769
15.35_425.3769m/z	0.0139813	-0.0106923
4.05_288.0868m/z	0.017162	-0.00023622
6.62_533.3119m/z	0.0156628	0.00529918
10.43_324.1054n	0.0106539	0.0124653
10.58_643.2804m/z	-0.0138486	-0.00874227
5.88_463.1596m/z	0.0126055	-0.00378775
