# Supplementary material for: Integrative Metabolomic and Transcriptomic Landscape during Akebia trifoliata Fruit Ripening and Cracking
Source: Int J Mol Sci. 2023 Nov 24;24(23):16732. doi: 10.3390/ijms242316732 (PMC10706055; doi:10.3390/ijms242316732)
Supplement: Supplementary file 1 [file ijms-24-16732-s001.zip › Table S7.xlsx]

## Sheet: all.cor_pvalue.list
Var1	Var2	cor	p_value
10.83_945.7187m/z	TR5679_c1_g2	-0.558717	0.0589871
10.84_929.5126m/z	TR5679_c1_g2	-0.561575	0.0574275
13.83_703.2256m/z	TR5679_c1_g2	0.438363	0.154026
13.83_719.2211m/z	TR5679_c1_g2	0.41861	0.175622
13.83_721.2324m/z	TR5679_c1_g2	0.453401	0.138777
14.16_409.1882m/z	TR5679_c1_g2	0.980765	2.00796e-08
14.26_243.2106m/z	TR5679_c1_g2	0.916722	2.73931e-05
14.26_261.2211m/z	TR5679_c1_g2	0.918899	2.40857e-05
14.26_335.2582m/z	TR5679_c1_g2	0.924692	1.6794e-05
14.26_349.1982m/z	TR5679_c1_g2	0.896968	7.67431e-05
14.26_353.2683m/z	TR5679_c1_g2	0.919105	2.37891e-05
14.60_263.2367m/z	TR5679_c1_g2	0.959904	7.62973e-07
14.60_355.2832m/z	TR5679_c1_g2	0.958848	8.67344e-07
14.70_245.2261m/z	TR5679_c1_g2	0.919189	2.36691e-05
14.70_337.2735m/z	TR5679_c1_g2	0.919714	2.2932e-05
14.70_354.2764n	TR5679_c1_g2	0.906342	4.84126e-05
14.70_653.2608m/z	TR5679_c1_g2	0.749652	0.00499604
14.71_309.1671m/z	TR5679_c1_g2	0.922423	1.9405e-05
15.11_429.1946m/z	TR5679_c1_g2	0.966755	3.02453e-07
15.37_365.2684m/z	TR5679_c1_g2	0.934795	8.31502e-06
15.42_293.2473m/z	TR5679_c1_g2	0.97429	8.47323e-08
15.46_713.2560m/z	TR5679_c1_g2	0.519367	0.0835428
15.58_567.4195m/z	TR5679_c1_g2	0.428703	0.164364
15.75_295.2630m/z	TR5679_c1_g2	0.971737	1.35448e-07
4.57_323.1246m/z	TR5679_c1_g2	0.972056	1.28036e-07
0.66_199.0009m/z	TR5679_c1_g2	0.879916	0.000160221
0.77_606.0743m/z	TR5679_c1_g2	0.407603	0.188437
0.94_129.0192m/z	TR5679_c1_g2	0.856873	0.000370119
0.95_130.9984m/z	TR5679_c1_g2	0.844354	0.000550582
0.95_87.0086m/z	TR5679_c1_g2	0.879141	0.000165235
1.12_111.0086m/z	TR5679_c1_g2	0.829991	0.000834484
13.35_689.2099m/z	TR5679_c1_g2	0.383257	0.218786
15.00_609.2711m/z	TR5679_c1_g2	0.321967	0.307452
15.07_357.2992m/z	TR5679_c1_g2	0.883488	0.00013863
15.17_265.2524m/z	TR5679_c1_g2	0.886434	0.000122594
15.18_273.1307m/z	TR5679_c1_g2	0.634946	0.026537
15.20_827.4928m/z	TR5679_c1_g2	0.415091	0.179658
15.41_671.2710m/z	TR5679_c1_g2	0.552304	0.0625941
15.41_683.2455m/z	TR5679_c1_g2	0.552002	0.0627673
15.76_652.2898n	TR5679_c1_g2	0.312921	0.322006
18.08_546.3906n	TR5679_c1_g2	-0.900411	6.51351e-05
3.73_482.1745m/z	TR5679_c1_g2	0.876224	0.000185214
3.79_448.1942m/z	TR5679_c1_g2	0.866555	0.000265245
4.10_229.0858m/z	TR5679_c1_g2	0.855979	0.000381226
4.16_257.1382m/z	TR5679_c1_g2	-0.891423	9.87855e-05
4.16_441.1731m/z	TR5679_c1_g2	-0.8939	8.83973e-05
4.43_281.1029m/z	TR5679_c1_g2	0.754809	0.0045451
5.20_553.1925m/z	TR5679_c1_g2	-0.214716	0.50276
6.05_501.3218m/z	TR5679_c1_g2	-0.357193	0.254353
6.80_599.1983m/z	TR5679_c1_g2	-0.362358	0.247053
10.83_945.7187m/z	TR18759_c0_g1	-0.370525	0.235763
10.84_929.5126m/z	TR18759_c0_g1	-0.367171	0.240362
13.83_703.2256m/z	TR18759_c0_g1	0.237549	0.457216
13.83_719.2211m/z	TR18759_c0_g1	0.227479	0.477059
13.83_721.2324m/z	TR18759_c0_g1	0.261054	0.412472
14.16_409.1882m/z	TR18759_c0_g1	0.946574	3.13301e-06
14.26_243.2106m/z	TR18759_c0_g1	0.853579	0.00041231
14.26_261.2211m/z	TR18759_c0_g1	0.856595	0.000373547
14.26_335.2582m/z	TR18759_c0_g1	0.864664	0.000283631
14.26_349.1982m/z	TR18759_c0_g1	0.832005	0.000789027
14.26_353.2683m/z	TR18759_c0_g1	0.85948	0.000339171
14.60_263.2367m/z	TR18759_c0_g1	0.957056	1.07008e-06
14.60_355.2832m/z	TR18759_c0_g1	0.95412	1.48211e-06
14.70_245.2261m/z	TR18759_c0_g1	0.903871	5.49092e-05
14.70_337.2735m/z	TR18759_c0_g1	0.898591	7.10859e-05
14.70_354.2764n	TR18759_c0_g1	0.880836	0.000154421
14.70_653.2608m/z	TR18759_c0_g1	0.591583	0.0427489
14.71_309.1671m/z	TR18759_c0_g1	0.909216	4.16329e-05
15.11_429.1946m/z	TR18759_c0_g1	0.917787	2.57328e-05
15.37_365.2684m/z	TR18759_c0_g1	0.915086	3.01072e-05
15.42_293.2473m/z	TR18759_c0_g1	0.927244	1.41966e-05
15.46_713.2560m/z	TR18759_c0_g1	0.326799	0.29983
15.58_567.4195m/z	TR18759_c0_g1	0.220226	0.491589
15.75_295.2630m/z	TR18759_c0_g1	0.958034	9.55227e-07
4.57_323.1246m/z	TR18759_c0_g1	0.962553	5.44554e-07
0.66_199.0009m/z	TR18759_c0_g1	0.892045	9.60917e-05
0.77_606.0743m/z	TR18759_c0_g1	0.240654	0.451179
0.94_129.0192m/z	TR18759_c0_g1	0.789442	0.00226097
0.95_130.9984m/z	TR18759_c0_g1	0.821219	0.00105649
0.95_87.0086m/z	TR18759_c0_g1	0.83394	0.00074719
1.12_111.0086m/z	TR18759_c0_g1	0.764616	0.00377317
13.35_689.2099m/z	TR18759_c0_g1	0.184413	0.56613
15.00_609.2711m/z	TR18759_c0_g1	0.124591	0.699648
15.07_357.2992m/z	TR18759_c0_g1	0.852699	0.000424194
15.17_265.2524m/z	TR18759_c0_g1	0.856012	0.000380809
15.18_273.1307m/z	TR18759_c0_g1	0.484102	0.110764
15.20_827.4928m/z	TR18759_c0_g1	0.217894	0.496304
15.41_671.2710m/z	TR18759_c0_g1	0.377003	0.22703
15.41_683.2455m/z	TR18759_c0_g1	0.374482	0.230405
15.76_652.2898n	TR18759_c0_g1	0.105369	0.744494
18.08_546.3906n	TR18759_c0_g1	-0.870789	0.000227433
3.73_482.1745m/z	TR18759_c0_g1	0.780861	0.00271818
3.79_448.1942m/z	TR18759_c0_g1	0.89062	0.000102347
4.10_229.0858m/z	TR18759_c0_g1	0.871781	0.000219216
4.16_257.1382m/z	TR18759_c0_g1	-0.85585	0.000382854
4.16_441.1731m/z	TR18759_c0_g1	-0.86097	0.000322411
4.43_281.1029m/z	TR18759_c0_g1	0.820712	0.0010706
5.20_553.1925m/z	TR18759_c0_g1	-0.399598	0.19811
6.05_501.3218m/z	TR18759_c0_g1	-0.542001	0.0687036
6.80_599.1983m/z	TR18759_c0_g1	-0.162107	0.614715
10.83_945.7187m/z	TR9419_c0_g1	0.633913	0.026861
10.84_929.5126m/z	TR9419_c0_g1	0.630271	0.028026
13.83_703.2256m/z	TR9419_c0_g1	-0.524638	0.0799092
13.83_719.2211m/z	TR9419_c0_g1	-0.517417	0.0849152
13.83_721.2324m/z	TR9419_c0_g1	-0.550346	0.0637249
14.16_409.1882m/z	TR9419_c0_g1	-0.987051	2.80532e-09
14.26_243.2106m/z	TR9419_c0_g1	-0.92877	1.28024e-05
14.26_261.2211m/z	TR9419_c0_g1	-0.931002	1.09602e-05
14.26_335.2582m/z	TR9419_c0_g1	-0.936351	7.38901e-06
14.26_349.1982m/z	TR9419_c0_g1	-0.895663	8.15434e-05
14.26_353.2683m/z	TR9419_c0_g1	-0.928236	1.32778e-05
14.60_263.2367m/z	TR9419_c0_g1	-0.961119	6.55503e-07
14.60_355.2832m/z	TR9419_c0_g1	-0.961085	6.58333e-07
14.70_245.2261m/z	TR9419_c0_g1	-0.914626	3.09063e-05
14.70_337.2735m/z	TR9419_c0_g1	-0.916321	2.80406e-05
14.70_354.2764n	TR9419_c0_g1	-0.907285	4.60967e-05
14.70_653.2608m/z	TR9419_c0_g1	-0.814816	0.00124537
14.71_309.1671m/z	TR9419_c0_g1	-0.908583	4.30558e-05
15.11_429.1946m/z	TR9419_c0_g1	-0.964227	4.34491e-07
15.37_365.2684m/z	TR9419_c0_g1	-0.915381	2.96022e-05
15.42_293.2473m/z	TR9419_c0_g1	-0.978709	3.325e-08
15.46_713.2560m/z	TR9419_c0_g1	-0.595186	0.0411864
15.58_567.4195m/z	TR9419_c0_g1	-0.507861	0.0918616
15.75_295.2630m/z	TR9419_c0_g1	-0.971425	1.43021e-07
4.57_323.1246m/z	TR9419_c0_g1	-0.933113	9.41723e-06
0.66_199.0009m/z	TR9419_c0_g1	-0.879478	0.000163035
0.77_606.0743m/z	TR9419_c0_g1	-0.506318	0.0930174
0.94_129.0192m/z	TR9419_c0_g1	-0.862949	0.000301154
0.95_130.9984m/z	TR9419_c0_g1	-0.848284	0.000487881
0.95_87.0086m/z	TR9419_c0_g1	-0.875424	0.00019101
1.12_111.0086m/z	TR9419_c0_g1	-0.834423	0.000737012
13.35_689.2099m/z	TR9419_c0_g1	-0.47791	0.116083
15.00_609.2711m/z	TR9419_c0_g1	-0.424153	0.16938
15.07_357.2992m/z	TR9419_c0_g1	-0.872417	0.000214068
15.17_265.2524m/z	TR9419_c0_g1	-0.87867	0.000168342
15.18_273.1307m/z	TR9419_c0_g1	-0.713302	0.00919965
15.20_827.4928m/z	TR9419_c0_g1	-0.501784	0.0964718
15.41_671.2710m/z	TR9419_c0_g1	-0.643807	0.0238725
15.41_683.2455m/z	TR9419_c0_g1	-0.634878	0.0265581
15.76_652.2898n	TR9419_c0_g1	-0.407902	0.188081
18.08_546.3906n	TR9419_c0_g1	0.896246	7.93712e-05
3.73_482.1745m/z	TR9419_c0_g1	-0.904803	5.2382e-05
3.79_448.1942m/z	TR9419_c0_g1	-0.840887	0.000610936
4.10_229.0858m/z	TR9419_c0_g1	-0.826493	0.000918178
4.16_257.1382m/z	TR9419_c0_g1	0.925429	1.6008e-05
4.16_441.1731m/z	TR9419_c0_g1	0.884365	0.000133695
4.43_281.1029m/z	TR9419_c0_g1	-0.702794	0.0107993
5.20_553.1925m/z	TR9419_c0_g1	0.122504	0.704477
6.05_501.3218m/z	TR9419_c0_g1	0.267438	0.400711
6.80_599.1983m/z	TR9419_c0_g1	0.415186	0.179548
10.83_945.7187m/z	TR16147_c0_g1	-0.38322	0.218835
10.84_929.5126m/z	TR16147_c0_g1	-0.380906	0.221864
13.83_703.2256m/z	TR16147_c0_g1	0.250119	0.43301
13.83_719.2211m/z	TR16147_c0_g1	0.222399	0.487215
13.83_721.2324m/z	TR16147_c0_g1	0.266354	0.402697
14.16_409.1882m/z	TR16147_c0_g1	0.936962	7.04841e-06
14.26_243.2106m/z	TR16147_c0_g1	0.827185	0.00090114
14.26_261.2211m/z	TR16147_c0_g1	0.833215	0.000762663
14.26_335.2582m/z	TR16147_c0_g1	0.841438	0.000601021
14.26_349.1982m/z	TR16147_c0_g1	0.816715	0.00118684
14.26_353.2683m/z	TR16147_c0_g1	0.838094	0.000663179
14.60_263.2367m/z	TR16147_c0_g1	0.940425	5.34489e-06
14.60_355.2832m/z	TR16147_c0_g1	0.949292	2.42425e-06
14.70_245.2261m/z	TR16147_c0_g1	0.889496	0.000107506
14.70_337.2735m/z	TR16147_c0_g1	0.886805	0.000120684
14.70_354.2764n	TR16147_c0_g1	0.864207	0.000288221
14.70_653.2608m/z	TR16147_c0_g1	0.613581	0.033836
14.71_309.1671m/z	TR16147_c0_g1	0.896663	7.78452e-05
15.11_429.1946m/z	TR16147_c0_g1	0.936164	7.49526e-06
15.37_365.2684m/z	TR16147_c0_g1	0.869565	0.000237904
15.42_293.2473m/z	TR16147_c0_g1	0.917949	2.54886e-05
15.46_713.2560m/z	TR16147_c0_g1	0.342813	0.275335
15.58_567.4195m/z	TR16147_c0_g1	0.249274	0.434616
15.75_295.2630m/z	TR16147_c0_g1	0.95062	2.12785e-06
4.57_323.1246m/z	TR16147_c0_g1	0.951027	2.04297e-06
0.66_199.0009m/z	TR16147_c0_g1	0.892957	9.22468e-05
0.77_606.0743m/z	TR16147_c0_g1	0.217934	0.496222
0.94_129.0192m/z	TR16147_c0_g1	0.763494	0.00385602
0.95_130.9984m/z	TR16147_c0_g1	0.770479	0.00336187
0.95_87.0086m/z	TR16147_c0_g1	0.803501	0.00164157
1.12_111.0086m/z	TR16147_c0_g1	0.745042	0.00542702
13.35_689.2099m/z	TR16147_c0_g1	0.186337	0.562013
15.00_609.2711m/z	TR16147_c0_g1	0.154083	0.632561
15.07_357.2992m/z	TR16147_c0_g1	0.888994	0.000109874
15.17_265.2524m/z	TR16147_c0_g1	0.88175	0.000148825
15.18_273.1307m/z	TR16147_c0_g1	0.488822	0.10682
15.20_827.4928m/z	TR16147_c0_g1	0.218338	0.495405
15.41_671.2710m/z	TR16147_c0_g1	0.399282	0.198498
15.41_683.2455m/z	TR16147_c0_g1	0.407603	0.188437
15.76_652.2898n	TR16147_c0_g1	0.128171	0.691387
18.08_546.3906n	TR16147_c0_g1	-0.843554	0.000564085
3.73_482.1745m/z	TR16147_c0_g1	0.84347	0.000565502
3.79_448.1942m/z	TR16147_c0_g1	0.833183	0.000763341
4.10_229.0858m/z	TR16147_c0_g1	0.90301	5.73275e-05
4.16_257.1382m/z	TR16147_c0_g1	-0.865285	0.000277489
4.16_441.1731m/z	TR16147_c0_g1	-0.904219	5.3954e-05
4.43_281.1029m/z	TR16147_c0_g1	0.846158	0.00052106
5.20_553.1925m/z	TR16147_c0_g1	-0.399093	0.198731
6.05_501.3218m/z	TR16147_c0_g1	-0.54018	0.0698246
6.80_599.1983m/z	TR16147_c0_g1	-0.173347	0.590041
10.83_945.7187m/z	TR11359_c0_g1	-0.604927	0.0371662
10.84_929.5126m/z	TR11359_c0_g1	-0.606699	0.0364658
13.83_703.2256m/z	TR11359_c0_g1	0.493629	0.1029
13.83_719.2211m/z	TR11359_c0_g1	0.477952	0.116046
13.83_721.2324m/z	TR11359_c0_g1	0.513289	0.0878703
14.16_409.1882m/z	TR11359_c0_g1	0.981533	1.64005e-08
14.26_243.2106m/z	TR11359_c0_g1	0.926901	1.4526e-05
14.26_261.2211m/z	TR11359_c0_g1	0.928828	1.27518e-05
14.26_335.2582m/z	TR11359_c0_g1	0.932329	9.96889e-06
14.26_349.1982m/z	TR11359_c0_g1	0.907962	4.44902e-05
14.26_353.2683m/z	TR11359_c0_g1	0.926989	1.4441e-05
14.60_263.2367m/z	TR11359_c0_g1	0.949177	2.45129e-06
14.60_355.2832m/z	TR11359_c0_g1	0.945772	3.37053e-06
14.70_245.2261m/z	TR11359_c0_g1	0.909004	4.21059e-05
14.70_337.2735m/z	TR11359_c0_g1	0.909773	4.04091e-05
14.70_354.2764n	TR11359_c0_g1	0.896243	7.93828e-05
14.70_653.2608m/z	TR11359_c0_g1	0.786833	0.0023932
14.71_309.1671m/z	TR11359_c0_g1	0.915212	2.98911e-05
15.11_429.1946m/z	TR11359_c0_g1	0.959357	8.15671e-07
15.37_365.2684m/z	TR11359_c0_g1	0.941023	5.08722e-06
15.42_293.2473m/z	TR11359_c0_g1	0.982222	1.35736e-08
15.46_713.2560m/z	TR11359_c0_g1	0.565614	0.0552725
15.58_567.4195m/z	TR11359_c0_g1	0.478091	0.115925
15.75_295.2630m/z	TR11359_c0_g1	0.967312	2.78205e-07
4.57_323.1246m/z	TR11359_c0_g1	0.959441	8.07467e-07
0.66_199.0009m/z	TR11359_c0_g1	0.880947	0.000153732
0.77_606.0743m/z	TR11359_c0_g1	0.470978	0.122234
0.94_129.0192m/z	TR11359_c0_g1	0.88129	0.000151626
0.95_130.9984m/z	TR11359_c0_g1	0.867418	0.000257163
0.95_87.0086m/z	TR11359_c0_g1	0.896566	7.81978e-05
1.12_111.0086m/z	TR11359_c0_g1	0.854144	0.000404827
13.35_689.2099m/z	TR11359_c0_g1	0.436791	0.15568
15.00_609.2711m/z	TR11359_c0_g1	0.373491	0.23174
15.07_357.2992m/z	TR11359_c0_g1	0.859641	0.000337326
15.17_265.2524m/z	TR11359_c0_g1	0.866326	0.000267423
15.18_273.1307m/z	TR11359_c0_g1	0.686958	0.0135887
15.20_827.4928m/z	TR11359_c0_g1	0.467857	0.125071
15.41_671.2710m/z	TR11359_c0_g1	0.589768	0.0435518
15.41_683.2455m/z	TR11359_c0_g1	0.588095	0.044301
15.76_652.2898n	TR11359_c0_g1	0.366628	0.241112
18.08_546.3906n	TR11359_c0_g1	-0.899508	6.80361e-05
3.73_482.1745m/z	TR11359_c0_g1	0.88109	0.000152851
3.79_448.1942m/z	TR11359_c0_g1	0.869272	0.00024046
4.10_229.0858m/z	TR11359_c0_g1	0.824653	0.00096474
4.16_257.1382m/z	TR11359_c0_g1	-0.909698	4.05724e-05
4.16_441.1731m/z	TR11359_c0_g1	-0.894913	8.44054e-05
4.43_281.1029m/z	TR11359_c0_g1	0.709871	0.00970101
5.20_553.1925m/z	TR11359_c0_g1	-0.153088	0.634787
6.05_501.3218m/z	TR11359_c0_g1	-0.301867	0.340295
6.80_599.1983m/z	TR11359_c0_g1	-0.407994	0.187972
10.83_945.7187m/z	TR12088_c0_g1	-0.555368	0.0608523
10.84_929.5126m/z	TR12088_c0_g1	-0.561159	0.0576528
13.83_703.2256m/z	TR12088_c0_g1	0.433063	0.159645
13.83_719.2211m/z	TR12088_c0_g1	0.415056	0.179698
13.83_721.2324m/z	TR12088_c0_g1	0.446576	0.145571
14.16_409.1882m/z	TR12088_c0_g1	0.979966	2.45758e-08
14.26_243.2106m/z	TR12088_c0_g1	0.909271	4.15093e-05
14.26_261.2211m/z	TR12088_c0_g1	0.912756	3.43329e-05
14.26_335.2582m/z	TR12088_c0_g1	0.91961	2.30757e-05
14.26_349.1982m/z	TR12088_c0_g1	0.874603	0.000197106
14.26_353.2683m/z	TR12088_c0_g1	0.912687	3.4465e-05
14.60_263.2367m/z	TR12088_c0_g1	0.970842	1.58048e-07
14.60_355.2832m/z	TR12088_c0_g1	0.974193	8.6338e-08
14.70_245.2261m/z	TR12088_c0_g1	0.926688	1.47333e-05
14.70_337.2735m/z	TR12088_c0_g1	0.926775	1.46488e-05
14.70_354.2764n	TR12088_c0_g1	0.915316	2.97132e-05
14.70_653.2608m/z	TR12088_c0_g1	0.747901	0.00515658
14.71_309.1671m/z	TR12088_c0_g1	0.916715	2.74055e-05
15.11_429.1946m/z	TR12088_c0_g1	0.969392	2.00986e-07
15.37_365.2684m/z	TR12088_c0_g1	0.912766	3.4314e-05
15.42_293.2473m/z	TR12088_c0_g1	0.961689	6.09438e-07
15.46_713.2560m/z	TR12088_c0_g1	0.520011	0.0830933
15.58_567.4195m/z	TR12088_c0_g1	0.424384	0.169124
15.75_295.2630m/z	TR12088_c0_g1	0.973232	1.03481e-07
4.57_323.1246m/z	TR12088_c0_g1	0.964862	3.97691e-07
0.66_199.0009m/z	TR12088_c0_g1	0.87333	0.000206847
0.77_606.0743m/z	TR12088_c0_g1	0.404024	0.192725
0.94_129.0192m/z	TR12088_c0_g1	0.839727	0.00063222
0.95_130.9984m/z	TR12088_c0_g1	0.824301	0.000973863
0.95_87.0086m/z	TR12088_c0_g1	0.86231	0.000307893
1.12_111.0086m/z	TR12088_c0_g1	0.808105	0.00147017
13.35_689.2099m/z	TR12088_c0_g1	0.386387	0.214729
15.00_609.2711m/z	TR12088_c0_g1	0.3297	0.295305
15.07_357.2992m/z	TR12088_c0_g1	0.910308	3.92611e-05
15.17_265.2524m/z	TR12088_c0_g1	0.908034	4.4323e-05
15.18_273.1307m/z	TR12088_c0_g1	0.627095	0.0290715
15.20_827.4928m/z	TR12088_c0_g1	0.414558	0.180274
15.41_671.2710m/z	TR12088_c0_g1	0.570828	0.0525751
15.41_683.2455m/z	TR12088_c0_g1	0.565427	0.0553707
15.76_652.2898n	TR12088_c0_g1	0.314698	0.319119
18.08_546.3906n	TR12088_c0_g1	-0.901103	6.29809e-05
3.73_482.1745m/z	TR12088_c0_g1	0.882292	0.000145584
3.79_448.1942m/z	TR12088_c0_g1	0.851204	0.000444989
4.10_229.0858m/z	TR12088_c0_g1	0.862514	0.000305734
4.16_257.1382m/z	TR12088_c0_g1	-0.893461	9.01747e-05
4.16_441.1731m/z	TR12088_c0_g1	-0.892937	9.23273e-05
4.43_281.1029m/z	TR12088_c0_g1	0.762948	0.00389686
5.20_553.1925m/z	TR12088_c0_g1	-0.216957	0.498203
6.05_501.3218m/z	TR12088_c0_g1	-0.355889	0.256216
6.80_599.1983m/z	TR12088_c0_g1	-0.350216	0.264413
10.83_945.7187m/z	TR12978_c1_g1	-0.557554	0.0596301
10.84_929.5126m/z	TR12978_c1_g1	-0.55718	0.0598383
13.83_703.2256m/z	TR12978_c1_g1	0.426135	0.167184
13.83_719.2211m/z	TR12978_c1_g1	0.410218	0.185341
13.83_721.2324m/z	TR12978_c1_g1	0.442705	0.149519
14.16_409.1882m/z	TR12978_c1_g1	0.98456	6.73331e-09
14.26_243.2106m/z	TR12978_c1_g1	0.919399	2.33729e-05
14.26_261.2211m/z	TR12978_c1_g1	0.921461	2.06046e-05
14.26_335.2582m/z	TR12978_c1_g1	0.927297	1.41467e-05
14.26_349.1982m/z	TR12978_c1_g1	0.886118	0.000124241
14.26_353.2683m/z	TR12978_c1_g1	0.921458	2.0609e-05
14.60_263.2367m/z	TR12978_c1_g1	0.974129	8.74028e-08
14.60_355.2832m/z	TR12978_c1_g1	0.97362	9.62551e-08
14.70_245.2261m/z	TR12978_c1_g1	0.932043	1.01761e-05
14.70_337.2735m/z	TR12978_c1_g1	0.931988	1.02165e-05
14.70_354.2764n	TR12978_c1_g1	0.921992	1.9936e-05
14.70_653.2608m/z	TR12978_c1_g1	0.740653	0.00586285
14.71_309.1671m/z	TR12978_c1_g1	0.923832	1.77483e-05
15.11_429.1946m/z	TR12978_c1_g1	0.967221	2.82083e-07
15.37_365.2684m/z	TR12978_c1_g1	0.920994	2.12075e-05
15.42_293.2473m/z	TR12978_c1_g1	0.968314	2.38508e-07
15.46_713.2560m/z	TR12978_c1_g1	0.509512	0.0906346
15.58_567.4195m/z	TR12978_c1_g1	0.417131	0.177311
15.75_295.2630m/z	TR12978_c1_g1	0.976401	5.54122e-08
4.57_323.1246m/z	TR12978_c1_g1	0.964663	4.08904e-07
0.66_199.0009m/z	TR12978_c1_g1	0.875011	0.000194053
0.77_606.0743m/z	TR12978_c1_g1	0.400479	0.197031
0.94_129.0192m/z	TR12978_c1_g1	0.842345	0.000584956
0.95_130.9984m/z	TR12978_c1_g1	0.831757	0.000794527
0.95_87.0086m/z	TR12978_c1_g1	0.866026	0.000270287
1.12_111.0086m/z	TR12978_c1_g1	0.81254	0.00131843
13.35_689.2099m/z	TR12978_c1_g1	0.379372	0.223886
15.00_609.2711m/z	TR12978_c1_g1	0.314314	0.319742
15.07_357.2992m/z	TR12978_c1_g1	0.898305	7.20573e-05
15.17_265.2524m/z	TR12978_c1_g1	0.898055	7.2915e-05
15.18_273.1307m/z	TR12978_c1_g1	0.621219	0.0310795
15.20_827.4928m/z	TR12978_c1_g1	0.409457	0.186239
15.41_671.2710m/z	TR12978_c1_g1	0.558081	0.0593383
15.41_683.2455m/z	TR12978_c1_g1	0.550346	0.0637249
15.76_652.2898n	TR12978_c1_g1	0.304513	0.335868
18.08_546.3906n	TR12978_c1_g1	-0.899587	6.77791e-05
3.73_482.1745m/z	TR12978_c1_g1	0.873505	0.000205492
3.79_448.1942m/z	TR12978_c1_g1	0.861347	0.000318275
4.10_229.0858m/z	TR12978_c1_g1	0.86793	0.000252467
4.16_257.1382m/z	TR12978_c1_g1	-0.8849	0.000130747
4.16_441.1731m/z	TR12978_c1_g1	-0.881344	0.000151293
4.43_281.1029m/z	TR12978_c1_g1	0.769066	0.00345774
5.20_553.1925m/z	TR12978_c1_g1	-0.225857	0.48029
6.05_501.3218m/z	TR12978_c1_g1	-0.36242	0.246966
6.80_599.1983m/z	TR12978_c1_g1	-0.354664	0.257973
10.83_945.7187m/z	TR1515_c0_g2	-0.630158	0.0280627
10.84_929.5126m/z	TR1515_c0_g2	-0.635044	0.0265062
13.83_703.2256m/z	TR1515_c0_g2	0.521031	0.0823838
13.83_719.2211m/z	TR1515_c0_g2	0.506312	0.093022
13.83_721.2324m/z	TR1515_c0_g2	0.538118	0.0711092
14.16_409.1882m/z	TR1515_c0_g2	0.986319	3.68931e-09
14.26_243.2106m/z	TR1515_c0_g2	0.933678	9.03465e-06
14.26_261.2211m/z	TR1515_c0_g2	0.935524	7.87001e-06
14.26_335.2582m/z	TR1515_c0_g2	0.941228	5.00113e-06
14.26_349.1982m/z	TR1515_c0_g2	0.902139	5.98561e-05
14.26_353.2683m/z	TR1515_c0_g2	0.933932	8.86691e-06
14.60_263.2367m/z	TR1515_c0_g2	0.961418	6.31057e-07
14.60_355.2832m/z	TR1515_c0_g2	0.960808	6.81815e-07
14.70_245.2261m/z	TR1515_c0_g2	0.92149	2.0567e-05
14.70_337.2735m/z	TR1515_c0_g2	0.923478	1.81541e-05
14.70_354.2764n	TR1515_c0_g2	0.913621	3.27124e-05
14.70_653.2608m/z	TR1515_c0_g2	0.809052	0.00143669
14.71_309.1671m/z	TR1515_c0_g2	0.916291	2.80885e-05
15.11_429.1946m/z	TR1515_c0_g2	0.972374	1.20979e-07
15.37_365.2684m/z	TR1515_c0_g2	0.923602	1.80111e-05
15.42_293.2473m/z	TR1515_c0_g2	0.97804	3.87633e-08
15.46_713.2560m/z	TR1515_c0_g2	0.59732	0.0402806
15.58_567.4195m/z	TR1515_c0_g2	0.510134	0.0901754
15.75_295.2630m/z	TR1515_c0_g2	0.971239	1.47694e-07
4.57_323.1246m/z	TR1515_c0_g2	0.953089	1.65331e-06
0.66_199.0009m/z	TR1515_c0_g2	0.869602	0.000237574
0.77_606.0743m/z	TR1515_c0_g2	0.494018	0.102587
0.94_129.0192m/z	TR1515_c0_g2	0.867704	0.000254527
0.95_130.9984m/z	TR1515_c0_g2	0.842672	0.000579255
0.95_87.0086m/z	TR1515_c0_g2	0.879362	0.000163791
1.12_111.0086m/z	TR1515_c0_g2	0.833565	0.000755153
13.35_689.2099m/z	TR1515_c0_g2	0.474052	0.119481
15.00_609.2711m/z	TR1515_c0_g2	0.413639	0.181339
15.07_357.2992m/z	TR1515_c0_g2	0.89073	0.000101854
15.17_265.2524m/z	TR1515_c0_g2	0.894677	8.53243e-05
15.18_273.1307m/z	TR1515_c0_g2	0.694188	0.0122562
15.20_827.4928m/z	TR1515_c0_g2	0.501708	0.0965306
15.41_671.2710m/z	TR1515_c0_g2	0.63582	0.026265
15.41_683.2455m/z	TR1515_c0_g2	0.628314	0.028667
15.76_652.2898n	TR1515_c0_g2	0.403524	0.193328
18.08_546.3906n	TR1515_c0_g2	-0.901691	6.11913e-05
3.73_482.1745m/z	TR1515_c0_g2	0.901695	6.11792e-05
3.79_448.1942m/z	TR1515_c0_g2	0.842647	0.000579694
4.10_229.0858m/z	TR1515_c0_g2	0.831541	0.000799321
4.16_257.1382m/z	TR1515_c0_g2	-0.907903	4.4629e-05
4.16_441.1731m/z	TR1515_c0_g2	-0.892176	9.55286e-05
4.43_281.1029m/z	TR1515_c0_g2	0.709926	0.00969288
5.20_553.1925m/z	TR1515_c0_g2	-0.126182	0.695972
6.05_501.3218m/z	TR1515_c0_g2	-0.268893	0.398055
6.80_599.1983m/z	TR1515_c0_g2	-0.423572	0.170028
10.83_945.7187m/z	TR16424_c0_g1	-0.53429	0.0735373
10.84_929.5126m/z	TR16424_c0_g1	-0.518914	0.0838606
13.83_703.2256m/z	TR16424_c0_g1	0.409775	0.185864
13.83_719.2211m/z	TR16424_c0_g1	0.40557	0.190865
13.83_721.2324m/z	TR16424_c0_g1	0.435994	0.156522
14.16_409.1882m/z	TR16424_c0_g1	0.975334	6.89944e-08
14.26_243.2106m/z	TR16424_c0_g1	0.910759	3.83151e-05
14.26_261.2211m/z	TR16424_c0_g1	0.914225	3.16189e-05
14.26_335.2582m/z	TR16424_c0_g1	0.923375	1.82737e-05
14.26_349.1982m/z	TR16424_c0_g1	0.880877	0.000154167
14.26_353.2683m/z	TR16424_c0_g1	0.913305	3.32974e-05
14.60_263.2367m/z	TR16424_c0_g1	0.957837	9.77524e-07
14.60_355.2832m/z	TR16424_c0_g1	0.950209	2.21619e-06
14.70_245.2261m/z	TR16424_c0_g1	0.909004	4.2104e-05
14.70_337.2735m/z	TR16424_c0_g1	0.907498	4.55872e-05
14.70_354.2764n	TR16424_c0_g1	0.891274	9.94358e-05
14.70_653.2608m/z	TR16424_c0_g1	0.719528	0.00833945
14.71_309.1671m/z	TR16424_c0_g1	0.91018	3.95328e-05
15.11_429.1946m/z	TR16424_c0_g1	0.932301	9.98919e-06
15.37_365.2684m/z	TR16424_c0_g1	0.933363	9.24653e-06
15.42_293.2473m/z	TR16424_c0_g1	0.967097	2.87375e-07
15.46_713.2560m/z	TR16424_c0_g1	0.482678	0.111973
15.58_567.4195m/z	TR16424_c0_g1	0.390131	0.209937
15.75_295.2630m/z	TR16424_c0_g1	0.965748	3.50537e-07
4.57_323.1246m/z	TR16424_c0_g1	0.945479	3.46105e-06
0.66_199.0009m/z	TR16424_c0_g1	0.920588	2.17428e-05
0.77_606.0743m/z	TR16424_c0_g1	0.43415	0.158482
0.94_129.0192m/z	TR16424_c0_g1	0.86877	0.000244893
0.95_130.9984m/z	TR16424_c0_g1	0.878416	0.000170033
0.95_87.0086m/z	TR16424_c0_g1	0.892634	9.35923e-05
1.12_111.0086m/z	TR16424_c0_g1	0.837678	0.000671233
13.35_689.2099m/z	TR16424_c0_g1	0.360636	0.249473
15.00_609.2711m/z	TR16424_c0_g1	0.302695	0.338907
15.07_357.2992m/z	TR16424_c0_g1	0.838842	0.00064885
15.17_265.2524m/z	TR16424_c0_g1	0.848339	0.000487043
15.18_273.1307m/z	TR16424_c0_g1	0.630041	0.028101
15.20_827.4928m/z	TR16424_c0_g1	0.393063	0.20623
15.41_671.2710m/z	TR16424_c0_g1	0.516814	0.0853425
15.41_683.2455m/z	TR16424_c0_g1	0.504884	0.0941012
15.76_652.2898n	TR16424_c0_g1	0.276269	0.384725
18.08_546.3906n	TR16424_c0_g1	-0.863973	0.000290598
3.73_482.1745m/z	TR16424_c0_g1	0.840508	0.000617827
3.79_448.1942m/z	TR16424_c0_g1	0.895672	8.15105e-05
4.10_229.0858m/z	TR16424_c0_g1	0.826493	0.000918182
4.16_257.1382m/z	TR16424_c0_g1	-0.907699	4.51102e-05
4.16_441.1731m/z	TR16424_c0_g1	-0.87936	0.000163802
4.43_281.1029m/z	TR16424_c0_g1	0.743163	0.00561052
5.20_553.1925m/z	TR16424_c0_g1	-0.226131	0.479744
6.05_501.3218m/z	TR16424_c0_g1	-0.385254	0.216192
6.80_599.1983m/z	TR16424_c0_g1	-0.319299	0.311706
10.83_945.7187m/z	TR16746_c0_g1	-0.389481	0.210763
10.84_929.5126m/z	TR16746_c0_g1	-0.383761	0.21813
13.83_703.2256m/z	TR16746_c0_g1	0.264379	0.406325
13.83_719.2211m/z	TR16746_c0_g1	0.250382	0.43251
13.83_721.2324m/z	TR16746_c0_g1	0.289656	0.361132
14.16_409.1882m/z	TR16746_c0_g1	0.954802	1.37677e-06
14.26_243.2106m/z	TR16746_c0_g1	0.858243	0.000353598
14.26_261.2211m/z	TR16746_c0_g1	0.86266	0.000304194
14.26_335.2582m/z	TR16746_c0_g1	0.870525	0.000229655
14.26_349.1982m/z	TR16746_c0_g1	0.848682	0.000481854
14.26_353.2683m/z	TR16746_c0_g1	0.867415	0.000257196
14.60_263.2367m/z	TR16746_c0_g1	0.966856	2.9793e-07
14.60_355.2832m/z	TR16746_c0_g1	0.968986	2.14529e-07
14.70_245.2261m/z	TR16746_c0_g1	0.922148	1.97422e-05
14.70_337.2735m/z	TR16746_c0_g1	0.919262	2.35657e-05
14.70_354.2764n	TR16746_c0_g1	0.902731	5.81268e-05
14.70_653.2608m/z	TR16746_c0_g1	0.620645	0.0312809
14.71_309.1671m/z	TR16746_c0_g1	0.929563	1.21217e-05
15.11_429.1946m/z	TR16746_c0_g1	0.950638	2.12402e-06
15.37_365.2684m/z	TR16746_c0_g1	0.889823	0.000105983
15.42_293.2473m/z	TR16746_c0_g1	0.935701	7.76525e-06
15.46_713.2560m/z	TR16746_c0_g1	0.355381	0.256944
15.58_567.4195m/z	TR16746_c0_g1	0.257519	0.419057
15.75_295.2630m/z	TR16746_c0_g1	0.97283	1.11418e-07
4.57_323.1246m/z	TR16746_c0_g1	0.947857	2.78043e-06
0.66_199.0009m/z	TR16746_c0_g1	0.887453	0.000117399
0.77_606.0743m/z	TR16746_c0_g1	0.235715	0.4608
0.94_129.0192m/z	TR16746_c0_g1	0.74598	0.00533715
0.95_130.9984m/z	TR16746_c0_g1	0.762578	0.00392471
0.95_87.0086m/z	TR16746_c0_g1	0.78635	0.00241836
1.12_111.0086m/z	TR16746_c0_g1	0.721857	0.00803363
13.35_689.2099m/z	TR16746_c0_g1	0.212422	0.507443
15.00_609.2711m/z	TR16746_c0_g1	0.163265	0.612157
15.07_357.2992m/z	TR16746_c0_g1	0.889163	0.000109071
15.17_265.2524m/z	TR16746_c0_g1	0.896021	8.02024e-05
15.18_273.1307m/z	TR16746_c0_g1	0.484676	0.110279
15.20_827.4928m/z	TR16746_c0_g1	0.242329	0.447938
15.41_671.2710m/z	TR16746_c0_g1	0.421558	0.172285
15.41_683.2455m/z	TR16746_c0_g1	0.422168	0.1716
15.76_652.2898n	TR16746_c0_g1	0.150783	0.639952
18.08_546.3906n	TR16746_c0_g1	-0.859697	0.000336687
3.73_482.1745m/z	TR16746_c0_g1	0.824981	0.000956313
3.79_448.1942m/z	TR16746_c0_g1	0.825249	0.000949462
4.10_229.0858m/z	TR16746_c0_g1	0.90888	4.23843e-05
4.16_257.1382m/z	TR16746_c0_g1	-0.859361	0.000340535
4.16_441.1731m/z	TR16746_c0_g1	-0.876336	0.00018441
4.43_281.1029m/z	TR16746_c0_g1	0.842697	0.000578817
5.20_553.1925m/z	TR16746_c0_g1	-0.401469	0.195822
6.05_501.3218m/z	TR16746_c0_g1	-0.519104	0.0837274
6.80_599.1983m/z	TR16746_c0_g1	-0.156454	0.62727
10.83_945.7187m/z	TR17248_c0_g1	-0.554588	0.0612922
10.84_929.5126m/z	TR17248_c0_g1	-0.544075	0.0674419
13.83_703.2256m/z	TR17248_c0_g1	0.407744	0.188269
13.83_719.2211m/z	TR17248_c0_g1	0.380545	0.222338
13.83_721.2324m/z	TR17248_c0_g1	0.413638	0.18134
14.16_409.1882m/z	TR17248_c0_g1	0.971906	1.31486e-07
14.26_243.2106m/z	TR17248_c0_g1	0.901867	6.06659e-05
14.26_261.2211m/z	TR17248_c0_g1	0.906835	4.71899e-05
14.26_335.2582m/z	TR17248_c0_g1	0.912396	3.50248e-05
14.26_349.1982m/z	TR17248_c0_g1	0.870021	0.000233957
14.26_353.2683m/z	TR17248_c0_g1	0.90645	4.81421e-05
14.60_263.2367m/z	TR17248_c0_g1	0.95421	1.46779e-06
14.60_355.2832m/z	TR17248_c0_g1	0.955692	1.24835e-06
14.70_245.2261m/z	TR17248_c0_g1	0.912343	3.51274e-05
14.70_337.2735m/z	TR17248_c0_g1	0.911762	3.62711e-05
14.70_354.2764n	TR17248_c0_g1	0.895806	8.10054e-05
14.70_653.2608m/z	TR17248_c0_g1	0.726291	0.00747474
14.71_309.1671m/z	TR17248_c0_g1	0.903468	5.60293e-05
15.11_429.1946m/z	TR17248_c0_g1	0.950693	2.11225e-06
15.37_365.2684m/z	TR17248_c0_g1	0.901704	6.11537e-05
15.42_293.2473m/z	TR17248_c0_g1	0.959858	7.67285e-07
15.46_713.2560m/z	TR17248_c0_g1	0.493045	0.103371
15.58_567.4195m/z	TR17248_c0_g1	0.404329	0.192357
15.75_295.2630m/z	TR17248_c0_g1	0.958137	9.43712e-07
4.57_323.1246m/z	TR17248_c0_g1	0.960203	7.35274e-07
0.66_199.0009m/z	TR17248_c0_g1	0.899389	6.8427e-05
0.77_606.0743m/z	TR17248_c0_g1	0.389378	0.210895
0.94_129.0192m/z	TR17248_c0_g1	0.865372	0.000276631
0.95_130.9984m/z	TR17248_c0_g1	0.848912	0.00047839
0.95_87.0086m/z	TR17248_c0_g1	0.889938	0.000105453
1.12_111.0086m/z	TR17248_c0_g1	0.844858	0.000542201
13.35_689.2099m/z	TR17248_c0_g1	0.353148	0.260158
15.00_609.2711m/z	TR17248_c0_g1	0.300816	0.342063
15.07_357.2992m/z	TR17248_c0_g1	0.885632	0.000126808
15.17_265.2524m/z	TR17248_c0_g1	0.877298	0.000177649
15.18_273.1307m/z	TR17248_c0_g1	0.621721	0.0309043
15.20_827.4928m/z	TR17248_c0_g1	0.387616	0.213149
15.41_671.2710m/z	TR17248_c0_g1	0.529198	0.0768535
15.41_683.2455m/z	TR17248_c0_g1	0.527319	0.0781028
15.76_652.2898n	TR17248_c0_g1	0.278088	0.381474
18.08_546.3906n	TR17248_c0_g1	-0.867103	0.000260093
3.73_482.1745m/z	TR17248_c0_g1	0.873106	0.000208603
3.79_448.1942m/z	TR17248_c0_g1	0.876366	0.000184199
4.10_229.0858m/z	TR17248_c0_g1	0.86281	0.000302617
4.16_257.1382m/z	TR17248_c0_g1	-0.888443	0.000112521
4.16_441.1731m/z	TR17248_c0_g1	-0.897442	7.50567e-05
4.43_281.1029m/z	TR17248_c0_g1	0.780568	0.00273491
5.20_553.1925m/z	TR17248_c0_g1	-0.237614	0.457089
6.05_501.3218m/z	TR17248_c0_g1	-0.383677	0.21824
6.80_599.1983m/z	TR17248_c0_g1	-0.373058	0.232326
10.83_945.7187m/z	TR18303_c0_g1	-0.537582	0.0714462
10.84_929.5126m/z	TR18303_c0_g1	-0.536619	0.0720536
13.83_703.2256m/z	TR18303_c0_g1	0.407726	0.188291
13.83_719.2211m/z	TR18303_c0_g1	0.388848	0.211571
13.83_721.2324m/z	TR18303_c0_g1	0.421831	0.171978
14.16_409.1882m/z	TR18303_c0_g1	0.973924	9.08792e-08
14.26_243.2106m/z	TR18303_c0_g1	0.890393	0.000103374
14.26_261.2211m/z	TR18303_c0_g1	0.895994	8.03038e-05
14.26_335.2582m/z	TR18303_c0_g1	0.905159	5.1443e-05
14.26_349.1982m/z	TR18303_c0_g1	0.860708	0.000325311
14.26_353.2683m/z	TR18303_c0_g1	0.896952	7.67985e-05
14.60_263.2367m/z	TR18303_c0_g1	0.969603	1.94205e-07
14.60_355.2832m/z	TR18303_c0_g1	0.979634	2.66648e-08
14.70_245.2261m/z	TR18303_c0_g1	0.924983	1.648e-05
14.70_337.2735m/z	TR18303_c0_g1	0.92693	1.44979e-05
14.70_354.2764n	TR18303_c0_g1	0.918306	2.49542e-05
14.70_653.2608m/z	TR18303_c0_g1	0.735193	0.00644112
14.71_309.1671m/z	TR18303_c0_g1	0.910478	3.89026e-05
15.11_429.1946m/z	TR18303_c0_g1	0.975237	7.03456e-08
15.37_365.2684m/z	TR18303_c0_g1	0.886055	0.000124569
15.42_293.2473m/z	TR18303_c0_g1	0.949798	2.30774e-06
15.46_713.2560m/z	TR18303_c0_g1	0.497823	0.0995598
15.58_567.4195m/z	TR18303_c0_g1	0.404145	0.192579
15.75_295.2630m/z	TR18303_c0_g1	0.969629	1.93403e-07
4.57_323.1246m/z	TR18303_c0_g1	0.945879	3.33804e-06
0.66_199.0009m/z	TR18303_c0_g1	0.858829	0.000346706
0.77_606.0743m/z	TR18303_c0_g1	0.355162	0.257258
0.94_129.0192m/z	TR18303_c0_g1	0.793665	0.00205882
0.95_130.9984m/z	TR18303_c0_g1	0.777229	0.00293163
0.95_87.0086m/z	TR18303_c0_g1	0.821181	0.00105753
1.12_111.0086m/z	TR18303_c0_g1	0.77044	0.00336454
13.35_689.2099m/z	TR18303_c0_g1	0.36323	0.245833
15.00_609.2711m/z	TR18303_c0_g1	0.318458	0.313053
15.07_357.2992m/z	TR18303_c0_g1	0.923196	1.84816e-05
15.17_265.2524m/z	TR18303_c0_g1	0.92	2.25368e-05
15.18_273.1307m/z	TR18303_c0_g1	0.604257	0.037433
15.20_827.4928m/z	TR18303_c0_g1	0.386186	0.214989
15.41_671.2710m/z	TR18303_c0_g1	0.56873	0.0536489
15.41_683.2455m/z	TR18303_c0_g1	0.567089	0.0544999
15.76_652.2898n	TR18303_c0_g1	0.300471	0.342645
18.08_546.3906n	TR18303_c0_g1	-0.889507	0.000107455
3.73_482.1745m/z	TR18303_c0_g1	0.897387	7.52509e-05
3.79_448.1942m/z	TR18303_c0_g1	0.812158	0.00133099
4.10_229.0858m/z	TR18303_c0_g1	0.892327	9.48884e-05
4.16_257.1382m/z	TR18303_c0_g1	-0.878234	0.000171253
4.16_441.1731m/z	TR18303_c0_g1	-0.877493	0.000176302
4.43_281.1029m/z	TR18303_c0_g1	0.794703	0.00201133
5.20_553.1925m/z	TR18303_c0_g1	-0.252698	0.428121
6.05_501.3218m/z	TR18303_c0_g1	-0.374579	0.230275
6.80_599.1983m/z	TR18303_c0_g1	-0.324081	0.304103
10.83_945.7187m/z	TR19203_c0_g1	-0.665084	0.0182741
10.84_929.5126m/z	TR19203_c0_g1	-0.672088	0.016662
13.83_703.2256m/z	TR19203_c0_g1	0.550246	0.0637832
13.83_719.2211m/z	TR19203_c0_g1	0.526499	0.0786521
13.83_721.2324m/z	TR19203_c0_g1	0.556354	0.0602987
14.16_409.1882m/z	TR19203_c0_g1	0.975689	6.42103e-08
14.26_243.2106m/z	TR19203_c0_g1	0.930783	1.11309e-05
14.26_261.2211m/z	TR19203_c0_g1	0.932539	9.81832e-06
14.26_335.2582m/z	TR19203_c0_g1	0.93842	6.28566e-06
14.26_349.1982m/z	TR19203_c0_g1	0.897757	7.39491e-05
14.26_353.2683m/z	TR19203_c0_g1	0.930619	1.12604e-05
14.60_263.2367m/z	TR19203_c0_g1	0.943344	4.17859e-06
14.60_355.2832m/z	TR19203_c0_g1	0.944732	3.69973e-06
14.70_245.2261m/z	TR19203_c0_g1	0.908043	4.43027e-05
14.70_337.2735m/z	TR19203_c0_g1	0.911886	3.60244e-05
14.70_354.2764n	TR19203_c0_g1	0.903607	5.56418e-05
14.70_653.2608m/z	TR19203_c0_g1	0.826329	0.00092226
14.71_309.1671m/z	TR19203_c0_g1	0.898555	7.12071e-05
15.11_429.1946m/z	TR19203_c0_g1	0.968401	2.35294e-07
15.37_365.2684m/z	TR19203_c0_g1	0.911	3.78153e-05
15.42_293.2473m/z	TR19203_c0_g1	0.968936	2.16222e-07
15.46_713.2560m/z	TR19203_c0_g1	0.628048	0.028755
15.58_567.4195m/z	TR19203_c0_g1	0.546121	0.0662134
15.75_295.2630m/z	TR19203_c0_g1	0.95193	1.86434e-06
4.57_323.1246m/z	TR19203_c0_g1	0.949785	2.31051e-06
0.66_199.0009m/z	TR19203_c0_g1	0.846214	0.000520169
0.77_606.0743m/z	TR19203_c0_g1	0.507819	0.0918929
0.94_129.0192m/z	TR19203_c0_g1	0.876518	0.000183116
0.95_130.9984m/z	TR19203_c0_g1	0.835007	0.00072486
0.95_87.0086m/z	TR19203_c0_g1	0.884699	0.000131847
1.12_111.0086m/z	TR19203_c0_g1	0.845548	0.000530899
13.35_689.2099m/z	TR19203_c0_g1	0.502724	0.095749
15.00_609.2711m/z	TR19203_c0_g1	0.443013	0.149202
15.07_357.2992m/z	TR19203_c0_g1	0.891868	9.68507e-05
15.17_265.2524m/z	TR19203_c0_g1	0.88983	0.000105954
15.18_273.1307m/z	TR19203_c0_g1	0.709698	0.00972681
15.20_827.4928m/z	TR19203_c0_g1	0.531227	0.0755203
15.41_671.2710m/z	TR19203_c0_g1	0.658161	0.0199768
15.41_683.2455m/z	TR19203_c0_g1	0.653932	0.0210725
15.76_652.2898n	TR19203_c0_g1	0.433401	0.159283
18.08_546.3906n	TR19203_c0_g1	-0.895505	8.21408e-05
3.73_482.1745m/z	TR19203_c0_g1	0.910881	3.806e-05
3.79_448.1942m/z	TR19203_c0_g1	0.83089	0.000813941
4.10_229.0858m/z	TR19203_c0_g1	0.821277	0.00105487
4.16_257.1382m/z	TR19203_c0_g1	-0.887382	0.000117754
4.16_441.1731m/z	TR19203_c0_g1	-0.883128	0.000140696
4.43_281.1029m/z	TR19203_c0_g1	0.69595	0.0119467
5.20_553.1925m/z	TR19203_c0_g1	-0.0872034	0.787559
6.05_501.3218m/z	TR19203_c0_g1	-0.228125	0.475774
6.80_599.1983m/z	TR19203_c0_g1	-0.482374	0.112231
10.83_945.7187m/z	TR193_c3_g1	-0.578846	0.048609
10.84_929.5126m/z	TR193_c3_g1	-0.570718	0.0526307
13.83_703.2256m/z	TR193_c3_g1	0.432526	0.160221
13.83_719.2211m/z	TR193_c3_g1	0.404042	0.192703
13.83_721.2324m/z	TR193_c3_g1	0.436256	0.156245
14.16_409.1882m/z	TR193_c3_g1	0.96845	2.33478e-07
14.26_243.2106m/z	TR193_c3_g1	0.895138	8.35402e-05
14.26_261.2211m/z	TR193_c3_g1	0.900049	6.6286e-05
14.26_335.2582m/z	TR193_c3_g1	0.907543	4.54815e-05
14.26_349.1982m/z	TR193_c3_g1	0.85531	0.000389701
14.26_353.2683m/z	TR193_c3_g1	0.900722	6.41598e-05
14.60_263.2367m/z	TR193_c3_g1	0.960668	6.93941e-07
14.60_355.2832m/z	TR193_c3_g1	0.969806	1.87885e-07
14.70_245.2261m/z	TR193_c3_g1	0.920874	2.13645e-05
14.70_337.2735m/z	TR193_c3_g1	0.923149	1.85374e-05
14.70_354.2764n	TR193_c3_g1	0.914487	3.11523e-05
14.70_653.2608m/z	TR193_c3_g1	0.749229	0.00503445
14.71_309.1671m/z	TR193_c3_g1	0.898353	7.18923e-05
15.11_429.1946m/z	TR193_c3_g1	0.969162	2.08544e-07
15.37_365.2684m/z	TR193_c3_g1	0.857871	0.000358028
15.42_293.2473m/z	TR193_c3_g1	0.944534	3.7653e-06
15.46_713.2560m/z	TR193_c3_g1	0.523199	0.0808904
15.58_567.4195m/z	TR193_c3_g1	0.439075	0.153281
15.75_295.2630m/z	TR193_c3_g1	0.95569	1.24853e-06
4.57_323.1246m/z	TR193_c3_g1	0.935615	7.81603e-06
0.66_199.0009m/z	TR193_c3_g1	0.860692	0.000325489
0.77_606.0743m/z	TR193_c3_g1	0.382573	0.219679
0.94_129.0192m/z	TR193_c3_g1	0.810476	0.00138748
0.95_130.9984m/z	TR193_c3_g1	0.777466	0.00291727
0.95_87.0086m/z	TR193_c3_g1	0.832513	0.000777886
1.12_111.0086m/z	TR193_c3_g1	0.789061	0.00227994
13.35_689.2099m/z	TR193_c3_g1	0.388988	0.211393
15.00_609.2711m/z	TR193_c3_g1	0.34525	0.271712
15.07_357.2992m/z	TR193_c3_g1	0.926781	1.46422e-05
15.17_265.2524m/z	TR193_c3_g1	0.91436	3.13779e-05
15.18_273.1307m/z	TR193_c3_g1	0.617084	0.0325508
15.20_827.4928m/z	TR193_c3_g1	0.415797	0.178843
15.41_671.2710m/z	TR193_c3_g1	0.58837	0.0441772
15.41_683.2455m/z	TR193_c3_g1	0.584104	0.0461255
15.76_652.2898n	TR193_c3_g1	0.323585	0.304888
18.08_546.3906n	TR193_c3_g1	-0.864158	0.000288721
3.73_482.1745m/z	TR193_c3_g1	0.908021	4.43528e-05
3.79_448.1942m/z	TR193_c3_g1	0.806005	0.00154654
4.10_229.0858m/z	TR193_c3_g1	0.888332	0.000113059
4.16_257.1382m/z	TR193_c3_g1	-0.86848	0.000247486
4.16_441.1731m/z	TR193_c3_g1	-0.878946	0.000166511
4.43_281.1029m/z	TR193_c3_g1	0.792468	0.00211467
5.20_553.1925m/z	TR193_c3_g1	-0.219653	0.492747
6.05_501.3218m/z	TR193_c3_g1	-0.342657	0.275568
6.80_599.1983m/z	TR193_c3_g1	-0.384151	0.217623
10.83_945.7187m/z	TR19697_c0_g1	-0.674194	0.0161983
10.84_929.5126m/z	TR19697_c0_g1	-0.664805	0.0183404
13.83_703.2256m/z	TR19697_c0_g1	0.547691	0.0652807
13.83_719.2211m/z	TR19697_c0_g1	0.527142	0.0782211
13.83_721.2324m/z	TR19697_c0_g1	0.558156	0.059297
14.16_409.1882m/z	TR19697_c0_g1	0.981551	1.63177e-08
14.26_243.2106m/z	TR19697_c0_g1	0.94103	5.08433e-06
14.26_261.2211m/z	TR19697_c0_g1	0.942465	4.50621e-06
14.26_335.2582m/z	TR19697_c0_g1	0.950224	2.21298e-06
14.26_349.1982m/z	TR19697_c0_g1	0.910702	3.84331e-05
14.26_353.2683m/z	TR19697_c0_g1	0.940672	5.23723e-06
14.60_263.2367m/z	TR19697_c0_g1	0.941915	4.72118e-06
14.60_355.2832m/z	TR19697_c0_g1	0.938276	6.35791e-06
14.70_245.2261m/z	TR19697_c0_g1	0.90606	4.91202e-05
14.70_337.2735m/z	TR19697_c0_g1	0.910394	3.9079e-05
14.70_354.2764n	TR19697_c0_g1	0.900648	6.43922e-05
14.70_653.2608m/z	TR19697_c0_g1	0.823295	0.00100025
14.71_309.1671m/z	TR19697_c0_g1	0.900523	6.4785e-05
15.11_429.1946m/z	TR19697_c0_g1	0.96038	7.19353e-07
15.37_365.2684m/z	TR19697_c0_g1	0.919149	2.37261e-05
15.42_293.2473m/z	TR19697_c0_g1	0.979795	2.56356e-08
15.46_713.2560m/z	TR19697_c0_g1	0.618164	0.032162
15.58_567.4195m/z	TR19697_c0_g1	0.543899	0.0675488
15.75_295.2630m/z	TR19697_c0_g1	0.952762	1.71077e-06
4.57_323.1246m/z	TR19697_c0_g1	0.942318	4.56275e-06
0.66_199.0009m/z	TR19697_c0_g1	0.875387	0.000191281
0.77_606.0743m/z	TR19697_c0_g1	0.525131	0.0795749
0.94_129.0192m/z	TR19697_c0_g1	0.894677	8.53248e-05
0.95_130.9984m/z	TR19697_c0_g1	0.859242	0.000341913
0.95_87.0086m/z	TR19697_c0_g1	0.90277	5.80145e-05
1.12_111.0086m/z	TR19697_c0_g1	0.866661	0.000264238
13.35_689.2099m/z	TR19697_c0_g1	0.498096	0.0993444
15.00_609.2711m/z	TR19697_c0_g1	0.439385	0.152957
15.07_357.2992m/z	TR19697_c0_g1	0.865869	0.000271804
15.17_265.2524m/z	TR19697_c0_g1	0.867309	0.00025817
15.18_273.1307m/z	TR19697_c0_g1	0.716721	0.00871943
15.20_827.4928m/z	TR19697_c0_g1	0.529627	0.0765703
15.41_671.2710m/z	TR19697_c0_g1	0.641096	0.0246661
15.41_683.2455m/z	TR19697_c0_g1	0.633565	0.0269708
15.76_652.2898n	TR19697_c0_g1	0.423102	0.170553
18.08_546.3906n	TR19697_c0_g1	-0.87311	0.000208573
3.73_482.1745m/z	TR19697_c0_g1	0.910306	3.92651e-05
3.79_448.1942m/z	TR19697_c0_g1	0.850159	0.00045999
4.10_229.0858m/z	TR19697_c0_g1	0.821121	0.0010592
4.16_257.1382m/z	TR19697_c0_g1	-0.892659	9.34862e-05
4.16_441.1731m/z	TR19697_c0_g1	-0.880099	0.000159054
4.43_281.1029m/z	TR19697_c0_g1	0.702653	0.010822
5.20_553.1925m/z	TR19697_c0_g1	-0.0896481	0.781729
6.05_501.3218m/z	TR19697_c0_g1	-0.239749	0.452934
6.80_599.1983m/z	TR19697_c0_g1	-0.489415	0.106331
10.83_945.7187m/z	TR20185_c0_g1	-0.562154	0.0571151
10.84_929.5126m/z	TR20185_c0_g1	-0.566075	0.0550301
13.83_703.2256m/z	TR20185_c0_g1	0.441126	0.151148
13.83_719.2211m/z	TR20185_c0_g1	0.421859	0.171947
13.83_721.2324m/z	TR20185_c0_g1	0.455166	0.137054
14.16_409.1882m/z	TR20185_c0_g1	0.980869	1.95436e-08
14.26_243.2106m/z	TR20185_c0_g1	0.914737	3.0712e-05
14.26_261.2211m/z	TR20185_c0_g1	0.91751	2.61566e-05
14.26_335.2582m/z	TR20185_c0_g1	0.923504	1.81243e-05
14.26_349.1982m/z	TR20185_c0_g1	0.889233	0.00010874
14.26_353.2683m/z	TR20185_c0_g1	0.917117	2.67679e-05
14.60_263.2367m/z	TR20185_c0_g1	0.961548	6.20583e-07
14.60_355.2832m/z	TR20185_c0_g1	0.961793	6.01314e-07
14.70_245.2261m/z	TR20185_c0_g1	0.918302	2.49601e-05
14.70_337.2735m/z	TR20185_c0_g1	0.918486	2.46869e-05
14.70_354.2764n	TR20185_c0_g1	0.905062	5.16955e-05
14.70_653.2608m/z	TR20185_c0_g1	0.752538	0.00473972
14.71_309.1671m/z	TR20185_c0_g1	0.917354	2.63986e-05
15.11_429.1946m/z	TR20185_c0_g1	0.96481	4.00601e-07
15.37_365.2684m/z	TR20185_c0_g1	0.931697	1.04318e-05
15.42_293.2473m/z	TR20185_c0_g1	0.971603	1.38656e-07
15.46_713.2560m/z	TR20185_c0_g1	0.523381	0.0807654
15.58_567.4195m/z	TR20185_c0_g1	0.430139	0.1628
15.75_295.2630m/z	TR20185_c0_g1	0.970893	1.56682e-07
4.57_323.1246m/z	TR20185_c0_g1	0.971973	1.29942e-07
0.66_199.0009m/z	TR20185_c0_g1	0.881684	0.000149227
0.77_606.0743m/z	TR20185_c0_g1	0.414629	0.180192
0.94_129.0192m/z	TR20185_c0_g1	0.862285	0.000308166
0.95_130.9984m/z	TR20185_c0_g1	0.849622	0.000467839
0.95_87.0086m/z	TR20185_c0_g1	0.884422	0.000133375
1.12_111.0086m/z	TR20185_c0_g1	0.834626	0.000732778
13.35_689.2099m/z	TR20185_c0_g1	0.387493	0.213306
15.00_609.2711m/z	TR20185_c0_g1	0.328173	0.297682
15.07_357.2992m/z	TR20185_c0_g1	0.887484	0.000117244
15.17_265.2524m/z	TR20185_c0_g1	0.888091	0.000114237
15.18_273.1307m/z	TR20185_c0_g1	0.641715	0.0244834
15.20_827.4928m/z	TR20185_c0_g1	0.418427	0.17583
15.41_671.2710m/z	TR20185_c0_g1	0.558955	0.058856
15.41_683.2455m/z	TR20185_c0_g1	0.557492	0.0596648
15.76_652.2898n	TR20185_c0_g1	0.315234	0.31825
18.08_546.3906n	TR20185_c0_g1	-0.90277	5.80148e-05
3.73_482.1745m/z	TR20185_c0_g1	0.877652	0.000175206
3.79_448.1942m/z	TR20185_c0_g1	0.87118	0.000224169
4.10_229.0858m/z	TR20185_c0_g1	0.851724	0.000437672
4.16_257.1382m/z	TR20185_c0_g1	-0.897584	7.45544e-05
4.16_441.1731m/z	TR20185_c0_g1	-0.896303	7.91604e-05
4.43_281.1029m/z	TR20185_c0_g1	0.751622	0.00481995
5.20_553.1925m/z	TR20185_c0_g1	-0.208272	0.515965
6.05_501.3218m/z	TR20185_c0_g1	-0.354325	0.258461
6.80_599.1983m/z	TR20185_c0_g1	-0.366424	0.241393
10.83_945.7187m/z	TR20204_c0_g1	-0.493477	0.103022
10.84_929.5126m/z	TR20204_c0_g1	-0.481559	0.112928
13.83_703.2256m/z	TR20204_c0_g1	0.343947	0.273645
13.83_719.2211m/z	TR20204_c0_g1	0.326497	0.300302
13.83_721.2324m/z	TR20204_c0_g1	0.363173	0.245912
14.16_409.1882m/z	TR20204_c0_g1	0.973379	1.00686e-07
14.26_243.2106m/z	TR20204_c0_g1	0.905453	5.06754e-05
14.26_261.2211m/z	TR20204_c0_g1	0.906813	4.72459e-05
14.26_335.2582m/z	TR20204_c0_g1	0.910743	3.83467e-05
14.26_349.1982m/z	TR20204_c0_g1	0.885674	0.000126584
14.26_353.2683m/z	TR20204_c0_g1	0.907826	4.48112e-05
14.60_263.2367m/z	TR20204_c0_g1	0.960738	6.87865e-07
14.60_355.2832m/z	TR20204_c0_g1	0.95407	1.48997e-06
14.70_245.2261m/z	TR20204_c0_g1	0.919716	2.29281e-05
14.70_337.2735m/z	TR20204_c0_g1	0.917475	2.62107e-05
14.70_354.2764n	TR20204_c0_g1	0.903335	5.64033e-05
14.70_653.2608m/z	TR20204_c0_g1	0.6732	0.0164159
14.71_309.1671m/z	TR20204_c0_g1	0.923955	1.76092e-05
15.11_429.1946m/z	TR20204_c0_g1	0.941752	4.78642e-06
15.37_365.2684m/z	TR20204_c0_g1	0.93418	8.70574e-06
15.42_293.2473m/z	TR20204_c0_g1	0.964872	3.97107e-07
15.46_713.2560m/z	TR20204_c0_g1	0.423579	0.170021
15.58_567.4195m/z	TR20204_c0_g1	0.333213	0.289876
15.75_295.2630m/z	TR20204_c0_g1	0.968035	2.49073e-07
4.57_323.1246m/z	TR20204_c0_g1	0.969487	1.9791e-07
0.66_199.0009m/z	TR20204_c0_g1	0.891711	9.75302e-05
0.77_606.0743m/z	TR20204_c0_g1	0.330768	0.293648
0.94_129.0192m/z	TR20204_c0_g1	0.843388	0.000566914
0.95_130.9984m/z	TR20204_c0_g1	0.852198	0.000431084
0.95_87.0086m/z	TR20204_c0_g1	0.876218	0.000185259
1.12_111.0086m/z	TR20204_c0_g1	0.822884	0.0010112
13.35_689.2099m/z	TR20204_c0_g1	0.287124	0.365534
15.00_609.2711m/z	TR20204_c0_g1	0.21414	0.503934
15.07_357.2992m/z	TR20204_c0_g1	0.855037	0.000393204
15.17_265.2524m/z	TR20204_c0_g1	0.856764	0.000371456
15.18_273.1307m/z	TR20204_c0_g1	0.567288	0.054396
15.20_827.4928m/z	TR20204_c0_g1	0.32433	0.30371
15.41_671.2710m/z	TR20204_c0_g1	0.456969	0.135308
15.41_683.2455m/z	TR20204_c0_g1	0.453208	0.138966
15.76_652.2898n	TR20204_c0_g1	0.208206	0.516102
18.08_546.3906n	TR20204_c0_g1	-0.87963	0.000162055
3.73_482.1745m/z	TR20204_c0_g1	0.827668	0.00088937
3.79_448.1942m/z	TR20204_c0_g1	0.898394	7.17556e-05
4.10_229.0858m/z	TR20204_c0_g1	0.874367	0.000198882
4.16_257.1382m/z	TR20204_c0_g1	-0.863606	0.000294349
4.16_441.1731m/z	TR20204_c0_g1	-0.869537	0.00023814
4.43_281.1029m/z	TR20204_c0_g1	0.797789	0.00187505
5.20_553.1925m/z	TR20204_c0_g1	-0.30512	0.334857
6.05_501.3218m/z	TR20204_c0_g1	-0.445411	0.146752
6.80_599.1983m/z	TR20204_c0_g1	-0.305389	0.334408
10.83_945.7187m/z	TR2290_c0_g1	-0.58202	0.0470987
10.84_929.5126m/z	TR2290_c0_g1	-0.589353	0.0437366
13.83_703.2256m/z	TR2290_c0_g1	0.463882	0.128748
13.83_719.2211m/z	TR2290_c0_g1	0.445252	0.146914
13.83_721.2324m/z	TR2290_c0_g1	0.477765	0.116209
14.16_409.1882m/z	TR2290_c0_g1	0.979582	2.70103e-08
14.26_243.2106m/z	TR2290_c0_g1	0.917124	2.67579e-05
14.26_261.2211m/z	TR2290_c0_g1	0.918629	2.44774e-05
14.26_335.2582m/z	TR2290_c0_g1	0.92441	1.71021e-05
14.26_349.1982m/z	TR2290_c0_g1	0.888253	0.000113445
14.26_353.2683m/z	TR2290_c0_g1	0.917542	2.61078e-05
14.60_263.2367m/z	TR2290_c0_g1	0.956804	1.10142e-06
14.60_355.2832m/z	TR2290_c0_g1	0.956986	1.07876e-06
14.70_245.2261m/z	TR2290_c0_g1	0.911544	3.67071e-05
14.70_337.2735m/z	TR2290_c0_g1	0.912226	3.53562e-05
14.70_354.2764n	TR2290_c0_g1	0.900463	6.49733e-05
14.70_653.2608m/z	TR2290_c0_g1	0.768392	0.00350419
14.71_309.1671m/z	TR2290_c0_g1	0.909427	4.11662e-05
15.11_429.1946m/z	TR2290_c0_g1	0.961976	5.87262e-07
15.37_365.2684m/z	TR2290_c0_g1	0.933841	8.92701e-06
15.42_293.2473m/z	TR2290_c0_g1	0.970847	1.5793e-07
15.46_713.2560m/z	TR2290_c0_g1	0.544072	0.0674437
15.58_567.4195m/z	TR2290_c0_g1	0.451339	0.140807
15.75_295.2630m/z	TR2290_c0_g1	0.965735	3.51201e-07
4.57_323.1246m/z	TR2290_c0_g1	0.971012	1.53541e-07
0.66_199.0009m/z	TR2290_c0_g1	0.87082	0.000227174
0.77_606.0743m/z	TR2290_c0_g1	0.436033	0.15648
0.94_129.0192m/z	TR2290_c0_g1	0.871231	0.00022374
0.95_130.9984m/z	TR2290_c0_g1	0.856422	0.00037569
0.95_87.0086m/z	TR2290_c0_g1	0.891245	9.95662e-05
1.12_111.0086m/z	TR2290_c0_g1	0.843596	0.000563359
13.35_689.2099m/z	TR2290_c0_g1	0.410462	0.185054
15.00_609.2711m/z	TR2290_c0_g1	0.349664	0.265219
15.07_357.2992m/z	TR2290_c0_g1	0.882074	0.000146885
15.17_265.2524m/z	TR2290_c0_g1	0.881459	0.000150592
15.18_273.1307m/z	TR2290_c0_g1	0.6614	0.0191663
15.20_827.4928m/z	TR2290_c0_g1	0.440307	0.151997
15.41_671.2710m/z	TR2290_c0_g1	0.577745	0.0491405
15.41_683.2455m/z	TR2290_c0_g1	0.575975	0.050004
15.76_652.2898n	TR2290_c0_g1	0.336861	0.284301
18.08_546.3906n	TR2290_c0_g1	-0.911404	3.69909e-05
3.73_482.1745m/z	TR2290_c0_g1	0.881649	0.000149437
3.79_448.1942m/z	TR2290_c0_g1	0.873014	0.000209326
4.10_229.0858m/z	TR2290_c0_g1	0.839296	0.000640285
4.16_257.1382m/z	TR2290_c0_g1	-0.897855	7.36083e-05
4.16_441.1731m/z	TR2290_c0_g1	-0.890338	0.000103623
4.43_281.1029m/z	TR2290_c0_g1	0.732915	0.0066947
5.20_553.1925m/z	TR2290_c0_g1	-0.178205	0.579495
6.05_501.3218m/z	TR2290_c0_g1	-0.329012	0.296374
6.80_599.1983m/z	TR2290_c0_g1	-0.392086	0.20746
10.83_945.7187m/z	TR25371_c0_g1	-0.541627	0.0689331
10.84_929.5126m/z	TR25371_c0_g1	-0.553225	0.0620669
13.83_703.2256m/z	TR25371_c0_g1	0.425199	0.168219
13.83_719.2211m/z	TR25371_c0_g1	0.408178	0.187754
13.83_721.2324m/z	TR25371_c0_g1	0.436334	0.156162
14.16_409.1882m/z	TR25371_c0_g1	0.967559	2.67978e-07
14.26_243.2106m/z	TR25371_c0_g1	0.896263	7.93083e-05
14.26_261.2211m/z	TR25371_c0_g1	0.900054	6.62711e-05
14.26_335.2582m/z	TR25371_c0_g1	0.906256	4.86265e-05
14.26_349.1982m/z	TR25371_c0_g1	0.857693	0.000360156
14.26_353.2683m/z	TR25371_c0_g1	0.898298	7.2081e-05
14.60_263.2367m/z	TR25371_c0_g1	0.95488	1.36501e-06
14.60_355.2832m/z	TR25371_c0_g1	0.956957	1.08229e-06
14.70_245.2261m/z	TR25371_c0_g1	0.904634	5.28347e-05
14.70_337.2735m/z	TR25371_c0_g1	0.902857	5.77652e-05
14.70_354.2764n	TR25371_c0_g1	0.888272	0.000113352
14.70_653.2608m/z	TR25371_c0_g1	0.735912	0.00636264
14.71_309.1671m/z	TR25371_c0_g1	0.896311	7.91322e-05
15.11_429.1946m/z	TR25371_c0_g1	0.944708	3.70772e-06
15.37_365.2684m/z	TR25371_c0_g1	0.924159	1.73813e-05
15.42_293.2473m/z	TR25371_c0_g1	0.952133	1.82589e-06
15.46_713.2560m/z	TR25371_c0_g1	0.51141	0.0892385
15.58_567.4195m/z	TR25371_c0_g1	0.407895	0.188089
15.75_295.2630m/z	TR25371_c0_g1	0.958023	9.56503e-07
4.57_323.1246m/z	TR25371_c0_g1	0.97083	1.58393e-07
0.66_199.0009m/z	TR25371_c0_g1	0.876485	0.000183353
0.77_606.0743m/z	TR25371_c0_g1	0.414694	0.180116
0.94_129.0192m/z	TR25371_c0_g1	0.869505	0.000238426
0.95_130.9984m/z	TR25371_c0_g1	0.862141	0.000309697
0.95_87.0086m/z	TR25371_c0_g1	0.893218	9.11673e-05
1.12_111.0086m/z	TR25371_c0_g1	0.838317	0.000658876
13.35_689.2099m/z	TR25371_c0_g1	0.374868	0.229886
15.00_609.2711m/z	TR25371_c0_g1	0.31755	0.314513
15.07_357.2992m/z	TR25371_c0_g1	0.883045	0.000141171
15.17_265.2524m/z	TR25371_c0_g1	0.878947	0.000166507
15.18_273.1307m/z	TR25371_c0_g1	0.638075	0.0255729
15.20_827.4928m/z	TR25371_c0_g1	0.404406	0.192264
15.41_671.2710m/z	TR25371_c0_g1	0.548505	0.0648008
15.41_683.2455m/z	TR25371_c0_g1	0.545104	0.0668224
15.76_652.2898n	TR25371_c0_g1	0.296316	0.349685
18.08_546.3906n	TR25371_c0_g1	-0.90659	4.77932e-05
3.73_482.1745m/z	TR25371_c0_g1	0.854393	0.000401561
3.79_448.1942m/z	TR25371_c0_g1	0.886785	0.000120782
4.10_229.0858m/z	TR25371_c0_g1	0.825107	0.000953084
4.16_257.1382m/z	TR25371_c0_g1	-0.901437	6.19605e-05
4.16_441.1731m/z	TR25371_c0_g1	-0.892831	9.27696e-05
4.43_281.1029m/z	TR25371_c0_g1	0.733307	0.00665058
5.20_553.1925m/z	TR25371_c0_g1	-0.204574	0.523612
6.05_501.3218m/z	TR25371_c0_g1	-0.360903	0.249097
6.80_599.1983m/z	TR25371_c0_g1	-0.352041	0.26176
10.83_945.7187m/z	TR25758_c0_g1	-0.556459	0.0602403
10.84_929.5126m/z	TR25758_c0_g1	-0.572589	0.0516851
13.83_703.2256m/z	TR25758_c0_g1	0.440164	0.152146
13.83_719.2211m/z	TR25758_c0_g1	0.421228	0.172656
13.83_721.2324m/z	TR25758_c0_g1	0.44993	0.142206
14.16_409.1882m/z	TR25758_c0_g1	0.971247	1.47487e-07
14.26_243.2106m/z	TR25758_c0_g1	0.906008	4.92512e-05
14.26_261.2211m/z	TR25758_c0_g1	0.909949	4.00278e-05
14.26_335.2582m/z	TR25758_c0_g1	0.915521	2.93655e-05
14.26_349.1982m/z	TR25758_c0_g1	0.873227	0.000207658
14.26_353.2683m/z	TR25758_c0_g1	0.908747	4.26847e-05
14.60_263.2367m/z	TR25758_c0_g1	0.958078	9.50313e-07
14.60_355.2832m/z	TR25758_c0_g1	0.960983	6.66948e-07
14.70_245.2261m/z	TR25758_c0_g1	0.916758	2.73365e-05
14.70_337.2735m/z	TR25758_c0_g1	0.916528	2.77041e-05
14.70_354.2764n	TR25758_c0_g1	0.905137	5.15006e-05
14.70_653.2608m/z	TR25758_c0_g1	0.745607	0.00537273
14.71_309.1671m/z	TR25758_c0_g1	0.908066	4.42474e-05
15.11_429.1946m/z	TR25758_c0_g1	0.959372	8.14236e-07
15.37_365.2684m/z	TR25758_c0_g1	0.929167	1.24579e-05
15.42_293.2473m/z	TR25758_c0_g1	0.955371	1.29348e-06
15.46_713.2560m/z	TR25758_c0_g1	0.527618	0.077903
15.58_567.4195m/z	TR25758_c0_g1	0.426498	0.166783
15.75_295.2630m/z	TR25758_c0_g1	0.962741	5.31175e-07
4.57_323.1246m/z	TR25758_c0_g1	0.974378	8.33105e-08
0.66_199.0009m/z	TR25758_c0_g1	0.850836	0.000450225
0.77_606.0743m/z	TR25758_c0_g1	0.407063	0.189079
0.94_129.0192m/z	TR25758_c0_g1	0.852833	0.000422376
0.95_130.9984m/z	TR25758_c0_g1	0.83673	0.000689909
0.95_87.0086m/z	TR25758_c0_g1	0.875117	0.000193273
1.12_111.0086m/z	TR25758_c0_g1	0.819126	0.00111563
13.35_689.2099m/z	TR25758_c0_g1	0.392378	0.207091
15.00_609.2711m/z	TR25758_c0_g1	0.326168	0.300819
15.07_357.2992m/z	TR25758_c0_g1	0.899642	6.76017e-05
15.17_265.2524m/z	TR25758_c0_g1	0.897967	7.32218e-05
15.18_273.1307m/z	TR25758_c0_g1	0.632273	0.0273813
15.20_827.4928m/z	TR25758_c0_g1	0.421361	0.172506
15.41_671.2710m/z	TR25758_c0_g1	0.566009	0.0550647
15.41_683.2455m/z	TR25758_c0_g1	0.563105	0.0566044
15.76_652.2898n	TR25758_c0_g1	0.318807	0.312494
18.08_546.3906n	TR25758_c0_g1	-0.915392	2.95844e-05
3.73_482.1745m/z	TR25758_c0_g1	0.860866	0.000323562
3.79_448.1942m/z	TR25758_c0_g1	0.864589	0.000284384
4.10_229.0858m/z	TR25758_c0_g1	0.83823	0.000660555
4.16_257.1382m/z	TR25758_c0_g1	-0.881471	0.00015052
4.16_441.1731m/z	TR25758_c0_g1	-0.884715	0.00013176
4.43_281.1029m/z	TR25758_c0_g1	0.736354	0.00631472
5.20_553.1925m/z	TR25758_c0_g1	-0.198663	0.535932
6.05_501.3218m/z	TR25758_c0_g1	-0.338564	0.281719
6.80_599.1983m/z	TR25758_c0_g1	-0.367517	0.239885
10.83_945.7187m/z	TR282_c0_g2	-0.562521	0.0569172
10.84_929.5126m/z	TR282_c0_g2	-0.569395	0.0533071
13.83_703.2256m/z	TR282_c0_g2	0.446326	0.145824
13.83_719.2211m/z	TR282_c0_g2	0.42597	0.167366
13.83_721.2324m/z	TR282_c0_g2	0.460635	0.131803
14.16_409.1882m/z	TR282_c0_g2	0.97899	3.11264e-08
14.26_243.2106m/z	TR282_c0_g2	0.904682	5.27053e-05
14.26_261.2211m/z	TR282_c0_g2	0.908431	4.34051e-05
14.26_335.2582m/z	TR282_c0_g2	0.915087	3.0106e-05
14.26_349.1982m/z	TR282_c0_g2	0.87439	0.000198705
14.26_353.2683m/z	TR282_c0_g2	0.909611	4.07609e-05
14.60_263.2367m/z	TR282_c0_g2	0.973869	9.18319e-08
14.60_355.2832m/z	TR282_c0_g2	0.981577	1.62062e-08
14.70_245.2261m/z	TR282_c0_g2	0.933477	9.16904e-06
14.70_337.2735m/z	TR282_c0_g2	0.935042	8.16245e-06
14.70_354.2764n	TR282_c0_g2	0.925624	1.58052e-05
14.70_653.2608m/z	TR282_c0_g2	0.762386	0.0039392
14.71_309.1671m/z	TR282_c0_g2	0.92241	1.94215e-05
15.11_429.1946m/z	TR282_c0_g2	0.986132	3.94671e-09
15.37_365.2684m/z	TR282_c0_g2	0.886695	0.000121248
15.42_293.2473m/z	TR282_c0_g2	0.958248	9.31453e-07
15.46_713.2560m/z	TR282_c0_g2	0.535348	0.0728607
15.58_567.4195m/z	TR282_c0_g2	0.444651	0.147526
15.75_295.2630m/z	TR282_c0_g2	0.976929	4.95228e-08
4.57_323.1246m/z	TR282_c0_g2	0.950112	2.23761e-06
0.66_199.0009m/z	TR282_c0_g2	0.858706	0.000348146
0.77_606.0743m/z	TR282_c0_g2	0.394081	0.204952
0.94_129.0192m/z	TR282_c0_g2	0.801345	0.0017269
0.95_130.9984m/z	TR282_c0_g2	0.775969	0.00300856
0.95_87.0086m/z	TR282_c0_g2	0.821638	0.00104495
1.12_111.0086m/z	TR282_c0_g2	0.770168	0.00338281
13.35_689.2099m/z	TR282_c0_g2	0.402018	0.195154
15.00_609.2711m/z	TR282_c0_g2	0.352942	0.260456
15.07_357.2992m/z	TR282_c0_g2	0.934665	8.39642e-06
15.17_265.2524m/z	TR282_c0_g2	0.932757	9.66487e-06
15.18_273.1307m/z	TR282_c0_g2	0.621573	0.0309557
15.20_827.4928m/z	TR282_c0_g2	0.426549	0.166727
15.41_671.2710m/z	TR282_c0_g2	0.600887	0.0387977
15.41_683.2455m/z	TR282_c0_g2	0.597141	0.0403559
15.76_652.2898n	TR282_c0_g2	0.341923	0.276665
18.08_546.3906n	TR282_c0_g2	-0.89457	8.57432e-05
3.73_482.1745m/z	TR282_c0_g2	0.907773	4.49358e-05
3.79_448.1942m/z	TR282_c0_g2	0.800561	0.00175878
4.10_229.0858m/z	TR282_c0_g2	0.883776	0.000136989
4.16_257.1382m/z	TR282_c0_g2	-0.888979	0.000109947
4.16_441.1731m/z	TR282_c0_g2	-0.894991	8.41038e-05
4.43_281.1029m/z	TR282_c0_g2	0.773999	0.00313193
5.20_553.1925m/z	TR282_c0_g2	-0.216926	0.498265
6.05_501.3218m/z	TR282_c0_g2	-0.338805	0.281354
6.80_599.1983m/z	TR282_c0_g2	-0.342694	0.275513
10.83_945.7187m/z	TR2950_c2_g1	-0.482074	0.112488
10.84_929.5126m/z	TR2950_c2_g1	-0.486393	0.108838
13.83_703.2256m/z	TR2950_c2_g1	0.364987	0.243385
13.83_719.2211m/z	TR2950_c2_g1	0.348019	0.267628
13.83_721.2324m/z	TR2950_c2_g1	0.385877	0.215387
14.16_409.1882m/z	TR2950_c2_g1	0.974483	8.16317e-08
14.26_243.2106m/z	TR2950_c2_g1	0.897125	7.61792e-05
14.26_261.2211m/z	TR2950_c2_g1	0.899693	6.7435e-05
14.26_335.2582m/z	TR2950_c2_g1	0.907585	4.53808e-05
14.26_349.1982m/z	TR2950_c2_g1	0.878565	0.000169041
14.26_353.2683m/z	TR2950_c2_g1	0.902922	5.75783e-05
14.60_263.2367m/z	TR2950_c2_g1	0.971186	1.49038e-07
14.60_355.2832m/z	TR2950_c2_g1	0.970671	1.62693e-07
14.70_245.2261m/z	TR2950_c2_g1	0.929297	1.23469e-05
14.70_337.2735m/z	TR2950_c2_g1	0.928227	1.32854e-05
14.70_354.2764n	TR2950_c2_g1	0.912009	3.5782e-05
14.70_653.2608m/z	TR2950_c2_g1	0.69545	0.0120339
14.71_309.1671m/z	TR2950_c2_g1	0.934803	8.30991e-06
15.11_429.1946m/z	TR2950_c2_g1	0.967579	2.67161e-07
15.37_365.2684m/z	TR2950_c2_g1	0.919652	2.30171e-05
15.42_293.2473m/z	TR2950_c2_g1	0.959711	7.81248e-07
15.46_713.2560m/z	TR2950_c2_g1	0.451191	0.140954
15.58_567.4195m/z	TR2950_c2_g1	0.358814	0.252049
15.75_295.2630m/z	TR2950_c2_g1	0.980691	2.0468e-08
4.57_323.1246m/z	TR2950_c2_g1	0.970183	1.76538e-07
0.66_199.0009m/z	TR2950_c2_g1	0.889924	0.000105516
0.77_606.0743m/z	TR2950_c2_g1	0.342408	0.27594
0.94_129.0192m/z	TR2950_c2_g1	0.809279	0.00142878
0.95_130.9984m/z	TR2950_c2_g1	0.8059	0.00155044
0.95_87.0086m/z	TR2950_c2_g1	0.83666	0.000691301
1.12_111.0086m/z	TR2950_c2_g1	0.773514	0.00316285
13.35_689.2099m/z	TR2950_c2_g1	0.312822	0.322168
15.00_609.2711m/z	TR2950_c2_g1	0.255326	0.423169
15.07_357.2992m/z	TR2950_c2_g1	0.902439	5.89755e-05
15.17_265.2524m/z	TR2950_c2_g1	0.906956	4.68951e-05
15.18_273.1307m/z	TR2950_c2_g1	0.561275	0.0575895
15.20_827.4928m/z	TR2950_c2_g1	0.345255	0.271705
15.41_671.2710m/z	TR2950_c2_g1	0.497973	0.0994414
15.41_683.2455m/z	TR2950_c2_g1	0.493781	0.102777
15.76_652.2898n	TR2950_c2_g1	0.245062	0.442673
18.08_546.3906n	TR2950_c2_g1	-0.882842	0.000142353
3.73_482.1745m/z	TR2950_c2_g1	0.861223	0.000319626
3.79_448.1942m/z	TR2950_c2_g1	0.846803	0.000510824
4.10_229.0858m/z	TR2950_c2_g1	0.882649	0.000143478
4.16_257.1382m/z	TR2950_c2_g1	-0.88236	0.000145186
4.16_441.1731m/z	TR2950_c2_g1	-0.902557	5.86328e-05
4.43_281.1029m/z	TR2950_c2_g1	0.795575	0.00197209
5.20_553.1925m/z	TR2950_c2_g1	-0.293296	0.354852
6.05_501.3218m/z	TR2950_c2_g1	-0.431501	0.161325
6.80_599.1983m/z	TR2950_c2_g1	-0.260125	0.414198
10.83_945.7187m/z	TR29619_c0_g1	-0.57599	0.0499967
10.84_929.5126m/z	TR29619_c0_g1	-0.571579	0.0521939
13.83_703.2256m/z	TR29619_c0_g1	0.461358	0.131119
13.83_719.2211m/z	TR29619_c0_g1	0.451886	0.140267
13.83_721.2324m/z	TR29619_c0_g1	0.48316	0.111563
14.16_409.1882m/z	TR29619_c0_g1	0.981954	1.46233e-08
14.26_243.2106m/z	TR29619_c0_g1	0.927052	1.43801e-05
14.26_261.2211m/z	TR29619_c0_g1	0.928316	1.32056e-05
14.26_335.2582m/z	TR29619_c0_g1	0.936522	7.29238e-06
14.26_349.1982m/z	TR29619_c0_g1	0.903842	5.4989e-05
14.26_353.2683m/z	TR29619_c0_g1	0.927398	1.40506e-05
14.60_263.2367m/z	TR29619_c0_g1	0.955114	1.33058e-06
14.60_355.2832m/z	TR29619_c0_g1	0.947929	2.76172e-06
14.70_245.2261m/z	TR29619_c0_g1	0.910697	3.84422e-05
14.70_337.2735m/z	TR29619_c0_g1	0.911271	3.72599e-05
14.70_354.2764n	TR29619_c0_g1	0.897766	7.39199e-05
14.70_653.2608m/z	TR29619_c0_g1	0.75995	0.00412691
14.71_309.1671m/z	TR29619_c0_g1	0.916429	2.78643e-05
15.11_429.1946m/z	TR29619_c0_g1	0.950317	2.19268e-06
15.37_365.2684m/z	TR29619_c0_g1	0.950354	2.18464e-06
15.42_293.2473m/z	TR29619_c0_g1	0.979568	2.71024e-08
15.46_713.2560m/z	TR29619_c0_g1	0.53384	0.0738263
15.58_567.4195m/z	TR29619_c0_g1	0.444234	0.147951
15.75_295.2630m/z	TR29619_c0_g1	0.967672	2.63388e-07
4.57_323.1246m/z	TR29619_c0_g1	0.961174	6.50966e-07
0.66_199.0009m/z	TR29619_c0_g1	0.896448	7.86264e-05
0.77_606.0743m/z	TR29619_c0_g1	0.460621	0.131816
0.94_129.0192m/z	TR29619_c0_g1	0.881394	0.00015099
0.95_130.9984m/z	TR29619_c0_g1	0.87791	0.000173448
0.95_87.0086m/z	TR29619_c0_g1	0.900755	6.40573e-05
1.12_111.0086m/z	TR29619_c0_g1	0.850693	0.000452272
13.35_689.2099m/z	TR29619_c0_g1	0.409139	0.186615
15.00_609.2711m/z	TR29619_c0_g1	0.345692	0.271057
15.07_357.2992m/z	TR29619_c0_g1	0.848627	0.000482675
15.17_265.2524m/z	TR29619_c0_g1	0.858648	0.000348819
15.18_273.1307m/z	TR29619_c0_g1	0.661512	0.0191388
15.20_827.4928m/z	TR29619_c0_g1	0.441262	0.151007
15.41_671.2710m/z	TR29619_c0_g1	0.55856	0.0590739
15.41_683.2455m/z	TR29619_c0_g1	0.551893	0.0628302
15.76_652.2898n	TR29619_c0_g1	0.329513	0.295595
18.08_546.3906n	TR29619_c0_g1	-0.891053	0.000100413
3.73_482.1745m/z	TR29619_c0_g1	0.862362	0.000307348
3.79_448.1942m/z	TR29619_c0_g1	0.887748	0.000115929
4.10_229.0858m/z	TR29619_c0_g1	0.823844	0.00098578
4.16_257.1382m/z	TR29619_c0_g1	-0.902827	5.78513e-05
4.16_441.1731m/z	TR29619_c0_g1	-0.881606	0.000149697
4.43_281.1029m/z	TR29619_c0_g1	0.722883	0.00790157
5.20_553.1925m/z	TR29619_c0_g1	-0.179158	0.577435
6.05_501.3218m/z	TR29619_c0_g1	-0.335344	0.286613
6.80_599.1983m/z	TR29619_c0_g1	-0.373153	0.232197
10.83_945.7187m/z	TR3178_c0_g3	-0.55419	0.0615175
10.84_929.5126m/z	TR3178_c0_g3	-0.537956	0.0712111
13.83_703.2256m/z	TR3178_c0_g3	0.412005	0.183244
13.83_719.2211m/z	TR3178_c0_g3	0.385743	0.215561
13.83_721.2324m/z	TR3178_c0_g3	0.42589	0.167454
14.16_409.1882m/z	TR3178_c0_g3	0.962067	5.80323e-07
14.26_243.2106m/z	TR3178_c0_g3	0.889171	0.000109033
14.26_261.2211m/z	TR3178_c0_g3	0.890682	0.000102069
14.26_335.2582m/z	TR3178_c0_g3	0.90058	6.46051e-05
14.26_349.1982m/z	TR3178_c0_g3	0.866576	0.000265041
14.26_353.2683m/z	TR3178_c0_g3	0.891699	9.75816e-05
14.60_263.2367m/z	TR3178_c0_g3	0.928212	1.3299e-05
14.60_355.2832m/z	TR3178_c0_g3	0.927229	1.42112e-05
14.70_245.2261m/z	TR3178_c0_g3	0.876076	0.000186277
14.70_337.2735m/z	TR3178_c0_g3	0.877556	0.000175866
14.70_354.2764n	TR3178_c0_g3	0.858401	0.000351726
14.70_653.2608m/z	TR3178_c0_g3	0.730311	0.00699363
14.71_309.1671m/z	TR3178_c0_g3	0.88176	0.000148771
15.11_429.1946m/z	TR3178_c0_g3	0.933123	9.41014e-06
15.37_365.2684m/z	TR3178_c0_g3	0.908179	4.39856e-05
15.42_293.2473m/z	TR3178_c0_g3	0.958688	8.84106e-07
15.46_713.2560m/z	TR3178_c0_g3	0.484584	0.110357
15.58_567.4195m/z	TR3178_c0_g3	0.409578	0.186096
15.75_295.2630m/z	TR3178_c0_g3	0.942396	4.53273e-06
4.57_323.1246m/z	TR3178_c0_g3	0.951395	1.96844e-06
0.66_199.0009m/z	TR3178_c0_g3	0.914305	3.14755e-05
0.77_606.0743m/z	TR3178_c0_g3	0.406937	0.189231
0.94_129.0192m/z	TR3178_c0_g3	0.879487	0.00016298
0.95_130.9984m/z	TR3178_c0_g3	0.868256	0.000249504
0.95_87.0086m/z	TR3178_c0_g3	0.902016	6.02209e-05
1.12_111.0086m/z	TR3178_c0_g3	0.862345	0.000307522
13.35_689.2099m/z	TR3178_c0_g3	0.345914	0.27073
15.00_609.2711m/z	TR3178_c0_g3	0.306346	0.332819
15.07_357.2992m/z	TR3178_c0_g3	0.843474	0.00056545
15.17_265.2524m/z	TR3178_c0_g3	0.835912	0.000706346
15.18_273.1307m/z	TR3178_c0_g3	0.637157	0.025853
15.20_827.4928m/z	TR3178_c0_g3	0.381667	0.220865
15.41_671.2710m/z	TR3178_c0_g3	0.507128	0.0924091
15.41_683.2455m/z	TR3178_c0_g3	0.507779	0.0919228
15.76_652.2898n	TR3178_c0_g3	0.270609	0.394932
18.08_546.3906n	TR3178_c0_g3	-0.848374	0.00048651
3.73_482.1745m/z	TR3178_c0_g3	0.8899	0.00010563
3.79_448.1942m/z	TR3178_c0_g3	0.885631	0.00012681
4.10_229.0858m/z	TR3178_c0_g3	0.846892	0.000509422
4.16_257.1382m/z	TR3178_c0_g3	-0.895382	8.26051e-05
4.16_441.1731m/z	TR3178_c0_g3	-0.901198	6.26899e-05
4.43_281.1029m/z	TR3178_c0_g3	0.765221	0.00372906
5.20_553.1925m/z	TR3178_c0_g3	-0.216263	0.499613
6.05_501.3218m/z	TR3178_c0_g3	-0.394591	0.204314
6.80_599.1983m/z	TR3178_c0_g3	-0.373939	0.231137
10.83_945.7187m/z	TR335_c0_g8	-0.426847	0.166398
10.84_929.5126m/z	TR335_c0_g8	-0.408611	0.187239
13.83_703.2256m/z	TR335_c0_g8	0.265541	0.404187
13.83_719.2211m/z	TR335_c0_g8	0.235592	0.461041
13.83_721.2324m/z	TR335_c0_g8	0.272567	0.391387
14.16_409.1882m/z	TR335_c0_g8	0.948232	2.68367e-06
14.26_243.2106m/z	TR335_c0_g8	0.870702	0.000228162
14.26_261.2211m/z	TR335_c0_g8	0.874614	0.000197021
14.26_335.2582m/z	TR335_c0_g8	0.883007	0.000141394
14.26_349.1982m/z	TR335_c0_g8	0.861425	0.000317425
14.26_353.2683m/z	TR335_c0_g8	0.879257	0.000164476
14.60_263.2367m/z	TR335_c0_g8	0.942626	4.44467e-06
14.60_355.2832m/z	TR335_c0_g8	0.939055	5.97454e-06
14.70_245.2261m/z	TR335_c0_g8	0.90804	4.43094e-05
14.70_337.2735m/z	TR335_c0_g8	0.906637	4.76774e-05
14.70_354.2764n	TR335_c0_g8	0.888395	0.000112755
14.70_653.2608m/z	TR335_c0_g8	0.610406	0.035032
14.71_309.1671m/z	TR335_c0_g8	0.914281	3.15175e-05
15.11_429.1946m/z	TR335_c0_g8	0.932492	9.85209e-06
15.37_365.2684m/z	TR335_c0_g8	0.901577	6.15362e-05
15.42_293.2473m/z	TR335_c0_g8	0.937456	6.78189e-06
15.46_713.2560m/z	TR335_c0_g8	0.355154	0.257269
15.58_567.4195m/z	TR335_c0_g8	0.269837	0.396336
15.75_295.2630m/z	TR335_c0_g8	0.94791	2.76662e-06
4.57_323.1246m/z	TR335_c0_g8	0.963373	4.88186e-07
0.66_199.0009m/z	TR335_c0_g8	0.891479	9.85373e-05
0.77_606.0743m/z	TR335_c0_g8	0.24133	0.449869
0.94_129.0192m/z	TR335_c0_g8	0.801966	0.00170197
0.95_130.9984m/z	TR335_c0_g8	0.80344	0.00164394
0.95_87.0086m/z	TR335_c0_g8	0.841388	0.000601901
1.12_111.0086m/z	TR335_c0_g8	0.784825	0.00249897
13.35_689.2099m/z	TR335_c0_g8	0.206823	0.518956
15.00_609.2711m/z	TR335_c0_g8	0.146498	0.649596
15.07_357.2992m/z	TR335_c0_g8	0.864095	0.000289359
15.17_265.2524m/z	TR335_c0_g8	0.861866	0.000312644
15.18_273.1307m/z	TR335_c0_g8	0.485654	0.109456
15.20_827.4928m/z	TR335_c0_g8	0.248044	0.436961
15.41_671.2710m/z	TR335_c0_g8	0.386696	0.214332
15.41_683.2455m/z	TR335_c0_g8	0.389248	0.211061
15.76_652.2898n	TR335_c0_g8	0.133391	0.679397
18.08_546.3906n	TR335_c0_g8	-0.833644	0.000753481
3.73_482.1745m/z	TR335_c0_g8	0.813039	0.00130212
3.79_448.1942m/z	TR335_c0_g8	0.870038	0.000233813
4.10_229.0858m/z	TR335_c0_g8	0.900515	6.48096e-05
4.16_257.1382m/z	TR335_c0_g8	-0.8211	0.00105978
4.16_441.1731m/z	TR335_c0_g8	-0.866253	0.000268116
4.43_281.1029m/z	TR335_c0_g8	0.849861	0.000464332
5.20_553.1925m/z	TR335_c0_g8	-0.383849	0.218015
6.05_501.3218m/z	TR335_c0_g8	-0.513188	0.0879439
6.80_599.1983m/z	TR335_c0_g8	-0.247916	0.437207
10.83_945.7187m/z	TR3399_c1_g1	-0.549261	0.0643579
10.84_929.5126m/z	TR3399_c1_g1	-0.541373	0.0690888
13.83_703.2256m/z	TR3399_c1_g1	0.411032	0.184385
13.83_719.2211m/z	TR3399_c1_g1	0.390728	0.209179
13.83_721.2324m/z	TR3399_c1_g1	0.424268	0.169252
14.16_409.1882m/z	TR3399_c1_g1	0.975267	6.99218e-08
14.26_243.2106m/z	TR3399_c1_g1	0.914581	3.09861e-05
14.26_261.2211m/z	TR3399_c1_g1	0.918046	2.53426e-05
14.26_335.2582m/z	TR3399_c1_g1	0.92433	1.71908e-05
14.26_349.1982m/z	TR3399_c1_g1	0.895167	8.34267e-05
14.26_353.2683m/z	TR3399_c1_g1	0.917661	2.5926e-05
14.60_263.2367m/z	TR3399_c1_g1	0.948881	2.52223e-06
14.60_355.2832m/z	TR3399_c1_g1	0.944059	3.92628e-06
14.70_245.2261m/z	TR3399_c1_g1	0.909778	4.03982e-05
14.70_337.2735m/z	TR3399_c1_g1	0.909675	4.06226e-05
14.70_354.2764n	TR3399_c1_g1	0.893901	8.83943e-05
14.70_653.2608m/z	TR3399_c1_g1	0.722134	0.00799782
14.71_309.1671m/z	TR3399_c1_g1	0.91334	3.32329e-05
15.11_429.1946m/z	TR3399_c1_g1	0.945644	3.40976e-06
15.37_365.2684m/z	TR3399_c1_g1	0.944331	3.83343e-06
15.42_293.2473m/z	TR3399_c1_g1	0.97149	1.41406e-07
15.46_713.2560m/z	TR3399_c1_g1	0.488789	0.106847
15.58_567.4195m/z	TR3399_c1_g1	0.400026	0.197586
15.75_295.2630m/z	TR3399_c1_g1	0.961168	6.51457e-07
4.57_323.1246m/z	TR3399_c1_g1	0.971826	1.33356e-07
0.66_199.0009m/z	TR3399_c1_g1	0.894083	8.76677e-05
0.77_606.0743m/z	TR3399_c1_g1	0.398342	0.199655
0.94_129.0192m/z	TR3399_c1_g1	0.879052	0.000165815
0.95_130.9984m/z	TR3399_c1_g1	0.872866	0.0002105
0.95_87.0086m/z	TR3399_c1_g1	0.904046	5.44271e-05
1.12_111.0086m/z	TR3399_c1_g1	0.855035	0.000393233
13.35_689.2099m/z	TR3399_c1_g1	0.353311	0.259922
15.00_609.2711m/z	TR3399_c1_g1	0.286722	0.366237
15.07_357.2992m/z	TR3399_c1_g1	0.85551	0.000387152
15.17_265.2524m/z	TR3399_c1_g1	0.85777	0.000359234
15.18_273.1307m/z	TR3399_c1_g1	0.623749	0.030203
15.20_827.4928m/z	TR3399_c1_g1	0.389886	0.210248
15.41_671.2710m/z	TR3399_c1_g1	0.508384	0.0914715
15.41_683.2455m/z	TR3399_c1_g1	0.506486	0.0928909
15.76_652.2898n	TR3399_c1_g1	0.274654	0.387625
18.08_546.3906n	TR3399_c1_g1	-0.88036	0.000157402
3.73_482.1745m/z	TR3399_c1_g1	0.851215	0.000444838
3.79_448.1942m/z	TR3399_c1_g1	0.899686	6.7457e-05
4.10_229.0858m/z	TR3399_c1_g1	0.84633	0.000518318
4.16_257.1382m/z	TR3399_c1_g1	-0.880321	0.000157649
4.16_441.1731m/z	TR3399_c1_g1	-0.885142	0.000129438
4.43_281.1029m/z	TR3399_c1_g1	0.759845	0.00413514
5.20_553.1925m/z	TR3399_c1_g1	-0.231646	0.468801
6.05_501.3218m/z	TR3399_c1_g1	-0.382508	0.219765
6.80_599.1983m/z	TR3399_c1_g1	-0.368451	0.238601
10.83_945.7187m/z	TR344_c17_g1	-0.528405	0.0773791
10.84_929.5126m/z	TR344_c17_g1	-0.529201	0.0768518
13.83_703.2256m/z	TR344_c17_g1	0.404033	0.192714
13.83_719.2211m/z	TR344_c17_g1	0.387206	0.213676
13.83_721.2324m/z	TR344_c17_g1	0.421709	0.172115
14.16_409.1882m/z	TR344_c17_g1	0.978422	3.55359e-08
14.26_243.2106m/z	TR344_c17_g1	0.913844	3.23054e-05
14.26_261.2211m/z	TR344_c17_g1	0.915369	2.96235e-05
14.26_335.2582m/z	TR344_c17_g1	0.919706	2.29428e-05
14.26_349.1982m/z	TR344_c17_g1	0.889291	0.000108467
14.26_353.2683m/z	TR344_c17_g1	0.915529	2.93531e-05
14.60_263.2367m/z	TR344_c17_g1	0.963443	4.83589e-07
14.60_355.2832m/z	TR344_c17_g1	0.958493	9.04845e-07
14.70_245.2261m/z	TR344_c17_g1	0.920486	2.18787e-05
14.70_337.2735m/z	TR344_c17_g1	0.918469	2.47129e-05
14.70_354.2764n	TR344_c17_g1	0.902804	5.79168e-05
14.70_653.2608m/z	TR344_c17_g1	0.720027	0.00827312
14.71_309.1671m/z	TR344_c17_g1	0.924559	1.69391e-05
15.11_429.1946m/z	TR344_c17_g1	0.953356	1.60752e-06
15.37_365.2684m/z	TR344_c17_g1	0.937486	6.76619e-06
15.42_293.2473m/z	TR344_c17_g1	0.971082	1.51724e-07
15.46_713.2560m/z	TR344_c17_g1	0.484767	0.110202
15.58_567.4195m/z	TR344_c17_g1	0.390851	0.209022
15.75_295.2630m/z	TR344_c17_g1	0.972983	1.0834e-07
4.57_323.1246m/z	TR344_c17_g1	0.974737	7.76804e-08
0.66_199.0009m/z	TR344_c17_g1	0.895406	8.25154e-05
0.77_606.0743m/z	TR344_c17_g1	0.394779	0.204078
0.94_129.0192m/z	TR344_c17_g1	0.86288	0.000301873
0.95_130.9984m/z	TR344_c17_g1	0.861333	0.000318432
0.95_87.0086m/z	TR344_c17_g1	0.8876	0.000116665
1.12_111.0086m/z	TR344_c17_g1	0.833305	0.000760722
13.35_689.2099m/z	TR344_c17_g1	0.348957	0.266252
15.00_609.2711m/z	TR344_c17_g1	0.282315	0.373974
15.07_357.2992m/z	TR344_c17_g1	0.871588	0.0002208
15.17_265.2524m/z	TR344_c17_g1	0.874321	0.000199229
15.18_273.1307m/z	TR344_c17_g1	0.61238	0.034285
15.20_827.4928m/z	TR344_c17_g1	0.383874	0.217983
15.41_671.2710m/z	TR344_c17_g1	0.515084	0.0865769
15.41_683.2455m/z	TR344_c17_g1	0.510898	0.0896138
15.76_652.2898n	TR344_c17_g1	0.272175	0.392095
18.08_546.3906n	TR344_c17_g1	-0.894144	8.74241e-05
3.73_482.1745m/z	TR344_c17_g1	0.849475	0.000470019
3.79_448.1942m/z	TR344_c17_g1	0.889798	0.000106102
4.10_229.0858m/z	TR344_c17_g1	0.850157	0.000460022
4.16_257.1382m/z	TR344_c17_g1	-0.893851	8.85934e-05
4.16_441.1731m/z	TR344_c17_g1	-0.895031	8.39494e-05
4.43_281.1029m/z	TR344_c17_g1	0.759904	0.00413047
5.20_553.1925m/z	TR344_c17_g1	-0.242986	0.446669
6.05_501.3218m/z	TR344_c17_g1	-0.391872	0.20773
6.80_599.1983m/z	TR344_c17_g1	-0.330776	0.293635
10.83_945.7187m/z	TR3693_c3_g1	-0.392289	0.207204
10.84_929.5126m/z	TR3693_c3_g1	-0.388617	0.211867
13.83_703.2256m/z	TR3693_c3_g1	0.27068	0.394804
13.83_719.2211m/z	TR3693_c3_g1	0.262863	0.409122
13.83_721.2324m/z	TR3693_c3_g1	0.300606	0.342417
14.16_409.1882m/z	TR3693_c3_g1	0.957347	1.0348e-06
14.26_243.2106m/z	TR3693_c3_g1	0.866824	0.000262708
14.26_261.2211m/z	TR3693_c3_g1	0.868897	0.00024377
14.26_335.2582m/z	TR3693_c3_g1	0.876512	0.000183162
14.26_349.1982m/z	TR3693_c3_g1	0.851816	0.00043639
14.26_353.2683m/z	TR3693_c3_g1	0.872739	0.000211499
14.60_263.2367m/z	TR3693_c3_g1	0.967112	2.86725e-07
14.60_355.2832m/z	TR3693_c3_g1	0.964204	4.35875e-07
14.70_245.2261m/z	TR3693_c3_g1	0.917503	2.61683e-05
14.70_337.2735m/z	TR3693_c3_g1	0.9135	3.29361e-05
14.70_354.2764n	TR3693_c3_g1	0.896995	7.66462e-05
14.70_653.2608m/z	TR3693_c3_g1	0.621166	0.0310982
14.71_309.1671m/z	TR3693_c3_g1	0.927378	1.40699e-05
15.11_429.1946m/z	TR3693_c3_g1	0.93884	6.07841e-06
15.37_365.2684m/z	TR3693_c3_g1	0.910746	3.83402e-05
15.42_293.2473m/z	TR3693_c3_g1	0.940288	5.40557e-06
15.46_713.2560m/z	TR3693_c3_g1	0.356748	0.254988
15.58_567.4195m/z	TR3693_c3_g1	0.256502	0.420961
15.75_295.2630m/z	TR3693_c3_g1	0.97281	1.11817e-07
4.57_323.1246m/z	TR3693_c3_g1	0.954614	1.40508e-06
0.66_199.0009m/z	TR3693_c3_g1	0.893381	9.05004e-05
0.77_606.0743m/z	TR3693_c3_g1	0.262839	0.409166
0.94_129.0192m/z	TR3693_c3_g1	0.771253	0.00331027
0.95_130.9984m/z	TR3693_c3_g1	0.797362	0.00189348
0.95_87.0086m/z	TR3693_c3_g1	0.810902	0.00137298
1.12_111.0086m/z	TR3693_c3_g1	0.743379	0.00558917
13.35_689.2099m/z	TR3693_c3_g1	0.218577	0.49492
15.00_609.2711m/z	TR3693_c3_g1	0.16127	0.616568
15.07_357.2992m/z	TR3693_c3_g1	0.867164	0.000259517
15.17_265.2524m/z	TR3693_c3_g1	0.875981	0.000186955
15.18_273.1307m/z	TR3693_c3_g1	0.497954	0.0994561
15.20_827.4928m/z	TR3693_c3_g1	0.249921	0.433386
15.41_671.2710m/z	TR3693_c3_g1	0.41459	0.180238
15.41_683.2455m/z	TR3693_c3_g1	0.411015	0.184404
15.76_652.2898n	TR3693_c3_g1	0.147995	0.646222
18.08_546.3906n	TR3693_c3_g1	-0.870902	0.000226487
3.73_482.1745m/z	TR3693_c3_g1	0.808278	0.00146403
3.79_448.1942m/z	TR3693_c3_g1	0.857068	0.000367728
4.10_229.0858m/z	TR3693_c3_g1	0.886017	0.00012477
4.16_257.1382m/z	TR3693_c3_g1	-0.867048	0.000260607
4.16_441.1731m/z	TR3693_c3_g1	-0.870963	0.000225971
4.43_281.1029m/z	TR3693_c3_g1	0.819786	0.00109669
5.20_553.1925m/z	TR3693_c3_g1	-0.382756	0.219441
6.05_501.3218m/z	TR3693_c3_g1	-0.51556	0.0862362
6.80_599.1983m/z	TR3693_c3_g1	-0.161976	0.615006
10.83_945.7187m/z	TR38520_c0_g2	-0.571696	0.0521349
10.84_929.5126m/z	TR38520_c0_g2	-0.573803	0.051078
13.83_703.2256m/z	TR38520_c0_g2	0.465097	0.127617
13.83_719.2211m/z	TR38520_c0_g2	0.447968	0.144168
13.83_721.2324m/z	TR38520_c0_g2	0.478592	0.115489
14.16_409.1882m/z	TR38520_c0_g2	0.972978	1.08436e-07
14.26_243.2106m/z	TR38520_c0_g2	0.909523	4.09555e-05
14.26_261.2211m/z	TR38520_c0_g2	0.912261	3.52871e-05
14.26_335.2582m/z	TR38520_c0_g2	0.918362	2.48705e-05
14.26_349.1982m/z	TR38520_c0_g2	0.888628	0.000111628
14.26_353.2683m/z	TR38520_c0_g2	0.910405	3.90568e-05
14.60_263.2367m/z	TR38520_c0_g2	0.944787	3.68193e-06
14.60_355.2832m/z	TR38520_c0_g2	0.943055	4.28398e-06
14.70_245.2261m/z	TR38520_c0_g2	0.896808	7.73198e-05
14.70_337.2735m/z	TR38520_c0_g2	0.896572	7.81734e-05
14.70_354.2764n	TR38520_c0_g2	0.880668	0.000155467
14.70_653.2608m/z	TR38520_c0_g2	0.767761	0.00354806
14.71_309.1671m/z	TR38520_c0_g2	0.902858	5.77625e-05
15.11_429.1946m/z	TR38520_c0_g2	0.949356	2.40926e-06
15.37_365.2684m/z	TR38520_c0_g2	0.936631	7.23097e-06
15.42_293.2473m/z	TR38520_c0_g2	0.973406	1.00183e-07
15.46_713.2560m/z	TR38520_c0_g2	0.543488	0.0677977
15.58_567.4195m/z	TR38520_c0_g2	0.447378	0.144762
15.75_295.2630m/z	TR38520_c0_g2	0.958475	9.06829e-07
4.57_323.1246m/z	TR38520_c0_g2	0.964279	4.31369e-07
0.66_199.0009m/z	TR38520_c0_g2	0.895116	8.36248e-05
0.77_606.0743m/z	TR38520_c0_g2	0.451431	0.140716
0.94_129.0192m/z	TR38520_c0_g2	0.887634	0.000116494
0.95_130.9984m/z	TR38520_c0_g2	0.879951	0.000159995
0.95_87.0086m/z	TR38520_c0_g2	0.908197	4.39438e-05
1.12_111.0086m/z	TR38520_c0_g2	0.865973	0.000270797
13.35_689.2099m/z	TR38520_c0_g2	0.407196	0.188921
15.00_609.2711m/z	TR38520_c0_g2	0.356114	0.255895
15.07_357.2992m/z	TR38520_c0_g2	0.852877	0.000421776
15.17_265.2524m/z	TR38520_c0_g2	0.857614	0.000361106
15.18_273.1307m/z	TR38520_c0_g2	0.677165	0.0155606
15.20_827.4928m/z	TR38520_c0_g2	0.437609	0.154817
15.41_671.2710m/z	TR38520_c0_g2	0.566871	0.0546132
15.41_683.2455m/z	TR38520_c0_g2	0.570451	0.052767
15.76_652.2898n	TR38520_c0_g2	0.333936	0.288767
18.08_546.3906n	TR38520_c0_g2	-0.899587	6.77802e-05
3.73_482.1745m/z	TR38520_c0_g2	0.868104	0.000250882
3.79_448.1942m/z	TR38520_c0_g2	0.885514	0.000127433
4.10_229.0858m/z	TR38520_c0_g2	0.815808	0.00121453
4.16_257.1382m/z	TR38520_c0_g2	-0.916912	2.70912e-05
4.16_441.1731m/z	TR38520_c0_g2	-0.895373	8.26424e-05
4.43_281.1029m/z	TR38520_c0_g2	0.716019	0.00881638
5.20_553.1925m/z	TR38520_c0_g2	-0.176255	0.58372
6.05_501.3218m/z	TR38520_c0_g2	-0.332048	0.29167
6.80_599.1983m/z	TR38520_c0_g2	-0.381129	0.221571
10.83_945.7187m/z	TR39562_c1_g1	-0.374845	0.229918
10.84_929.5126m/z	TR39562_c1_g1	-0.375996	0.228375
13.83_703.2256m/z	TR39562_c1_g1	0.232013	0.468076
13.83_719.2211m/z	TR39562_c1_g1	0.211456	0.509421
13.83_721.2324m/z	TR39562_c1_g1	0.246889	0.43917
14.16_409.1882m/z	TR39562_c1_g1	0.93991	5.57512e-06
14.26_243.2106m/z	TR39562_c1_g1	0.847413	0.000501269
14.26_261.2211m/z	TR39562_c1_g1	0.850231	0.000458944
14.26_335.2582m/z	TR39562_c1_g1	0.856751	0.000371624
14.26_349.1982m/z	TR39562_c1_g1	0.828735	0.000863815
14.26_353.2683m/z	TR39562_c1_g1	0.85346	0.000413902
14.60_263.2367m/z	TR39562_c1_g1	0.946201	3.24182e-06
14.60_355.2832m/z	TR39562_c1_g1	0.945704	3.39145e-06
14.70_245.2261m/z	TR39562_c1_g1	0.896818	7.72813e-05
14.70_337.2735m/z	TR39562_c1_g1	0.892188	9.54799e-05
14.70_354.2764n	TR39562_c1_g1	0.874452	0.000198239
14.70_653.2608m/z	TR39562_c1_g1	0.587147	0.0447297
14.71_309.1671m/z	TR39562_c1_g1	0.901687	6.12029e-05
15.11_429.1946m/z	TR39562_c1_g1	0.918464	2.47195e-05
15.37_365.2684m/z	TR39562_c1_g1	0.911405	3.69884e-05
15.42_293.2473m/z	TR39562_c1_g1	0.92155	2.04908e-05
15.46_713.2560m/z	TR39562_c1_g1	0.324351	0.303677
15.58_567.4195m/z	TR39562_c1_g1	0.220719	0.490595
15.75_295.2630m/z	TR39562_c1_g1	0.948178	2.69726e-06
4.57_323.1246m/z	TR39562_c1_g1	0.972865	1.10707e-07
0.66_199.0009m/z	TR39562_c1_g1	0.87353	0.000205293
0.77_606.0743m/z	TR39562_c1_g1	0.21556	0.501042
0.94_129.0192m/z	TR39562_c1_g1	0.792501	0.00211312
0.95_130.9984m/z	TR39562_c1_g1	0.814485	0.00125579
0.95_87.0086m/z	TR39562_c1_g1	0.837715	0.000670525
1.12_111.0086m/z	TR39562_c1_g1	0.772182	0.00324911
13.35_689.2099m/z	TR39562_c1_g1	0.173826	0.588997
15.00_609.2711m/z	TR39562_c1_g1	0.111503	0.730096
15.07_357.2992m/z	TR39562_c1_g1	0.860069	0.000332473
15.17_265.2524m/z	TR39562_c1_g1	0.856287	0.000377374
15.18_273.1307m/z	TR39562_c1_g1	0.476016	0.117743
15.20_827.4928m/z	TR39562_c1_g1	0.209623	0.513184
15.41_671.2710m/z	TR39562_c1_g1	0.367214	0.240303
15.41_683.2455m/z	TR39562_c1_g1	0.370221	0.236178
15.76_652.2898n	TR39562_c1_g1	0.0976265	0.762774
18.08_546.3906n	TR39562_c1_g1	-0.874181	0.000200293
3.73_482.1745m/z	TR39562_c1_g1	0.785196	0.00247919
3.79_448.1942m/z	TR39562_c1_g1	0.89041	0.000103298
4.10_229.0858m/z	TR39562_c1_g1	0.87956	0.000162507
4.16_257.1382m/z	TR39562_c1_g1	-0.836482	0.000694857
4.16_441.1731m/z	TR39562_c1_g1	-0.862148	0.000309623
4.43_281.1029m/z	TR39562_c1_g1	0.829166	0.000853662
5.20_553.1925m/z	TR39562_c1_g1	-0.402481	0.194592
6.05_501.3218m/z	TR39562_c1_g1	-0.543296	0.0679141
6.80_599.1983m/z	TR39562_c1_g1	-0.189489	0.555296
10.83_945.7187m/z	TR43_c0_g1	-0.53962	0.0701724
10.84_929.5126m/z	TR43_c0_g1	-0.531186	0.0755467
13.83_703.2256m/z	TR43_c0_g1	0.412059	0.183181
13.83_719.2211m/z	TR43_c0_g1	0.398033	0.200036
13.83_721.2324m/z	TR43_c0_g1	0.435558	0.156984
14.16_409.1882m/z	TR43_c0_g1	0.983533	9.27697e-09
14.26_243.2106m/z	TR43_c0_g1	0.910271	3.93401e-05
14.26_261.2211m/z	TR43_c0_g1	0.911488	3.68198e-05
14.26_335.2582m/z	TR43_c0_g1	0.918934	2.40353e-05
14.26_349.1982m/z	TR43_c0_g1	0.887998	0.000114693
14.26_353.2683m/z	TR43_c0_g1	0.912263	3.52847e-05
14.60_263.2367m/z	TR43_c0_g1	0.966128	3.31735e-07
14.60_355.2832m/z	TR43_c0_g1	0.964779	4.02359e-07
14.70_245.2261m/z	TR43_c0_g1	0.916925	2.70709e-05
14.70_337.2735m/z	TR43_c0_g1	0.917193	2.66487e-05
14.70_354.2764n	TR43_c0_g1	0.904065	5.4374e-05
14.70_653.2608m/z	TR43_c0_g1	0.735787	0.00637628
14.71_309.1671m/z	TR43_c0_g1	0.920214	2.22449e-05
15.11_429.1946m/z	TR43_c0_g1	0.961774	6.02801e-07
15.37_365.2684m/z	TR43_c0_g1	0.924488	1.70168e-05
15.42_293.2473m/z	TR43_c0_g1	0.974329	8.40952e-08
15.46_713.2560m/z	TR43_c0_g1	0.489273	0.106448
15.58_567.4195m/z	TR43_c0_g1	0.401467	0.195824
15.75_295.2630m/z	TR43_c0_g1	0.975802	6.27418e-08
4.57_323.1246m/z	TR43_c0_g1	0.958709	8.81827e-07
0.66_199.0009m/z	TR43_c0_g1	0.899565	6.78506e-05
0.77_606.0743m/z	TR43_c0_g1	0.393434	0.205763
0.94_129.0192m/z	TR43_c0_g1	0.844139	0.000554191
0.95_130.9984m/z	TR43_c0_g1	0.843637	0.000562668
0.95_87.0086m/z	TR43_c0_g1	0.869952	0.000234555
1.12_111.0086m/z	TR43_c0_g1	0.821865	0.00103874
13.35_689.2099m/z	TR43_c0_g1	0.356724	0.255022
15.00_609.2711m/z	TR43_c0_g1	0.30392	0.336857
15.07_357.2992m/z	TR43_c0_g1	0.872803	0.000210992
15.17_265.2524m/z	TR43_c0_g1	0.875906	0.000187498
15.18_273.1307m/z	TR43_c0_g1	0.625704	0.0295381
15.20_827.4928m/z	TR43_c0_g1	0.38671	0.214314
15.41_671.2710m/z	TR43_c0_g1	0.534808	0.0732053
15.41_683.2455m/z	TR43_c0_g1	0.531788	0.0751542
15.76_652.2898n	TR43_c0_g1	0.2849	0.369425
18.08_546.3906n	TR43_c0_g1	-0.888966	0.000110006
3.73_482.1745m/z	TR43_c0_g1	0.881907	0.000147883
3.79_448.1942m/z	TR43_c0_g1	0.868002	0.000251811
4.10_229.0858m/z	TR43_c0_g1	0.869865	0.000235296
4.16_257.1382m/z	TR43_c0_g1	-0.901818	6.08116e-05
4.16_441.1731m/z	TR43_c0_g1	-0.889162	0.000109074
4.43_281.1029m/z	TR43_c0_g1	0.77496	0.00307125
5.20_553.1925m/z	TR43_c0_g1	-0.242672	0.447275
6.05_501.3218m/z	TR43_c0_g1	-0.3916	0.208074
6.80_599.1983m/z	TR43_c0_g1	-0.32901	0.296377
10.83_945.7187m/z	TR43400_c0_g1	-0.637616	0.0257124
10.84_929.5126m/z	TR43400_c0_g1	-0.639597	0.025113
13.83_703.2256m/z	TR43400_c0_g1	0.532545	0.0746623
13.83_719.2211m/z	TR43400_c0_g1	0.513497	0.0877198
13.83_721.2324m/z	TR43400_c0_g1	0.544585	0.0671347
14.16_409.1882m/z	TR43400_c0_g1	0.979737	2.60065e-08
14.26_243.2106m/z	TR43400_c0_g1	0.938009	6.49383e-06
14.26_261.2211m/z	TR43400_c0_g1	0.938178	6.40737e-06
14.26_335.2582m/z	TR43400_c0_g1	0.945551	3.43855e-06
14.26_349.1982m/z	TR43400_c0_g1	0.916974	2.69931e-05
14.26_353.2683m/z	TR43400_c0_g1	0.937641	6.68471e-06
14.60_263.2367m/z	TR43400_c0_g1	0.945993	3.30376e-06
14.60_355.2832m/z	TR43400_c0_g1	0.940945	5.12022e-06
14.70_245.2261m/z	TR43400_c0_g1	0.910946	3.79272e-05
14.70_337.2735m/z	TR43400_c0_g1	0.914248	3.15775e-05
14.70_354.2764n	TR43400_c0_g1	0.903246	5.66551e-05
14.70_653.2608m/z	TR43400_c0_g1	0.811656	0.00134767
14.71_309.1671m/z	TR43400_c0_g1	0.915248	2.98302e-05
15.11_429.1946m/z	TR43400_c0_g1	0.967724	2.61313e-07
15.37_365.2684m/z	TR43400_c0_g1	0.931134	1.08585e-05
15.42_293.2473m/z	TR43400_c0_g1	0.981347	1.72357e-08
15.46_713.2560m/z	TR43400_c0_g1	0.606701	0.0364652
15.58_567.4195m/z	TR43400_c0_g1	0.5261	0.0789204
15.75_295.2630m/z	TR43400_c0_g1	0.960063	7.48191e-07
4.57_323.1246m/z	TR43400_c0_g1	0.954756	1.38363e-06
0.66_199.0009m/z	TR43400_c0_g1	0.87109	0.000224914
0.77_606.0743m/z	TR43400_c0_g1	0.504933	0.0940641
0.94_129.0192m/z	TR43400_c0_g1	0.879174	0.000165014
0.95_130.9984m/z	TR43400_c0_g1	0.848794	0.000480169
0.95_87.0086m/z	TR43400_c0_g1	0.888964	0.000110014
1.12_111.0086m/z	TR43400_c0_g1	0.847188	0.000504778
13.35_689.2099m/z	TR43400_c0_g1	0.48184	0.112688
15.00_609.2711m/z	TR43400_c0_g1	0.421132	0.172764
15.07_357.2992m/z	TR43400_c0_g1	0.870061	0.000233616
15.17_265.2524m/z	TR43400_c0_g1	0.877893	0.00017356
15.18_273.1307m/z	TR43400_c0_g1	0.694508	0.0121997
15.20_827.4928m/z	TR43400_c0_g1	0.513351	0.0878257
15.41_671.2710m/z	TR43400_c0_g1	0.627204	0.0290351
15.41_683.2455m/z	TR43400_c0_g1	0.623661	0.0302332
15.76_652.2898n	TR43400_c0_g1	0.411095	0.18431
18.08_546.3906n	TR43400_c0_g1	-0.888768	0.000110953
3.73_482.1745m/z	TR43400_c0_g1	0.895702	8.13973e-05
3.79_448.1942m/z	TR43400_c0_g1	0.843512	0.000564789
4.10_229.0858m/z	TR43400_c0_g1	0.819815	0.00109589
4.16_257.1382m/z	TR43400_c0_g1	-0.893078	9.1745e-05
4.16_441.1731m/z	TR43400_c0_g1	-0.885585	0.000127058
4.43_281.1029m/z	TR43400_c0_g1	0.700111	0.0112388
5.20_553.1925m/z	TR43400_c0_g1	-0.111957	0.729033
6.05_501.3218m/z	TR43400_c0_g1	-0.256008	0.421888
6.80_599.1983m/z	TR43400_c0_g1	-0.443009	0.149205
10.83_945.7187m/z	TR43510_c0_g1	-0.475458	0.118234
10.84_929.5126m/z	TR43510_c0_g1	-0.474886	0.11874
13.83_703.2256m/z	TR43510_c0_g1	0.334357	0.288122
13.83_719.2211m/z	TR43510_c0_g1	0.309884	0.326976
13.83_721.2324m/z	TR43510_c0_g1	0.344481	0.272851
14.16_409.1882m/z	TR43510_c0_g1	0.963996	4.48521e-07
14.26_243.2106m/z	TR43510_c0_g1	0.883365	0.000139328
14.26_261.2211m/z	TR43510_c0_g1	0.886541	0.000122038
14.26_335.2582m/z	TR43510_c0_g1	0.896287	7.92188e-05
14.26_349.1982m/z	TR43510_c0_g1	0.857304	0.000364863
14.26_353.2683m/z	TR43510_c0_g1	0.890612	0.000102382
14.60_263.2367m/z	TR43510_c0_g1	0.968174	2.43782e-07
14.60_355.2832m/z	TR43510_c0_g1	0.972474	1.18829e-07
14.70_245.2261m/z	TR43510_c0_g1	0.92883	1.275e-05
14.70_337.2735m/z	TR43510_c0_g1	0.929306	1.23396e-05
14.70_354.2764n	TR43510_c0_g1	0.918069	2.53066e-05
14.70_653.2608m/z	TR43510_c0_g1	0.672228	0.0166309
14.71_309.1671m/z	TR43510_c0_g1	0.920609	2.17145e-05
15.11_429.1946m/z	TR43510_c0_g1	0.965924	3.41739e-07
15.37_365.2684m/z	TR43510_c0_g1	0.889312	0.000108368
15.42_293.2473m/z	TR43510_c0_g1	0.939427	5.79805e-06
15.46_713.2560m/z	TR43510_c0_g1	0.428729	0.164335
15.58_567.4195m/z	TR43510_c0_g1	0.338414	0.281946
15.75_295.2630m/z	TR43510_c0_g1	0.965873	3.44257e-07
4.57_323.1246m/z	TR43510_c0_g1	0.962036	5.82688e-07
0.66_199.0009m/z	TR43510_c0_g1	0.860819	0.000324075
0.77_606.0743m/z	TR43510_c0_g1	0.289712	0.361035
0.94_129.0192m/z	TR43510_c0_g1	0.779549	0.00279383
0.95_130.9984m/z	TR43510_c0_g1	0.767017	0.00360037
0.95_87.0086m/z	TR43510_c0_g1	0.812193	0.00132983
1.12_111.0086m/z	TR43510_c0_g1	0.750955	0.00487905
13.35_689.2099m/z	TR43510_c0_g1	0.28803	0.363957
15.00_609.2711m/z	TR43510_c0_g1	0.232198	0.46771
15.07_357.2992m/z	TR43510_c0_g1	0.921538	2.05061e-05
15.17_265.2524m/z	TR43510_c0_g1	0.916798	2.72728e-05
15.18_273.1307m/z	TR43510_c0_g1	0.526056	0.0789502
15.20_827.4928m/z	TR43510_c0_g1	0.319123	0.311987
15.41_671.2710m/z	TR43510_c0_g1	0.488837	0.106807
15.41_683.2455m/z	TR43510_c0_g1	0.485519	0.10957
15.76_652.2898n	TR43510_c0_g1	0.220151	0.491741
18.08_546.3906n	TR43510_c0_g1	-0.872692	0.000211878
3.73_482.1745m/z	TR43510_c0_g1	0.862269	0.000308337
3.79_448.1942m/z	TR43510_c0_g1	0.825083	0.000953712
4.10_229.0858m/z	TR43510_c0_g1	0.908851	4.24486e-05
4.16_257.1382m/z	TR43510_c0_g1	-0.840743	0.000613549
4.16_441.1731m/z	TR43510_c0_g1	-0.873286	0.000207195
4.43_281.1029m/z	TR43510_c0_g1	0.830926	0.000813137
5.20_553.1925m/z	TR43510_c0_g1	-0.321332	0.30846
6.05_501.3218m/z	TR43510_c0_g1	-0.44367	0.148528
6.80_599.1983m/z	TR43510_c0_g1	-0.271734	0.392892
10.83_945.7187m/z	TR45025_c0_g1	-0.455875	0.136365
10.84_929.5126m/z	TR45025_c0_g1	-0.475163	0.118495
13.83_703.2256m/z	TR45025_c0_g1	0.348001	0.267655
13.83_719.2211m/z	TR45025_c0_g1	0.326597	0.300145
13.83_721.2324m/z	TR45025_c0_g1	0.359678	0.250825
14.16_409.1882m/z	TR45025_c0_g1	0.950927	2.0636e-06
14.26_243.2106m/z	TR45025_c0_g1	0.859381	0.000340305
14.26_261.2211m/z	TR45025_c0_g1	0.864444	0.000285833
14.26_335.2582m/z	TR45025_c0_g1	0.875974	0.000187009
14.26_349.1982m/z	TR45025_c0_g1	0.834599	0.000733351
14.26_353.2683m/z	TR45025_c0_g1	0.86674	0.000263495
14.60_263.2367m/z	TR45025_c0_g1	0.947003	3.01127e-06
14.60_355.2832m/z	TR45025_c0_g1	0.954451	1.43017e-06
14.70_245.2261m/z	TR45025_c0_g1	0.894641	8.54652e-05
14.70_337.2735m/z	TR45025_c0_g1	0.893647	8.94183e-05
14.70_354.2764n	TR45025_c0_g1	0.874895	0.00019492
14.70_653.2608m/z	TR45025_c0_g1	0.681747	0.0146134
14.71_309.1671m/z	TR45025_c0_g1	0.895027	8.39647e-05
15.11_429.1946m/z	TR45025_c0_g1	0.946947	3.0271e-06
15.37_365.2684m/z	TR45025_c0_g1	0.914387	3.13297e-05
15.42_293.2473m/z	TR45025_c0_g1	0.930623	1.12577e-05
15.46_713.2560m/z	TR45025_c0_g1	0.441042	0.151234
15.58_567.4195m/z	TR45025_c0_g1	0.337651	0.283101
15.75_295.2630m/z	TR45025_c0_g1	0.954268	1.45863e-06
4.57_323.1246m/z	TR45025_c0_g1	0.977097	4.7763e-08
0.66_199.0009m/z	TR45025_c0_g1	0.871211	0.000223907
0.77_606.0743m/z	TR45025_c0_g1	0.323966	0.304285
0.94_129.0192m/z	TR45025_c0_g1	0.817773	0.00115517
0.95_130.9984m/z	TR45025_c0_g1	0.813052	0.00130171
0.95_87.0086m/z	TR45025_c0_g1	0.848451	0.000485337
1.12_111.0086m/z	TR45025_c0_g1	0.782754	0.00261174
13.35_689.2099m/z	TR45025_c0_g1	0.293194	0.355028
15.00_609.2711m/z	TR45025_c0_g1	0.2492	0.434759
15.07_357.2992m/z	TR45025_c0_g1	0.900983	6.33494e-05
15.17_265.2524m/z	TR45025_c0_g1	0.89694	7.68422e-05
15.18_273.1307m/z	TR45025_c0_g1	0.56234	0.057015
15.20_827.4928m/z	TR45025_c0_g1	0.3224	0.306763
15.41_671.2710m/z	TR45025_c0_g1	0.483955	0.110889
15.41_683.2455m/z	TR45025_c0_g1	0.486705	0.108577
15.76_652.2898n	TR45025_c0_g1	0.223911	0.484182
18.08_546.3906n	TR45025_c0_g1	-0.892722	9.32232e-05
3.73_482.1745m/z	TR45025_c0_g1	0.853058	0.000419317
3.79_448.1942m/z	TR45025_c0_g1	0.858752	0.000347604
4.10_229.0858m/z	TR45025_c0_g1	0.853481	0.000413621
4.16_257.1382m/z	TR45025_c0_g1	-0.880807	0.000154604
4.16_441.1731m/z	TR45025_c0_g1	-0.904687	5.26925e-05
4.43_281.1029m/z	TR45025_c0_g1	0.776029	0.00300487
5.20_553.1925m/z	TR45025_c0_g1	-0.284307	0.370467
6.05_501.3218m/z	TR45025_c0_g1	-0.441308	0.150959
6.80_599.1983m/z	TR45025_c0_g1	-0.253662	0.426302
10.83_945.7187m/z	TR4508_c0_g1	-0.535425	0.0728114
10.84_929.5126m/z	TR4508_c0_g1	-0.543352	0.0678804
13.83_703.2256m/z	TR4508_c0_g1	0.41399	0.180932
13.83_719.2211m/z	TR4508_c0_g1	0.402145	0.195
13.83_721.2324m/z	TR4508_c0_g1	0.43088	0.161997
14.16_409.1882m/z	TR4508_c0_g1	0.97276	1.12841e-07
14.26_243.2106m/z	TR4508_c0_g1	0.895318	8.28515e-05
14.26_261.2211m/z	TR4508_c0_g1	0.899245	6.88998e-05
14.26_335.2582m/z	TR4508_c0_g1	0.90333	5.64181e-05
14.26_349.1982m/z	TR4508_c0_g1	0.852552	0.000426203
14.26_353.2683m/z	TR4508_c0_g1	0.897233	7.57957e-05
14.60_263.2367m/z	TR4508_c0_g1	0.971047	1.5262e-07
14.60_355.2832m/z	TR4508_c0_g1	0.97599	6.03547e-08
14.70_245.2261m/z	TR4508_c0_g1	0.920066	2.2447e-05
14.70_337.2735m/z	TR4508_c0_g1	0.917892	2.55743e-05
14.70_354.2764n	TR4508_c0_g1	0.908203	4.39292e-05
14.70_653.2608m/z	TR4508_c0_g1	0.732729	0.00671577
14.71_309.1671m/z	TR4508_c0_g1	0.904267	5.38248e-05
15.11_429.1946m/z	TR4508_c0_g1	0.95394	1.51082e-06
15.37_365.2684m/z	TR4508_c0_g1	0.904591	5.29496e-05
15.42_293.2473m/z	TR4508_c0_g1	0.950117	2.23636e-06
15.46_713.2560m/z	TR4508_c0_g1	0.501961	0.0963356
15.58_567.4195m/z	TR4508_c0_g1	0.395757	0.202858
15.75_295.2630m/z	TR4508_c0_g1	0.968248	2.40989e-07
4.57_323.1246m/z	TR4508_c0_g1	0.955266	1.30857e-06
0.66_199.0009m/z	TR4508_c0_g1	0.863376	0.000296718
0.77_606.0743m/z	TR4508_c0_g1	0.390339	0.209672
0.94_129.0192m/z	TR4508_c0_g1	0.831973	0.000789748
0.95_130.9984m/z	TR4508_c0_g1	0.829828	0.000838232
0.95_87.0086m/z	TR4508_c0_g1	0.858823	0.000346774
1.12_111.0086m/z	TR4508_c0_g1	0.804934	0.00158668
13.35_689.2099m/z	TR4508_c0_g1	0.370064	0.236392
15.00_609.2711m/z	TR4508_c0_g1	0.312124	0.323307
15.07_357.2992m/z	TR4508_c0_g1	0.898495	7.14123e-05
15.17_265.2524m/z	TR4508_c0_g1	0.894873	8.45593e-05
15.18_273.1307m/z	TR4508_c0_g1	0.627055	0.0290849
15.20_827.4928m/z	TR4508_c0_g1	0.394414	0.204534
15.41_671.2710m/z	TR4508_c0_g1	0.563769	0.0562497
15.41_683.2455m/z	TR4508_c0_g1	0.558008	0.0593785
15.76_652.2898n	TR4508_c0_g1	0.296066	0.350112
18.08_546.3906n	TR4508_c0_g1	-0.913409	3.31047e-05
3.73_482.1745m/z	TR4508_c0_g1	0.858504	0.000350511
3.79_448.1942m/z	TR4508_c0_g1	0.860023	0.000332993
4.10_229.0858m/z	TR4508_c0_g1	0.849196	0.000474144
4.16_257.1382m/z	TR4508_c0_g1	-0.899067	6.94891e-05
4.16_441.1731m/z	TR4508_c0_g1	-0.876279	0.000184821
4.43_281.1029m/z	TR4508_c0_g1	0.752061	0.00478134
5.20_553.1925m/z	TR4508_c0_g1	-0.228747	0.474538
6.05_501.3218m/z	TR4508_c0_g1	-0.364747	0.243719
6.80_599.1983m/z	TR4508_c0_g1	-0.330274	0.294414
10.83_945.7187m/z	TR48354_c0_g1	-0.539156	0.0704606
10.84_929.5126m/z	TR48354_c0_g1	-0.539898	0.0699995
13.83_703.2256m/z	TR48354_c0_g1	0.421134	0.172762
13.83_719.2211m/z	TR48354_c0_g1	0.402712	0.194312
13.83_721.2324m/z	TR48354_c0_g1	0.438537	0.153844
14.16_409.1882m/z	TR48354_c0_g1	0.975902	6.14662e-08
14.26_243.2106m/z	TR48354_c0_g1	0.9101	3.97054e-05
14.26_261.2211m/z	TR48354_c0_g1	0.910578	3.86924e-05
14.26_335.2582m/z	TR48354_c0_g1	0.91657	2.76378e-05
14.26_349.1982m/z	TR48354_c0_g1	0.891436	9.87248e-05
14.26_353.2683m/z	TR48354_c0_g1	0.910997	3.78217e-05
14.60_263.2367m/z	TR48354_c0_g1	0.953523	1.5795e-06
14.60_355.2832m/z	TR48354_c0_g1	0.949615	2.3492e-06
14.70_245.2261m/z	TR48354_c0_g1	0.907039	4.66929e-05
14.70_337.2735m/z	TR48354_c0_g1	0.906484	4.80582e-05
14.70_354.2764n	TR48354_c0_g1	0.890772	0.000101664
14.70_653.2608m/z	TR48354_c0_g1	0.73596	0.00635739
14.71_309.1671m/z	TR48354_c0_g1	0.916346	2.7999e-05
15.11_429.1946m/z	TR48354_c0_g1	0.953949	1.50943e-06
15.37_365.2684m/z	TR48354_c0_g1	0.938596	6.19813e-06
15.42_293.2473m/z	TR48354_c0_g1	0.973273	1.02697e-07
15.46_713.2560m/z	TR48354_c0_g1	0.499394	0.0983275
15.58_567.4195m/z	TR48354_c0_g1	0.408816	0.186996
15.75_295.2630m/z	TR48354_c0_g1	0.966792	3.00812e-07
4.57_323.1246m/z	TR48354_c0_g1	0.972787	1.12279e-07
0.66_199.0009m/z	TR48354_c0_g1	0.894742	8.50681e-05
0.77_606.0743m/z	TR48354_c0_g1	0.405207	0.191301
0.94_129.0192m/z	TR48354_c0_g1	0.867479	0.000256601
0.95_130.9984m/z	TR48354_c0_g1	0.86386	0.000291748
0.95_87.0086m/z	TR48354_c0_g1	0.891379	9.89744e-05
1.12_111.0086m/z	TR48354_c0_g1	0.842972	0.000574058
13.35_689.2099m/z	TR48354_c0_g1	0.361657	0.248036
15.00_609.2711m/z	TR48354_c0_g1	0.303318	0.337864
15.07_357.2992m/z	TR48354_c0_g1	0.861367	0.000318057
15.17_265.2524m/z	TR48354_c0_g1	0.864637	0.000283903
15.18_273.1307m/z	TR48354_c0_g1	0.630932	0.027812
15.20_827.4928m/z	TR48354_c0_g1	0.395251	0.203489
15.41_671.2710m/z	TR48354_c0_g1	0.52596	0.0790149
15.41_683.2455m/z	TR48354_c0_g1	0.526711	0.0785097
15.76_652.2898n	TR48354_c0_g1	0.288005	0.363999
18.08_546.3906n	TR48354_c0_g1	-0.89591	8.06154e-05
3.73_482.1745m/z	TR48354_c0_g1	0.864468	0.000285593
3.79_448.1942m/z	TR48354_c0_g1	0.885337	0.000128386
4.10_229.0858m/z	TR48354_c0_g1	0.845098	0.000538261
4.16_257.1382m/z	TR48354_c0_g1	-0.898456	7.15425e-05
4.16_441.1731m/z	TR48354_c0_g1	-0.895233	8.31746e-05
4.43_281.1029m/z	TR48354_c0_g1	0.750903	0.00488361
5.20_553.1925m/z	TR48354_c0_g1	-0.22458	0.482842
6.05_501.3218m/z	TR48354_c0_g1	-0.379815	0.223302
6.80_599.1983m/z	TR48354_c0_g1	-0.344887	0.27225
10.83_945.7187m/z	TR49665_c0_g1	-0.553085	0.0621467
10.84_929.5126m/z	TR49665_c0_g1	-0.553642	0.061829
13.83_703.2256m/z	TR49665_c0_g1	0.418686	0.175536
13.83_719.2211m/z	TR49665_c0_g1	0.400967	0.196435
13.83_721.2324m/z	TR49665_c0_g1	0.428945	0.1641
14.16_409.1882m/z	TR49665_c0_g1	0.972815	1.11709e-07
14.26_243.2106m/z	TR49665_c0_g1	0.905941	4.94233e-05
14.26_261.2211m/z	TR49665_c0_g1	0.909714	4.05373e-05
14.26_335.2582m/z	TR49665_c0_g1	0.917177	2.66747e-05
14.26_349.1982m/z	TR49665_c0_g1	0.862865	0.000302039
14.26_353.2683m/z	TR49665_c0_g1	0.909171	4.17321e-05
14.60_263.2367m/z	TR49665_c0_g1	0.965874	3.44226e-07
14.60_355.2832m/z	TR49665_c0_g1	0.967408	2.7421e-07
14.70_245.2261m/z	TR49665_c0_g1	0.922148	1.97424e-05
14.70_337.2735m/z	TR49665_c0_g1	0.921718	2.02785e-05
14.70_354.2764n	TR49665_c0_g1	0.910808	3.82125e-05
14.70_653.2608m/z	TR49665_c0_g1	0.730436	0.0069791
14.71_309.1671m/z	TR49665_c0_g1	0.905742	4.99305e-05
15.11_429.1946m/z	TR49665_c0_g1	0.953645	1.55906e-06
15.37_365.2684m/z	TR49665_c0_g1	0.905419	5.07634e-05
15.42_293.2473m/z	TR49665_c0_g1	0.951382	1.97108e-06
15.46_713.2560m/z	TR49665_c0_g1	0.506084	0.0931942
15.58_567.4195m/z	TR49665_c0_g1	0.41051	0.184998
15.75_295.2630m/z	TR49665_c0_g1	0.962376	5.57389e-07
4.57_323.1246m/z	TR49665_c0_g1	0.958457	9.0877e-07
0.66_199.0009m/z	TR49665_c0_g1	0.872276	0.000215201
0.77_606.0743m/z	TR49665_c0_g1	0.402243	0.194881
0.94_129.0192m/z	TR49665_c0_g1	0.845445	0.000532587
0.95_130.9984m/z	TR49665_c0_g1	0.831153	0.000808027
0.95_87.0086m/z	TR49665_c0_g1	0.869061	0.00024232
1.12_111.0086m/z	TR49665_c0_g1	0.813219	0.00129628
13.35_689.2099m/z	TR49665_c0_g1	0.375764	0.228686
15.00_609.2711m/z	TR49665_c0_g1	0.315252	0.31822
15.07_357.2992m/z	TR49665_c0_g1	0.900452	6.50068e-05
15.17_265.2524m/z	TR49665_c0_g1	0.895265	8.30525e-05
15.18_273.1307m/z	TR49665_c0_g1	0.615762	0.0330317
15.20_827.4928m/z	TR49665_c0_g1	0.40569	0.190722
15.41_671.2710m/z	TR49665_c0_g1	0.555079	0.0610148
15.41_683.2455m/z	TR49665_c0_g1	0.545445	0.0666177
15.76_652.2898n	TR49665_c0_g1	0.296784	0.34889
18.08_546.3906n	TR49665_c0_g1	-0.887144	0.000118957
3.73_482.1745m/z	TR49665_c0_g1	0.863852	0.000291826
3.79_448.1942m/z	TR49665_c0_g1	0.862451	0.000306395
4.10_229.0858m/z	TR49665_c0_g1	0.853625	0.000411704
4.16_257.1382m/z	TR49665_c0_g1	-0.879201	0.00016484
4.16_441.1731m/z	TR49665_c0_g1	-0.877977	0.000172995
4.43_281.1029m/z	TR49665_c0_g1	0.763292	0.00387109
5.20_553.1925m/z	TR49665_c0_g1	-0.219408	0.49324
6.05_501.3218m/z	TR49665_c0_g1	-0.3604	0.249806
6.80_599.1983m/z	TR49665_c0_g1	-0.35779	0.253504
10.83_945.7187m/z	TR570_c0_g1	-0.601615	0.0385001
10.84_929.5126m/z	TR570_c0_g1	-0.602368	0.0381939
13.83_703.2256m/z	TR570_c0_g1	0.484231	0.110655
13.83_719.2211m/z	TR570_c0_g1	0.467416	0.125476
13.83_721.2324m/z	TR570_c0_g1	0.498001	0.0994191
14.16_409.1882m/z	TR570_c0_g1	0.977701	4.18288e-08
14.26_243.2106m/z	TR570_c0_g1	0.931765	1.03812e-05
14.26_261.2211m/z	TR570_c0_g1	0.93328	9.30274e-06
14.26_335.2582m/z	TR570_c0_g1	0.938785	6.10547e-06
14.26_349.1982m/z	TR570_c0_g1	0.906763	4.73676e-05
14.26_353.2683m/z	TR570_c0_g1	0.93152	1.05645e-05
14.60_263.2367m/z	TR570_c0_g1	0.944992	3.61519e-06
14.60_355.2832m/z	TR570_c0_g1	0.937117	6.96401e-06
14.70_245.2261m/z	TR570_c0_g1	0.906542	4.79124e-05
14.70_337.2735m/z	TR570_c0_g1	0.906842	4.71742e-05
14.70_354.2764n	TR570_c0_g1	0.891972	9.6402e-05
14.70_653.2608m/z	TR570_c0_g1	0.77137	0.0033025
14.71_309.1671m/z	TR570_c0_g1	0.911006	3.78026e-05
15.11_429.1946m/z	TR570_c0_g1	0.946691	3.09932e-06
15.37_365.2684m/z	TR570_c0_g1	0.951809	1.88736e-06
15.42_293.2473m/z	TR570_c0_g1	0.978516	3.47669e-08
15.46_713.2560m/z	TR570_c0_g1	0.55753	0.0596437
15.58_567.4195m/z	TR570_c0_g1	0.469475	0.123595
15.75_295.2630m/z	TR570_c0_g1	0.959161	8.35319e-07
4.57_323.1246m/z	TR570_c0_g1	0.968929	2.16469e-07
0.66_199.0009m/z	TR570_c0_g1	0.887984	0.000114763
0.77_606.0743m/z	TR570_c0_g1	0.480685	0.113679
0.94_129.0192m/z	TR570_c0_g1	0.904937	5.20268e-05
0.95_130.9984m/z	TR570_c0_g1	0.890315	0.000103729
0.95_87.0086m/z	TR570_c0_g1	0.920076	2.24327e-05
1.12_111.0086m/z	TR570_c0_g1	0.87241	0.000214129
13.35_689.2099m/z	TR570_c0_g1	0.429658	0.163322
15.00_609.2711m/z	TR570_c0_g1	0.359624	0.250902
15.07_357.2992m/z	TR570_c0_g1	0.849715	0.000466479
15.17_265.2524m/z	TR570_c0_g1	0.85534	0.000389316
15.18_273.1307m/z	TR570_c0_g1	0.675718	0.0158689
15.20_827.4928m/z	TR570_c0_g1	0.465381	0.127354
15.41_671.2710m/z	TR570_c0_g1	0.568036	0.0540078
15.41_683.2455m/z	TR570_c0_g1	0.562487	0.0569356
15.76_652.2898n	TR570_c0_g1	0.349002	0.266186
18.08_546.3906n	TR570_c0_g1	-0.890687	0.000102045
3.73_482.1745m/z	TR570_c0_g1	0.859254	0.000341777
3.79_448.1942m/z	TR570_c0_g1	0.896035	8.01523e-05
4.10_229.0858m/z	TR570_c0_g1	0.808733	0.0014479
4.16_257.1382m/z	TR570_c0_g1	-0.896969	7.67377e-05
4.16_441.1731m/z	TR570_c0_g1	-0.889604	0.000107003
4.43_281.1029m/z	TR570_c0_g1	0.705114	0.0104296
5.20_553.1925m/z	TR570_c0_g1	-0.149017	0.643921
6.05_501.3218m/z	TR570_c0_g1	-0.307358	0.331142
6.80_599.1983m/z	TR570_c0_g1	-0.418207	0.176081
10.83_945.7187m/z	TR6244_c0_g1	-0.6306	0.0279194
10.84_929.5126m/z	TR6244_c0_g1	-0.630332	0.0280061
13.83_703.2256m/z	TR6244_c0_g1	0.517647	0.0847522
13.83_719.2211m/z	TR6244_c0_g1	0.502296	0.0960777
13.83_721.2324m/z	TR6244_c0_g1	0.530638	0.0759052
14.16_409.1882m/z	TR6244_c0_g1	0.972149	1.25948e-07
14.26_243.2106m/z	TR6244_c0_g1	0.9258	1.56244e-05
14.26_261.2211m/z	TR6244_c0_g1	0.925242	1.62043e-05
14.26_335.2582m/z	TR6244_c0_g1	0.931707	1.04244e-05
14.26_349.1982m/z	TR6244_c0_g1	0.896391	7.88362e-05
14.26_353.2683m/z	TR6244_c0_g1	0.922058	1.98542e-05
14.60_263.2367m/z	TR6244_c0_g1	0.932714	9.6949e-06
14.60_355.2832m/z	TR6244_c0_g1	0.926677	1.47447e-05
14.70_245.2261m/z	TR6244_c0_g1	0.884593	0.000132434
14.70_337.2735m/z	TR6244_c0_g1	0.886094	0.000124366
14.70_354.2764n	TR6244_c0_g1	0.874473	0.000198079
14.70_653.2608m/z	TR6244_c0_g1	0.799352	0.00180877
14.71_309.1671m/z	TR6244_c0_g1	0.887185	0.000118749
15.11_429.1946m/z	TR6244_c0_g1	0.937621	6.69479e-06
15.37_365.2684m/z	TR6244_c0_g1	0.943619	4.08003e-06
15.42_293.2473m/z	TR6244_c0_g1	0.975311	6.93155e-08
15.46_713.2560m/z	TR6244_c0_g1	0.587717	0.0444718
15.58_567.4195m/z	TR6244_c0_g1	0.499617	0.0981529
15.75_295.2630m/z	TR6244_c0_g1	0.94446	3.79024e-06
4.57_323.1246m/z	TR6244_c0_g1	0.956885	1.09131e-06
0.66_199.0009m/z	TR6244_c0_g1	0.877794	0.000174237
0.77_606.0743m/z	TR6244_c0_g1	0.510465	0.0899315
0.94_129.0192m/z	TR6244_c0_g1	0.916396	2.79176e-05
0.95_130.9984m/z	TR6244_c0_g1	0.902509	5.87702e-05
0.95_87.0086m/z	TR6244_c0_g1	0.930974	1.09819e-05
1.12_111.0086m/z	TR6244_c0_g1	0.894008	8.79641e-05
13.35_689.2099m/z	TR6244_c0_g1	0.461895	0.130612
15.00_609.2711m/z	TR6244_c0_g1	0.401654	0.195597
15.07_357.2992m/z	TR6244_c0_g1	0.829235	0.000852059
15.17_265.2524m/z	TR6244_c0_g1	0.832315	0.000782209
15.18_273.1307m/z	TR6244_c0_g1	0.717925	0.00855485
15.20_827.4928m/z	TR6244_c0_g1	0.493064	0.103356
15.41_671.2710m/z	TR6244_c0_g1	0.600927	0.0387813
15.41_683.2455m/z	TR6244_c0_g1	0.599291	0.0394565
15.76_652.2898n	TR6244_c0_g1	0.38051	0.222386
18.08_546.3906n	TR6244_c0_g1	-0.901156	6.28166e-05
3.73_482.1745m/z	TR6244_c0_g1	0.871908	0.000218182
3.79_448.1942m/z	TR6244_c0_g1	0.896666	7.78345e-05
4.10_229.0858m/z	TR6244_c0_g1	0.788817	0.00229215
4.16_257.1382m/z	TR6244_c0_g1	-0.905207	5.13161e-05
4.16_441.1731m/z	TR6244_c0_g1	-0.871973	0.000217654
4.43_281.1029m/z	TR6244_c0_g1	0.678644	0.0152501
5.20_553.1925m/z	TR6244_c0_g1	-0.104856	0.745701
6.05_501.3218m/z	TR6244_c0_g1	-0.271645	0.393055
6.80_599.1983m/z	TR6244_c0_g1	-0.457382	0.13491
10.83_945.7187m/z	TR6443_c0_g1	-0.633629	0.0269504
10.84_929.5126m/z	TR6443_c0_g1	-0.638409	0.0254713
13.83_703.2256m/z	TR6443_c0_g1	0.52268	0.0812457
13.83_719.2211m/z	TR6443_c0_g1	0.508272	0.0915551
13.83_721.2324m/z	TR6443_c0_g1	0.537583	0.0714452
14.16_409.1882m/z	TR6443_c0_g1	0.98423	7.48212e-09
14.26_243.2106m/z	TR6443_c0_g1	0.934949	8.21967e-06
14.26_261.2211m/z	TR6443_c0_g1	0.93771	6.64831e-06
14.26_335.2582m/z	TR6443_c0_g1	0.944267	3.85523e-06
14.26_349.1982m/z	TR6443_c0_g1	0.902275	5.94554e-05
14.26_353.2683m/z	TR6443_c0_g1	0.935749	7.73676e-06
14.60_263.2367m/z	TR6443_c0_g1	0.958152	9.42084e-07
14.60_355.2832m/z	TR6443_c0_g1	0.95685	1.09564e-06
14.70_245.2261m/z	TR6443_c0_g1	0.920366	2.20397e-05
14.70_337.2735m/z	TR6443_c0_g1	0.92255	1.92512e-05
14.70_354.2764n	TR6443_c0_g1	0.912705	3.443e-05
14.70_653.2608m/z	TR6443_c0_g1	0.806293	0.00153591
14.71_309.1671m/z	TR6443_c0_g1	0.913341	3.32302e-05
15.11_429.1946m/z	TR6443_c0_g1	0.967744	2.60518e-07
15.37_365.2684m/z	TR6443_c0_g1	0.92875	1.282e-05
15.42_293.2473m/z	TR6443_c0_g1	0.975636	6.49019e-08
15.46_713.2560m/z	TR6443_c0_g1	0.599341	0.0394358
15.58_567.4195m/z	TR6443_c0_g1	0.511021	0.0895231
15.75_295.2630m/z	TR6443_c0_g1	0.96718	2.83814e-07
4.57_323.1246m/z	TR6443_c0_g1	0.95414	1.47888e-06
0.66_199.0009m/z	TR6443_c0_g1	0.866619	0.000264634
0.77_606.0743m/z	TR6443_c0_g1	0.499258	0.0984339
0.94_129.0192m/z	TR6443_c0_g1	0.874333	0.000199139
0.95_130.9984m/z	TR6443_c0_g1	0.848136	0.000490136
0.95_87.0086m/z	TR6443_c0_g1	0.885777	0.000126036
1.12_111.0086m/z	TR6443_c0_g1	0.838197	0.00066118
13.35_689.2099m/z	TR6443_c0_g1	0.477497	0.116443
15.00_609.2711m/z	TR6443_c0_g1	0.413918	0.181016
15.07_357.2992m/z	TR6443_c0_g1	0.887316	0.00011809
15.17_265.2524m/z	TR6443_c0_g1	0.89192	9.66247e-05
15.18_273.1307m/z	TR6443_c0_g1	0.694047	0.0122812
15.20_827.4928m/z	TR6443_c0_g1	0.505913	0.0933224
15.41_671.2710m/z	TR6443_c0_g1	0.633405	0.0270213
15.41_683.2455m/z	TR6443_c0_g1	0.624725	0.0298698
15.76_652.2898n	TR6443_c0_g1	0.404053	0.19269
18.08_546.3906n	TR6443_c0_g1	-0.899005	6.96948e-05
3.73_482.1745m/z	TR6443_c0_g1	0.893144	9.14714e-05
3.79_448.1942m/z	TR6443_c0_g1	0.848736	0.000481028
4.10_229.0858m/z	TR6443_c0_g1	0.823563	0.000993179
4.16_257.1382m/z	TR6443_c0_g1	-0.901249	6.25337e-05
4.16_441.1731m/z	TR6443_c0_g1	-0.886982	0.000119776
4.43_281.1029m/z	TR6443_c0_g1	0.704236	0.0105683
5.20_553.1925m/z	TR6443_c0_g1	-0.119997	0.710292
6.05_501.3218m/z	TR6443_c0_g1	-0.262813	0.409214
[truncated: 501 more rows]
